# Supplementary material for: Most large structural variants in cancer genomes can be detected without long reads
Source: Nat Genet. 2023 Nov 9;55(12):2139–48. doi: 10.1038/s41588-023-01540-6 (PMC10703688; doi:10.1038/s41588-023-01540-6)
Supplement: Supplementary file 3 — Statistical source data for Fig. 1. [file 41588_2023_1540_MOESM3_ESM.xlsx]

## Sheet: 1B
method	median.precision	precision.lower	precision.upper	median.recall	recall.lower	recall.upper	method.level
sequenza	0.245212	0.0963902	0.427707	0.396033	0.333333	0.465741	sequenza
ASCAT	0.0761589	0.017094	0.199336	0.430605	0.272727	0.583333	ASCAT
JaBbA v1	0.792175	0.612455	0.895783	0.946291	0.871262	0.983713	JaBbA v1
TITAN	0.0542943	0.0186723	0.125464	0.4	0.293759	0.5	TITAN
FACETS	0.0636906	0.0235634	0.11183	0.25	0.191991	0.333333	FACETS
JaBbA v0	0.324003	0.0720346	0.676559	0.829288	0.566991	0.924724	JaBbA v0

## Sheet: 1C
sample	final_njuncs	final_nsomatic
	3	5
	43	15
	23	0
	31	6
	81	4
	74	20
	140	39
	81	33
	35	5
	14	14
	51	37
	146	98
	73	26
	91	24
	87	14
	80	12
	180	64
	37	8
	1	0
	83	62
	151	26
	88	23
	109	91
	191	10
	219	53
	39	26
	88	63
	52	46
	164	41
	10	17
	102	27
	88	36
	186	66
	28	8
	213	62
	59	22
	5	2
	144	44
	196	30
	253	43
	494	80
	8	11
	166	115
	113	25
	195	91
	65	19
	92	10
	98	163
	87	25
	0	32
	47	24
	137	17
	7	12
	563	153
	293	47
	90	15
	95	28
	130	28
	149	53
	66	18
	184	46
	400	70
	179	81
	83	7
	194	13
	184	73
	133	19
	460	75
	12	7
	179	26
	99	35
	70	7
	102	27
	209	21
	134	38
	267	18
	36	9
	112	36
	59	15
	10	0
	267	39
	96	28
	143	44
	365	60
	114	8
	112	15
	177	15
	941	137
	78	20
	13	2
	193	30
	158	41
	153	8
	4	2
	229	156
	68	337
	172	38
	98	11
	211	49
	67	17
	27	37
	11	19
	161	65
	49	24
	169	72
	120	64
	61	17
	2	1
	2	0
	0	0
	260	82
	84	16
	129	38
	100	42
	0	1
	0	0
	0	0
	1	2
	0	0
	1	0
	0	1
	0	0
	0	2
	0	0
	0	0
	0	1
	0	0
	0	0
	0	0
	0	0
	1	0
	2	0
	0	3
	0	0
	0	0
	1	1
	0	0
	0	2
	0	0
	0	0
	0	2
	0	0
	2	0
	1	0
	2	0
	0	0
	0	0
	0	0
	0	2
	2	0
	111	155
	309	47
	73	14
	14	18
	0	3
	0	0
	2	2
	1	2
	2	2
	0	2
	2	0
	0	1
	0	0
	102	26
	42	13
	89	38
	88	27
	75	16
	277	49
	20	16
	14	10
	4	2
	61	17
	1	2
	8	0
	9	3
	3	6
	104	37
	0	3
	0	0
	0	0
	31	14
	8	35
	45	137
	43	20
	175	51
	34	3
	101	27
	18	160
	60	15
	33	11
	74	25
	35	13
	51	24
	109	38
	252	76
	75	30
	81	32
	312	121
	671	59
	197	51
	43	10
	99	39
	178	52
	88	15
	141	59
	12	21
	0	4
	11	18
	3	4
	23	7
	16	64
	202	6
	25	9
	121	80
	3	4
	6	3
	8	2
	2	3
	3	2
	1	0
	65	10
	3	7
	0	6
	49	50
	26	5
	2	11
	6	4
	1	5
	1	9
	4	2
	3	12
	4	3
	37	19
	45	28
	24	9
	12	7
	65	22
	203	48
	16	61
	16	7
	130	15
	0	5
	2	41
	4	8
	25	5
	1	8
	63	8
	7	6
	26	10
	855	217
	8	6
	81	30
	100	31
	2	6
	25	5
	6	4
	36	12
	4	5
	104	15
	0	5
	13	6
	6	2
	10	15
	3	3
	1	2
	3	4
	14	10
	15	37
	14	19
	0	5
	5	6
	2	11
	3	4
	6	4
	0	12
	21	9
	7	10
	5	6
	71	34
	22	18
	4	3
	3	7
	6	19
	5	5
	4	11
	28	15
	4	3
	2	3
	18	3
	4	5
	11	31
	314	39
	49	7
	22	4
	75	23
	40	7
	1	1
	6	0
	13	7
	327	56
	133	7
	22	7
	44	15
	80	36
	34	10
	5	0
	14	6
	4	18
	5	12
	7	0
	293	105
	249	38
	5	2
	159	73
	13	6
	434	73
	72	127
	104	37
	0	4
	21	5
	3	2
	19	1
	107	26
	5	3
	5	3
	2	1
	382	78
	181	13
	84	22
	27	2
	12	0
	114	44
	8	3
	5	1
	44	13
	158	53
	72	74
	27	74
	9	2
	19	1
	13	3
	131	65
	362	56
	3	1
	4	11
	3	3
	113	21
	3	2
	1	0
	278	72
	208	108
	197	37
	64	60
	3	0
	17	3
	24	2
	7	1
	198	36
	63	38
	63	5
	164	105
	25	8
	17	4
	203	53
	4	3
	21	10
	4	6
	206	54
	96	65
	302	65
	149	173
	101	23
	4	2
	1	3
	122	11
	267	55
	97	34
	410	80
	95	29
	22	2
	58	17
	206	76
	108	22
	251	68
	52	14
	2	2
	213	66
	193	56
	143	33
	6	2
	56	16
	234	64
	7	6
	27	20
	68	18
	125	40
	33	15
	106	16
	114	28
	382	59
	3	2
	129	76
	0	0
	31	24
	12	22
	1	2
	48	15
	53	25
	40	45
	21	5
	39	10
	57	27
	75	58
	66	3
	545	95
	73	19
	625	174
	197	203
	26	5
	151	27
	88	41
	39	10
	12	2
	14	2
	71	11
	306	67
	6	13
	66	19
	178	68
	27	8
	0	0
	0	1
	10	6
	0	0
	4	2
	0	0
	3	0
	0	1
	0	0
	179	45
	0	0
	1	0
	0	0
	2	0
	324	54
	11	4
	83	26
	2	0
	1	0
	1	1
	0	0
	1	0
	0	0
	4	1
	0	1
	6	4
	2	0
	13	11
	29	10
	21	26
	2	1
	8	0
	2	0
	0	1
	0	1
	64	9
	4	0
	0	2
	0	0
	208	43
	0	0
	0	0
	287	86
	27	20
	189	28
	23	1
	31	3
	310	63
	85	13
	90	37
	150	61
	147	45
	278	55
	152	33
	118	48
	302	88
	12	5
	9	2
	10	0
	8	4
	172	56
	193	75
	89	27
	31	10
	179	20
	276	66
	6	3
	161	23
	118	41
	97	31
	88	34
	242	41
	19	24
	98	10
	100	37
	161	58
	144	25
	183	30
	170	29
	163	59
	32	1
	82	10
	34	15
	0	1
	184	87
	272	48
	1	5
	236	28
	196	61
	415	58
	161	86
	6	0
	156	72
	86	39
	317	84
	170	29
	60	185
	0	1
	183	343
	3	5
	282	42
	220	113
	115	75
	103	21
	209	108
	6	13
	104	77
	4	6
	3	0
	0	4
	43	17
	41	12
	232	58
	39	28
	306	89
	19	13
	16	6
	520	73
	122	83
	53	20
	45	54
	125	16
	22	13
	15	5
	139	97
	195	72
	360	141
	74	17
	15	9
	79	31
	0	2
	163	49
	28	9
	197	43
	522	100
	1510	325
	868	141
	478	81
	186	94
	36	15
	35	5
	26	7
	8	4
	190	46
	128	51
	247	49
	50	26
	180	74
	176	26
	50	13
	69	31
	59	31
	188	97
	364	64
	96	103
	22	7
	143	22
	32	8
	107	79
	282	82
	121	59
	820	90
	952	125
	455	22
	72	53
	95	80
	27	10
	25	14
	111	32
	15	13
	23	8
	33	23
	128	54
	34	34
	214	42
	269	122
	628	101
	554	37
	418	67
	982	238
	1663	325
	31	5
	151	51
	15	6
	57	41
	52	4
	13	3
	47	25
	115	70
	21	8
	166	30
	694	138
	208	39
	229	134
	384	81
	26	5
	172	67
	38	9
	1	1
	37	26
	148	122
	24	11
	33	40
	21	17
	5	1
	27	7
	65	7
	2	1
	0	0
	32	6
	73	6
	0	0
	6	4
	0	0
	57	23
	45	29
	280	46
	235	55
	40	20
	33	18
	56	10
	46	24
	161	54
	17	44
	93	71
	49	39
	154	23
	628	199
	270	62
	57	52
	222	58
	263	39
	174	72
	240	51
	347	224
	251	44
	45	60
	233	82
	21	12
	73	11
	1	4
	41	7
	372	41
	0	1
	263	71
	13	4
	275	175
	0	2
	8	28
	111	72
	134	89
	149	60
	163	68
	188	53
	10	16
	19	24
	156	27
	3	7
	88	39
	2	4
	65	24
	11	0
	197	77
	210	57
	0	3
	2	3
	8	16
	400	209
	201	48
	5	1
	68	19
	240	58
	2	2
	185	46
	89	50
	97	29
	111	172
	455	80
	7	5
	28	18
	60	31
	143	75
	181	47
	110	84
	59	22
	230	141
	88	54
	449	125
	30	6
	371	61
	0	0
	233	80
	10	15
	19	13
	3	0
	1	3
	147	43
	2	7
	15	2
	64	17
	1	0
	142	63
	4	7
	0	0
	28	7
	36	14
	354	237
	654	134
	1086	68
	265	80
	204	83
	40	49
	324	102
	117	84
	443	101
	48	210
	458	149
	746	142
	192	33
	23	12
	50	8
	70	45
	17	13
	613	114
	18	3
	22	13
	40	8
	4	1
	41	10
	100	17
	83	26
	44	12
	408	78
	65	15
	79	33
	75	61
	27	36
	170	107
	50	56
	1026	247
	89	27
	2	10
	336	136
	458	96
	624	47
	137	21
	375	101
	371	73
	900	79
	300	25
	36	7
	41	7
	25	13
	23	2
	743	116
	24	7
	47	6
	116	69
	83	32
	115	31
	26	19
	70	10
	274	53
	20	9
	50	12
	65	51
	75	17
	103	21
	54	25
	162	17
	54	24
	185	19
	82	38
	16	38
	118	32
	228	38
	160	62
	308	37
	43	18
	71	17
	92	14
	98	31
	64	11
	83	60
	31	13
	412	20
	30	6
	71	50
	53	11
	317	33
	34	12
	21	2
	43	17
	221	100
	47	18
	80	17
	33	17
	28	23
	70	29
	106	24
	29	7
	118	6
	21	5
	413	80
	49	5
	21	6
	30	8
	43	6
	58	9
	47	21
	23	8
	0	2
	18	5
	290	56
	0	0
	105	45
	277	63
	60	17
	418	52
	1106	366
	25	7
	93	33
	19	7
	38	5
	87	19
	82	16
	56	25
	51	13
	41	14
	50	11
	63	27
	80	25
	190	25
	70	16
	80	24
	21	5
	85	9
	50	4
	66	41
	91	18
	71	14
	25	8
	212	31
	34	4
	93	17
	18	1
	32	21
	15	3
	74	11
	0	2
	43	8
	7	5
	1057	252
	56	18
	133	19
	50	10
	51	12
	231	94
	215	25
	32	127
	51	13
	91	12
	44	11
	221	34
	239	20
	226	23
	110	13
	269	35
	160	139
	292	74
	291	75
	33	12
	67	2
	208	22
	203	26
	220	27
	217	24
	69	8
	18	2
	57	26
	123	4
	143	548
	551	189
	87	49
	40	7
	20	25
	104	47
	14	2
	20	12
	489	112
	109	20
	83	33
	327	27
	54	11
	0	0
	83	26
	0	2
	46	13
	232	40
	10	70
	63	6
	40	2
	27	8
	12	10
	15	5
	48	17
	437	60
	237	82
	184	32
	47	9
	3	0
	160	63
	191	54
	166	43
	255	56
	164	52
	115	84
	206	31
	138	27
	235	60
	224	41
	214	45
	223	68
	108	69
	199	27
	105	58
	356	139
	101	26
	227	38
	156	87
	105	14
	435	98
	47	48
	125	42
	121	49
	108	20
	350	39
	30	0
	123	30
	148	43
	185	33
	125	25
	159	36
	183	19
	131	39
	3	3
	175	73
	171	83
	203	41
	350	57
	96	34
	286	111
	29	40
	141	56
	101	23
	93	14
	215	43
	122	49
	135	25
	121	40
	33	21
	216	23
	415	137
	348	92
	352	31
	256	95
	198	43
	176	27
	95	35
	102	31
	223	50
	149	27
	163	25
	57	13
	63	9
	191	45
	362	86
	110	24
	405	73
	211	34
	117	26
	73	19
	170	30
	192	54

## Sheet: 1D
pair	tumor_type_final	count	type	sample	label
0128	GBM	6	junction	0128	GBM
0145	GBM	86	junction	0145	GBM
0155	GBM	46	junction	0155	GBM
0185	GBM	62	junction	0185	GBM
0210	GBM	162	junction	0210	GBM
0211	GBM	148	junction	0211	GBM
0214	GBM	280	junction	0214	GBM
04616fe602821be83f79e051c94c28347907f72d4e9ed5d7f1f50d4cfcd71d01	ESAD	162	junction	04616fe602821be83f79e051c94c28347907f72d4e9ed5d7f1f50d4cfcd71d01	ESAD
04f3767cc1c78f1c22b06d659d308741a588e272ee723b39f744913ad669cd6e	ESAD	70	junction	04f3767cc1c78f1c22b06d659d308741a588e272ee723b39f744913ad669cd6e	ESAD
05fb093d1b2af292cf0795316e9afefc4407f42256c914edeee9ac881e1d435c	ESAD	28	junction	05fb093d1b2af292cf0795316e9afefc4407f42256c914edeee9ac881e1d435c	ESAD
0648	GBM	102	junction	0648	GBM
0723	OV	292	junction	0723	OV
0725	OV	146	junction	0725	OV
0727	OV	182	junction	0727	OV
0744	GBM	174	junction	0744	GBM
0745	GBM	160	junction	0745	GBM
0751	OV	360	junction	0751	OV
0877	GBM	74	junction	0877	GBM
0881	GBM	2	junction	0881	GBM
0890	OV	166	junction	0890	OV
0906	OV	302	junction	0906	OV
0912	OV	176	junction	0912	OV
0934	OV	218	junction	0934	OV
0937	OV	382	junction	0937	OV
0938	OV	438	junction	0938	OV
0980	OV	78	junction	0980	OV
0982	OV	176	junction	0982	OV
0985a2e91070b77b0b7c61278b04d7c88864c3bc670f211bdb54bd09d271e986	ESAD	104	junction	0985a2e91070b77b0b7c61278b04d7c88864c3bc670f211bdb54bd09d271e986	ESAD
0a85375cbfa23eb57f9647c13fd4a774922afd325ecca61ecb70f165f9e4a2e7	ESAD	328	junction	0a85375cbfa23eb57f9647c13fd4a774922afd325ecca61ecb70f165f9e4a2e7	ESAD
0b64dd9e11bfd9b7413d9bc770587b6a011e6946109f1ded24bc92444941450f	ESAD	20	junction	0b64dd9e11bfd9b7413d9bc770587b6a011e6946109f1ded24bc92444941450f	ESAD
0c18dae928d5146c8b0d052a9ceffa02ef1e1dcd70f6e5c321dc37c264d9c9d8	ESAD	204	junction	0c18dae928d5146c8b0d052a9ceffa02ef1e1dcd70f6e5c321dc37c264d9c9d8	ESAD
0de0307feaaebcd92622acc19aae9d7ee9ba2f58ebfbfa0f8523e7c4f1b6b3ed	ESAD	176	junction	0de0307feaaebcd92622acc19aae9d7ee9ba2f58ebfbfa0f8523e7c4f1b6b3ed	ESAD
0df54561b9dfce1f7cc6d2858f039c4303727558615b8b64364b09c963da19f2	ESAD	372	junction	0df54561b9dfce1f7cc6d2858f039c4303727558615b8b64364b09c963da19f2	ESAD
0f48df24681bff9daca43ea351a061173146b5a347774916fe4c683d65016d10	ESAD	56	junction	0f48df24681bff9daca43ea351a061173146b5a347774916fe4c683d65016d10	ESAD
0f4a8719dbb0caa2e8b638fe74d6c6dac6ca5ee91e4423e421a2f013170a0ca9	ESAD	426	junction	0f4a8719dbb0caa2e8b638fe74d6c6dac6ca5ee91e4423e421a2f013170a0ca9	ESAD
1063	GBM	118	junction	1063	GBM
1086	GBM	10	junction	1086	GBM
1103	OV	288	junction	1103	OV
1110	OV	392	junction	1110	OV
1118	OV	506	junction	1118	OV
1124	OV	988	junction	1124	OV
11524e868cfd06698eab18840572b21e31ccc772b0a6d8695b31b16d44f17de9	ESAD	16	junction	11524e868cfd06698eab18840572b21e31ccc772b0a6d8695b31b16d44f17de9	ESAD
1319	OV	332	junction	1319	OV
1331	OV	226	junction	1331	OV
1347	OV	390	junction	1347	OV
1349	OV	130	junction	1349	OV
1367	OV	184	junction	1367	OV
1371	OV	196	junction	1371	OV
1395dc4ab7c754e0a84c8daa3996f16e5caf11169f8a9be6c800f6da00474321	ESAD	174	junction	1395dc4ab7c754e0a84c8daa3996f16e5caf11169f8a9be6c800f6da00474321	ESAD
1401	GBM	0	junction	1401	GBM
1419	OV	94	junction	1419	OV
1459	GBM	274	junction	1459	GBM
1460	GBM	14	junction	1460	GBM
1466	OV	1126	junction	1466	OV
1487	OV	586	junction	1487	OV
1491	OV	180	junction	1491	OV
1514	OV	190	junction	1514	OV
1542	OV	260	junction	1542	OV
1544	OV	298	junction	1544	OV
1548	OV	132	junction	1548	OV
1552	OV	368	junction	1552	OV
1557	OV	800	junction	1557	OV
1558	OV	358	junction	1558	OV
1562	OV	166	junction	1562	OV
1570	OV	388	junction	1570	OV
1571	OV	368	junction	1571	OV
1574	OV	266	junction	1574	OV
158cfbabcfd84336aa6020a4d6ada78d4cc56ae83802bc9e556d5d8db44af5a0	ESAD	920	junction	158cfbabcfd84336aa6020a4d6ada78d4cc56ae83802bc9e556d5d8db44af5a0	ESAD
160-23716-53M-37--160-24958N-132N-GST	BE	24	junction	160-23716-53M-37--160-24958N-132N-GST	BE
1614	OV	358	junction	1614	OV
163-23740-14O-37--163-25059N-78R-BLD	BE	198	junction	163-23740-14O-37--163-25059N-78R-BLD	BE
163-23749-256R-35--163-25059N-78R-BLD	BE	140	junction	163-23749-256R-35--163-25059N-78R-BLD	BE
163-24735-256R-37--163-25059N-78R-BLD	BE	204	junction	163-24735-256R-37--163-25059N-78R-BLD	BE
1632	OV	418	junction	1632	OV
1634	OV	268	junction	1634	OV
1666	OV	534	junction	1666	OV
169-23764-9T-31--169-25060N-253T-BLD	BE	72	junction	169-23764-9T-31--169-25060N-253T-BLD	BE
16ecc4c79c9ca8e731e9b0f2c6084c63a222890ad8d448c3658736dbc6eff424	ESAD	224	junction	16ecc4c79c9ca8e731e9b0f2c6084c63a222890ad8d448c3658736dbc6eff424	ESAD
17-23561-12V-35--17-24987N-105W-BLD	BE	118	junction	17-23561-12V-35--17-24987N-105W-BLD	BE
170-23794-3B-33--170-25061N-3B-BLD	BE	20	junction	170-23794-3B-33--170-25061N-3B-BLD	BE
1970	GBM	534	junction	1970	GBM
1a7f4e2b2564e194582ecffac318dfbe9d86f05a14aac53a5f2e2cd58840ee08	ESAD	192	junction	1a7f4e2b2564e194582ecffac318dfbe9d86f05a14aac53a5f2e2cd58840ee08	ESAD
1abf4349b13234e9b9fe664e01960425da9b129ab4b0672a69a7103ff2bbf1b3	ESAD	286	junction	1abf4349b13234e9b9fe664e01960425da9b129ab4b0672a69a7103ff2bbf1b3	ESAD
2000	OV	730	junction	2000	OV
2024	OV	228	junction	2024	OV
2045	OV	224	junction	2045	OV
2050	OV	354	junction	2050	OV
206327a320b967baf95361f43e814ab0e7403364077c84c04722fbe9ec7d59d5	ESAD	1882	junction	206327a320b967baf95361f43e814ab0e7403364077c84c04722fbe9ec7d59d5	ESAD
21c3e02f465c21c25f5d7f686b2a5c008b23a2fe5469d444ebac07f80a1ab962	ESAD	156	junction	21c3e02f465c21c25f5d7f686b2a5c008b23a2fe5469d444ebac07f80a1ab962	ESAD
222-24370-179T-30--222-25062N-179T-BLD	BE	26	junction	222-24370-179T-30--222-25062N-179T-BLD	BE
2290	OV	386	junction	2290	OV
2368c29b6b700ca640ec887666c149533231d23ea32718f6f83469b5b7ad7aa4	ESAD	316	junction	2368c29b6b700ca640ec887666c149533231d23ea32718f6f83469b5b7ad7aa4	ESAD
2391	OV	306	junction	2391	OV
23b4e52e36a71bfaec31dc2edd3dd8e6e470acab656279f96446223d654bcc2c	ESAD	8	junction	23b4e52e36a71bfaec31dc2edd3dd8e6e470acab656279f96446223d654bcc2c	ESAD
2400	OV	458	junction	2400	OV
2485	GBM	136	junction	2485	GBM
2567f5779f07b4c5c7eb5ef5590da72b4352f0e6353150b2f090c354721bebac.2	ESAD	344	junction	2567f5779f07b4c5c7eb5ef5590da72b4352f0e6353150b2f090c354721bebac.2	ESAD
2570	GBM	196	junction	2570	GBM
25e28ea260c8efc00de88a0e7da3faaea440f68bd539d0fd84e7ae65e33969e9	ESAD	422	junction	25e28ea260c8efc00de88a0e7da3faaea440f68bd539d0fd84e7ae65e33969e9	ESAD
2613d0db5e6407392aa2691ce6db2a4cd350b8258a38f9f6b83844d3b8272685	ESAD	134	junction	2613d0db5e6407392aa2691ce6db2a4cd350b8258a38f9f6b83844d3b8272685	ESAD
2629	GBM	54	junction	2629	GBM
266-24139-216R-35--266-25063N-67T-BLD	BE	22	junction	266-24139-216R-35--266-25063N-67T-BLD	BE
266-24145-67T-34--266-25063N-67T-BLD	BE	322	junction	266-24145-67T-34--266-25063N-67T-BLD	BE
2689	COAD	98	junction	2689	COAD
26f2fa25ea0f6c5911c3bb6e831d1a0633ce4a1b295028b1d09ef01b66cec0e2	ESAD	338	junction	26f2fa25ea0f6c5911c3bb6e831d1a0633ce4a1b295028b1d09ef01b66cec0e2	ESAD
2747cb2bda1947f81a644e04eff504ecc3bdbd1723259420fbabbb33c4d2c8c0	ESAD	240	junction	2747cb2bda1947f81a644e04eff504ecc3bdbd1723259420fbabbb33c4d2c8c0	ESAD
279-24924-251R-32--279-25064N-76R-BLD	BE	122	junction	279-24924-251R-32--279-25064N-76R-BLD	BE
2905	AML	4	junction	2905	AML
2906	AML	4	junction	2906	AML
2907	AML	0	junction	2907	AML
290d0ca5c183044dfb5f98e84bd2ca1cdc2aab53a21f90070e15694bd111fe16	ESAD	520	junction	290d0ca5c183044dfb5f98e84bd2ca1cdc2aab53a21f90070e15694bd111fe16	ESAD
295-24169-103S-32--295-25066N-72T-BLD	BE	168	junction	295-24169-103S-32--295-25066N-72T-BLD	BE
295-24175-215U-34--295-25066N-72T-BLD	BE	258	junction	295-24175-215U-34--295-25066N-72T-BLD	BE
295-24184-215U-26--295-25066N-72T-BLD	BE	200	junction	295-24184-215U-26--295-25066N-72T-BLD	BE
2963	AML	0	junction	2963	AML
2964	AML	0	junction	2964	AML
2965	AML	0	junction	2965	AML
2966	AML	2	junction	2966	AML
2967	AML	0	junction	2967	AML
2968	AML	2	junction	2968	AML
2969	AML	0	junction	2969	AML
2970	AML	0	junction	2970	AML
2971	AML	0	junction	2971	AML
2972	AML	0	junction	2972	AML
2973	AML	0	junction	2973	AML
2974	AML	0	junction	2974	AML
2975	AML	0	junction	2975	AML
2976	AML	0	junction	2976	AML
2977	AML	0	junction	2977	AML
2978	AML	0	junction	2978	AML
2979	AML	2	junction	2979	AML
2980	AML	4	junction	2980	AML
2981	AML	0	junction	2981	AML
2982	AML	0	junction	2982	AML
2983	AML	0	junction	2983	AML
2984	AML	2	junction	2984	AML
2985	AML	0	junction	2985	AML
2986	AML	0	junction	2986	AML
2987	AML	0	junction	2987	AML
2988	AML	0	junction	2988	AML
2989	AML	0	junction	2989	AML
2990	AML	0	junction	2990	AML
2991	AML	4	junction	2991	AML
2992	AML	2	junction	2992	AML
2994	AML	4	junction	2994	AML
2995	AML	0	junction	2995	AML
2996	AML	0	junction	2996	AML
2997	AML	0	junction	2997	AML
2998	AML	0	junction	2998	AML
2999	AML	4	junction	2999	AML
29a625999b8102746891f4265f9aa80f576db0b4c9456ec553ff482d3c40d130	ESAD	222	junction	29a625999b8102746891f4265f9aa80f576db0b4c9456ec553ff482d3c40d130	ESAD
2e9faf28897dce9dfd86c06101eeb7398f945036f13b5f9d78dd02e113ca9ba0	ESAD	618	junction	2e9faf28897dce9dfd86c06101eeb7398f945036f13b5f9d78dd02e113ca9ba0	ESAD
2ebb7adee8dfe2f8b4c0820e9138453f3cf04251686f23b187dc30bbb52c7e96	ESAD	146	junction	2ebb7adee8dfe2f8b4c0820e9138453f3cf04251686f23b187dc30bbb52c7e96	ESAD
2fb1c6063e7eac401741e82a2ac128bcb29d26f1f7f301a41db9878ab7813f6f	ESAD	28	junction	2fb1c6063e7eac401741e82a2ac128bcb29d26f1f7f301a41db9878ab7813f6f	ESAD
3000	AML	0	junction	3000	AML
3002	AML	0	junction	3002	AML
3005	AML	4	junction	3005	AML
3006	AML	2	junction	3006	AML
3007	AML	4	junction	3007	AML
3008	AML	0	junction	3008	AML
3009	AML	4	junction	3009	AML
3011	AML	0	junction	3011	AML
3012	AML	0	junction	3012	AML
303-23602-162L-38--303-24975N-41K-GST	BE	204	junction	303-23602-162L-38--303-24975N-41K-GST	BE
303-24660-41K-37--303-24975N-41K-GST	BE	84	junction	303-24660-41K-37--303-24975N-41K-GST	BE
30e5afb25005a5e6be0c0de29595b2f386308b854a73ffb15317c461718205a3	ESAD	178	junction	30e5afb25005a5e6be0c0de29595b2f386308b854a73ffb15317c461718205a3	ESAD
310c15daca2145583e440e9a6ab0a6052fa4d08b785d6455e961ddce5f4196fe	ESAD	176	junction	310c15daca2145583e440e9a6ab0a6052fa4d08b785d6455e961ddce5f4196fe	ESAD
3132e2e81d7312f93261cf771e6cc7fdb8e4800ad8d8f4049bc7ec800b08789c	ESAD	150	junction	3132e2e81d7312f93261cf771e6cc7fdb8e4800ad8d8f4049bc7ec800b08789c	ESAD
3180f8e34845d13e27dddd90486dba083cd87a340d919f75d29859766f7faee4	ESAD	554	junction	3180f8e34845d13e27dddd90486dba083cd87a340d919f75d29859766f7faee4	ESAD
322-24807-130U-35--322-25067N-130U-BLD	BE	40	junction	322-24807-130U-35--322-25067N-130U-BLD	BE
3308	KIRC	28	junction	3308	KIRC
3324	KIRC	8	junction	3324	KIRC
3363	KIRC	122	junction	3363	KIRC
3372	KIRC	2	junction	3372	KIRC
3387	KIRC	16	junction	3387	KIRC
3454	KIRC	18	junction	3454	KIRC
3455	KIRC	6	junction	3455	KIRC
3466	KIRP	208	junction	3466	KIRP
3467	KIRP	0	junction	3467	KIRP
3468	KIRP	0	junction	3468	KIRP
3472	KIRP	0	junction	3472	KIRP
3518	COAD	62	junction	3518	COAD
3574	COAD	16	junction	3574	COAD
3582	COAD	90	junction	3582	COAD
3593	COAD	86	junction	3593	COAD
3709a5a3c78b4c21fbcb1c6a15585b054c7d38d78a1eaa3ee4e307b79c11a245	ESAD	350	junction	3709a5a3c78b4c21fbcb1c6a15585b054c7d38d78a1eaa3ee4e307b79c11a245	ESAD
3727	COAD	68	junction	3727	COAD
37b56a8f3ae8e0f59bb17651a17a967c62f68204140b18b7d013c9eb709c69d2	ESAD	202	junction	37b56a8f3ae8e0f59bb17651a17a967c62f68204140b18b7d013c9eb709c69d2	ESAD
3885	COAD	36	junction	3885	COAD
3890	COAD	120	junction	3890	COAD
3896	COAD	66	junction	3896	COAD
391-23521-155R-31--391-25007N-73P-BLD	BE	148	junction	391-23521-155R-31--391-25007N-73P-BLD	BE
391-23866-82K-33--391-25007N-73P-BLD	BE	70	junction	391-23866-82K-33--391-25007N-73P-BLD	BE
3913	COAD	102	junction	3913	COAD
392af0c06be23bfc8f60361072a92268662bbd2b0d739201b5c2fbd34a15ff25	ESAD	218	junction	392af0c06be23bfc8f60361072a92268662bbd2b0d739201b5c2fbd34a15ff25	ESAD
396-24457-98A-37--396-25008N-52V-BLD	BE	504	junction	396-24457-98A-37--396-25008N-52V-BLD	BE
3abbfc149ac774b3bfed61438c5b709a473c0c6162b6707b4bfebef67eba2260	ESAD	150	junction	3abbfc149ac774b3bfed61438c5b709a473c0c6162b6707b4bfebef67eba2260	ESAD
3abbfc149ac774b3bfed61438c5b709a473c0c6162b6707b4bfebef67eba2260.2	ESAD	162	junction	3abbfc149ac774b3bfed61438c5b709a473c0c6162b6707b4bfebef67eba2260.2	ESAD
3b5faf7fabba6b596f14ce281d06ce54af4d06027722cfd3114b8f0dd0ab5ae5	ESAD	624	junction	3b5faf7fabba6b596f14ce281d06ce54af4d06027722cfd3114b8f0dd0ab5ae5	ESAD
3d6f94f343bc3a4030461f304e31d6aea165b3bb39f965d71697c7db8c1cee47	ESAD	1342	junction	3d6f94f343bc3a4030461f304e31d6aea165b3bb39f965d71697c7db8c1cee47	ESAD
3ecd9b003fa28a4fde294f8a7b8f0f260fcf21f80d9ca1cf4e6312caab88c6a7	ESAD	394	junction	3ecd9b003fa28a4fde294f8a7b8f0f260fcf21f80d9ca1cf4e6312caab88c6a7	ESAD
3f033a2314ecd6d19bd09179af1fd688ee38da8a63ea2b0879ec99d86e7460d6	ESAD	86	junction	3f033a2314ecd6d19bd09179af1fd688ee38da8a63ea2b0879ec99d86e7460d6	ESAD
3f09772b941e0dc3721126176238df54197fca741e9c633c0860bc68791c6e7a	ESAD	198	junction	3f09772b941e0dc3721126176238df54197fca741e9c633c0860bc68791c6e7a	ESAD
3ff03763c8288dca4d2513ab1f9ce95572eef640989b55b7ed10a722484ac238	ESAD	356	junction	3ff03763c8288dca4d2513ab1f9ce95572eef640989b55b7ed10a722484ac238	ESAD
4007	COAD	176	junction	4007	COAD
4015	COAD	282	junction	4015	COAD
4102009	MALY	24	junction	4102009	MALY
4103141	MALY	0	junction	4103141	MALY
4104893	MALY	22	junction	4104893	MALY
4105105	MALY	6	junction	4105105	MALY
4105746	MALY	46	junction	4105746	MALY
4108101	MALY	32	junction	4108101	MALY
4108992	MALY	404	junction	4108992	MALY
4111326	MALY	50	junction	4111326	MALY
4111337	MALY	242	junction	4111337	MALY
4112447	MALY	6	junction	4112447	MALY
4112512	MALY	12	junction	4112512	MALY
4113191	MALY	16	junction	4113191	MALY
4113825	MALY	4	junction	4113825	MALY
4114	KIRP	6	junction	4114	KIRP
4115	KIRP	2	junction	4115	KIRP
4116	KIRP	130	junction	4116	KIRP
4117	KIRP	6	junction	4117	KIRP
4119027	MALY	0	junction	4119027	MALY
4119279	MALY	98	junction	4119279	MALY
4120157	MALY	52	junction	4120157	MALY
4121361	MALY	4	junction	4121361	MALY
4124188	MALY	12	junction	4124188	MALY
4124542	MALY	2	junction	4124542	MALY
4125240	MALY	2	junction	4125240	MALY
4127766	MALY	8	junction	4127766	MALY
4130003	MALY	6	junction	4130003	MALY
4131095	MALY	8	junction	4131095	MALY
4131257	MALY	74	junction	4131257	MALY
4133263	MALY	90	junction	4133263	MALY
4133511	MALY	48	junction	4133511	MALY
4134005	MALY	24	junction	4134005	MALY
4134434	MALY	130	junction	4134434	MALY
4135099	MALY	406	junction	4135099	MALY
4135350	MALY	32	junction	4135350	MALY
4136702	MALY	32	junction	4136702	MALY
4138527	MALY	260	junction	4138527	MALY
4138885	MALY	0	junction	4138885	MALY
4139696	MALY	4	junction	4139696	MALY
4142267	MALY	8	junction	4142267	MALY
4142605	MALY	50	junction	4142605	MALY
4144633	MALY	2	junction	4144633	MALY
4144951	MALY	126	junction	4144951	MALY
4145056	MALY	14	junction	4145056	MALY
4145177	MALY	52	junction	4145177	MALY
4145528	MALY	1710	junction	4145528	MALY
4146289	MALY	16	junction	4146289	MALY
4147081	MALY	162	junction	4147081	MALY
4147968	MALY	200	junction	4147968	MALY
4149246	MALY	4	junction	4149246	MALY
4157186	MALY	50	junction	4157186	MALY
4159170	MALY	12	junction	4159170	MALY
4160100	MALY	72	junction	4160100	MALY
4160468	MALY	8	junction	4160468	MALY
4163639	MALY	208	junction	4163639	MALY
4165379	MALY	0	junction	4165379	MALY
4166151	MALY	26	junction	4166151	MALY
4166503	MALY	12	junction	4166503	MALY
4166706	MALY	20	junction	4166706	MALY
4170686	MALY	6	junction	4170686	MALY
4172511	MALY	2	junction	4172511	MALY
4174905	MALY	6	junction	4174905	MALY
4175837	MALY	28	junction	4175837	MALY
4176133	MALY	30	junction	4176133	MALY
4177434	MALY	28	junction	4177434	MALY
4177601	MALY	0	junction	4177601	MALY
4177810	MALY	10	junction	4177810	MALY
4177856	MALY	4	junction	4177856	MALY
4177987	MALY	6	junction	4177987	MALY
4178310	MALY	12	junction	4178310	MALY
4178345	MALY	0	junction	4178345	MALY
4178655	MALY	42	junction	4178655	MALY
4182393	MALY	14	junction	4182393	MALY
4184094	MALY	10	junction	4184094	MALY
4188398	MALY	142	junction	4188398	MALY
4189035	MALY	44	junction	4189035	MALY
4189200	MALY	8	junction	4189200	MALY
4189998	MALY	6	junction	4189998	MALY
4190495	MALY	12	junction	4190495	MALY
4190784	MALY	10	junction	4190784	MALY
4193278	MALY	8	junction	4193278	MALY
4193638	MALY	56	junction	4193638	MALY
4194218	MALY	8	junction	4194218	MALY
4194891	MALY	4	junction	4194891	MALY
4196670	MALY	36	junction	4196670	MALY
4198542	MALY	8	junction	4198542	MALY
4199714	MALY	22	junction	4199714	MALY
41db2179d8691b0d49e9bc19245ac8af93d9c637a498ec7ab822269664452482	ESAD	628	junction	41db2179d8691b0d49e9bc19245ac8af93d9c637a498ec7ab822269664452482	ESAD
42-24292-53L-36--42-24954N-53L-GST	BE	98	junction	42-24292-53L-36--42-24954N-53L-GST	BE
4280	STAD	44	junction	4280	STAD
42a2b2ad86b3d0f66ecec5ce1d8b0cca6e334d365d6434d2bf1050e9b2f97990	ESAD	150	junction	42a2b2ad86b3d0f66ecec5ce1d8b0cca6e334d365d6434d2bf1050e9b2f97990	ESAD
43-23593-29P-28--43-24956N-29P-GST	BE	80	junction	43-23593-29P-28--43-24956N-29P-GST	BE
4326	KIRC	2	junction	4326	KIRC
4327	KIRC	12	junction	4327	KIRC
4442	STAD	26	junction	4442	STAD
4443	STAD	654	junction	4443	STAD
445fe324ced35562aa4eb787ace04dc826bbc25ec67b236bba7f226837270672	ESAD	266	junction	445fe324ced35562aa4eb787ace04dc826bbc25ec67b236bba7f226837270672	ESAD
4474	STAD	44	junction	4474	STAD
450-23914-37P-34--450-25070N-120R-BLD	BE	88	junction	450-23914-37P-34--450-25070N-120R-BLD	BE
450-23923-120R-29--450-25070N-120R-BLD	BE	160	junction	450-23923-120R-29--450-25070N-120R-BLD	BE
450-24753-37P-29--450-25070N-120R-BLD	BE	68	junction	450-24753-37P-29--450-25070N-120R-BLD	BE
4639	KIRC	10	junction	4639	KIRC
4781	KIRC	28	junction	4781	KIRC
483-23830-132U-31--483-24961N-246S-GST	BE	8	junction	483-23830-132U-31--483-24961N-246S-GST	BE
4870	KIRC	10	junction	4870	KIRC
4885	KIRC	14	junction	4885	KIRC
48bba806613d4dc7b432d75c0069ee314684f6d69e3f52503b52f3150448dc14	ESAD	586	junction	48bba806613d4dc7b432d75c0069ee314684f6d69e3f52503b52f3150448dc14	ESAD
490ae7348c12a59b53192e341610b5c588783c80cbd969631ecf953ad0baf508	ESAD	498	junction	490ae7348c12a59b53192e341610b5c588783c80cbd969631ecf953ad0baf508	ESAD
4977	KIRC	10	junction	4977	KIRC
4e8a9e9de13e84cb13e7f68253d35f16e193470fcdb70f686c8bacfd2424356a	ESAD	318	junction	4e8a9e9de13e84cb13e7f68253d35f16e193470fcdb70f686c8bacfd2424356a	ESAD
5094	KIRC	26	junction	5094	KIRC
50da2d6b3ff31238fea9f4ebb147722fc306715eea709cd1107d229810ce4202	ESAD	868	junction	50da2d6b3ff31238fea9f4ebb147722fc306715eea709cd1107d229810ce4202	ESAD
512-23971-43R-27--512-25072N-306R-BLD	BE	144	junction	512-23971-43R-27--512-25072N-306R-BLD	BE
512-23977-306R-29--512-25072N-306R-BLD	BE	208	junction	512-23977-306R-29--512-25072N-306R-BLD	BE
5278	LGG	0	junction	5278	LGG
5318	LGG	42	junction	5318	LGG
5319	LGG	6	junction	5319	LGG
5395	LGG	38	junction	5395	LGG
5415	GBM	214	junction	5415	GBM
5454	KIRC	10	junction	5454	KIRC
5633	KIRC	10	junction	5633	KIRC
5635	KIRC	4	junction	5635	KIRC
5647	STAD	764	junction	5647	STAD
5651	GBM	362	junction	5651	GBM
5653075dfbef8dbf0fd2c89d49e162c3decfdf3b62db87ee57a7124937af2792	ESAD	168	junction	5653075dfbef8dbf0fd2c89d49e162c3decfdf3b62db87ee57a7124937af2792	ESAD
568-24690-177S-27--568-25075N-302T-BLD	BE	54	junction	568-24690-177S-27--568-25075N-302T-BLD	BE
568-24693-177S-30--568-25075N-302T-BLD	BE	24	junction	568-24693-177S-30--568-25075N-302T-BLD	BE
568-24888-191U-31--568-25075N-302T-BLD	BE	228	junction	568-24888-191U-31--568-25075N-302T-BLD	BE
5693	KIRC	16	junction	5693	KIRC
5695	KIRC	10	junction	5695	KIRC
5723	STAD	88	junction	5723	STAD
5724	STAD	316	junction	5724	STAD
5730	STAD	144	junction	5730	STAD
575-24541-32W-30--575-25019N-181R-BLD	BE	54	junction	575-24541-32W-30--575-25019N-181R-BLD	BE
575-25141-181R-28--575-25019N-181R-BLD	BE	18	junction	575-25141-181R-28--575-25019N-181R-BLD	BE
575-25147-181R-26--575-25019N-181R-BLD	BE	38	junction	575-25147-181R-26--575-25019N-181R-BLD	BE
575-25150-32W-32--575-25019N-181R-BLD	BE	26	junction	575-25150-32W-32--575-25019N-181R-BLD	BE
5799	STAD	262	junction	5799	STAD
57a0663fa71fd2018b62bf8a5a5090b31ca2a7bb834cf056d34a9ec8a9afdff8	ESAD	724	junction	57a0663fa71fd2018b62bf8a5a5090b31ca2a7bb834cf056d34a9ec8a9afdff8	ESAD
5870	LGG	6	junction	5870	LGG
5872	LGG	8	junction	5872	LGG
5874	LGG	6	junction	5874	LGG
5960	GBM	226	junction	5960	GBM
5964	LGG	6	junction	5964	LGG
5987	KIRC	2	junction	5987	KIRC
5a14b5248d76d98bda5dbcd1450b97ed6d6924045908299241f47080e057b505	ESAD	556	junction	5a14b5248d76d98bda5dbcd1450b97ed6d6924045908299241f47080e057b505	ESAD
5a6c12d7e4141588ba41e5a07c2fdf878a57510ea4957fddbe1ce88e51d57864	ESAD	416	junction	5a6c12d7e4141588ba41e5a07c2fdf878a57510ea4957fddbe1ce88e51d57864	ESAD
5b557890e45f2aabf992413035f27efd8083136ab3672325e68f00b2431b6c40	ESAD	394	junction	5b557890e45f2aabf992413035f27efd8083136ab3672325e68f00b2431b6c40	ESAD
5e49d3e75f5a5faefb000800dda151a99cb2efe29603c7437a4a234c88bbb383	ESAD	128	junction	5e49d3e75f5a5faefb000800dda151a99cb2efe29603c7437a4a234c88bbb383	ESAD
6093	KIRC	6	junction	6093	KIRC
6177	STAD	34	junction	6177	STAD
6186	LGG	48	junction	6186	LGG
623-24672-133N-36--623-24959N-133N-GST	BE	14	junction	623-24672-133N-36--623-24959N-133N-GST	BE
625721c0e551208d32de7879e3cb04bb5cfe7573266d5aec45e58e306e186c70	ESAD	396	junction	625721c0e551208d32de7879e3cb04bb5cfe7573266d5aec45e58e306e186c70	ESAD
626-24028-12X-34--626-25079N-194T-BLD	BE	126	junction	626-24028-12X-34--626-25079N-194T-BLD	BE
626-24780-238S-34--626-25079N-194T-BLD	BE	126	junction	626-24780-238S-34--626-25079N-194T-BLD	BE
62d006ea1569dae280707516235efbb551613e782526764b4698ad19e66e1177	ESAD	328	junction	62d006ea1569dae280707516235efbb551613e782526764b4698ad19e66e1177	ESAD
635-24037-159M-30--635-25080N-95V-BLD	BE	50	junction	635-24037-159M-30--635-25080N-95V-BLD	BE
635-24040-164S-33--635-25080N-95V-BLD	BE	34	junction	635-24040-164S-33--635-25080N-95V-BLD	BE
6375459929f5a6320351e3b8851211460359ccde0ca0d7e858aae8fdbdf77d73.2	ESAD	406	junction	6375459929f5a6320351e3b8851211460359ccde0ca0d7e858aae8fdbdf77d73.2	ESAD
6397	LGG	8	junction	6397	LGG
6407	LGG	42	junction	6407	LGG
6452	STAD	8	junction	6452	STAD
6519	STAD	412	junction	6519	STAD
6528	STAD	192	junction	6528	STAD
65563f8e715e1117c73623defb3159d94318f41306526f79f5ba6134f72a925a	ESAD	604	junction	65563f8e715e1117c73623defb3159d94318f41306526f79f5ba6134f72a925a	ESAD
660-24058-213R-33--660-25082N-213R-BLD	BE	298	junction	660-24058-213R-33--660-25082N-213R-BLD	BE
6665	LGG	202	junction	6665	LGG
6668	LGG	8	junction	6668	LGG
6669	LGG	2	junction	6669	LGG
66a2d0738fe38f5b696b89088016921a5ba68467844906a415ad9c13c23f3f82	ESAD	244	junction	66a2d0738fe38f5b696b89088016921a5ba68467844906a415ad9c13c23f3f82	ESAD
6729b31463a1e912fe4187556be5de212ee7150ff1bbe2a9fabe990ef988484e	ESAD	534	junction	6729b31463a1e912fe4187556be5de212ee7150ff1bbe2a9fabe990ef988484e	ESAD
6815	STAD	194	junction	6815	STAD
6822	STAD	820	junction	6822	STAD
6875	STAD	190	junction	6875	STAD
6904b15afae6c2a0b1db92b5722ae54d1806030063ff51e3454e76193b2a5191	ESAD	44	junction	6904b15afae6c2a0b1db92b5722ae54d1806030063ff51e3454e76193b2a5191	ESAD
69f1b2078352cbdee29724b705114ad434578dbfadf5a8df2f82fdf3cde3f72b	ESAD	116	junction	69f1b2078352cbdee29724b705114ad434578dbfadf5a8df2f82fdf3cde3f72b	ESAD
6bb03952b5468708a1d1544dab4e4d542a649c1429f2b8e38877c2bf1abac6d4	ESAD	412	junction	6bb03952b5468708a1d1544dab4e4d542a649c1429f2b8e38877c2bf1abac6d4	ESAD
6c53d8df4b1cabae706250c0eb7a58908a8f12cebf7812218513c0c4633e13c6	ESAD	216	junction	6c53d8df4b1cabae706250c0eb7a58908a8f12cebf7812218513c0c4633e13c6	ESAD
6e6ffd2fababfb900f63401a704f75dd8edd7e063f826d6da01789aa2df983d6	ESAD	502	junction	6e6ffd2fababfb900f63401a704f75dd8edd7e063f826d6da01789aa2df983d6	ESAD
6e8fdfbc1b6673a9e7f0753ee13f672156f7333fac3083316c7f2d2994019053	ESAD	104	junction	6e8fdfbc1b6673a9e7f0753ee13f672156f7333fac3083316c7f2d2994019053	ESAD
7009	LGG	4	junction	7009	LGG
70224ed441451a81fd89f696be5993bde735a85317aeeece976d443a155bb554	ESAD	426	junction	70224ed441451a81fd89f696be5993bde735a85317aeeece976d443a155bb554	ESAD
70224ed441451a81fd89f696be5993bde735a85317aeeece976d443a155bb554.2	ESAD	386	junction	70224ed441451a81fd89f696be5993bde735a85317aeeece976d443a155bb554.2	ESAD
7136	STAD	286	junction	7136	STAD
7264	LGG	12	junction	7264	LGG
729ae39c61839b5c6bb6d8ec86b4e41bd4073cc8fac262bd32732144b1608045	ESAD	112	junction	729ae39c61839b5c6bb6d8ec86b4e41bd4073cc8fac262bd32732144b1608045	ESAD
730015334ef3a709c18445d6ceb35becf86f4fc5635f6117c5ae1646ffea4aee	ESAD	468	junction	730015334ef3a709c18445d6ceb35becf86f4fc5635f6117c5ae1646ffea4aee	ESAD
7301	LGG	14	junction	7301	LGG
7304	LGG	54	junction	7304	LGG
736816540afbfc3e46000e6c943e77f13e5f3c8e590750374d0b01e94448df78	ESAD	136	junction	736816540afbfc3e46000e6c943e77f13e5f3c8e590750374d0b01e94448df78	ESAD
740-24247-138M-36--740-24960N-156N-GST	BE	250	junction	740-24247-138M-36--740-24960N-156N-GST	BE
740-24250-138M-33--740-24960N-156N-GST	BE	66	junction	740-24250-138M-33--740-24960N-156N-GST	BE
740-24253-156N-35--740-24960N-156N-GST	BE	212	junction	740-24253-156N-35--740-24960N-156N-GST	BE
740-24256-156N-33--740-24960N-156N-GST	BE	228	junction	740-24256-156N-33--740-24960N-156N-GST	BE
74854df07d95b6b1a2132579094fef3b8c13e8f81875e20143f4e19e49e5f446	ESAD	764	junction	74854df07d95b6b1a2132579094fef3b8c13e8f81875e20143f4e19e49e5f446	ESAD
7487	LGG	6	junction	7487	LGG
75ce1bd6dbaf2d4ca50f51e6c1f2a09f3275b080539a07ac7ed962ae72c5179f	ESAD	258	junction	75ce1bd6dbaf2d4ca50f51e6c1f2a09f3275b080539a07ac7ed962ae72c5179f	ESAD
7602	LGG	0	junction	7602	LGG
7675	LGG	62	junction	7675	LGG
7689	LGG	24	junction	7689	LGG
7695	LGG	2	junction	7695	LGG
772-24568-116N-34--772-24977N-116N-GST	BE	96	junction	772-24568-116N-34--772-24977N-116N-GST	BE
772-24571-116N-36--772-24977N-116N-GST	BE	106	junction	772-24571-116N-36--772-24977N-116N-GST	BE
772-24577-123K-35--772-24977N-116N-GST	BE	80	junction	772-24577-123K-35--772-24977N-116N-GST	BE
7722	STAD	42	junction	7722	STAD
779-24091-67M-31--779-21582N-67M-GST	BE	78	junction	779-24091-67M-31--779-21582N-67M-GST	BE
779-24094-67M-28--779-21582N-67M-GST	BE	114	junction	779-24094-67M-28--779-21582N-67M-GST	BE
77e647a05a7bc6591ccdaaab2bbdef656649418e52d8f02e6f7f5d63af2f50fb	ESAD	150	junction	77e647a05a7bc6591ccdaaab2bbdef656649418e52d8f02e6f7f5d63af2f50fb	ESAD
7806	STAD	132	junction	7806	STAD
7848bd725874b4f28f5c907834fab039f1c9489938a6d78b770e367be2973da9	ESAD	1090	junction	7848bd725874b4f28f5c907834fab039f1c9489938a6d78b770e367be2973da9	ESAD
7bc2eb9cbd76f57405c4db1820c587932da2dc3bc5396e612eaa68aec71f434d	ESAD	146	junction	7bc2eb9cbd76f57405c4db1820c587932da2dc3bc5396e612eaa68aec71f434d	ESAD
7c965565bb8202941bbc7995e015807e3817397353b46aed7fafd568ec445009	ESAD	1250	junction	7c965565bb8202941bbc7995e015807e3817397353b46aed7fafd568ec445009	ESAD
7e5fe54682f97841fdf2cea1ac5a3a9b0944e8de6a5bab414be5953e4a122203	ESAD	394	junction	7e5fe54682f97841fdf2cea1ac5a3a9b0944e8de6a5bab414be5953e4a122203	ESAD
8041	MALY	52	junction	8041	MALY
8042	MALY	302	junction	8042	MALY
8043	MALY	176	junction	8043	MALY
8047	MALY	78	junction	8047	MALY
806-24154-225T-37--806-25035N-53S-BLD	BE	24	junction	806-24154-225T-37--806-25035N-53S-BLD	BE
806-24157-70V-34--806-25035N-53S-BLD	BE	28	junction	806-24157-70V-34--806-25035N-53S-BLD	BE
8104	LGG	142	junction	8104	LGG
815b14fc82802994d6234dbab1f4acf7fd67c3a1dc2c7b23418c82c61f08e91e	ESAD	612	junction	815b14fc82802994d6234dbab1f4acf7fd67c3a1dc2c7b23418c82c61f08e91e	ESAD
8182	LGG	12	junction	8182	LGG
8245	STAD	132	junction	8245	STAD
826cb806c36242e06bda2a676b65446bc82ef365e10148aa36baec0b1afa872c	ESAD	356	junction	826cb806c36242e06bda2a676b65446bc82ef365e10148aa36baec0b1afa872c	ESAD
8323	KICH	54	junction	8323	KICH
8325	KICH	0	junction	8325	KICH
8327	KICH	0	junction	8327	KICH
8328	KICH	20	junction	8328	KICH
8330	KICH	0	junction	8330	KICH
8331	KICH	8	junction	8331	KICH
8332	KICH	0	junction	8332	KICH
8334	KICH	6	junction	8334	KICH
8337	KICH	0	junction	8337	KICH
8340	KICH	0	junction	8340	KICH
8341	KICH	358	junction	8341	KICH
8342	KICH	0	junction	8342	KICH
8343	KICH	2	junction	8343	KICH
8344	KICH	0	junction	8344	KICH
8346	KICH	4	junction	8346	KICH
8373	STAD	648	junction	8373	STAD
8381	STAD	22	junction	8381	STAD
83e5f80b1c797b84fc0cb2cd64de1f93ba161fc7250d6638f1cfcdbfd8cbb1b6	ESAD	166	junction	83e5f80b1c797b84fc0cb2cd64de1f93ba161fc7250d6638f1cfcdbfd8cbb1b6	ESAD
8406	KICH	4	junction	8406	KICH
8407	KICH	2	junction	8407	KICH
8410	KICH	2	junction	8410	KICH
8411	KICH	0	junction	8411	KICH
8416	KICH	2	junction	8416	KICH
8417	KICH	0	junction	8417	KICH
8418	KICH	8	junction	8418	KICH
8422	KICH	0	junction	8422	KICH
8424	KICH	12	junction	8424	KICH
8425	KICH	4	junction	8425	KICH
8426	KICH	26	junction	8426	KICH
8427	KICH	58	junction	8427	KICH
8428	KICH	42	junction	8428	KICH
8429	KICH	4	junction	8429	KICH
8430	KICH	16	junction	8430	KICH
8431	KICH	4	junction	8431	KICH
8432	KICH	0	junction	8432	KICH
8434	KICH	0	junction	8434	KICH
8435	KICH	128	junction	8435	KICH
8438	KICH	8	junction	8438	KICH
8440	KICH	0	junction	8440	KICH
8442	KICH	0	junction	8442	KICH
8443	KICH	416	junction	8443	KICH
8476	KICH	0	junction	8476	KICH
8477	KICH	0	junction	8477	KICH
85b73e9079e9cd6fd8efd465a1d7cb632075eebd61536049e6e3b9b3e2fd661a	ESAD	574	junction	85b73e9079e9cd6fd8efd465a1d7cb632075eebd61536049e6e3b9b3e2fd661a	ESAD
86c633a436916422e25c43063f1d8fde99dfbcb303747adcce0d3da8cc1c3183	ESAD	54	junction	86c633a436916422e25c43063f1d8fde99dfbcb303747adcce0d3da8cc1c3183	ESAD
875bfbff4c31a068c9824c557541698eea34f069a333d8aec6d2e6645a73d2fd	ESAD	378	junction	875bfbff4c31a068c9824c557541698eea34f069a333d8aec6d2e6645a73d2fd	ESAD
88-23692-18U-36--88-24991N-123S-BLD	BE	46	junction	88-23692-18U-36--88-24991N-123S-BLD	BE
88-23695-18U-35--88-24991N-123S-BLD	BE	62	junction	88-23695-18U-35--88-24991N-123S-BLD	BE
887c41c3bf89e0fe6d721f4407b024294f01af4937a412310681db9e9bb57e8c	ESAD	620	junction	887c41c3bf89e0fe6d721f4407b024294f01af4937a412310681db9e9bb57e8c	ESAD
891-24604-309R-31--891-25041N-75P-BLD	BE	170	junction	891-24604-309R-31--891-25041N-75P-BLD	BE
89bab9e7f417efbc02ba5fbf3fe14630c12cbbfde41420e1e822417f0ca843ad	ESAD	180	junction	89bab9e7f417efbc02ba5fbf3fe14630c12cbbfde41420e1e822417f0ca843ad	ESAD
8cf58ec6aefc914022d30014ad2091b33ec3a4ee841d22ed964ec8d7ff515e61	ESAD	300	junction	8cf58ec6aefc914022d30014ad2091b33ec3a4ee841d22ed964ec8d7ff515e61	ESAD
8debf2cb55d0f1b7011f183b83cc855caf6f06cbde5d34ff4449ac79b9f1abfb	ESAD	294	junction	8debf2cb55d0f1b7011f183b83cc855caf6f06cbde5d34ff4449ac79b9f1abfb	ESAD
8e4d0a4d30896e13a46ec1a156fd004b325aebb89e2a4bdcfce0d17f24356900	ESAD	556	junction	8e4d0a4d30896e13a46ec1a156fd004b325aebb89e2a4bdcfce0d17f24356900	ESAD
8eaf6e7cd7af4825a2dcaebc5dd3897ce05b6bc1e6b642e278059b92a8e3fe83	ESAD	304	junction	8eaf6e7cd7af4825a2dcaebc5dd3897ce05b6bc1e6b642e278059b92a8e3fe83	ESAD
8ec9d907cdf12c3184889dbeded8466994a0cf8ce6aa8dea3d74eb94eaa238cc	ESAD	236	junction	8ec9d907cdf12c3184889dbeded8466994a0cf8ce6aa8dea3d74eb94eaa238cc	ESAD
900fdae05c90e27aba521996cc05d0a83e32dec27c271a8f14e59fa84439ed34	ESAD	604	junction	900fdae05c90e27aba521996cc05d0a83e32dec27c271a8f14e59fa84439ed34	ESAD
909-24523-161W-36--909-25086N-9U-BLD	BE	24	junction	909-24523-161W-36--909-25086N-9U-BLD	BE
909-24529-41G-36--909-25086N-9U-BLD	BE	18	junction	909-24529-41G-36--909-25086N-9U-BLD	BE
909-24831-105U-35--909-25086N-9U-BLD	BE	20	junction	909-24831-105U-35--909-25086N-9U-BLD	BE
911-24619-11Y-25--911-25044N-6X-BLD	BE	16	junction	911-24619-11Y-25--911-25044N-6X-BLD	BE
913ce613b66ab4f7fda444db13933c39c689bef153aaa1cbe05db00e4aa7a1a4	ESAD	344	junction	913ce613b66ab4f7fda444db13933c39c689bef153aaa1cbe05db00e4aa7a1a4	ESAD
91b806330d0e632a29aac57bb4c22564728a6732fc25d7393a6075cc86ec86d8	ESAD	386	junction	91b806330d0e632a29aac57bb4c22564728a6732fc25d7393a6075cc86ec86d8	ESAD
929bd4be9261b766fed4e9b6eb5dc4ba79d4f9b74e9b2c36f23398835215b95a	ESAD	178	junction	929bd4be9261b766fed4e9b6eb5dc4ba79d4f9b74e9b2c36f23398835215b95a	ESAD
92e63aeec5d5bfb17bdf90ebb4da303a859f9d663ef931cdd8fc89ec4d807919	ESAD	62	junction	92e63aeec5d5bfb17bdf90ebb4da303a859f9d663ef931cdd8fc89ec4d807919	ESAD
932be781385ee8928b7497f31bc76e2d39794e65797f0afed7f025f46f63de04	ESAD	358	junction	932be781385ee8928b7497f31bc76e2d39794e65797f0afed7f025f46f63de04	ESAD
934fe84809fc20a81f124747d5ed57817eb0f9120ea63a69a1548d514710978f	ESAD	552	junction	934fe84809fc20a81f124747d5ed57817eb0f9120ea63a69a1548d514710978f	ESAD
942-24906-18X-38--942-25046N-166T-BLD	BE	12	junction	942-24906-18X-38--942-25046N-166T-BLD	BE
94c34e2475b3d421a3a49b49b8ef2fe278718a688445204887a53b76c720895e	ESAD	322	junction	94c34e2475b3d421a3a49b49b8ef2fe278718a688445204887a53b76c720895e	ESAD
954-24205-298T-35--954-25048N-259T-BLD	BE	236	junction	954-24205-298T-35--954-25048N-259T-BLD	BE
954-24208-298T-34--954-25048N-259T-BLD	BE	194	junction	954-24208-298T-34--954-25048N-259T-BLD	BE
954-24220-219U-34--954-25048N-259T-BLD	BE	176	junction	954-24220-219U-34--954-25048N-259T-BLD	BE
96abdb3df8257963934d256627e830afd34b535b61f1caff482994f8f85dbece	ESAD	484	junction	96abdb3df8257963934d256627e830afd34b535b61f1caff482994f8f85dbece	ESAD
97a8da910044868e4b93f3bc66de54f863428a22b72f8e8c8896d562f7c970c3	ESAD	38	junction	97a8da910044868e4b93f3bc66de54f863428a22b72f8e8c8896d562f7c970c3	ESAD
98011f8fb58fa8eed6171691d09d2ac7c67eb943046e45f70c47352c3a559887	ESAD	196	junction	98011f8fb58fa8eed6171691d09d2ac7c67eb943046e45f70c47352c3a559887	ESAD
995-24136-91W-31--995-25053N-119V-BLD	BE	200	junction	995-24136-91W-31--995-25053N-119V-BLD	BE
997-24592-142W-30--997-25054N-122V-BLD	BE	322	junction	997-24592-142W-30--997-25054N-122V-BLD	BE
997-24595-142W-33--997-25054N-122V-BLD	BE	288	junction	997-24595-142W-33--997-25054N-122V-BLD	BE
997-24598-184V-29--997-25054N-122V-BLD	BE	366	junction	997-24598-184V-29--997-25054N-122V-BLD	BE
997-24601-184V-32--997-25054N-122V-BLD	BE	340	junction	997-24601-184V-32--997-25054N-122V-BLD	BE
99febb5cb49a8d0e47fc43cb46c3c972af7077adde2b38b1919c294276ef563e	ESAD	326	junction	99febb5cb49a8d0e47fc43cb46c3c972af7077adde2b38b1919c294276ef563e	ESAD
9aa3acd19da6ad36a8206d2dc11b4e8f54a1ba392aa4ae6ef853a174f016ab8d	ESAD	64	junction	9aa3acd19da6ad36a8206d2dc11b4e8f54a1ba392aa4ae6ef853a174f016ab8d	ESAD
9bede39d73b7a98225f1f8ea85d513c1739d6c55a43f8b284a41a49ec0c9a9df	ESAD	164	junction	9bede39d73b7a98225f1f8ea85d513c1739d6c55a43f8b284a41a49ec0c9a9df	ESAD
A032	COAD	68	junction	A032	COAD
A051	UCEC	0	junction	A051	UCEC
A052	UCEC	368	junction	A052	UCEC
A053	UCEC	544	junction	A053	UCEC
A054	UCEC	2	junction	A054	UCEC
A05A	UCEC	472	junction	A05A	UCEC
A05D	UCEC	392	junction	A05D	UCEC
A07I	BRCA	830	junction	A07I	BRCA
A0C8	BLCA	322	junction	A0C8	BLCA
A0CA	UCEC	12	junction	A0CA	UCEC
A0CC	UCEC	312	junction	A0CC	UCEC
A0CE	BRCA	172	junction	A0CE	BRCA
A0D0	BRCA	634	junction	A0D0	BRCA
A0D4	BRCA	340	junction	A0D4	BRCA
A0G0	BRCA	120	junction	A0G0	BRCA
A0G9	UCEC	0	junction	A0G9	UCEC
A0GJ	UCEC	366	junction	A0GJ	UCEC
A0J1	UCEC	6	junction	A0J1	UCEC
A0JM	BRCA	564	junction	A0JM	BRCA
A0JN	UCEC	440	junction	A0JN	UCEC
A0K8	UCEC	230	junction	A0K8	UCEC
A0L8	UCEC	206	junction	A0L8	UCEC
A0L9	UCEC	418	junction	A0L9	UCEC
A0LD	UCEC	12	junction	A0LD	UCEC
A0LH	UCEC	208	junction	A0LH	UCEC
A0LO	UCEC	8	junction	A0LO	UCEC
A0TC	UCEC	6	junction	A0TC	UCEC
A0TD	UCEC	0	junction	A0TD	UCEC
A0TE	UCEC	86	junction	A0TE	UCEC
A0TN	CESC	82	junction	A0TN	CESC
A0V8	UCEC	464	junction	A0V8	UCEC
A0VL	CESC	78	junction	A0VL	CESC
A109	BRCA	612	junction	A109	BRCA
A11G	UCEC	38	junction	A11G	UCEC
A11H	UCEC	32	junction	A11H	UCEC
A12L	BRCA	1040	junction	A12L	BRCA
A13J	BLCA	244	junction	A13J	BLCA
A148	MELA	106	junction	A148	MELA
A152	BRCA	90	junction	A152	BRCA
A17K	UCEC	250	junction	A17K	UCEC
A18C	UCEC	44	junction	A18C	UCEC
A19D	MELA	30	junction	A19D	MELA
A1A5	BLCA	278	junction	A1A5	BLCA
A1A6	BLCA	390	junction	A1A6	BLCA
A1A7	BLCA	720	junction	A1A7	BLCA
A1AY	BRCA	148	junction	A1AY	BRCA
A1BF	CESC	30	junction	A1BF	CESC
A1BN	CESC	158	junction	A1BN	CESC
A1CI	UCEC	0	junction	A1CI	UCEC
A1GS	UCEC	326	junction	A1GS	UCEC
A1GW	UCEC	56	junction	A1GW	UCEC
A1I0	MELA	394	junction	A1I0	MELA
A1KW	SARC	1044	junction	A1KW	SARC
A1L0	SARC	3020	junction	A1L0	SARC
A1L2	SARC	1736	junction	A1L2	SARC
A1L3	SARC	956	junction	A1L3	SARC
A1LK	BRCA	372	junction	A1LK	BRCA
A1M8	CESC	72	junction	A1M8	CESC
A1M9	CESC	70	junction	A1M9	CESC
A1MI	CESC	52	junction	A1MI	CESC
A1ML	CESC	16	junction	A1ML	CESC
A1MY	UCEC	380	junction	A1MY	UCEC
A1NN	UCEC	256	junction	A1NN	UCEC
A1Q1	MELA	494	junction	A1Q1	MELA
A1Q5	MELA	100	junction	A1Q5	MELA
A1Y8	UCEC	360	junction	A1Y8	UCEC
A1ZD	MELA	352	junction	A1ZD	MELA
A1ZP	MELA	100	junction	A1ZP	MELA
A20P	BLCA	138	junction	A20P	BLCA
A20T	BLCA	118	junction	A20T	BLCA
A20V	BLCA	376	junction	A20V	BLCA
A240	SARC	728	junction	A240	SARC
A26L	UCEC	192	junction	A26L	UCEC
A27C	BLCA	44	junction	A27C	BLCA
A27F	BRCA	286	junction	A27F	BRCA
A29B	MELA	64	junction	A29B	MELA
A2C5	BLCA	214	junction	A2C5	BLCA
A2H5	UCEC	564	junction	A2H5	UCEC
A2HQ	BLCA	242	junction	A2HQ	BLCA
A2IZ	SARC	1640	junction	A2IZ	SARC
A2J0	SARC	1904	junction	A2J0	SARC
A2J4	SARC	910	junction	A2J4	SARC
A2KJ	CESC	144	junction	A2KJ	CESC
A2LA	BLCA	190	junction	A2LA	BLCA
A2LK	BRCA	54	junction	A2LK	BRCA
A2LT	CESC	50	junction	A2LT	CESC
A2LV	CESC	222	junction	A2LV	CESC
A2M5	MELA	30	junction	A2M5	MELA
A2PK	CESC	46	junction	A2PK	CESC
A2RL	CESC	66	junction	A2RL	CESC
A2RM	CESC	256	junction	A2RM	CESC
A3IL	BLCA	68	junction	A3IL	BLCA
A3K7	SARC	428	junction	A3K7	SARC
A3KA	SARC	538	junction	A3KA	SARC
A3LT	SARC	1256	junction	A3LT	SARC
A3LU	SARC	1108	junction	A3LU	SARC
A3LW	SARC	836	junction	A3LW	SARC
A3LY	SARC	1964	junction	A3LY	SARC
A3M1	SARC	3326	junction	A3M1	SARC
A3M4	SARC	62	junction	A3M4	SARC
A3M5	SARC	302	junction	A3M5	SARC
A3MF	BLCA	30	junction	A3MF	BLCA
A3N5	BLCA	114	junction	A3N5	BLCA
A3N6	BLCA	104	junction	A3N6	BLCA
A3NJ	SARC	26	junction	A3NJ	SARC
A3PH	BLCA	94	junction	A3PH	BLCA
A3PJ	BLCA	230	junction	A3PJ	BLCA
A3PN	SARC	42	junction	A3PN	SARC
A3RE	SARC	332	junction	A3RE	SARC
A3U5	SARC	1388	junction	A3U5	SARC
A3U6	SARC	416	junction	A3U6	SARC
A3U7	SARC	458	junction	A3U7	SARC
A3XL	BRCA	768	junction	A3XL	BRCA
A40Y	KIRP	52	junction	A40Y	KIRP
A43Z	SARC	344	junction	A43Z	SARC
A44B	KIRP	76	junction	A44B	KIRP
A47M	KIRP	2	junction	A47M	KIRP
A47R	SARC	74	junction	A47R	SARC
A48G	SARC	296	junction	A48G	SARC
A48U	SARC	48	junction	A48U	SARC
A4AJ	SARC	66	junction	A4AJ	SARC
A4EI	SARC	42	junction	A4EI	SARC
A4EK	SARC	10	junction	A4EK	SARC
A4G6	STAD	54	junction	A4G6	STAD
A4YX	STAD	130	junction	A4YX	STAD
A4ZT	KIRP	4	junction	A4ZT	KIRP
A560	KIRP	0	junction	A560	KIRP
A57E	KIRP	64	junction	A57E	KIRP
A5DJ	KIRP	146	junction	A5DJ	KIRP
A5NI	KIRP	0	junction	A5NI	KIRP
A5NJ	KIRP	12	junction	A5NJ	KIRP
A5NL	KIRP	0	junction	A5NL	KIRP
A5R7	LGG	114	junction	A5R7	LGG
A5W3	SARC	90	junction	A5W3	SARC
A61B	LGG	560	junction	A61B	LGG
A6IA	SARC	470	junction	A6IA	SARC
A6Z2	SARC	80	junction	A6Z2	SARC
A7RK	LGG	66	junction	A7RK	LGG
A7RV	LGG	112	junction	A7RV	LGG
A95T	SARC	92	junction	A95T	SARC
A9GB	SARC	322	junction	A9GB	SARC
EGAN00001000368_EGAN00001000372	BRCA	34	junction	EGAN00001000368_EGAN00001000372	BRCA
EGAN00001000386_EGAN00001000380	BRCA	186	junction	EGAN00001000386_EGAN00001000380	BRCA
EGAN00001000588_EGAN00001000589	BRCA	98	junction	EGAN00001000588_EGAN00001000589	BRCA
EGAN00001000592_EGAN00001000593	BRCA	308	junction	EGAN00001000592_EGAN00001000593	BRCA
EGAN00001000594_EGAN00001000595	BRCA	1256	junction	EGAN00001000594_EGAN00001000595	BRCA
EGAN00001000596_EGAN00001000597	BRCA	540	junction	EGAN00001000596_EGAN00001000597	BRCA
EGAN00001000745_EGAN00001000746	BRCA	114	junction	EGAN00001000745_EGAN00001000746	BRCA
EGAN00001001177_EGAN00001000752	BRCA	444	junction	EGAN00001001177_EGAN00001000752	BRCA
EGAN00001018603_EGAN00001018604	BRCA	526	junction	EGAN00001018603_EGAN00001018604	BRCA
EGAN00001018607_EGAN00001018608	BRCA	348	junction	EGAN00001018607_EGAN00001018608	BRCA
EGAN00001018611_EGAN00001018612	BRCA	480	junction	EGAN00001018611_EGAN00001018612	BRCA
EGAN00001030465_EGAN00001030466	BRCA	694	junction	EGAN00001030465_EGAN00001030466	BRCA
EGAN00001030469_EGAN00001030470	BRCA	502	junction	EGAN00001030469_EGAN00001030470	BRCA
EGAN00001030778_EGAN00001030894	BRCA	90	junction	EGAN00001030778_EGAN00001030894	BRCA
EGAN00001030890_EGAN00001030891	BRCA	466	junction	EGAN00001030890_EGAN00001030891	BRCA
EGAN00001030897_EGAN00001030898	BRCA	42	junction	EGAN00001030897_EGAN00001030898	BRCA
EGAN00001036482_EGAN00001036483	BRCA	146	junction	EGAN00001036482_EGAN00001036483	BRCA
EGAN00001269437_EGAN00001269438	BRCA	2	junction	EGAN00001269437_EGAN00001269438	BRCA
EGAN00001269439_EGAN00001269440	BRCA	82	junction	EGAN00001269439_EGAN00001269440	BRCA
EGAN00001269441_EGAN00001269442	BRCA	744	junction	EGAN00001269441_EGAN00001269442	BRCA
EGAN00001269443_EGAN00001269444	BRCA	0	junction	EGAN00001269443_EGAN00001269444	BRCA
EGAN00001269445_EGAN00001269446	BRCA	526	junction	EGAN00001269445_EGAN00001269446	BRCA
EGAN00001269459_EGAN00001269460	BRCA	26	junction	EGAN00001269459_EGAN00001269460	BRCA
EGAN00001269463_EGAN00001269464	BRCA	550	junction	EGAN00001269463_EGAN00001269464	BRCA
EGAN00001269467_EGAN00001269468	BRCA	0	junction	EGAN00001269467_EGAN00001269468	BRCA
EGAN00001269469_EGAN00001269470	BRCA	16	junction	EGAN00001269469_EGAN00001269470	BRCA
EGAN00001269473_EGAN00001269474	BRCA	222	junction	EGAN00001269473_EGAN00001269474	BRCA
EGAN00001269475_EGAN00001269476	BRCA	268	junction	EGAN00001269475_EGAN00001269476	BRCA
EGAN00001269483_EGAN00001269484	BRCA	298	junction	EGAN00001269483_EGAN00001269484	BRCA
EGAN00001269485_EGAN00001269486	BRCA	326	junction	EGAN00001269485_EGAN00001269486	BRCA
EGAN00001269493_EGAN00001269494	BRCA	376	junction	EGAN00001269493_EGAN00001269494	BRCA
EGAN00001269497_EGAN00001269498	BRCA	20	junction	EGAN00001269497_EGAN00001269498	BRCA
EGAN00001269503_EGAN00001269504	BRCA	38	junction	EGAN00001269503_EGAN00001269504	BRCA
EGAN00001269505_EGAN00001269506	BRCA	312	junction	EGAN00001269505_EGAN00001269506	BRCA
EGAN00001269509_EGAN00001269510	BRCA	6	junction	EGAN00001269509_EGAN00001269510	BRCA
EGAN00001269511_EGAN00001269512	BRCA	176	junction	EGAN00001269511_EGAN00001269512	BRCA
EGAN00001269521_EGAN00001269522	BRCA	4	junction	EGAN00001269521_EGAN00001269522	BRCA
EGAN00001269523_EGAN00001269524	BRCA	130	junction	EGAN00001269523_EGAN00001269524	BRCA
EGAN00001269525_EGAN00001269526	BRCA	22	junction	EGAN00001269525_EGAN00001269526	BRCA
EGAN00001269527_EGAN00001269528	BRCA	394	junction	EGAN00001269527_EGAN00001269528	BRCA
EGAN00001269531_EGAN00001269532	BRCA	420	junction	EGAN00001269531_EGAN00001269532	BRCA
EGAN00001269533_EGAN00001269534	BRCA	0	junction	EGAN00001269533_EGAN00001269534	BRCA
EGAN00001269543_EGAN00001269544	BRCA	4	junction	EGAN00001269543_EGAN00001269544	BRCA
EGAN00001269547_EGAN00001269548	BRCA	16	junction	EGAN00001269547_EGAN00001269548	BRCA
EGAN00001269549_EGAN00001269550	BRCA	800	junction	EGAN00001269549_EGAN00001269550	BRCA
EGAN00001269551_EGAN00001269552	BRCA	402	junction	EGAN00001269551_EGAN00001269552	BRCA
EGAN00001269553_EGAN00001269554	BRCA	10	junction	EGAN00001269553_EGAN00001269554	BRCA
EGAN00001269561_EGAN00001269562	BRCA	136	junction	EGAN00001269561_EGAN00001269562	BRCA
EGAN00001269565_EGAN00001269566	BRCA	480	junction	EGAN00001269565_EGAN00001269566	BRCA
EGAN00001269567_EGAN00001269568	BRCA	4	junction	EGAN00001269567_EGAN00001269568	BRCA
EGAN00001269569_EGAN00001269570	BRCA	370	junction	EGAN00001269569_EGAN00001269570	BRCA
EGAN00001269575_EGAN00001269576	BRCA	178	junction	EGAN00001269575_EGAN00001269576	BRCA
EGAN00001269577_EGAN00001269578	BRCA	194	junction	EGAN00001269577_EGAN00001269578	BRCA
EGAN00001269579_EGAN00001269580	BRCA	222	junction	EGAN00001269579_EGAN00001269580	BRCA
EGAN00001269581_EGAN00001269582	BRCA	910	junction	EGAN00001269581_EGAN00001269582	BRCA
EGAN00001269583_EGAN00001269584	BRCA	14	junction	EGAN00001269583_EGAN00001269584	BRCA
EGAN00001269589_EGAN00001269590	BRCA	56	junction	EGAN00001269589_EGAN00001269590	BRCA
EGAN00001269593_EGAN00001269594	BRCA	120	junction	EGAN00001269593_EGAN00001269594	BRCA
EGAN00001269603_EGAN00001269604	BRCA	286	junction	EGAN00001269603_EGAN00001269604	BRCA
EGAN00001269605_EGAN00001269606	BRCA	362	junction	EGAN00001269605_EGAN00001269606	BRCA
EGAN00001269607_EGAN00001269608	BRCA	220	junction	EGAN00001269607_EGAN00001269608	BRCA
EGAN00001269609_EGAN00001269610	BRCA	118	junction	EGAN00001269609_EGAN00001269610	BRCA
EGAN00001269613_EGAN00001269614	BRCA	460	junction	EGAN00001269613_EGAN00001269614	BRCA
EGAN00001269621_EGAN00001269622	BRCA	176	junction	EGAN00001269621_EGAN00001269622	BRCA
EGAN00001269627_EGAN00001269628	BRCA	898	junction	EGAN00001269627_EGAN00001269628	BRCA
EGAN00001269629_EGAN00001269630	BRCA	60	junction	EGAN00001269629_EGAN00001269630	BRCA
EGAN00001269631_EGAN00001269632	BRCA	742	junction	EGAN00001269631_EGAN00001269632	BRCA
LU-42	LUAD	0	junction	LU-42	LUAD
LU-69	LUAD	466	junction	LU-69	LUAD
LU-89	LUAD	20	junction	LU-89	LUAD
LU-F13	LUAD	38	junction	LU-F13	LUAD
LU-F2	LUAD	6	junction	LU-F2	LUAD
LU-F6	LUAD	2	junction	LU-F6	LUAD
LU-FF24	LUAD	294	junction	LU-FF24	LUAD
LU-FF34	LUAD	4	junction	LU-FF34	LUAD
LU-FF37	LUAD	30	junction	LU-FF37	LUAD
LU-FF4	LUAD	128	junction	LU-FF4	LUAD
LU-FF58	LUAD	2	junction	LU-FF58	LUAD
LU-FF62	LUAD	284	junction	LU-FF62	LUAD
LU-FF67	LUAD	8	junction	LU-FF67	LUAD
LU-FF71	LUAD	0	junction	LU-FF71	LUAD
LU-FF77	LUAD	56	junction	LU-FF77	LUAD
LU-FF78	LUAD	72	junction	LU-FF78	LUAD
MELA_0001	MELA	708	junction	MELA_0001	MELA
MELA_0002	MELA	1308	junction	MELA_0002	MELA
MELA_0003	MELA	2172	junction	MELA_0003	MELA
MELA_0004	MELA	530	junction	MELA_0004	MELA
MELA_0005	MELA	408	junction	MELA_0005	MELA
MELA_0006	MELA	80	junction	MELA_0006	MELA
MELA_0007	MELA	648	junction	MELA_0007	MELA
MELA_0008	MELA	234	junction	MELA_0008	MELA
MELA_0010	MELA	886	junction	MELA_0010	MELA
MELA_0011	MELA	96	junction	MELA_0011	MELA
MELA_0012	MELA	916	junction	MELA_0012	MELA
MELA_0014	MELA	1492	junction	MELA_0014	MELA
MELA_0015	MELA	384	junction	MELA_0015	MELA
MELA_0016	MELA	46	junction	MELA_0016	MELA
MELA_0022	MELA	100	junction	MELA_0022	MELA
MELA_0028	MELA	140	junction	MELA_0028	MELA
MELA_0029	MELA	34	junction	MELA_0029	MELA
MELA_0030	MELA	1226	junction	MELA_0030	MELA
MELA_0034	MELA	36	junction	MELA_0034	MELA
MELA_0035	MELA	44	junction	MELA_0035	MELA
MELA_0037	MELA	80	junction	MELA_0037	MELA
MELA_0039	MELA	8	junction	MELA_0039	MELA
MELA_0041	MELA	82	junction	MELA_0041	MELA
MELA_0043	MELA	200	junction	MELA_0043	MELA
MELA_0044	MELA	166	junction	MELA_0044	MELA
MELA_0047	MELA	88	junction	MELA_0047	MELA
MELA_0048	MELA	816	junction	MELA_0048	MELA
MELA_0049	MELA	130	junction	MELA_0049	MELA
MELA_0050	MELA	158	junction	MELA_0050	MELA
MELA_0052	MELA	150	junction	MELA_0052	MELA
MELA_0055	MELA	54	junction	MELA_0055	MELA
MELA_0057	MELA	340	junction	MELA_0057	MELA
MELA_0058	MELA	100	junction	MELA_0058	MELA
MELA_0059	MELA	2052	junction	MELA_0059	MELA
MELA_0061	MELA	178	junction	MELA_0061	MELA
MELA_0063	MELA	4	junction	MELA_0063	MELA
MELA_0064	MELA	672	junction	MELA_0064	MELA
MELA_0065	MELA	916	junction	MELA_0065	MELA
MELA_0067	MELA	1248	junction	MELA_0067	MELA
MELA_0068	MELA	274	junction	MELA_0068	MELA
MELA_0069	MELA	750	junction	MELA_0069	MELA
MELA_0070	MELA	742	junction	MELA_0070	MELA
MELA_0071	MELA	1800	junction	MELA_0071	MELA
MELA_0072	MELA	600	junction	MELA_0072	MELA
MELA_0075	MELA	72	junction	MELA_0075	MELA
MELA_0076	MELA	82	junction	MELA_0076	MELA
MELA_0078	MELA	50	junction	MELA_0078	MELA
MELA_0080	MELA	46	junction	MELA_0080	MELA
MELA_0081	MELA	1486	junction	MELA_0081	MELA
MELA_0082	MELA	48	junction	MELA_0082	MELA
MELA_0083	MELA	94	junction	MELA_0083	MELA
MELA_0098	MELA	232	junction	MELA_0098	MELA
MELA_0102	MELA	166	junction	MELA_0102	MELA
MELA_0103	MELA	230	junction	MELA_0103	MELA
MELA_0104	MELA	52	junction	MELA_0104	MELA
MELA_0105	MELA	140	junction	MELA_0105	MELA
MELA_0107	MELA	548	junction	MELA_0107	MELA
MELA_0108	MELA	40	junction	MELA_0108	MELA
MELA_0110	MELA	100	junction	MELA_0110	MELA
MELA_0114	MELA	130	junction	MELA_0114	MELA
MELA_0116	MELA	150	junction	MELA_0116	MELA
MELA_0118	MELA	206	junction	MELA_0118	MELA
MELA_0119	MELA	108	junction	MELA_0119	MELA
MELA_0121	MELA	324	junction	MELA_0121	MELA
MELA_0122	MELA	108	junction	MELA_0122	MELA
MELA_0135	MELA	370	junction	MELA_0135	MELA
MELA_0160	MELA	164	junction	MELA_0160	MELA
MELA_0161	MELA	32	junction	MELA_0161	MELA
MELA_0163	MELA	236	junction	MELA_0163	MELA
MELA_0164	MELA	456	junction	MELA_0164	MELA
MELA_0166	MELA	320	junction	MELA_0166	MELA
MELA_0167	MELA	616	junction	MELA_0167	MELA
MELA_0168	MELA	86	junction	MELA_0168	MELA
MELA_0170	MELA	142	junction	MELA_0170	MELA
MELA_0174	MELA	184	junction	MELA_0174	MELA
MELA_0176	MELA	196	junction	MELA_0176	MELA
MELA_0177	MELA	128	junction	MELA_0177	MELA
MELA_0178	MELA	166	junction	MELA_0178	MELA
MELA_0179	MELA	62	junction	MELA_0179	MELA
MELA_0181	MELA	824	junction	MELA_0181	MELA
MELA_0182	MELA	60	junction	MELA_0182	MELA
MELA_0183	MELA	142	junction	MELA_0183	MELA
MELA_0185	MELA	106	junction	MELA_0185	MELA
MELA_0187	MELA	634	junction	MELA_0187	MELA
MELA_0188	MELA	68	junction	MELA_0188	MELA
MELA_0190	MELA	42	junction	MELA_0190	MELA
MELA_0192	MELA	86	junction	MELA_0192	MELA
MELA_0193	MELA	442	junction	MELA_0193	MELA
MELA_0195	MELA	94	junction	MELA_0195	MELA
MELA_0196	MELA	160	junction	MELA_0196	MELA
MELA_0197	MELA	66	junction	MELA_0197	MELA
MELA_0199	MELA	56	junction	MELA_0199	MELA
MELA_0201	MELA	140	junction	MELA_0201	MELA
MELA_0202	MELA	212	junction	MELA_0202	MELA
MELA_0203	MELA	58	junction	MELA_0203	MELA
MELA_0204	MELA	236	junction	MELA_0204	MELA
MELA_0205	MELA	42	junction	MELA_0205	MELA
MELA_0206	MELA	826	junction	MELA_0206	MELA
MELA_0207	MELA	98	junction	MELA_0207	MELA
MELA_0210	MELA	42	junction	MELA_0210	MELA
MELA_0211	MELA	60	junction	MELA_0211	MELA
MELA_0212	MELA	86	junction	MELA_0212	MELA
MELA_0214	MELA	116	junction	MELA_0214	MELA
MELA_0215	MELA	94	junction	MELA_0215	MELA
MELA_0216	MELA	46	junction	MELA_0216	MELA
MELA_0218	MELA	0	junction	MELA_0218	MELA
MELA_0220	MELA	36	junction	MELA_0220	MELA
MELA_0221	MELA	580	junction	MELA_0221	MELA
MELA_0222	MELA	0	junction	MELA_0222	MELA
MELA_0223	MELA	210	junction	MELA_0223	MELA
MELA_0225	MELA	554	junction	MELA_0225	MELA
MELA_0227	MELA	120	junction	MELA_0227	MELA
MELA_0230	MELA	836	junction	MELA_0230	MELA
MELA_0231	MELA	2212	junction	MELA_0231	MELA
MELA_0232	MELA	50	junction	MELA_0232	MELA
MELA_0234	MELA	186	junction	MELA_0234	MELA
MELA_0236	MELA	38	junction	MELA_0236	MELA
MELA_0237	MELA	76	junction	MELA_0237	MELA
MELA_0238	MELA	174	junction	MELA_0238	MELA
MELA_0239	MELA	164	junction	MELA_0239	MELA
MELA_0240	MELA	112	junction	MELA_0240	MELA
MELA_0243	MELA	102	junction	MELA_0243	MELA
MELA_0244	MELA	82	junction	MELA_0244	MELA
MELA_0250	MELA	100	junction	MELA_0250	MELA
MELA_0251	MELA	126	junction	MELA_0251	MELA
MELA_0253	MELA	160	junction	MELA_0253	MELA
MELA_0254	MELA	380	junction	MELA_0254	MELA
MELA_0255	MELA	140	junction	MELA_0255	MELA
MELA_0256	MELA	160	junction	MELA_0256	MELA
MELA_0257	MELA	42	junction	MELA_0257	MELA
MELA_0261	MELA	170	junction	MELA_0261	MELA
MELA_0262	MELA	100	junction	MELA_0262	MELA
P01-28	PRAD	132	junction	P01-28	PRAD
P03-1426	PRAD	182	junction	P03-1426	PRAD
P05-3852	PRAD	142	junction	P05-3852	PRAD
P07-5021	PRAD	50	junction	P07-5021	PRAD
P07-837	PRAD	424	junction	P07-837	PRAD
P08-1042	PRAD	68	junction	P08-1042	PRAD
P08-1541	PRAD	186	junction	P08-1541	PRAD
P08-217	PRAD	36	junction	P08-217	PRAD
P08-501	PRAD	64	junction	P08-501	PRAD
P08-5852	PRAD	30	junction	P08-5852	PRAD
P08-716	PRAD	148	junction	P08-716	PRAD
P09-396	PRAD	0	junction	P09-396	PRAD
P09-628	PRAD	86	junction	P09-628	PRAD
P09-730	PRAD	14	junction	P09-730	PRAD
PM1002-Z1-1	PRAD	2114	junction	PM1002-Z1-1	PRAD
PM1177-Z1-1	PRAD	266	junction	PM1177-Z1-1	PRAD
PM12-Z10-1	PRAD	100	junction	PM12-Z10-1	PRAD
PM1230-Z1	COAD	102	junction	PM1230-Z1	COAD
PM1301-Z1	GBM	462	junction	PM1301-Z1	GBM
PM1341-Z2	PACA	430	junction	PM1341-Z2	PACA
PM1388-Brain	PRAD	64	junction	PM1388-Brain	PRAD
PM1411-X1-1	PRAD	102	junction	PM1411-X1-1	PRAD
PM1462-Z1	PACA	182	junction	PM1462-Z1	PACA
PM1570-Z1-1	PRAD	88	junction	PM1570-Z1-1	PRAD
PM159-Z1-1	PRAD	442	junction	PM159-Z1-1	PRAD
PM159-Z6-1	PRAD	478	junction	PM159-Z6-1	PRAD
PM159-Z7-1	PRAD	452	junction	PM159-Z7-1	PRAD
PM316-Z17	KIRC	220	junction	PM316-Z17	KIRC
PM322-Z5-1	PRAD	538	junction	PM322-Z5-1	PRAD
PM63-Z3-1	PRAD	584	junction	PM63-Z3-1	PRAD
PM63-Z6-1	PRAD	582	junction	PM63-Z6-1	PRAD
PM631-Z1	STAD	66	junction	PM631-Z1	STAD
PM650-Z1	PRAD	134	junction	PM650-Z1	PRAD
PM677-Z12-1	PRAD	416	junction	PM677-Z12-1	PRAD
PM677-Z16-1	PRAD	406	junction	PM677-Z16-1	PRAD
PM677-Z7-1	PRAD	440	junction	PM677-Z7-1	PRAD
PM677-Z9-1	PRAD	434	junction	PM677-Z9-1	PRAD
PM692-Z3-1	GBM	138	junction	PM692-Z3-1	GBM
PM748-Z26-1	BLCA	36	junction	PM748-Z26-1	BLCA
PM773-X1	PACA	114	junction	PM773-X1	PACA
PM846-Z2-1	GBM	246	junction	PM846-Z2-1	GBM
PM861-Z5-1	PRAD	286	junction	PM861-Z5-1	PRAD
PM877-Z2-1	GBM	174	junction	PM877-Z2-1	GBM
PM883-Z2-1	GBM	80	junction	PM883-Z2-1	GBM
PM884-Z13-1	GBM	40	junction	PM884-Z13-1	GBM
PM90-Z1-1	PRAD	208	junction	PM90-Z1-1	PRAD
PM90-Z19-1	PRAD	28	junction	PM90-Z19-1	PRAD
PM919-Z2-1	LGG	40	junction	PM919-Z2-1	LGG
PM922-Z2	KIRP	978	junction	PM922-Z2	KIRP
PM935-Z1-1	GBM	218	junction	PM935-Z1-1	GBM
PM948-Z4-1	LGG	166	junction	PM948-Z4-1	LGG
PM992-X1-1	PRAD	654	junction	PM992-X1-1	PRAD
PR-03-3125	PRAD	108	junction	PR-03-3125	PRAD
PR-03-728	PRAD	0	junction	PR-03-728	PRAD
PR-04-1243	PRAD	166	junction	PR-04-1243	PRAD
PR-0410	PRAD	0	junction	PR-0410	PRAD
PR-05-3595	PRAD	92	junction	PR-05-3595	PRAD
PR-06-1749	PRAD	464	junction	PR-06-1749	PRAD
PR-07-3258	PRAD	20	junction	PR-07-3258	PRAD
PR-07-4610	PRAD	126	junction	PR-07-4610	PRAD
PR-08-2153	PRAD	80	junction	PR-08-2153	PRAD
PR-08-4154	PRAD	54	junction	PR-08-4154	PRAD
PR-08-784	PRAD	24	junction	PR-08-784	PRAD
PR-09-146	PRAD	30	junction	PR-09-146	PRAD
PR-2741	PRAD	96	junction	PR-2741	PRAD
PR-3042	PRAD	874	junction	PR-3042	PRAD
PR-4240	PRAD	474	junction	PR-4240	PRAD
PR-7520	PRAD	368	junction	PR-7520	PRAD
PR-STID0000000415	PRAD	94	junction	PR-STID0000000415	PRAD
PR-STID0000002872	PRAD	6	junction	PR-STID0000002872	PRAD
a293752317dee4bd4904cb5d2a081581e8472f6445709fb2c0f45ee85217990d	ESAD	320	junction	a293752317dee4bd4904cb5d2a081581e8472f6445709fb2c0f45ee85217990d	ESAD
a46434e58a34e0e99f630629c94f09d33e002444d02c39269165de26d985718d	ESAD	382	junction	a46434e58a34e0e99f630629c94f09d33e002444d02c39269165de26d985718d	ESAD
a575fa3a084b236bdcc6c02c119e643d4bdd9cb84bcac4716fca07bc2b74fcf1	ESAD	332	junction	a575fa3a084b236bdcc6c02c119e643d4bdd9cb84bcac4716fca07bc2b74fcf1	ESAD
a5cf51cebbb267ad48366801701eb3a8ec788f9ecff83b6635df09eff4c4a13d	ESAD	510	junction	a5cf51cebbb267ad48366801701eb3a8ec788f9ecff83b6635df09eff4c4a13d	ESAD
a624a0c1c1913bae5bbae8811ee75a6c5150308de7321ab7ac13247677335bfa	ESAD	328	junction	a624a0c1c1913bae5bbae8811ee75a6c5150308de7321ab7ac13247677335bfa	ESAD
a6d223164cca3826d327c57ac731da9f25584747d5f07781052aff2443d4ab2e	ESAD	230	junction	a6d223164cca3826d327c57ac731da9f25584747d5f07781052aff2443d4ab2e	ESAD
a8abb113e589e360a9aaa31db4883f56206e49bc70b6d3577eb4736ba40018d7	ESAD	412	junction	a8abb113e589e360a9aaa31db4883f56206e49bc70b6d3577eb4736ba40018d7	ESAD
a968458c4aa5fb6e51d777b44f5fd8f0c563732d2c2a7ec5dc93cd5f8695407a	ESAD	276	junction	a968458c4aa5fb6e51d777b44f5fd8f0c563732d2c2a7ec5dc93cd5f8695407a	ESAD
aa65a09b407bbeb0954d4632fd062dd8487c6fd8cdcfbc6ee25213fbe40f184c	ESAD	470	junction	aa65a09b407bbeb0954d4632fd062dd8487c6fd8cdcfbc6ee25213fbe40f184c	ESAD
ababdefc84d79651cc5cbee04223ebff2d3479f79542ab018ed7dd62c21fbb06	ESAD	448	junction	ababdefc84d79651cc5cbee04223ebff2d3479f79542ab018ed7dd62c21fbb06	ESAD
ad911862aca0a6b42d094875b3135f5a8e850ce1a11394dca9913cda419fe972	ESAD	428	junction	ad911862aca0a6b42d094875b3135f5a8e850ce1a11394dca9913cda419fe972	ESAD
af2e66fc3118bd5100b0d503caedda230b2b515a097537f873cd0190a115d44f	ESAD	446	junction	af2e66fc3118bd5100b0d503caedda230b2b515a097537f873cd0190a115d44f	ESAD
b095be882857633de948faf0619072298aa64461fd058af02352f8961c273320	ESAD	216	junction	b095be882857633de948faf0619072298aa64461fd058af02352f8961c273320	ESAD
b1e3464f5718a6c674ee1a8da4a92ab7cc4f892e1b2e7a25cc7401f5c734124e	ESAD	398	junction	b1e3464f5718a6c674ee1a8da4a92ab7cc4f892e1b2e7a25cc7401f5c734124e	ESAD
b83276e275db581581238ffb61e2680ef11a9bb54ad19bc8f70fbee175d10b5d	ESAD	210	junction	b83276e275db581581238ffb61e2680ef11a9bb54ad19bc8f70fbee175d10b5d	ESAD
b8b7637a8d22837847d02df6a4587bd93fcd2c9ed21ef04893336f3c7dd6ddba	ESAD	712	junction	b8b7637a8d22837847d02df6a4587bd93fcd2c9ed21ef04893336f3c7dd6ddba	ESAD
b8bfd29057a30c787f3ce32ad6fd64aeb349043a52c25d917cb28644bc0a48a0	ESAD	202	junction	b8bfd29057a30c787f3ce32ad6fd64aeb349043a52c25d917cb28644bc0a48a0	ESAD
bb12d9bb26703270e2fcfbff31177ae565874daf2528647fedd249b6c2935cf2	ESAD	454	junction	bb12d9bb26703270e2fcfbff31177ae565874daf2528647fedd249b6c2935cf2	ESAD
bd8b41d77f905bd068f01e8ac5dc0b7ef04d8ac2215d4154c0738348b8918278	ESAD	312	junction	bd8b41d77f905bd068f01e8ac5dc0b7ef04d8ac2215d4154c0738348b8918278	ESAD
be676cca94bc8602cb0eef47fafa62ae3665d31d7eae696604c0b2d1c11a4cbd	ESAD	210	junction	be676cca94bc8602cb0eef47fafa62ae3665d31d7eae696604c0b2d1c11a4cbd	ESAD
be968792772699a12e22c87670fa3f80e7c142271bdd98b62f4fb62f8fd4595c	ESAD	870	junction	be968792772699a12e22c87670fa3f80e7c142271bdd98b62f4fb62f8fd4595c	ESAD
c4576ef6950092fd647b7e0ccdf5e46cbfa3da5648f93f5e8c40f76bbf59fad3	ESAD	94	junction	c4576ef6950092fd647b7e0ccdf5e46cbfa3da5648f93f5e8c40f76bbf59fad3	ESAD
c4577b94393c6a47c5033065ba9a879329432ceb9cb8b6ee590c9023e0c9efb5	ESAD	250	junction	c4577b94393c6a47c5033065ba9a879329432ceb9cb8b6ee590c9023e0c9efb5	ESAD
c6872050642efc50838c33494a3f26c7a912efcda4b2d355306aab91b8a77db4	ESAD	242	junction	c6872050642efc50838c33494a3f26c7a912efcda4b2d355306aab91b8a77db4	ESAD
c72589bc8e2b3e3e7373fbf0b5adb4c67dfb65afa28950d68bc08e94b4e5f6e6	ESAD	216	junction	c72589bc8e2b3e3e7373fbf0b5adb4c67dfb65afa28950d68bc08e94b4e5f6e6	ESAD
c8520defc94e82f4984f47e47d452a9d06d0643704636037feb2782a757df487	ESAD	700	junction	c8520defc94e82f4984f47e47d452a9d06d0643704636037feb2782a757df487	ESAD
c92b6c3dc5d7ab373cca89e4261a451f1a5d86b4d5bc05d7136fabb995f4d353	ESAD	60	junction	c92b6c3dc5d7ab373cca89e4261a451f1a5d86b4d5bc05d7136fabb995f4d353	ESAD
ca5d2c19174791eda451f1994223b4c5b78a668e5b135230f5149eb7d65a97d3	ESAD	246	junction	ca5d2c19174791eda451f1994223b4c5b78a668e5b135230f5149eb7d65a97d3	ESAD
ca7711a3704bf6c3c53c8da9151d70fb1b412e52dab8a03e3380611d9669e750	ESAD	296	junction	ca7711a3704bf6c3c53c8da9151d70fb1b412e52dab8a03e3380611d9669e750	ESAD
cb69d1fba616ddc3cedf635f4a60d4e5a10e7206e091253e753900a02eac908e	ESAD	370	junction	cb69d1fba616ddc3cedf635f4a60d4e5a10e7206e091253e753900a02eac908e	ESAD
cdbcf2fc8ac3cd58a70dadea86a7d583d51754be9a38177c868368d3b1481976	ESAD	250	junction	cdbcf2fc8ac3cd58a70dadea86a7d583d51754be9a38177c868368d3b1481976	ESAD
d06edce9bcfc01daaf65ac43244b76ff54a7a6b548ae7dc38c4bfcc0c04dcdcd	ESAD	318	junction	d06edce9bcfc01daaf65ac43244b76ff54a7a6b548ae7dc38c4bfcc0c04dcdcd	ESAD
d0f07dbe50b17d281d72e7f09b962f4e75e676ff37d2497a1f6c721b17148d66	ESAD	366	junction	d0f07dbe50b17d281d72e7f09b962f4e75e676ff37d2497a1f6c721b17148d66	ESAD
d1d692f974e6dbbf5cc7610bed5e488d3d142979c7f3b01e199b273d70bd7fb8	ESAD	262	junction	d1d692f974e6dbbf5cc7610bed5e488d3d142979c7f3b01e199b273d70bd7fb8	ESAD
d20a89efc7cea30166cb218ed5c1648db76ed824426a7b58ba50cbbe39191475	ESAD	6	junction	d20a89efc7cea30166cb218ed5c1648db76ed824426a7b58ba50cbbe39191475	ESAD
d2588a7edd6efd35550bc49ebb03aae4445eec879c3a29a0c15e5a73654f2d04	ESAD	350	junction	d2588a7edd6efd35550bc49ebb03aae4445eec879c3a29a0c15e5a73654f2d04	ESAD
d2588a7edd6efd35550bc49ebb03aae4445eec879c3a29a0c15e5a73654f2d04.2	ESAD	342	junction	d2588a7edd6efd35550bc49ebb03aae4445eec879c3a29a0c15e5a73654f2d04.2	ESAD
d2736f3a3d17df5d3dd2fcb76ecd3043e35464dd05b5b86e3722d86578c68eef	ESAD	406	junction	d2736f3a3d17df5d3dd2fcb76ecd3043e35464dd05b5b86e3722d86578c68eef	ESAD
d2f9a56f010f5bc0e3d65890a416e91d6ce69b2bcb1c0f76de9345dd835fe6bb	ESAD	700	junction	d2f9a56f010f5bc0e3d65890a416e91d6ce69b2bcb1c0f76de9345dd835fe6bb	ESAD
d4c95d7413e88f9739a2fb25dfdddb938f57520c6d76a454a6c3d037ea9ff977	ESAD	192	junction	d4c95d7413e88f9739a2fb25dfdddb938f57520c6d76a454a6c3d037ea9ff977	ESAD
d91afc2f2ce5e663c474bccf20ea8abd1fdcf1a1d735d8422712b36ea154040e	ESAD	572	junction	d91afc2f2ce5e663c474bccf20ea8abd1fdcf1a1d735d8422712b36ea154040e	ESAD
d9ae1705ce0b4462ff82a46be3d5304819ffddc3715bbb6afd6e6181b8519846	ESAD	58	junction	d9ae1705ce0b4462ff82a46be3d5304819ffddc3715bbb6afd6e6181b8519846	ESAD
d9b28bce2ac1e8c6a6ea51c8363ea95bf522dea7876935acb451648cfe407994	ESAD	282	junction	d9b28bce2ac1e8c6a6ea51c8363ea95bf522dea7876935acb451648cfe407994	ESAD
ddbe3673feb6caaa40694506650420d1feeb0bd3de13ee81576efb6322e79ee1	ESAD	202	junction	ddbe3673feb6caaa40694506650420d1feeb0bd3de13ee81576efb6322e79ee1	ESAD
e1b2d7684cd7ed797f54d3996d6e5ddde59728fc88304ef2ca66b0b8593dd4ff	ESAD	186	junction	e1b2d7684cd7ed797f54d3996d6e5ddde59728fc88304ef2ca66b0b8593dd4ff	ESAD
e26373e3064c37d6a8bc3cd736998e37a396e3f84e46ee0fb03d1d5d99a76c53	ESAD	430	junction	e26373e3064c37d6a8bc3cd736998e37a396e3f84e46ee0fb03d1d5d99a76c53	ESAD
e308def3a33079a84267fe54fe2e611bcf37616a0b05c1a6586db411f5fa1086	ESAD	244	junction	e308def3a33079a84267fe54fe2e611bcf37616a0b05c1a6586db411f5fa1086	ESAD
e3271ccee7d736f7a876d8582ce224239ba68d7558af1f46de04e7024b9511c3	ESAD	270	junction	e3271ccee7d736f7a876d8582ce224239ba68d7558af1f46de04e7024b9511c3	ESAD
e371d3d80a557bcca0c432e286e31b320554ca59adccb179f38e5c3bbb2a0a0e	ESAD	242	junction	e371d3d80a557bcca0c432e286e31b320554ca59adccb179f38e5c3bbb2a0a0e	ESAD
e47a532bbb49cb08688ac3d50b5229d72adb20ab9182dffbe43f7330533d89d9	ESAD	66	junction	e47a532bbb49cb08688ac3d50b5229d72adb20ab9182dffbe43f7330533d89d9	ESAD
e4831d0fe318c0dfe320eb9be0148336ad1a096e5a3f8675fe517ec2b5d82de6	ESAD	432	junction	e4831d0fe318c0dfe320eb9be0148336ad1a096e5a3f8675fe517ec2b5d82de6	ESAD
e690adbb9f70f16aad05be4aedda090d0c444522844f6f8d51df380106e4ce49	ESAD	830	junction	e690adbb9f70f16aad05be4aedda090d0c444522844f6f8d51df380106e4ce49	ESAD
e6c11c6fb5881ea37c29f9a93b0fca175c770670e1571034d32b3ad098b761ab	ESAD	696	junction	e6c11c6fb5881ea37c29f9a93b0fca175c770670e1571034d32b3ad098b761ab	ESAD
e7af9a8f5176677e829f051de9d912d834c516322635042e4780a570683898ab	ESAD	704	junction	e7af9a8f5176677e829f051de9d912d834c516322635042e4780a570683898ab	ESAD
ea9ee2acb5fbb50f049bddc8297fe4cb8652b8990328281283bddb5b6cdb920c	ESAD	512	junction	ea9ee2acb5fbb50f049bddc8297fe4cb8652b8990328281283bddb5b6cdb920c	ESAD
ebb906810ec699e562cb9358a0c4915317c76ed19bdf166cb8b26aa61c8d8696	ESAD	396	junction	ebb906810ec699e562cb9358a0c4915317c76ed19bdf166cb8b26aa61c8d8696	ESAD
ebf7ea541c0d14c205dd1a7d16ed894a4ef2c0d5796122bf22a791b5114859da	ESAD	352	junction	ebf7ea541c0d14c205dd1a7d16ed894a4ef2c0d5796122bf22a791b5114859da	ESAD
ec1086015889ae545b0cb5b98d60a7a02bafe2a5650f7e32990ace37c08e5f1c	ESAD	190	junction	ec1086015889ae545b0cb5b98d60a7a02bafe2a5650f7e32990ace37c08e5f1c	ESAD
ec1b7dd053c6288890ebba70cf1089af8943d7c5876796aaaa527b7a4131794b	ESAD	204	junction	ec1b7dd053c6288890ebba70cf1089af8943d7c5876796aaaa527b7a4131794b	ESAD
eceb44da19ee3715c17ffb12e56c8ce4a25061e052f0da1267bb36ba0a4e2f23	ESAD	446	junction	eceb44da19ee3715c17ffb12e56c8ce4a25061e052f0da1267bb36ba0a4e2f23	ESAD
f3c6585c83099259a929a7fc221b5702558e1bfd3ee5c9584a216a59f950aaff	ESAD	298	junction	f3c6585c83099259a929a7fc221b5702558e1bfd3ee5c9584a216a59f950aaff	ESAD
f4661599926f32245eb1f3e52788501bd0897f45a6b27ca5cdede18edb14be28	ESAD	326	junction	f4661599926f32245eb1f3e52788501bd0897f45a6b27ca5cdede18edb14be28	ESAD
f766c67a2f3bc4d0cbb92614275ac052201cee5880928b2acd169e5802027797.2	ESAD	114	junction	f766c67a2f3bc4d0cbb92614275ac052201cee5880928b2acd169e5802027797.2	ESAD
f766c67a2f3bc4d0cbb92614275ac052201cee5880928b2acd169e5802027797.3	ESAD	126	junction	f766c67a2f3bc4d0cbb92614275ac052201cee5880928b2acd169e5802027797.3	ESAD
f837f50314409b71ad656412600a3a034ef97816e1717c200ccea489b29cbedc	ESAD	382	junction	f837f50314409b71ad656412600a3a034ef97816e1717c200ccea489b29cbedc	ESAD
f9b321ca7e0e9d738cc4bdc16df6335c03a699de6cfdc1f0aaec1d18f17654ad	ESAD	724	junction	f9b321ca7e0e9d738cc4bdc16df6335c03a699de6cfdc1f0aaec1d18f17654ad	ESAD
f9d19a40c8e96a56205af0a2f2b7290a94f07f82c9635cac07dd71c063a5fa64	ESAD	220	junction	f9d19a40c8e96a56205af0a2f2b7290a94f07f82c9635cac07dd71c063a5fa64	ESAD
fadb396bcd77015f5a1a0dbdc830b53d9d9439ea9455173079b65e5221242029	ESAD	810	junction	fadb396bcd77015f5a1a0dbdc830b53d9d9439ea9455173079b65e5221242029	ESAD
fbcc66da7a4073672ef3f6cc4217349773552ed719dd04f411cc2f1e55587453	ESAD	422	junction	fbcc66da7a4073672ef3f6cc4217349773552ed719dd04f411cc2f1e55587453	ESAD
ff1ae33882f94afb4a45a6e93d6871f835891aecc93d52799058a07f25a0f449	ESAD	234	junction	ff1ae33882f94afb4a45a6e93d6871f835891aecc93d52799058a07f25a0f449	ESAD
ffe2e6c271347f25927c6e8975685a1b04934a0406f589f3df1608de00a7719f	ESAD	146	junction	ffe2e6c271347f25927c6e8975685a1b04934a0406f589f3df1608de00a7719f	ESAD
ffedffc3ce438befa0e4d0c20dc30ac3575ad8df98f4acab601279ee7ab35f14	ESAD	340	junction	ffedffc3ce438befa0e4d0c20dc30ac3575ad8df98f4acab601279ee7ab35f14	ESAD
fff28d604ad38acee1c554c2c8ae8106f1b7325c057436bdb75b87bf12897fbd	ESAD	384	junction	fff28d604ad38acee1c554c2c8ae8106f1b7325c057436bdb75b87bf12897fbd	ESAD
0128	GBM	5	loose	0128	GBM
0145	GBM	15	loose	0145	GBM
0155	GBM	0	loose	0155	GBM
0185	GBM	6	loose	0185	GBM
0210	GBM	4	loose	0210	GBM
0211	GBM	20	loose	0211	GBM
0214	GBM	39	loose	0214	GBM
04616fe602821be83f79e051c94c28347907f72d4e9ed5d7f1f50d4cfcd71d01	ESAD	33	loose	04616fe602821be83f79e051c94c28347907f72d4e9ed5d7f1f50d4cfcd71d01	ESAD
04f3767cc1c78f1c22b06d659d308741a588e272ee723b39f744913ad669cd6e	ESAD	5	loose	04f3767cc1c78f1c22b06d659d308741a588e272ee723b39f744913ad669cd6e	ESAD
05fb093d1b2af292cf0795316e9afefc4407f42256c914edeee9ac881e1d435c	ESAD	14	loose	05fb093d1b2af292cf0795316e9afefc4407f42256c914edeee9ac881e1d435c	ESAD
0648	GBM	37	loose	0648	GBM
0723	OV	98	loose	0723	OV
0725	OV	26	loose	0725	OV
0727	OV	24	loose	0727	OV
0744	GBM	14	loose	0744	GBM
0745	GBM	12	loose	0745	GBM
0751	OV	64	loose	0751	OV
0877	GBM	8	loose	0877	GBM
0881	GBM	0	loose	0881	GBM
0890	OV	62	loose	0890	OV
0906	OV	26	loose	0906	OV
0912	OV	23	loose	0912	OV
0934	OV	91	loose	0934	OV
0937	OV	10	loose	0937	OV
0938	OV	53	loose	0938	OV
0980	OV	26	loose	0980	OV
0982	OV	63	loose	0982	OV
0985a2e91070b77b0b7c61278b04d7c88864c3bc670f211bdb54bd09d271e986	ESAD	46	loose	0985a2e91070b77b0b7c61278b04d7c88864c3bc670f211bdb54bd09d271e986	ESAD
0a85375cbfa23eb57f9647c13fd4a774922afd325ecca61ecb70f165f9e4a2e7	ESAD	41	loose	0a85375cbfa23eb57f9647c13fd4a774922afd325ecca61ecb70f165f9e4a2e7	ESAD
0b64dd9e11bfd9b7413d9bc770587b6a011e6946109f1ded24bc92444941450f	ESAD	17	loose	0b64dd9e11bfd9b7413d9bc770587b6a011e6946109f1ded24bc92444941450f	ESAD
0c18dae928d5146c8b0d052a9ceffa02ef1e1dcd70f6e5c321dc37c264d9c9d8	ESAD	27	loose	0c18dae928d5146c8b0d052a9ceffa02ef1e1dcd70f6e5c321dc37c264d9c9d8	ESAD
0de0307feaaebcd92622acc19aae9d7ee9ba2f58ebfbfa0f8523e7c4f1b6b3ed	ESAD	36	loose	0de0307feaaebcd92622acc19aae9d7ee9ba2f58ebfbfa0f8523e7c4f1b6b3ed	ESAD
0df54561b9dfce1f7cc6d2858f039c4303727558615b8b64364b09c963da19f2	ESAD	66	loose	0df54561b9dfce1f7cc6d2858f039c4303727558615b8b64364b09c963da19f2	ESAD
0f48df24681bff9daca43ea351a061173146b5a347774916fe4c683d65016d10	ESAD	8	loose	0f48df24681bff9daca43ea351a061173146b5a347774916fe4c683d65016d10	ESAD
0f4a8719dbb0caa2e8b638fe74d6c6dac6ca5ee91e4423e421a2f013170a0ca9	ESAD	62	loose	0f4a8719dbb0caa2e8b638fe74d6c6dac6ca5ee91e4423e421a2f013170a0ca9	ESAD
1063	GBM	22	loose	1063	GBM
1086	GBM	2	loose	1086	GBM
1103	OV	44	loose	1103	OV
1110	OV	30	loose	1110	OV
1118	OV	43	loose	1118	OV
1124	OV	80	loose	1124	OV
11524e868cfd06698eab18840572b21e31ccc772b0a6d8695b31b16d44f17de9	ESAD	11	loose	11524e868cfd06698eab18840572b21e31ccc772b0a6d8695b31b16d44f17de9	ESAD
1319	OV	115	loose	1319	OV
1331	OV	25	loose	1331	OV
1347	OV	91	loose	1347	OV
1349	OV	19	loose	1349	OV
1367	OV	10	loose	1367	OV
1371	OV	163	loose	1371	OV
1395dc4ab7c754e0a84c8daa3996f16e5caf11169f8a9be6c800f6da00474321	ESAD	25	loose	1395dc4ab7c754e0a84c8daa3996f16e5caf11169f8a9be6c800f6da00474321	ESAD
1401	GBM	32	loose	1401	GBM
1419	OV	24	loose	1419	OV
1459	GBM	17	loose	1459	GBM
1460	GBM	12	loose	1460	GBM
1466	OV	153	loose	1466	OV
1487	OV	47	loose	1487	OV
1491	OV	15	loose	1491	OV
1514	OV	28	loose	1514	OV
1542	OV	28	loose	1542	OV
1544	OV	53	loose	1544	OV
1548	OV	18	loose	1548	OV
1552	OV	46	loose	1552	OV
1557	OV	70	loose	1557	OV
1558	OV	81	loose	1558	OV
1562	OV	7	loose	1562	OV
1570	OV	13	loose	1570	OV
1571	OV	73	loose	1571	OV
1574	OV	19	loose	1574	OV
158cfbabcfd84336aa6020a4d6ada78d4cc56ae83802bc9e556d5d8db44af5a0	ESAD	75	loose	158cfbabcfd84336aa6020a4d6ada78d4cc56ae83802bc9e556d5d8db44af5a0	ESAD
160-23716-53M-37--160-24958N-132N-GST	BE	7	loose	160-23716-53M-37--160-24958N-132N-GST	BE
1614	OV	26	loose	1614	OV
163-23740-14O-37--163-25059N-78R-BLD	BE	35	loose	163-23740-14O-37--163-25059N-78R-BLD	BE
163-23749-256R-35--163-25059N-78R-BLD	BE	7	loose	163-23749-256R-35--163-25059N-78R-BLD	BE
163-24735-256R-37--163-25059N-78R-BLD	BE	27	loose	163-24735-256R-37--163-25059N-78R-BLD	BE
1632	OV	21	loose	1632	OV
1634	OV	38	loose	1634	OV
1666	OV	18	loose	1666	OV
169-23764-9T-31--169-25060N-253T-BLD	BE	9	loose	169-23764-9T-31--169-25060N-253T-BLD	BE
16ecc4c79c9ca8e731e9b0f2c6084c63a222890ad8d448c3658736dbc6eff424	ESAD	36	loose	16ecc4c79c9ca8e731e9b0f2c6084c63a222890ad8d448c3658736dbc6eff424	ESAD
17-23561-12V-35--17-24987N-105W-BLD	BE	15	loose	17-23561-12V-35--17-24987N-105W-BLD	BE
170-23794-3B-33--170-25061N-3B-BLD	BE	0	loose	170-23794-3B-33--170-25061N-3B-BLD	BE
1970	GBM	39	loose	1970	GBM
1a7f4e2b2564e194582ecffac318dfbe9d86f05a14aac53a5f2e2cd58840ee08	ESAD	28	loose	1a7f4e2b2564e194582ecffac318dfbe9d86f05a14aac53a5f2e2cd58840ee08	ESAD
1abf4349b13234e9b9fe664e01960425da9b129ab4b0672a69a7103ff2bbf1b3	ESAD	44	loose	1abf4349b13234e9b9fe664e01960425da9b129ab4b0672a69a7103ff2bbf1b3	ESAD
2000	OV	60	loose	2000	OV
2024	OV	8	loose	2024	OV
2045	OV	15	loose	2045	OV
2050	OV	15	loose	2050	OV
206327a320b967baf95361f43e814ab0e7403364077c84c04722fbe9ec7d59d5	ESAD	137	loose	206327a320b967baf95361f43e814ab0e7403364077c84c04722fbe9ec7d59d5	ESAD
21c3e02f465c21c25f5d7f686b2a5c008b23a2fe5469d444ebac07f80a1ab962	ESAD	20	loose	21c3e02f465c21c25f5d7f686b2a5c008b23a2fe5469d444ebac07f80a1ab962	ESAD
222-24370-179T-30--222-25062N-179T-BLD	BE	2	loose	222-24370-179T-30--222-25062N-179T-BLD	BE
2290	OV	30	loose	2290	OV
2368c29b6b700ca640ec887666c149533231d23ea32718f6f83469b5b7ad7aa4	ESAD	41	loose	2368c29b6b700ca640ec887666c149533231d23ea32718f6f83469b5b7ad7aa4	ESAD
2391	OV	8	loose	2391	OV
23b4e52e36a71bfaec31dc2edd3dd8e6e470acab656279f96446223d654bcc2c	ESAD	2	loose	23b4e52e36a71bfaec31dc2edd3dd8e6e470acab656279f96446223d654bcc2c	ESAD
2400	OV	156	loose	2400	OV
2485	GBM	337	loose	2485	GBM
2567f5779f07b4c5c7eb5ef5590da72b4352f0e6353150b2f090c354721bebac.2	ESAD	38	loose	2567f5779f07b4c5c7eb5ef5590da72b4352f0e6353150b2f090c354721bebac.2	ESAD
2570	GBM	11	loose	2570	GBM
25e28ea260c8efc00de88a0e7da3faaea440f68bd539d0fd84e7ae65e33969e9	ESAD	49	loose	25e28ea260c8efc00de88a0e7da3faaea440f68bd539d0fd84e7ae65e33969e9	ESAD
2613d0db5e6407392aa2691ce6db2a4cd350b8258a38f9f6b83844d3b8272685	ESAD	17	loose	2613d0db5e6407392aa2691ce6db2a4cd350b8258a38f9f6b83844d3b8272685	ESAD
2629	GBM	37	loose	2629	GBM
266-24139-216R-35--266-25063N-67T-BLD	BE	19	loose	266-24139-216R-35--266-25063N-67T-BLD	BE
266-24145-67T-34--266-25063N-67T-BLD	BE	65	loose	266-24145-67T-34--266-25063N-67T-BLD	BE
2689	COAD	24	loose	2689	COAD
26f2fa25ea0f6c5911c3bb6e831d1a0633ce4a1b295028b1d09ef01b66cec0e2	ESAD	72	loose	26f2fa25ea0f6c5911c3bb6e831d1a0633ce4a1b295028b1d09ef01b66cec0e2	ESAD
2747cb2bda1947f81a644e04eff504ecc3bdbd1723259420fbabbb33c4d2c8c0	ESAD	64	loose	2747cb2bda1947f81a644e04eff504ecc3bdbd1723259420fbabbb33c4d2c8c0	ESAD
279-24924-251R-32--279-25064N-76R-BLD	BE	17	loose	279-24924-251R-32--279-25064N-76R-BLD	BE
2905	AML	1	loose	2905	AML
2906	AML	0	loose	2906	AML
2907	AML	0	loose	2907	AML
290d0ca5c183044dfb5f98e84bd2ca1cdc2aab53a21f90070e15694bd111fe16	ESAD	82	loose	290d0ca5c183044dfb5f98e84bd2ca1cdc2aab53a21f90070e15694bd111fe16	ESAD
295-24169-103S-32--295-25066N-72T-BLD	BE	16	loose	295-24169-103S-32--295-25066N-72T-BLD	BE
295-24175-215U-34--295-25066N-72T-BLD	BE	38	loose	295-24175-215U-34--295-25066N-72T-BLD	BE
295-24184-215U-26--295-25066N-72T-BLD	BE	42	loose	295-24184-215U-26--295-25066N-72T-BLD	BE
2963	AML	1	loose	2963	AML
2964	AML	0	loose	2964	AML
2965	AML	0	loose	2965	AML
2966	AML	2	loose	2966	AML
2967	AML	0	loose	2967	AML
2968	AML	0	loose	2968	AML
2969	AML	1	loose	2969	AML
2970	AML	0	loose	2970	AML
2971	AML	2	loose	2971	AML
2972	AML	0	loose	2972	AML
2973	AML	0	loose	2973	AML
2974	AML	1	loose	2974	AML
2975	AML	0	loose	2975	AML
2976	AML	0	loose	2976	AML
2977	AML	0	loose	2977	AML
2978	AML	0	loose	2978	AML
2979	AML	0	loose	2979	AML
2980	AML	0	loose	2980	AML
2981	AML	3	loose	2981	AML
2982	AML	0	loose	2982	AML
2983	AML	0	loose	2983	AML
2984	AML	1	loose	2984	AML
2985	AML	0	loose	2985	AML
2986	AML	2	loose	2986	AML
2987	AML	0	loose	2987	AML
2988	AML	0	loose	2988	AML
2989	AML	2	loose	2989	AML
2990	AML	0	loose	2990	AML
2991	AML	0	loose	2991	AML
2992	AML	0	loose	2992	AML
2994	AML	0	loose	2994	AML
2995	AML	0	loose	2995	AML
2996	AML	0	loose	2996	AML
2997	AML	0	loose	2997	AML
2998	AML	2	loose	2998	AML
2999	AML	0	loose	2999	AML
29a625999b8102746891f4265f9aa80f576db0b4c9456ec553ff482d3c40d130	ESAD	155	loose	29a625999b8102746891f4265f9aa80f576db0b4c9456ec553ff482d3c40d130	ESAD
2e9faf28897dce9dfd86c06101eeb7398f945036f13b5f9d78dd02e113ca9ba0	ESAD	47	loose	2e9faf28897dce9dfd86c06101eeb7398f945036f13b5f9d78dd02e113ca9ba0	ESAD
2ebb7adee8dfe2f8b4c0820e9138453f3cf04251686f23b187dc30bbb52c7e96	ESAD	14	loose	2ebb7adee8dfe2f8b4c0820e9138453f3cf04251686f23b187dc30bbb52c7e96	ESAD
2fb1c6063e7eac401741e82a2ac128bcb29d26f1f7f301a41db9878ab7813f6f	ESAD	18	loose	2fb1c6063e7eac401741e82a2ac128bcb29d26f1f7f301a41db9878ab7813f6f	ESAD
3000	AML	3	loose	3000	AML
3002	AML	0	loose	3002	AML
3005	AML	2	loose	3005	AML
3006	AML	2	loose	3006	AML
3007	AML	2	loose	3007	AML
3008	AML	2	loose	3008	AML
3009	AML	0	loose	3009	AML
3011	AML	1	loose	3011	AML
3012	AML	0	loose	3012	AML
303-23602-162L-38--303-24975N-41K-GST	BE	26	loose	303-23602-162L-38--303-24975N-41K-GST	BE
303-24660-41K-37--303-24975N-41K-GST	BE	13	loose	303-24660-41K-37--303-24975N-41K-GST	BE
30e5afb25005a5e6be0c0de29595b2f386308b854a73ffb15317c461718205a3	ESAD	38	loose	30e5afb25005a5e6be0c0de29595b2f386308b854a73ffb15317c461718205a3	ESAD
310c15daca2145583e440e9a6ab0a6052fa4d08b785d6455e961ddce5f4196fe	ESAD	27	loose	310c15daca2145583e440e9a6ab0a6052fa4d08b785d6455e961ddce5f4196fe	ESAD
3132e2e81d7312f93261cf771e6cc7fdb8e4800ad8d8f4049bc7ec800b08789c	ESAD	16	loose	3132e2e81d7312f93261cf771e6cc7fdb8e4800ad8d8f4049bc7ec800b08789c	ESAD
3180f8e34845d13e27dddd90486dba083cd87a340d919f75d29859766f7faee4	ESAD	49	loose	3180f8e34845d13e27dddd90486dba083cd87a340d919f75d29859766f7faee4	ESAD
322-24807-130U-35--322-25067N-130U-BLD	BE	16	loose	322-24807-130U-35--322-25067N-130U-BLD	BE
3308	KIRC	10	loose	3308	KIRC
3324	KIRC	2	loose	3324	KIRC
3363	KIRC	17	loose	3363	KIRC
3372	KIRC	2	loose	3372	KIRC
3387	KIRC	0	loose	3387	KIRC
3454	KIRC	3	loose	3454	KIRC
3455	KIRC	6	loose	3455	KIRC
3466	KIRP	37	loose	3466	KIRP
3467	KIRP	3	loose	3467	KIRP
3468	KIRP	0	loose	3468	KIRP
3472	KIRP	0	loose	3472	KIRP
3518	COAD	14	loose	3518	COAD
3574	COAD	35	loose	3574	COAD
3582	COAD	137	loose	3582	COAD
3593	COAD	20	loose	3593	COAD
3709a5a3c78b4c21fbcb1c6a15585b054c7d38d78a1eaa3ee4e307b79c11a245	ESAD	51	loose	3709a5a3c78b4c21fbcb1c6a15585b054c7d38d78a1eaa3ee4e307b79c11a245	ESAD
3727	COAD	3	loose	3727	COAD
37b56a8f3ae8e0f59bb17651a17a967c62f68204140b18b7d013c9eb709c69d2	ESAD	27	loose	37b56a8f3ae8e0f59bb17651a17a967c62f68204140b18b7d013c9eb709c69d2	ESAD
3885	COAD	160	loose	3885	COAD
3890	COAD	15	loose	3890	COAD
3896	COAD	11	loose	3896	COAD
391-23521-155R-31--391-25007N-73P-BLD	BE	25	loose	391-23521-155R-31--391-25007N-73P-BLD	BE
391-23866-82K-33--391-25007N-73P-BLD	BE	13	loose	391-23866-82K-33--391-25007N-73P-BLD	BE
3913	COAD	24	loose	3913	COAD
392af0c06be23bfc8f60361072a92268662bbd2b0d739201b5c2fbd34a15ff25	ESAD	38	loose	392af0c06be23bfc8f60361072a92268662bbd2b0d739201b5c2fbd34a15ff25	ESAD
396-24457-98A-37--396-25008N-52V-BLD	BE	76	loose	396-24457-98A-37--396-25008N-52V-BLD	BE
3abbfc149ac774b3bfed61438c5b709a473c0c6162b6707b4bfebef67eba2260	ESAD	30	loose	3abbfc149ac774b3bfed61438c5b709a473c0c6162b6707b4bfebef67eba2260	ESAD
3abbfc149ac774b3bfed61438c5b709a473c0c6162b6707b4bfebef67eba2260.2	ESAD	32	loose	3abbfc149ac774b3bfed61438c5b709a473c0c6162b6707b4bfebef67eba2260.2	ESAD
3b5faf7fabba6b596f14ce281d06ce54af4d06027722cfd3114b8f0dd0ab5ae5	ESAD	121	loose	3b5faf7fabba6b596f14ce281d06ce54af4d06027722cfd3114b8f0dd0ab5ae5	ESAD
3d6f94f343bc3a4030461f304e31d6aea165b3bb39f965d71697c7db8c1cee47	ESAD	59	loose	3d6f94f343bc3a4030461f304e31d6aea165b3bb39f965d71697c7db8c1cee47	ESAD
3ecd9b003fa28a4fde294f8a7b8f0f260fcf21f80d9ca1cf4e6312caab88c6a7	ESAD	51	loose	3ecd9b003fa28a4fde294f8a7b8f0f260fcf21f80d9ca1cf4e6312caab88c6a7	ESAD
3f033a2314ecd6d19bd09179af1fd688ee38da8a63ea2b0879ec99d86e7460d6	ESAD	10	loose	3f033a2314ecd6d19bd09179af1fd688ee38da8a63ea2b0879ec99d86e7460d6	ESAD
3f09772b941e0dc3721126176238df54197fca741e9c633c0860bc68791c6e7a	ESAD	39	loose	3f09772b941e0dc3721126176238df54197fca741e9c633c0860bc68791c6e7a	ESAD
3ff03763c8288dca4d2513ab1f9ce95572eef640989b55b7ed10a722484ac238	ESAD	52	loose	3ff03763c8288dca4d2513ab1f9ce95572eef640989b55b7ed10a722484ac238	ESAD
4007	COAD	15	loose	4007	COAD
4015	COAD	59	loose	4015	COAD
4102009	MALY	21	loose	4102009	MALY
4103141	MALY	4	loose	4103141	MALY
4104893	MALY	18	loose	4104893	MALY
4105105	MALY	4	loose	4105105	MALY
4105746	MALY	7	loose	4105746	MALY
4108101	MALY	64	loose	4108101	MALY
4108992	MALY	6	loose	4108992	MALY
4111326	MALY	9	loose	4111326	MALY
4111337	MALY	80	loose	4111337	MALY
4112447	MALY	4	loose	4112447	MALY
4112512	MALY	3	loose	4112512	MALY
4113191	MALY	2	loose	4113191	MALY
4113825	MALY	3	loose	4113825	MALY
4114	KIRP	2	loose	4114	KIRP
4115	KIRP	0	loose	4115	KIRP
4116	KIRP	10	loose	4116	KIRP
4117	KIRP	7	loose	4117	KIRP
4119027	MALY	6	loose	4119027	MALY
4119279	MALY	50	loose	4119279	MALY
4120157	MALY	5	loose	4120157	MALY
4121361	MALY	11	loose	4121361	MALY
4124188	MALY	4	loose	4124188	MALY
4124542	MALY	5	loose	4124542	MALY
4125240	MALY	9	loose	4125240	MALY
4127766	MALY	2	loose	4127766	MALY
4130003	MALY	12	loose	4130003	MALY
4131095	MALY	3	loose	4131095	MALY
4131257	MALY	19	loose	4131257	MALY
4133263	MALY	28	loose	4133263	MALY
4133511	MALY	9	loose	4133511	MALY
4134005	MALY	7	loose	4134005	MALY
4134434	MALY	22	loose	4134434	MALY
4135099	MALY	48	loose	4135099	MALY
4135350	MALY	61	loose	4135350	MALY
4136702	MALY	7	loose	4136702	MALY
4138527	MALY	15	loose	4138527	MALY
4138885	MALY	5	loose	4138885	MALY
4139696	MALY	41	loose	4139696	MALY
4142267	MALY	8	loose	4142267	MALY
4142605	MALY	5	loose	4142605	MALY
4144633	MALY	8	loose	4144633	MALY
4144951	MALY	8	loose	4144951	MALY
4145056	MALY	6	loose	4145056	MALY
4145177	MALY	10	loose	4145177	MALY
4145528	MALY	217	loose	4145528	MALY
4146289	MALY	6	loose	4146289	MALY
4147081	MALY	30	loose	4147081	MALY
4147968	MALY	31	loose	4147968	MALY
4149246	MALY	6	loose	4149246	MALY
4157186	MALY	5	loose	4157186	MALY
4159170	MALY	4	loose	4159170	MALY
4160100	MALY	12	loose	4160100	MALY
4160468	MALY	5	loose	4160468	MALY
4163639	MALY	15	loose	4163639	MALY
4165379	MALY	5	loose	4165379	MALY
4166151	MALY	6	loose	4166151	MALY
4166503	MALY	2	loose	4166503	MALY
4166706	MALY	15	loose	4166706	MALY
4170686	MALY	3	loose	4170686	MALY
4172511	MALY	2	loose	4172511	MALY
4174905	MALY	4	loose	4174905	MALY
4175837	MALY	10	loose	4175837	MALY
4176133	MALY	37	loose	4176133	MALY
4177434	MALY	19	loose	4177434	MALY
4177601	MALY	5	loose	4177601	MALY
4177810	MALY	6	loose	4177810	MALY
4177856	MALY	11	loose	4177856	MALY
4177987	MALY	4	loose	4177987	MALY
4178310	MALY	4	loose	4178310	MALY
4178345	MALY	12	loose	4178345	MALY
4178655	MALY	9	loose	4178655	MALY
4182393	MALY	10	loose	4182393	MALY
4184094	MALY	6	loose	4184094	MALY
4188398	MALY	34	loose	4188398	MALY
4189035	MALY	18	loose	4189035	MALY
4189200	MALY	3	loose	4189200	MALY
4189998	MALY	7	loose	4189998	MALY
4190495	MALY	19	loose	4190495	MALY
4190784	MALY	5	loose	4190784	MALY
4193278	MALY	11	loose	4193278	MALY
4193638	MALY	15	loose	4193638	MALY
4194218	MALY	3	loose	4194218	MALY
4194891	MALY	3	loose	4194891	MALY
4196670	MALY	3	loose	4196670	MALY
4198542	MALY	5	loose	4198542	MALY
4199714	MALY	31	loose	4199714	MALY
41db2179d8691b0d49e9bc19245ac8af93d9c637a498ec7ab822269664452482	ESAD	39	loose	41db2179d8691b0d49e9bc19245ac8af93d9c637a498ec7ab822269664452482	ESAD
42-24292-53L-36--42-24954N-53L-GST	BE	7	loose	42-24292-53L-36--42-24954N-53L-GST	BE
4280	STAD	4	loose	4280	STAD
42a2b2ad86b3d0f66ecec5ce1d8b0cca6e334d365d6434d2bf1050e9b2f97990	ESAD	23	loose	42a2b2ad86b3d0f66ecec5ce1d8b0cca6e334d365d6434d2bf1050e9b2f97990	ESAD
43-23593-29P-28--43-24956N-29P-GST	BE	7	loose	43-23593-29P-28--43-24956N-29P-GST	BE
4326	KIRC	1	loose	4326	KIRC
4327	KIRC	0	loose	4327	KIRC
4442	STAD	7	loose	4442	STAD
4443	STAD	56	loose	4443	STAD
445fe324ced35562aa4eb787ace04dc826bbc25ec67b236bba7f226837270672	ESAD	7	loose	445fe324ced35562aa4eb787ace04dc826bbc25ec67b236bba7f226837270672	ESAD
4474	STAD	7	loose	4474	STAD
450-23914-37P-34--450-25070N-120R-BLD	BE	15	loose	450-23914-37P-34--450-25070N-120R-BLD	BE
450-23923-120R-29--450-25070N-120R-BLD	BE	36	loose	450-23923-120R-29--450-25070N-120R-BLD	BE
450-24753-37P-29--450-25070N-120R-BLD	BE	10	loose	450-24753-37P-29--450-25070N-120R-BLD	BE
4639	KIRC	0	loose	4639	KIRC
4781	KIRC	6	loose	4781	KIRC
483-23830-132U-31--483-24961N-246S-GST	BE	18	loose	483-23830-132U-31--483-24961N-246S-GST	BE
4870	KIRC	12	loose	4870	KIRC
4885	KIRC	0	loose	4885	KIRC
48bba806613d4dc7b432d75c0069ee314684f6d69e3f52503b52f3150448dc14	ESAD	105	loose	48bba806613d4dc7b432d75c0069ee314684f6d69e3f52503b52f3150448dc14	ESAD
490ae7348c12a59b53192e341610b5c588783c80cbd969631ecf953ad0baf508	ESAD	38	loose	490ae7348c12a59b53192e341610b5c588783c80cbd969631ecf953ad0baf508	ESAD
4977	KIRC	2	loose	4977	KIRC
4e8a9e9de13e84cb13e7f68253d35f16e193470fcdb70f686c8bacfd2424356a	ESAD	73	loose	4e8a9e9de13e84cb13e7f68253d35f16e193470fcdb70f686c8bacfd2424356a	ESAD
5094	KIRC	6	loose	5094	KIRC
50da2d6b3ff31238fea9f4ebb147722fc306715eea709cd1107d229810ce4202	ESAD	73	loose	50da2d6b3ff31238fea9f4ebb147722fc306715eea709cd1107d229810ce4202	ESAD
512-23971-43R-27--512-25072N-306R-BLD	BE	127	loose	512-23971-43R-27--512-25072N-306R-BLD	BE
512-23977-306R-29--512-25072N-306R-BLD	BE	37	loose	512-23977-306R-29--512-25072N-306R-BLD	BE
5278	LGG	4	loose	5278	LGG
5318	LGG	5	loose	5318	LGG
5319	LGG	2	loose	5319	LGG
5395	LGG	1	loose	5395	LGG
5415	GBM	26	loose	5415	GBM
5454	KIRC	3	loose	5454	KIRC
5633	KIRC	3	loose	5633	KIRC
5635	KIRC	1	loose	5635	KIRC
5647	STAD	78	loose	5647	STAD
5651	GBM	13	loose	5651	GBM
5653075dfbef8dbf0fd2c89d49e162c3decfdf3b62db87ee57a7124937af2792	ESAD	22	loose	5653075dfbef8dbf0fd2c89d49e162c3decfdf3b62db87ee57a7124937af2792	ESAD
568-24690-177S-27--568-25075N-302T-BLD	BE	2	loose	568-24690-177S-27--568-25075N-302T-BLD	BE
568-24693-177S-30--568-25075N-302T-BLD	BE	0	loose	568-24693-177S-30--568-25075N-302T-BLD	BE
568-24888-191U-31--568-25075N-302T-BLD	BE	44	loose	568-24888-191U-31--568-25075N-302T-BLD	BE
5693	KIRC	3	loose	5693	KIRC
5695	KIRC	1	loose	5695	KIRC
5723	STAD	13	loose	5723	STAD
5724	STAD	53	loose	5724	STAD
5730	STAD	74	loose	5730	STAD
575-24541-32W-30--575-25019N-181R-BLD	BE	74	loose	575-24541-32W-30--575-25019N-181R-BLD	BE
575-25141-181R-28--575-25019N-181R-BLD	BE	2	loose	575-25141-181R-28--575-25019N-181R-BLD	BE
575-25147-181R-26--575-25019N-181R-BLD	BE	1	loose	575-25147-181R-26--575-25019N-181R-BLD	BE
575-25150-32W-32--575-25019N-181R-BLD	BE	3	loose	575-25150-32W-32--575-25019N-181R-BLD	BE
5799	STAD	65	loose	5799	STAD
57a0663fa71fd2018b62bf8a5a5090b31ca2a7bb834cf056d34a9ec8a9afdff8	ESAD	56	loose	57a0663fa71fd2018b62bf8a5a5090b31ca2a7bb834cf056d34a9ec8a9afdff8	ESAD
5870	LGG	1	loose	5870	LGG
5872	LGG	11	loose	5872	LGG
5874	LGG	3	loose	5874	LGG
5960	GBM	21	loose	5960	GBM
5964	LGG	2	loose	5964	LGG
5987	KIRC	0	loose	5987	KIRC
5a14b5248d76d98bda5dbcd1450b97ed6d6924045908299241f47080e057b505	ESAD	72	loose	5a14b5248d76d98bda5dbcd1450b97ed6d6924045908299241f47080e057b505	ESAD
5a6c12d7e4141588ba41e5a07c2fdf878a57510ea4957fddbe1ce88e51d57864	ESAD	108	loose	5a6c12d7e4141588ba41e5a07c2fdf878a57510ea4957fddbe1ce88e51d57864	ESAD
5b557890e45f2aabf992413035f27efd8083136ab3672325e68f00b2431b6c40	ESAD	37	loose	5b557890e45f2aabf992413035f27efd8083136ab3672325e68f00b2431b6c40	ESAD
5e49d3e75f5a5faefb000800dda151a99cb2efe29603c7437a4a234c88bbb383	ESAD	60	loose	5e49d3e75f5a5faefb000800dda151a99cb2efe29603c7437a4a234c88bbb383	ESAD
6093	KIRC	0	loose	6093	KIRC
6177	STAD	3	loose	6177	STAD
6186	LGG	2	loose	6186	LGG
623-24672-133N-36--623-24959N-133N-GST	BE	1	loose	623-24672-133N-36--623-24959N-133N-GST	BE
625721c0e551208d32de7879e3cb04bb5cfe7573266d5aec45e58e306e186c70	ESAD	36	loose	625721c0e551208d32de7879e3cb04bb5cfe7573266d5aec45e58e306e186c70	ESAD
626-24028-12X-34--626-25079N-194T-BLD	BE	38	loose	626-24028-12X-34--626-25079N-194T-BLD	BE
626-24780-238S-34--626-25079N-194T-BLD	BE	5	loose	626-24780-238S-34--626-25079N-194T-BLD	BE
62d006ea1569dae280707516235efbb551613e782526764b4698ad19e66e1177	ESAD	105	loose	62d006ea1569dae280707516235efbb551613e782526764b4698ad19e66e1177	ESAD
635-24037-159M-30--635-25080N-95V-BLD	BE	8	loose	635-24037-159M-30--635-25080N-95V-BLD	BE
635-24040-164S-33--635-25080N-95V-BLD	BE	4	loose	635-24040-164S-33--635-25080N-95V-BLD	BE
6375459929f5a6320351e3b8851211460359ccde0ca0d7e858aae8fdbdf77d73.2	ESAD	53	loose	6375459929f5a6320351e3b8851211460359ccde0ca0d7e858aae8fdbdf77d73.2	ESAD
6397	LGG	3	loose	6397	LGG
6407	LGG	10	loose	6407	LGG
6452	STAD	6	loose	6452	STAD
6519	STAD	54	loose	6519	STAD
6528	STAD	65	loose	6528	STAD
65563f8e715e1117c73623defb3159d94318f41306526f79f5ba6134f72a925a	ESAD	65	loose	65563f8e715e1117c73623defb3159d94318f41306526f79f5ba6134f72a925a	ESAD
660-24058-213R-33--660-25082N-213R-BLD	BE	173	loose	660-24058-213R-33--660-25082N-213R-BLD	BE
6665	LGG	23	loose	6665	LGG
6668	LGG	2	loose	6668	LGG
6669	LGG	3	loose	6669	LGG
66a2d0738fe38f5b696b89088016921a5ba68467844906a415ad9c13c23f3f82	ESAD	11	loose	66a2d0738fe38f5b696b89088016921a5ba68467844906a415ad9c13c23f3f82	ESAD
6729b31463a1e912fe4187556be5de212ee7150ff1bbe2a9fabe990ef988484e	ESAD	55	loose	6729b31463a1e912fe4187556be5de212ee7150ff1bbe2a9fabe990ef988484e	ESAD
6815	STAD	34	loose	6815	STAD
6822	STAD	80	loose	6822	STAD
6875	STAD	29	loose	6875	STAD
6904b15afae6c2a0b1db92b5722ae54d1806030063ff51e3454e76193b2a5191	ESAD	2	loose	6904b15afae6c2a0b1db92b5722ae54d1806030063ff51e3454e76193b2a5191	ESAD
69f1b2078352cbdee29724b705114ad434578dbfadf5a8df2f82fdf3cde3f72b	ESAD	17	loose	69f1b2078352cbdee29724b705114ad434578dbfadf5a8df2f82fdf3cde3f72b	ESAD
6bb03952b5468708a1d1544dab4e4d542a649c1429f2b8e38877c2bf1abac6d4	ESAD	76	loose	6bb03952b5468708a1d1544dab4e4d542a649c1429f2b8e38877c2bf1abac6d4	ESAD
6c53d8df4b1cabae706250c0eb7a58908a8f12cebf7812218513c0c4633e13c6	ESAD	22	loose	6c53d8df4b1cabae706250c0eb7a58908a8f12cebf7812218513c0c4633e13c6	ESAD
6e6ffd2fababfb900f63401a704f75dd8edd7e063f826d6da01789aa2df983d6	ESAD	68	loose	6e6ffd2fababfb900f63401a704f75dd8edd7e063f826d6da01789aa2df983d6	ESAD
6e8fdfbc1b6673a9e7f0753ee13f672156f7333fac3083316c7f2d2994019053	ESAD	14	loose	6e8fdfbc1b6673a9e7f0753ee13f672156f7333fac3083316c7f2d2994019053	ESAD
7009	LGG	2	loose	7009	LGG
70224ed441451a81fd89f696be5993bde735a85317aeeece976d443a155bb554	ESAD	66	loose	70224ed441451a81fd89f696be5993bde735a85317aeeece976d443a155bb554	ESAD
70224ed441451a81fd89f696be5993bde735a85317aeeece976d443a155bb554.2	ESAD	56	loose	70224ed441451a81fd89f696be5993bde735a85317aeeece976d443a155bb554.2	ESAD
7136	STAD	33	loose	7136	STAD
7264	LGG	2	loose	7264	LGG
729ae39c61839b5c6bb6d8ec86b4e41bd4073cc8fac262bd32732144b1608045	ESAD	16	loose	729ae39c61839b5c6bb6d8ec86b4e41bd4073cc8fac262bd32732144b1608045	ESAD
730015334ef3a709c18445d6ceb35becf86f4fc5635f6117c5ae1646ffea4aee	ESAD	64	loose	730015334ef3a709c18445d6ceb35becf86f4fc5635f6117c5ae1646ffea4aee	ESAD
7301	LGG	6	loose	7301	LGG
7304	LGG	20	loose	7304	LGG
736816540afbfc3e46000e6c943e77f13e5f3c8e590750374d0b01e94448df78	ESAD	18	loose	736816540afbfc3e46000e6c943e77f13e5f3c8e590750374d0b01e94448df78	ESAD
740-24247-138M-36--740-24960N-156N-GST	BE	40	loose	740-24247-138M-36--740-24960N-156N-GST	BE
740-24250-138M-33--740-24960N-156N-GST	BE	15	loose	740-24250-138M-33--740-24960N-156N-GST	BE
740-24253-156N-35--740-24960N-156N-GST	BE	16	loose	740-24253-156N-35--740-24960N-156N-GST	BE
740-24256-156N-33--740-24960N-156N-GST	BE	28	loose	740-24256-156N-33--740-24960N-156N-GST	BE
74854df07d95b6b1a2132579094fef3b8c13e8f81875e20143f4e19e49e5f446	ESAD	59	loose	74854df07d95b6b1a2132579094fef3b8c13e8f81875e20143f4e19e49e5f446	ESAD
7487	LGG	2	loose	7487	LGG
75ce1bd6dbaf2d4ca50f51e6c1f2a09f3275b080539a07ac7ed962ae72c5179f	ESAD	76	loose	75ce1bd6dbaf2d4ca50f51e6c1f2a09f3275b080539a07ac7ed962ae72c5179f	ESAD
7602	LGG	0	loose	7602	LGG
7675	LGG	24	loose	7675	LGG
7689	LGG	22	loose	7689	LGG
7695	LGG	2	loose	7695	LGG
772-24568-116N-34--772-24977N-116N-GST	BE	15	loose	772-24568-116N-34--772-24977N-116N-GST	BE
772-24571-116N-36--772-24977N-116N-GST	BE	25	loose	772-24571-116N-36--772-24977N-116N-GST	BE
772-24577-123K-35--772-24977N-116N-GST	BE	45	loose	772-24577-123K-35--772-24977N-116N-GST	BE
7722	STAD	5	loose	7722	STAD
779-24091-67M-31--779-21582N-67M-GST	BE	10	loose	779-24091-67M-31--779-21582N-67M-GST	BE
779-24094-67M-28--779-21582N-67M-GST	BE	27	loose	779-24094-67M-28--779-21582N-67M-GST	BE
77e647a05a7bc6591ccdaaab2bbdef656649418e52d8f02e6f7f5d63af2f50fb	ESAD	58	loose	77e647a05a7bc6591ccdaaab2bbdef656649418e52d8f02e6f7f5d63af2f50fb	ESAD
7806	STAD	3	loose	7806	STAD
7848bd725874b4f28f5c907834fab039f1c9489938a6d78b770e367be2973da9	ESAD	95	loose	7848bd725874b4f28f5c907834fab039f1c9489938a6d78b770e367be2973da9	ESAD
7bc2eb9cbd76f57405c4db1820c587932da2dc3bc5396e612eaa68aec71f434d	ESAD	19	loose	7bc2eb9cbd76f57405c4db1820c587932da2dc3bc5396e612eaa68aec71f434d	ESAD
7c965565bb8202941bbc7995e015807e3817397353b46aed7fafd568ec445009	ESAD	174	loose	7c965565bb8202941bbc7995e015807e3817397353b46aed7fafd568ec445009	ESAD
7e5fe54682f97841fdf2cea1ac5a3a9b0944e8de6a5bab414be5953e4a122203	ESAD	203	loose	7e5fe54682f97841fdf2cea1ac5a3a9b0944e8de6a5bab414be5953e4a122203	ESAD
8041	MALY	5	loose	8041	MALY
8042	MALY	27	loose	8042	MALY
8043	MALY	41	loose	8043	MALY
8047	MALY	10	loose	8047	MALY
806-24154-225T-37--806-25035N-53S-BLD	BE	2	loose	806-24154-225T-37--806-25035N-53S-BLD	BE
806-24157-70V-34--806-25035N-53S-BLD	BE	2	loose	806-24157-70V-34--806-25035N-53S-BLD	BE
8104	LGG	11	loose	8104	LGG
815b14fc82802994d6234dbab1f4acf7fd67c3a1dc2c7b23418c82c61f08e91e	ESAD	67	loose	815b14fc82802994d6234dbab1f4acf7fd67c3a1dc2c7b23418c82c61f08e91e	ESAD
8182	LGG	13	loose	8182	LGG
8245	STAD	19	loose	8245	STAD
826cb806c36242e06bda2a676b65446bc82ef365e10148aa36baec0b1afa872c	ESAD	68	loose	826cb806c36242e06bda2a676b65446bc82ef365e10148aa36baec0b1afa872c	ESAD
8323	KICH	8	loose	8323	KICH
8325	KICH	0	loose	8325	KICH
8327	KICH	1	loose	8327	KICH
8328	KICH	6	loose	8328	KICH
8330	KICH	0	loose	8330	KICH
8331	KICH	2	loose	8331	KICH
8332	KICH	0	loose	8332	KICH
8334	KICH	0	loose	8334	KICH
8337	KICH	1	loose	8337	KICH
8340	KICH	0	loose	8340	KICH
8341	KICH	45	loose	8341	KICH
8342	KICH	0	loose	8342	KICH
8343	KICH	0	loose	8343	KICH
8344	KICH	0	loose	8344	KICH
8346	KICH	0	loose	8346	KICH
8373	STAD	54	loose	8373	STAD
8381	STAD	4	loose	8381	STAD
83e5f80b1c797b84fc0cb2cd64de1f93ba161fc7250d6638f1cfcdbfd8cbb1b6	ESAD	26	loose	83e5f80b1c797b84fc0cb2cd64de1f93ba161fc7250d6638f1cfcdbfd8cbb1b6	ESAD
8406	KICH	0	loose	8406	KICH
8407	KICH	0	loose	8407	KICH
8410	KICH	1	loose	8410	KICH
8411	KICH	0	loose	8411	KICH
8416	KICH	0	loose	8416	KICH
8417	KICH	0	loose	8417	KICH
8418	KICH	1	loose	8418	KICH
8422	KICH	1	loose	8422	KICH
8424	KICH	4	loose	8424	KICH
8425	KICH	0	loose	8425	KICH
8426	KICH	11	loose	8426	KICH
8427	KICH	10	loose	8427	KICH
8428	KICH	26	loose	8428	KICH
8429	KICH	1	loose	8429	KICH
8430	KICH	0	loose	8430	KICH
8431	KICH	0	loose	8431	KICH
8432	KICH	1	loose	8432	KICH
8434	KICH	1	loose	8434	KICH
8435	KICH	9	loose	8435	KICH
8438	KICH	0	loose	8438	KICH
8440	KICH	2	loose	8440	KICH
8442	KICH	0	loose	8442	KICH
8443	KICH	43	loose	8443	KICH
8476	KICH	0	loose	8476	KICH
8477	KICH	0	loose	8477	KICH
85b73e9079e9cd6fd8efd465a1d7cb632075eebd61536049e6e3b9b3e2fd661a	ESAD	86	loose	85b73e9079e9cd6fd8efd465a1d7cb632075eebd61536049e6e3b9b3e2fd661a	ESAD
86c633a436916422e25c43063f1d8fde99dfbcb303747adcce0d3da8cc1c3183	ESAD	20	loose	86c633a436916422e25c43063f1d8fde99dfbcb303747adcce0d3da8cc1c3183	ESAD
875bfbff4c31a068c9824c557541698eea34f069a333d8aec6d2e6645a73d2fd	ESAD	28	loose	875bfbff4c31a068c9824c557541698eea34f069a333d8aec6d2e6645a73d2fd	ESAD
88-23692-18U-36--88-24991N-123S-BLD	BE	1	loose	88-23692-18U-36--88-24991N-123S-BLD	BE
88-23695-18U-35--88-24991N-123S-BLD	BE	3	loose	88-23695-18U-35--88-24991N-123S-BLD	BE
887c41c3bf89e0fe6d721f4407b024294f01af4937a412310681db9e9bb57e8c	ESAD	63	loose	887c41c3bf89e0fe6d721f4407b024294f01af4937a412310681db9e9bb57e8c	ESAD
891-24604-309R-31--891-25041N-75P-BLD	BE	13	loose	891-24604-309R-31--891-25041N-75P-BLD	BE
89bab9e7f417efbc02ba5fbf3fe14630c12cbbfde41420e1e822417f0ca843ad	ESAD	37	loose	89bab9e7f417efbc02ba5fbf3fe14630c12cbbfde41420e1e822417f0ca843ad	ESAD
8cf58ec6aefc914022d30014ad2091b33ec3a4ee841d22ed964ec8d7ff515e61	ESAD	61	loose	8cf58ec6aefc914022d30014ad2091b33ec3a4ee841d22ed964ec8d7ff515e61	ESAD
8debf2cb55d0f1b7011f183b83cc855caf6f06cbde5d34ff4449ac79b9f1abfb	ESAD	45	loose	8debf2cb55d0f1b7011f183b83cc855caf6f06cbde5d34ff4449ac79b9f1abfb	ESAD
8e4d0a4d30896e13a46ec1a156fd004b325aebb89e2a4bdcfce0d17f24356900	ESAD	55	loose	8e4d0a4d30896e13a46ec1a156fd004b325aebb89e2a4bdcfce0d17f24356900	ESAD
8eaf6e7cd7af4825a2dcaebc5dd3897ce05b6bc1e6b642e278059b92a8e3fe83	ESAD	33	loose	8eaf6e7cd7af4825a2dcaebc5dd3897ce05b6bc1e6b642e278059b92a8e3fe83	ESAD
8ec9d907cdf12c3184889dbeded8466994a0cf8ce6aa8dea3d74eb94eaa238cc	ESAD	48	loose	8ec9d907cdf12c3184889dbeded8466994a0cf8ce6aa8dea3d74eb94eaa238cc	ESAD
900fdae05c90e27aba521996cc05d0a83e32dec27c271a8f14e59fa84439ed34	ESAD	88	loose	900fdae05c90e27aba521996cc05d0a83e32dec27c271a8f14e59fa84439ed34	ESAD
909-24523-161W-36--909-25086N-9U-BLD	BE	5	loose	909-24523-161W-36--909-25086N-9U-BLD	BE
909-24529-41G-36--909-25086N-9U-BLD	BE	2	loose	909-24529-41G-36--909-25086N-9U-BLD	BE
909-24831-105U-35--909-25086N-9U-BLD	BE	0	loose	909-24831-105U-35--909-25086N-9U-BLD	BE
911-24619-11Y-25--911-25044N-6X-BLD	BE	4	loose	911-24619-11Y-25--911-25044N-6X-BLD	BE
913ce613b66ab4f7fda444db13933c39c689bef153aaa1cbe05db00e4aa7a1a4	ESAD	56	loose	913ce613b66ab4f7fda444db13933c39c689bef153aaa1cbe05db00e4aa7a1a4	ESAD
91b806330d0e632a29aac57bb4c22564728a6732fc25d7393a6075cc86ec86d8	ESAD	75	loose	91b806330d0e632a29aac57bb4c22564728a6732fc25d7393a6075cc86ec86d8	ESAD
929bd4be9261b766fed4e9b6eb5dc4ba79d4f9b74e9b2c36f23398835215b95a	ESAD	27	loose	929bd4be9261b766fed4e9b6eb5dc4ba79d4f9b74e9b2c36f23398835215b95a	ESAD
92e63aeec5d5bfb17bdf90ebb4da303a859f9d663ef931cdd8fc89ec4d807919	ESAD	10	loose	92e63aeec5d5bfb17bdf90ebb4da303a859f9d663ef931cdd8fc89ec4d807919	ESAD
932be781385ee8928b7497f31bc76e2d39794e65797f0afed7f025f46f63de04	ESAD	20	loose	932be781385ee8928b7497f31bc76e2d39794e65797f0afed7f025f46f63de04	ESAD
934fe84809fc20a81f124747d5ed57817eb0f9120ea63a69a1548d514710978f	ESAD	66	loose	934fe84809fc20a81f124747d5ed57817eb0f9120ea63a69a1548d514710978f	ESAD
942-24906-18X-38--942-25046N-166T-BLD	BE	3	loose	942-24906-18X-38--942-25046N-166T-BLD	BE
94c34e2475b3d421a3a49b49b8ef2fe278718a688445204887a53b76c720895e	ESAD	23	loose	94c34e2475b3d421a3a49b49b8ef2fe278718a688445204887a53b76c720895e	ESAD
954-24205-298T-35--954-25048N-259T-BLD	BE	41	loose	954-24205-298T-35--954-25048N-259T-BLD	BE
954-24208-298T-34--954-25048N-259T-BLD	BE	31	loose	954-24208-298T-34--954-25048N-259T-BLD	BE
954-24220-219U-34--954-25048N-259T-BLD	BE	34	loose	954-24220-219U-34--954-25048N-259T-BLD	BE
96abdb3df8257963934d256627e830afd34b535b61f1caff482994f8f85dbece	ESAD	41	loose	96abdb3df8257963934d256627e830afd34b535b61f1caff482994f8f85dbece	ESAD
97a8da910044868e4b93f3bc66de54f863428a22b72f8e8c8896d562f7c970c3	ESAD	24	loose	97a8da910044868e4b93f3bc66de54f863428a22b72f8e8c8896d562f7c970c3	ESAD
98011f8fb58fa8eed6171691d09d2ac7c67eb943046e45f70c47352c3a559887	ESAD	10	loose	98011f8fb58fa8eed6171691d09d2ac7c67eb943046e45f70c47352c3a559887	ESAD
995-24136-91W-31--995-25053N-119V-BLD	BE	37	loose	995-24136-91W-31--995-25053N-119V-BLD	BE
997-24592-142W-30--997-25054N-122V-BLD	BE	58	loose	997-24592-142W-30--997-25054N-122V-BLD	BE
997-24595-142W-33--997-25054N-122V-BLD	BE	25	loose	997-24595-142W-33--997-25054N-122V-BLD	BE
997-24598-184V-29--997-25054N-122V-BLD	BE	30	loose	997-24598-184V-29--997-25054N-122V-BLD	BE
997-24601-184V-32--997-25054N-122V-BLD	BE	29	loose	997-24601-184V-32--997-25054N-122V-BLD	BE
99febb5cb49a8d0e47fc43cb46c3c972af7077adde2b38b1919c294276ef563e	ESAD	59	loose	99febb5cb49a8d0e47fc43cb46c3c972af7077adde2b38b1919c294276ef563e	ESAD
9aa3acd19da6ad36a8206d2dc11b4e8f54a1ba392aa4ae6ef853a174f016ab8d	ESAD	1	loose	9aa3acd19da6ad36a8206d2dc11b4e8f54a1ba392aa4ae6ef853a174f016ab8d	ESAD
9bede39d73b7a98225f1f8ea85d513c1739d6c55a43f8b284a41a49ec0c9a9df	ESAD	10	loose	9bede39d73b7a98225f1f8ea85d513c1739d6c55a43f8b284a41a49ec0c9a9df	ESAD
A032	COAD	15	loose	A032	COAD
A051	UCEC	1	loose	A051	UCEC
A052	UCEC	87	loose	A052	UCEC
A053	UCEC	48	loose	A053	UCEC
A054	UCEC	5	loose	A054	UCEC
A05A	UCEC	28	loose	A05A	UCEC
A05D	UCEC	61	loose	A05D	UCEC
A07I	BRCA	58	loose	A07I	BRCA
A0C8	BLCA	86	loose	A0C8	BLCA
A0CA	UCEC	0	loose	A0CA	UCEC
A0CC	UCEC	72	loose	A0CC	UCEC
A0CE	BRCA	39	loose	A0CE	BRCA
A0D0	BRCA	84	loose	A0D0	BRCA
A0D4	BRCA	29	loose	A0D4	BRCA
A0G0	BRCA	185	loose	A0G0	BRCA
A0G9	UCEC	1	loose	A0G9	UCEC
A0GJ	UCEC	343	loose	A0GJ	UCEC
A0J1	UCEC	5	loose	A0J1	UCEC
A0JM	BRCA	42	loose	A0JM	BRCA
A0JN	UCEC	113	loose	A0JN	UCEC
A0K8	UCEC	75	loose	A0K8	UCEC
A0L8	UCEC	21	loose	A0L8	UCEC
A0L9	UCEC	108	loose	A0L9	UCEC
A0LD	UCEC	13	loose	A0LD	UCEC
A0LH	UCEC	77	loose	A0LH	UCEC
A0LO	UCEC	6	loose	A0LO	UCEC
A0TC	UCEC	0	loose	A0TC	UCEC
A0TD	UCEC	4	loose	A0TD	UCEC
A0TE	UCEC	17	loose	A0TE	UCEC
A0TN	CESC	12	loose	A0TN	CESC
A0V8	UCEC	58	loose	A0V8	UCEC
A0VL	CESC	28	loose	A0VL	CESC
A109	BRCA	89	loose	A109	BRCA
A11G	UCEC	13	loose	A11G	UCEC
A11H	UCEC	6	loose	A11H	UCEC
A12L	BRCA	73	loose	A12L	BRCA
A13J	BLCA	83	loose	A13J	BLCA
A148	MELA	20	loose	A148	MELA
A152	BRCA	54	loose	A152	BRCA
A17K	UCEC	16	loose	A17K	UCEC
A18C	UCEC	13	loose	A18C	UCEC
A19D	MELA	5	loose	A19D	MELA
A1A5	BLCA	97	loose	A1A5	BLCA
A1A6	BLCA	72	loose	A1A6	BLCA
A1A7	BLCA	141	loose	A1A7	BLCA
A1AY	BRCA	17	loose	A1AY	BRCA
A1BF	CESC	9	loose	A1BF	CESC
A1BN	CESC	31	loose	A1BN	CESC
A1CI	UCEC	2	loose	A1CI	UCEC
A1GS	UCEC	49	loose	A1GS	UCEC
A1GW	UCEC	9	loose	A1GW	UCEC
A1I0	MELA	43	loose	A1I0	MELA
A1KW	SARC	100	loose	A1KW	SARC
A1L0	SARC	325	loose	A1L0	SARC
A1L2	SARC	141	loose	A1L2	SARC
A1L3	SARC	81	loose	A1L3	SARC
A1LK	BRCA	94	loose	A1LK	BRCA
A1M8	CESC	15	loose	A1M8	CESC
A1M9	CESC	5	loose	A1M9	CESC
A1MI	CESC	7	loose	A1MI	CESC
A1ML	CESC	4	loose	A1ML	CESC
A1MY	UCEC	46	loose	A1MY	UCEC
A1NN	UCEC	51	loose	A1NN	UCEC
A1Q1	MELA	49	loose	A1Q1	MELA
A1Q5	MELA	26	loose	A1Q5	MELA
A1Y8	UCEC	74	loose	A1Y8	UCEC
A1ZD	MELA	26	loose	A1ZD	MELA
A1ZP	MELA	13	loose	A1ZP	MELA
A20P	BLCA	31	loose	A20P	BLCA
A20T	BLCA	31	loose	A20T	BLCA
A20V	BLCA	97	loose	A20V	BLCA
A240	SARC	64	loose	A240	SARC
A26L	UCEC	103	loose	A26L	UCEC
A27C	BLCA	7	loose	A27C	BLCA
A27F	BRCA	22	loose	A27F	BRCA
A29B	MELA	8	loose	A29B	MELA
A2C5	BLCA	79	loose	A2C5	BLCA
A2H5	UCEC	82	loose	A2H5	UCEC
A2HQ	BLCA	59	loose	A2HQ	BLCA
A2IZ	SARC	90	loose	A2IZ	SARC
A2J0	SARC	125	loose	A2J0	SARC
A2J4	SARC	22	loose	A2J4	SARC
A2KJ	CESC	53	loose	A2KJ	CESC
A2LA	BLCA	80	loose	A2LA	BLCA
A2LK	BRCA	10	loose	A2LK	BRCA
A2LT	CESC	14	loose	A2LT	CESC
A2LV	CESC	32	loose	A2LV	CESC
A2M5	MELA	13	loose	A2M5	MELA
A2PK	CESC	8	loose	A2PK	CESC
A2RL	CESC	23	loose	A2RL	CESC
A2RM	CESC	54	loose	A2RM	CESC
A3IL	BLCA	34	loose	A3IL	BLCA
A3K7	SARC	42	loose	A3K7	SARC
A3KA	SARC	122	loose	A3KA	SARC
A3LT	SARC	101	loose	A3LT	SARC
A3LU	SARC	37	loose	A3LU	SARC
A3LW	SARC	67	loose	A3LW	SARC
A3LY	SARC	238	loose	A3LY	SARC
A3M1	SARC	325	loose	A3M1	SARC
A3M4	SARC	5	loose	A3M4	SARC
A3M5	SARC	51	loose	A3M5	SARC
A3MF	BLCA	6	loose	A3MF	BLCA
A3N5	BLCA	41	loose	A3N5	BLCA
A3N6	BLCA	4	loose	A3N6	BLCA
A3NJ	SARC	3	loose	A3NJ	SARC
A3PH	BLCA	25	loose	A3PH	BLCA
A3PJ	BLCA	70	loose	A3PJ	BLCA
A3PN	SARC	8	loose	A3PN	SARC
A3RE	SARC	30	loose	A3RE	SARC
A3U5	SARC	138	loose	A3U5	SARC
A3U6	SARC	39	loose	A3U6	SARC
A3U7	SARC	134	loose	A3U7	SARC
A3XL	BRCA	81	loose	A3XL	BRCA
A40Y	KIRP	5	loose	A40Y	KIRP
A43Z	SARC	67	loose	A43Z	SARC
A44B	KIRP	9	loose	A44B	KIRP
A47M	KIRP	1	loose	A47M	KIRP
A47R	SARC	26	loose	A47R	SARC
A48G	SARC	122	loose	A48G	SARC
A48U	SARC	11	loose	A48U	SARC
A4AJ	SARC	40	loose	A4AJ	SARC
A4EI	SARC	17	loose	A4EI	SARC
A4EK	SARC	1	loose	A4EK	SARC
A4G6	STAD	7	loose	A4G6	STAD
A4YX	STAD	7	loose	A4YX	STAD
A4ZT	KIRP	1	loose	A4ZT	KIRP
A560	KIRP	0	loose	A560	KIRP
A57E	KIRP	6	loose	A57E	KIRP
A5DJ	KIRP	6	loose	A5DJ	KIRP
A5NI	KIRP	0	loose	A5NI	KIRP
A5NJ	KIRP	4	loose	A5NJ	KIRP
A5NL	KIRP	0	loose	A5NL	KIRP
A5R7	LGG	23	loose	A5R7	LGG
A5W3	SARC	29	loose	A5W3	SARC
A61B	LGG	46	loose	A61B	LGG
A6IA	SARC	55	loose	A6IA	SARC
A6Z2	SARC	20	loose	A6Z2	SARC
A7RK	LGG	18	loose	A7RK	LGG
A7RV	LGG	10	loose	A7RV	LGG
A95T	SARC	24	loose	A95T	SARC
A9GB	SARC	54	loose	A9GB	SARC
EGAN00001000368_EGAN00001000372	BRCA	44	loose	EGAN00001000368_EGAN00001000372	BRCA
EGAN00001000386_EGAN00001000380	BRCA	71	loose	EGAN00001000386_EGAN00001000380	BRCA
EGAN00001000588_EGAN00001000589	BRCA	39	loose	EGAN00001000588_EGAN00001000589	BRCA
EGAN00001000592_EGAN00001000593	BRCA	23	loose	EGAN00001000592_EGAN00001000593	BRCA
EGAN00001000594_EGAN00001000595	BRCA	199	loose	EGAN00001000594_EGAN00001000595	BRCA
EGAN00001000596_EGAN00001000597	BRCA	62	loose	EGAN00001000596_EGAN00001000597	BRCA
EGAN00001000745_EGAN00001000746	BRCA	52	loose	EGAN00001000745_EGAN00001000746	BRCA
EGAN00001001177_EGAN00001000752	BRCA	58	loose	EGAN00001001177_EGAN00001000752	BRCA
EGAN00001018603_EGAN00001018604	BRCA	39	loose	EGAN00001018603_EGAN00001018604	BRCA
EGAN00001018607_EGAN00001018608	BRCA	72	loose	EGAN00001018607_EGAN00001018608	BRCA
EGAN00001018611_EGAN00001018612	BRCA	51	loose	EGAN00001018611_EGAN00001018612	BRCA
EGAN00001030465_EGAN00001030466	BRCA	224	loose	EGAN00001030465_EGAN00001030466	BRCA
EGAN00001030469_EGAN00001030470	BRCA	44	loose	EGAN00001030469_EGAN00001030470	BRCA
EGAN00001030778_EGAN00001030894	BRCA	60	loose	EGAN00001030778_EGAN00001030894	BRCA
EGAN00001030890_EGAN00001030891	BRCA	82	loose	EGAN00001030890_EGAN00001030891	BRCA
EGAN00001030897_EGAN00001030898	BRCA	12	loose	EGAN00001030897_EGAN00001030898	BRCA
EGAN00001036482_EGAN00001036483	BRCA	11	loose	EGAN00001036482_EGAN00001036483	BRCA
EGAN00001269437_EGAN00001269438	BRCA	4	loose	EGAN00001269437_EGAN00001269438	BRCA
EGAN00001269439_EGAN00001269440	BRCA	7	loose	EGAN00001269439_EGAN00001269440	BRCA
EGAN00001269441_EGAN00001269442	BRCA	41	loose	EGAN00001269441_EGAN00001269442	BRCA
EGAN00001269443_EGAN00001269444	BRCA	1	loose	EGAN00001269443_EGAN00001269444	BRCA
EGAN00001269445_EGAN00001269446	BRCA	71	loose	EGAN00001269445_EGAN00001269446	BRCA
EGAN00001269459_EGAN00001269460	BRCA	4	loose	EGAN00001269459_EGAN00001269460	BRCA
EGAN00001269463_EGAN00001269464	BRCA	175	loose	EGAN00001269463_EGAN00001269464	BRCA
EGAN00001269467_EGAN00001269468	BRCA	2	loose	EGAN00001269467_EGAN00001269468	BRCA
EGAN00001269469_EGAN00001269470	BRCA	28	loose	EGAN00001269469_EGAN00001269470	BRCA
EGAN00001269473_EGAN00001269474	BRCA	72	loose	EGAN00001269473_EGAN00001269474	BRCA
EGAN00001269475_EGAN00001269476	BRCA	89	loose	EGAN00001269475_EGAN00001269476	BRCA
EGAN00001269483_EGAN00001269484	BRCA	60	loose	EGAN00001269483_EGAN00001269484	BRCA
EGAN00001269485_EGAN00001269486	BRCA	68	loose	EGAN00001269485_EGAN00001269486	BRCA
EGAN00001269493_EGAN00001269494	BRCA	53	loose	EGAN00001269493_EGAN00001269494	BRCA
EGAN00001269497_EGAN00001269498	BRCA	16	loose	EGAN00001269497_EGAN00001269498	BRCA
EGAN00001269503_EGAN00001269504	BRCA	24	loose	EGAN00001269503_EGAN00001269504	BRCA
EGAN00001269505_EGAN00001269506	BRCA	27	loose	EGAN00001269505_EGAN00001269506	BRCA
EGAN00001269509_EGAN00001269510	BRCA	7	loose	EGAN00001269509_EGAN00001269510	BRCA
EGAN00001269511_EGAN00001269512	BRCA	39	loose	EGAN00001269511_EGAN00001269512	BRCA
EGAN00001269521_EGAN00001269522	BRCA	4	loose	EGAN00001269521_EGAN00001269522	BRCA
EGAN00001269523_EGAN00001269524	BRCA	24	loose	EGAN00001269523_EGAN00001269524	BRCA
EGAN00001269525_EGAN00001269526	BRCA	0	loose	EGAN00001269525_EGAN00001269526	BRCA
EGAN00001269527_EGAN00001269528	BRCA	77	loose	EGAN00001269527_EGAN00001269528	BRCA
EGAN00001269531_EGAN00001269532	BRCA	57	loose	EGAN00001269531_EGAN00001269532	BRCA
EGAN00001269533_EGAN00001269534	BRCA	3	loose	EGAN00001269533_EGAN00001269534	BRCA
EGAN00001269543_EGAN00001269544	BRCA	3	loose	EGAN00001269543_EGAN00001269544	BRCA
EGAN00001269547_EGAN00001269548	BRCA	16	loose	EGAN00001269547_EGAN00001269548	BRCA
EGAN00001269549_EGAN00001269550	BRCA	209	loose	EGAN00001269549_EGAN00001269550	BRCA
EGAN00001269551_EGAN00001269552	BRCA	48	loose	EGAN00001269551_EGAN00001269552	BRCA
EGAN00001269553_EGAN00001269554	BRCA	1	loose	EGAN00001269553_EGAN00001269554	BRCA
EGAN00001269561_EGAN00001269562	BRCA	19	loose	EGAN00001269561_EGAN00001269562	BRCA
EGAN00001269565_EGAN00001269566	BRCA	58	loose	EGAN00001269565_EGAN00001269566	BRCA
EGAN00001269567_EGAN00001269568	BRCA	2	loose	EGAN00001269567_EGAN00001269568	BRCA
EGAN00001269569_EGAN00001269570	BRCA	46	loose	EGAN00001269569_EGAN00001269570	BRCA
EGAN00001269575_EGAN00001269576	BRCA	50	loose	EGAN00001269575_EGAN00001269576	BRCA
EGAN00001269577_EGAN00001269578	BRCA	29	loose	EGAN00001269577_EGAN00001269578	BRCA
EGAN00001269579_EGAN00001269580	BRCA	172	loose	EGAN00001269579_EGAN00001269580	BRCA
EGAN00001269581_EGAN00001269582	BRCA	80	loose	EGAN00001269581_EGAN00001269582	BRCA
EGAN00001269583_EGAN00001269584	BRCA	5	loose	EGAN00001269583_EGAN00001269584	BRCA
EGAN00001269589_EGAN00001269590	BRCA	18	loose	EGAN00001269589_EGAN00001269590	BRCA
EGAN00001269593_EGAN00001269594	BRCA	31	loose	EGAN00001269593_EGAN00001269594	BRCA
EGAN00001269603_EGAN00001269604	BRCA	75	loose	EGAN00001269603_EGAN00001269604	BRCA
EGAN00001269605_EGAN00001269606	BRCA	47	loose	EGAN00001269605_EGAN00001269606	BRCA
EGAN00001269607_EGAN00001269608	BRCA	84	loose	EGAN00001269607_EGAN00001269608	BRCA
EGAN00001269609_EGAN00001269610	BRCA	22	loose	EGAN00001269609_EGAN00001269610	BRCA
EGAN00001269613_EGAN00001269614	BRCA	141	loose	EGAN00001269613_EGAN00001269614	BRCA
EGAN00001269621_EGAN00001269622	BRCA	54	loose	EGAN00001269621_EGAN00001269622	BRCA
EGAN00001269627_EGAN00001269628	BRCA	125	loose	EGAN00001269627_EGAN00001269628	BRCA
EGAN00001269629_EGAN00001269630	BRCA	6	loose	EGAN00001269629_EGAN00001269630	BRCA
EGAN00001269631_EGAN00001269632	BRCA	61	loose	EGAN00001269631_EGAN00001269632	BRCA
LU-42	LUAD	0	loose	LU-42	LUAD
LU-69	LUAD	80	loose	LU-69	LUAD
LU-89	LUAD	15	loose	LU-89	LUAD
LU-F13	LUAD	13	loose	LU-F13	LUAD
LU-F2	LUAD	0	loose	LU-F2	LUAD
LU-F6	LUAD	3	loose	LU-F6	LUAD
LU-FF24	LUAD	43	loose	LU-FF24	LUAD
LU-FF34	LUAD	7	loose	LU-FF34	LUAD
LU-FF37	LUAD	2	loose	LU-FF37	LUAD
LU-FF4	LUAD	17	loose	LU-FF4	LUAD
LU-FF58	LUAD	0	loose	LU-FF58	LUAD
LU-FF62	LUAD	63	loose	LU-FF62	LUAD
LU-FF67	LUAD	7	loose	LU-FF67	LUAD
LU-FF71	LUAD	0	loose	LU-FF71	LUAD
LU-FF77	LUAD	7	loose	LU-FF77	LUAD
LU-FF78	LUAD	14	loose	LU-FF78	LUAD
MELA_0001	MELA	237	loose	MELA_0001	MELA
MELA_0002	MELA	134	loose	MELA_0002	MELA
MELA_0003	MELA	68	loose	MELA_0003	MELA
MELA_0004	MELA	80	loose	MELA_0004	MELA
MELA_0005	MELA	83	loose	MELA_0005	MELA
MELA_0006	MELA	49	loose	MELA_0006	MELA
MELA_0007	MELA	102	loose	MELA_0007	MELA
MELA_0008	MELA	84	loose	MELA_0008	MELA
MELA_0010	MELA	101	loose	MELA_0010	MELA
MELA_0011	MELA	210	loose	MELA_0011	MELA
MELA_0012	MELA	149	loose	MELA_0012	MELA
MELA_0014	MELA	142	loose	MELA_0014	MELA
MELA_0015	MELA	33	loose	MELA_0015	MELA
MELA_0016	MELA	12	loose	MELA_0016	MELA
MELA_0022	MELA	8	loose	MELA_0022	MELA
MELA_0028	MELA	45	loose	MELA_0028	MELA
MELA_0029	MELA	13	loose	MELA_0029	MELA
MELA_0030	MELA	114	loose	MELA_0030	MELA
MELA_0034	MELA	3	loose	MELA_0034	MELA
MELA_0035	MELA	13	loose	MELA_0035	MELA
MELA_0037	MELA	8	loose	MELA_0037	MELA
MELA_0039	MELA	1	loose	MELA_0039	MELA
MELA_0041	MELA	10	loose	MELA_0041	MELA
MELA_0043	MELA	17	loose	MELA_0043	MELA
MELA_0044	MELA	26	loose	MELA_0044	MELA
MELA_0047	MELA	12	loose	MELA_0047	MELA
MELA_0048	MELA	78	loose	MELA_0048	MELA
MELA_0049	MELA	15	loose	MELA_0049	MELA
MELA_0050	MELA	33	loose	MELA_0050	MELA
MELA_0052	MELA	61	loose	MELA_0052	MELA
MELA_0055	MELA	36	loose	MELA_0055	MELA
MELA_0057	MELA	107	loose	MELA_0057	MELA
MELA_0058	MELA	56	loose	MELA_0058	MELA
MELA_0059	MELA	247	loose	MELA_0059	MELA
MELA_0061	MELA	27	loose	MELA_0061	MELA
MELA_0063	MELA	10	loose	MELA_0063	MELA
MELA_0064	MELA	136	loose	MELA_0064	MELA
MELA_0065	MELA	96	loose	MELA_0065	MELA
MELA_0067	MELA	47	loose	MELA_0067	MELA
MELA_0068	MELA	21	loose	MELA_0068	MELA
MELA_0069	MELA	101	loose	MELA_0069	MELA
MELA_0070	MELA	73	loose	MELA_0070	MELA
MELA_0071	MELA	79	loose	MELA_0071	MELA
MELA_0072	MELA	25	loose	MELA_0072	MELA
MELA_0075	MELA	7	loose	MELA_0075	MELA
MELA_0076	MELA	7	loose	MELA_0076	MELA
MELA_0078	MELA	13	loose	MELA_0078	MELA
MELA_0080	MELA	2	loose	MELA_0080	MELA
MELA_0081	MELA	116	loose	MELA_0081	MELA
MELA_0082	MELA	7	loose	MELA_0082	MELA
MELA_0083	MELA	6	loose	MELA_0083	MELA
MELA_0098	MELA	69	loose	MELA_0098	MELA
MELA_0102	MELA	32	loose	MELA_0102	MELA
MELA_0103	MELA	31	loose	MELA_0103	MELA
MELA_0104	MELA	19	loose	MELA_0104	MELA
MELA_0105	MELA	10	loose	MELA_0105	MELA
MELA_0107	MELA	53	loose	MELA_0107	MELA
MELA_0108	MELA	9	loose	MELA_0108	MELA
MELA_0110	MELA	12	loose	MELA_0110	MELA
MELA_0114	MELA	51	loose	MELA_0114	MELA
MELA_0116	MELA	17	loose	MELA_0116	MELA
MELA_0118	MELA	21	loose	MELA_0118	MELA
MELA_0119	MELA	25	loose	MELA_0119	MELA
MELA_0121	MELA	17	loose	MELA_0121	MELA
MELA_0122	MELA	24	loose	MELA_0122	MELA
MELA_0135	MELA	19	loose	MELA_0135	MELA
MELA_0160	MELA	38	loose	MELA_0160	MELA
MELA_0161	MELA	38	loose	MELA_0161	MELA
MELA_0163	MELA	32	loose	MELA_0163	MELA
MELA_0164	MELA	38	loose	MELA_0164	MELA
MELA_0166	MELA	62	loose	MELA_0166	MELA
MELA_0167	MELA	37	loose	MELA_0167	MELA
MELA_0168	MELA	18	loose	MELA_0168	MELA
MELA_0170	MELA	17	loose	MELA_0170	MELA
MELA_0174	MELA	14	loose	MELA_0174	MELA
MELA_0176	MELA	31	loose	MELA_0176	MELA
MELA_0177	MELA	11	loose	MELA_0177	MELA
MELA_0178	MELA	60	loose	MELA_0178	MELA
MELA_0179	MELA	13	loose	MELA_0179	MELA
MELA_0181	MELA	20	loose	MELA_0181	MELA
MELA_0182	MELA	6	loose	MELA_0182	MELA
MELA_0183	MELA	50	loose	MELA_0183	MELA
MELA_0185	MELA	11	loose	MELA_0185	MELA
MELA_0187	MELA	33	loose	MELA_0187	MELA
MELA_0188	MELA	12	loose	MELA_0188	MELA
MELA_0190	MELA	2	loose	MELA_0190	MELA
MELA_0192	MELA	17	loose	MELA_0192	MELA
MELA_0193	MELA	100	loose	MELA_0193	MELA
MELA_0195	MELA	18	loose	MELA_0195	MELA
MELA_0196	MELA	17	loose	MELA_0196	MELA
MELA_0197	MELA	17	loose	MELA_0197	MELA
MELA_0199	MELA	23	loose	MELA_0199	MELA
MELA_0201	MELA	29	loose	MELA_0201	MELA
MELA_0202	MELA	24	loose	MELA_0202	MELA
MELA_0203	MELA	7	loose	MELA_0203	MELA
MELA_0204	MELA	6	loose	MELA_0204	MELA
MELA_0205	MELA	5	loose	MELA_0205	MELA
MELA_0206	MELA	80	loose	MELA_0206	MELA
MELA_0207	MELA	5	loose	MELA_0207	MELA
MELA_0210	MELA	6	loose	MELA_0210	MELA
MELA_0211	MELA	8	loose	MELA_0211	MELA
MELA_0212	MELA	6	loose	MELA_0212	MELA
MELA_0214	MELA	9	loose	MELA_0214	MELA
MELA_0215	MELA	21	loose	MELA_0215	MELA
MELA_0216	MELA	8	loose	MELA_0216	MELA
MELA_0218	MELA	2	loose	MELA_0218	MELA
MELA_0220	MELA	5	loose	MELA_0220	MELA
MELA_0221	MELA	56	loose	MELA_0221	MELA
MELA_0222	MELA	0	loose	MELA_0222	MELA
MELA_0223	MELA	45	loose	MELA_0223	MELA
MELA_0225	MELA	63	loose	MELA_0225	MELA
MELA_0227	MELA	17	loose	MELA_0227	MELA
MELA_0230	MELA	52	loose	MELA_0230	MELA
MELA_0231	MELA	366	loose	MELA_0231	MELA
MELA_0232	MELA	7	loose	MELA_0232	MELA
MELA_0234	MELA	33	loose	MELA_0234	MELA
MELA_0236	MELA	7	loose	MELA_0236	MELA
MELA_0237	MELA	5	loose	MELA_0237	MELA
MELA_0238	MELA	19	loose	MELA_0238	MELA
MELA_0239	MELA	16	loose	MELA_0239	MELA
MELA_0240	MELA	25	loose	MELA_0240	MELA
MELA_0243	MELA	13	loose	MELA_0243	MELA
MELA_0244	MELA	14	loose	MELA_0244	MELA
MELA_0250	MELA	11	loose	MELA_0250	MELA
MELA_0251	MELA	27	loose	MELA_0251	MELA
MELA_0253	MELA	25	loose	MELA_0253	MELA
MELA_0254	MELA	25	loose	MELA_0254	MELA
MELA_0255	MELA	16	loose	MELA_0255	MELA
MELA_0256	MELA	24	loose	MELA_0256	MELA
MELA_0257	MELA	5	loose	MELA_0257	MELA
MELA_0261	MELA	9	loose	MELA_0261	MELA
MELA_0262	MELA	4	loose	MELA_0262	MELA
P01-28	PRAD	41	loose	P01-28	PRAD
P03-1426	PRAD	18	loose	P03-1426	PRAD
P05-3852	PRAD	14	loose	P05-3852	PRAD
P07-5021	PRAD	8	loose	P07-5021	PRAD
P07-837	PRAD	31	loose	P07-837	PRAD
P08-1042	PRAD	4	loose	P08-1042	PRAD
P08-1541	PRAD	17	loose	P08-1541	PRAD
P08-217	PRAD	1	loose	P08-217	PRAD
P08-501	PRAD	21	loose	P08-501	PRAD
P08-5852	PRAD	3	loose	P08-5852	PRAD
P08-716	PRAD	11	loose	P08-716	PRAD
P09-396	PRAD	2	loose	P09-396	PRAD
P09-628	PRAD	8	loose	P09-628	PRAD
P09-730	PRAD	5	loose	P09-730	PRAD
PM1002-Z1-1	PRAD	252	loose	PM1002-Z1-1	PRAD
PM1177-Z1-1	PRAD	19	loose	PM1177-Z1-1	PRAD
PM12-Z10-1	PRAD	10	loose	PM12-Z10-1	PRAD
PM1230-Z1	COAD	12	loose	PM1230-Z1	COAD
PM1301-Z1	GBM	94	loose	PM1301-Z1	GBM
PM1341-Z2	PACA	25	loose	PM1341-Z2	PACA
PM1388-Brain	PRAD	127	loose	PM1388-Brain	PRAD
PM1411-X1-1	PRAD	13	loose	PM1411-X1-1	PRAD
PM1462-Z1	PACA	12	loose	PM1462-Z1	PACA
PM1570-Z1-1	PRAD	11	loose	PM1570-Z1-1	PRAD
PM159-Z1-1	PRAD	34	loose	PM159-Z1-1	PRAD
PM159-Z6-1	PRAD	20	loose	PM159-Z6-1	PRAD
PM159-Z7-1	PRAD	23	loose	PM159-Z7-1	PRAD
PM316-Z17	KIRC	13	loose	PM316-Z17	KIRC
PM322-Z5-1	PRAD	35	loose	PM322-Z5-1	PRAD
PM63-Z3-1	PRAD	74	loose	PM63-Z3-1	PRAD
PM63-Z6-1	PRAD	75	loose	PM63-Z6-1	PRAD
PM631-Z1	STAD	12	loose	PM631-Z1	STAD
PM650-Z1	PRAD	2	loose	PM650-Z1	PRAD
PM677-Z12-1	PRAD	22	loose	PM677-Z12-1	PRAD
PM677-Z16-1	PRAD	26	loose	PM677-Z16-1	PRAD
PM677-Z7-1	PRAD	27	loose	PM677-Z7-1	PRAD
PM677-Z9-1	PRAD	24	loose	PM677-Z9-1	PRAD
PM692-Z3-1	GBM	8	loose	PM692-Z3-1	GBM
PM748-Z26-1	BLCA	2	loose	PM748-Z26-1	BLCA
PM773-X1	PACA	26	loose	PM773-X1	PACA
PM846-Z2-1	GBM	4	loose	PM846-Z2-1	GBM
PM861-Z5-1	PRAD	548	loose	PM861-Z5-1	PRAD
PM877-Z2-1	GBM	49	loose	PM877-Z2-1	GBM
PM883-Z2-1	GBM	7	loose	PM883-Z2-1	GBM
PM884-Z13-1	GBM	25	loose	PM884-Z13-1	GBM
PM90-Z1-1	PRAD	47	loose	PM90-Z1-1	PRAD
PM90-Z19-1	PRAD	2	loose	PM90-Z19-1	PRAD
PM919-Z2-1	LGG	12	loose	PM919-Z2-1	LGG
PM922-Z2	KIRP	112	loose	PM922-Z2	KIRP
PM935-Z1-1	GBM	20	loose	PM935-Z1-1	GBM
PM948-Z4-1	LGG	33	loose	PM948-Z4-1	LGG
PM992-X1-1	PRAD	27	loose	PM992-X1-1	PRAD
PR-03-3125	PRAD	11	loose	PR-03-3125	PRAD
PR-03-728	PRAD	0	loose	PR-03-728	PRAD
PR-04-1243	PRAD	26	loose	PR-04-1243	PRAD
PR-0410	PRAD	2	loose	PR-0410	PRAD
PR-05-3595	PRAD	13	loose	PR-05-3595	PRAD
PR-06-1749	PRAD	40	loose	PR-06-1749	PRAD
PR-07-3258	PRAD	70	loose	PR-07-3258	PRAD
PR-07-4610	PRAD	6	loose	PR-07-4610	PRAD
PR-08-2153	PRAD	2	loose	PR-08-2153	PRAD
PR-08-4154	PRAD	8	loose	PR-08-4154	PRAD
PR-08-784	PRAD	10	loose	PR-08-784	PRAD
PR-09-146	PRAD	5	loose	PR-09-146	PRAD
PR-2741	PRAD	17	loose	PR-2741	PRAD
PR-3042	PRAD	60	loose	PR-3042	PRAD
PR-4240	PRAD	82	loose	PR-4240	PRAD
PR-7520	PRAD	32	loose	PR-7520	PRAD
PR-STID0000000415	PRAD	9	loose	PR-STID0000000415	PRAD
PR-STID0000002872	PRAD	0	loose	PR-STID0000002872	PRAD
a293752317dee4bd4904cb5d2a081581e8472f6445709fb2c0f45ee85217990d	ESAD	63	loose	a293752317dee4bd4904cb5d2a081581e8472f6445709fb2c0f45ee85217990d	ESAD
a46434e58a34e0e99f630629c94f09d33e002444d02c39269165de26d985718d	ESAD	54	loose	a46434e58a34e0e99f630629c94f09d33e002444d02c39269165de26d985718d	ESAD
a575fa3a084b236bdcc6c02c119e643d4bdd9cb84bcac4716fca07bc2b74fcf1	ESAD	43	loose	a575fa3a084b236bdcc6c02c119e643d4bdd9cb84bcac4716fca07bc2b74fcf1	ESAD
a5cf51cebbb267ad48366801701eb3a8ec788f9ecff83b6635df09eff4c4a13d	ESAD	56	loose	a5cf51cebbb267ad48366801701eb3a8ec788f9ecff83b6635df09eff4c4a13d	ESAD
a624a0c1c1913bae5bbae8811ee75a6c5150308de7321ab7ac13247677335bfa	ESAD	52	loose	a624a0c1c1913bae5bbae8811ee75a6c5150308de7321ab7ac13247677335bfa	ESAD
a6d223164cca3826d327c57ac731da9f25584747d5f07781052aff2443d4ab2e	ESAD	84	loose	a6d223164cca3826d327c57ac731da9f25584747d5f07781052aff2443d4ab2e	ESAD
a8abb113e589e360a9aaa31db4883f56206e49bc70b6d3577eb4736ba40018d7	ESAD	31	loose	a8abb113e589e360a9aaa31db4883f56206e49bc70b6d3577eb4736ba40018d7	ESAD
a968458c4aa5fb6e51d777b44f5fd8f0c563732d2c2a7ec5dc93cd5f8695407a	ESAD	27	loose	a968458c4aa5fb6e51d777b44f5fd8f0c563732d2c2a7ec5dc93cd5f8695407a	ESAD
aa65a09b407bbeb0954d4632fd062dd8487c6fd8cdcfbc6ee25213fbe40f184c	ESAD	60	loose	aa65a09b407bbeb0954d4632fd062dd8487c6fd8cdcfbc6ee25213fbe40f184c	ESAD
ababdefc84d79651cc5cbee04223ebff2d3479f79542ab018ed7dd62c21fbb06	ESAD	41	loose	ababdefc84d79651cc5cbee04223ebff2d3479f79542ab018ed7dd62c21fbb06	ESAD
ad911862aca0a6b42d094875b3135f5a8e850ce1a11394dca9913cda419fe972	ESAD	45	loose	ad911862aca0a6b42d094875b3135f5a8e850ce1a11394dca9913cda419fe972	ESAD
af2e66fc3118bd5100b0d503caedda230b2b515a097537f873cd0190a115d44f	ESAD	68	loose	af2e66fc3118bd5100b0d503caedda230b2b515a097537f873cd0190a115d44f	ESAD
b095be882857633de948faf0619072298aa64461fd058af02352f8961c273320	ESAD	69	loose	b095be882857633de948faf0619072298aa64461fd058af02352f8961c273320	ESAD
b1e3464f5718a6c674ee1a8da4a92ab7cc4f892e1b2e7a25cc7401f5c734124e	ESAD	27	loose	b1e3464f5718a6c674ee1a8da4a92ab7cc4f892e1b2e7a25cc7401f5c734124e	ESAD
b83276e275db581581238ffb61e2680ef11a9bb54ad19bc8f70fbee175d10b5d	ESAD	58	loose	b83276e275db581581238ffb61e2680ef11a9bb54ad19bc8f70fbee175d10b5d	ESAD
b8b7637a8d22837847d02df6a4587bd93fcd2c9ed21ef04893336f3c7dd6ddba	ESAD	139	loose	b8b7637a8d22837847d02df6a4587bd93fcd2c9ed21ef04893336f3c7dd6ddba	ESAD
b8bfd29057a30c787f3ce32ad6fd64aeb349043a52c25d917cb28644bc0a48a0	ESAD	26	loose	b8bfd29057a30c787f3ce32ad6fd64aeb349043a52c25d917cb28644bc0a48a0	ESAD
bb12d9bb26703270e2fcfbff31177ae565874daf2528647fedd249b6c2935cf2	ESAD	38	loose	bb12d9bb26703270e2fcfbff31177ae565874daf2528647fedd249b6c2935cf2	ESAD
bd8b41d77f905bd068f01e8ac5dc0b7ef04d8ac2215d4154c0738348b8918278	ESAD	87	loose	bd8b41d77f905bd068f01e8ac5dc0b7ef04d8ac2215d4154c0738348b8918278	ESAD
be676cca94bc8602cb0eef47fafa62ae3665d31d7eae696604c0b2d1c11a4cbd	ESAD	14	loose	be676cca94bc8602cb0eef47fafa62ae3665d31d7eae696604c0b2d1c11a4cbd	ESAD
be968792772699a12e22c87670fa3f80e7c142271bdd98b62f4fb62f8fd4595c	ESAD	98	loose	be968792772699a12e22c87670fa3f80e7c142271bdd98b62f4fb62f8fd4595c	ESAD
c4576ef6950092fd647b7e0ccdf5e46cbfa3da5648f93f5e8c40f76bbf59fad3	ESAD	48	loose	c4576ef6950092fd647b7e0ccdf5e46cbfa3da5648f93f5e8c40f76bbf59fad3	ESAD
c4577b94393c6a47c5033065ba9a879329432ceb9cb8b6ee590c9023e0c9efb5	ESAD	42	loose	c4577b94393c6a47c5033065ba9a879329432ceb9cb8b6ee590c9023e0c9efb5	ESAD
c6872050642efc50838c33494a3f26c7a912efcda4b2d355306aab91b8a77db4	ESAD	49	loose	c6872050642efc50838c33494a3f26c7a912efcda4b2d355306aab91b8a77db4	ESAD
c72589bc8e2b3e3e7373fbf0b5adb4c67dfb65afa28950d68bc08e94b4e5f6e6	ESAD	20	loose	c72589bc8e2b3e3e7373fbf0b5adb4c67dfb65afa28950d68bc08e94b4e5f6e6	ESAD
c8520defc94e82f4984f47e47d452a9d06d0643704636037feb2782a757df487	ESAD	39	loose	c8520defc94e82f4984f47e47d452a9d06d0643704636037feb2782a757df487	ESAD
c92b6c3dc5d7ab373cca89e4261a451f1a5d86b4d5bc05d7136fabb995f4d353	ESAD	0	loose	c92b6c3dc5d7ab373cca89e4261a451f1a5d86b4d5bc05d7136fabb995f4d353	ESAD
ca5d2c19174791eda451f1994223b4c5b78a668e5b135230f5149eb7d65a97d3	ESAD	30	loose	ca5d2c19174791eda451f1994223b4c5b78a668e5b135230f5149eb7d65a97d3	ESAD
ca7711a3704bf6c3c53c8da9151d70fb1b412e52dab8a03e3380611d9669e750	ESAD	43	loose	ca7711a3704bf6c3c53c8da9151d70fb1b412e52dab8a03e3380611d9669e750	ESAD
cb69d1fba616ddc3cedf635f4a60d4e5a10e7206e091253e753900a02eac908e	ESAD	33	loose	cb69d1fba616ddc3cedf635f4a60d4e5a10e7206e091253e753900a02eac908e	ESAD
cdbcf2fc8ac3cd58a70dadea86a7d583d51754be9a38177c868368d3b1481976	ESAD	25	loose	cdbcf2fc8ac3cd58a70dadea86a7d583d51754be9a38177c868368d3b1481976	ESAD
d06edce9bcfc01daaf65ac43244b76ff54a7a6b548ae7dc38c4bfcc0c04dcdcd	ESAD	36	loose	d06edce9bcfc01daaf65ac43244b76ff54a7a6b548ae7dc38c4bfcc0c04dcdcd	ESAD
d0f07dbe50b17d281d72e7f09b962f4e75e676ff37d2497a1f6c721b17148d66	ESAD	19	loose	d0f07dbe50b17d281d72e7f09b962f4e75e676ff37d2497a1f6c721b17148d66	ESAD
d1d692f974e6dbbf5cc7610bed5e488d3d142979c7f3b01e199b273d70bd7fb8	ESAD	39	loose	d1d692f974e6dbbf5cc7610bed5e488d3d142979c7f3b01e199b273d70bd7fb8	ESAD
d20a89efc7cea30166cb218ed5c1648db76ed824426a7b58ba50cbbe39191475	ESAD	3	loose	d20a89efc7cea30166cb218ed5c1648db76ed824426a7b58ba50cbbe39191475	ESAD
d2588a7edd6efd35550bc49ebb03aae4445eec879c3a29a0c15e5a73654f2d04	ESAD	73	loose	d2588a7edd6efd35550bc49ebb03aae4445eec879c3a29a0c15e5a73654f2d04	ESAD
d2588a7edd6efd35550bc49ebb03aae4445eec879c3a29a0c15e5a73654f2d04.2	ESAD	83	loose	d2588a7edd6efd35550bc49ebb03aae4445eec879c3a29a0c15e5a73654f2d04.2	ESAD
d2736f3a3d17df5d3dd2fcb76ecd3043e35464dd05b5b86e3722d86578c68eef	ESAD	41	loose	d2736f3a3d17df5d3dd2fcb76ecd3043e35464dd05b5b86e3722d86578c68eef	ESAD
d2f9a56f010f5bc0e3d65890a416e91d6ce69b2bcb1c0f76de9345dd835fe6bb	ESAD	57	loose	d2f9a56f010f5bc0e3d65890a416e91d6ce69b2bcb1c0f76de9345dd835fe6bb	ESAD
d4c95d7413e88f9739a2fb25dfdddb938f57520c6d76a454a6c3d037ea9ff977	ESAD	34	loose	d4c95d7413e88f9739a2fb25dfdddb938f57520c6d76a454a6c3d037ea9ff977	ESAD
d91afc2f2ce5e663c474bccf20ea8abd1fdcf1a1d735d8422712b36ea154040e	ESAD	111	loose	d91afc2f2ce5e663c474bccf20ea8abd1fdcf1a1d735d8422712b36ea154040e	ESAD
d9ae1705ce0b4462ff82a46be3d5304819ffddc3715bbb6afd6e6181b8519846	ESAD	40	loose	d9ae1705ce0b4462ff82a46be3d5304819ffddc3715bbb6afd6e6181b8519846	ESAD
d9b28bce2ac1e8c6a6ea51c8363ea95bf522dea7876935acb451648cfe407994	ESAD	56	loose	d9b28bce2ac1e8c6a6ea51c8363ea95bf522dea7876935acb451648cfe407994	ESAD
ddbe3673feb6caaa40694506650420d1feeb0bd3de13ee81576efb6322e79ee1	ESAD	23	loose	ddbe3673feb6caaa40694506650420d1feeb0bd3de13ee81576efb6322e79ee1	ESAD
e1b2d7684cd7ed797f54d3996d6e5ddde59728fc88304ef2ca66b0b8593dd4ff	ESAD	14	loose	e1b2d7684cd7ed797f54d3996d6e5ddde59728fc88304ef2ca66b0b8593dd4ff	ESAD
e26373e3064c37d6a8bc3cd736998e37a396e3f84e46ee0fb03d1d5d99a76c53	ESAD	43	loose	e26373e3064c37d6a8bc3cd736998e37a396e3f84e46ee0fb03d1d5d99a76c53	ESAD
e308def3a33079a84267fe54fe2e611bcf37616a0b05c1a6586db411f5fa1086	ESAD	49	loose	e308def3a33079a84267fe54fe2e611bcf37616a0b05c1a6586db411f5fa1086	ESAD
e3271ccee7d736f7a876d8582ce224239ba68d7558af1f46de04e7024b9511c3	ESAD	25	loose	e3271ccee7d736f7a876d8582ce224239ba68d7558af1f46de04e7024b9511c3	ESAD
[truncated: 25 more rows]

## Sheet: 1E
loose.or.junction	balanced	N	label	frac	col
loose	unbalanced	39605	loose unbalanced	0.122155	pink
loose	balanced	4518	loose balanced	0.013935	red
junction	unbalanced	234901	junction unbalanced	0.724513	cornflowerblue
junction	balanced	45195	junction balanced	0.139397	navy
