# Supplementary material for: Most large structural variants in cancer genomes can be detected without long reads
Source: Nat Genet. 2023 Nov 9;55(12):2139–48. doi: 10.1038/s41588-023-01540-6 (PMC10703688; doi:10.1038/s41588-023-01540-6)
Supplement: Supplementary file 5 — Statistical source data for Fig. 3. [file 41588_2023_1540_MOESM5_ESM.xlsx]

## Sheet: 3A
forward	somatic	tumor	bin	n	norm.factor	norm.n	x
forward	somatic	tumor	-225	307	10.3896	29.5487	0.225
forward	somatic	tumor	-375	351	10.3896	33.7837	0.375
reverse	somatic	tumor	-2225	7	3.58333	1.95349	2.225
forward	somatic	normal	725	1	1	1	-0.725
reverse	somatic	tumor	-825	1	3.58333	0.27907	0.825
forward	somatic	tumor	1175	37	10.3896	3.56125	-1.175
forward	somatic	normal	3025	2	1	2	-3.025
forward	somatic	tumor	1275	34	10.3896	3.2725	-1.275
forward	somatic	tumor	875	74	10.3896	7.1225	-0.875
forward	somatic	tumor	925	46	10.3896	4.4275	-0.925
forward	somatic	tumor	775	128	10.3896	12.32	-0.775
forward	somatic	tumor	675	179	10.3896	17.2288	-0.675
forward	somatic	tumor	525	233	10.3896	22.4262	-0.525
forward	somatic	tumor	575	218	10.3896	20.9825	-0.575
forward	somatic	tumor	625	204	10.3896	19.635	-0.625
forward	somatic	tumor	725	131	10.3896	12.6088	-0.725
forward	somatic	tumor	75	988	10.3896	95.095	-0.075
forward	somatic	tumor	125	790	10.3896	76.0375	-0.125
forward	somatic	tumor	175	677	10.3896	65.1612	-0.175
forward	somatic	tumor	225	500	10.3896	48.125	-0.225
forward	somatic	tumor	375	318	10.3896	30.6075	-0.375
forward	somatic	tumor	425	268	10.3896	25.795	-0.425
forward	somatic	tumor	475	290	10.3896	27.9125	-0.475
forward	somatic	tumor	-1975	9	10.3896	0.86625	1.975
forward	somatic	tumor	-1925	3	10.3896	0.28875	1.925
forward	somatic	tumor	-1825	29	10.3896	2.79125	1.825
forward	somatic	tumor	-1775	23	10.3896	2.21375	1.775
forward	somatic	tumor	-1725	25	10.3896	2.40625	1.725
forward	somatic	tumor	-1675	20	10.3896	1.925	1.675
forward	somatic	tumor	-1575	16	10.3896	1.54	1.575
reverse	somatic	tumor	1725	2	3.58333	0.55814	-1.725
forward	somatic	tumor	-875	40	10.3896	3.85	0.875
forward	somatic	tumor	-675	82	10.3896	7.8925	0.675
reverse	somatic	normal	2925	1	1.07143	0.933333	-2.925
forward	somatic	tumor	25	1287	10.3896	123.874	-0.025
forward	somatic	tumor	-325	254	10.3896	24.4475	0.325
forward	somatic	tumor	-575	139	10.3896	13.3788	0.575
forward	somatic	tumor	3275	1	10.3896	0.09625	-3.275
forward	somatic	tumor	-275	289	10.3896	27.8163	0.275
forward	somatic	tumor	-175	381	10.3896	36.6713	0.175
forward	somatic	tumor	-125	399	10.3896	38.4038	0.125
forward	somatic	tumor	-75	425	10.3896	40.9062	0.075
forward	somatic	tumor	-25	520	10.3896	50.05	0.025
forward	somatic	tumor	-3525	7	10.3896	0.67375	3.525
forward	somatic	normal	-3525	1	1	1	3.525
forward	somatic	normal	-2775	1	1	1	2.775
forward	somatic	tumor	1725	13	10.3896	1.25125	-1.725
forward	somatic	tumor	325	321	10.3896	30.8962	-0.325
forward	somatic	tumor	275	415	10.3896	39.9438	-0.275
reverse	somatic	tumor	475	2	3.58333	0.55814	-0.475
reverse	somatic	tumor	3575	1	3.58333	0.27907	-3.575
forward	somatic	tumor	825	80	10.3896	7.7	-0.825
reverse	somatic	tumor	125	10	3.58333	2.7907	-0.125
reverse	somatic	tumor	175	11	3.58333	3.06977	-0.175
reverse	somatic	tumor	225	5	3.58333	1.39535	-0.225
reverse	somatic	normal	225	1	1.07143	0.933333	-0.225
reverse	somatic	tumor	4925	3	3.58333	0.837209	-4.925
forward	somatic	tumor	-425	283	10.3896	27.2387	0.425
forward	somatic	tumor	-475	327	10.3896	31.4737	0.475
reverse	somatic	normal	4925	1	1.07143	0.933333	-4.925
reverse	somatic	normal	1725	2	1.07143	1.86667	-1.725
reverse	somatic	tumor	1775	2	3.58333	0.55814	-1.775
reverse	somatic	tumor	1825	2	3.58333	0.55814	-1.825
reverse	somatic	tumor	1875	5	3.58333	1.39535	-1.875
reverse	somatic	normal	2025	2	1.07143	1.86667	-2.025
reverse	somatic	tumor	2025	4	3.58333	1.11628	-2.025
forward	somatic	tumor	2225	9	10.3896	0.86625	-2.225
forward	somatic	normal	2225	1	1	1	-2.225
forward	somatic	tumor	2275	8	10.3896	0.77	-2.275
forward	somatic	tumor	2375	18	10.3896	1.7325	-2.375
forward	somatic	normal	2375	3	1	3	-2.375
forward	somatic	normal	2425	8	1	8	-2.425
forward	somatic	tumor	2425	31	10.3896	2.98375	-2.425
forward	somatic	normal	-375	3	1	3	0.375
forward	somatic	normal	-275	7	1	7	0.275
forward	somatic	normal	-225	6	1	6	0.225
forward	somatic	normal	-175	3	1	3	0.175
reverse	somatic	normal	-175	1	1.07143	0.933333	0.175
reverse	somatic	tumor	-125	13	3.58333	3.62791	0.125
forward	somatic	normal	425	1	1	1	-0.425
forward	somatic	normal	1875	1	1	1	-1.875
forward	somatic	tumor	4375	3	10.3896	0.28875	-4.375
forward	somatic	tumor	1225	35	10.3896	3.36875	-1.225
reverse	somatic	tumor	-525	3	3.58333	0.837209	0.525
forward	somatic	tumor	-775	33	10.3896	3.17625	0.775
forward	somatic	tumor	975	42	10.3896	4.0425	-0.975
forward	somatic	tumor	1075	28	10.3896	2.695	-1.075
forward	somatic	tumor	1125	26	10.3896	2.5025	-1.125
reverse	somatic	tumor	-2325	6	3.58333	1.67442	2.325
reverse	somatic	tumor	-2275	9	3.58333	2.51163	2.275
reverse	somatic	tumor	4575	1	3.58333	0.27907	-4.575
reverse	somatic	normal	-3925	1	1.07143	0.933333	3.925
forward	somatic	normal	2875	1	1	1	-2.875
forward	somatic	tumor	-525	303	10.3896	29.1638	0.525
forward	somatic	tumor	-625	103	10.3896	9.91375	0.625
forward	somatic	tumor	-925	16	10.3896	1.54	0.925
forward	somatic	tumor	-725	36	10.3896	3.465	0.725
reverse	somatic	tumor	4025	1	3.58333	0.27907	-4.025
reverse	somatic	normal	-2625	1	1.07143	0.933333	2.625
reverse	somatic	normal	-2175	1	1.07143	0.933333	2.175
forward	somatic	tumor	-1375	36	10.3896	3.465	1.375
forward	somatic	tumor	-1175	34	10.3896	3.2725	1.175
forward	somatic	tumor	-1075	28	10.3896	2.695	1.075
reverse	somatic	tumor	-4525	5	3.58333	1.39535	4.525
reverse	somatic	tumor	-4475	6	3.58333	1.67442	4.475
reverse	somatic	tumor	-4425	9	3.58333	2.51163	4.425
reverse	somatic	tumor	-4375	9	3.58333	2.51163	4.375
reverse	somatic	tumor	-4325	4	3.58333	1.11628	4.325
forward	somatic	tumor	-3775	9	10.3896	0.86625	3.775
forward	somatic	tumor	-3825	12	10.3896	1.155	3.825
forward	somatic	tumor	-3875	22	10.3896	2.1175	3.875
forward	somatic	tumor	-3925	14	10.3896	1.3475	3.925
forward	somatic	tumor	-4175	11	10.3896	1.05875	4.175
forward	somatic	tumor	-4125	5	10.3896	0.48125	4.125
forward	somatic	tumor	-4075	7	10.3896	0.67375	4.075
forward	somatic	tumor	-4025	5	10.3896	0.48125	4.025
forward	somatic	tumor	-3975	12	10.3896	1.155	3.975
forward	somatic	tumor	-1525	14	10.3896	1.3475	1.525
forward	somatic	tumor	-1475	20	10.3896	1.925	1.475
forward	somatic	tumor	-1425	39	10.3896	3.75375	1.425
forward	somatic	tumor	-1325	22	10.3896	2.1175	1.325
forward	somatic	tumor	2675	11	10.3896	1.05875	-2.675
forward	somatic	tumor	2725	4	10.3896	0.385	-2.725
forward	somatic	tumor	2875	9	10.3896	0.86625	-2.875
forward	somatic	tumor	2925	8	10.3896	0.77	-2.925
forward	somatic	tumor	1025	34	10.3896	3.2725	-1.025
forward	somatic	tumor	-1275	31	10.3896	2.98375	1.275
reverse	somatic	tumor	1975	1	3.58333	0.27907	-1.975
reverse	somatic	tumor	-1675	1	3.58333	0.27907	1.675
reverse	somatic	tumor	-1475	1	3.58333	0.27907	1.475
reverse	somatic	tumor	-1425	1	3.58333	0.27907	1.425
reverse	somatic	tumor	-1375	3	3.58333	0.837209	1.375
reverse	somatic	tumor	-1325	5	3.58333	1.39535	1.325
reverse	somatic	tumor	-1275	6	3.58333	1.67442	1.275
reverse	somatic	tumor	-1175	2	3.58333	0.55814	1.175
forward	somatic	tumor	-2125	4	10.3896	0.385	2.125
forward	somatic	tumor	-2175	6	10.3896	0.5775	2.175
forward	somatic	tumor	-2225	7	10.3896	0.67375	2.225
forward	somatic	tumor	-2275	10	10.3896	0.9625	2.275
forward	somatic	tumor	-2325	3	10.3896	0.28875	2.325
reverse	somatic	normal	-1625	1	1.07143	0.933333	1.625
forward	somatic	normal	3425	1	1	1	-3.425
reverse	somatic	tumor	-925	1	3.58333	0.27907	0.925
forward	somatic	tumor	-1125	31	10.3896	2.98375	1.125
forward	somatic	tumor	-1025	22	10.3896	2.1175	1.025
forward	somatic	tumor	-975	27	10.3896	2.59875	0.975
forward	somatic	tumor	-825	29	10.3896	2.79125	0.825
reverse	somatic	tumor	-2575	3	3.58333	0.837209	2.575
reverse	somatic	tumor	-175	8	3.58333	2.23256	0.175
forward	somatic	normal	-125	3	1	3	0.125
forward	somatic	tumor	1675	23	10.3896	2.21375	-1.675
forward	somatic	tumor	1575	16	10.3896	1.54	-1.575
forward	somatic	tumor	1525	17	10.3896	1.63625	-1.525
forward	somatic	tumor	1475	27	10.3896	2.59875	-1.475
reverse	somatic	normal	-2025	1	1.07143	0.933333	2.025
forward	somatic	normal	4425	1	1	1	-4.425
reverse	somatic	tumor	275	3	3.58333	0.837209	-0.275
forward	somatic	normal	-675	1	1	1	0.675
forward	somatic	tumor	4675	2	10.3896	0.1925	-4.675
forward	somatic	tumor	4625	4	10.3896	0.385	-4.625
forward	somatic	tumor	4575	2	10.3896	0.1925	-4.575
forward	somatic	tumor	4525	6	10.3896	0.5775	-4.525
forward	somatic	tumor	4475	4	10.3896	0.385	-4.475
forward	somatic	tumor	4425	4	10.3896	0.385	-4.425
forward	somatic	tumor	4325	2	10.3896	0.1925	-4.325
forward	somatic	tumor	2575	6	10.3896	0.5775	-2.575
forward	somatic	tumor	1875	15	10.3896	1.44375	-1.875
forward	somatic	tumor	1375	36	10.3896	3.465	-1.375
forward	somatic	tumor	-4525	8	10.3896	0.77	4.525
forward	somatic	tumor	-4625	5	10.3896	0.48125	4.625
forward	somatic	tumor	-4725	4	10.3896	0.385	4.725
forward	somatic	tumor	-4775	11	10.3896	1.05875	4.775
forward	somatic	tumor	-4825	14	10.3896	1.3475	4.825
reverse	somatic	tumor	725	1	3.58333	0.27907	-0.725
reverse	somatic	tumor	-2775	1	3.58333	0.27907	2.775
forward	somatic	tumor	1325	27	10.3896	2.59875	-1.325
forward	somatic	tumor	1425	17	10.3896	1.63625	-1.425
forward	somatic	tumor	3625	7	10.3896	0.67375	-3.625
forward	somatic	tumor	3575	8	10.3896	0.77	-3.575
forward	somatic	tumor	3525	9	10.3896	0.86625	-3.525
forward	somatic	tumor	-3725	8	10.3896	0.77	3.725
reverse	somatic	tumor	4075	1	3.58333	0.27907	-4.075
forward	somatic	normal	-4975	1	1	1	4.975
forward	somatic	normal	-1675	1	1	1	1.675
forward	somatic	normal	-525	2	1	2	0.525
forward	somatic	normal	-1475	1	1	1	1.475
forward	somatic	tumor	-4875	11	10.3896	1.05875	4.875
reverse	somatic	tumor	75	4	3.58333	1.11628	-0.075
reverse	somatic	tumor	25	8	3.58333	2.23256	-0.025
forward	somatic	tumor	1825	13	10.3896	1.25125	-1.825
forward	somatic	tumor	1925	8	10.3896	0.77	-1.925
forward	somatic	tumor	4775	1	10.3896	0.09625	-4.775
reverse	somatic	tumor	-2675	3	3.58333	0.837209	2.675
reverse	somatic	tumor	-2625	4	3.58333	1.11628	2.625
reverse	somatic	tumor	-2425	5	3.58333	1.39535	2.425
reverse	somatic	tumor	-2375	5	3.58333	1.39535	2.375
reverse	somatic	tumor	-1875	1	3.58333	0.27907	1.875
forward	somatic	tumor	2825	4	10.3896	0.385	-2.825
forward	somatic	tumor	2975	4	10.3896	0.385	-2.975
forward	somatic	tumor	3025	12	10.3896	1.155	-3.025
forward	somatic	tumor	3075	11	10.3896	1.05875	-3.075
forward	somatic	tumor	3125	3	10.3896	0.28875	-3.125
forward	somatic	tumor	-4675	3	10.3896	0.28875	4.675
reverse	somatic	tumor	2125	3	3.58333	0.837209	-2.125
reverse	somatic	tumor	-25	9	3.58333	2.51163	0.025
reverse	somatic	tumor	-75	4	3.58333	1.11628	0.075
reverse	somatic	tumor	-225	15	3.58333	4.18605	0.225
reverse	somatic	tumor	-375	3	3.58333	0.837209	0.375
forward	somatic	tumor	1625	10	10.3896	0.9625	-1.625
forward	somatic	tumor	1975	2	10.3896	0.1925	-1.975
reverse	somatic	tumor	925	6	3.58333	1.67442	-0.925
forward	somatic	tumor	-2375	2	10.3896	0.1925	2.375
forward	somatic	tumor	-2425	5	10.3896	0.48125	2.425
forward	somatic	tumor	-2525	4	10.3896	0.385	2.525
forward	somatic	tumor	-2575	8	10.3896	0.77	2.575
forward	somatic	tumor	3975	2	10.3896	0.1925	-3.975
forward	somatic	normal	1325	1	1	1	-1.325
forward	somatic	tumor	-4925	9	10.3896	0.86625	4.925
forward	somatic	tumor	-4975	7	10.3896	0.67375	4.975
forward	somatic	tumor	-2975	6	10.3896	0.5775	2.975
reverse	somatic	normal	-3025	2	1.07143	1.86667	3.025
reverse	somatic	normal	175	3	1.07143	2.8	-0.175
reverse	somatic	normal	-4125	1	1.07143	0.933333	4.125
forward	somatic	normal	2475	1	1	1	-2.475
forward	somatic	tumor	-4575	7	10.3896	0.67375	4.575
forward	somatic	tumor	-4475	7	10.3896	0.67375	4.475
forward	somatic	normal	4175	1	1	1	-4.175
reverse	somatic	tumor	2525	1	3.58333	0.27907	-2.525
reverse	somatic	tumor	2475	1	3.58333	0.27907	-2.475
reverse	somatic	tumor	2425	2	3.58333	0.55814	-2.425
reverse	somatic	tumor	2375	3	3.58333	0.837209	-2.375
reverse	somatic	tumor	2325	1	3.58333	0.27907	-2.325
forward	somatic	tumor	2175	6	10.3896	0.5775	-2.175
forward	somatic	tumor	2325	12	10.3896	1.155	-2.325
forward	somatic	tumor	2475	7	10.3896	0.67375	-2.475
forward	somatic	normal	-325	4	1	4	0.325
reverse	somatic	normal	-4675	1	1.07143	0.933333	4.675
forward	somatic	tumor	2075	2	10.3896	0.1925	-2.075
reverse	somatic	tumor	4475	3	3.58333	0.837209	-4.475
reverse	somatic	tumor	1625	1	3.58333	0.27907	-1.625
reverse	somatic	tumor	-4075	4	3.58333	1.11628	4.075
reverse	somatic	tumor	-4125	6	3.58333	1.67442	4.125
reverse	somatic	tumor	-4175	3	3.58333	0.837209	4.175
reverse	somatic	tumor	-4225	8	3.58333	2.23256	4.225
reverse	somatic	tumor	-4275	7	3.58333	1.95349	4.275
forward	somatic	tumor	-2875	3	10.3896	0.28875	2.875
forward	somatic	tumor	4875	1	10.3896	0.09625	-4.875
forward	somatic	tumor	1775	13	10.3896	1.25125	-1.775
forward	somatic	tumor	-4425	1	10.3896	0.09625	4.425
forward	somatic	tumor	-4375	1	10.3896	0.09625	4.375
forward	somatic	tumor	-4275	1	10.3896	0.09625	4.275
reverse	somatic	tumor	-4025	2	3.58333	0.55814	4.025
reverse	somatic	tumor	-3925	2	3.58333	0.55814	3.925
reverse	somatic	tumor	-475	2	3.58333	0.55814	0.475
reverse	somatic	tumor	-1025	1	3.58333	0.27907	1.025
reverse	somatic	tumor	-1075	1	3.58333	0.27907	1.075
forward	somatic	tumor	-1625	21	10.3896	2.02125	1.625
forward	somatic	tumor	-1875	12	10.3896	1.155	1.875
reverse	somatic	tumor	1425	3	3.58333	0.837209	-1.425
forward	somatic	tumor	-2825	5	10.3896	0.48125	2.825
forward	somatic	tumor	-1225	16	10.3896	1.54	1.225
reverse	somatic	tumor	3525	1	3.58333	0.27907	-3.525
forward	somatic	tumor	-4225	2	10.3896	0.1925	4.225
forward	somatic	tumor	-4325	1	10.3896	0.09625	4.325
forward	somatic	tumor	-2675	4	10.3896	0.385	2.675
forward	somatic	tumor	-2625	8	10.3896	0.77	2.625
forward	somatic	tumor	-2475	4	10.3896	0.385	2.475
reverse	somatic	normal	-2725	1	1.07143	0.933333	2.725
forward	somatic	normal	225	2	1	2	-0.225
forward	somatic	tumor	-3175	8	10.3896	0.77	3.175
forward	somatic	tumor	-3125	11	10.3896	1.05875	3.125
forward	somatic	tumor	-3075	8	10.3896	0.77	3.075
forward	somatic	tumor	-3025	8	10.3896	0.77	3.025
reverse	somatic	tumor	-2925	3	3.58333	0.837209	2.925
reverse	somatic	tumor	-2825	1	3.58333	0.27907	2.825
reverse	somatic	tumor	1475	2	3.58333	0.55814	-1.475
forward	somatic	normal	-2375	1	1	1	2.375
reverse	somatic	tumor	-625	3	3.58333	0.837209	0.625
forward	somatic	tumor	3325	1	10.3896	0.09625	-3.325
reverse	somatic	tumor	-4925	3	3.58333	0.837209	4.925
reverse	somatic	tumor	2225	1	3.58333	0.27907	-2.225
forward	somatic	tumor	-3675	3	10.3896	0.28875	3.675
reverse	somatic	tumor	-1625	1	3.58333	0.27907	1.625
reverse	somatic	tumor	525	1	3.58333	0.27907	-0.525
reverse	somatic	tumor	575	1	3.58333	0.27907	-0.575
reverse	somatic	tumor	625	2	3.58333	0.55814	-0.625
reverse	somatic	tumor	675	3	3.58333	0.837209	-0.675
reverse	somatic	tumor	775	4	3.58333	1.11628	-0.775
reverse	somatic	tumor	825	3	3.58333	0.837209	-0.825
reverse	somatic	tumor	4825	2	3.58333	0.55814	-4.825
reverse	somatic	tumor	4775	2	3.58333	0.55814	-4.775
reverse	somatic	tumor	4725	3	3.58333	0.837209	-4.725
reverse	somatic	tumor	4425	1	3.58333	0.27907	-4.425
forward	somatic	tumor	2525	6	10.3896	0.5775	-2.525
forward	somatic	tumor	-2775	2	10.3896	0.1925	2.775
reverse	somatic	normal	1525	1	1.07143	0.933333	-1.525
forward	somatic	tumor	-2725	6	10.3896	0.5775	2.725
reverse	somatic	tumor	1575	1	3.58333	0.27907	-1.575
reverse	somatic	tumor	1525	2	3.58333	0.55814	-1.525
forward	somatic	tumor	2025	2	10.3896	0.1925	-2.025
reverse	somatic	tumor	-675	1	3.58333	0.27907	0.675
forward	somatic	tumor	-2025	2	10.3896	0.1925	2.025
reverse	somatic	tumor	-275	11	3.58333	3.06977	0.275
reverse	somatic	tumor	-325	7	3.58333	1.95349	0.325
reverse	somatic	tumor	-425	3	3.58333	0.837209	0.425
reverse	somatic	tumor	-575	3	3.58333	0.837209	0.575
reverse	somatic	tumor	-725	1	3.58333	0.27907	0.725
reverse	somatic	tumor	-775	8	3.58333	2.23256	0.775
reverse	somatic	tumor	1025	2	3.58333	0.55814	-1.025
reverse	somatic	tumor	4675	1	3.58333	0.27907	-4.675
reverse	somatic	tumor	2625	1	3.58333	0.27907	-2.625
reverse	somatic	tumor	4375	2	3.58333	0.55814	-4.375
reverse	somatic	tumor	4525	1	3.58333	0.27907	-4.525
forward	somatic	tumor	3925	3	10.3896	0.28875	-3.925
forward	somatic	tumor	3875	5	10.3896	0.48125	-3.875
forward	somatic	tumor	3825	4	10.3896	0.385	-3.825
forward	somatic	tumor	3775	9	10.3896	0.86625	-3.775
forward	somatic	tumor	-2925	5	10.3896	0.48125	2.925
reverse	somatic	tumor	2175	2	3.58333	0.55814	-2.175
forward	somatic	normal	4625	1	1	1	-4.625
reverse	somatic	normal	-3325	1	1.07143	0.933333	3.325
reverse	somatic	normal	2725	1	1.07143	0.933333	-2.725
reverse	somatic	tumor	-2525	4	3.58333	1.11628	2.525
reverse	somatic	tumor	-4675	1	3.58333	0.27907	4.675
reverse	somatic	tumor	4125	1	3.58333	0.27907	-4.125
reverse	somatic	tumor	3775	1	3.58333	0.27907	-3.775
reverse	somatic	tumor	3075	5	3.58333	1.39535	-3.075
reverse	somatic	tumor	3025	5	3.58333	1.39535	-3.025
reverse	somatic	normal	-3575	1	1.07143	0.933333	3.575
reverse	somatic	normal	-225	2	1.07143	1.86667	0.225
forward	somatic	normal	25	3	1	3	-0.025
reverse	somatic	tumor	3175	4	3.58333	1.11628	-3.175
reverse	somatic	tumor	3125	3	3.58333	0.837209	-3.125
reverse	somatic	tumor	2975	4	3.58333	1.11628	-2.975
reverse	somatic	tumor	2875	1	3.58333	0.27907	-2.875
reverse	somatic	tumor	2825	2	3.58333	0.55814	-2.825
reverse	somatic	tumor	-3225	6	3.58333	1.67442	3.225
reverse	somatic	tumor	-3175	6	3.58333	1.67442	3.175
reverse	somatic	tumor	-3125	3	3.58333	0.837209	3.125
forward	somatic	tumor	3675	1	10.3896	0.09625	-3.675
forward	somatic	tumor	3725	1	10.3896	0.09625	-3.725
reverse	somatic	tumor	1275	1	3.58333	0.27907	-1.275
reverse	somatic	tumor	1225	2	3.58333	0.55814	-1.225
reverse	somatic	tumor	1125	1	3.58333	0.27907	-1.125
reverse	somatic	tumor	1075	1	3.58333	0.27907	-1.075
forward	somatic	tumor	-2075	1	10.3896	0.09625	2.075
reverse	somatic	tumor	425	3	3.58333	0.837209	-0.425
forward	somatic	normal	125	1	1	1	-0.125
forward	somatic	tumor	2625	11	10.3896	1.05875	-2.625
reverse	somatic	tumor	2575	1	3.58333	0.27907	-2.575
reverse	somatic	tumor	-3625	1	3.58333	0.27907	3.625
reverse	somatic	tumor	-3525	1	3.58333	0.27907	3.525
forward	somatic	normal	175	4	1	4	-0.175
forward	somatic	normal	-75	2	1	2	0.075
forward	somatic	normal	-2475	1	1	1	2.475
reverse	somatic	tumor	-2975	1	3.58333	0.27907	2.975
reverse	somatic	normal	-3075	1	1.07143	0.933333	3.075
reverse	somatic	normal	-1125	1	1.07143	0.933333	1.125
forward	somatic	normal	1425	2	1	2	-1.425
reverse	somatic	tumor	-2475	5	3.58333	1.39535	2.475
forward	somatic	normal	4375	1	1	1	-4.375
reverse	somatic	tumor	-1775	1	3.58333	0.27907	1.775
reverse	somatic	tumor	-1725	3	3.58333	0.837209	1.725
reverse	somatic	tumor	4875	2	3.58333	0.55814	-4.875
forward	somatic	tumor	3175	2	10.3896	0.1925	-3.175
forward	somatic	normal	-3675	1	1	1	3.675
forward	somatic	tumor	4075	3	10.3896	0.28875	-4.075
reverse	somatic	tumor	-1225	1	3.58333	0.27907	1.225
reverse	somatic	normal	2675	1	1.07143	0.933333	-2.675
reverse	somatic	normal	-975	1	1.07143	0.933333	0.975
reverse	somatic	normal	825	1	1.07143	0.933333	-0.825
forward	somatic	tumor	-3625	4	10.3896	0.385	3.625
forward	somatic	tumor	-3575	3	10.3896	0.28875	3.575
forward	somatic	tumor	-3475	3	10.3896	0.28875	3.475
forward	somatic	tumor	-3425	1	10.3896	0.09625	3.425
forward	somatic	tumor	-3325	1	10.3896	0.09625	3.325
reverse	somatic	normal	-4575	1	1.07143	0.933333	4.575
forward	somatic	tumor	4275	1	10.3896	0.09625	-4.275
reverse	somatic	tumor	4975	2	3.58333	0.55814	-4.975
forward	somatic	normal	3975	1	1	1	-3.975
forward	somatic	tumor	4225	1	10.3896	0.09625	-4.225
reverse	somatic	tumor	-3675	1	3.58333	0.27907	3.675
reverse	somatic	normal	525	1	1.07143	0.933333	-0.525

## Sheet: 3C
forward	tumor	bin	label	rep	n	norm.factor	norm.n	color.label
forward	tumor	-4975	CRTR	C	1	3.05	0.327869	CRTR forward
forward	tumor	-4975	CRTR	G	1	1.05	0.952381	CRTR forward
forward	tumor	-4975	GRTR	C	1	1	1	GRTR forward
forward	tumor	-4975	GRTR	G	4	12.05	0.33195	GRTR forward
forward	tumor	-4975	other	C	1	2.8	0.357143	other forward
forward	tumor	-4975	other	G	3	5	0.6	other forward
forward	tumor	-4925	CRTR	C	1	3.05	0.327869	CRTR forward
forward	tumor	-4925	CRTR	G	1	1.05	0.952381	CRTR forward
forward	tumor	-4925	GRTR	C	1	1	1	GRTR forward
forward	tumor	-4925	GRTR	G	5	12.05	0.414938	GRTR forward
forward	tumor	-4925	other	C	1	2.8	0.357143	other forward
forward	tumor	-4925	other	G	3	5	0.6	other forward
forward	tumor	-4875	CRTR	C	1	3.05	0.327869	CRTR forward
forward	tumor	-4875	CRTR	G	1	1.05	0.952381	CRTR forward
forward	tumor	-4875	GRTR	C	1	1	1	GRTR forward
forward	tumor	-4875	GRTR	G	11	12.05	0.912863	GRTR forward
forward	tumor	-4875	other	C	1	2.8	0.357143	other forward
forward	tumor	-4875	other	G	1	5	0.2	other forward
forward	tumor	-4825	CRTR	C	2	3.05	0.655738	CRTR forward
forward	tumor	-4825	CRTR	G	1	1.05	0.952381	CRTR forward
forward	tumor	-4825	GRTR	C	1	1	1	GRTR forward
forward	tumor	-4825	GRTR	G	11	12.05	0.912863	GRTR forward
forward	tumor	-4825	other	C	1	2.8	0.357143	other forward
forward	tumor	-4825	other	G	1	5	0.2	other forward
forward	tumor	-4775	CRTR	C	1	3.05	0.327869	CRTR forward
forward	tumor	-4775	CRTR	G	1	1.05	0.952381	CRTR forward
forward	tumor	-4775	GRTR	C	1	1	1	GRTR forward
forward	tumor	-4775	GRTR	G	8	12.05	0.6639	GRTR forward
forward	tumor	-4775	other	C	1	2.8	0.357143	other forward
forward	tumor	-4775	other	G	1	5	0.2	other forward
forward	tumor	-4725	CRTR	C	2	3.05	0.655738	CRTR forward
forward	tumor	-4725	CRTR	G	1	1.05	0.952381	CRTR forward
forward	tumor	-4725	GRTR	C	1	1	1	GRTR forward
forward	tumor	-4725	GRTR	G	2	12.05	0.165975	GRTR forward
forward	tumor	-4725	other	C	1	2.8	0.357143	other forward
forward	tumor	-4725	other	G	1	5	0.2	other forward
forward	tumor	-4675	CRTR	C	1	3.05	0.327869	CRTR forward
forward	tumor	-4675	CRTR	G	1	1.05	0.952381	CRTR forward
forward	tumor	-4675	GRTR	C	1	1	1	GRTR forward
forward	tumor	-4675	GRTR	G	1	12.05	0.0829876	GRTR forward
forward	tumor	-4675	other	C	1	2.8	0.357143	other forward
forward	tumor	-4675	other	G	2	5	0.4	other forward
forward	tumor	-4625	CRTR	C	1	3.05	0.327869	CRTR forward
forward	tumor	-4625	CRTR	G	1	1.05	0.952381	CRTR forward
forward	tumor	-4625	GRTR	C	1	1	1	GRTR forward
forward	tumor	-4625	GRTR	G	4	12.05	0.33195	GRTR forward
forward	tumor	-4625	other	C	1	2.8	0.357143	other forward
forward	tumor	-4625	other	G	1	5	0.2	other forward
forward	tumor	-4575	CRTR	C	1	3.05	0.327869	CRTR forward
forward	tumor	-4575	CRTR	G	1	1.05	0.952381	CRTR forward
forward	tumor	-4575	GRTR	C	1	1	1	GRTR forward
forward	tumor	-4575	GRTR	G	6	12.05	0.497925	GRTR forward
forward	tumor	-4575	other	C	1	2.8	0.357143	other forward
forward	tumor	-4575	other	G	1	5	0.2	other forward
forward	tumor	-4525	CRTR	C	1	3.05	0.327869	CRTR forward
forward	tumor	-4525	CRTR	G	1	1.05	0.952381	CRTR forward
forward	tumor	-4525	GRTR	C	1	1	1	GRTR forward
forward	tumor	-4525	GRTR	G	7	12.05	0.580913	GRTR forward
forward	tumor	-4525	other	C	1	2.8	0.357143	other forward
forward	tumor	-4525	other	G	1	5	0.2	other forward
forward	tumor	-4475	CRTR	C	1	3.05	0.327869	CRTR forward
forward	tumor	-4475	CRTR	G	1	1.05	0.952381	CRTR forward
forward	tumor	-4475	GRTR	C	1	1	1	GRTR forward
forward	tumor	-4475	GRTR	G	3	12.05	0.248963	GRTR forward
forward	tumor	-4475	other	C	1	2.8	0.357143	other forward
forward	tumor	-4475	other	G	4	5	0.8	other forward
forward	tumor	-4425	CRTR	C	1	3.05	0.327869	CRTR forward
forward	tumor	-4425	CRTR	G	1	1.05	0.952381	CRTR forward
forward	tumor	-4425	GRTR	C	1	1	1	GRTR forward
forward	tumor	-4425	GRTR	G	1	12.05	0.0829876	GRTR forward
forward	tumor	-4425	other	C	1	2.8	0.357143	other forward
forward	tumor	-4425	other	G	1	5	0.2	other forward
forward	tumor	-4375	CRTR	C	1	3.05	0.327869	CRTR forward
forward	tumor	-4375	CRTR	G	1	1.05	0.952381	CRTR forward
forward	tumor	-4375	GRTR	C	1	1	1	GRTR forward
forward	tumor	-4375	GRTR	G	1	12.05	0.0829876	GRTR forward
forward	tumor	-4375	other	C	1	2.8	0.357143	other forward
forward	tumor	-4375	other	G	1	5	0.2	other forward
forward	tumor	-4325	CRTR	C	1	3.05	0.327869	CRTR forward
forward	tumor	-4325	CRTR	G	1	1.05	0.952381	CRTR forward
forward	tumor	-4325	GRTR	C	1	1	1	GRTR forward
forward	tumor	-4325	GRTR	G	1	12.05	0.0829876	GRTR forward
forward	tumor	-4325	other	C	1	2.8	0.357143	other forward
forward	tumor	-4325	other	G	1	5	0.2	other forward
forward	tumor	-4275	CRTR	C	1	3.05	0.327869	CRTR forward
forward	tumor	-4275	CRTR	G	1	1.05	0.952381	CRTR forward
forward	tumor	-4275	GRTR	C	1	1	1	GRTR forward
forward	tumor	-4275	GRTR	G	1	12.05	0.0829876	GRTR forward
forward	tumor	-4275	other	C	1	2.8	0.357143	other forward
forward	tumor	-4275	other	G	1	5	0.2	other forward
forward	tumor	-4225	CRTR	C	1	3.05	0.327869	CRTR forward
forward	tumor	-4225	CRTR	G	1	1.05	0.952381	CRTR forward
forward	tumor	-4225	GRTR	C	1	1	1	GRTR forward
forward	tumor	-4225	GRTR	G	1	12.05	0.0829876	GRTR forward
forward	tumor	-4225	other	C	1	2.8	0.357143	other forward
forward	tumor	-4225	other	G	1	5	0.2	other forward
forward	tumor	-4175	CRTR	C	1	3.05	0.327869	CRTR forward
forward	tumor	-4175	CRTR	G	1	1.05	0.952381	CRTR forward
forward	tumor	-4175	GRTR	C	1	1	1	GRTR forward
forward	tumor	-4175	GRTR	G	10	12.05	0.829876	GRTR forward
forward	tumor	-4175	other	C	1	2.8	0.357143	other forward
forward	tumor	-4175	other	G	1	5	0.2	other forward
forward	tumor	-4125	CRTR	C	1	3.05	0.327869	CRTR forward
forward	tumor	-4125	CRTR	G	1	1.05	0.952381	CRTR forward
forward	tumor	-4125	GRTR	C	1	1	1	GRTR forward
forward	tumor	-4125	GRTR	G	4	12.05	0.33195	GRTR forward
forward	tumor	-4125	other	C	1	2.8	0.357143	other forward
forward	tumor	-4125	other	G	1	5	0.2	other forward
forward	tumor	-4075	CRTR	C	1	3.05	0.327869	CRTR forward
forward	tumor	-4075	CRTR	G	1	1.05	0.952381	CRTR forward
forward	tumor	-4075	GRTR	C	1	1	1	GRTR forward
forward	tumor	-4075	GRTR	G	6	12.05	0.497925	GRTR forward
forward	tumor	-4075	other	C	1	2.8	0.357143	other forward
forward	tumor	-4075	other	G	1	5	0.2	other forward
forward	tumor	-4025	CRTR	C	1	3.05	0.327869	CRTR forward
forward	tumor	-4025	CRTR	G	1	1.05	0.952381	CRTR forward
forward	tumor	-4025	GRTR	C	1	1	1	GRTR forward
forward	tumor	-4025	GRTR	G	3	12.05	0.248963	GRTR forward
forward	tumor	-4025	other	C	2	2.8	0.714286	other forward
forward	tumor	-4025	other	G	1	5	0.2	other forward
forward	tumor	-3975	CRTR	C	1	3.05	0.327869	CRTR forward
forward	tumor	-3975	CRTR	G	1	1.05	0.952381	CRTR forward
forward	tumor	-3975	GRTR	C	1	1	1	GRTR forward
forward	tumor	-3975	GRTR	G	10	12.05	0.829876	GRTR forward
forward	tumor	-3975	other	C	2	2.8	0.714286	other forward
forward	tumor	-3975	other	G	1	5	0.2	other forward
forward	tumor	-3925	CRTR	C	1	3.05	0.327869	CRTR forward
forward	tumor	-3925	CRTR	G	1	1.05	0.952381	CRTR forward
forward	tumor	-3925	GRTR	C	1	1	1	GRTR forward
forward	tumor	-3925	GRTR	G	4	12.05	0.33195	GRTR forward
forward	tumor	-3925	other	C	9	2.8	3.21429	other forward
forward	tumor	-3925	other	G	1	5	0.2	other forward
forward	tumor	-3875	CRTR	C	1	3.05	0.327869	CRTR forward
forward	tumor	-3875	CRTR	G	1	1.05	0.952381	CRTR forward
forward	tumor	-3875	GRTR	C	1	1	1	GRTR forward
forward	tumor	-3875	GRTR	G	6	12.05	0.497925	GRTR forward
forward	tumor	-3875	other	C	16	2.8	5.71429	other forward
forward	tumor	-3875	other	G	1	5	0.2	other forward
forward	tumor	-3825	CRTR	C	1	3.05	0.327869	CRTR forward
forward	tumor	-3825	CRTR	G	1	1.05	0.952381	CRTR forward
forward	tumor	-3825	GRTR	C	1	1	1	GRTR forward
forward	tumor	-3825	GRTR	G	1	12.05	0.0829876	GRTR forward
forward	tumor	-3825	other	C	12	2.8	4.28571	other forward
forward	tumor	-3825	other	G	1	5	0.2	other forward
forward	tumor	-3775	CRTR	C	1	3.05	0.327869	CRTR forward
forward	tumor	-3775	CRTR	G	1	1.05	0.952381	CRTR forward
forward	tumor	-3775	GRTR	C	1	1	1	GRTR forward
forward	tumor	-3775	GRTR	G	1	12.05	0.0829876	GRTR forward
forward	tumor	-3775	other	C	9	2.8	3.21429	other forward
forward	tumor	-3775	other	G	1	5	0.2	other forward
forward	tumor	-3725	CRTR	C	1	3.05	0.327869	CRTR forward
forward	tumor	-3725	CRTR	G	1	1.05	0.952381	CRTR forward
forward	tumor	-3725	GRTR	C	1	1	1	GRTR forward
forward	tumor	-3725	GRTR	G	3	12.05	0.248963	GRTR forward
forward	tumor	-3725	other	C	5	2.8	1.78571	other forward
forward	tumor	-3725	other	G	1	5	0.2	other forward
forward	tumor	-3675	CRTR	C	1	3.05	0.327869	CRTR forward
forward	tumor	-3675	CRTR	G	1	1.05	0.952381	CRTR forward
forward	tumor	-3675	GRTR	C	1	1	1	GRTR forward
forward	tumor	-3675	GRTR	G	1	12.05	0.0829876	GRTR forward
forward	tumor	-3675	other	C	2	2.8	0.714286	other forward
forward	tumor	-3675	other	G	1	5	0.2	other forward
forward	tumor	-3625	CRTR	C	1	3.05	0.327869	CRTR forward
forward	tumor	-3625	CRTR	G	1	1.05	0.952381	CRTR forward
forward	tumor	-3625	GRTR	C	1	1	1	GRTR forward
forward	tumor	-3625	GRTR	G	1	12.05	0.0829876	GRTR forward
forward	tumor	-3625	other	C	4	2.8	1.42857	other forward
forward	tumor	-3625	other	G	1	5	0.2	other forward
forward	tumor	-3575	CRTR	C	1	3.05	0.327869	CRTR forward
forward	tumor	-3575	CRTR	G	1	1.05	0.952381	CRTR forward
forward	tumor	-3575	GRTR	C	1	1	1	GRTR forward
forward	tumor	-3575	GRTR	G	1	12.05	0.0829876	GRTR forward
forward	tumor	-3575	other	C	3	2.8	1.07143	other forward
forward	tumor	-3575	other	G	1	5	0.2	other forward
forward	tumor	-3525	CRTR	C	1	3.05	0.327869	CRTR forward
forward	tumor	-3525	CRTR	G	1	1.05	0.952381	CRTR forward
forward	tumor	-3525	GRTR	C	1	1	1	GRTR forward
forward	tumor	-3525	GRTR	G	1	12.05	0.0829876	GRTR forward
forward	tumor	-3525	other	C	5	2.8	1.78571	other forward
forward	tumor	-3525	other	G	2	5	0.4	other forward
forward	tumor	-3475	CRTR	C	1	3.05	0.327869	CRTR forward
forward	tumor	-3475	CRTR	G	1	1.05	0.952381	CRTR forward
forward	tumor	-3475	GRTR	C	1	1	1	GRTR forward
forward	tumor	-3475	GRTR	G	1	12.05	0.0829876	GRTR forward
forward	tumor	-3475	other	C	3	2.8	1.07143	other forward
forward	tumor	-3475	other	G	1	5	0.2	other forward
forward	tumor	-3425	CRTR	C	1	3.05	0.327869	CRTR forward
forward	tumor	-3425	CRTR	G	1	1.05	0.952381	CRTR forward
forward	tumor	-3425	GRTR	C	1	1	1	GRTR forward
forward	tumor	-3425	GRTR	G	1	12.05	0.0829876	GRTR forward
forward	tumor	-3425	other	C	1	2.8	0.357143	other forward
forward	tumor	-3425	other	G	1	5	0.2	other forward
forward	tumor	-3325	CRTR	C	1	3.05	0.327869	CRTR forward
forward	tumor	-3325	CRTR	G	1	1.05	0.952381	CRTR forward
forward	tumor	-3325	GRTR	C	1	1	1	GRTR forward
forward	tumor	-3325	GRTR	G	1	12.05	0.0829876	GRTR forward
forward	tumor	-3325	other	C	1	2.8	0.357143	other forward
forward	tumor	-3325	other	G	1	5	0.2	other forward
forward	tumor	-3225	CRTR	C	1	3.05	0.327869	CRTR forward
forward	tumor	-3225	CRTR	G	1	1.05	0.952381	CRTR forward
forward	tumor	-3225	GRTR	C	1	1	1	GRTR forward
forward	tumor	-3225	GRTR	G	1	12.05	0.0829876	GRTR forward
forward	tumor	-3225	other	C	1	2.8	0.357143	other forward
forward	tumor	-3225	other	G	1	5	0.2	other forward
forward	tumor	-3175	CRTR	C	6	3.05	1.96721	CRTR forward
forward	tumor	-3175	CRTR	G	1	1.05	0.952381	CRTR forward
forward	tumor	-3175	GRTR	C	1	1	1	GRTR forward
forward	tumor	-3175	GRTR	G	1	12.05	0.0829876	GRTR forward
forward	tumor	-3175	other	C	1	2.8	0.357143	other forward
forward	tumor	-3175	other	G	2	5	0.4	other forward
forward	tumor	-3125	CRTR	C	10	3.05	3.27869	CRTR forward
forward	tumor	-3125	CRTR	G	1	1.05	0.952381	CRTR forward
forward	tumor	-3125	GRTR	C	1	1	1	GRTR forward
forward	tumor	-3125	GRTR	G	1	12.05	0.0829876	GRTR forward
forward	tumor	-3125	other	C	1	2.8	0.357143	other forward
forward	tumor	-3125	other	G	1	5	0.2	other forward
forward	tumor	-3075	CRTR	C	8	3.05	2.62295	CRTR forward
forward	tumor	-3075	CRTR	G	1	1.05	0.952381	CRTR forward
forward	tumor	-3075	GRTR	C	1	1	1	GRTR forward
forward	tumor	-3075	GRTR	G	1	12.05	0.0829876	GRTR forward
forward	tumor	-3075	other	C	1	2.8	0.357143	other forward
forward	tumor	-3075	other	G	1	5	0.2	other forward
forward	tumor	-3025	CRTR	C	8	3.05	2.62295	CRTR forward
forward	tumor	-3025	CRTR	G	1	1.05	0.952381	CRTR forward
forward	tumor	-3025	GRTR	C	1	1	1	GRTR forward
forward	tumor	-3025	GRTR	G	1	12.05	0.0829876	GRTR forward
forward	tumor	-3025	other	C	1	2.8	0.357143	other forward
forward	tumor	-3025	other	G	1	5	0.2	other forward
forward	tumor	-2975	CRTR	C	3	3.05	0.983607	CRTR forward
forward	tumor	-2975	CRTR	G	1	1.05	0.952381	CRTR forward
forward	tumor	-2975	GRTR	C	1	1	1	GRTR forward
forward	tumor	-2975	GRTR	G	2	12.05	0.165975	GRTR forward
forward	tumor	-2975	other	C	1	2.8	0.357143	other forward
forward	tumor	-2975	other	G	1	5	0.2	other forward
forward	tumor	-2925	CRTR	C	1	3.05	0.327869	CRTR forward
forward	tumor	-2925	CRTR	G	1	1.05	0.952381	CRTR forward
forward	tumor	-2925	GRTR	C	1	1	1	GRTR forward
forward	tumor	-2925	GRTR	G	4	12.05	0.33195	GRTR forward
forward	tumor	-2925	other	C	1	2.8	0.357143	other forward
forward	tumor	-2925	other	G	1	5	0.2	other forward
forward	tumor	-2875	CRTR	C	1	3.05	0.327869	CRTR forward
forward	tumor	-2875	CRTR	G	1	1.05	0.952381	CRTR forward
forward	tumor	-2875	GRTR	C	1	1	1	GRTR forward
forward	tumor	-2875	GRTR	G	2	12.05	0.165975	GRTR forward
forward	tumor	-2875	other	C	1	2.8	0.357143	other forward
forward	tumor	-2875	other	G	1	5	0.2	other forward
forward	tumor	-2825	CRTR	C	1	3.05	0.327869	CRTR forward
forward	tumor	-2825	CRTR	G	1	1.05	0.952381	CRTR forward
forward	tumor	-2825	GRTR	C	1	1	1	GRTR forward
forward	tumor	-2825	GRTR	G	1	12.05	0.0829876	GRTR forward
forward	tumor	-2825	other	C	1	2.8	0.357143	other forward
forward	tumor	-2825	other	G	4	5	0.8	other forward
forward	tumor	-2775	CRTR	C	1	3.05	0.327869	CRTR forward
forward	tumor	-2775	CRTR	G	1	1.05	0.952381	CRTR forward
forward	tumor	-2775	GRTR	C	1	1	1	GRTR forward
forward	tumor	-2775	GRTR	G	1	12.05	0.0829876	GRTR forward
forward	tumor	-2775	other	C	1	2.8	0.357143	other forward
forward	tumor	-2775	other	G	1	5	0.2	other forward
forward	tumor	-2725	CRTR	C	1	3.05	0.327869	CRTR forward
forward	tumor	-2725	CRTR	G	1	1.05	0.952381	CRTR forward
forward	tumor	-2725	GRTR	C	1	1	1	GRTR forward
forward	tumor	-2725	GRTR	G	1	12.05	0.0829876	GRTR forward
forward	tumor	-2725	other	C	1	2.8	0.357143	other forward
forward	tumor	-2725	other	G	5	5	1	other forward
forward	tumor	-2675	CRTR	C	1	3.05	0.327869	CRTR forward
forward	tumor	-2675	CRTR	G	1	1.05	0.952381	CRTR forward
forward	tumor	-2675	GRTR	C	1	1	1	GRTR forward
forward	tumor	-2675	GRTR	G	3	12.05	0.248963	GRTR forward
forward	tumor	-2675	other	C	1	2.8	0.357143	other forward
forward	tumor	-2675	other	G	1	5	0.2	other forward
forward	tumor	-2625	CRTR	C	1	3.05	0.327869	CRTR forward
forward	tumor	-2625	CRTR	G	1	1.05	0.952381	CRTR forward
forward	tumor	-2625	GRTR	C	1	1	1	GRTR forward
forward	tumor	-2625	GRTR	G	6	12.05	0.497925	GRTR forward
forward	tumor	-2625	other	C	1	2.8	0.357143	other forward
forward	tumor	-2625	other	G	2	5	0.4	other forward
forward	tumor	-2575	CRTR	C	1	3.05	0.327869	CRTR forward
forward	tumor	-2575	CRTR	G	1	1.05	0.952381	CRTR forward
forward	tumor	-2575	GRTR	C	1	1	1	GRTR forward
forward	tumor	-2575	GRTR	G	7	12.05	0.580913	GRTR forward
forward	tumor	-2575	other	C	1	2.8	0.357143	other forward
forward	tumor	-2575	other	G	1	5	0.2	other forward
forward	tumor	-2525	CRTR	C	1	3.05	0.327869	CRTR forward
forward	tumor	-2525	CRTR	G	1	1.05	0.952381	CRTR forward
forward	tumor	-2525	GRTR	C	1	1	1	GRTR forward
forward	tumor	-2525	GRTR	G	4	12.05	0.33195	GRTR forward
forward	tumor	-2525	other	C	1	2.8	0.357143	other forward
forward	tumor	-2525	other	G	1	5	0.2	other forward
forward	tumor	-2475	CRTR	C	1	3.05	0.327869	CRTR forward
forward	tumor	-2475	CRTR	G	1	1.05	0.952381	CRTR forward
forward	tumor	-2475	GRTR	C	1	1	1	GRTR forward
forward	tumor	-2475	GRTR	G	2	12.05	0.165975	GRTR forward
forward	tumor	-2475	other	C	1	2.8	0.357143	other forward
forward	tumor	-2475	other	G	1	5	0.2	other forward
forward	tumor	-2425	CRTR	C	1	3.05	0.327869	CRTR forward
forward	tumor	-2425	CRTR	G	1	1.05	0.952381	CRTR forward
forward	tumor	-2425	GRTR	C	1	1	1	GRTR forward
forward	tumor	-2425	GRTR	G	3	12.05	0.248963	GRTR forward
forward	tumor	-2425	other	C	1	2.8	0.357143	other forward
forward	tumor	-2425	other	G	2	5	0.4	other forward
forward	tumor	-2375	CRTR	C	1	3.05	0.327869	CRTR forward
forward	tumor	-2375	CRTR	G	1	1.05	0.952381	CRTR forward
forward	tumor	-2375	GRTR	C	1	1	1	GRTR forward
forward	tumor	-2375	GRTR	G	2	12.05	0.165975	GRTR forward
forward	tumor	-2375	other	C	1	2.8	0.357143	other forward
forward	tumor	-2375	other	G	1	5	0.2	other forward
forward	tumor	-2325	CRTR	C	1	3.05	0.327869	CRTR forward
forward	tumor	-2325	CRTR	G	1	1.05	0.952381	CRTR forward
forward	tumor	-2325	GRTR	C	1	1	1	GRTR forward
forward	tumor	-2325	GRTR	G	1	12.05	0.0829876	GRTR forward
forward	tumor	-2325	other	C	1	2.8	0.357143	other forward
forward	tumor	-2325	other	G	1	5	0.2	other forward
forward	tumor	-2275	CRTR	C	3	3.05	0.983607	CRTR forward
forward	tumor	-2275	CRTR	G	1	1.05	0.952381	CRTR forward
forward	tumor	-2275	GRTR	C	1	1	1	GRTR forward
forward	tumor	-2275	GRTR	G	1	12.05	0.0829876	GRTR forward
forward	tumor	-2275	other	C	4	2.8	1.42857	other forward
forward	tumor	-2275	other	G	2	5	0.4	other forward
forward	tumor	-2225	CRTR	C	1	3.05	0.327869	CRTR forward
forward	tumor	-2225	CRTR	G	1	1.05	0.952381	CRTR forward
forward	tumor	-2225	GRTR	C	1	1	1	GRTR forward
forward	tumor	-2225	GRTR	G	4	12.05	0.33195	GRTR forward
forward	tumor	-2225	other	C	1	2.8	0.357143	other forward
forward	tumor	-2225	other	G	1	5	0.2	other forward
forward	tumor	-2175	CRTR	C	1	3.05	0.327869	CRTR forward
forward	tumor	-2175	CRTR	G	1	1.05	0.952381	CRTR forward
forward	tumor	-2175	GRTR	C	1	1	1	GRTR forward
forward	tumor	-2175	GRTR	G	2	12.05	0.165975	GRTR forward
forward	tumor	-2175	other	C	3	2.8	1.07143	other forward
forward	tumor	-2175	other	G	1	5	0.2	other forward
forward	tumor	-2125	CRTR	C	1	3.05	0.327869	CRTR forward
forward	tumor	-2125	CRTR	G	1	1.05	0.952381	CRTR forward
forward	tumor	-2125	GRTR	C	1	1	1	GRTR forward
forward	tumor	-2125	GRTR	G	2	12.05	0.165975	GRTR forward
forward	tumor	-2125	other	C	2	2.8	0.714286	other forward
forward	tumor	-2125	other	G	1	5	0.2	other forward
forward	tumor	-2075	CRTR	C	1	3.05	0.327869	CRTR forward
forward	tumor	-2075	CRTR	G	1	1.05	0.952381	CRTR forward
forward	tumor	-2075	GRTR	C	1	1	1	GRTR forward
forward	tumor	-2075	GRTR	G	1	12.05	0.0829876	GRTR forward
forward	tumor	-2075	other	C	1	2.8	0.357143	other forward
forward	tumor	-2075	other	G	1	5	0.2	other forward
forward	tumor	-2025	CRTR	C	1	3.05	0.327869	CRTR forward
forward	tumor	-2025	CRTR	G	1	1.05	0.952381	CRTR forward
forward	tumor	-2025	GRTR	C	1	1	1	GRTR forward
forward	tumor	-2025	GRTR	G	1	12.05	0.0829876	GRTR forward
forward	tumor	-2025	other	C	1	2.8	0.357143	other forward
forward	tumor	-2025	other	G	1	5	0.2	other forward
forward	tumor	-1975	CRTR	C	1	3.05	0.327869	CRTR forward
forward	tumor	-1975	CRTR	G	1	1.05	0.952381	CRTR forward
forward	tumor	-1975	GRTR	C	1	1	1	GRTR forward
forward	tumor	-1975	GRTR	G	7	12.05	0.580913	GRTR forward
forward	tumor	-1975	other	C	1	2.8	0.357143	other forward
forward	tumor	-1975	other	G	1	5	0.2	other forward
forward	tumor	-1925	CRTR	C	1	3.05	0.327869	CRTR forward
forward	tumor	-1925	CRTR	G	1	1.05	0.952381	CRTR forward
forward	tumor	-1925	GRTR	C	1	1	1	GRTR forward
forward	tumor	-1925	GRTR	G	1	12.05	0.0829876	GRTR forward
forward	tumor	-1925	other	C	1	2.8	0.357143	other forward
forward	tumor	-1925	other	G	1	5	0.2	other forward
forward	tumor	-1875	CRTR	C	3	3.05	0.983607	CRTR forward
forward	tumor	-1875	CRTR	G	1	1.05	0.952381	CRTR forward
forward	tumor	-1875	GRTR	C	1	1	1	GRTR forward
forward	tumor	-1875	GRTR	G	3	12.05	0.248963	GRTR forward
forward	tumor	-1875	other	C	1	2.8	0.357143	other forward
forward	tumor	-1875	other	G	6	5	1.2	other forward
forward	tumor	-1825	CRTR	C	11	3.05	3.60656	CRTR forward
forward	tumor	-1825	CRTR	G	1	1.05	0.952381	CRTR forward
forward	tumor	-1825	GRTR	C	1	1	1	GRTR forward
forward	tumor	-1825	GRTR	G	8	12.05	0.6639	GRTR forward
forward	tumor	-1825	other	C	1	2.8	0.357143	other forward
forward	tumor	-1825	other	G	10	5	2	other forward
forward	tumor	-1775	CRTR	C	7	3.05	2.29508	CRTR forward
forward	tumor	-1775	CRTR	G	1	1.05	0.952381	CRTR forward
forward	tumor	-1775	GRTR	C	1	1	1	GRTR forward
forward	tumor	-1775	GRTR	G	11	12.05	0.912863	GRTR forward
forward	tumor	-1775	other	C	2	2.8	0.714286	other forward
forward	tumor	-1775	other	G	3	5	0.6	other forward
forward	tumor	-1725	CRTR	C	5	3.05	1.63934	CRTR forward
forward	tumor	-1725	CRTR	G	1	1.05	0.952381	CRTR forward
forward	tumor	-1725	GRTR	C	1	1	1	GRTR forward
forward	tumor	-1725	GRTR	G	9	12.05	0.746888	GRTR forward
forward	tumor	-1725	other	C	5	2.8	1.78571	other forward
forward	tumor	-1725	other	G	6	5	1.2	other forward
forward	tumor	-1675	CRTR	C	1	3.05	0.327869	CRTR forward
forward	tumor	-1675	CRTR	G	1	1.05	0.952381	CRTR forward
forward	tumor	-1675	GRTR	C	1	1	1	GRTR forward
forward	tumor	-1675	GRTR	G	11	12.05	0.912863	GRTR forward
forward	tumor	-1675	other	C	2	2.8	0.714286	other forward
forward	tumor	-1675	other	G	6	5	1.2	other forward
forward	tumor	-1625	CRTR	C	4	3.05	1.31148	CRTR forward
forward	tumor	-1625	CRTR	G	2	1.05	1.90476	CRTR forward
forward	tumor	-1625	GRTR	C	1	1	1	GRTR forward
forward	tumor	-1625	GRTR	G	9	12.05	0.746888	GRTR forward
forward	tumor	-1625	other	C	2	2.8	0.714286	other forward
forward	tumor	-1625	other	G	4	5	0.8	other forward
forward	tumor	-1575	CRTR	C	1	3.05	0.327869	CRTR forward
forward	tumor	-1575	CRTR	G	1	1.05	0.952381	CRTR forward
forward	tumor	-1575	GRTR	C	1	1	1	GRTR forward
forward	tumor	-1575	GRTR	G	10	12.05	0.829876	GRTR forward
forward	tumor	-1575	other	C	2	2.8	0.714286	other forward
forward	tumor	-1575	other	G	3	5	0.6	other forward
forward	tumor	-1525	CRTR	C	2	3.05	0.655738	CRTR forward
forward	tumor	-1525	CRTR	G	1	1.05	0.952381	CRTR forward
forward	tumor	-1525	GRTR	C	1	1	1	GRTR forward
forward	tumor	-1525	GRTR	G	8	12.05	0.6639	GRTR forward
forward	tumor	-1525	other	C	1	2.8	0.357143	other forward
forward	tumor	-1525	other	G	3	5	0.6	other forward
forward	tumor	-1475	CRTR	C	4	3.05	1.31148	CRTR forward
forward	tumor	-1475	CRTR	G	1	1.05	0.952381	CRTR forward
forward	tumor	-1475	GRTR	C	1	1	1	GRTR forward
forward	tumor	-1475	GRTR	G	10	12.05	0.829876	GRTR forward
forward	tumor	-1475	other	C	1	2.8	0.357143	other forward
forward	tumor	-1475	other	G	5	5	1	other forward
forward	tumor	-1425	CRTR	C	8	3.05	2.62295	CRTR forward
forward	tumor	-1425	CRTR	G	1	1.05	0.952381	CRTR forward
forward	tumor	-1425	GRTR	C	1	1	1	GRTR forward
forward	tumor	-1425	GRTR	G	15	12.05	1.24481	GRTR forward
forward	tumor	-1425	other	C	7	2.8	2.5	other forward
forward	tumor	-1425	other	G	9	5	1.8	other forward
forward	tumor	-1375	CRTR	C	3	3.05	0.983607	CRTR forward
forward	tumor	-1375	CRTR	G	1	1.05	0.952381	CRTR forward
forward	tumor	-1375	GRTR	C	1	1	1	GRTR forward
forward	tumor	-1375	GRTR	G	20	12.05	1.65975	GRTR forward
forward	tumor	-1375	other	C	4	2.8	1.42857	other forward
forward	tumor	-1375	other	G	9	5	1.8	other forward
forward	tumor	-1325	CRTR	C	1	3.05	0.327869	CRTR forward
forward	tumor	-1325	CRTR	G	1	1.05	0.952381	CRTR forward
forward	tumor	-1325	GRTR	C	1	1	1	GRTR forward
forward	tumor	-1325	GRTR	G	16	12.05	1.3278	GRTR forward
forward	tumor	-1325	other	C	1	2.8	0.357143	other forward
forward	tumor	-1325	other	G	5	5	1	other forward
forward	tumor	-1275	CRTR	C	1	3.05	0.327869	CRTR forward
forward	tumor	-1275	CRTR	G	1	1.05	0.952381	CRTR forward
forward	tumor	-1275	GRTR	C	1	1	1	GRTR forward
forward	tumor	-1275	GRTR	G	22	12.05	1.82573	GRTR forward
forward	tumor	-1275	other	C	3	2.8	1.07143	other forward
forward	tumor	-1275	other	G	5	5	1	other forward
forward	tumor	-1225	CRTR	C	1	3.05	0.327869	CRTR forward
forward	tumor	-1225	CRTR	G	1	1.05	0.952381	CRTR forward
forward	tumor	-1225	GRTR	C	1	1	1	GRTR forward
forward	tumor	-1225	GRTR	G	14	12.05	1.16183	GRTR forward
forward	tumor	-1225	other	C	1	2.8	0.357143	other forward
forward	tumor	-1225	other	G	2	5	0.4	other forward
forward	tumor	-1175	CRTR	C	2	3.05	0.655738	CRTR forward
forward	tumor	-1175	CRTR	G	1	1.05	0.952381	CRTR forward
forward	tumor	-1175	GRTR	C	1	1	1	GRTR forward
forward	tumor	-1175	GRTR	G	23	12.05	1.90871	GRTR forward
forward	tumor	-1175	other	C	1	2.8	0.357143	other forward
forward	tumor	-1175	other	G	8	5	1.6	other forward
forward	tumor	-1125	CRTR	C	1	3.05	0.327869	CRTR forward
forward	tumor	-1125	CRTR	G	1	1.05	0.952381	CRTR forward
forward	tumor	-1125	GRTR	C	1	1	1	GRTR forward
forward	tumor	-1125	GRTR	G	19	12.05	1.57676	GRTR forward
forward	tumor	-1125	other	C	3	2.8	1.07143	other forward
forward	tumor	-1125	other	G	9	5	1.8	other forward
forward	tumor	-1075	CRTR	C	3	3.05	0.983607	CRTR forward
forward	tumor	-1075	CRTR	G	1	1.05	0.952381	CRTR forward
forward	tumor	-1075	GRTR	C	1	1	1	GRTR forward
forward	tumor	-1075	GRTR	G	16	12.05	1.3278	GRTR forward
forward	tumor	-1075	other	C	7	2.8	2.5	other forward
forward	tumor	-1075	other	G	2	5	0.4	other forward
forward	tumor	-1025	CRTR	C	1	3.05	0.327869	CRTR forward
forward	tumor	-1025	CRTR	G	1	1.05	0.952381	CRTR forward
forward	tumor	-1025	GRTR	C	1	1	1	GRTR forward
forward	tumor	-1025	GRTR	G	9	12.05	0.746888	GRTR forward
forward	tumor	-1025	other	C	10	2.8	3.57143	other forward
forward	tumor	-1025	other	G	3	5	0.6	other forward
forward	tumor	-975	CRTR	C	1	3.05	0.327869	CRTR forward
forward	tumor	-975	CRTR	G	1	1.05	0.952381	CRTR forward
forward	tumor	-975	GRTR	C	1	1	1	GRTR forward
forward	tumor	-975	GRTR	G	15	12.05	1.24481	GRTR forward
forward	tumor	-975	other	C	7	2.8	2.5	other forward
forward	tumor	-975	other	G	5	5	1	other forward
forward	tumor	-925	CRTR	C	1	3.05	0.327869	CRTR forward
forward	tumor	-925	CRTR	G	1	1.05	0.952381	CRTR forward
forward	tumor	-925	GRTR	C	1	1	1	GRTR forward
forward	tumor	-925	GRTR	G	6	12.05	0.497925	GRTR forward
forward	tumor	-925	other	C	5	2.8	1.78571	other forward
forward	tumor	-925	other	G	4	5	0.8	other forward
forward	tumor	-875	CRTR	C	3	3.05	0.983607	CRTR forward
forward	tumor	-875	CRTR	G	2	1.05	1.90476	CRTR forward
forward	tumor	-875	GRTR	C	1	1	1	GRTR forward
forward	tumor	-875	GRTR	G	21	12.05	1.74274	GRTR forward
forward	tumor	-875	other	C	12	2.8	4.28571	other forward
forward	tumor	-875	other	G	2	5	0.4	other forward
forward	tumor	-825	CRTR	C	2	3.05	0.655738	CRTR forward
forward	tumor	-825	CRTR	G	2	1.05	1.90476	CRTR forward
forward	tumor	-825	GRTR	C	1	1	1	GRTR forward
forward	tumor	-825	GRTR	G	17	12.05	1.41079	GRTR forward
forward	tumor	-825	other	C	3	2.8	1.07143	other forward
forward	tumor	-825	other	G	5	5	1	other forward
forward	tumor	-775	CRTR	C	3	3.05	0.983607	CRTR forward
forward	tumor	-775	CRTR	G	2	1.05	1.90476	CRTR forward
forward	tumor	-775	GRTR	C	1	1	1	GRTR forward
forward	tumor	-775	GRTR	G	22	12.05	1.82573	GRTR forward
forward	tumor	-775	other	C	2	2.8	0.714286	other forward
forward	tumor	-775	other	G	4	5	0.8	other forward
forward	tumor	-725	CRTR	C	10	3.05	3.27869	CRTR forward
forward	tumor	-725	CRTR	G	1	1.05	0.952381	CRTR forward
forward	tumor	-725	GRTR	C	1	1	1	GRTR forward
forward	tumor	-725	GRTR	G	13	12.05	1.07884	GRTR forward
forward	tumor	-725	other	C	2	2.8	0.714286	other forward
forward	tumor	-725	other	G	10	5	2	other forward
forward	tumor	-675	CRTR	C	32	3.05	10.4918	CRTR forward
forward	tumor	-675	CRTR	G	1	1.05	0.952381	CRTR forward
forward	tumor	-675	GRTR	C	1	1	1	GRTR forward
forward	tumor	-675	GRTR	G	38	12.05	3.15353	GRTR forward
forward	tumor	-675	other	C	5	2.8	1.78571	other forward
forward	tumor	-675	other	G	6	5	1.2	other forward
forward	tumor	-625	CRTR	C	51	3.05	16.7213	CRTR forward
forward	tumor	-625	CRTR	G	1	1.05	0.952381	CRTR forward
forward	tumor	-625	GRTR	C	1	1	1	GRTR forward
forward	tumor	-625	GRTR	G	27	12.05	2.24066	GRTR forward
forward	tumor	-625	other	C	8	2.8	2.85714	other forward
forward	tumor	-625	other	G	17	5	3.4	other forward
forward	tumor	-575	CRTR	C	59	3.05	19.3443	CRTR forward
forward	tumor	-575	CRTR	G	1	1.05	0.952381	CRTR forward
forward	tumor	-575	GRTR	C	1	1	1	GRTR forward
forward	tumor	-575	GRTR	G	62	12.05	5.14523	GRTR forward
forward	tumor	-575	other	C	8	2.8	2.85714	other forward
forward	tumor	-575	other	G	10	5	2	other forward
forward	tumor	-525	CRTR	C	163	3.05	53.4426	CRTR forward
forward	tumor	-525	CRTR	G	1	1.05	0.952381	CRTR forward
forward	tumor	-525	GRTR	C	1	1	1	GRTR forward
forward	tumor	-525	GRTR	G	121	12.05	10.0415	GRTR forward
forward	tumor	-525	other	C	5	2.8	1.78571	other forward
forward	tumor	-525	other	G	14	5	2.8	other forward
forward	tumor	-475	CRTR	C	135	3.05	44.2623	CRTR forward
forward	tumor	-475	CRTR	G	1	1.05	0.952381	CRTR forward
forward	tumor	-475	GRTR	C	1	1	1	GRTR forward
forward	tumor	-475	GRTR	G	152	12.05	12.6141	GRTR forward
forward	tumor	-475	other	C	20	2.8	7.14286	other forward
forward	tumor	-475	other	G	20	5	4	other forward
forward	tumor	-425	CRTR	C	65	3.05	21.3115	CRTR forward
forward	tumor	-425	CRTR	G	1	1.05	0.952381	CRTR forward
forward	tumor	-425	GRTR	C	1	1	1	GRTR forward
forward	tumor	-425	GRTR	G	165	12.05	13.6929	GRTR forward
forward	tumor	-425	other	C	24	2.8	8.57143	other forward
forward	tumor	-425	other	G	29	5	5.8	other forward
forward	tumor	-375	CRTR	C	96	3.05	31.4754	CRTR forward
forward	tumor	-375	CRTR	G	1	1.05	0.952381	CRTR forward
forward	tumor	-375	GRTR	C	1	1	1	GRTR forward
forward	tumor	-375	GRTR	G	182	12.05	15.1037	GRTR forward
forward	tumor	-375	other	C	34	2.8	12.1429	other forward
forward	tumor	-375	other	G	39	5	7.8	other forward
forward	tumor	-325	CRTR	C	65	3.05	21.3115	CRTR forward
forward	tumor	-325	CRTR	G	1	1.05	0.952381	CRTR forward
forward	tumor	-325	GRTR	C	1	1	1	GRTR forward
forward	tumor	-325	GRTR	G	127	12.05	10.5394	GRTR forward
forward	tumor	-325	other	C	26	2.8	9.28571	other forward
forward	tumor	-325	other	G	36	5	7.2	other forward
forward	tumor	-275	CRTR	C	29	3.05	9.5082	CRTR forward
forward	tumor	-275	CRTR	G	1	1.05	0.952381	CRTR forward
forward	tumor	-275	GRTR	C	1	1	1	GRTR forward
forward	tumor	-275	GRTR	G	173	12.05	14.3568	GRTR forward
forward	tumor	-275	other	C	32	2.8	11.4286	other forward
forward	tumor	-275	other	G	55	5	11	other forward
forward	tumor	-225	CRTR	C	64	3.05	20.9836	CRTR forward
forward	tumor	-225	CRTR	G	1	1.05	0.952381	CRTR forward
forward	tumor	-225	GRTR	C	1	1	1	GRTR forward
forward	tumor	-225	GRTR	G	167	12.05	13.8589	GRTR forward
forward	tumor	-225	other	C	25	2.8	8.92857	other forward
forward	tumor	-225	other	G	51	5	10.2	other forward
forward	tumor	-175	CRTR	C	78	3.05	25.5738	CRTR forward
forward	tumor	-175	CRTR	G	1	1.05	0.952381	CRTR forward
forward	tumor	-175	GRTR	C	1	1	1	GRTR forward
forward	tumor	-175	GRTR	G	232	12.05	19.2531	GRTR forward
forward	tumor	-175	other	C	23	2.8	8.21429	other forward
forward	tumor	-175	other	G	48	5	9.6	other forward
forward	tumor	-125	CRTR	C	108	3.05	35.4098	CRTR forward
forward	tumor	-125	CRTR	G	1	1.05	0.952381	CRTR forward
forward	tumor	-125	GRTR	C	1	1	1	GRTR forward
forward	tumor	-125	GRTR	G	231	12.05	19.1701	GRTR forward
forward	tumor	-125	other	C	18	2.8	6.42857	other forward
forward	tumor	-125	other	G	42	5	8.4	other forward
forward	tumor	-75	CRTR	C	112	3.05	36.7213	CRTR forward
forward	tumor	-75	CRTR	G	1	1.05	0.952381	CRTR forward
forward	tumor	-75	GRTR	C	1	1	1	GRTR forward
forward	tumor	-75	GRTR	G	274	12.05	22.7386	GRTR forward
forward	tumor	-75	other	C	10	2.8	3.57143	other forward
forward	tumor	-75	other	G	29	5	5.8	other forward
forward	tumor	-25	CRTR	C	113	3.05	37.0492	CRTR forward
forward	tumor	-25	CRTR	G	1	1.05	0.952381	CRTR forward
forward	tumor	-25	GRTR	C	1	1	1	GRTR forward
forward	tumor	-25	GRTR	G	350	12.05	29.0456	GRTR forward
forward	tumor	-25	other	C	14	2.8	5	other forward
forward	tumor	-25	other	G	43	5	8.6	other forward
forward	tumor	25	CRTR	C	310	3.05	101.639	CRTR forward
forward	tumor	25	CRTR	G	1	1.05	0.952381	CRTR forward
forward	tumor	25	GRTR	C	1	1	1	GRTR forward
forward	tumor	25	GRTR	G	831	12.05	68.9627	GRTR forward
forward	tumor	25	other	C	57	2.8	20.3571	other forward
forward	tumor	25	other	G	89	5	17.8	other forward
forward	tumor	75	CRTR	C	265	3.05	86.8852	CRTR forward
forward	tumor	75	CRTR	G	1	1.05	0.952381	CRTR forward
forward	tumor	75	GRTR	C	1	1	1	GRTR forward
forward	tumor	75	GRTR	G	598	12.05	49.6266	GRTR forward
forward	tumor	75	other	C	61	2.8	21.7857	other forward
forward	tumor	75	other	G	64	5	12.8	other forward
forward	tumor	125	CRTR	C	213	3.05	69.8361	CRTR forward
forward	tumor	125	CRTR	G	1	1.05	0.952381	CRTR forward
forward	tumor	125	GRTR	C	1	1	1	GRTR forward
forward	tumor	125	GRTR	G	495	12.05	41.0788	GRTR forward
forward	tumor	125	other	C	33	2.8	11.7857	other forward
forward	tumor	125	other	G	48	5	9.6	other forward
forward	tumor	175	CRTR	C	184	3.05	60.3279	CRTR forward
forward	tumor	175	CRTR	G	1	1.05	0.952381	CRTR forward
forward	tumor	175	GRTR	C	1	1	1	GRTR forward
forward	tumor	175	GRTR	G	414	12.05	34.3568	GRTR forward
forward	tumor	175	other	C	27	2.8	9.64286	other forward
forward	tumor	175	other	G	52	5	10.4	other forward
forward	tumor	225	CRTR	C	169	3.05	55.4098	CRTR forward
forward	tumor	225	CRTR	G	2	1.05	1.90476	CRTR forward
forward	tumor	225	GRTR	C	1	1	1	GRTR forward
forward	tumor	225	GRTR	G	266	12.05	22.0747	GRTR forward
forward	tumor	225	other	C	26	2.8	9.28571	other forward
forward	tumor	225	other	G	37	5	7.4	other forward
forward	tumor	275	CRTR	C	132	3.05	43.2787	CRTR forward
forward	tumor	275	CRTR	G	1	1.05	0.952381	CRTR forward
forward	tumor	275	GRTR	C	1	1	1	GRTR forward
forward	tumor	275	GRTR	G	232	12.05	19.2531	GRTR forward
forward	tumor	275	other	C	13	2.8	4.64286	other forward
forward	tumor	275	other	G	37	5	7.4	other forward
forward	tumor	325	CRTR	C	122	3.05	40	CRTR forward
forward	tumor	325	CRTR	G	1	1.05	0.952381	CRTR forward
forward	tumor	325	GRTR	C	1	1	1	GRTR forward
forward	tumor	325	GRTR	G	155	12.05	12.8631	GRTR forward
forward	tumor	325	other	C	11	2.8	3.92857	other forward
forward	tumor	325	other	G	32	5	6.4	other forward
forward	tumor	375	CRTR	C	82	3.05	26.8852	CRTR forward
forward	tumor	375	CRTR	G	1	1.05	0.952381	CRTR forward
forward	tumor	375	GRTR	C	1	1	1	GRTR forward
forward	tumor	375	GRTR	G	215	12.05	17.8423	GRTR forward
forward	tumor	375	other	C	8	2.8	2.85714	other forward
forward	tumor	375	other	G	13	5	2.6	other forward
forward	tumor	425	CRTR	C	71	3.05	23.2787	CRTR forward
forward	tumor	425	CRTR	G	1	1.05	0.952381	CRTR forward
forward	tumor	425	GRTR	C	1	1	1	GRTR forward
forward	tumor	425	GRTR	G	167	12.05	13.8589	GRTR forward
forward	tumor	425	other	C	18	2.8	6.42857	other forward
forward	tumor	425	other	G	12	5	2.4	other forward
forward	tumor	475	CRTR	C	78	3.05	25.5738	CRTR forward
forward	tumor	475	CRTR	G	1	1.05	0.952381	CRTR forward
forward	tumor	475	GRTR	C	1	1	1	GRTR forward
forward	tumor	475	GRTR	G	170	12.05	14.1079	GRTR forward
forward	tumor	475	other	C	10	2.8	3.57143	other forward
forward	tumor	475	other	G	32	5	6.4	other forward
forward	tumor	525	CRTR	C	84	3.05	27.541	CRTR forward
forward	tumor	525	CRTR	G	1	1.05	0.952381	CRTR forward
forward	tumor	525	GRTR	C	1	1	1	GRTR forward
forward	tumor	525	GRTR	G	112	12.05	9.29461	GRTR forward
forward	tumor	525	other	C	10	2.8	3.57143	other forward
forward	tumor	525	other	G	26	5	5.2	other forward
forward	tumor	575	CRTR	C	67	3.05	21.9672	CRTR forward
forward	tumor	575	CRTR	G	1	1.05	0.952381	CRTR forward
forward	tumor	575	GRTR	C	1	1	1	GRTR forward
forward	tumor	575	GRTR	G	111	12.05	9.21162	GRTR forward
forward	tumor	575	other	C	6	2.8	2.14286	other forward
forward	tumor	575	other	G	34	5	6.8	other forward
forward	tumor	625	CRTR	C	55	3.05	18.0328	CRTR forward
forward	tumor	625	CRTR	G	1	1.05	0.952381	CRTR forward
forward	tumor	625	GRTR	C	1	1	1	GRTR forward
forward	tumor	625	GRTR	G	123	12.05	10.2075	GRTR forward
forward	tumor	625	other	C	2	2.8	0.714286	other forward
forward	tumor	625	other	G	24	5	4.8	other forward
forward	tumor	675	CRTR	C	38	3.05	12.459	CRTR forward
forward	tumor	675	CRTR	G	1	1.05	0.952381	CRTR forward
forward	tumor	675	GRTR	C	1	1	1	GRTR forward
forward	tumor	675	GRTR	G	114	12.05	9.46058	GRTR forward
forward	tumor	675	other	C	8	2.8	2.85714	other forward
forward	tumor	675	other	G	19	5	3.8	other forward
forward	tumor	725	CRTR	C	23	3.05	7.54098	CRTR forward
forward	tumor	725	CRTR	G	1	1.05	0.952381	CRTR forward
forward	tumor	725	GRTR	C	1	1	1	GRTR forward
forward	tumor	725	GRTR	G	70	12.05	5.80913	GRTR forward
forward	tumor	725	other	C	8	2.8	2.85714	other forward
forward	tumor	725	other	G	29	5	5.8	other forward
forward	tumor	775	CRTR	C	22	3.05	7.21311	CRTR forward
forward	tumor	775	CRTR	G	1	1.05	0.952381	CRTR forward
forward	tumor	775	GRTR	C	1	1	1	GRTR forward
forward	tumor	775	GRTR	G	84	12.05	6.97095	GRTR forward
forward	tumor	775	other	C	10	2.8	3.57143	other forward
forward	tumor	775	other	G	12	5	2.4	other forward
forward	tumor	825	CRTR	C	8	3.05	2.62295	CRTR forward
forward	tumor	825	CRTR	G	1	1.05	0.952381	CRTR forward
forward	tumor	825	GRTR	C	1	1	1	GRTR forward
forward	tumor	825	GRTR	G	48	12.05	3.9834	GRTR forward
forward	tumor	825	other	C	14	2.8	5	other forward
forward	tumor	825	other	G	10	5	2	other forward
forward	tumor	875	CRTR	C	16	3.05	5.2459	CRTR forward
forward	tumor	875	CRTR	G	1	1.05	0.952381	CRTR forward
forward	tumor	875	GRTR	C	1	1	1	GRTR forward
forward	tumor	875	GRTR	G	54	12.05	4.48133	GRTR forward
forward	tumor	875	other	C	4	2.8	1.42857	other forward
forward	tumor	875	other	G	1	5	0.2	other forward
forward	tumor	925	CRTR	C	10	3.05	3.27869	CRTR forward
forward	tumor	925	CRTR	G	1	1.05	0.952381	CRTR forward
forward	tumor	925	GRTR	C	1	1	1	GRTR forward
forward	tumor	925	GRTR	G	26	12.05	2.15768	GRTR forward
forward	tumor	925	other	C	3	2.8	1.07143	other forward
forward	tumor	925	other	G	7	5	1.4	other forward
forward	tumor	975	CRTR	C	11	3.05	3.60656	CRTR forward
forward	tumor	975	CRTR	G	1	1.05	0.952381	CRTR forward
forward	tumor	975	GRTR	C	1	1	1	GRTR forward
forward	tumor	975	GRTR	G	24	12.05	1.9917	GRTR forward
forward	tumor	975	other	C	2	2.8	0.714286	other forward
forward	tumor	975	other	G	5	5	1	other forward
forward	tumor	1025	CRTR	C	1	3.05	0.327869	CRTR forward
forward	tumor	1025	CRTR	G	1	1.05	0.952381	CRTR forward
forward	tumor	1025	GRTR	C	1	1	1	GRTR forward
forward	tumor	1025	GRTR	G	22	12.05	1.82573	GRTR forward
forward	tumor	1025	other	C	6	2.8	2.14286	other forward
forward	tumor	1025	other	G	5	5	1	other forward
forward	tumor	1075	CRTR	C	1	3.05	0.327869	CRTR forward
forward	tumor	1075	CRTR	G	1	1.05	0.952381	CRTR forward
forward	tumor	1075	GRTR	C	1	1	1	GRTR forward
forward	tumor	1075	GRTR	G	12	12.05	0.995851	GRTR forward
forward	tumor	1075	other	C	7	2.8	2.5	other forward
forward	tumor	1075	other	G	8	5	1.6	other forward
forward	tumor	1125	CRTR	C	9	3.05	2.95082	CRTR forward
forward	tumor	1125	CRTR	G	1	1.05	0.952381	CRTR forward
forward	tumor	1125	GRTR	C	1	1	1	GRTR forward
forward	tumor	1125	GRTR	G	12	12.05	0.995851	GRTR forward
forward	tumor	1125	other	C	1	2.8	0.357143	other forward
forward	tumor	1125	other	G	4	5	0.8	other forward
forward	tumor	1175	CRTR	C	17	3.05	5.57377	CRTR forward
forward	tumor	1175	CRTR	G	1	1.05	0.952381	CRTR forward
forward	tumor	1175	GRTR	C	1	1	1	GRTR forward
forward	tumor	1175	GRTR	G	10	12.05	0.829876	GRTR forward
forward	tumor	1175	other	C	3	2.8	1.07143	other forward
forward	tumor	1175	other	G	7	5	1.4	other forward
forward	tumor	1225	CRTR	C	5	3.05	1.63934	CRTR forward
forward	tumor	1225	CRTR	G	1	1.05	0.952381	CRTR forward
forward	tumor	1225	GRTR	C	1	1	1	GRTR forward
forward	tumor	1225	GRTR	G	15	12.05	1.24481	GRTR forward
forward	tumor	1225	other	C	3	2.8	1.07143	other forward
forward	tumor	1225	other	G	12	5	2.4	other forward
forward	tumor	1275	CRTR	C	5	3.05	1.63934	CRTR forward
forward	tumor	1275	CRTR	G	1	1.05	0.952381	CRTR forward
forward	tumor	1275	GRTR	C	1	1	1	GRTR forward
forward	tumor	1275	GRTR	G	17	12.05	1.41079	GRTR forward
forward	tumor	1275	other	C	8	2.8	2.85714	other forward
forward	tumor	1275	other	G	4	5	0.8	other forward
forward	tumor	1325	CRTR	C	4	3.05	1.31148	CRTR forward
forward	tumor	1325	CRTR	G	1	1.05	0.952381	CRTR forward
forward	tumor	1325	GRTR	C	1	1	1	GRTR forward
forward	tumor	1325	GRTR	G	10	12.05	0.829876	GRTR forward
forward	tumor	1325	other	C	7	2.8	2.5	other forward
forward	tumor	1325	other	G	6	5	1.2	other forward
forward	tumor	1375	CRTR	C	4	3.05	1.31148	CRTR forward
forward	tumor	1375	CRTR	G	1	1.05	0.952381	CRTR forward
forward	tumor	1375	GRTR	C	1	1	1	GRTR forward
forward	tumor	1375	GRTR	G	12	12.05	0.995851	GRTR forward
forward	tumor	1375	other	C	7	2.8	2.5	other forward
forward	tumor	1375	other	G	13	5	2.6	other forward
forward	tumor	1425	CRTR	C	4	3.05	1.31148	CRTR forward
forward	tumor	1425	CRTR	G	1	1.05	0.952381	CRTR forward
forward	tumor	1425	GRTR	C	1	1	1	GRTR forward
forward	tumor	1425	GRTR	G	2	12.05	0.165975	GRTR forward
forward	tumor	1425	other	C	5	2.8	1.78571	other forward
forward	tumor	1425	other	G	6	5	1.2	other forward
forward	tumor	1475	CRTR	C	1	3.05	0.327869	CRTR forward
forward	tumor	1475	CRTR	G	1	1.05	0.952381	CRTR forward
forward	tumor	1475	GRTR	C	1	1	1	GRTR forward
forward	tumor	1475	GRTR	G	18	12.05	1.49378	GRTR forward
forward	tumor	1475	other	C	1	2.8	0.357143	other forward
forward	tumor	1475	other	G	7	5	1.4	other forward
forward	tumor	1525	CRTR	C	2	3.05	0.655738	CRTR forward
forward	tumor	1525	CRTR	G	1	1.05	0.952381	CRTR forward
forward	tumor	1525	GRTR	C	1	1	1	GRTR forward
forward	tumor	1525	GRTR	G	11	12.05	0.912863	GRTR forward
forward	tumor	1525	other	C	1	2.8	0.357143	other forward
forward	tumor	1525	other	G	4	5	0.8	other forward
forward	tumor	1575	CRTR	C	2	3.05	0.655738	CRTR forward
forward	tumor	1575	CRTR	G	1	1.05	0.952381	CRTR forward
forward	tumor	1575	GRTR	C	1	1	1	GRTR forward
forward	tumor	1575	GRTR	G	11	12.05	0.912863	GRTR forward
forward	tumor	1575	other	C	1	2.8	0.357143	other forward
forward	tumor	1575	other	G	3	5	0.6	other forward
forward	tumor	1625	CRTR	C	1	3.05	0.327869	CRTR forward
forward	tumor	1625	CRTR	G	1	1.05	0.952381	CRTR forward
forward	tumor	1625	GRTR	C	1	1	1	GRTR forward
forward	tumor	1625	GRTR	G	7	12.05	0.580913	GRTR forward
forward	tumor	1625	other	C	1	2.8	0.357143	other forward
forward	tumor	1625	other	G	2	5	0.4	other forward
forward	tumor	1675	CRTR	C	1	3.05	0.327869	CRTR forward
forward	tumor	1675	CRTR	G	1	1.05	0.952381	CRTR forward
forward	tumor	1675	GRTR	C	1	1	1	GRTR forward
forward	tumor	1675	GRTR	G	16	12.05	1.3278	GRTR forward
forward	tumor	1675	other	C	2	2.8	0.714286	other forward
forward	tumor	1675	other	G	5	5	1	other forward
forward	tumor	1725	CRTR	C	1	3.05	0.327869	CRTR forward
forward	tumor	1725	CRTR	G	1	1.05	0.952381	CRTR forward
forward	tumor	1725	GRTR	C	1	1	1	GRTR forward
forward	tumor	1725	GRTR	G	10	12.05	0.829876	GRTR forward
forward	tumor	1725	other	C	1	2.8	0.357143	other forward
forward	tumor	1725	other	G	3	5	0.6	other forward
forward	tumor	1775	CRTR	C	1	3.05	0.327869	CRTR forward
forward	tumor	1775	CRTR	G	1	1.05	0.952381	CRTR forward
forward	tumor	1775	GRTR	C	1	1	1	GRTR forward
forward	tumor	1775	GRTR	G	11	12.05	0.912863	GRTR forward
forward	tumor	1775	other	C	1	2.8	0.357143	other forward
forward	tumor	1775	other	G	2	5	0.4	other forward
forward	tumor	1825	CRTR	C	1	3.05	0.327869	CRTR forward
forward	tumor	1825	CRTR	G	1	1.05	0.952381	CRTR forward
forward	tumor	1825	GRTR	C	1	1	1	GRTR forward
forward	tumor	1825	GRTR	G	11	12.05	0.912863	GRTR forward
forward	tumor	1825	other	C	1	2.8	0.357143	other forward
forward	tumor	1825	other	G	2	5	0.4	other forward
forward	tumor	1875	CRTR	C	2	3.05	0.655738	CRTR forward
forward	tumor	1875	CRTR	G	1	1.05	0.952381	CRTR forward
forward	tumor	1875	GRTR	C	1	1	1	GRTR forward
forward	tumor	1875	GRTR	G	12	12.05	0.995851	GRTR forward
forward	tumor	1875	other	C	1	2.8	0.357143	other forward
forward	tumor	1875	other	G	1	5	0.2	other forward
forward	tumor	1925	CRTR	C	1	3.05	0.327869	CRTR forward
forward	tumor	1925	CRTR	G	1	1.05	0.952381	CRTR forward
forward	tumor	1925	GRTR	C	1	1	1	GRTR forward
forward	tumor	1925	GRTR	G	7	12.05	0.580913	GRTR forward
forward	tumor	1925	other	C	1	2.8	0.357143	other forward
forward	tumor	1925	other	G	1	5	0.2	other forward
forward	tumor	1975	CRTR	C	1	3.05	0.327869	CRTR forward
forward	tumor	1975	CRTR	G	1	1.05	0.952381	CRTR forward
forward	tumor	1975	GRTR	C	1	1	1	GRTR forward
forward	tumor	1975	GRTR	G	1	12.05	0.0829876	GRTR forward
forward	tumor	1975	other	C	1	2.8	0.357143	other forward
forward	tumor	1975	other	G	1	5	0.2	other forward
forward	tumor	2025	CRTR	C	1	3.05	0.327869	CRTR forward
forward	tumor	2025	CRTR	G	1	1.05	0.952381	CRTR forward
forward	tumor	2025	GRTR	C	1	1	1	GRTR forward
forward	tumor	2025	GRTR	G	1	12.05	0.0829876	GRTR forward
forward	tumor	2025	other	C	1	2.8	0.357143	other forward
forward	tumor	2025	other	G	1	5	0.2	other forward
forward	tumor	2075	CRTR	C	2	3.05	0.655738	CRTR forward
forward	tumor	2075	CRTR	G	1	1.05	0.952381	CRTR forward
forward	tumor	2075	GRTR	C	1	1	1	GRTR forward
forward	tumor	2075	GRTR	G	1	12.05	0.0829876	GRTR forward
forward	tumor	2075	other	C	1	2.8	0.357143	other forward
forward	tumor	2075	other	G	1	5	0.2	other forward
forward	tumor	2125	CRTR	C	1	3.05	0.327869	CRTR forward
forward	tumor	2125	CRTR	G	1	1.05	0.952381	CRTR forward
forward	tumor	2125	GRTR	C	1	1	1	GRTR forward
forward	tumor	2125	GRTR	G	1	12.05	0.0829876	GRTR forward
forward	tumor	2125	other	C	1	2.8	0.357143	other forward
forward	tumor	2125	other	G	1	5	0.2	other forward
forward	tumor	2175	CRTR	C	1	3.05	0.327869	CRTR forward
forward	tumor	2175	CRTR	G	1	1.05	0.952381	CRTR forward
forward	tumor	2175	GRTR	C	1	1	1	GRTR forward
forward	tumor	2175	GRTR	G	4	12.05	0.33195	GRTR forward
forward	tumor	2175	other	C	1	2.8	0.357143	other forward
forward	tumor	2175	other	G	1	5	0.2	other forward
forward	tumor	2225	CRTR	C	2	3.05	0.655738	CRTR forward
forward	tumor	2225	CRTR	G	1	1.05	0.952381	CRTR forward
forward	tumor	2225	GRTR	C	1	1	1	GRTR forward
forward	tumor	2225	GRTR	G	5	12.05	0.414938	GRTR forward
forward	tumor	2225	other	C	1	2.8	0.357143	other forward
forward	tumor	2225	other	G	2	5	0.4	other forward
forward	tumor	2275	CRTR	C	2	3.05	0.655738	CRTR forward
forward	tumor	2275	CRTR	G	1	1.05	0.952381	CRTR forward
forward	tumor	2275	GRTR	C	1	1	1	GRTR forward
forward	tumor	2275	GRTR	G	3	12.05	0.248963	GRTR forward
forward	tumor	2275	other	C	1	2.8	0.357143	other forward
forward	tumor	2275	other	G	3	5	0.6	other forward
forward	tumor	2325	CRTR	C	8	3.05	2.62295	CRTR forward
forward	tumor	2325	CRTR	G	1	1.05	0.952381	CRTR forward
forward	tumor	2325	GRTR	C	1	1	1	GRTR forward
forward	tumor	2325	GRTR	G	2	12.05	0.165975	GRTR forward
forward	tumor	2325	other	C	1	2.8	0.357143	other forward
forward	tumor	2325	other	G	2	5	0.4	other forward
forward	tumor	2375	CRTR	C	7	3.05	2.29508	CRTR forward
forward	tumor	2375	CRTR	G	1	1.05	0.952381	CRTR forward
forward	tumor	2375	GRTR	C	1	1	1	GRTR forward
forward	tumor	2375	GRTR	G	3	12.05	0.248963	GRTR forward
forward	tumor	2375	other	C	1	2.8	0.357143	other forward
forward	tumor	2375	other	G	7	5	1.4	other forward
forward	tumor	2425	CRTR	C	7	3.05	2.29508	CRTR forward
forward	tumor	2425	CRTR	G	1	1.05	0.952381	CRTR forward
forward	tumor	2425	GRTR	C	1	1	1	GRTR forward
forward	tumor	2425	GRTR	G	1	12.05	0.0829876	GRTR forward
forward	tumor	2425	other	C	1	2.8	0.357143	other forward
forward	tumor	2425	other	G	23	5	4.6	other forward
forward	tumor	2475	CRTR	C	3	3.05	0.983607	CRTR forward
forward	tumor	2475	CRTR	G	1	1.05	0.952381	CRTR forward
forward	tumor	2475	GRTR	C	1	1	1	GRTR forward
forward	tumor	2475	GRTR	G	4	12.05	0.33195	GRTR forward
forward	tumor	2475	other	C	1	2.8	0.357143	other forward
forward	tumor	2475	other	G	1	5	0.2	other forward
forward	tumor	2525	CRTR	C	1	3.05	0.327869	CRTR forward
forward	tumor	2525	CRTR	G	1	1.05	0.952381	CRTR forward
forward	tumor	2525	GRTR	C	1	1	1	GRTR forward
forward	tumor	2525	GRTR	G	6	12.05	0.497925	GRTR forward
forward	tumor	2525	other	C	1	2.8	0.357143	other forward
forward	tumor	2525	other	G	1	5	0.2	other forward
forward	tumor	2575	CRTR	C	1	3.05	0.327869	CRTR forward
forward	tumor	2575	CRTR	G	1	1.05	0.952381	CRTR forward
forward	tumor	2575	GRTR	C	1	1	1	GRTR forward
forward	tumor	2575	GRTR	G	4	12.05	0.33195	GRTR forward
forward	tumor	2575	other	C	1	2.8	0.357143	other forward
forward	tumor	2575	other	G	1	5	0.2	other forward
forward	tumor	2625	CRTR	C	1	3.05	0.327869	CRTR forward
forward	tumor	2625	CRTR	G	1	1.05	0.952381	CRTR forward
forward	tumor	2625	GRTR	C	1	1	1	GRTR forward
forward	tumor	2625	GRTR	G	5	12.05	0.414938	GRTR forward
forward	tumor	2625	other	C	1	2.8	0.357143	other forward
forward	tumor	2625	other	G	6	5	1.2	other forward
forward	tumor	2675	CRTR	C	3	3.05	0.983607	CRTR forward
forward	tumor	2675	CRTR	G	1	1.05	0.952381	CRTR forward
forward	tumor	2675	GRTR	C	1	1	1	GRTR forward
forward	tumor	2675	GRTR	G	1	12.05	0.0829876	GRTR forward
forward	tumor	2675	other	C	1	2.8	0.357143	other forward
forward	tumor	2675	other	G	7	5	1.4	other forward
forward	tumor	2725	CRTR	C	1	3.05	0.327869	CRTR forward
forward	tumor	2725	CRTR	G	1	1.05	0.952381	CRTR forward
forward	tumor	2725	GRTR	C	1	1	1	GRTR forward
forward	tumor	2725	GRTR	G	1	12.05	0.0829876	GRTR forward
forward	tumor	2725	other	C	1	2.8	0.357143	other forward
forward	tumor	2725	other	G	2	5	0.4	other forward
forward	tumor	2825	CRTR	C	1	3.05	0.327869	CRTR forward
forward	tumor	2825	CRTR	G	1	1.05	0.952381	CRTR forward
forward	tumor	2825	GRTR	C	1	1	1	GRTR forward
forward	tumor	2825	GRTR	G	1	12.05	0.0829876	GRTR forward
forward	tumor	2825	other	C	2	2.8	0.714286	other forward
forward	tumor	2825	other	G	2	5	0.4	other forward
forward	tumor	2875	CRTR	C	1	3.05	0.327869	CRTR forward
forward	tumor	2875	CRTR	G	1	1.05	0.952381	CRTR forward
forward	tumor	2875	GRTR	C	1	1	1	GRTR forward
forward	tumor	2875	GRTR	G	2	12.05	0.165975	GRTR forward
forward	tumor	2875	other	C	6	2.8	2.14286	other forward
forward	tumor	2875	other	G	1	5	0.2	other forward
forward	tumor	2925	CRTR	C	1	3.05	0.327869	CRTR forward
forward	tumor	2925	CRTR	G	1	1.05	0.952381	CRTR forward
forward	tumor	2925	GRTR	C	1	1	1	GRTR forward
forward	tumor	2925	GRTR	G	3	12.05	0.248963	GRTR forward
forward	tumor	2925	other	C	4	2.8	1.42857	other forward
forward	tumor	2925	other	G	1	5	0.2	other forward
forward	tumor	2975	CRTR	C	1	3.05	0.327869	CRTR forward
forward	tumor	2975	CRTR	G	1	1.05	0.952381	CRTR forward
forward	tumor	2975	GRTR	C	1	1	1	GRTR forward
forward	tumor	2975	GRTR	G	1	12.05	0.0829876	GRTR forward
forward	tumor	2975	other	C	3	2.8	1.07143	other forward
forward	tumor	2975	other	G	1	5	0.2	other forward
forward	tumor	3025	CRTR	C	1	3.05	0.327869	CRTR forward
forward	tumor	3025	CRTR	G	1	1.05	0.952381	CRTR forward
forward	tumor	3025	GRTR	C	1	1	1	GRTR forward
forward	tumor	3025	GRTR	G	9	12.05	0.746888	GRTR forward
forward	tumor	3025	other	C	3	2.8	1.07143	other forward
forward	tumor	3025	other	G	1	5	0.2	other forward
forward	tumor	3075	CRTR	C	1	3.05	0.327869	CRTR forward
forward	tumor	3075	CRTR	G	1	1.05	0.952381	CRTR forward
forward	tumor	3075	GRTR	C	1	1	1	GRTR forward
forward	tumor	3075	GRTR	G	9	12.05	0.746888	GRTR forward
forward	tumor	3075	other	C	2	2.8	0.714286	other forward
forward	tumor	3075	other	G	1	5	0.2	other forward
forward	tumor	3125	CRTR	C	1	3.05	0.327869	CRTR forward
forward	tumor	3125	CRTR	G	1	1.05	0.952381	CRTR forward
forward	tumor	3125	GRTR	C	1	1	1	GRTR forward
forward	tumor	3125	GRTR	G	2	12.05	0.165975	GRTR forward
forward	tumor	3125	other	C	1	2.8	0.357143	other forward
forward	tumor	3125	other	G	1	5	0.2	other forward
forward	tumor	3175	CRTR	C	1	3.05	0.327869	CRTR forward
forward	tumor	3175	CRTR	G	1	1.05	0.952381	CRTR forward
forward	tumor	3175	GRTR	C	1	1	1	GRTR forward
forward	tumor	3175	GRTR	G	2	12.05	0.165975	GRTR forward
forward	tumor	3175	other	C	1	2.8	0.357143	other forward
forward	tumor	3175	other	G	1	5	0.2	other forward
forward	tumor	3275	CRTR	C	1	3.05	0.327869	CRTR forward
forward	tumor	3275	CRTR	G	1	1.05	0.952381	CRTR forward
forward	tumor	3275	GRTR	C	1	1	1	GRTR forward
forward	tumor	3275	GRTR	G	1	12.05	0.0829876	GRTR forward
forward	tumor	3275	other	C	1	2.8	0.357143	other forward
forward	tumor	3275	other	G	1	5	0.2	other forward
forward	tumor	3325	CRTR	C	1	3.05	0.327869	CRTR forward
forward	tumor	3325	CRTR	G	1	1.05	0.952381	CRTR forward
forward	tumor	3325	GRTR	C	1	1	1	GRTR forward
forward	tumor	3325	GRTR	G	1	12.05	0.0829876	GRTR forward
forward	tumor	3325	other	C	1	2.8	0.357143	other forward
forward	tumor	3325	other	G	1	5	0.2	other forward
forward	tumor	3425	CRTR	C	1	3.05	0.327869	CRTR forward
forward	tumor	3425	CRTR	G	1	1.05	0.952381	CRTR forward
forward	tumor	3425	GRTR	C	1	1	1	GRTR forward
forward	tumor	3425	GRTR	G	1	12.05	0.0829876	GRTR forward
forward	tumor	3425	other	C	1	2.8	0.357143	other forward
forward	tumor	3425	other	G	1	5	0.2	other forward
forward	tumor	3525	CRTR	C	2	3.05	0.655738	CRTR forward
forward	tumor	3525	CRTR	G	1	1.05	0.952381	CRTR forward
forward	tumor	3525	GRTR	C	1	1	1	GRTR forward
forward	tumor	3525	GRTR	G	1	12.05	0.0829876	GRTR forward
forward	tumor	3525	other	C	1	2.8	0.357143	other forward
forward	tumor	3525	other	G	5	5	1	other forward
forward	tumor	3575	CRTR	C	3	3.05	0.983607	CRTR forward
forward	tumor	3575	CRTR	G	1	1.05	0.952381	CRTR forward
forward	tumor	3575	GRTR	C	1	1	1	GRTR forward
forward	tumor	3575	GRTR	G	1	12.05	0.0829876	GRTR forward
forward	tumor	3575	other	C	1	2.8	0.357143	other forward
forward	tumor	3575	other	G	4	5	0.8	other forward
forward	tumor	3625	CRTR	C	5	3.05	1.63934	CRTR forward
forward	tumor	3625	CRTR	G	1	1.05	0.952381	CRTR forward
forward	tumor	3625	GRTR	C	1	1	1	GRTR forward
forward	tumor	3625	GRTR	G	1	12.05	0.0829876	GRTR forward
forward	tumor	3625	other	C	1	2.8	0.357143	other forward
forward	tumor	3625	other	G	2	5	0.4	other forward
forward	tumor	3675	CRTR	C	1	3.05	0.327869	CRTR forward
forward	tumor	3675	CRTR	G	1	1.05	0.952381	CRTR forward
forward	tumor	3675	GRTR	C	1	1	1	GRTR forward
forward	tumor	3675	GRTR	G	1	12.05	0.0829876	GRTR forward
forward	tumor	3675	other	C	1	2.8	0.357143	other forward
forward	tumor	3675	other	G	1	5	0.2	other forward
forward	tumor	3725	CRTR	C	1	3.05	0.327869	CRTR forward
forward	tumor	3725	CRTR	G	1	1.05	0.952381	CRTR forward
forward	tumor	3725	GRTR	C	1	1	1	GRTR forward
forward	tumor	3725	GRTR	G	1	12.05	0.0829876	GRTR forward
forward	tumor	3725	other	C	1	2.8	0.357143	other forward
forward	tumor	3725	other	G	1	5	0.2	other forward
forward	tumor	3775	CRTR	C	3	3.05	0.983607	CRTR forward
forward	tumor	3775	CRTR	G	1	1.05	0.952381	CRTR forward
forward	tumor	3775	GRTR	C	1	1	1	GRTR forward
forward	tumor	3775	GRTR	G	1	12.05	0.0829876	GRTR forward
forward	tumor	3775	other	C	1	2.8	0.357143	other forward
forward	tumor	3775	other	G	6	5	1.2	other forward
forward	tumor	3825	CRTR	C	2	3.05	0.655738	CRTR forward
forward	tumor	3825	CRTR	G	1	1.05	0.952381	CRTR forward
forward	tumor	3825	GRTR	C	1	1	1	GRTR forward
forward	tumor	3825	GRTR	G	1	12.05	0.0829876	GRTR forward
forward	tumor	3825	other	C	1	2.8	0.357143	other forward
forward	tumor	3825	other	G	2	5	0.4	other forward
forward	tumor	3875	CRTR	C	3	3.05	0.983607	CRTR forward
forward	tumor	3875	CRTR	G	1	1.05	0.952381	CRTR forward
forward	tumor	3875	GRTR	C	1	1	1	GRTR forward
forward	tumor	3875	GRTR	G	1	12.05	0.0829876	GRTR forward
forward	tumor	3875	other	C	1	2.8	0.357143	other forward
forward	tumor	3875	other	G	2	5	0.4	other forward
forward	tumor	3925	CRTR	C	1	3.05	0.327869	CRTR forward
forward	tumor	3925	CRTR	G	1	1.05	0.952381	CRTR forward
forward	tumor	3925	GRTR	C	1	1	1	GRTR forward
forward	tumor	3925	GRTR	G	1	12.05	0.0829876	GRTR forward
forward	tumor	3925	other	C	1	2.8	0.357143	other forward
forward	tumor	3925	other	G	3	5	0.6	other forward
forward	tumor	3975	CRTR	C	1	3.05	0.327869	CRTR forward
forward	tumor	3975	CRTR	G	1	1.05	0.952381	CRTR forward
forward	tumor	3975	GRTR	C	1	1	1	GRTR forward
forward	tumor	3975	GRTR	G	1	12.05	0.0829876	GRTR forward
forward	tumor	3975	other	C	1	2.8	0.357143	other forward
forward	tumor	3975	other	G	1	5	0.2	other forward
forward	tumor	4025	CRTR	C	1	3.05	0.327869	CRTR forward
forward	tumor	4025	CRTR	G	1	1.05	0.952381	CRTR forward
forward	tumor	4025	GRTR	C	1	1	1	GRTR forward
forward	tumor	4025	GRTR	G	1	12.05	0.0829876	GRTR forward
forward	tumor	4025	other	C	1	2.8	0.357143	other forward
forward	tumor	4025	other	G	1	5	0.2	other forward
forward	tumor	4075	CRTR	C	1	3.05	0.327869	CRTR forward
forward	tumor	4075	CRTR	G	1	1.05	0.952381	CRTR forward
forward	tumor	4075	GRTR	C	1	1	1	GRTR forward
forward	tumor	4075	GRTR	G	1	12.05	0.0829876	GRTR forward
forward	tumor	4075	other	C	3	2.8	1.07143	other forward
forward	tumor	4075	other	G	1	5	0.2	other forward
forward	tumor	4125	CRTR	C	1	3.05	0.327869	CRTR forward
forward	tumor	4125	CRTR	G	1	1.05	0.952381	CRTR forward
forward	tumor	4125	GRTR	C	1	1	1	GRTR forward
forward	tumor	4125	GRTR	G	1	12.05	0.0829876	GRTR forward
forward	tumor	4125	other	C	1	2.8	0.357143	other forward
forward	tumor	4125	other	G	1	5	0.2	other forward
forward	tumor	4175	CRTR	C	1	3.05	0.327869	CRTR forward
forward	tumor	4175	CRTR	G	1	1.05	0.952381	CRTR forward
forward	tumor	4175	GRTR	C	1	1	1	GRTR forward
forward	tumor	4175	GRTR	G	1	12.05	0.0829876	GRTR forward
forward	tumor	4175	other	C	1	2.8	0.357143	other forward
forward	tumor	4175	other	G	1	5	0.2	other forward
forward	tumor	4225	CRTR	C	1	3.05	0.327869	CRTR forward
forward	tumor	4225	CRTR	G	1	1.05	0.952381	CRTR forward
forward	tumor	4225	GRTR	C	1	1	1	GRTR forward
forward	tumor	4225	GRTR	G	1	12.05	0.0829876	GRTR forward
forward	tumor	4225	other	C	1	2.8	0.357143	other forward
forward	tumor	4225	other	G	1	5	0.2	other forward
forward	tumor	4275	CRTR	C	1	3.05	0.327869	CRTR forward
forward	tumor	4275	CRTR	G	1	1.05	0.952381	CRTR forward
forward	tumor	4275	GRTR	C	1	1	1	GRTR forward
forward	tumor	4275	GRTR	G	1	12.05	0.0829876	GRTR forward
forward	tumor	4275	other	C	1	2.8	0.357143	other forward
forward	tumor	4275	other	G	1	5	0.2	other forward
forward	tumor	4325	CRTR	C	1	3.05	0.327869	CRTR forward
forward	tumor	4325	CRTR	G	1	1.05	0.952381	CRTR forward
forward	tumor	4325	GRTR	C	1	1	1	GRTR forward
forward	tumor	4325	GRTR	G	2	12.05	0.165975	GRTR forward
forward	tumor	4325	other	C	1	2.8	0.357143	other forward
forward	tumor	4325	other	G	1	5	0.2	other forward
forward	tumor	4375	CRTR	C	1	3.05	0.327869	CRTR forward
forward	tumor	4375	CRTR	G	1	1.05	0.952381	CRTR forward
forward	tumor	4375	GRTR	C	1	1	1	GRTR forward
forward	tumor	4375	GRTR	G	2	12.05	0.165975	GRTR forward
forward	tumor	4375	other	C	1	2.8	0.357143	other forward
forward	tumor	4375	other	G	1	5	0.2	other forward
forward	tumor	4425	CRTR	C	1	3.05	0.327869	CRTR forward
forward	tumor	4425	CRTR	G	1	1.05	0.952381	CRTR forward
forward	tumor	4425	GRTR	C	1	1	1	GRTR forward
forward	tumor	4425	GRTR	G	4	12.05	0.33195	GRTR forward
forward	tumor	4425	other	C	1	2.8	0.357143	other forward
forward	tumor	4425	other	G	1	5	0.2	other forward
forward	tumor	4475	CRTR	C	1	3.05	0.327869	CRTR forward
forward	tumor	4475	CRTR	G	1	1.05	0.952381	CRTR forward
forward	tumor	4475	GRTR	C	1	1	1	GRTR forward
forward	tumor	4475	GRTR	G	4	12.05	0.33195	GRTR forward
forward	tumor	4475	other	C	1	2.8	0.357143	other forward
forward	tumor	4475	other	G	1	5	0.2	other forward
forward	tumor	4525	CRTR	C	1	3.05	0.327869	CRTR forward
forward	tumor	4525	CRTR	G	1	1.05	0.952381	CRTR forward
forward	tumor	4525	GRTR	C	1	1	1	GRTR forward
forward	tumor	4525	GRTR	G	6	12.05	0.497925	GRTR forward
forward	tumor	4525	other	C	1	2.8	0.357143	other forward
forward	tumor	4525	other	G	1	5	0.2	other forward
forward	tumor	4575	CRTR	C	1	3.05	0.327869	CRTR forward
forward	tumor	4575	CRTR	G	1	1.05	0.952381	CRTR forward
forward	tumor	4575	GRTR	C	1	1	1	GRTR forward
forward	tumor	4575	GRTR	G	2	12.05	0.165975	GRTR forward
forward	tumor	4575	other	C	1	2.8	0.357143	other forward
forward	tumor	4575	other	G	1	5	0.2	other forward
forward	tumor	4625	CRTR	C	1	3.05	0.327869	CRTR forward
forward	tumor	4625	CRTR	G	1	1.05	0.952381	CRTR forward
forward	tumor	4625	GRTR	C	1	1	1	GRTR forward
forward	tumor	4625	GRTR	G	4	12.05	0.33195	GRTR forward
forward	tumor	4625	other	C	1	2.8	0.357143	other forward
forward	tumor	4625	other	G	1	5	0.2	other forward
forward	tumor	4675	CRTR	C	1	3.05	0.327869	CRTR forward
forward	tumor	4675	CRTR	G	1	1.05	0.952381	CRTR forward
forward	tumor	4675	GRTR	C	1	1	1	GRTR forward
forward	tumor	4675	GRTR	G	2	12.05	0.165975	GRTR forward
forward	tumor	4675	other	C	1	2.8	0.357143	other forward
forward	tumor	4675	other	G	1	5	0.2	other forward
forward	tumor	4725	CRTR	C	1	3.05	0.327869	CRTR forward
forward	tumor	4725	CRTR	G	1	1.05	0.952381	CRTR forward
forward	tumor	4725	GRTR	C	1	1	1	GRTR forward
forward	tumor	4725	GRTR	G	1	12.05	0.0829876	GRTR forward
forward	tumor	4725	other	C	1	2.8	0.357143	other forward
forward	tumor	4725	other	G	1	5	0.2	other forward
forward	tumor	4775	CRTR	C	1	3.05	0.327869	CRTR forward
forward	tumor	4775	CRTR	G	1	1.05	0.952381	CRTR forward
forward	tumor	4775	GRTR	C	1	1	1	GRTR forward
forward	tumor	4775	GRTR	G	1	12.05	0.0829876	GRTR forward
forward	tumor	4775	other	C	1	2.8	0.357143	other forward
forward	tumor	4775	other	G	1	5	0.2	other forward
forward	tumor	4825	CRTR	C	1	3.05	0.327869	CRTR forward
forward	tumor	4825	CRTR	G	1	1.05	0.952381	CRTR forward
forward	tumor	4825	GRTR	C	1	1	1	GRTR forward
forward	tumor	4825	GRTR	G	1	12.05	0.0829876	GRTR forward
forward	tumor	4825	other	C	1	2.8	0.357143	other forward
forward	tumor	4825	other	G	1	5	0.2	other forward
forward	tumor	4875	CRTR	C	1	3.05	0.327869	CRTR forward
forward	tumor	4875	CRTR	G	1	1.05	0.952381	CRTR forward
forward	tumor	4875	GRTR	C	1	1	1	GRTR forward
forward	tumor	4875	GRTR	G	1	12.05	0.0829876	GRTR forward
forward	tumor	4875	other	C	1	2.8	0.357143	other forward
forward	tumor	4875	other	G	1	5	0.2	other forward
forward	tumor	4925	CRTR	C	1	3.05	0.327869	CRTR forward
forward	tumor	4925	CRTR	G	1	1.05	0.952381	CRTR forward
forward	tumor	4925	GRTR	C	1	1	1	GRTR forward
forward	tumor	4925	GRTR	G	1	12.05	0.0829876	GRTR forward
forward	tumor	4925	other	C	1	2.8	0.357143	other forward
forward	tumor	4925	other	G	1	5	0.2	other forward
forward	tumor	4975	CRTR	C	1	3.05	0.327869	CRTR forward
forward	tumor	4975	CRTR	G	1	1.05	0.952381	CRTR forward
forward	tumor	4975	GRTR	C	1	1	1	GRTR forward
forward	tumor	4975	GRTR	G	1	12.05	0.0829876	GRTR forward
forward	tumor	4975	other	C	1	2.8	0.357143	other forward
forward	tumor	4975	other	G	1	5	0.2	other forward
reverse	tumor	-4975	CRTR	C	1	1	1	CRTR reverse
reverse	tumor	-4975	CRTR	G	1	1	1	CRTR reverse
reverse	tumor	-4975	GRTR	C	1	1	1	GRTR reverse
reverse	tumor	-4975	GRTR	G	1	1	1	GRTR reverse
reverse	tumor	-4975	other	C	1	1	1	other reverse
reverse	tumor	-4975	other	G	1	1.65	0.606061	other reverse
reverse	tumor	-4925	CRTR	C	1	1	1	CRTR reverse
reverse	tumor	-4925	CRTR	G	1	1	1	CRTR reverse
reverse	tumor	-4925	GRTR	C	1	1	1	GRTR reverse
reverse	tumor	-4925	GRTR	G	1	1	1	GRTR reverse
reverse	tumor	-4925	other	C	2	1	2	other reverse
reverse	tumor	-4925	other	G	1	1.65	0.606061	other reverse
reverse	tumor	-4875	CRTR	C	1	1	1	CRTR reverse
reverse	tumor	-4875	CRTR	G	1	1	1	CRTR reverse
reverse	tumor	-4875	GRTR	C	1	1	1	GRTR reverse
reverse	tumor	-4875	GRTR	G	1	1	1	GRTR reverse
reverse	tumor	-4875	other	C	1	1	1	other reverse
reverse	tumor	-4875	other	G	1	1.65	0.606061	other reverse
reverse	tumor	-4825	CRTR	C	1	1	1	CRTR reverse
reverse	tumor	-4825	CRTR	G	1	1	1	CRTR reverse
reverse	tumor	-4825	GRTR	C	1	1	1	GRTR reverse
reverse	tumor	-4825	GRTR	G	1	1	1	GRTR reverse
reverse	tumor	-4825	other	C	1	1	1	other reverse
reverse	tumor	-4825	other	G	1	1.65	0.606061	other reverse
reverse	tumor	-4775	CRTR	C	1	1	1	CRTR reverse
reverse	tumor	-4775	CRTR	G	1	1	1	CRTR reverse
reverse	tumor	-4775	GRTR	C	1	1	1	GRTR reverse
reverse	tumor	-4775	GRTR	G	1	1	1	GRTR reverse
reverse	tumor	-4775	other	C	1	1	1	other reverse
reverse	tumor	-4775	other	G	1	1.65	0.606061	other reverse
reverse	tumor	-4725	CRTR	C	1	1	1	CRTR reverse
reverse	tumor	-4725	CRTR	G	1	1	1	CRTR reverse
reverse	tumor	-4725	GRTR	C	1	1	1	GRTR reverse
reverse	tumor	-4725	GRTR	G	1	1	1	GRTR reverse
reverse	tumor	-4725	other	C	1	1	1	other reverse
reverse	tumor	-4725	other	G	1	1.65	0.606061	other reverse
reverse	tumor	-4675	CRTR	C	1	1	1	CRTR reverse
reverse	tumor	-4675	CRTR	G	1	1	1	CRTR reverse
reverse	tumor	-4675	GRTR	C	1	1	1	GRTR reverse
reverse	tumor	-4675	GRTR	G	1	1	1	GRTR reverse
reverse	tumor	-4675	other	C	1	1	1	other reverse
reverse	tumor	-4675	other	G	1	1.65	0.606061	other reverse
reverse	tumor	-4625	CRTR	C	1	1	1	CRTR reverse
reverse	tumor	-4625	CRTR	G	1	1	1	CRTR reverse
reverse	tumor	-4625	GRTR	C	1	1	1	GRTR reverse
reverse	tumor	-4625	GRTR	G	1	1	1	GRTR reverse
reverse	tumor	-4625	other	C	1	1	1	other reverse
reverse	tumor	-4625	other	G	1	1.65	0.606061	other reverse
reverse	tumor	-4575	CRTR	C	1	1	1	CRTR reverse
reverse	tumor	-4575	CRTR	G	1	1	1	CRTR reverse
reverse	tumor	-4575	GRTR	C	1	1	1	GRTR reverse
reverse	tumor	-4575	GRTR	G	1	1	1	GRTR reverse
reverse	tumor	-4575	other	C	1	1	1	other reverse
reverse	tumor	-4575	other	G	1	1.65	0.606061	other reverse
reverse	tumor	-4525	CRTR	C	1	1	1	CRTR reverse
reverse	tumor	-4525	CRTR	G	1	1	1	CRTR reverse
reverse	tumor	-4525	GRTR	C	1	1	1	GRTR reverse
reverse	tumor	-4525	GRTR	G	1	1	1	GRTR reverse
reverse	tumor	-4525	other	C	1	1	1	other reverse
reverse	tumor	-4525	other	G	5	1.65	3.0303	other reverse
reverse	tumor	-4475	CRTR	C	1	1	1	CRTR reverse
reverse	tumor	-4475	CRTR	G	1	1	1	CRTR reverse
reverse	tumor	-4475	GRTR	C	1	1	1	GRTR reverse
reverse	tumor	-4475	GRTR	G	1	1	1	GRTR reverse
reverse	tumor	-4475	other	C	1	1	1	other reverse
reverse	tumor	-4475	other	G	6	1.65	3.63636	other reverse
reverse	tumor	-4425	CRTR	C	1	1	1	CRTR reverse
reverse	tumor	-4425	CRTR	G	1	1	1	CRTR reverse
reverse	tumor	-4425	GRTR	C	1	1	1	GRTR reverse
reverse	tumor	-4425	GRTR	G	1	1	1	GRTR reverse
reverse	tumor	-4425	other	C	1	1	1	other reverse
reverse	tumor	-4425	other	G	9	1.65	5.45455	other reverse
reverse	tumor	-4375	CRTR	C	1	1	1	CRTR reverse
reverse	tumor	-4375	CRTR	G	1	1	1	CRTR reverse
reverse	tumor	-4375	GRTR	C	1	1	1	GRTR reverse
reverse	tumor	-4375	GRTR	G	1	1	1	GRTR reverse
reverse	tumor	-4375	other	C	1	1	1	other reverse
reverse	tumor	-4375	other	G	9	1.65	5.45455	other reverse
reverse	tumor	-4325	CRTR	C	1	1	1	CRTR reverse
reverse	tumor	-4325	CRTR	G	1	1	1	CRTR reverse
reverse	tumor	-4325	GRTR	C	1	1	1	GRTR reverse
reverse	tumor	-4325	GRTR	G	1	1	1	GRTR reverse
reverse	tumor	-4325	other	C	1	1	1	other reverse
reverse	tumor	-4325	other	G	4	1.65	2.42424	other reverse
reverse	tumor	-4275	CRTR	C	1	1	1	CRTR reverse
reverse	tumor	-4275	CRTR	G	1	1	1	CRTR reverse
reverse	tumor	-4275	GRTR	C	1	1	1	GRTR reverse
reverse	tumor	-4275	GRTR	G	1	1	1	GRTR reverse
reverse	tumor	-4275	other	C	2	1	2	other reverse
reverse	tumor	-4275	other	G	5	1.65	3.0303	other reverse
reverse	tumor	-4225	CRTR	C	1	1	1	CRTR reverse
reverse	tumor	-4225	CRTR	G	1	1	1	CRTR reverse
reverse	tumor	-4225	GRTR	C	1	1	1	GRTR reverse
reverse	tumor	-4225	GRTR	G	1	1	1	GRTR reverse
reverse	tumor	-4225	other	C	2	1	2	other reverse
reverse	tumor	-4225	other	G	6	1.65	3.63636	other reverse
reverse	tumor	-4175	CRTR	C	1	1	1	CRTR reverse
reverse	tumor	-4175	CRTR	G	1	1	1	CRTR reverse
reverse	tumor	-4175	GRTR	C	1	1	1	GRTR reverse
reverse	tumor	-4175	GRTR	G	1	1	1	GRTR reverse
reverse	tumor	-4175	other	C	1	1	1	other reverse
reverse	tumor	-4175	other	G	2	1.65	1.21212	other reverse
reverse	tumor	-4125	CRTR	C	1	1	1	CRTR reverse
reverse	tumor	-4125	CRTR	G	1	1	1	CRTR reverse
reverse	tumor	-4125	GRTR	C	1	1	1	GRTR reverse
reverse	tumor	-4125	GRTR	G	1	1	1	GRTR reverse
reverse	tumor	-4125	other	C	2	1	2	other reverse
reverse	tumor	-4125	other	G	4	1.65	2.42424	other reverse
reverse	tumor	-4075	CRTR	C	1	1	1	CRTR reverse
reverse	tumor	-4075	CRTR	G	1	1	1	CRTR reverse
reverse	tumor	-4075	GRTR	C	1	1	1	GRTR reverse
reverse	tumor	-4075	GRTR	G	1	1	1	GRTR reverse
reverse	tumor	-4075	other	C	2	1	2	other reverse
reverse	tumor	-4075	other	G	1	1.65	0.606061	other reverse
reverse	tumor	-4025	CRTR	C	1	1	1	CRTR reverse
reverse	tumor	-4025	CRTR	G	1	1	1	CRTR reverse
reverse	tumor	-4025	GRTR	C	1	1	1	GRTR reverse
reverse	tumor	-4025	GRTR	G	1	1	1	GRTR reverse
reverse	tumor	-4025	other	C	1	1	1	other reverse
reverse	tumor	-4025	other	G	2	1.65	1.21212	other reverse
reverse	tumor	-3975	CRTR	C	1	1	1	CRTR reverse
reverse	tumor	-3975	CRTR	G	1	1	1	CRTR reverse
reverse	tumor	-3975	GRTR	C	1	1	1	GRTR reverse
reverse	tumor	-3975	GRTR	G	1	1	1	GRTR reverse
reverse	tumor	-3975	other	C	1	1	1	other reverse
reverse	tumor	-3975	other	G	1	1.65	0.606061	other reverse
reverse	tumor	-3925	CRTR	C	1	1	1	CRTR reverse
reverse	tumor	-3925	CRTR	G	1	1	1	CRTR reverse
reverse	tumor	-3925	GRTR	C	1	1	1	GRTR reverse
reverse	tumor	-3925	GRTR	G	1	1	1	GRTR reverse
reverse	tumor	-3925	other	C	1	1	1	other reverse
reverse	tumor	-3925	other	G	2	1.65	1.21212	other reverse
reverse	tumor	-3875	CRTR	C	1	1	1	CRTR reverse
reverse	tumor	-3875	CRTR	G	1	1	1	CRTR reverse
reverse	tumor	-3875	GRTR	C	1	1	1	GRTR reverse
reverse	tumor	-3875	GRTR	G	1	1	1	GRTR reverse
reverse	tumor	-3875	other	C	1	1	1	other reverse
reverse	tumor	-3875	other	G	1	1.65	0.606061	other reverse
reverse	tumor	-3825	CRTR	C	1	1	1	CRTR reverse
reverse	tumor	-3825	CRTR	G	1	1	1	CRTR reverse
reverse	tumor	-3825	GRTR	C	1	1	1	GRTR reverse
reverse	tumor	-3825	GRTR	G	1	1	1	GRTR reverse
reverse	tumor	-3825	other	C	1	1	1	other reverse
reverse	tumor	-3825	other	G	1	1.65	0.606061	other reverse
reverse	tumor	-3775	CRTR	C	1	1	1	CRTR reverse
reverse	tumor	-3775	CRTR	G	1	1	1	CRTR reverse
reverse	tumor	-3775	GRTR	C	1	1	1	GRTR reverse
reverse	tumor	-3775	GRTR	G	1	1	1	GRTR reverse
reverse	tumor	-3775	other	C	1	1	1	other reverse
reverse	tumor	-3775	other	G	1	1.65	0.606061	other reverse
reverse	tumor	-3725	CRTR	C	1	1	1	CRTR reverse
reverse	tumor	-3725	CRTR	G	1	1	1	CRTR reverse
reverse	tumor	-3725	GRTR	C	1	1	1	GRTR reverse
reverse	tumor	-3725	GRTR	G	1	1	1	GRTR reverse
reverse	tumor	-3725	other	C	1	1	1	other reverse
reverse	tumor	-3725	other	G	1	1.65	0.606061	other reverse
reverse	tumor	-3675	CRTR	C	1	1	1	CRTR reverse
reverse	tumor	-3675	CRTR	G	1	1	1	CRTR reverse
reverse	tumor	-3675	GRTR	C	1	1	1	GRTR reverse
reverse	tumor	-3675	GRTR	G	1	1	1	GRTR reverse
reverse	tumor	-3675	other	C	1	1	1	other reverse
reverse	tumor	-3675	other	G	1	1.65	0.606061	other reverse
reverse	tumor	-3625	CRTR	C	1	1	1	CRTR reverse
reverse	tumor	-3625	CRTR	G	1	1	1	CRTR reverse
reverse	tumor	-3625	GRTR	C	1	1	1	GRTR reverse
reverse	tumor	-3625	GRTR	G	1	1	1	GRTR reverse
reverse	tumor	-3625	other	C	1	1	1	other reverse
reverse	tumor	-3625	other	G	1	1.65	0.606061	other reverse
reverse	tumor	-3575	CRTR	C	1	1	1	CRTR reverse
reverse	tumor	-3575	CRTR	G	1	1	1	CRTR reverse
reverse	tumor	-3575	GRTR	C	1	1	1	GRTR reverse
reverse	tumor	-3575	GRTR	G	1	1	1	GRTR reverse
reverse	tumor	-3575	other	C	1	1	1	other reverse
reverse	tumor	-3575	other	G	1	1.65	0.606061	other reverse
reverse	tumor	-3525	CRTR	C	1	1	1	CRTR reverse
reverse	tumor	-3525	CRTR	G	1	1	1	CRTR reverse
reverse	tumor	-3525	GRTR	C	1	1	1	GRTR reverse
reverse	tumor	-3525	GRTR	G	1	1	1	GRTR reverse
reverse	tumor	-3525	other	C	1	1	1	other reverse
reverse	tumor	-3525	other	G	1	1.65	0.606061	other reverse
reverse	tumor	-3475	CRTR	C	1	1	1	CRTR reverse
reverse	tumor	-3475	CRTR	G	1	1	1	CRTR reverse
reverse	tumor	-3475	GRTR	C	1	1	1	GRTR reverse
reverse	tumor	-3475	GRTR	G	1	1	1	GRTR reverse
reverse	tumor	-3475	other	C	1	1	1	other reverse
reverse	tumor	-3475	other	G	1	1.65	0.606061	other reverse
reverse	tumor	-3425	CRTR	C	1	1	1	CRTR reverse
reverse	tumor	-3425	CRTR	G	1	1	1	CRTR reverse
reverse	tumor	-3425	GRTR	C	1	1	1	GRTR reverse
reverse	tumor	-3425	GRTR	G	1	1	1	GRTR reverse
reverse	tumor	-3425	other	C	1	1	1	other reverse
reverse	tumor	-3425	other	G	1	1.65	0.606061	other reverse
reverse	tumor	-3325	CRTR	C	1	1	1	CRTR reverse
reverse	tumor	-3325	CRTR	G	1	1	1	CRTR reverse
reverse	tumor	-3325	GRTR	C	1	1	1	GRTR reverse
reverse	tumor	-3325	GRTR	G	1	1	1	GRTR reverse
reverse	tumor	-3325	other	C	1	1	1	other reverse
reverse	tumor	-3325	other	G	1	1.65	0.606061	other reverse
reverse	tumor	-3225	CRTR	C	1	1	1	CRTR reverse
reverse	tumor	-3225	CRTR	G	1	1	1	CRTR reverse
reverse	tumor	-3225	GRTR	C	1	1	1	GRTR reverse
reverse	tumor	-3225	GRTR	G	1	1	1	GRTR reverse
reverse	tumor	-3225	other	C	1	1	1	other reverse
reverse	tumor	-3225	other	G	6	1.65	3.63636	other reverse
reverse	tumor	-3175	CRTR	C	1	1	1	CRTR reverse
reverse	tumor	-3175	CRTR	G	1	1	1	CRTR reverse
reverse	tumor	-3175	GRTR	C	1	1	1	GRTR reverse
reverse	tumor	-3175	GRTR	G	1	1	1	GRTR reverse
reverse	tumor	-3175	other	C	1	1	1	other reverse
reverse	tumor	-3175	other	G	6	1.65	3.63636	other reverse
reverse	tumor	-3125	CRTR	C	1	1	1	CRTR reverse
reverse	tumor	-3125	CRTR	G	1	1	1	CRTR reverse
reverse	tumor	-3125	GRTR	C	1	1	1	GRTR reverse
reverse	tumor	-3125	GRTR	G	1	1	1	GRTR reverse
reverse	tumor	-3125	other	C	1	1	1	other reverse
reverse	tumor	-3125	other	G	3	1.65	1.81818	other reverse
reverse	tumor	-3075	CRTR	C	1	1	1	CRTR reverse
reverse	tumor	-3075	CRTR	G	1	1	1	CRTR reverse
reverse	tumor	-3075	GRTR	C	1	1	1	GRTR reverse
reverse	tumor	-3075	GRTR	G	1	1	1	GRTR reverse
reverse	tumor	-3075	other	C	1	1	1	other reverse
reverse	tumor	-3075	other	G	1	1.65	0.606061	other reverse
reverse	tumor	-3025	CRTR	C	1	1	1	CRTR reverse
reverse	tumor	-3025	CRTR	G	1	1	1	CRTR reverse
reverse	tumor	-3025	GRTR	C	1	1	1	GRTR reverse
reverse	tumor	-3025	GRTR	G	1	1	1	GRTR reverse
reverse	tumor	-3025	other	C	1	1	1	other reverse
reverse	tumor	-3025	other	G	1	1.65	0.606061	other reverse
reverse	tumor	-2975	CRTR	C	1	1	1	CRTR reverse
reverse	tumor	-2975	CRTR	G	1	1	1	CRTR reverse
reverse	tumor	-2975	GRTR	C	1	1	1	GRTR reverse
reverse	tumor	-2975	GRTR	G	1	1	1	GRTR reverse
reverse	tumor	-2975	other	C	1	1	1	other reverse
reverse	tumor	-2975	other	G	1	1.65	0.606061	other reverse
reverse	tumor	-2925	CRTR	C	1	1	1	CRTR reverse
reverse	tumor	-2925	CRTR	G	2	1	2	CRTR reverse
reverse	tumor	-2925	GRTR	C	1	1	1	GRTR reverse
reverse	tumor	-2925	GRTR	G	1	1	1	GRTR reverse
reverse	tumor	-2925	other	C	1	1	1	other reverse
reverse	tumor	-2925	other	G	1	1.65	0.606061	other reverse
reverse	tumor	-2875	CRTR	C	1	1	1	CRTR reverse
reverse	tumor	-2875	CRTR	G	1	1	1	CRTR reverse
reverse	tumor	-2875	GRTR	C	1	1	1	GRTR reverse
reverse	tumor	-2875	GRTR	G	1	1	1	GRTR reverse
reverse	tumor	-2875	other	C	1	1	1	other reverse
reverse	tumor	-2875	other	G	1	1.65	0.606061	other reverse
reverse	tumor	-2825	CRTR	C	1	1	1	CRTR reverse
reverse	tumor	-2825	CRTR	G	1	1	1	CRTR reverse
reverse	tumor	-2825	GRTR	C	1	1	1	GRTR reverse
reverse	tumor	-2825	GRTR	G	1	1	1	GRTR reverse
reverse	tumor	-2825	other	C	1	1	1	other reverse
reverse	tumor	-2825	other	G	1	1.65	0.606061	other reverse
reverse	tumor	-2775	CRTR	C	1	1	1	CRTR reverse
reverse	tumor	-2775	CRTR	G	1	1	1	CRTR reverse
reverse	tumor	-2775	GRTR	C	1	1	1	GRTR reverse
reverse	tumor	-2775	GRTR	G	1	1	1	GRTR reverse
reverse	tumor	-2775	other	C	1	1	1	other reverse
reverse	tumor	-2775	other	G	1	1.65	0.606061	other reverse
reverse	tumor	-2725	CRTR	C	1	1	1	CRTR reverse
reverse	tumor	-2725	CRTR	G	1	1	1	CRTR reverse
reverse	tumor	-2725	GRTR	C	1	1	1	GRTR reverse
reverse	tumor	-2725	GRTR	G	1	1	1	GRTR reverse
reverse	tumor	-2725	other	C	1	1	1	other reverse
reverse	tumor	-2725	other	G	1	1.65	0.606061	other reverse
reverse	tumor	-2675	CRTR	C	1	1	1	CRTR reverse
reverse	tumor	-2675	CRTR	G	1	1	1	CRTR reverse
reverse	tumor	-2675	GRTR	C	1	1	1	GRTR reverse
reverse	tumor	-2675	GRTR	G	1	1	1	GRTR reverse
reverse	tumor	-2675	other	C	1	1	1	other reverse
reverse	tumor	-2675	other	G	3	1.65	1.81818	other reverse
reverse	tumor	-2625	CRTR	C	1	1	1	CRTR reverse
reverse	tumor	-2625	CRTR	G	1	1	1	CRTR reverse
reverse	tumor	-2625	GRTR	C	1	1	1	GRTR reverse
reverse	tumor	-2625	GRTR	G	1	1	1	GRTR reverse
reverse	tumor	-2625	other	C	1	1	1	other reverse
reverse	tumor	-2625	other	G	4	1.65	2.42424	other reverse
reverse	tumor	-2575	CRTR	C	1	1	1	CRTR reverse
reverse	tumor	-2575	CRTR	G	1	1	1	CRTR reverse
reverse	tumor	-2575	GRTR	C	1	1	1	GRTR reverse
reverse	tumor	-2575	GRTR	G	1	1	1	GRTR reverse
reverse	tumor	-2575	other	C	1	1	1	other reverse
reverse	tumor	-2575	other	G	3	1.65	1.81818	other reverse
reverse	tumor	-2525	CRTR	C	1	1	1	CRTR reverse
reverse	tumor	-2525	CRTR	G	1	1	1	CRTR reverse
reverse	tumor	-2525	GRTR	C	1	1	1	GRTR reverse
reverse	tumor	-2525	GRTR	G	1	1	1	GRTR reverse
reverse	tumor	-2525	other	C	1	1	1	other reverse
reverse	tumor	-2525	other	G	4	1.65	2.42424	other reverse
reverse	tumor	-2475	CRTR	C	1	1	1	CRTR reverse
reverse	tumor	-2475	CRTR	G	1	1	1	CRTR reverse
reverse	tumor	-2475	GRTR	C	1	1	1	GRTR reverse
reverse	tumor	-2475	GRTR	G	1	1	1	GRTR reverse
reverse	tumor	-2475	other	C	1	1	1	other reverse
reverse	tumor	-2475	other	G	5	1.65	3.0303	other reverse
reverse	tumor	-2425	CRTR	C	1	1	1	CRTR reverse
reverse	tumor	-2425	CRTR	G	1	1	1	CRTR reverse
reverse	tumor	-2425	GRTR	C	1	1	1	GRTR reverse
reverse	tumor	-2425	GRTR	G	1	1	1	GRTR reverse
reverse	tumor	-2425	other	C	1	1	1	other reverse
reverse	tumor	-2425	other	G	5	1.65	3.0303	other reverse
reverse	tumor	-2375	CRTR	C	1	1	1	CRTR reverse
reverse	tumor	-2375	CRTR	G	1	1	1	CRTR reverse
reverse	tumor	-2375	GRTR	C	1	1	1	GRTR reverse
reverse	tumor	-2375	GRTR	G	1	1	1	GRTR reverse
reverse	tumor	-2375	other	C	1	1	1	other reverse
reverse	tumor	-2375	other	G	5	1.65	3.0303	other reverse
reverse	tumor	-2325	CRTR	C	1	1	1	CRTR reverse
reverse	tumor	-2325	CRTR	G	1	1	1	CRTR reverse
reverse	tumor	-2325	GRTR	C	1	1	1	GRTR reverse
reverse	tumor	-2325	GRTR	G	1	1	1	GRTR reverse
reverse	tumor	-2325	other	C	2	1	2	other reverse
reverse	tumor	-2325	other	G	4	1.65	2.42424	other reverse
reverse	tumor	-2275	CRTR	C	1	1	1	CRTR reverse
reverse	tumor	-2275	CRTR	G	1	1	1	CRTR reverse
reverse	tumor	-2275	GRTR	C	1	1	1	GRTR reverse
reverse	tumor	-2275	GRTR	G	1	1	1	GRTR reverse
reverse	tumor	-2275	other	C	7	1	7	other reverse
reverse	tumor	-2275	other	G	2	1.65	1.21212	other reverse
reverse	tumor	-2225	CRTR	C	1	1	1	CRTR reverse
reverse	tumor	-2225	CRTR	G	1	1	1	CRTR reverse
reverse	tumor	-2225	GRTR	C	1	1	1	GRTR reverse
reverse	tumor	-2225	GRTR	G	1	1	1	GRTR reverse
reverse	tumor	-2225	other	C	3	1	3	other reverse
reverse	tumor	-2225	other	G	4	1.65	2.42424	other reverse
reverse	tumor	-2175	CRTR	C	1	1	1	CRTR reverse
reverse	tumor	-2175	CRTR	G	1	1	1	CRTR reverse
reverse	tumor	-2175	GRTR	C	1	1	1	GRTR reverse
reverse	tumor	-2175	GRTR	G	1	1	1	GRTR reverse
reverse	tumor	-2175	other	C	1	1	1	other reverse
reverse	tumor	-2175	other	G	1	1.65	0.606061	other reverse
reverse	tumor	-2125	CRTR	C	1	1	1	CRTR reverse
reverse	tumor	-2125	CRTR	G	1	1	1	CRTR reverse
reverse	tumor	-2125	GRTR	C	1	1	1	GRTR reverse
reverse	tumor	-2125	GRTR	G	1	1	1	GRTR reverse
reverse	tumor	-2125	other	C	1	1	1	other reverse
reverse	tumor	-2125	other	G	1	1.65	0.606061	other reverse
reverse	tumor	-2075	CRTR	C	1	1	1	CRTR reverse
reverse	tumor	-2075	CRTR	G	1	1	1	CRTR reverse
reverse	tumor	-2075	GRTR	C	1	1	1	GRTR reverse
reverse	tumor	-2075	GRTR	G	1	1	1	GRTR reverse
reverse	tumor	-2075	other	C	1	1	1	other reverse
reverse	tumor	-2075	other	G	1	1.65	0.606061	other reverse
reverse	tumor	-2025	CRTR	C	1	1	1	CRTR reverse
reverse	tumor	-2025	CRTR	G	1	1	1	CRTR reverse
reverse	tumor	-2025	GRTR	C	1	1	1	GRTR reverse
reverse	tumor	-2025	GRTR	G	1	1	1	GRTR reverse
reverse	tumor	-2025	other	C	1	1	1	other reverse
reverse	tumor	-2025	other	G	1	1.65	0.606061	other reverse
reverse	tumor	-1975	CRTR	C	1	1	1	CRTR reverse
reverse	tumor	-1975	CRTR	G	1	1	1	CRTR reverse
reverse	tumor	-1975	GRTR	C	1	1	1	GRTR reverse
reverse	tumor	-1975	GRTR	G	1	1	1	GRTR reverse
reverse	tumor	-1975	other	C	1	1	1	other reverse
reverse	tumor	-1975	other	G	1	1.65	0.606061	other reverse
reverse	tumor	-1925	CRTR	C	1	1	1	CRTR reverse
reverse	tumor	-1925	CRTR	G	1	1	1	CRTR reverse
reverse	tumor	-1925	GRTR	C	1	1	1	GRTR reverse
reverse	tumor	-1925	GRTR	G	1	1	1	GRTR reverse
reverse	tumor	-1925	other	C	1	1	1	other reverse
reverse	tumor	-1925	other	G	1	1.65	0.606061	other reverse
reverse	tumor	-1875	CRTR	C	1	1	1	CRTR reverse
reverse	tumor	-1875	CRTR	G	1	1	1	CRTR reverse
reverse	tumor	-1875	GRTR	C	1	1	1	GRTR reverse
reverse	tumor	-1875	GRTR	G	1	1	1	GRTR reverse
reverse	tumor	-1875	other	C	1	1	1	other reverse
reverse	tumor	-1875	other	G	1	1.65	0.606061	other reverse
reverse	tumor	-1825	CRTR	C	1	1	1	CRTR reverse
reverse	tumor	-1825	CRTR	G	1	1	1	CRTR reverse
reverse	tumor	-1825	GRTR	C	1	1	1	GRTR reverse
reverse	tumor	-1825	GRTR	G	1	1	1	GRTR reverse
reverse	tumor	-1825	other	C	1	1	1	other reverse
reverse	tumor	-1825	other	G	1	1.65	0.606061	other reverse
reverse	tumor	-1775	CRTR	C	1	1	1	CRTR reverse
reverse	tumor	-1775	CRTR	G	1	1	1	CRTR reverse
reverse	tumor	-1775	GRTR	C	1	1	1	GRTR reverse
reverse	tumor	-1775	GRTR	G	1	1	1	GRTR reverse
reverse	tumor	-1775	other	C	1	1	1	other reverse
reverse	tumor	-1775	other	G	1	1.65	0.606061	other reverse
reverse	tumor	-1725	CRTR	C	1	1	1	CRTR reverse
reverse	tumor	-1725	CRTR	G	1	1	1	CRTR reverse
reverse	tumor	-1725	GRTR	C	1	1	1	GRTR reverse
reverse	tumor	-1725	GRTR	G	1	1	1	GRTR reverse
reverse	tumor	-1725	other	C	1	1	1	other reverse
reverse	tumor	-1725	other	G	3	1.65	1.81818	other reverse
reverse	tumor	-1675	CRTR	C	1	1	1	CRTR reverse
reverse	tumor	-1675	CRTR	G	1	1	1	CRTR reverse
reverse	tumor	-1675	GRTR	C	1	1	1	GRTR reverse
reverse	tumor	-1675	GRTR	G	1	1	1	GRTR reverse
reverse	tumor	-1675	other	C	1	1	1	other reverse
reverse	tumor	-1675	other	G	1	1.65	0.606061	other reverse
reverse	tumor	-1625	CRTR	C	1	1	1	CRTR reverse
reverse	tumor	-1625	CRTR	G	1	1	1	CRTR reverse
reverse	tumor	-1625	GRTR	C	1	1	1	GRTR reverse
reverse	tumor	-1625	GRTR	G	1	1	1	GRTR reverse
reverse	tumor	-1625	other	C	1	1	1	other reverse
reverse	tumor	-1625	other	G	1	1.65	0.606061	other reverse
reverse	tumor	-1575	CRTR	C	1	1	1	CRTR reverse
reverse	tumor	-1575	CRTR	G	1	1	1	CRTR reverse
reverse	tumor	-1575	GRTR	C	1	1	1	GRTR reverse
reverse	tumor	-1575	GRTR	G	1	1	1	GRTR reverse
reverse	tumor	-1575	other	C	1	1	1	other reverse
reverse	tumor	-1575	other	G	1	1.65	0.606061	other reverse
reverse	tumor	-1525	CRTR	C	1	1	1	CRTR reverse
reverse	tumor	-1525	CRTR	G	1	1	1	CRTR reverse
reverse	tumor	-1525	GRTR	C	1	1	1	GRTR reverse
reverse	tumor	-1525	GRTR	G	1	1	1	GRTR reverse
reverse	tumor	-1525	other	C	1	1	1	other reverse
reverse	tumor	-1525	other	G	1	1.65	0.606061	other reverse
reverse	tumor	-1475	CRTR	C	1	1	1	CRTR reverse
reverse	tumor	-1475	CRTR	G	1	1	1	CRTR reverse
reverse	tumor	-1475	GRTR	C	1	1	1	GRTR reverse
reverse	tumor	-1475	GRTR	G	1	1	1	GRTR reverse
reverse	tumor	-1475	other	C	1	1	1	other reverse
reverse	tumor	-1475	other	G	1	1.65	0.606061	other reverse
reverse	tumor	-1425	CRTR	C	1	1	1	CRTR reverse
reverse	tumor	-1425	CRTR	G	1	1	1	CRTR reverse
reverse	tumor	-1425	GRTR	C	1	1	1	GRTR reverse
reverse	tumor	-1425	GRTR	G	1	1	1	GRTR reverse
reverse	tumor	-1425	other	C	1	1	1	other reverse
reverse	tumor	-1425	other	G	1	1.65	0.606061	other reverse
reverse	tumor	-1375	CRTR	C	1	1	1	CRTR reverse
reverse	tumor	-1375	CRTR	G	1	1	1	CRTR reverse
reverse	tumor	-1375	GRTR	C	1	1	1	GRTR reverse
reverse	tumor	-1375	GRTR	G	1	1	1	GRTR reverse
reverse	tumor	-1375	other	C	1	1	1	other reverse
reverse	tumor	-1375	other	G	3	1.65	1.81818	other reverse
reverse	tumor	-1325	CRTR	C	1	1	1	CRTR reverse
reverse	tumor	-1325	CRTR	G	1	1	1	CRTR reverse
reverse	tumor	-1325	GRTR	C	1	1	1	GRTR reverse
reverse	tumor	-1325	GRTR	G	1	1	1	GRTR reverse
reverse	tumor	-1325	other	C	1	1	1	other reverse
reverse	tumor	-1325	other	G	5	1.65	3.0303	other reverse
reverse	tumor	-1275	CRTR	C	1	1	1	CRTR reverse
reverse	tumor	-1275	CRTR	G	1	1	1	CRTR reverse
reverse	tumor	-1275	GRTR	C	1	1	1	GRTR reverse
reverse	tumor	-1275	GRTR	G	1	1	1	GRTR reverse
reverse	tumor	-1275	other	C	1	1	1	other reverse
reverse	tumor	-1275	other	G	5	1.65	3.0303	other reverse
reverse	tumor	-1225	CRTR	C	1	1	1	CRTR reverse
reverse	tumor	-1225	CRTR	G	1	1	1	CRTR reverse
reverse	tumor	-1225	GRTR	C	1	1	1	GRTR reverse
reverse	tumor	-1225	GRTR	G	1	1	1	GRTR reverse
reverse	tumor	-1225	other	C	1	1	1	other reverse
reverse	tumor	-1225	other	G	1	1.65	0.606061	other reverse
reverse	tumor	-1175	CRTR	C	1	1	1	CRTR reverse
reverse	tumor	-1175	CRTR	G	1	1	1	CRTR reverse
reverse	tumor	-1175	GRTR	C	1	1	1	GRTR reverse
reverse	tumor	-1175	GRTR	G	1	1	1	GRTR reverse
reverse	tumor	-1175	other	C	1	1	1	other reverse
reverse	tumor	-1175	other	G	2	1.65	1.21212	other reverse
reverse	tumor	-1125	CRTR	C	1	1	1	CRTR reverse
reverse	tumor	-1125	CRTR	G	1	1	1	CRTR reverse
reverse	tumor	-1125	GRTR	C	1	1	1	GRTR reverse
reverse	tumor	-1125	GRTR	G	1	1	1	GRTR reverse
reverse	tumor	-1125	other	C	1	1	1	other reverse
reverse	tumor	-1125	other	G	1	1.65	0.606061	other reverse
reverse	tumor	-1075	CRTR	C	1	1	1	CRTR reverse
reverse	tumor	-1075	CRTR	G	1	1	1	CRTR reverse
reverse	tumor	-1075	GRTR	C	1	1	1	GRTR reverse
reverse	tumor	-1075	GRTR	G	1	1	1	GRTR reverse
reverse	tumor	-1075	other	C	1	1	1	other reverse
reverse	tumor	-1075	other	G	1	1.65	0.606061	other reverse
reverse	tumor	-1025	CRTR	C	1	1	1	CRTR reverse
reverse	tumor	-1025	CRTR	G	1	1	1	CRTR reverse
reverse	tumor	-1025	GRTR	C	1	1	1	GRTR reverse
reverse	tumor	-1025	GRTR	G	1	1	1	GRTR reverse
reverse	tumor	-1025	other	C	1	1	1	other reverse
reverse	tumor	-1025	other	G	1	1.65	0.606061	other reverse
reverse	tumor	-975	CRTR	C	1	1	1	CRTR reverse
reverse	tumor	-975	CRTR	G	1	1	1	CRTR reverse
reverse	tumor	-975	GRTR	C	1	1	1	GRTR reverse
reverse	tumor	-975	GRTR	G	1	1	1	GRTR reverse
reverse	tumor	-975	other	C	1	1	1	other reverse
reverse	tumor	-975	other	G	1	1.65	0.606061	other reverse
reverse	tumor	-925	CRTR	C	1	1	1	CRTR reverse
reverse	tumor	-925	CRTR	G	1	1	1	CRTR reverse
reverse	tumor	-925	GRTR	C	1	1	1	GRTR reverse
reverse	tumor	-925	GRTR	G	1	1	1	GRTR reverse
reverse	tumor	-925	other	C	1	1	1	other reverse
reverse	tumor	-925	other	G	1	1.65	0.606061	other reverse
reverse	tumor	-875	CRTR	C	1	1	1	CRTR reverse
reverse	tumor	-875	CRTR	G	1	1	1	CRTR reverse
reverse	tumor	-875	GRTR	C	1	1	1	GRTR reverse
reverse	tumor	-875	GRTR	G	1	1	1	GRTR reverse
reverse	tumor	-875	other	C	1	1	1	other reverse
reverse	tumor	-875	other	G	1	1.65	0.606061	other reverse
reverse	tumor	-825	CRTR	C	1	1	1	CRTR reverse
reverse	tumor	-825	CRTR	G	1	1	1	CRTR reverse
reverse	tumor	-825	GRTR	C	1	1	1	GRTR reverse
reverse	tumor	-825	GRTR	G	1	1	1	GRTR reverse
reverse	tumor	-825	other	C	1	1	1	other reverse
reverse	tumor	-825	other	G	1	1.65	0.606061	other reverse
reverse	tumor	-775	CRTR	C	1	1	1	CRTR reverse
reverse	tumor	-775	CRTR	G	1	1	1	CRTR reverse
reverse	tumor	-775	GRTR	C	1	1	1	GRTR reverse
reverse	tumor	-775	GRTR	G	1	1	1	GRTR reverse
reverse	tumor	-775	other	C	1	1	1	other reverse
reverse	tumor	-775	other	G	8	1.65	4.84848	other reverse
reverse	tumor	-725	CRTR	C	1	1	1	CRTR reverse
reverse	tumor	-725	CRTR	G	1	1	1	CRTR reverse
reverse	tumor	-725	GRTR	C	1	1	1	GRTR reverse
reverse	tumor	-725	GRTR	G	1	1	1	GRTR reverse
reverse	tumor	-725	other	C	1	1	1	other reverse
reverse	tumor	-725	other	G	1	1.65	0.606061	other reverse
reverse	tumor	-675	CRTR	C	1	1	1	CRTR reverse
reverse	tumor	-675	CRTR	G	1	1	1	CRTR reverse
reverse	tumor	-675	GRTR	C	1	1	1	GRTR reverse
reverse	tumor	-675	GRTR	G	1	1	1	GRTR reverse
reverse	tumor	-675	other	C	1	1	1	other reverse
reverse	tumor	-675	other	G	1	1.65	0.606061	other reverse
reverse	tumor	-625	CRTR	C	1	1	1	CRTR reverse
reverse	tumor	-625	CRTR	G	1	1	1	CRTR reverse
reverse	tumor	-625	GRTR	C	1	1	1	GRTR reverse
reverse	tumor	-625	GRTR	G	1	1	1	GRTR reverse
reverse	tumor	-625	other	C	1	1	1	other reverse
reverse	tumor	-625	other	G	2	1.65	1.21212	other reverse
reverse	tumor	-575	CRTR	C	1	1	1	CRTR reverse
reverse	tumor	-575	CRTR	G	1	1	1	CRTR reverse
reverse	tumor	-575	GRTR	C	1	1	1	GRTR reverse
reverse	tumor	-575	GRTR	G	1	1	1	GRTR reverse
reverse	tumor	-575	other	C	2	1	2	other reverse
reverse	tumor	-575	other	G	1	1.65	0.606061	other reverse
reverse	tumor	-525	CRTR	C	1	1	1	CRTR reverse
reverse	tumor	-525	CRTR	G	1	1	1	CRTR reverse
reverse	tumor	-525	GRTR	C	1	1	1	GRTR reverse
reverse	tumor	-525	GRTR	G	1	1	1	GRTR reverse
reverse	tumor	-525	other	C	1	1	1	other reverse
reverse	tumor	-525	other	G	2	1.65	1.21212	other reverse
reverse	tumor	-475	CRTR	C	1	1	1	CRTR reverse
reverse	tumor	-475	CRTR	G	1	1	1	CRTR reverse
reverse	tumor	-475	GRTR	C	1	1	1	GRTR reverse
reverse	tumor	-475	GRTR	G	1	1	1	GRTR reverse
reverse	tumor	-475	other	C	1	1	1	other reverse
reverse	tumor	-475	other	G	2	1.65	1.21212	other reverse
reverse	tumor	-425	CRTR	C	1	1	1	CRTR reverse
reverse	tumor	-425	CRTR	G	1	1	1	CRTR reverse
reverse	tumor	-425	GRTR	C	1	1	1	GRTR reverse
reverse	tumor	-425	GRTR	G	1	1	1	GRTR reverse
reverse	tumor	-425	other	C	3	1	3	other reverse
reverse	tumor	-425	other	G	1	1.65	0.606061	other reverse
reverse	tumor	-375	CRTR	C	1	1	1	CRTR reverse
reverse	tumor	-375	CRTR	G	1	1	1	CRTR reverse
reverse	tumor	-375	GRTR	C	1	1	1	GRTR reverse
reverse	tumor	-375	GRTR	G	1	1	1	GRTR reverse
reverse	tumor	-375	other	C	2	1	2	other reverse
reverse	tumor	-375	other	G	1	1.65	0.606061	other reverse
reverse	tumor	-325	CRTR	C	1	1	1	CRTR reverse
reverse	tumor	-325	CRTR	G	1	1	1	CRTR reverse
reverse	tumor	-325	GRTR	C	1	1	1	GRTR reverse
reverse	tumor	-325	GRTR	G	1	1	1	GRTR reverse
reverse	tumor	-325	other	C	1	1	1	other reverse
reverse	tumor	-325	other	G	6	1.65	3.63636	other reverse
reverse	tumor	-275	CRTR	C	1	1	1	CRTR reverse
reverse	tumor	-275	CRTR	G	1	1	1	CRTR reverse
reverse	tumor	-275	GRTR	C	5	1	5	GRTR reverse
reverse	tumor	-275	GRTR	G	1	1	1	GRTR reverse
reverse	tumor	-275	other	C	2	1	2	other reverse
reverse	tumor	-275	other	G	4	1.65	2.42424	other reverse
reverse	tumor	-225	CRTR	C	1	1	1	CRTR reverse
reverse	tumor	-225	CRTR	G	1	1	1	CRTR reverse
reverse	tumor	-225	GRTR	C	1	1	1	GRTR reverse
reverse	tumor	-225	GRTR	G	1	1	1	GRTR reverse
reverse	tumor	-225	other	C	3	1	3	other reverse
reverse	tumor	-225	other	G	12	1.65	7.27273	other reverse
reverse	tumor	-175	CRTR	C	1	1	1	CRTR reverse
reverse	tumor	-175	CRTR	G	1	1	1	CRTR reverse
reverse	tumor	-175	GRTR	C	1	1	1	GRTR reverse
reverse	tumor	-175	GRTR	G	1	1	1	GRTR reverse
reverse	tumor	-175	other	C	3	1	3	other reverse
reverse	tumor	-175	other	G	5	1.65	3.0303	other reverse
reverse	tumor	-125	CRTR	C	1	1	1	CRTR reverse
reverse	tumor	-125	CRTR	G	1	1	1	CRTR reverse
reverse	tumor	-125	GRTR	C	1	1	1	GRTR reverse
reverse	tumor	-125	GRTR	G	1	1	1	GRTR reverse
reverse	tumor	-125	other	C	3	1	3	other reverse
reverse	tumor	-125	other	G	9	1.65	5.45455	other reverse
reverse	tumor	-75	CRTR	C	1	1	1	CRTR reverse
reverse	tumor	-75	CRTR	G	1	1	1	CRTR reverse
reverse	tumor	-75	GRTR	C	1	1	1	GRTR reverse
reverse	tumor	-75	GRTR	G	1	1	1	GRTR reverse
reverse	tumor	-75	other	C	2	1	2	other reverse
reverse	tumor	-75	other	G	2	1.65	1.21212	other reverse
reverse	tumor	-25	CRTR	C	1	1	1	CRTR reverse
reverse	tumor	-25	CRTR	G	1	1	1	CRTR reverse
reverse	tumor	-25	GRTR	C	1	1	1	GRTR reverse
reverse	tumor	-25	GRTR	G	3	1	3	GRTR reverse
reverse	tumor	-25	other	C	4	1	4	other reverse
reverse	tumor	-25	other	G	2	1.65	1.21212	other reverse
reverse	tumor	25	CRTR	C	1	1	1	CRTR reverse
reverse	tumor	25	CRTR	G	1	1	1	CRTR reverse
reverse	tumor	25	GRTR	C	1	1	1	GRTR reverse
reverse	tumor	25	GRTR	G	1	1	1	GRTR reverse
reverse	tumor	25	other	C	5	1	5	other reverse
reverse	tumor	25	other	G	3	1.65	1.81818	other reverse
reverse	tumor	75	CRTR	C	1	1	1	CRTR reverse
reverse	tumor	75	CRTR	G	1	1	1	CRTR reverse
reverse	tumor	75	GRTR	C	1	1	1	GRTR reverse
reverse	tumor	75	GRTR	G	1	1	1	GRTR reverse
reverse	tumor	75	other	C	4	1	4	other reverse
reverse	tumor	75	other	G	1	1.65	0.606061	other reverse
reverse	tumor	125	CRTR	C	1	1	1	CRTR reverse
reverse	tumor	125	CRTR	G	1	1	1	CRTR reverse
reverse	tumor	125	GRTR	C	1	1	1	GRTR reverse
reverse	tumor	125	GRTR	G	1	1	1	GRTR reverse
reverse	tumor	125	other	C	8	1	8	other reverse
reverse	tumor	125	other	G	2	1.65	1.21212	other reverse
reverse	tumor	175	CRTR	C	1	1	1	CRTR reverse
reverse	tumor	175	CRTR	G	1	1	1	CRTR reverse
reverse	tumor	175	GRTR	C	1	1	1	GRTR reverse
reverse	tumor	175	GRTR	G	1	1	1	GRTR reverse
reverse	tumor	175	other	C	5	1	5	other reverse
reverse	tumor	175	other	G	6	1.65	3.63636	other reverse
reverse	tumor	225	CRTR	C	1	1	1	CRTR reverse
reverse	tumor	225	CRTR	G	1	1	1	CRTR reverse
reverse	tumor	225	GRTR	C	1	1	1	GRTR reverse
reverse	tumor	225	GRTR	G	1	1	1	GRTR reverse
reverse	tumor	225	other	C	3	1	3	other reverse
reverse	tumor	225	other	G	2	1.65	1.21212	other reverse
reverse	tumor	275	CRTR	C	1	1	1	CRTR reverse
reverse	tumor	275	CRTR	G	1	1	1	CRTR reverse
reverse	tumor	275	GRTR	C	2	1	2	GRTR reverse
reverse	tumor	275	GRTR	G	1	1	1	GRTR reverse
reverse	tumor	275	other	C	1	1	1	other reverse
reverse	tumor	275	other	G	1	1.65	0.606061	other reverse
reverse	tumor	325	CRTR	C	1	1	1	CRTR reverse
reverse	tumor	325	CRTR	G	1	1	1	CRTR reverse
reverse	tumor	325	GRTR	C	1	1	1	GRTR reverse
reverse	tumor	325	GRTR	G	1	1	1	GRTR reverse
reverse	tumor	325	other	C	1	1	1	other reverse
reverse	tumor	325	other	G	1	1.65	0.606061	other reverse
reverse	tumor	375	CRTR	C	1	1	1	CRTR reverse
reverse	tumor	375	CRTR	G	1	1	1	CRTR reverse
reverse	tumor	375	GRTR	C	1	1	1	GRTR reverse
reverse	tumor	375	GRTR	G	1	1	1	GRTR reverse
reverse	tumor	375	other	C	1	1	1	other reverse
reverse	tumor	375	other	G	1	1.65	0.606061	other reverse
reverse	tumor	425	CRTR	C	1	1	1	CRTR reverse
reverse	tumor	425	CRTR	G	1	1	1	CRTR reverse
reverse	tumor	425	GRTR	C	1	1	1	GRTR reverse
reverse	tumor	425	GRTR	G	1	1	1	GRTR reverse
reverse	tumor	425	other	C	3	1	3	other reverse
reverse	tumor	425	other	G	1	1.65	0.606061	other reverse
reverse	tumor	475	CRTR	C	1	1	1	CRTR reverse
reverse	tumor	475	CRTR	G	1	1	1	CRTR reverse
reverse	tumor	475	GRTR	C	1	1	1	GRTR reverse
reverse	tumor	475	GRTR	G	1	1	1	GRTR reverse
reverse	tumor	475	other	C	1	1	1	other reverse
reverse	tumor	475	other	G	1	1.65	0.606061	other reverse
reverse	tumor	525	CRTR	C	1	1	1	CRTR reverse
reverse	tumor	525	CRTR	G	1	1	1	CRTR reverse
reverse	tumor	525	GRTR	C	1	1	1	GRTR reverse
reverse	tumor	525	GRTR	G	1	1	1	GRTR reverse
reverse	tumor	525	other	C	1	1	1	other reverse
reverse	tumor	525	other	G	1	1.65	0.606061	other reverse
reverse	tumor	575	CRTR	C	1	1	1	CRTR reverse
reverse	tumor	575	CRTR	G	1	1	1	CRTR reverse
reverse	tumor	575	GRTR	C	1	1	1	GRTR reverse
reverse	tumor	575	GRTR	G	1	1	1	GRTR reverse
reverse	tumor	575	other	C	1	1	1	other reverse
reverse	tumor	575	other	G	1	1.65	0.606061	other reverse
reverse	tumor	625	CRTR	C	1	1	1	CRTR reverse
reverse	tumor	625	CRTR	G	2	1	2	CRTR reverse
reverse	tumor	625	GRTR	C	1	1	1	GRTR reverse
reverse	tumor	625	GRTR	G	1	1	1	GRTR reverse
reverse	tumor	625	other	C	1	1	1	other reverse
reverse	tumor	625	other	G	1	1.65	0.606061	other reverse
reverse	tumor	675	CRTR	C	1	1	1	CRTR reverse
reverse	tumor	675	CRTR	G	3	1	3	CRTR reverse
reverse	tumor	675	GRTR	C	1	1	1	GRTR reverse
reverse	tumor	675	GRTR	G	1	1	1	GRTR reverse
reverse	tumor	675	other	C	1	1	1	other reverse
reverse	tumor	675	other	G	1	1.65	0.606061	other reverse
reverse	tumor	725	CRTR	C	1	1	1	CRTR reverse
reverse	tumor	725	CRTR	G	1	1	1	CRTR reverse
reverse	tumor	725	GRTR	C	1	1	1	GRTR reverse
reverse	tumor	725	GRTR	G	1	1	1	GRTR reverse
reverse	tumor	725	other	C	1	1	1	other reverse
reverse	tumor	725	other	G	1	1.65	0.606061	other reverse
reverse	tumor	775	CRTR	C	1	1	1	CRTR reverse
reverse	tumor	775	CRTR	G	3	1	3	CRTR reverse
reverse	tumor	775	GRTR	C	1	1	1	GRTR reverse
reverse	tumor	775	GRTR	G	1	1	1	GRTR reverse
reverse	tumor	775	other	C	1	1	1	other reverse
reverse	tumor	775	other	G	1	1.65	0.606061	other reverse
reverse	tumor	825	CRTR	C	1	1	1	CRTR reverse
reverse	tumor	825	CRTR	G	2	1	2	CRTR reverse
reverse	tumor	825	GRTR	C	1	1	1	GRTR reverse
reverse	tumor	825	GRTR	G	1	1	1	GRTR reverse
reverse	tumor	825	other	C	1	1	1	other reverse
reverse	tumor	825	other	G	1	1.65	0.606061	other reverse
reverse	tumor	875	CRTR	C	1	1	1	CRTR reverse
reverse	tumor	875	CRTR	G	1	1	1	CRTR reverse
reverse	tumor	875	GRTR	C	1	1	1	GRTR reverse
reverse	tumor	875	GRTR	G	1	1	1	GRTR reverse
reverse	tumor	875	other	C	1	1	1	other reverse
reverse	tumor	875	other	G	1	1.65	0.606061	other reverse
reverse	tumor	925	CRTR	C	1	1	1	CRTR reverse
reverse	tumor	925	CRTR	G	1	1	1	CRTR reverse
reverse	tumor	925	GRTR	C	1	1	1	GRTR reverse
reverse	tumor	925	GRTR	G	1	1	1	GRTR reverse
reverse	tumor	925	other	C	1	1	1	other reverse
reverse	tumor	925	other	G	4	1.65	2.42424	other reverse
reverse	tumor	975	CRTR	C	1	1	1	CRTR reverse
reverse	tumor	975	CRTR	G	1	1	1	CRTR reverse
reverse	tumor	975	GRTR	C	1	1	1	GRTR reverse
reverse	tumor	975	GRTR	G	1	1	1	GRTR reverse
reverse	tumor	975	other	C	1	1	1	other reverse
reverse	tumor	975	other	G	1	1.65	0.606061	other reverse
reverse	tumor	1025	CRTR	C	1	1	1	CRTR reverse
reverse	tumor	1025	CRTR	G	1	1	1	CRTR reverse
reverse	tumor	1025	GRTR	C	1	1	1	GRTR reverse
reverse	tumor	1025	GRTR	G	1	1	1	GRTR reverse
reverse	tumor	1025	other	C	1	1	1	other reverse
reverse	tumor	1025	other	G	1	1.65	0.606061	other reverse
reverse	tumor	1075	CRTR	C	1	1	1	CRTR reverse
reverse	tumor	1075	CRTR	G	1	1	1	CRTR reverse
reverse	tumor	1075	GRTR	C	1	1	1	GRTR reverse
reverse	tumor	1075	GRTR	G	1	1	1	GRTR reverse
reverse	tumor	1075	other	C	1	1	1	other reverse
reverse	tumor	1075	other	G	1	1.65	0.606061	other reverse
reverse	tumor	1125	CRTR	C	1	1	1	CRTR reverse
reverse	tumor	1125	CRTR	G	1	1	1	CRTR reverse
reverse	tumor	1125	GRTR	C	1	1	1	GRTR reverse
reverse	tumor	1125	GRTR	G	1	1	1	GRTR reverse
reverse	tumor	1125	other	C	1	1	1	other reverse
reverse	tumor	1125	other	G	1	1.65	0.606061	other reverse
reverse	tumor	1175	CRTR	C	1	1	1	CRTR reverse
reverse	tumor	1175	CRTR	G	1	1	1	CRTR reverse
reverse	tumor	1175	GRTR	C	1	1	1	GRTR reverse
reverse	tumor	1175	GRTR	G	1	1	1	GRTR reverse
reverse	tumor	1175	other	C	1	1	1	other reverse
reverse	tumor	1175	other	G	1	1.65	0.606061	other reverse
reverse	tumor	1225	CRTR	C	1	1	1	CRTR reverse
reverse	tumor	1225	CRTR	G	1	1	1	CRTR reverse
reverse	tumor	1225	GRTR	C	1	1	1	GRTR reverse
reverse	tumor	1225	GRTR	G	1	1	1	GRTR reverse
reverse	tumor	1225	other	C	1	1	1	other reverse
reverse	tumor	1225	other	G	2	1.65	1.21212	other reverse
reverse	tumor	1275	CRTR	C	1	1	1	CRTR reverse
reverse	tumor	1275	CRTR	G	1	1	1	CRTR reverse
reverse	tumor	1275	GRTR	C	1	1	1	GRTR reverse
reverse	tumor	1275	GRTR	G	1	1	1	GRTR reverse
reverse	tumor	1275	other	C	1	1	1	other reverse
reverse	tumor	1275	other	G	1	1.65	0.606061	other reverse
reverse	tumor	1325	CRTR	C	1	1	1	CRTR reverse
reverse	tumor	1325	CRTR	G	1	1	1	CRTR reverse
reverse	tumor	1325	GRTR	C	1	1	1	GRTR reverse
reverse	tumor	1325	GRTR	G	1	1	1	GRTR reverse
reverse	tumor	1325	other	C	1	1	1	other reverse
reverse	tumor	1325	other	G	1	1.65	0.606061	other reverse
reverse	tumor	1375	CRTR	C	1	1	1	CRTR reverse
reverse	tumor	1375	CRTR	G	1	1	1	CRTR reverse
reverse	tumor	1375	GRTR	C	1	1	1	GRTR reverse
reverse	tumor	1375	GRTR	G	1	1	1	GRTR reverse
reverse	tumor	1375	other	C	1	1	1	other reverse
reverse	tumor	1375	other	G	1	1.65	0.606061	other reverse
reverse	tumor	1425	CRTR	C	1	1	1	CRTR reverse
reverse	tumor	1425	CRTR	G	1	1	1	CRTR reverse
reverse	tumor	1425	GRTR	C	1	1	1	GRTR reverse
reverse	tumor	1425	GRTR	G	1	1	1	GRTR reverse
reverse	tumor	1425	other	C	2	1	2	other reverse
reverse	tumor	1425	other	G	1	1.65	0.606061	other reverse
reverse	tumor	1475	CRTR	C	1	1	1	CRTR reverse
reverse	tumor	1475	CRTR	G	1	1	1	CRTR reverse
reverse	tumor	1475	GRTR	C	1	1	1	GRTR reverse
reverse	tumor	1475	GRTR	G	1	1	1	GRTR reverse
reverse	tumor	1475	other	C	1	1	1	other reverse
reverse	tumor	1475	other	G	2	1.65	1.21212	other reverse
reverse	tumor	1525	CRTR	C	1	1	1	CRTR reverse
reverse	tumor	1525	CRTR	G	1	1	1	CRTR reverse
reverse	tumor	1525	GRTR	C	1	1	1	GRTR reverse
reverse	tumor	1525	GRTR	G	1	1	1	GRTR reverse
reverse	tumor	1525	other	C	1	1	1	other reverse
reverse	tumor	1525	other	G	1	1.65	0.606061	other reverse
reverse	tumor	1575	CRTR	C	1	1	1	CRTR reverse
reverse	tumor	1575	CRTR	G	1	1	1	CRTR reverse
reverse	tumor	1575	GRTR	C	1	1	1	GRTR reverse
reverse	tumor	1575	GRTR	G	1	1	1	GRTR reverse
reverse	tumor	1575	other	C	1	1	1	other reverse
reverse	tumor	1575	other	G	1	1.65	0.606061	other reverse
reverse	tumor	1625	CRTR	C	1	1	1	CRTR reverse
reverse	tumor	1625	CRTR	G	1	1	1	CRTR reverse
reverse	tumor	1625	GRTR	C	1	1	1	GRTR reverse
reverse	tumor	1625	GRTR	G	1	1	1	GRTR reverse
reverse	tumor	1625	other	C	1	1	1	other reverse
reverse	tumor	1625	other	G	1	1.65	0.606061	other reverse
reverse	tumor	1675	CRTR	C	1	1	1	CRTR reverse
reverse	tumor	1675	CRTR	G	1	1	1	CRTR reverse
reverse	tumor	1675	GRTR	C	1	1	1	GRTR reverse
reverse	tumor	1675	GRTR	G	1	1	1	GRTR reverse
reverse	tumor	1675	other	C	1	1	1	other reverse
reverse	tumor	1675	other	G	1	1.65	0.606061	other reverse
reverse	tumor	1725	CRTR	C	1	1	1	CRTR reverse
reverse	tumor	1725	CRTR	G	1	1	1	CRTR reverse
reverse	tumor	1725	GRTR	C	1	1	1	GRTR reverse
reverse	tumor	1725	GRTR	G	1	1	1	GRTR reverse
reverse	tumor	1725	other	C	1	1	1	other reverse
reverse	tumor	1725	other	G	1	1.65	0.606061	other reverse
reverse	tumor	1775	CRTR	C	1	1	1	CRTR reverse
reverse	tumor	1775	CRTR	G	1	1	1	CRTR reverse
reverse	tumor	1775	GRTR	C	1	1	1	GRTR reverse
reverse	tumor	1775	GRTR	G	1	1	1	GRTR reverse
reverse	tumor	1775	other	C	1	1	1	other reverse
reverse	tumor	1775	other	G	1	1.65	0.606061	other reverse
reverse	tumor	1825	CRTR	C	1	1	1	CRTR reverse
reverse	tumor	1825	CRTR	G	1	1	1	CRTR reverse
reverse	tumor	1825	GRTR	C	1	1	1	GRTR reverse
reverse	tumor	1825	GRTR	G	1	1	1	GRTR reverse
reverse	tumor	1825	other	C	2	1	2	other reverse
reverse	tumor	1825	other	G	1	1.65	0.606061	other reverse
reverse	tumor	1875	CRTR	C	1	1	1	CRTR reverse
reverse	tumor	1875	CRTR	G	1	1	1	CRTR reverse
reverse	tumor	1875	GRTR	C	1	1	1	GRTR reverse
reverse	tumor	1875	GRTR	G	1	1	1	GRTR reverse
reverse	tumor	1875	other	C	5	1	5	other reverse
reverse	tumor	1875	other	G	1	1.65	0.606061	other reverse
reverse	tumor	1925	CRTR	C	1	1	1	CRTR reverse
reverse	tumor	1925	CRTR	G	1	1	1	CRTR reverse
reverse	tumor	1925	GRTR	C	1	1	1	GRTR reverse
reverse	tumor	1925	GRTR	G	1	1	1	GRTR reverse
reverse	tumor	1925	other	C	1	1	1	other reverse
reverse	tumor	1925	other	G	1	1.65	0.606061	other reverse
reverse	tumor	1975	CRTR	C	1	1	1	CRTR reverse
reverse	tumor	1975	CRTR	G	1	1	1	CRTR reverse
reverse	tumor	1975	GRTR	C	1	1	1	GRTR reverse
reverse	tumor	1975	GRTR	G	1	1	1	GRTR reverse
reverse	tumor	1975	other	C	1	1	1	other reverse
reverse	tumor	1975	other	G	1	1.65	0.606061	other reverse
reverse	tumor	2025	CRTR	C	1	1	1	CRTR reverse
reverse	tumor	2025	CRTR	G	1	1	1	CRTR reverse
reverse	tumor	2025	GRTR	C	1	1	1	GRTR reverse
reverse	tumor	2025	GRTR	G	1	1	1	GRTR reverse
reverse	tumor	2025	other	C	4	1	4	other reverse
reverse	tumor	2025	other	G	1	1.65	0.606061	other reverse
reverse	tumor	2075	CRTR	C	1	1	1	CRTR reverse
[truncated: 329 more rows]

## Sheet: 3D
bin	type	n	norm.factor	norm.n	x
475000	control	1	136	0.00735294	475
-35000	control	189	136	1.38971	-35
-25000	control	242	136	1.77941	-25
-15000	control	236	136	1.73529	-15
-5000	control	400	136	2.94118	-5
5000	control	228	136	1.67647	5
195000	control	2	136	0.0147059	195
265000	control	54	136	0.397059	265
275000	control	83	136	0.610294	275
285000	control	138	136	1.01471	285
295000	control	104	136	0.764706	295
305000	control	119	136	0.875	305
315000	control	82	136	0.602941	315
325000	control	68	136	0.5	325
335000	control	54	136	0.397059	335
-5000	GRTR	329	16.4	20.061	-5
-345000	GRTR	4	16.4	0.243902	-345
-355000	GRTR	17	16.4	1.03659	-355
25000	control	145	136	1.06618	25
-455000	control	8	136	0.0588235	-455
-465000	control	28	136	0.205882	-465
-475000	control	25	136	0.183824	-475
-485000	control	27	136	0.198529	-485
-495000	control	48	136	0.352941	-495
-115000	GRTR	12	16.4	0.731707	-115
-105000	GRTR	10	16.4	0.609756	-105
-95000	GRTR	18	16.4	1.09756	-95
-85000	GRTR	17	16.4	1.03659	-85
-55000	GRTR	71	16.4	4.32927	-55
-45000	GRTR	99	16.4	6.03659	-45
-25000	GRTR	173	16.4	10.5488	-25
-15000	GRTR	244	16.4	14.878	-15
5000	GRTR	40	16.4	2.43902	5
15000	control	213	136	1.56618	15
-245000	GRTR	7	16.4	0.426829	-245
395000	GRTR	26	16.4	1.58537	395
-465000	GRTR	13	16.4	0.792683	-465
215000	GRTR	1	16.4	0.0609756	215
35000	control	42	136	0.308824	35
-95000	control	116	136	0.852941	-95
-85000	control	146	136	1.07353	-85
-65000	control	85	136	0.625	-65
-55000	control	506	136	3.72059	-55
-45000	control	134	136	0.985294	-45
-35000	GRTR	131	16.4	7.9878	-35
45000	GRTR	13	16.4	0.792683	45
35000	GRTR	15	16.4	0.914634	35
25000	GRTR	2	16.4	0.121951	25
15000	GRTR	12	16.4	0.731707	15
-65000	GRTR	48	16.4	2.92683	-65
-75000	GRTR	41	16.4	2.5	-75
-125000	GRTR	19	16.4	1.15854	-125
-295000	control	47	136	0.345588	-295
-435000	control	30	136	0.220588	-435
-425000	control	35	136	0.257353	-425
-415000	control	72	136	0.529412	-415
-405000	control	48	136	0.352941	-405
-395000	control	19	136	0.139706	-395
-185000	control	34	136	0.25	-185
55000	control	69	136	0.507353	55
65000	control	33	136	0.242647	65
75000	control	47	136	0.345588	75
85000	control	20	136	0.147059	85
95000	control	19	136	0.139706	95
115000	control	2	136	0.0147059	115
125000	control	7	136	0.0514706	125
145000	control	13	136	0.0955882	145
155000	control	4	136	0.0294118	155
105000	control	3	136	0.0220588	105
-455000	GRTR	10	16.4	0.609756	-455
-445000	GRTR	8	16.4	0.487805	-445
485000	control	5	136	0.0367647	485
495000	control	14	136	0.102941	495
185000	GRTR	2	16.4	0.121951	185
-105000	control	107	136	0.786765	-105
-115000	control	60	136	0.441176	-115
-325000	control	67	136	0.492647	-325
-75000	control	119	136	0.875	-75
-215000	control	44	136	0.323529	-215
-205000	control	26	136	0.191176	-205
-195000	control	21	136	0.154412	-195
-285000	control	57	136	0.419118	-285
-275000	control	41	136	0.301471	-275
-215000	GRTR	6	16.4	0.365854	-215
205000	GRTR	5	16.4	0.304878	205
255000	control	40	136	0.294118	255
-345000	control	111	136	0.816176	-345
-335000	control	80	136	0.588235	-335
-165000	control	41	136	0.301471	-165
-175000	control	27	136	0.198529	-175
455000	control	2	136	0.0147059	455
445000	control	9	136	0.0661765	445
435000	control	7	136	0.0514706	435
-155000	control	22	136	0.161765	-155
425000	control	23	136	0.169118	425
-145000	control	31	136	0.227941	-145
415000	control	16	136	0.117647	415
-135000	control	40	136	0.294118	-135
45000	control	52	136	0.382353	45
405000	control	32	136	0.235294	405
-125000	control	40	136	0.294118	-125
-225000	control	61	136	0.448529	-225
395000	control	40	136	0.294118	395
-235000	control	79	136	0.580882	-235
385000	control	37	136	0.272059	385
-245000	control	73	136	0.536765	-245
375000	control	61	136	0.448529	375
-255000	control	63	136	0.463235	-255
365000	control	48	136	0.352941	365
-265000	control	119	136	0.875	-265
355000	control	57	136	0.419118	355
345000	control	19	136	0.139706	345
-305000	control	46	136	0.338235	-305
-315000	control	102	136	0.75	-315
-355000	control	86	136	0.632353	-355
-365000	control	71	136	0.522059	-365
-375000	control	40	136	0.294118	-375
245000	control	2	136	0.0147059	245
-385000	control	12	136	0.0882353	-385
235000	control	11	136	0.0808824	235
225000	control	14	136	0.102941	225
-445000	control	21	136	0.154412	-445
175000	GRTR	1	16.4	0.0609756	175
465000	GRTR	2	16.4	0.121951	465
455000	GRTR	4	16.4	0.243902	455
445000	GRTR	6	16.4	0.365854	445
435000	GRTR	3	16.4	0.182927	435
425000	GRTR	9	16.4	0.54878	425
415000	GRTR	8	16.4	0.487805	415
-365000	GRTR	2	16.4	0.121951	-365
55000	GRTR	2	16.4	0.121951	55
65000	GRTR	2	16.4	0.121951	65
-145000	GRTR	4	16.4	0.243902	-145
215000	control	2	136	0.0147059	215
-135000	GRTR	8	16.4	0.487805	-135
-155000	GRTR	6	16.4	0.365854	-155
-165000	GRTR	4	16.4	0.243902	-165
-175000	GRTR	7	16.4	0.426829	-175
-185000	GRTR	9	16.4	0.54878	-185
-195000	GRTR	2	16.4	0.121951	-195
-205000	GRTR	2	16.4	0.121951	-205
-225000	GRTR	13	16.4	0.792683	-225
-235000	GRTR	8	16.4	0.487805	-235
-255000	GRTR	14	16.4	0.853659	-255

## Sheet: 3E
label	n.lrs	n.samples	frac	ci.lower	ci.upper	paper.factors
other	575	3416	0.168326	0.156011	0.181394	other
GRTR	1	71	0.0140845	0.000735652	0.0865186	GRTR
CRTR	13	28	0.464286	0.280102	0.657869	CRTR

## Sheet: 3F
loose.end	sample	tlength	category
10:106362531+	G16385.NCI-H661	0	neg ctrl
10:38791006-	G16385.NCI-H661	1196.54	neg ctrl
10:68345007+	G16385.NCI-H661	0	neg ctrl
12:37913007+	G16385.NCI-H661	0	neg ctrl
13:52821499-	G16385.NCI-H661	0	neg ctrl
14:26225007+	G16385.NCI-H661	0	neg ctrl
14:36423853-	G16385.NCI-H661	0	neg ctrl
14:50245007+	G16385.NCI-H661	1706.5	neg ctrl
18:14895239-	G16385.NCI-H661	0	neg ctrl
19:33084268+	G16385.NCI-H661	0	neg ctrl
20:25368007+	G16385.NCI-H661	0	neg ctrl
2:128703537-	G16385.NCI-H661	0	neg ctrl
3:71690535+	G16385.NCI-H661	0	neg ctrl
3:77336007+	G16385.NCI-H661	0	neg ctrl
4:124080575-	G16385.NCI-H661	0	neg ctrl
4:168903813+	G16385.NCI-H661	0	neg ctrl
4:28719876-	G16385.NCI-H661	0	neg ctrl
4:36200007+	G16385.NCI-H661	0	neg ctrl
4:44462006-	G16385.NCI-H661	0	neg ctrl
5:42745007+	G16385.NCI-H661	0	neg ctrl
6:116117702+	G16385.NCI-H661	0	neg ctrl
6:38458007+	G16385.NCI-H661	2158	neg ctrl
6:62507834-	G16385.NCI-H661	0	neg ctrl
7:69919007+	G16385.NCI-H661	0	neg ctrl
7:85896006-	G16385.NCI-H661	0	neg ctrl
8:46931007+	G16385.NCI-H661	0	neg ctrl
8:62032309-	G16385.NCI-H661	7882.5	neg ctrl
X:140561006-	G16385.NCI-H661	0	neg ctrl
11:106965856+	G16396.NCI-H526	0	neg ctrl
11:134793006-	G16396.NCI-H526	0	neg ctrl
13:86656006-	G16396.NCI-H526	0	neg ctrl
14:41669007+	G16396.NCI-H526	0	neg ctrl
17:21700007+	G16396.NCI-H526	0	neg ctrl
17:22194007+	G16396.NCI-H526	0	neg ctrl
19:24512008+	G16396.NCI-H526	0	neg ctrl
19:57046006-	G16396.NCI-H526	0	neg ctrl
1:16628575+	G16396.NCI-H526	0	neg ctrl
1:16856669-	G16396.NCI-H526	0	neg ctrl
1:188869067-	G16396.NCI-H526	0	neg ctrl
1:38499006-	G16396.NCI-H526	2462	neg ctrl
2:13547006-	G16396.NCI-H526	0	neg ctrl
2:15241615+	G16396.NCI-H526	3397.5	neg ctrl
2:15501007+	G16396.NCI-H526	2284.04	neg ctrl
2:15586006-	G16396.NCI-H526	1634.14	neg ctrl
2:15863007+	G16396.NCI-H526	2894.82	neg ctrl
2:16628006-	G16396.NCI-H526	2101.68	neg ctrl
2:238415007+	G16396.NCI-H526	0	neg ctrl
3:103724007+	G16396.NCI-H526	1360	neg ctrl
3:147696006-	G16396.NCI-H526	0	neg ctrl
3:182957006-	G16396.NCI-H526	0	neg ctrl
5:32309007+	G16396.NCI-H526	2273	neg ctrl
6:135584006-	G16396.NCI-H526	0	neg ctrl
6:168334007+	G16396.NCI-H526	0	neg ctrl
6:168598006-	G16396.NCI-H526	0	neg ctrl
7:141766006-	G16396.NCI-H526	0	neg ctrl
9:43635006-	G16396.NCI-H526	0	neg ctrl
11:47321007+	U2OS_1	1943	neg ctrl
12:74060006-	U2OS_1	0	neg ctrl
12:80050007+	U2OS_1	0	neg ctrl
12:80267006-	U2OS_1	0	neg ctrl
14:48918007+	U2OS_1	0	neg ctrl
14:85841007+	U2OS_1	0	neg ctrl
15:75511006-	U2OS_1	0	neg ctrl
16:14666006-	U2OS_1	0	neg ctrl
16:32028008+	U2OS_1	0	neg ctrl
16:8607292+	U2OS_1	0	neg ctrl
16:89418006-	U2OS_1	0	neg ctrl
17:34437007+	U2OS_1	0	neg ctrl
1:108906007+	U2OS_1	4050.62	neg ctrl
1:231229007+	U2OS_1	5854	neg ctrl
20:61984006-	U2OS_1	2478	neg ctrl
2:3502006-	U2OS_1	0	neg ctrl
3:99444007-	U2OS_1	2209	neg ctrl
4:70125006-	U2OS_1	0	neg ctrl
5:132027007+	U2OS_1	0	neg ctrl
5:142934007+	U2OS_1	0	neg ctrl
6:118929007+	U2OS_1	0	neg ctrl
6:76920006-	U2OS_1	0	neg ctrl
7:56582006-	U2OS_1	2552.17	neg ctrl
7:76694007+	U2OS_1	0	neg ctrl
8:24953007+	U2OS_1	2826.5	neg ctrl
8:77592007+	U2OS_1	0	neg ctrl
8:78806007+	U2OS_1	0	neg ctrl
8:90176006-	U2OS_1	0	neg ctrl
9:26999007+	U2OS_1	0	neg ctrl
11:79029007+	G16385.NCI-H661	1883	neotel
2:23817466+	G16385.NCI-H661	1165	neotel
9:19939236-	G16396.NCI-H526	1868.83	neotel
10:45047006-	U2OS_1	0	neotel
11:110666007+	U2OS_1	4287.18	neotel
11:43021006-	U2OS_1	2291.74	neotel
11:75958007+	U2OS_1	5686.5	neotel
12:111146007+	U2OS_1	1858.18	neotel
12:66827006-	U2OS_1	1943	neotel
12:7827007+	U2OS_1	3342.31	neotel
14:77853006-	U2OS_1	2927	neotel
15:35058006-	U2OS_1	2768.4	neotel
17:16888007+	U2OS_1	573.5	neotel
17:67873007+	U2OS_1	1101	neotel
18:19574007+	U2OS_1	3534.56	neotel
18:56884007+	U2OS_1	0	neotel
19:58909006-	U2OS_1	929	neotel
1:248843006-	U2OS_1	2465.5	neotel
1:52294007+	U2OS_1	1023	neotel
20:42206007+	U2OS_1	5349.4	neotel
21:36818006-	U2OS_1	2099.75	neotel
2:82756006-	U2OS_1	3749	neotel
3:87995007+	U2OS_1	0	neotel
4:111739007+	U2OS_1	1714.5	neotel
4:33715006-	U2OS_1	0	neotel
6:26601007+	U2OS_1	1857	neotel
7:24342007+	U2OS_1	2958	neotel
8:30325007+	U2OS_1	3121	neotel
9:112121006-	U2OS_1	0	neotel
X:102575006-	U2OS_1	678	neotel
X:37719007+	U2OS_1	2000.44	neotel

## Sheet: 3J
column.name	row.name	x	n.total	n.pos	frac	ci.lower	ci.upper
atrx.lowexp	grtr_pos	FALSE	508	57	0.112205	0.0867448	0.143692
atrx.lowexp	grtr_pos	TRUE	32	12	0.375	0.216642	0.562504
tert.lowexp	grtr_pos	FALSE	465	41	0.088172	0.0647327	0.118638
tert.lowexp	grtr_pos	TRUE	75	28	0.373333	0.266594	0.493148
atrx.mut	grtr_pos	FALSE	1097	153	0.139471	0.119799	0.161715
atrx.mut	grtr_pos	TRUE	72	26	0.361111	0.253664	0.483485
tert.or.atrx	grtr_pos	FALSE	413	30	0.0726392	0.0503414	0.103188
tert.or.atrx	grtr_pos	TRUE	152	45	0.296053	0.226248	0.376361

## Sheet: 3K
name	method	p	estimate	ci.lower	ci.upper	effect	tumor_type_final	type	p.adj	log.odds	log.p	label	color
ESAD	Negative Binomial(0.6416)	0.0881	0.703692	0.469892	1.05382	0.704 [0.47-1.05]	ESAD	CRTR	1	-0.506983	1.05502		gray
GBM	Negative Binomial(0.6414)	0.0745	0.164057	0.0225124	1.19555	0.164 [0.0225-1.2]	GBM	CRTR	1	-2.60773	1.12784		gray
OV	Negative Binomial(0.6281)	0.627	0.835712	0.405514	1.72229	0.836 [0.406-1.72]	OV	CRTR	1	-0.258923	0.202732		gray
LUSC	Negative Binomial(0.6272)	0.57	0.771322	0.314798	1.8899	0.771 [0.315-1.89]	LUSC	CRTR	1	-0.374594	0.244125		gray
LUAD	Negative Binomial(0.6266)	0.921	0.958485	0.413713	2.22061	0.958 [0.414-2.22]	LUAD	CRTR	1	-0.0611724	0.0357404		gray
COAD	Negative Binomial(0.631)	0.0714	0.254077	0.0573038	1.12654	0.254 [0.0573-1.13]	COAD	CRTR	1	-1.97666	1.1463		gray
AML	Negative Binomial(0.6254)	1	1.01567e-11	0	Inf	1.02e-11 [0-Inf]	AML	CRTR	1	-36.5188	0		gray
KIRC	Negative Binomial(0.6264)	0.996	1.00499	0.133212	7.582	1 [0.133-7.58]	KIRC	CRTR	1	0.00718825	0.00174066		gray
HNSC	Negative Binomial(0.628)	0.682	0.847393	0.383864	1.87065	0.847 [0.384-1.87]	HNSC	CRTR	1	-0.238896	0.166216		gray
MALY	Negative Binomial(0.6264)	0.948	1.02674	0.4653	2.26561	1.03 [0.465-2.27]	MALY	CRTR	1	0.038065	0.0231917		gray
STAD	Negative Binomial(0.6278)	0.38	0.556949	0.150627	2.05934	0.557 [0.151-2.06]	STAD	CRTR	1	-0.844383	0.420216		gray
LIHC	Negative Binomial(0.6295)	0.245	1.49735	0.758365	2.95646	1.5 [0.758-2.96]	LIHC	CRTR	1	0.582416	0.610834		gray
LGG	Negative Binomial(0.639)	0.198	1.87067	0.72101	4.8535	1.87 [0.721-4.85]	LGG	CRTR	1	0.903558	0.703335		gray
PRAD	Negative Binomial(0.6417)	0.0432	0.220733	0.0510221	0.954941	0.221 [0.051-0.955]	PRAD	CRTR	1	-2.17963	1.36452		gray
KICH	Negative Binomial(0.6466)	0.00418	5.06112	1.66832	15.3537	5.06 [1.67-15.4]	KICH	CRTR	0.17556	2.33946	2.37882		gray
BRCA	Negative Binomial(0.665)	0.00789	0.481435	0.280752	0.825568	0.481 [0.281-0.826]	BRCA	CRTR	0.33138	-1.05459	2.10292		gray
UCEC	Negative Binomial(0.6301)	0.361	0.592691	0.193136	1.81883	0.593 [0.193-1.82]	UCEC	CRTR	1	-0.754649	0.442493		gray
BLCA	Negative Binomial(0.6347)	0.198	0.36772	0.0802793	1.68434	0.368 [0.0803-1.68]	BLCA	CRTR	1	-1.44332	0.703335		gray
CESC	Negative Binomial(0.6258)	0.563	0.626935	0.12865	3.05516	0.627 [0.129-3.06]	CESC	CRTR	1	-0.673612	0.249492		gray
MELA	Negative Binomial(0.6358)	0.00401	1.73751	1.19259	2.5314	1.74 [1.19-2.53]	MELA	CRTR	0.16842	0.797018	2.39686		gray
SARC	Negative Binomial(0.9819)	1.12e-09	4.65515	2.83808	7.63559	4.66 [2.84-7.64]	SARC	CRTR	4.704e-08	2.21883	8.95078	SARC	red
ESAD	Negative Binomial(0.1446)	0.547	0.856175	0.516717	1.41864	0.856 [0.517-1.42]	ESAD	GRTR	1	-0.224022	0.262013		gray
GBM	Negative Binomial(0.1443)	0.531	1.41009	0.480561	4.13756	1.41 [0.481-4.14]	GBM	GRTR	1	0.495787	0.274905		gray
OV	Negative Binomial(0.1507)	0.00329	0.10101	0.021905	0.465788	0.101 [0.0219-0.466]	OV	GRTR	0.13818	-3.30743	2.4828		gray
LUSC	Negative Binomial(0.1448)	0.376	0.598505	0.192194	1.86379	0.599 [0.192-1.86]	LUSC	GRTR	1	-0.740564	0.424812		gray
LUAD	Negative Binomial(0.1475)	0.0153	0.16447	0.0382209	0.707743	0.164 [0.0382-0.708]	LUAD	GRTR	0.6426	-2.6041	1.81531		gray
COAD	Negative Binomial(0.1455)	0.219	0.488558	0.156082	1.52925	0.489 [0.156-1.53]	COAD	GRTR	1	-1.0334	0.659556		gray
AML	Negative Binomial(0.1445)	1	3.45464e-11	0	Inf	3.45e-11 [0-Inf]	AML	GRTR	1	-34.7527	0		gray
KIRC	Negative Binomial(0.1449)	1	1.99681e-11	0	Inf	2e-11 [0-Inf]	KIRC	GRTR	1	-35.5435	0		gray
HNSC	Negative Binomial(0.1457)	0.142	0.45805	0.161469	1.29938	0.458 [0.161-1.3]	HNSC	GRTR	1	-1.12642	0.847712		gray
MALY	Negative Binomial(0.1457)	0.0902	0.403814	0.141443	1.15287	0.404 [0.141-1.15]	MALY	GRTR	1	-1.30824	1.04479		gray
STAD	Negative Binomial(0.1464)	0.0675	0.110826	0.0104831	1.17163	0.111 [0.0105-1.17]	STAD	GRTR	1	-3.17363	1.1707		gray
LIHC	Negative Binomial(0.1442)	0.943	0.966033	0.373134	2.50103	0.966 [0.373-2.5]	LIHC	GRTR	1	-0.049856	0.0254883		gray
LGG	Negative Binomial(0.1682)	2.5e-06	9.75613	3.77979	25.1818	9.76 [3.78-25.2]	LGG	GRTR	0.000105	3.28631	5.60206	LGG	red
PRAD	Negative Binomial(0.1484)	0.019	0.0834558	0.0104817	0.664482	0.0835 [0.0105-0.664]	PRAD	GRTR	0.798	-3.58284	1.72125		gray
KICH	Negative Binomial(0.148)	0.0852	3.94395	0.826684	18.8158	3.94 [0.827-18.8]	KICH	GRTR	1	1.97964	1.06956		gray
BRCA	Negative Binomial(0.1662)	4.95e-08	0.0652127	0.0244433	0.173982	0.0652 [0.0244-0.174]	BRCA	GRTR	2.079e-06	-3.9387	7.30539	BRCA	red
UCEC	Negative Binomial(0.1479)	0.0243	0.0777158	0.00841686	0.717577	0.0777 [0.00842-0.718]	UCEC	GRTR	1	-3.68565	1.61439		gray
BLCA	Negative Binomial(0.1461)	0.0987	0.225433	0.0384616	1.32132	0.225 [0.0385-1.32]	BLCA	GRTR	1	-2.14923	1.00568		gray
CESC	Negative Binomial(0.1445)	0.644	0.672878	0.125546	3.60637	0.673 [0.126-3.61]	CESC	GRTR	1	-0.571582	0.191114		gray
MELA	Negative Binomial(0.1443)	0.957	1.01492	0.589901	1.74617	1.01 [0.59-1.75]	MELA	GRTR	1	0.0213695	0.0190881		gray
SARC	Negative Binomial(0.1998)	5.54e-09	10.671	4.81429	23.6524	10.7 [4.81-23.7]	SARC	GRTR	2.3268e-07	3.41562	8.25649	SARC	red

## Sheet: 3L
name	method	p	estimate	ci.lower	ci.upper	effect	event.type	type	p.adj	log.odds	log.p	label	color
bfbTRUE	poisson	0.339	0.846135	0.600857	1.19154	0.846 [0.601-1.19]	bfb	CRTR	0.530909	-0.24104	0.4698		gray
chromoplexyTRUE	poisson	0.485	1.1218	0.812696	1.54848	1.12 [0.813-1.55]	chromoplexy	CRTR	0.603077	0.165818	0.314258		gray
chromothripsisTRUE	poisson	0.115	1.24519	0.947926	1.63567	1.25 [0.948-1.64]	chromothripsis	CRTR	0.306667	0.316365	0.939302		gray
cpxdmTRUE	poisson	0.49	0.747227	0.326659	1.70927	0.747 [0.327-1.71]	cpxdm	CRTR	0.603077	-0.420381	0.309804		gray
tyfonasTRUE	poisson	0.256	0.783155	0.513569	1.19425	0.783 [0.514-1.19]	tyfonas	CRTR	0.512	-0.352631	0.59176		gray
dmTRUE	poisson	0.735	1.05935	0.758165	1.48018	1.06 [0.758-1.48]	dm	CRTR	0.735	0.0831793	0.133713		gray
pyrgoTRUE	poisson	0.0677	0.694936	0.470284	1.0269	0.695 [0.47-1.03]	pyrgo	CRTR	0.21664	-0.525048	1.16941		gray
rigmaTRUE	poisson	0.156	0.77875	0.55119	1.10026	0.779 [0.551-1.1]	rigma	CRTR	0.356571	-0.360768	0.806875		gray
bfbTRUE	poisson	0.365	1.13411	0.864012	1.48866	1.13 [0.864-1.49]	bfb	GRTR	0.530909	0.181567	0.437707		gray
chromoplexyTRUE	poisson	0.364	0.888968	0.689395	1.14632	0.889 [0.689-1.15]	chromoplexy	GRTR	0.530909	-0.169796	0.438899		gray
chromothripsisTRUE	poisson	2.26e-11	1.97611	1.61853	2.41269	1.98 [1.62-2.41]	chromothripsis	GRTR	3.616e-10	0.982662	10.6459	chromothripsis	red
cpxdmTRUE	poisson	0.535	0.850807	0.510553	1.41782	0.851 [0.511-1.42]	cpxdm	GRTR	0.611429	-0.233096	0.271646		gray
tyfonasTRUE	poisson	0.000973	0.591755	0.433242	0.808264	0.592 [0.433-0.808]	tyfonas	GRTR	0.00518933	-0.756928	3.01189	tyfonas	red
dmTRUE	poisson	0.00432	0.654197	0.488816	0.875532	0.654 [0.489-0.876]	dm	GRTR	0.01728	-0.612202	2.36452	dm	red
pyrgoTRUE	poisson	0.722	1.05355	0.790233	1.40462	1.05 [0.79-1.4]	pyrgo	GRTR	0.735	0.0752626	0.141463		gray
rigmaTRUE	poisson	0.000741	0.615167	0.463891	0.815775	0.615 [0.464-0.816]	rigma	GRTR	0.00518933	-0.700951	3.13018	rigma	red
