# Supplementary material for: Most large structural variants in cancer genomes can be detected without long reads
Source: Nat Genet. 2023 Nov 9;55(12):2139–48. doi: 10.1038/s41588-023-01540-6 (PMC10703688; doi:10.1038/s41588-023-01540-6)
Supplement: Supplementary file 6 — Statistical source data for Fig. 4. [file 41588_2023_1540_MOESM6_ESM.xlsx]

## Sheet: 4C
width.kbp	type	type.level
21118.7	cnloh	cnloh
143.624	cnloh	cnloh
20230.5	cnloh	cnloh
39600.8	cnloh	cnloh
8105.35	cnloh	cnloh
117.134	cnloh	cnloh
13081.7	cnloh	cnloh
15302.8	cnloh	cnloh
33325	cnloh	cnloh
19758.2	cnloh	cnloh
4677.37	cnloh	cnloh
71037.8	cnloh	cnloh
78985.6	cnloh	cnloh
110916	cnloh	cnloh
47035.8	cnloh	cnloh
33671.3	cnloh	cnloh
3015.14	cnloh	cnloh
67385.2	cnloh	cnloh
113379	cnloh	cnloh
22394.5	cnloh	cnloh
16192	cnloh	cnloh
2430.91	cnloh	cnloh
17936.9	cnloh	cnloh
11830.2	cnloh	cnloh
19287.4	cnloh	cnloh
12411.8	cnloh	cnloh
19365	cnloh	cnloh
29010.4	cnloh	cnloh
87472.9	cnloh	cnloh
1366.5	cnloh	cnloh
16439.9	cnloh	cnloh
93109.7	cnloh	cnloh
12789.9	cnloh	cnloh
7868.81	cnloh	cnloh
11823.1	cnloh	cnloh
1767.97	cnloh	cnloh
15710.9	cnloh	cnloh
19231.3	cnloh	cnloh
23263.7	cnloh	cnloh
25343.4	cnloh	cnloh
36794.5	cnloh	cnloh
26467.9	cnloh	cnloh
25829.7	cnloh	cnloh
32344.1	cnloh	cnloh
31339.9	cnloh	cnloh
108873	cnloh	cnloh
59131.5	cnloh	cnloh
5598.66	cnloh	cnloh
35705.7	cnloh	cnloh
43637.3	cnloh	cnloh
46723.6	cnloh	cnloh
70360.6	cnloh	cnloh
48129.9	cnloh	cnloh
30700.9	cnloh	cnloh
43234.3	cnloh	cnloh
8647.93	cnloh	cnloh
52529.5	cnloh	cnloh
81944.5	cnloh	cnloh
43363.5	cnloh	cnloh
4147.44	cnloh	cnloh
19444.2	cnloh	cnloh
128766	cnloh	cnloh
33376.6	cnloh	cnloh
80678.1	cnloh	cnloh
102055	cnloh	cnloh
18879.8	cnloh	cnloh
23781.1	cnloh	cnloh
56938.5	cnloh	cnloh
140589	cnloh	cnloh
28363.9	cnloh	cnloh
28363.9	cnloh	cnloh
1451.2	cnloh	cnloh
131418	cnloh	cnloh
128568	cnloh	cnloh
70175.7	cnloh	cnloh
131422	cnloh	cnloh
43736.4	cnloh	cnloh
20456.5	cnloh	cnloh
35575.5	cnloh	cnloh
21597.3	cnloh	cnloh
145382	cnloh	cnloh
568.015	cnloh	cnloh
8873.66	cnloh	cnloh
84448.8	cnloh	cnloh
11023.2	cnloh	cnloh
34257	cnloh	cnloh
30018.7	cnloh	cnloh
50099.4	cnloh	cnloh
39791.5	cnloh	cnloh
19779	cnloh	cnloh
13626.3	cnloh	cnloh
80689.1	cnloh	cnloh
32966.7	cnloh	cnloh
26146.6	cnloh	cnloh
30727.2	cnloh	cnloh
26.091	cnloh	cnloh
59652.9	cnloh	cnloh
2572.84	cnloh	cnloh
37793.7	cnloh	cnloh
54219.3	cnloh	cnloh
8460.28	cnloh	cnloh
17691.8	cnloh	cnloh
5671.69	cnloh	cnloh
20188.4	cnloh	cnloh
38180.3	cnloh	cnloh
20936.3	cnloh	cnloh
5796.76	cnloh	cnloh
3458.68	cnloh	cnloh
31633.1	cnloh	cnloh
22978	cnloh	cnloh
53125.6	cnloh	cnloh
19604.5	cnloh	cnloh
12323.5	cnloh	cnloh
34221.7	cnloh	cnloh
40398.1	cnloh	cnloh
6763.14	cnloh	cnloh
58311.9	cnloh	cnloh
5589.62	cnloh	cnloh
92666.9	cnloh	cnloh
9422.62	cnloh	cnloh
11015.4	cnloh	cnloh
27392.6	cnloh	cnloh
38951	cnloh	cnloh
33836.5	cnloh	cnloh
4483.99	cnloh	cnloh
536.149	cnloh	cnloh
3369.24	cnloh	cnloh
23249	cnloh	cnloh
1220.03	cnloh	cnloh
42672.4	cnloh	cnloh
10809.1	cnloh	cnloh
11984.2	cnloh	cnloh
43599.6	cnloh	cnloh
28209.3	cnloh	cnloh
56133.1	cnloh	cnloh
271.083	cnloh	cnloh
51989.6	cnloh	cnloh
19208.4	cnloh	cnloh
565.397	cnloh	cnloh
17698.7	cnloh	cnloh
360.816	cnloh	cnloh
37879	cnloh	cnloh
12635.1	cnloh	cnloh
23250.7	cnloh	cnloh
103827	cnloh	cnloh
43716	cnloh	cnloh
131329	cnloh	cnloh
67290.2	cnloh	cnloh
237890	cnloh	cnloh
16169	cnloh	cnloh
60403.2	cnloh	cnloh
25545.2	cnloh	cnloh
44166.1	cnloh	cnloh
79499.2	cnloh	cnloh
37021.2	cnloh	cnloh
31647.2	cnloh	cnloh
44197.6	cnloh	cnloh
7029.13	cnloh	cnloh
4135.36	cnloh	cnloh
17614.1	cnloh	cnloh
43109.8	cnloh	cnloh
10623.3	cnloh	cnloh
58410.3	cnloh	cnloh
22464	cnloh	cnloh
1049.83	cnloh	cnloh
106351	cnloh	cnloh
22463.9	cnloh	cnloh
43492.6	cnloh	cnloh
29.147	cnloh	cnloh
3934.03	cnloh	cnloh
15419.1	cnloh	cnloh
9283.2	cnloh	cnloh
13808.3	cnloh	cnloh
2101.21	cnloh	cnloh
17496.3	cnloh	cnloh
43146.7	cnloh	cnloh
16056.4	cnloh	cnloh
36485.2	cnloh	cnloh
22652	cnloh	cnloh
145676	cnloh	cnloh
94270.5	cnloh	cnloh
70173.3	cnloh	cnloh
134828	cnloh	cnloh
9633.01	cnloh	cnloh
35758.6	cnloh	cnloh
9633.01	cnloh	cnloh
2225.7	cnloh	cnloh
68053.9	cnloh	cnloh
40059	cnloh	cnloh
914.495	cnloh	cnloh
8230.45	cnloh	cnloh
19996.4	cnloh	cnloh
103692	cnloh	cnloh
47004	cnloh	cnloh
95937	cnloh	cnloh
11163	cnloh	cnloh
14732.9	cnloh	cnloh
4956.25	cnloh	cnloh
4956.25	cnloh	cnloh
8132.76	cnloh	cnloh
39779.7	cnloh	cnloh
52925.3	cnloh	cnloh
44239.7	cnloh	cnloh
21504.9	cnloh	cnloh
25035.5	cnloh	cnloh
10303.1	cnloh	cnloh
32044.1	cnloh	cnloh
662.569	cnloh	cnloh
10457	cnloh	cnloh
8225.98	cnloh	cnloh
25342.5	cnloh	cnloh
4475.6	cnloh	cnloh
10250	cnloh	cnloh
25063.2	cnloh	cnloh
105644	cnloh	cnloh
34197.5	cnloh	cnloh
44458.6	cnloh	cnloh
30973.6	cnloh	cnloh
25576.3	cnloh	cnloh
8046.46	cnloh	cnloh
103833	cnloh	cnloh
18880.3	cnloh	cnloh
71040.2	cnloh	cnloh
18064.7	cnloh	cnloh
34198	cnloh	cnloh
41083.4	cnloh	cnloh
25392.2	cnloh	cnloh
20858.2	cnloh	cnloh
8668.73	cnloh	cnloh
16223.1	cnloh	cnloh
33971.6	cnloh	cnloh
59379.5	cnloh	cnloh
103715	cnloh	cnloh
14396.5	cnloh	cnloh
37343.1	cnloh	cnloh
15322.6	cnloh	cnloh
21801.6	cnloh	cnloh
32137.1	cnloh	cnloh
32137.1	cnloh	cnloh
3792.36	cnloh	cnloh
9174.44	cnloh	cnloh
83622.1	cnloh	cnloh
70173.3	cnloh	cnloh
4347.71	cnloh	cnloh
17490.9	cnloh	cnloh
41998.9	cnloh	cnloh
61407.2	cnloh	cnloh
18156.1	cnloh	cnloh
68332.4	cnloh	cnloh
10516.4	cnloh	cnloh
4275.23	cnloh	cnloh
34188.4	cnloh	cnloh
42751.4	cnloh	cnloh
40539.2	cnloh	cnloh
44672.1	cnloh	cnloh
70123.7	cnloh	cnloh
23380.3	cnloh	cnloh
2554.66	cnloh	cnloh
208.277	cnloh	cnloh
123.507	cnloh	cnloh
34054.8	cnloh	cnloh
34054.8	cnloh	cnloh
34054.8	cnloh	cnloh
8220.33	cnloh	cnloh
14539.9	cnloh	cnloh
4338.61	cnloh	cnloh
11324.7	cnloh	cnloh
20028.6	cnloh	cnloh
27815.1	cnloh	cnloh
56462.2	cnloh	cnloh
139888	cnloh	cnloh
91193.9	cnloh	cnloh
49202.8	cnloh	cnloh
57611.1	cnloh	cnloh
94107.5	cnloh	cnloh
62194	cnloh	cnloh
20565	cnloh	cnloh
71037.8	cnloh	cnloh
80579.8	cnloh	cnloh
60959.3	cnloh	cnloh
70141.5	cnloh	cnloh
94031.7	cnloh	cnloh
69361.4	cnloh	cnloh
138401	cnloh	cnloh
92611.8	cnloh	cnloh
81956.5	cnloh	cnloh
58834.2	cnloh	cnloh
36292.7	cnloh	cnloh
98106.6	cnloh	cnloh
85537.2	cnloh	cnloh
6555.92	cnloh	cnloh
25031	cnloh	cnloh
54409.2	cnloh	cnloh
551.975	cnloh	cnloh
18570.2	cnloh	cnloh
18427.8	cnloh	cnloh
171.408	cnloh	cnloh
65846.2	cnloh	cnloh
867.68	cnloh	cnloh
7367.68	cnloh	cnloh
34378.6	cnloh	cnloh
7999.59	cnloh	cnloh
320.843	cnloh	cnloh
43078.1	cnloh	cnloh
12610.7	cnloh	cnloh
104354	cnloh	cnloh
3748.42	cnloh	cnloh
99252.1	cnloh	cnloh
39512.6	cnloh	cnloh
58940.9	cnloh	cnloh
40323.8	cnloh	cnloh
25337.8	cnloh	cnloh
52987	cnloh	cnloh
16056	cnloh	cnloh
15841.9	cnloh	cnloh
104349	cnloh	cnloh
6931.55	cnloh	cnloh
88276.1	cnloh	cnloh
37358	cnloh	cnloh
11682.1	cnloh	cnloh
4605.25	cnloh	cnloh
229.353	cnloh	cnloh
10666	cnloh	cnloh
357.384	cnloh	cnloh
15023.5	cnloh	cnloh
47486.9	cnloh	cnloh
8467.21	cnloh	cnloh
67572.3	cnloh	cnloh
17759.4	cnloh	cnloh
13001.3	cnloh	cnloh
29687.7	cnloh	cnloh
5455.73	cnloh	cnloh
21917.2	cnloh	cnloh
30200.1	cnloh	cnloh
144896	cnloh	cnloh
19657.5	cnloh	cnloh
46042.2	cnloh	cnloh
131373	cnloh	cnloh
5667.23	cnloh	cnloh
572.247	cnloh	cnloh
24611.9	cnloh	cnloh
112339	cnloh	cnloh
20522.4	cnloh	cnloh
19674.9	cnloh	cnloh
146808	cnloh	cnloh
17819.3	cnloh	cnloh
19287.4	cnloh	cnloh
18261	cnloh	cnloh
99248.9	cnloh	cnloh
25440.7	cnloh	cnloh
31429	cnloh	cnloh
18089.2	cnloh	cnloh
62275.9	cnloh	cnloh
25359.9	cnloh	cnloh
7506.37	cnloh	cnloh
39967.4	cnloh	cnloh
50363	cnloh	cnloh
38771.5	cnloh	cnloh
7248.29	cnloh	cnloh
3148.72	cnloh	cnloh
41406	cnloh	cnloh
57216.7	cnloh	cnloh
52848.8	cnloh	cnloh
44079.5	cnloh	cnloh
20140	cnloh	cnloh
107549	cnloh	cnloh
39227	cnloh	cnloh
1620.25	cnloh	cnloh
876.929	cnloh	cnloh
124.887	cnloh	cnloh
1349.43	cnloh	cnloh
90.353	cnloh	cnloh
2023.44	cnloh	cnloh
236.163	cnloh	cnloh
657.505	cnloh	cnloh
483.451	cnloh	cnloh
194.078	cnloh	cnloh
112.01	cnloh	cnloh
2441.67	cnloh	cnloh
118.54	cnloh	cnloh
8293.87	cnloh	cnloh
182.327	cnloh	cnloh
2248.25	cnloh	cnloh
244.394	cnloh	cnloh
47.087	cnloh	cnloh
58.152	cnloh	cnloh
9852.58	cnloh	cnloh
50.394	cnloh	cnloh
437.419	cnloh	cnloh
1007.43	cnloh	cnloh
562.652	cnloh	cnloh
494.513	cnloh	cnloh
1215.51	cnloh	cnloh
194.163	cnloh	cnloh
71.295	cnloh	cnloh
461.004	cnloh	cnloh
271.969	cnloh	cnloh
682.977	cnloh	cnloh
470.704	cnloh	cnloh
151.064	cnloh	cnloh
33.831	cnloh	cnloh
921.622	cnloh	cnloh
286.067	cnloh	cnloh
1527.82	cnloh	cnloh
588.91	cnloh	cnloh
75.655	cnloh	cnloh
420.924	cnloh	cnloh
500.537	cnloh	cnloh
26.129	cnloh	cnloh
1000.42	cnloh	cnloh
4937.01	cnloh	cnloh
1489.8	cnloh	cnloh
711.932	cnloh	cnloh
105.828	cnloh	cnloh
154.952	cnloh	cnloh
92.856	cnloh	cnloh
64.225	cnloh	cnloh
246.54	cnloh	cnloh
836.948	cnloh	cnloh
870.14	cnloh	cnloh
117.074	cnloh	cnloh
125.049	cnloh	cnloh
251.846	cnloh	cnloh
139.057	cnloh	cnloh
350.551	cnloh	cnloh
812.546	cnloh	cnloh
469.828	cnloh	cnloh
1593.82	cnloh	cnloh
798.285	cnloh	cnloh
590.15	cnloh	cnloh
1611.46	cnloh	cnloh
1387.33	cnloh	cnloh
1682.81	cnloh	cnloh
133.626	cnloh	cnloh
626.622	cnloh	cnloh
1483.81	cnloh	cnloh
676.479	cnloh	cnloh
277.844	cnloh	cnloh
2699.03	cnloh	cnloh
59.439	cnloh	cnloh
1437.22	cnloh	cnloh
96.342	cnloh	cnloh
958.713	cnloh	cnloh
118.59	cnloh	cnloh
25.601	cnloh	cnloh
121.118	cnloh	cnloh
755.609	cnloh	cnloh
217.567	cnloh	cnloh
298.737	cnloh	cnloh
61.914	cnloh	cnloh
956.523	cnloh	cnloh
604.241	cnloh	cnloh
4657.24	cnloh	cnloh
179.578	cnloh	cnloh
106.283	cnloh	cnloh
154.481	cnloh	cnloh
49423	cnloh	cnloh
18006.7	cnloh	cnloh
1835.37	cnloh	cnloh
25497.2	cnloh	cnloh
11330.9	cnloh	cnloh
51093.7	cnloh	cnloh
60815.6	cnloh	cnloh
71526.7	cnloh	cnloh
768.89	cnloh	cnloh
9372.1	cnloh	cnloh
53516.2	cnloh	cnloh
12627.5	cnloh	cnloh
44302.3	cnloh	cnloh
70399.1	cnloh	cnloh
15840.8	cnloh	cnloh
74827.7	cnloh	cnloh
6965.31	cnloh	cnloh
22970.1	cnloh	cnloh
7887.29	cnloh	cnloh
13951.4	cnloh	cnloh
5750.12	cnloh	cnloh
11481.1	cnloh	cnloh
94331.4	cnloh	cnloh
13409.6	cnloh	cnloh
145395	cnloh	cnloh
4060.22	cnloh	cnloh
7049.81	cnloh	cnloh
66986.3	cnloh	cnloh
144896	cnloh	cnloh
103775	cnloh	cnloh
12949.6	cnloh	cnloh
21709.2	cnloh	cnloh
48320.7	cnloh	cnloh
574.204	cnloh	cnloh
70695.4	cnloh	cnloh
15893.7	cnloh	cnloh
46868.2	cnloh	cnloh
25072.5	cnloh	cnloh
21534.2	cnloh	cnloh
17472.9	cnloh	cnloh
1257.43	cnloh	cnloh
14072.7	cnloh	cnloh
8138.67	cnloh	cnloh
72846.4	cnloh	cnloh
268.658	cnloh	cnloh
70896.1	cnloh	cnloh
6564.38	cnloh	cnloh
21206.1	cnloh	cnloh
95922.3	cnloh	cnloh
102183	cnloh	cnloh
21716.9	cnloh	cnloh
90452.2	cnloh	cnloh
21718.2	cnloh	cnloh
104450	cnloh	cnloh
20948.7	cnloh	cnloh
11218.4	cnloh	cnloh
1710.56	cnloh	cnloh
68332.4	cnloh	cnloh
50442.8	cnloh	cnloh
2499.12	cnloh	cnloh
84.264	cnloh	cnloh
1599.61	cnloh	cnloh
68332.4	cnloh	cnloh
39990.2	cnloh	cnloh
7920.22	cnloh	cnloh
20860.9	cnloh	cnloh
32500.7	cnloh	cnloh
10307.1	cnloh	cnloh
10539.9	cnloh	cnloh
18120.6	cnloh	cnloh
42836	cnloh	cnloh
19314.6	cnloh	cnloh
61124.9	cnloh	cnloh
61225.5	cnloh	cnloh
2555.09	cnloh	cnloh
71037.8	cnloh	cnloh
25606.4	cnloh	cnloh
16844.9	cnloh	cnloh
28649.4	cnloh	cnloh
43672.7	cnloh	cnloh
20654.1	cnloh	cnloh
57190.4	cnloh	cnloh
63391.1	cnloh	cnloh
50690.5	cnloh	cnloh
9222.31	cnloh	cnloh
4706.26	cnloh	cnloh
137517	cnloh	cnloh
6902.85	cnloh	cnloh
2709.46	cnloh	cnloh
41359.4	upd	upd
21118.7	upd	upd
143.624	upd	upd
155271	upd	upd
21700.7	upd	upd
701.459	upd	upd
585.877	upd	upd
0.478	upd	upd
1053.33	upd	upd
1863.39	upd	upd
77.98	upd	upd
0.133	upd	upd
3339.71	upd	upd
621.887	upd	upd
47.477	upd	upd
21.768	upd	upd
72.613	upd	upd
391.306	upd	upd
3.506	upd	upd
0.079	upd	upd
160.864	upd	upd
276.931	upd	upd
326.861	upd	upd
360.974	upd	upd
875.414	upd	upd
28.299	upd	upd
13.082	upd	upd
3.743	upd	upd
9.331	upd	upd
137.849	upd	upd
4.326	upd	upd
55.125	upd	upd
0.02	upd	upd
1.948	upd	upd
2.214	upd	upd
117.493	upd	upd
64165.2	upd	upd
71284.6	upd	upd
787.263	upd	upd
6.871	upd	upd
604.86	upd	upd
35.636	upd	upd
589.19	upd	upd
7781.63	upd	upd
131.154	upd	upd
404.714	upd	upd
379.29	upd	upd
8.067	upd	upd
569.894	upd	upd
9908.01	upd	upd
10619.6	upd	upd
1757.68	upd	upd
9.997	upd	upd
20.172	upd	upd
119.247	upd	upd
1740.63	upd	upd
1556.98	upd	upd
1.224	upd	upd
0.235	upd	upd
426.505	upd	upd
20230.5	upd	upd
557.25	upd	upd
35.24	upd	upd
45.613	upd	upd
125.854	upd	upd
37.902	upd	upd
66.849	upd	upd
625.134	upd	upd
322.741	upd	upd
115.714	upd	upd
155.429	upd	upd
335.361	upd	upd
219.414	upd	upd
366.516	upd	upd
438.651	upd	upd
162.305	upd	upd
48.147	upd	upd
72.011	upd	upd
11.569	upd	upd
508.827	upd	upd
138.681	upd	upd
135.09	upd	upd
385.816	upd	upd
42.562	upd	upd
145.979	upd	upd
199.837	upd	upd
76.094	upd	upd
28.477	upd	upd
55.02	upd	upd
1.203	upd	upd
1.787	upd	upd
25830.3	upd	upd
2434.45	upd	upd
13182.5	upd	upd
8.727	upd	upd
0.021	upd	upd
629.613	upd	upd
61.772	upd	upd
39.091	upd	upd
22194	upd	upd
0.074	upd	upd
48.226	upd	upd
55450	upd	upd
6033	upd	upd
4368.12	upd	upd
54051.6	upd	upd
8.73	upd	upd
10465.2	upd	upd
9.477	upd	upd
11105.4	upd	upd
591	upd	upd
29.368	upd	upd
31.384	upd	upd
95.34	upd	upd
8.578	upd	upd
2320.15	upd	upd
2832.62	upd	upd
2981.88	upd	upd
162.035	upd	upd
277.67	upd	upd
1056.78	upd	upd
15647.3	upd	upd
42.133	upd	upd
5.893	upd	upd
0.023	upd	upd
0.001	upd	upd
32704.6	upd	upd
395.52	upd	upd
79.466	upd	upd
124.262	upd	upd
100.362	upd	upd
11407.4	upd	upd
38.363	upd	upd
0.357	upd	upd
13.452	upd	upd
55.253	upd	upd
57064	upd	upd
22511.6	upd	upd
767.007	upd	upd
3205.01	upd	upd
83.474	upd	upd
155271	upd	upd
79.165	upd	upd
41.868	upd	upd
288.778	upd	upd
117.134	upd	upd
403.746	upd	upd
85.59	upd	upd
1.36	upd	upd
30.63	upd	upd
212.402	upd	upd
452.961	upd	upd
80.277	upd	upd
30910.1	upd	upd
34741.6	upd	upd
27272.9	upd	upd
2124.57	upd	upd
115170	upd	upd
41610	upd	upd
35830.3	upd	upd
22356.8	upd	upd
5061.75	upd	upd
78369.3	upd	upd
1669.09	upd	upd
900.463	upd	upd
1540.75	upd	upd
3400.65	upd	upd
3182.74	upd	upd
12616	upd	upd
3043.02	upd	upd
5434.55	upd	upd
1067	upd	upd
33528.9	upd	upd
10592.6	upd	upd
0.086	upd	upd
419.802	upd	upd
1763.68	upd	upd
381.779	upd	upd
11597	upd	upd
1711.74	upd	upd
31649.3	upd	upd
135.181	upd	upd
3769	upd	upd
111.308	upd	upd
12299.3	upd	upd
2700.01	upd	upd
5335.35	upd	upd
104801	upd	upd
9913.08	upd	upd
14.919	upd	upd
6.602	upd	upd
10.87	upd	upd
12445.3	upd	upd
18660.4	upd	upd
3653.48	upd	upd
1.904	upd	upd
6337.06	upd	upd
11480.5	upd	upd
28019.6	upd	upd
8230.85	upd	upd
12414.5	upd	upd
5.799	upd	upd
8903.4	upd	upd
0.27	upd	upd
311.225	upd	upd
1687.51	upd	upd
90354.8	upd	upd
1058.08	upd	upd
40429.2	upd	upd
1961.87	upd	upd
2099.01	upd	upd
43513.8	upd	upd
7719.75	upd	upd
93793.5	upd	upd
85357	upd	upd
3845.47	upd	upd
471.594	upd	upd
1.16	upd	upd
8386	upd	upd
108.553	upd	upd
1043.02	upd	upd
99.565	upd	upd
1258.24	upd	upd
640.936	upd	upd
0.11	upd	upd
37560.4	upd	upd
18.993	upd	upd
13.833	upd	upd
237.049	upd	upd
95.565	upd	upd
22003.1	upd	upd
6686.43	upd	upd
582.886	upd	upd
1066.84	upd	upd
18646.9	upd	upd
247.992	upd	upd
0.391	upd	upd
1.543	upd	upd
3.255	upd	upd
1.697	upd	upd
29424.3	upd	upd
122878	upd	upd
22383.8	upd	upd
0.232	upd	upd
10975.2	upd	upd
6249.9	upd	upd
30918.3	upd	upd
23724.2	upd	upd
19365.7	upd	upd
4156.44	upd	upd
80666.4	upd	upd
9381.86	upd	upd
781.594	upd	upd
3147.86	upd	upd
9166.96	upd	upd
8443.96	upd	upd
9401.78	upd	upd
14464.7	upd	upd
780.87	upd	upd
46672.1	upd	upd
1087.9	upd	upd
8909.13	upd	upd
40293.8	upd	upd
133111	upd	upd
26.253	upd	upd
10576.3	upd	upd
2091.17	upd	upd
3650.74	upd	upd
1299.04	upd	upd
5903.85	upd	upd
5057.16	upd	upd
3260.44	upd	upd
560.597	upd	upd
5979.72	upd	upd
101345	upd	upd
9.296	upd	upd
28644.1	upd	upd
2170.88	upd	upd
2954.61	upd	upd
3499	upd	upd
49126.7	upd	upd
8090.19	upd	upd
18295.6	upd	upd
17.984	upd	upd
20.846	upd	upd
32.512	upd	upd
2444.25	upd	upd
1241.46	upd	upd
68.104	upd	upd
15444.6	upd	upd
10597.7	upd	upd
4.019	upd	upd
13.352	upd	upd
5.128	upd	upd
12857	upd	upd
20364	upd	upd
5.086	upd	upd
102531	upd	upd
2643.51	upd	upd
1645.92	upd	upd
2.692	upd	upd
123.833	upd	upd
1.167	upd	upd
0.064	upd	upd
3360.8	upd	upd
879.287	upd	upd
3043.55	upd	upd
2.339	upd	upd
36.616	upd	upd
1195.96	upd	upd
9506.57	upd	upd
1951.38	upd	upd
201.052	upd	upd
4.219	upd	upd
2301.68	upd	upd
0.317	upd	upd
139.817	upd	upd
1319.57	upd	upd
729.09	upd	upd
472.571	upd	upd
1.737	upd	upd
1805.04	upd	upd
447.659	upd	upd
380.394	upd	upd
2.419	upd	upd
3.173	upd	upd
6.04	upd	upd
1261.2	upd	upd
12295	upd	upd
1085.21	upd	upd
54892.5	upd	upd
6.717	upd	upd
14434.7	upd	upd
8.193	upd	upd
121.191	upd	upd
9826.99	upd	upd
21713.1	upd	upd
7175.93	upd	upd
51304.6	upd	upd
32741.2	upd	upd
27621.1	upd	upd
19790.3	upd	upd
141.449	upd	upd
3372.71	upd	upd
5460	upd	upd
11.218	upd	upd
39881.9	upd	upd
151272	upd	upd
21207.9	upd	upd
61690.2	upd	upd
2017.35	upd	upd
25699.3	upd	upd
44.766	upd	upd
2540.2	upd	upd
2904.11	upd	upd
1014	upd	upd
3001.72	upd	upd
336.029	upd	upd
21913	upd	upd
8497.51	upd	upd
52101.9	upd	upd
43123.1	upd	upd
287.97	upd	upd
31222	upd	upd
13081.7	upd	upd
8233.27	upd	upd
5941	upd	upd
13344	upd	upd
2818.04	upd	upd
7395.73	upd	upd
3202.36	upd	upd
3054.8	upd	upd
47.101	upd	upd
1453.61	upd	upd
2223.1	upd	upd
11876.5	upd	upd
30437.1	upd	upd
33325	upd	upd
817.655	upd	upd
5231.09	upd	upd
11048.3	upd	upd
667.184	upd	upd
7989.01	upd	upd
22955.5	upd	upd
3352.02	upd	upd
7898.01	upd	upd
2.172	upd	upd
737.768	upd	upd
1464	upd	upd
11.556	upd	upd
190.07	upd	upd
430.971	upd	upd
0.994	upd	upd
112.74	upd	upd
4999.98	upd	upd
9618.06	upd	upd
5155.07	upd	upd
899.212	upd	upd
975.596	upd	upd
575.337	upd	upd
837.816	upd	upd
41352	upd	upd
38484.1	upd	upd
11243.5	upd	upd
1385.61	upd	upd
5010.03	upd	upd
1457.9	upd	upd
5.32	upd	upd
11511.1	upd	upd
9.716	upd	upd
11.828	upd	upd
7.435	upd	upd
8099.11	upd	upd
3048.07	upd	upd
29.533	upd	upd
18928.8	upd	upd
0.528	upd	upd
16516.4	upd	upd
3643.76	upd	upd
0.006	upd	upd
8.523	upd	upd
0.341	upd	upd
13528.7	upd	upd
8027.91	upd	upd
5046.9	upd	upd
10188.2	upd	upd
4925.21	upd	upd
21806.2	upd	upd
18910.8	upd	upd
31403.9	upd	upd
15638.1	upd	upd
0.099	upd	upd
4385.02	upd	upd
22112	upd	upd
17064.1	upd	upd
0.455	upd	upd
15593.9	upd	upd
14400.8	upd	upd
4947.49	upd	upd
73.071	upd	upd
46750.7	upd	upd
4607.61	upd	upd
13.449	upd	upd
29.168	upd	upd
14.361	upd	upd
25882	upd	upd
17902.7	upd	upd
7519.82	upd	upd
22107.1	upd	upd
13854	upd	upd
19268.3	upd	upd
113.417	upd	upd
865.552	upd	upd
42.293	upd	upd
32448.4	upd	upd
48461.7	upd	upd
18110.3	upd	upd
41146.7	upd	upd
44142.5	upd	upd
3.062	upd	upd
7015.01	upd	upd
16957.2	upd	upd
20155.6	upd	upd
5105.53	upd	upd
2080.4	upd	upd
10627.3	upd	upd
26256.1	upd	upd
15301.5	upd	upd
1.083	upd	upd
14763.9	upd	upd
5113.2	upd	upd
0.002	upd	upd
7580.49	upd	upd
0.364	upd	upd
26001.5	upd	upd
17.866	upd	upd
14354.9	upd	upd
5304.01	upd	upd
6501	upd	upd
14337.4	upd	upd
8621.08	upd	upd
4268.99	upd	upd
67512.9	upd	upd
30889.2	upd	upd
38638.8	upd	upd
15613.2	upd	upd
437	upd	upd
0.037	upd	upd
385.536	upd	upd
238.621	upd	upd
2392.96	upd	upd
3692.79	upd	upd
4100.96	upd	upd
43962.9	upd	upd
46439.8	upd	upd
2096.53	upd	upd
4626.74	upd	upd
878.615	upd	upd
11153.8	upd	upd
48858.1	upd	upd
8237.53	upd	upd
449.01	upd	upd
3614.71	upd	upd
1816.71	upd	upd
3281.52	upd	upd
66.742	upd	upd
223.696	upd	upd
32130.4	upd	upd
51304.6	upd	upd
8959.01	upd	upd
17853	upd	upd
28275.8	upd	upd
130393	upd	upd
4.583	upd	upd
0.15	upd	upd
11.586	upd	upd
40060.9	upd	upd
165.412	upd	upd
869.564	upd	upd
592.954	upd	upd
166.841	upd	upd
697.871	upd	upd
544.481	upd	upd
15.889	upd	upd
280.741	upd	upd
268.015	upd	upd
6136	upd	upd
26.774	upd	upd
77.466	upd	upd
1.001	upd	upd
79.864	upd	upd
383.776	upd	upd
1906.45	upd	upd
1154.71	upd	upd
39770.4	upd	upd
17785.3	upd	upd
6458.87	upd	upd
17582.6	upd	upd
4356.9	upd	upd
448	upd	upd
38.525	upd	upd
9.948	upd	upd
82566.7	upd	upd
14190.4	upd	upd
1549.4	upd	upd
8558.96	upd	upd
6.612	upd	upd
19746	upd	upd
25342.2	upd	upd
3817.15	upd	upd
44147.1	upd	upd
22085.5	upd	upd
17.337	upd	upd
13.252	upd	upd
24.927	upd	upd
31.389	upd	upd
14.539	upd	upd
33297.8	upd	upd
22.625	upd	upd
27.74	upd	upd
23468.2	upd	upd
7912.91	upd	upd
18463.8	upd	upd
10.824	upd	upd
6.371	upd	upd
8.04	upd	upd
0.425	upd	upd
4718.05	upd	upd
16.962	upd	upd
0.781	upd	upd
7.108	upd	upd
13.283	upd	upd
6.33	upd	upd
11.326	upd	upd
27.047	upd	upd
61.302	upd	upd
34.662	upd	upd
11.909	upd	upd
3509.13	upd	upd
499.886	upd	upd
29245.1	upd	upd
7057.03	upd	upd
19.266	upd	upd
832.023	upd	upd
60.339	upd	upd
2797.96	upd	upd
5874.49	upd	upd
16.926	upd	upd
345.925	upd	upd
287.831	upd	upd
0.891	upd	upd
56.634	upd	upd
21.685	upd	upd
27.023	upd	upd
8.652	upd	upd
65.866	upd	upd
65.948	upd	upd
48.499	upd	upd
14.935	upd	upd
7766.74	upd	upd
36959.3	upd	upd
22093.2	upd	upd
20116.3	upd	upd
0.158	upd	upd
34717	upd	upd
17137.1	upd	upd
19017.7	upd	upd
45029.7	upd	upd
35.717	upd	upd
664.464	upd	upd
1484.43	upd	upd
22526	upd	upd
51304.6	upd	upd
70125	upd	upd
120922	upd	upd
4466.84	upd	upd
180.263	upd	upd
10822.1	upd	upd
4125	upd	upd
104066	upd	upd
12109.6	upd	upd
8616.61	upd	upd
32440.4	upd	upd
8.87	upd	upd
148.657	upd	upd
2744.01	upd	upd
9117	upd	upd
13910	upd	upd
37474.8	upd	upd
7.656	upd	upd
165.349	upd	upd
115170	upd	upd
8329	upd	upd
10761.2	upd	upd
65679.9	upd	upd
17.193	upd	upd
58.696	upd	upd
22194	upd	upd
7729.01	upd	upd
11171.6	upd	upd
58767.8	upd	upd
14803.2	upd	upd
50177.1	upd	upd
31.351	upd	upd
1090.97	upd	upd
88.127	upd	upd
320.365	upd	upd
88.113	upd	upd
12.122	upd	upd
1.415	upd	upd
244.265	upd	upd
46.559	upd	upd
37.17	upd	upd
69.044	upd	upd
816.16	upd	upd
671.15	upd	upd
37.492	upd	upd
12.086	upd	upd
51.894	upd	upd
26.156	upd	upd
117.003	upd	upd
62.127	upd	upd
0.711	upd	upd
416.588	upd	upd
564.695	upd	upd
8.998	upd	upd
5168.2	upd	upd
15384	upd	upd
0.887	upd	upd
20381.1	upd	upd
51495.6	upd	upd
26217.7	upd	upd
6735.87	upd	upd
34662	upd	upd
215.912	upd	upd
196.411	upd	upd
3.96	upd	upd
67.604	upd	upd
17050.6	upd	upd
61916.3	upd	upd
25512	upd	upd
23372.8	upd	upd
1244.08	upd	upd
14545.1	upd	upd
72980.8	upd	upd
8502.02	upd	upd
6054.39	upd	upd
15643.2	upd	upd
108999	upd	upd
2716.97	upd	upd
2.701	upd	upd
2785.4	upd	upd
955.335	upd	upd
533.147	upd	upd
2189.06	upd	upd
1001.07	upd	upd
0.359	upd	upd
2209.74	upd	upd
56777.5	upd	upd
774.491	upd	upd
303.901	upd	upd
36397.5	upd	upd
77817.3	upd	upd
133833	upd	upd
107350	upd	upd
32016	upd	upd
2217	upd	upd
67669.4	upd	upd
78371.4	upd	upd
75.478	upd	upd
11719.4	upd	upd
1286.26	upd	upd
19415.8	upd	upd
19772	upd	upd
10525	upd	upd
24315.3	upd	upd
24512	upd	upd
207.648	upd	upd
207.132	upd	upd
36961.8	upd	upd
51304.6	upd	upd
60166.6	upd	upd
583.006	upd	upd
51616.7	upd	upd
90823	upd	upd
221.61	upd	upd
393.789	upd	upd
277.669	upd	upd
40408.1	upd	upd
36690	upd	upd
9494.27	upd	upd
121820	upd	upd
1558.18	upd	upd
330.755	upd	upd
11545.4	upd	upd
23212.2	upd	upd
9938.49	upd	upd
0.113	upd	upd
9549.05	upd	upd
23761.9	upd	upd
16733.8	upd	upd
1.594	upd	upd
35993.9	upd	upd
22400.3	upd	upd
59.621	upd	upd
33540	upd	upd
3290.55	upd	upd
31741	upd	upd
352.661	upd	upd
265.833	upd	upd
22194	upd	upd
2.313	upd	upd
4091	upd	upd
8862.24	upd	upd
199.186	upd	upd
3.598	upd	upd
115.742	upd	upd
194.762	upd	upd
96.187	upd	upd
10.264	upd	upd
529.251	upd	upd
6606.66	upd	upd
4338.9	upd	upd
347.883	upd	upd
11351.5	upd	upd
23523	upd	upd
27729	upd	upd
119.539	upd	upd
91.955	upd	upd
51.132	upd	upd
105.329	upd	upd
45.012	upd	upd
6685.01	upd	upd
257.311	upd	upd
564.899	upd	upd
32498.6	upd	upd
47035.8	upd	upd
49614	upd	upd
43398.9	upd	upd
30415.3	upd	upd
133852	upd	upd
11.142	upd	upd
107350	upd	upd
73477.5	upd	upd
7696.75	upd	upd
3015.14	upd	upd
67385.2	upd	upd
128206	upd	upd
32601.5	upd	upd
26446.5	upd	upd
49752.6	upd	upd
5538.55	upd	upd
48129.9	upd	upd
51304.6	upd	upd
5.38	upd	upd
108.047	upd	upd
0.271	upd	upd
19.467	upd	upd
49.883	upd	upd
0.079	upd	upd
9305.39	upd	upd
8541.64	upd	upd
15614.3	upd	upd
1028	upd	upd
2.684	upd	upd
35021.6	upd	upd
64103.8	upd	upd
22394.5	upd	upd
44670.3	upd	upd
100.648	upd	upd
66.611	upd	upd
0.024	upd	upd
14.806	upd	upd
11463.8	upd	upd
1138.54	upd	upd
39240.9	upd	upd
10860.2	upd	upd
6145.93	upd	upd
1349.35	upd	upd
4.394	upd	upd
2.873	upd	upd
0.683	upd	upd
8166.94	upd	upd
5817.84	upd	upd
1044.09	upd	upd
58041.7	upd	upd
1.532	upd	upd
0.203	upd	upd
2068.66	upd	upd
5934.94	upd	upd
16276.5	upd	upd
153.607	upd	upd
55.717	upd	upd
33.211	upd	upd
53344.2	upd	upd
42299.8	upd	upd
19323	upd	upd
7407.93	upd	upd
34488.1	upd	upd
800.172	upd	upd
57614.4	upd	upd
102.813	upd	upd
38567.8	upd	upd
19475.8	upd	upd
14213.9	upd	upd
55678	upd	upd
959	upd	upd
36691	upd	upd
63458.5	upd	upd
12092.4	upd	upd
44125	upd	upd
14.263	upd	upd
1384.36	upd	upd
8470.79	upd	upd
5.528	upd	upd
4892.72	upd	upd
216.162	upd	upd
294.979	upd	upd
392.844	upd	upd
41609	upd	upd
54.441	upd	upd
244.58	upd	upd
72.448	upd	upd
210.308	upd	upd
1312.7	upd	upd
3585.81	upd	upd
0.632	upd	upd
24.409	upd	upd
329.641	upd	upd
57.758	upd	upd
104.733	upd	upd
43.358	upd	upd
699.251	upd	upd
1.01	upd	upd
8.418	upd	upd
151.614	upd	upd
1.032	upd	upd
103.119	upd	upd
3014.01	upd	upd
4657	upd	upd
13091.8	upd	upd
16192	upd	upd
3.224	upd	upd
156.39	upd	upd
37259.3	upd	upd
2865.3	upd	upd
22621.6	upd	upd
36556.5	upd	upd
1153.23	upd	upd
48715.2	upd	upd
6871.73	upd	upd
2547.35	upd	upd
50783	upd	upd
7517.26	upd	upd
19894.5	upd	upd
48721.7	upd	upd
1399.98	upd	upd
27.018	upd	upd
1097.83	upd	upd
155.744	upd	upd
1818.46	upd	upd
6615.21	upd	upd
2564.25	upd	upd
8457.3	upd	upd
3604.27	upd	upd
74559.5	upd	upd
28845.8	upd	upd
303.645	upd	upd
7927.69	upd	upd
17922.7	upd	upd
19180.9	upd	upd
0.842	upd	upd
9987.19	upd	upd
0.002	upd	upd
120428	upd	upd
788.22	upd	upd
90.279	upd	upd
44915.8	upd	upd
46402	upd	upd
2477.65	upd	upd
49.806	upd	upd
18875.8	upd	upd
122243	upd	upd
78.984	upd	upd
13818.3	upd	upd
32788.4	upd	upd
54.237	upd	upd
57.544	upd	upd
1144.28	upd	upd
789.992	upd	upd
0.023	upd	upd
249.578	upd	upd
824.511	upd	upd
615.489	upd	upd
40557.7	upd	upd
48093.7	upd	upd
1224.69	upd	upd
5.406	upd	upd
107350	upd	upd
35772.2	upd	upd
7698.6	upd	upd
34.33	upd	upd
56468.7	upd	upd
25341	upd	upd
2.32	upd	upd
0.056	upd	upd
513.17	upd	upd
194.93	upd	upd
93.504	upd	upd
2076	upd	upd
54.982	upd	upd
7.486	upd	upd
21.649	upd	upd
1534.68	upd	upd
71.801	upd	upd
19.089	upd	upd
68523.7	upd	upd
74131.9	upd	upd
16746.1	upd	upd
84881	upd	upd
14999.9	upd	upd
7830.47	upd	upd
0.524	upd	upd
5.88	upd	upd
1319.26	upd	upd
492.954	upd	upd
1.578	upd	upd
43438	upd	upd
49.138	upd	upd
7758.48	upd	upd
20265.6	upd	upd
53033.1	upd	upd
774.015	upd	upd
7985.6	upd	upd
8.583	upd	upd
285.567	upd	upd
15996.5	upd	upd
1.992	upd	upd
283.181	upd	upd
1683.92	upd	upd
113.793	upd	upd
239.747	upd	upd
1139.72	upd	upd
153.898	upd	upd
93025.5	upd	upd
1.819	upd	upd
25653.4	upd	upd
45501	upd	upd
0.277	upd	upd
21335.1	upd	upd
111886	upd	upd
152571	upd	upd
11.183	upd	upd
11.525	upd	upd
36916.7	upd	upd
32.016	upd	upd
4.898	upd	upd
0.046	upd	upd
5734.19	upd	upd
54.976	upd	upd
5.788	upd	upd
30238.9	upd	upd
6796.2	upd	upd
4725.27	upd	upd
1125.92	upd	upd
5.786	upd	upd
1726.4	upd	upd
11100.4	upd	upd
7068.06	upd	upd
0.001	upd	upd
4818.35	upd	upd
1062	upd	upd
318.719	upd	upd
27.549	upd	upd
831.181	upd	upd
174.899	upd	upd
3312.85	upd	upd
0.249	upd	upd
3480.11	upd	upd
1897.36	upd	upd
29.822	upd	upd
0.017	upd	upd
0.015	upd	upd
5.607	upd	upd
6389.65	upd	upd
16.67	upd	upd
0.002	upd	upd
33540.5	upd	upd
7087.26	upd	upd
17544.9	upd	upd
15.623	upd	upd
0.183	upd	upd
57.973	upd	upd
176.596	upd	upd
0.019	upd	upd
28742.6	upd	upd
20283.6	upd	upd
6044.4	upd	upd
0.123	upd	upd
1855.23	upd	upd
13060.2	upd	upd
2832	upd	upd
22241.5	upd	upd
40576.2	upd	upd
87011.4	upd	upd
1.237	upd	upd
43098.7	upd	upd
6062.74	upd	upd
14.234	upd	upd
0.011	upd	upd
42.664	upd	upd
12526.1	upd	upd
51304.6	upd	upd
18328.9	upd	upd
169.742	upd	upd
3011.37	upd	upd
9767.51	upd	upd
65764.2	upd	upd
1766.08	upd	upd
4972.64	upd	upd
14292.6	upd	upd
26.278	upd	upd
8.666	upd	upd
15.786	upd	upd
8771.45	upd	upd
1956.11	upd	upd
27605.9	upd	upd
0.036	upd	upd
14.386	upd	upd
0.168	upd	upd
118.888	upd	upd
5377.01	upd	upd
9.32	upd	upd
4004.72	upd	upd
1670.21	upd	upd
41.721	upd	upd
8.054	upd	upd
5.778	upd	upd
31.521	upd	upd
17132.7	upd	upd
554.302	upd	upd
50.715	upd	upd
492.382	upd	upd
44.909	upd	upd
468.397	upd	upd
15.985	upd	upd
0.237	upd	upd
1095.07	upd	upd
17622.3	upd	upd
260.996	upd	upd
917.592	upd	upd
18.568	upd	upd
2430.61	upd	upd
31.78	upd	upd
43.273	upd	upd
71.058	upd	upd
1512.1	upd	upd
58.086	upd	upd
969.019	upd	upd
485.566	upd	upd
38.307	upd	upd
45.249	upd	upd
38.827	upd	upd
30.685	upd	upd
61.396	upd	upd
38.328	upd	upd
22.114	upd	upd
31.287	upd	upd
5687.26	upd	upd
23.089	upd	upd
2927.36	upd	upd
2314.42	upd	upd
946.446	upd	upd
4625.83	upd	upd
5884.67	upd	upd
2530.83	upd	upd
251.779	upd	upd
22996.6	upd	upd
21187.2	upd	upd
0.015	upd	upd
2364.17	upd	upd
21.517	upd	upd
1.003	upd	upd
4782.05	upd	upd
2.469	upd	upd
0.014	upd	upd
13.55	upd	upd
126.399	upd	upd
8316.03	upd	upd
14938.5	upd	upd
27143.5	upd	upd
687.079	upd	upd
8021.24	upd	upd
2352.95	upd	upd
2662.16	upd	upd
572.321	upd	upd
3.974	upd	upd
925.444	upd	upd
3761.79	upd	upd
4.807	upd	upd
81.662	upd	upd
18556.8	upd	upd
17.202	upd	upd
5232.45	upd	upd
45.871	upd	upd
2251.27	upd	upd
12206.2	upd	upd
0.815	upd	upd
3.351	upd	upd
8716.24	upd	upd
10.258	upd	upd
7735.08	upd	upd
9.507	upd	upd
5388.95	upd	upd
2791.28	upd	upd
10261.1	upd	upd
13686.3	upd	upd
11.206	upd	upd
8817.1	upd	upd
7.222	upd	upd
1075.76	upd	upd
4056.44	upd	upd
1223.66	upd	upd
9245.4	upd	upd
0.159	upd	upd
3.301	upd	upd
599.173	upd	upd
416.785	upd	upd
258.799	upd	upd
25.926	upd	upd
160.65	upd	upd
1930.94	upd	upd
207.768	upd	upd
63.745	upd	upd
4006.83	upd	upd
1202.48	upd	upd
3489.24	upd	upd
7692.54	upd	upd
933.957	upd	upd
850.055	upd	upd
6151.92	upd	upd
6.653	upd	upd
0.031	upd	upd
2588.29	upd	upd
0.9	upd	upd
7.637	upd	upd
8.598	upd	upd
1.206	upd	upd
514.303	upd	upd
14.395	upd	upd
1.262	upd	upd
1844.67	upd	upd
218.985	upd	upd
5.649	upd	upd
1963.08	upd	upd
2.736	upd	upd
1011.57	upd	upd
33381	upd	upd
5565.33	upd	upd
198.048	upd	upd
21.699	upd	upd
46.191	upd	upd
66.826	upd	upd
6.471	upd	upd
11029.5	upd	upd
1139.47	upd	upd
63775.1	upd	upd
19061.5	upd	upd
101.403	upd	upd
27734.8	upd	upd
1748.29	upd	upd
10.65	upd	upd
2270.71	upd	upd
10342.7	upd	upd
541.369	upd	upd
4289.27	upd	upd
120.105	upd	upd
39446	upd	upd
770.517	upd	upd
3036.83	upd	upd
6487.27	upd	upd
16954.1	upd	upd
3271.96	upd	upd
2107.65	upd	upd
1867.93	upd	upd
873.445	upd	upd
800.489	upd	upd
828.142	upd	upd
13996.8	upd	upd
2041.28	upd	upd
1194.07	upd	upd
603.416	upd	upd
1878.84	upd	upd
10662	upd	upd
4107.67	upd	upd
13281.2	upd	upd
0.017	upd	upd
72.527	upd	upd
18164.5	upd	upd
41348.7	upd	upd
0.996	upd	upd
119.244	upd	upd
7096.38	upd	upd
6902.88	upd	upd
9575.89	upd	upd
6.93	upd	upd
0.575	upd	upd
1.9	upd	upd
0.359	upd	upd
33666.7	upd	upd
188.985	upd	upd
8195.18	upd	upd
2.253	upd	upd
0.019	upd	upd
6.174	upd	upd
0.926	upd	upd
86.101	upd	upd
1.9	upd	upd
0.668	upd	upd
17184.3	upd	upd
7118.36	upd	upd
20310.6	upd	upd
29989.2	upd	upd
33522	upd	upd
8.92	upd	upd
32542.7	upd	upd
14.59	upd	upd
125.155	upd	upd
133.323	upd	upd
31.905	upd	upd
47085.9	upd	upd
15401.2	upd	upd
27525.7	upd	upd
431.233	upd	upd
18.543	upd	upd
4358.71	upd	upd
511	upd	upd
10.942	upd	upd
35.357	upd	upd
7.765	upd	upd
12.423	upd	upd
16.18	upd	upd
4.012	upd	upd
27931.7	upd	upd
31333.6	upd	upd
477.78	upd	upd
165.964	upd	upd
4406.76	upd	upd
25911	upd	upd
205.714	upd	upd
18.922	upd	upd
204.825	upd	upd
22891.7	upd	upd
33888.6	upd	upd
81195.2	upd	upd
3595.4	upd	upd
9563.12	upd	upd
18.296	upd	upd
29.62	upd	upd
43.86	upd	upd
28191.6	upd	upd
142114	upd	upd
51304.6	upd	upd
22057.9	upd	upd
45806.8	upd	upd
113.356	upd	upd
22.934	upd	upd
123.577	upd	upd
105729	upd	upd
48377.8	upd	upd
1343.1	upd	upd
1224.02	upd	upd
25366.5	upd	upd
111129	upd	upd
12639.5	upd	upd
36352	upd	upd
106093	upd	upd
5249.69	upd	upd
10615.8	upd	upd
6531.55	upd	upd
117.666	upd	upd
18234.8	upd	upd
0.074	upd	upd
1805.19	upd	upd
0.389	upd	upd
13399.7	upd	upd
59.455	upd	upd
2039	upd	upd
1674.49	upd	upd
4441.85	upd	upd
12853	upd	upd
26549	upd	upd
28562	upd	upd
2605	upd	upd
3239.48	upd	upd
17936.9	upd	upd
136.011	upd	upd
71878.2	upd	upd
18827.9	upd	upd
712.142	upd	upd
171264	upd	upd
1984.44	upd	upd
107658	upd	upd
33415.9	upd	upd
11830.2	upd	upd
1039.83	upd	upd
3188.85	upd	upd
46.734	upd	upd
702.808	upd	upd
1166.4	upd	upd
19.365	upd	upd
42177.5	upd	upd
70.537	upd	upd
22536	upd	upd
48129.9	upd	upd
51304.6	upd	upd
146.401	upd	upd
62.52	upd	upd
17.329	upd	upd
2.014	upd	upd
106.633	upd	upd
260.015	upd	upd
61.462	upd	upd
834.516	upd	upd
17050.7	upd	upd
3373.83	upd	upd
1120.13	upd	upd
58.536	upd	upd
9.853	upd	upd
62.33	upd	upd
5339.71	upd	upd
6696.49	upd	upd
1614.05	upd	upd
263.231	upd	upd
38.313	upd	upd
4322.89	upd	upd
1088.13	upd	upd
111.498	upd	upd
3501.22	upd	upd
14.129	upd	upd
8349.56	upd	upd
21090	upd	upd
12411.8	upd	upd
121236	upd	upd
73.263	upd	upd
15.102	upd	upd
23.723	upd	upd
25382.3	upd	upd
57791.4	upd	upd
11239.2	upd	upd
29144.7	upd	upd
5.703	upd	upd
143.632	upd	upd
711.477	upd	upd
761.886	upd	upd
1022.01	upd	upd
1439.04	upd	upd
17.494	upd	upd
201.618	upd	upd
373.417	upd	upd
599.868	upd	upd
53.691	upd	upd
27.531	upd	upd
1481.36	upd	upd
108.296	upd	upd
1.316	upd	upd
1.097	upd	upd
163.55	upd	upd
55.313	upd	upd
7.29	upd	upd
3407.63	upd	upd
2597.27	upd	upd
279.225	upd	upd
482.713	upd	upd
88.382	upd	upd
3.732	upd	upd
8.902	upd	upd
77	upd	upd
2001.61	upd	upd
191.834	upd	upd
1454.3	upd	upd
354.518	upd	upd
216.609	upd	upd
178.694	upd	upd
137.929	upd	upd
610.206	upd	upd
792.335	upd	upd
61.773	upd	upd
396.542	upd	upd
425.39	upd	upd
646.077	upd	upd
15499	upd	upd
22467.5	upd	upd
6916.24	upd	upd
207.298	upd	upd
11.908	upd	upd
7.984	upd	upd
127.048	upd	upd
97.2	upd	upd
603.245	upd	upd
244.565	upd	upd
14.427	upd	upd
315.816	upd	upd
1551.43	upd	upd
1060.16	upd	upd
14682.2	upd	upd
571.781	upd	upd
70.214	upd	upd
1792.35	upd	upd
1879.59	upd	upd
44.557	upd	upd
346.548	upd	upd
124.895	upd	upd
400	upd	upd
[truncated: 99,892 more rows]

## Sheet: 4D_segments
loh.type	segment.count
loh	61469
upd	39877
mr	545

## Sheet: 4D_width
loh.type	segment.width
loh	847.463
upd	394.272
mr	17.1828

## Sheet: 4F
n.cncp	n.cncp.gs	tp	fp	fn	precision.cncp	recall.cncp	f1.cncp	pair	purity
2	10	0	2	10	0	0	0	sim_1	1
10	0	0	10	0	0	0	0	sim_10	0.604324
2	0	0	2	0	0	0	0	sim_100	0.826476
4	1	0	4	1	0	0	0	sim_101	0.878798
6	0	0	6	0	0	0	0	sim_102	0.615282
6	1	0	6	1	0	0	0	sim_103	0.98101
0	0	0	0	0	0	0	0	sim_104	0.66477
2	0	0	2	0	0	0	0	sim_105	0.860313
2	0	0	2	0	0	0	0	sim_107	0.796065
0	2	0	0	2	0	0	0	sim_108	0.744101
0	0	0	0	0	0	0	0	sim_109	0.889151
2	0	0	2	0	0	0	0	sim_11	0.729402
0	0	0	0	0	0	0	0	sim_110	1
6	0	0	6	0	0	0	0	sim_111	0.582241
0	0	0	0	0	0	0	0	sim_112	0.838275
4	0	0	4	0	0	0	0	sim_113	0.612104
2	0	0	2	0	0	0	0	sim_115	0.86
2	3	0	2	3	0	0	0	sim_116	0.564662
2	0	0	2	0	0	0	0	sim_117	0.55466
0	1	0	0	1	0	0	0	sim_118	0.54599
0	0	0	0	0	0	0	0	sim_119	1
0	0	0	0	0	0	0	0	sim_12	0.700761
2	0	0	2	0	0	0	0	sim_120	0.917769
2	2	0	2	2	0	0	0	sim_122	1
2	0	0	2	0	0	0	0	sim_123	1
2	4	0	2	4	0	0	0	sim_124	0.625519
4	0	0	4	0	0	0	0	sim_126	0.683799
2	0	0	2	0	0	0	0	sim_127	0.786554
0	3	0	0	3	0	0	0	sim_129	0.909245
4	2	0	4	2	0	0	0	sim_130	0.989529
2	0	0	2	0	0	0	0	sim_131	0.737661
0	4	0	0	4	0	0	0	sim_132	0.733376
2	1	0	2	1	0	0	0	sim_134	0.826404
4	2	0	4	2	0	0	0	sim_135	0.682461
2	8	0	2	8	0	0	0	sim_136	0.746479
5	1	0	5	1	0	0	0	sim_137	0.651578
2	3	0	2	3	0	0	0	sim_138	0.917389
4	1	0	4	1	0	0	0	sim_139	0.793126
2	2	0	2	2	0	0	0	sim_14	0.760885
2	0	0	2	0	0	0	0	sim_140	0.844597
2	0	0	2	0	0	0	0	sim_141	0.710192
4	0	0	4	0	0	0	0	sim_143	0.86
44	7	4	40	3	0.0909091	0.571429	0.156863	sim_144	0.979862
7	0	0	7	0	0	0	0	sim_145	0.913307
2	0	0	2	0	0	0	0	sim_146	0.936464
7	0	0	7	0	0	0	0	sim_147	0.657429
18	3	2	16	1	0.111111	0.666667	0.190476	sim_148	1
2	0	0	2	0	0	0	0	sim_150	0.937374
2	0	0	2	0	0	0	0	sim_151	0.82536
0	0	0	0	0	0	0	0	sim_152	1
4	0	0	4	0	0	0	0	sim_154	0.919295
2	2	2	0	0	1	1	1	sim_156	0.519862
6	0	0	6	0	0	0	0	sim_157	0.791034
2	0	0	2	0	0	0	0	sim_158	1
11	0	0	11	0	0	0	0	sim_16	0.919395
5	0	0	5	0	0	0	0	sim_161	0.828309
2	0	0	2	0	0	0	0	sim_162	0.881212
0	0	0	0	0	0	0	0	sim_164	0.761675
7	1	0	7	1	0	0	0	sim_165	0.948585
20	6	3	17	3	0.15	0.5	0.230769	sim_167	1
4	0	0	4	0	0	0	0	sim_169	0.922356
6	1	1	5	0	0.166667	1	0.285714	sim_17	0.739469
5	0	0	5	0	0	0	0	sim_171	0.971931
6	0	0	6	0	0	0	0	sim_175	0.90276
14	0	0	14	0	0	0	0	sim_176	0.719924
4	2	2	2	0	0.5	1	0.666667	sim_177	0.979786
4	0	0	4	0	0	0	0	sim_178	0.830074
8	2	2	6	0	0.25	1	0.4	sim_18	0.581804
3	3	0	3	3	0	0	0	sim_180	0.849926
2	0	0	2	0	0	0	0	sim_181	0.887861
0	0	0	0	0	0	0	0	sim_182	0.990056
7	0	0	7	0	0	0	0	sim_184	0.566711
4	0	0	4	0	0	0	0	sim_185	0.683831
20	6	2	18	4	0.1	0.333333	0.153846	sim_186	1
4	0	0	4	0	0	0	0	sim_187	0.539731
9	4	4	5	0	0.444444	1	0.615385	sim_188	0.799994
4	0	0	4	0	0	0	0	sim_189	0.612407
22	1	0	22	1	0	0	0	sim_190	0.526432
6	4	2	4	2	0.333333	0.5	0.4	sim_191	0.89869
3	0	0	3	0	0	0	0	sim_192	1
10	0	0	10	0	0	0	0	sim_193	0.791998
4	0	0	4	0	0	0	0	sim_194	1
5	0	0	5	0	0	0	0	sim_196	0.824689
8	1	0	8	1	0	0	0	sim_197	0.627567
4	0	0	4	0	0	0	0	sim_198	0.959985
2	1	0	2	1	0	0	0	sim_199	0.659281
0	1	0	0	1	0	0	0	sim_2	0.754893
3	0	0	3	0	0	0	0	sim_200	1
48	7	2	46	5	0.0416667	0.285714	0.0727273	sim_201	0.729961
12	3	0	12	3	0	0	0	sim_202	0.835882
31	8	5	26	3	0.16129	0.625	0.25641	sim_203	0.725093
6	0	0	6	0	0	0	0	sim_204	0.862489
14	2	2	12	0	0.142857	1	0.25	sim_207	0.584756
13	0	0	13	0	0	0	0	sim_208	0.767613
2	0	0	2	0	0	0	0	sim_209	0.513774
2	0	0	2	0	0	0	0	sim_21	0.859921
2	1	0	2	1	0	0	0	sim_210	0.900874
6	0	0	6	0	0	0	0	sim_211	0.599189
0	0	0	0	0	0	0	0	sim_212	0.886321
19	5	3	16	2	0.157895	0.6	0.25	sim_214	1
5	2	0	5	2	0	0	0	sim_216	0.927257
12	9	3	9	6	0.25	0.333333	0.285714	sim_218	0.87356
6	0	0	6	0	0	0	0	sim_220	0.848152
16	4	4	12	0	0.25	1	0.4	sim_221	1
12	0	0	12	0	0	0	0	sim_223	0.583136
4	0	0	4	0	0	0	0	sim_224	0.70125
4	0	0	4	0	0	0	0	sim_225	0.624092
2	0	0	2	0	0	0	0	sim_226	1
8	0	0	8	0	0	0	0	sim_227	0.790102
24	0	0	24	0	0	0	0	sim_228	0.624974
2	0	0	2	0	0	0	0	sim_23	1
2	0	0	2	0	0	0	0	sim_230	0.71236
14	0	0	14	0	0	0	0	sim_231	0.858288
7	0	0	7	0	0	0	0	sim_232	0.843926
23	9	4	19	5	0.173913	0.444444	0.25	sim_234	0.867948
5	3	0	5	3	0	0	0	sim_235	0.549273
2	0	0	2	0	0	0	0	sim_236	0.780694
12	1	0	12	1	0	0	0	sim_237	0.549443
12	0	0	12	0	0	0	0	sim_238	0.614705
4	2	2	2	0	0.5	1	0.666667	sim_24	0.690937
2	0	0	2	0	0	0	0	sim_240	1
2	0	0	2	0	0	0	0	sim_241	0.781936
0	0	0	0	0	0	0	0	sim_242	0.66
11	4	3	8	1	0.272727	0.75	0.4	sim_243	0.94
10	0	0	10	0	0	0	0	sim_246	0.580086
19	3	0	19	3	0	0	0	sim_247	0.571544
2	0	0	2	0	0	0	0	sim_248	0.952804
21	2	0	21	2	0	0	0	sim_25	0.8289
7	0	0	7	0	0	0	0	sim_250	0.675066
6	0	0	6	0	0	0	0	sim_251	0.509227
4	2	2	2	0	0.5	1	0.666667	sim_252	1
2	0	0	2	0	0	0	0	sim_253	0.948937
8	0	0	8	0	0	0	0	sim_254	0.898025
4	0	0	4	0	0	0	0	sim_258	0.748709
10	0	0	10	0	0	0	0	sim_259	0.649652
2	0	0	2	0	0	0	0	sim_26	0.507385
2	0	0	2	0	0	0	0	sim_260	0.819398
3	2	0	3	2	0	0	0	sim_262	0.967254
0	0	0	0	0	0	0	0	sim_263	0.66114
2	0	0	2	0	0	0	0	sim_264	0.752983
21	2	0	21	2	0	0	0	sim_265	0.67722
23	0	0	23	0	0	0	0	sim_266	0.77652
11	8	3	8	5	0.272727	0.375	0.315789	sim_267	0.697544
6	0	0	6	0	0	0	0	sim_268	0.950863
9	5	3	6	2	0.333333	0.6	0.428571	sim_269	0.916572
18	4	4	14	0	0.222222	1	0.363636	sim_27	0.541571
59	28	14	45	14	0.237288	0.5	0.321839	sim_271	0.74581
9	0	0	9	0	0	0	0	sim_272	1
4	0	0	4	0	0	0	0	sim_273	0.907184
4	0	0	4	0	0	0	0	sim_274	0.515997
0	0	0	0	0	0	0	0	sim_275	0.868753
12	2	2	10	0	0.166667	1	0.285714	sim_276	0.523134
19	6	0	19	6	0	0	0	sim_277	0.544336
2	1	0	2	1	0	0	0	sim_278	0.989865
13	1	1	12	0	0.0769231	1	0.142857	sim_279	0.777255
2	0	0	2	0	0	0	0	sim_280	0.786041
6	0	0	6	0	0	0	0	sim_281	1
11	6	5	6	1	0.454545	0.833333	0.588235	sim_284	0.854194
6	0	0	6	0	0	0	0	sim_285	0.557121
9	2	0	9	2	0	0	0	sim_286	0.924617
52	25	15	37	10	0.288462	0.6	0.38961	sim_288	0.952423
0	2	0	0	2	0	0	0	sim_289	0.505645
2	0	0	2	0	0	0	0	sim_292	0.789134
4	0	0	4	0	0	0	0	sim_293	0.520887
4	0	0	4	0	0	0	0	sim_294	0.873565
4	0	0	4	0	0	0	0	sim_295	0.677175
4	0	0	4	0	0	0	0	sim_297	0.79
7	0	0	7	0	0	0	0	sim_298	0.771524
6	2	1	5	1	0.166667	0.5	0.25	sim_299	0.5237
7	0	0	7	0	0	0	0	sim_3	0.969348
14	5	4	10	1	0.285714	0.8	0.421053	sim_300	0.518671
20	4	2	18	2	0.1	0.5	0.166667	sim_301	1
4	0	0	4	0	0	0	0	sim_302	0.918372
5	0	0	5	0	0	0	0	sim_304	0.621918
6	1	1	5	0	0.166667	1	0.285714	sim_305	0.710255
2	2	0	2	2	0	0	0	sim_306	0.959169
0	1	0	0	1	0	0	0	sim_307	0.608756
13	4	2	11	2	0.153846	0.5	0.235294	sim_308	1
17	4	4	13	0	0.235294	1	0.380952	sim_309	0.958941
20	4	3	17	1	0.15	0.75	0.25	sim_31	0.896305
18	2	2	16	0	0.111111	1	0.2	sim_310	0.558035
20	10	5	15	5	0.25	0.5	0.333333	sim_312	0.793784
4	2	2	2	0	0.5	1	0.666667	sim_313	0.944593
2	0	0	2	0	0	0	0	sim_314	0.746882
12	4	2	10	2	0.166667	0.5	0.25	sim_316	0.789506
2	1	0	2	1	0	0	0	sim_320	0.86872
3	0	0	3	0	0	0	0	sim_322	0.927771
7	0	0	7	0	0	0	0	sim_323	1
0	0	0	0	0	0	0	0	sim_324	0.668238
10	6	4	6	2	0.4	0.666667	0.5	sim_325	1
4	0	0	4	0	0	0	0	sim_327	0.643557
2	0	0	2	0	0	0	0	sim_329	0.782708
8	0	0	8	0	0	0	0	sim_33	1
2	0	0	2	0	0	0	0	sim_330	1
18	3	2	16	1	0.111111	0.666667	0.190476	sim_331	0.917513
5	1	0	5	1	0	0	0	sim_332	0.714814
19	6	0	19	6	0	0	0	sim_336	0.613136
4	0	0	4	0	0	0	0	sim_337	1
6	2	2	4	0	0.333333	1	0.5	sim_338	0.989764
7	1	1	6	0	0.142857	1	0.25	sim_339	0.653577
5	0	0	5	0	0	0	0	sim_34	0.688112
8	2	0	8	2	0	0	0	sim_340	1
3	0	0	3	0	0	0	0	sim_341	0.836994
0	0	0	0	0	0	0	0	sim_342	0.717932
4	0	0	4	0	0	0	0	sim_343	0.969352
2	0	0	2	0	0	0	0	sim_344	0.660166
0	0	0	0	0	0	0	0	sim_345	1
0	0	0	0	0	0	0	0	sim_347	0.786751
10	2	0	10	2	0	0	0	sim_348	0.893937
1	0	0	1	0	0	0	0	sim_349	0.795595
27	13	11	16	2	0.407407	0.846154	0.55	sim_350	0.779156
10	3	0	10	3	0	0	0	sim_351	0.693103
15	0	0	15	0	0	0	0	sim_352	0.575592
6	2	1	5	1	0.166667	0.5	0.25	sim_353	0.9434
19	4	4	15	0	0.210526	1	0.347826	sim_354	1
2	1	0	2	1	0	0	0	sim_355	1
2	0	0	2	0	0	0	0	sim_357	0.959103
2	2	2	0	0	1	1	1	sim_359	0.634337
6	0	0	6	0	0	0	0	sim_36	0.677426
4	0	0	4	0	0	0	0	sim_360	0.543064
4	0	0	4	0	0	0	0	sim_361	1
10	0	0	10	0	0	0	0	sim_362	0.92076
2	0	0	2	0	0	0	0	sim_364	1
5	0	0	5	0	0	0	0	sim_365	0.729391
2	0	0	2	0	0	0	0	sim_366	0.875355
2	0	0	2	0	0	0	0	sim_367	0.928555
9	4	4	5	0	0.444444	1	0.615385	sim_368	0.80412
4	0	0	4	0	0	0	0	sim_369	0.727682
4	0	0	4	0	0	0	0	sim_371	0.741284
5	0	0	5	0	0	0	0	sim_372	0.622521
11	2	2	9	0	0.181818	1	0.307692	sim_373	1
10	0	0	10	0	0	0	0	sim_375	0.949156
6	0	0	6	0	0	0	0	sim_376	0.610147
34	13	5	29	8	0.147059	0.384615	0.212766	sim_377	0.989991
30	13	7	23	6	0.233333	0.538462	0.325581	sim_379	0.540685
7	0	0	7	0	0	0	0	sim_38	0.676738
52	22	12	40	10	0.230769	0.545455	0.324324	sim_382	1
2	0	0	2	0	0	0	0	sim_384	1
5	0	0	5	0	0	0	0	sim_385	0.714667
0	0	0	0	0	0	0	0	sim_386	0.742278
4	0	0	4	0	0	0	0	sim_390	0.865282
12	2	2	10	0	0.166667	1	0.285714	sim_391	0.718025
12	0	0	12	0	0	0	0	sim_392	0.722832
6	2	2	4	0	0.333333	1	0.5	sim_393	0.681826
2	0	0	2	0	0	0	0	sim_396	0.641664
0	0	0	0	0	0	0	0	sim_398	0.796021
0	0	0	0	0	0	0	0	sim_399	0.647736
0	0	0	0	0	0	0	0	sim_4	0.564132
6	0	0	6	0	0	0	0	sim_40	0.78692
4	0	0	4	0	0	0	0	sim_400	0.862223
7	1	1	6	0	0.142857	1	0.25	sim_401	0.924917
8	0	0	8	0	0	0	0	sim_403	0.838234
4	0	0	4	0	0	0	0	sim_404	0.826076
3	1	1	2	0	0.333333	1	0.5	sim_405	1
8	5	2	6	1	0.25	0.666667	0.363636	sim_406	0.743091
6	0	0	6	0	0	0	0	sim_408	0.745554
2	0	0	2	0	0	0	0	sim_409	1
37	9	7	30	2	0.189189	0.777778	0.304348	sim_411	0.843489
6	2	2	4	0	0.333333	1	0.5	sim_412	0.687048
8	0	0	8	0	0	0	0	sim_413	0.865852
5	0	0	5	0	0	0	0	sim_415	0.65493
0	0	0	0	0	0	0	0	sim_416	0.968936
7	0	0	7	0	0	0	0	sim_418	0.884539
4	0	0	4	0	0	0	0	sim_419	0.960266
2	0	0	2	0	0	0	0	sim_42	0.948935
11	3	2	9	1	0.181818	0.666667	0.285714	sim_421	0.826121
4	0	0	4	0	0	0	0	sim_422	1
4	0	0	4	0	0	0	0	sim_423	1
14	0	0	14	0	0	0	0	sim_424	0.935687
0	0	0	0	0	0	0	0	sim_425	0.885385
4	0	0	4	0	0	0	0	sim_427	0.744315
0	0	0	0	0	0	0	0	sim_428	0.897864
31	6	5	26	1	0.16129	0.833333	0.27027	sim_429	0.641856
3	0	0	3	0	0	0	0	sim_43	0.721808
0	1	0	0	1	0	0	0	sim_430	0.611356
14	4	4	10	0	0.285714	1	0.444444	sim_431	0.766062
8	0	0	8	0	0	0	0	sim_433	0.635996
11	0	0	11	0	0	0	0	sim_434	0.530374
6	0	0	6	0	0	0	0	sim_435	0.949189
9	0	0	9	0	0	0	0	sim_436	0.567143
5	0	0	5	0	0	0	0	sim_438	0.867552
18	7	4	14	3	0.222222	0.571429	0.32	sim_439	0.552052
0	0	0	0	0	0	0	0	sim_44	0.889603
0	0	0	0	0	0	0	0	sim_440	0.830902
2	0	0	2	0	0	0	0	sim_441	0.818271
15	2	2	13	0	0.133333	1	0.235294	sim_442	0.725204
5	2	2	3	0	0.4	1	0.571429	sim_444	0.817106
14	5	5	9	0	0.357143	1	0.526316	sim_445	1
0	0	0	0	0	0	0	0	sim_447	0.823593
4	3	2	2	1	0.5	0.666667	0.571429	sim_448	0.744323
11	1	0	11	1	0	0	0	sim_45	0.517582
12	3	1	11	2	0.0833333	0.333333	0.133333	sim_450	1
22	2	1	21	1	0.0454545	0.5	0.0833333	sim_452	0.633354
15	5	5	10	0	0.333333	1	0.5	sim_453	0.629795
2	1	0	2	1	0	0	0	sim_455	1
13	2	2	11	0	0.153846	1	0.266667	sim_456	0.83
2	1	0	2	1	0	0	0	sim_457	0.940748
2	0	0	2	0	0	0	0	sim_458	0.714633
4	0	0	4	0	0	0	0	sim_459	0.638617
8	0	0	8	0	0	0	0	sim_46	0.861985
13	4	2	11	2	0.153846	0.5	0.235294	sim_460	0.592665
6	4	1	5	3	0.166667	0.25	0.2	sim_461	1
7	0	0	7	0	0	0	0	sim_462	0.84806
13	0	0	13	0	0	0	0	sim_463	0.912713
11	0	0	11	0	0	0	0	sim_464	0.89344
12	2	2	10	0	0.166667	1	0.285714	sim_465	0.890469
37	17	7	30	10	0.189189	0.411765	0.259259	sim_466	0.781782
12	2	2	10	0	0.166667	1	0.285714	sim_467	0.887043
4	0	0	4	0	0	0	0	sim_469	0.863679
2	0	0	2	0	0	0	0	sim_470	0.673408
2	0	0	2	0	0	0	0	sim_471	0.540079
11	2	0	11	2	0	0	0	sim_472	1
2	0	0	2	0	0	0	0	sim_475	0.814209
19	7	5	14	2	0.263158	0.714286	0.384615	sim_476	0.874726
55	18	9	46	9	0.163636	0.5	0.246575	sim_477	0.698743
5	0	0	5	0	0	0	0	sim_478	0.760167
5	0	0	5	0	0	0	0	sim_479	0.67
6	2	2	4	0	0.333333	1	0.5	sim_48	0.699813
14	2	2	12	0	0.142857	1	0.25	sim_482	0.563594
0	0	0	0	0	0	0	0	sim_483	0.892015
34	8	5	29	3	0.147059	0.625	0.238095	sim_485	0.989782
6	0	0	6	0	0	0	0	sim_487	1
11	2	2	9	0	0.181818	1	0.307692	sim_488	0.609243
12	1	0	12	1	0	0	0	sim_49	0.767859
3	1	1	2	0	0.333333	1	0.5	sim_491	0.633081
2	0	0	2	0	0	0	0	sim_492	0.77535
4	0	0	4	0	0	0	0	sim_493	0.516871
8	0	0	8	0	0	0	0	sim_494	0.69459
6	0	0	6	0	0	0	0	sim_496	0.52926
6	3	2	4	1	0.333333	0.666667	0.444444	sim_499	0.766823
4	0	0	4	0	0	0	0	sim_50	0.763648
2	0	0	2	0	0	0	0	sim_500	0.896056
13	3	3	10	0	0.230769	1	0.375	sim_51	0.927638
10	0	0	10	0	0	0	0	sim_53	0.69
2	0	0	2	0	0	0	0	sim_54	0.504846
0	0	0	0	0	0	0	0	sim_59	0.919026
0	0	0	0	0	0	0	0	sim_6	0.801615
6	0	0	6	0	0	0	0	sim_60	0.91783
2	0	0	2	0	0	0	0	sim_61	0.627691
4	0	0	4	0	0	0	0	sim_63	0.746104
8	0	0	8	0	0	0	0	sim_64	0.724349
2	0	0	2	0	0	0	0	sim_65	0.653693
17	2	2	15	0	0.117647	1	0.210526	sim_66	1
7	0	0	7	0	0	0	0	sim_67	1
21	0	0	21	0	0	0	0	sim_68	0.515443
4	2	0	4	2	0	0	0	sim_69	0.934751
16	1	1	15	0	0.0625	1	0.117647	sim_7	0.754866
0	0	0	0	0	0	0	0	sim_72	0.635623
4	0	0	4	0	0	0	0	sim_73	0.621706
18	1	0	18	1	0	0	0	sim_74	0.683652
45	14	7	38	7	0.155556	0.5	0.237288	sim_75	1
2	0	0	2	0	0	0	0	sim_76	0.694886
25	5	3	22	2	0.12	0.6	0.2	sim_79	0.808894
15	4	2	13	2	0.133333	0.5	0.210526	sim_8	0.802454
8	0	0	8	0	0	0	0	sim_81	0.640787
4	0	0	4	0	0	0	0	sim_82	0.692884
2	0	0	2	0	0	0	0	sim_83	0.544421
14	0	0	14	0	0	0	0	sim_84	0.9694
4	0	0	4	0	0	0	0	sim_85	0.76663
9	2	2	7	0	0.222222	1	0.363636	sim_86	0.938751
2	0	0	2	0	0	0	0	sim_87	0.826133
7	1	0	7	1	0	0	0	sim_88	0.967223
7	0	0	7	0	0	0	0	sim_89	0.791668
10	2	2	8	0	0.2	1	0.333333	sim_9	0.784922
17	2	1	16	1	0.0588235	0.5	0.105263	sim_92	0.590287
0	0	0	0	0	0	0	0	sim_93	0.617735
16	0	0	16	0	0	0	0	sim_94	0.58003
6	2	0	6	2	0	0	0	sim_95	0.509099
14	3	1	13	2	0.0714286	0.333333	0.117647	sim_97	0.76516
3	0	0	3	0	0	0	0	sim_99	0.700552

## Sheet: 4G
breakend.type	germline.or.somatic	tot	n.pos	frac	ci.lower	ci.upper
SRS loose	somatic	44609	218	0.00488691	0.00427057	0.00558999
SRS loose	germline	10965	2196	0.200274	0.192843	0.207915
SRS junction	germline	264006	8252	0.0312569	0.030598	0.0319294
SRS junction	somatic	263158	862	0.0032756	0.00306258	0.00350324

## Sheet: 4H
platform	germline.or.somatic	n.nahr	total	frac	ci.lower	ci.upper
ONT junction	somatic	18	5544	0.00324675	0.00198496	0.00523684
ONT junction	germline	54	548	0.0985401	0.0755068	0.127365
SRS junction	somatic	104	11626	0.00894547	0.00734982	0.0108736
SRS junction	germline	584	78646	0.00742568	0.00684316	0.00805683
SRS loose	somatic	2	259	0.00772201	0.00133864	0.0306418
SRS loose	germline	4	20	0.2	0.0661062	0.442686
