# Supplementary material for: Most large structural variants in cancer genomes can be detected without long reads
Source: Nat Genet. 2023 Nov 9;55(12):2139–48. doi: 10.1038/s41588-023-01540-6 (PMC10703688; doi:10.1038/s41588-023-01540-6)
Supplement: Supplementary file 7 — Statistical source data for Fig. 5. [file 41588_2023_1540_MOESM7_ESM.xlsx]

## Sheet: 5B
V1	V2	V3	V4	V5	V6	V7	V8	V9	V10	V11	V12	V13	V14	V15	V16	V17	V18	V19	V20	V21	V22	V23	V24	V25	V26	V27	V28	V29	V30	V31	V32	V33	V34	V35	V36	V37	V38	V39	V40	V41	V42	V43	V44	V45	V46	V47	V48	V49	V50
3.6902	1.30103	0	0	0	0	0	0	0	0	0	0	0	0	0	0	0	0	0	0	0	0	2.91062	0	2.19312	0	0	0	0	0	0	0	0	0	0	0	0.30103	0	0	0	0	0	0	0	0	0	0	0	0	1.65321
1.30103	5.72426	0.90309	0	0	0	0	0	0	0	0	0	2.29667	0	3.37218	0	0	0	0	0	0	0	0	2.22789	0	0	0	0	0	0	0	0	0	0	0	0	0	0	0	0	0	0	0	0	0	0	0	0	0	0
0	0.90309	3.06296	0	0	0	0	0	0	0	0	0	0	0	0	0	0	0	0	0	0	0	0	0	0	0	0	0	0	0	0	0	0	0	0	0	0	0	0	0	0	0	0	0	0	0	0	0	0	0
0	0	0	2	0	0	0	0	0	0	0	0	0	0	0	0	0	0.30103	0	0	0	0	0	0	0	0	0	0	0	0	0.30103	0	0	0	0	0	0	0	0	0	0	0	0	0	0.60206	0	0	0	0	0
0	0	0	0	2.72346	0	0	0	0	0.30103	0	0	0	0	0	0	0	0	0.60206	0.30103	0	0	0	0	0	0	0	0.60206	0	0	0	0	0	0.30103	0	0.30103	0	0	0.30103	0	0.30103	0.30103	0	0	0	0.60206	0	0	0	0
0	0	0	0	0	0	0	0	0	0	0	0	0	0	0	0.30103	0	0	0	0	0	0.30103	0	0	0	0	0	0	0	0	0	0	0	0	0	0	0.30103	0	0	0	0	0	0	0.30103	0.60206	0	0	0	0.30103	0
0	0	0	0	0	0	0	0	0.477121	0.477121	0.30103	0	0	0	0	0	0	0	0.477121	0	0	0	0	0.60206	0	0	0	0	0	0	0	0	0	0	0	0.30103	0	0	0	0.30103	0	0	0	0.30103	0	0	0.30103	0	0	0
0	0	0	0	0	0	0	0.60206	0.477121	0	0	0.30103	0.30103	0	0	0	0	0	0	0	0	0	0	0.477121	0	0	0	0	0	0	0	0	0	0	0	0	0	0	0	0	0	0	0	0.30103	0.60206	0	0	0	0	0
0	0	0	0	0	0	0.477121	0.477121	1.20412	0.30103	0.30103	0.778151	0.954243	0	1.85733	0	0.477121	1	0.30103	0.477121	0.30103	0	0	1	0	0	0.30103	0	0	0	0	0	0.30103	0	0	0.30103	0	0.90309	0.69897	0	0.954243	1	1	0.69897	1	0.30103	0.477121	0	0	0
0	0	0	0	0.30103	0	0.477121	0	0.30103	0.60206	0	0	0.30103	0	0	0	0	0	0	0.477121	0	0.30103	0	0.30103	0	0.30103	0	0	0	0	0.30103	0	0.30103	0	0	0	0	0	0.477121	0	0	0.30103	0.30103	0.30103	0.30103	0	0	0	0	0
0	0	0	0	0	0	0.30103	0	0.30103	0	5.24856	0	0	0	0	0	0	0	0.30103	0	0	0	0	0	0	0	0	0	0	0	0	0	0	0	0	0	0	0	0	0	0.778151	0	0.30103	0	0.30103	0	0	0	0	0
0	0	0	0	0	0	0	0.30103	0.778151	0	0	0	0	0	0.60206	0	0	0.60206	0.477121	0	0.477121	0.30103	0	0.477121	0	0	0.60206	0	0	0	0	0	0	0.69897	1.38021	0	0	0	0.60206	0	0.60206	0.30103	0.90309	0	0.477121	0	0	0	0	0
0	2.29667	0	0	0	0	0	0.30103	0.954243	0.30103	0	0	9.30087	7.67492	6.33111	0	0	0.477121	0.778151	0	3.48827	0	0	0	0	1.68124	0	0	0	0	0	0	0.30103	0.477121	0.30103	0	0	0	0.30103	0.477121	0.60206	0.477121	0.30103	0	0	0	0	0	0.30103	0
0	0	0	0	0	0	0	0	0	0	0	0	7.67492	11.0766	8.8646	0	0	0	0	0	0	0	0	0	0	0	0	0	0	0	0	0	0	0	0	0	0	0	0	0	0	0	0	0	0	0	0	0	0	0
0	3.37218	0	0	0	0	0	0	1.85733	0	0	0.60206	6.33111	8.8646	8.11419	0	0	0	0	0.30103	3.83506	0	0	0	0	2.63849	0	0	0	0	0	0	0	4.37885	4.74135	0	0.30103	0	0	0	0.30103	0	0	0	0	0	0	0	0	0
0	0	0	0	0	0.30103	0	0	0	0	0	0	0	0	0	2.60206	0	0	0	0	0	0	0	0	0	0	0	0	0	0	0	0	0	0	0	0	0	0	0	0	0	0	0	0	0	0	0	0	0	0
0	0	0	0	0	0	0	0	0.477121	0	0	0	0	0	0	0	5.79195	0	0	0	0	0	0	0.30103	0	0	0	0	0	0	0	0	0	0	0	0	0	0	0	0	0	0	0	0.30103	0.30103	0	0	0	0	0
0	0	0	0.30103	0	0	0	0	1	0	0	0.60206	0.477121	0	0	0	0	1.20412	0.477121	0.30103	0	0	0	0.778151	0	0	0	0	0	0	0	0	0	0	0	0	0	0	0	0	0.778151	0.60206	0	0.477121	0.30103	0.30103	0	0	0	0
0	0	0	0	0.60206	0	0.477121	0	0.30103	0	0.30103	0.477121	0.778151	0	0	0	0	0.477121	1.20412	0.477121	0.30103	0	0	0	0	0	0	0	0	0	0	0	0	0	0	0	0	0	0.30103	0	0.30103	0.778151	0.477121	0.90309	0.60206	0	0	0	0.30103	0
0	0	0	0	0.30103	0	0	0	0.477121	0.477121	0	0	0	0	0.30103	0	0	0.30103	0.477121	1.39794	0	0	0	0.30103	0	0	0	0	0.30103	0	0	0	0.477121	0	0	0	0	0	0.30103	0	0.477121	0	0.778151	0.30103	0	0.30103	0.30103	0	0	0
0	0	0	0	0	0	0	0	0.30103	0	0	0.477121	3.48827	0	3.83506	0	0	0	0.30103	0	1.90849	0	0	0	0	0	0	0	0	0	0	0	0	0	0	0	0	0	0	0	0	0	0	0	0	0	0	0	0	0
0	0	0	0	0	0.30103	0	0	0	0.30103	0	0.30103	0	0	0	0	0	0	0	0	0	0	0	0	0	0	0	0	0	0	0	0	0	0	0	0	0	0	0	0	0	0.30103	0	0.477121	0	0	0	0	0	0
2.91062	0	0	0	0	0	0	0	0	0	0	0	0	0	0	0	0	0	0	0	0	0	7.1725	0	2.80889	0	0	0	0	0	0	0	0	0	0	0	0	0	0	0	0.30103	0.30103	0	0	0	0	0	0	0	2.03342
0	2.22789	0	0	0	0	0.60206	0.477121	1	0.30103	0	0.477121	0	0	0	0	0.30103	0.778151	0	0.30103	0	0	0	0.954243	0	0	0	0	0	0	0	0	0	0	0	0.30103	0	0	0.30103	0	0.30103	0.477121	0.778151	0.60206	0.30103	0	0	0	0	0
2.19312	0	0	0	0	0	0	0	0	0	0	0	0	0	0	0	0	0	0	0	0	0	2.80889	0	3.03703	0	0	0	0	0	0	0	0	0	0	0	0.477121	0	0	0	0	0	0	0	0	0	0	0	0	1.68124
0	0	0	0	0	0	0	0	0	0.30103	0	0	1.68124	0	2.63849	0	0	0	0	0	0	0	0	0	0	0	0	0	0	0	0	0.30103	0	0	0	0	0	0	0	0	0	0	0	0.30103	0	0	0	0	0	0
0	0	0	0	0	0	0	0	0.30103	0	0	0.60206	0	0	0	0	0	0	0	0	0	0	0	0	0	0	0	0	0	0	0	0	0	0	0	0	0	0	0	0	0	0	0.60206	0	0.30103	0.30103	0	0	0	0
0	0	0	0	0.60206	0	0	0	0	0	0	0	0	0	0	0	0	0	0	0	0	0	0	0	0	0	0	0	0	0	0	0	0	0	0	0	0	0	0	0	0	0	0	0	0	0	0	0	0	0
0	0	0	0	0	0	0	0	0	0	0	0	0	0	0	0	0	0	0	0.30103	0	0	0	0	0	0	0	0	0	0.30103	0	0	0	0	0	0	0	0	0.30103	0	0	0	0	0	0.60206	0	0	0	0	0
0	0	0	0	0	0	0	0	0	0	0	0	0	0	0	0	0	0	0	0	0	0	0	0	0	0	0	0	0.30103	0	0	0	0	0	0	0	0	0	0	0	0	0	0	0.30103	0	0	0	0	0	0
0	0	0	0.30103	0	0	0	0	0	0.30103	0	0	0	0	0	0	0	0	0	0	0	0	0	0	0	0	0	0	0	0	0	0	0	0	0	0	0	0	0	0	0	0	0	0	0	0	0	0	0	0
0	0	0	0	0	0	0	0	0	0	0	0	0	0	0	0	0	0	0	0	0	0	0	0	0	0.30103	0	0	0	0	0	0.954243	0	0	0	0	0	0	0	0	0	0	0	0	0	0	0	0	0	0
0	0	0	0	0	0	0	0	0.30103	0.30103	0	0	0.30103	0	0	0	0	0	0	0.477121	0	0	0	0	0	0	0	0	0	0	0	0	2.51055	1.30103	0	0.30103	0.30103	0.30103	0	0	0	0.30103	0.30103	0	0.60206	0	0	0	0	0
0	0	0	0	0.30103	0	0	0	0	0	0	0.69897	0.477121	0	4.37885	0	0	0	0	0	0	0	0	0	0	0	0	0	0	0	0	0	1.30103	4.84321	5.11496	3.49471	4.52943	0	0	0	0	0	0.30103	0.30103	0.30103	0	0	0	0	0
0	0	0	0	0	0	0	0	0	0	0	1.38021	0.30103	0	4.74135	0	0	0	0	0	0	0	0	0	0	0	0	0	0	0	0	0	0	5.11496	7.74361	0	1.44716	0	0.30103	0	0	0	0	0	0	0	0	0	0	0
0	0	0	0	0.30103	0	0.30103	0	0.30103	0	0	0	0	0	0	0	0	0	0	0	0	0	0	0.30103	0	0	0	0	0	0	0	0	0.30103	3.49471	0	3.41514	3.9554	0	0	0	0.477121	0	0	0	0	0	0.30103	0	0	0
0.30103	0	0	0	0	0.30103	0	0	0	0	0	0	0	0	0.30103	0	0	0	0	0	0	0	0	0	0.477121	0	0	0	0	0	0	0	0.30103	4.52943	1.44716	3.9554	4.8366	0	0	0	0.30103	0	0	0	0	0	0	0	0	0.90309
0	0	0	0	0	0	0	0	0.90309	0	0	0	0	0	0	0	0	0	0	0	0	0	0	0	0	0	0	0	0	0	0	0	0.30103	0	0	0	0	0	0	0	0	0.60206	0.60206	0.477121	0.30103	0	0.60206	0	0	0
0	0	0	0	0.30103	0	0	0	0.69897	0.477121	0	0.60206	0.30103	0	0	0	0	0	0.30103	0.30103	0	0	0	0.30103	0	0	0	0	0.30103	0	0	0	0	0	0.30103	0	0	0	4.82324	0	0.477121	0.60206	0.60206	0.60206	0.30103	0	0.60206	0	0	0
0	0	0	0	0	0	0.30103	0	0	0	0	0	0.477121	0	0	0	0	0	0	0	0	0	0	0	0	0	0	0	0	0	0	0	0	0	0	0	0	0	0	0	0	0.30103	0.30103	0.477121	0	0	0.30103	0	0	0
0	0	0	0	0.30103	0	0	0	0.954243	0	0.778151	0.60206	0.60206	0	0.30103	0	0	0.778151	0.30103	0.477121	0	0	0.30103	0.30103	0	0	0	0	0	0	0	0	0	0	0	0.477121	0.30103	0	0.477121	0	2.79588	0.778151	0	1.07918	0.60206	0	0	0	0.30103	0
0	0	0	0	0.30103	0	0	0	1	0.30103	0	0.30103	0.477121	0	0	0	0	0.60206	0.778151	0	0	0.30103	0.30103	0.477121	0	0	0	0	0	0	0	0	0.30103	0	0	0	0	0.60206	0.60206	0.30103	0.778151	0.954243	1.07918	0.778151	0.778151	0	0.30103	0	0	0
0	0	0	0	0	0	0	0	1	0.30103	0.30103	0.90309	0.30103	0	0	0	0	0	0.477121	0.778151	0	0	0	0.778151	0	0	0.60206	0	0	0	0	0	0.30103	0.30103	0	0	0	0.60206	0.60206	0.30103	0	1.07918	0.954243	0.477121	0.60206	0	0.30103	0	0	0
0	0	0	0	0	0.30103	0.30103	0.30103	0.69897	0.30103	0	0	0	0	0	0	0.30103	0.477121	0.90309	0.30103	0	0.477121	0	0.60206	0	0.30103	0	0	0	0.30103	0	0	0	0.30103	0	0	0	0.477121	0.60206	0.477121	1.07918	0.778151	0.477121	0	0.30103	0	0.30103	0.30103	0.477121	0
0	0	0	0.60206	0	0.60206	0	0.60206	1	0.30103	0.30103	0.477121	0	0	0	0	0.30103	0.30103	0.60206	0	0	0	0	0.30103	0	0	0.30103	0	0.60206	0	0	0	0.60206	0.30103	0	0	0	0.30103	0.30103	0	0.60206	0.778151	0.60206	0.30103	0.954243	0	0.778151	0	0	0
0	0	0	0	0.60206	0	0	0	0.30103	0	0	0	0	0	0	0	0	0.30103	0	0.30103	0	0	0	0	0	0	0.30103	0	0	0	0	0	0	0	0	0	0	0	0	0	0	0	0	0	0	0.60206	0	0	0	0
0	0	0	0	0	0	0.30103	0	0.477121	0	0	0	0	0	0	0	0	0	0	0.30103	0	0	0	0	0	0	0	0	0	0	0	0	0	0	0	0.30103	0	0.60206	0.60206	0.30103	0	0.30103	0.30103	0.30103	0.778151	0	0.60206	0	0	0
0	0	0	0	0	0	0	0	0	0	0	0	0	0	0	0	0	0	0	0	0	0	0	0	0	0	0	0	0	0	0	0	0	0	0	0	0	0	0	0	0	0	0	0.30103	0	0	0	0	0	0
0	0	0	0	0	0.30103	0	0	0	0	0	0	0.30103	0	0	0	0	0	0.30103	0	0	0	0	0	0	0	0	0	0	0	0	0	0	0	0	0	0	0	0	0	0.30103	0	0	0.477121	0	0	0	0	2.15836	0
1.65321	0	0	0	0	0	0	0	0	0	0	0	0	0	0	0	0	0	0	0	0	0	2.03342	0	1.68124	0	0	0	0	0	0	0	0	0	0	0	0.90309	0	0	0	0	0	0	0	0	0	0	0	0	1.39794
0	0	0	0	0	0	0	0	0	0	0	0	0	0	0	0	0	0	0	0.477121	0	0	0	0.477121	0	0	0	0	0	0	0	0	0	0	0	0	0	0	0	0	0	0	0	0	0	0	0	0	0	0
0	0	0	0	0	0	0.477121	0	0.477121	0.30103	0	0.60206	0	0	0	0	0	0	0.60206	0.30103	0.30103	0.477121	0	0.477121	0	0	0.60206	0	0	0	0	0	0	0.30103	0	0	0	0	0.845098	0	0.477121	0.60206	0.778151	0.778151	0	0	0	0	0	0
0	0	0	0	0	0	0	0	0.30103	0	0	0.30103	0.477121	0	0.477121	0	0	0.477121	0	0	0.30103	0	0	0	0	0	0	0	0	0	0	0	0	0	0	0	0.30103	0.30103	0.30103	0	0.60206	0	0.30103	0.778151	0	0	0	0	0.60206	0
0	0	0	0	0	0	0	0	0.69897	0.30103	0	0	0	0	0	0	0	0.30103	0.30103	0	0	0	0	0.30103	0	0	0	0	0	0	0	0	0	0	0	0	0	0	0.60206	0	0.30103	0.477121	0.30103	0	0.30103	0	0.30103	0	0	0
0	1.47712	0	0	0	0	0	0	0	0	0	0	0.30103	0	0	0	0	0.30103	0.60206	0	0	0	0	0	0	0	0	0	0	0	0	0	0.30103	0	0	0.30103	0	0	0	0	0	0.30103	0.477121	0.477121	0	0	0	0	0	0
0	0	0	0	0	0	0	0	0.477121	0	0	0.477121	0	0	0	0	0.30103	0	0	0.30103	0	0	0	0	0	0	0	0	0	0	0	0	0	0	0	0	0.30103	0	0.30103	0	0.60206	0	1	0	0.30103	0	0	0	0	0
0	0	0	0	0	0	0	0.30103	0	0.30103	0.30103	0	0	0	0	0.30103	0	0	0	0	0	0	0	0.477121	0	0	0	0	0	0	0.30103	0	0	0	0	0	0.60206	0	0	0.30103	0.30103	0.30103	0	0	0	0	0	0	0	0
0	0	0	0	0	0	0	0	0	0	0	0.30103	0	0	0	0	0	0	0.30103	0	0	0	0	0.30103	0	0	0	0	0	0	0	0	0	0	0	0	0	0	0.30103	0	0	0	0.477121	0	0	0	0	0	0	0
0	0	0	0	0.30103	0	0.30103	0.30103	0.60206	0	0	0.60206	0.30103	0	0	0	0	0.477121	1.07918	0	0	0	0	0.778151	0	0	0	0	0	0	0	0.30103	0	0	0	0	0	0	1.07918	0	0.778151	0.30103	1.07918	0.477121	0.477121	0	0.477121	0.30103	0	0
0	0	0	0	0	0	0.30103	0	0	0.30103	0	0	2.49415	0	0	0	0	0.30103	0	0.30103	0.60206	0	0	0	0	0.778151	0	0	0.30103	0	0	0	0	0	0	0	0	0	0	0	0.30103	0	0	0	0	0	0	0	0	0
0	0	0	0	0.30103	0	0	0	1	0	0	0	0	0	0	0	0	0.60206	0	0.30103	0	0	0	0.30103	0	0.30103	0	0	0.30103	0	0	0	0.30103	0	0	0	0	0	0.30103	0	0.477121	0	0.477121	0.90309	0.30103	0	0.30103	0.30103	0	0
0	0	0	0	0.30103	0	0.477121	0	1.20412	0	0	0.30103	0	0	0.477121	1.07918	0	0	0.30103	0.60206	0	0	0	0.778151	0	0	0	0	0	0	0.30103	0	0	0	0	0	0	0	0.60206	0.30103	0	0.60206	0.30103	0.778151	0.30103	0	0.477121	0.30103	0	0
0	0	0	0	0	0	0	0	0.60206	0	0	0.477121	0	0	0	0.30103	0	0	0	0	0	0	0	0.477121	0	0	0	0	0	0	0	0	0.60206	0	0	0	0	0	0	0.30103	0	0.30103	0.30103	0.30103	0	0	0.60206	0	0	0
0	0	0	0	0.60206	0.30103	0.60206	0.30103	1.47712	0.30103	0	0	0.778151	0	0	0	0	0.477121	1.38021	1.20412	0	0.30103	0	0.60206	0	0.477121	0.477121	0	0	0.60206	0.30103	0	0.778151	0.30103	0	0	0	0.60206	0.90309	0	0.954243	1.54407	0.778151	1.07918	0.778151	0.60206	0.778151	0	0	0
0	0	0	0	0	0	0.30103	0	0.30103	0	0	0	0	0	0	0	0	0.30103	0	0	0	0	0	0	0	0.30103	0	0	0	0	0	0	0	0	0	0	0	0	0.30103	0	0.30103	0.30103	0	0.60206	0	0	0	0.30103	0	0
0	0	0	0	0.30103	0	0	0	0	0.30103	0	0	0	0	0	0	0	0	0	0	0	0	0	0.60206	0	0.69897	0	0	0	0	0	0	0	0	0	0	0	0	0	0	0.30103	0	0	0	0	0	0	0	0	0
0	0	0	0	0	0	0	0.477121	0.90309	0	0	0	0	0	0	0	0	0	0.30103	0.60206	0	0	0	0.778151	0	0	0	0	0	0	0	0	0	0.30103	0	0	0	0	0.30103	0	0.90309	0	0.30103	0	0	0	0.477121	0	0	0
0	0	0	0	0	0	0	0	0	0	0	0	0.30103	0	0	0	0.30103	0.30103	0	0	0	0	0	0.30103	0	0	0	0	0	0	0	0	0	0.30103	0	0.30103	0	0	0	0	0.30103	0	0.30103	0	0	0	0	0	0	0
0	0	0	0	0	0	0.30103	0.30103	1.07918	0.30103	0	0	0	0	0	0.477121	0	0	0	0	0	0.30103	0	0.30103	0	0	0	0	0	0	0	0	0.30103	0.30103	0	0	0	0	0.60206	0.30103	0.30103	0.477121	0	0.30103	0.30103	0	0.60206	0	0	0
0	0	0	0.30103	0	0.30103	0	0	0.30103	0	0	0	0.90309	0	0	0.60206	0	0	0	0.477121	0	0	0	0	0	0	0	0	0	0	0	0	0.60206	0	0	0.477121	0	0.30103	0	0	0	0	0	0	0.778151	0	0	0	0	0
2.78958	0	0	0	0	0	0	0	0	0	0	0	0	0	0	0	0	0	0	0	0	0	2.5563	0	1.51851	0.30103	0	0	0	0	0	0	0	0	0	0	1.85733	0	0	0	0	0	0	0	0	0	0	0	0	1
0	0	0	0.30103	0	0	0	0	0.30103	0	0	0	0	0	0.778151	0	0	0	0	0	0	0	0	0	0	0	0	0	0	0	0	0	0	0	0	0	0	0.30103	0	0	0	0	0	0	0	0	0	0	0	0
0	0	0	0	0	0.30103	0	0.60206	1.44716	0	0	0	0	0	0	0	0	0	0	0	0	0	0	0.477121	0	0	0	0	0	0	0.30103	0	0	0	0	0	0	0.30103	0	0	0.778151	0.60206	0.69897	0.30103	0.90309	0	0.30103	0	0	0
0	0	0	0	0	0	0	0	0.778151	0.30103	0	0.778151	0.30103	0	0.30103	0	0	0	0	0	0	0	0	0.69897	0	0	0.30103	0	0	0	0.30103	0	0	0	0	0.30103	0	0.30103	0.60206	0.30103	0.477121	0.60206	0	0.778151	0.477121	0	0.30103	0	0	0
0	0	0	0	0	0	0	0	0	0	0	0	0	0	0	0	0	0	0	0	0	0	0	0	0	0	0	0	0	0	0	0	0	0	0	0	0	0	0	0	0	0	0	0	0	0	0	0	0	0
0	0	0	0	0.30103	0	0	0	0.30103	0	0.30103	0	3.0103	0	0	0	0	0	0	0	0	0.477121	0	0	0	0	0	0	0	0	0	0	0	0	0	0	0	0	0.477121	0	0	0.30103	0	0	0	0	0	0	0	0
0	0	0	0	0	0	0.30103	0	0.30103	0.30103	0	0	0.30103	0	0	0	0	0.60206	0	0.60206	0	0	0	0.954243	0	0	0	0	0	0.30103	0	0	0	0	0	0.477121	0.30103	0.30103	0	0.477121	1.07918	0.30103	0.60206	0.477121	0.778151	0	0.30103	0	0	0
0	0	0	0	0	0	0.60206	0	0.477121	0	0	0	0.30103	0	0	0	0.30103	0.90309	0	0.477121	0	0.477121	0	0.60206	0	0	0.60206	0	0	0	0	0.30103	0	0	0	0.30103	0.60206	0.30103	0.778151	0.477121	1.07918	0.477121	0.477121	0.477121	0.477121	0	0	0	0	0
0	0	0	0	0	0	0.30103	0	0.60206	0	0	0.477121	0	0	0	0	0	0.30103	0.30103	0	0	0	0	0.30103	0	0	0	0	0	0	0	0	0	0	0	0	0	0	0	0	0.30103	0	0	0.477121	0.30103	0	0	0	0	0
0	0	0	0	0.30103	0	0.60206	0	0.778151	0.30103	0	0.30103	0	0	0	0	0	0.30103	0.60206	0	0	0	0	0.30103	0	0	0.30103	0	0	0	0	0	0	0	0	0	0	0	0.477121	0	0.60206	0.30103	0.30103	1.07918	0	0	0.69897	0	0	0
0	0	0	0	0	0	0.30103	0	0.477121	0	0.30103	0.477121	0	0	0	0	0	0.778151	0	0.30103	0	0	0	0.477121	0	0	0	0	0	0	0	0	0	0	0	0	0	0	0	0	0.30103	0.30103	0.30103	0.30103	0.477121	0	0.477121	0	0	0
0	0	0	0	0	0	0.30103	0	0.477121	0	0	0.60206	0.60206	0	0	0	0	0.30103	0.778151	0.60206	0	0	0	0.477121	0	0	0	0	0	0	0	0	0	0.60206	0.477121	0	0	0	0.30103	0.30103	0.30103	0	0.90309	0.477121	0	0	0	0	0	0
0	0	0	0	0	0	0	0	0.60206	0.30103	0	0.30103	0.30103	0	0	0	0	0.477121	0	0.477121	0	0	0	0	0	0	0	0	0	0	0	0	0.30103	0	0	0	0	0	0	0	0.30103	0.30103	0.477121	0.477121	0.69897	0	0.477121	0.30103	0	0
2.29667	0	0	0	0	0	0	0	0.60206	0.778151	0.30103	0	0	0	0	0	0	0	0	0.30103	0	0	3.03342	0.477121	3.28691	0	0	0	0	0	0	0	0.30103	0	0	0	0	0	0	0	0.30103	0	0.30103	0.69897	0	0	0.30103	0	0	1.47712
0	0	0	0.30103	0	0	0.69897	0	1.20412	0	0	0.30103	0.477121	0	0	0	0	1.07918	0.60206	0	0	0	0	0.778151	0	0	0.778151	0	0	0	0	0	0.30103	0	0	0	0	0	0.30103	0	0.60206	0.60206	0	0.778151	0.477121	0	0.30103	0.30103	0	0
0	0	0	0	0.477121	0	0.30103	0.477121	0.30103	0	0	0.30103	0	0	0	0	0	0	0.60206	0	0	0	0	0	0	0	0.30103	0	0	0	0	0	0.30103	0	0	0	0	0	0	0	0.30103	0	0	0.30103	0	0	0.477121	0	0.30103	0
0	0.30103	0	0	0	0	0	0.30103	0	0	0	0	0	0	0	0	0	0	0	0	0	0.30103	0	0	0	0	0	0	0	0	0	0	0	0	0	0	0	0	0	0	0	0	0	0	0	0	0	0	0	0
0.30103	0	0	0	0.30103	0	0	0	0.30103	0	0	0	0.30103	0	0	0	0	0.30103	0.477121	0	0	0	0.60206	0.30103	0.477121	0	0	0	0	0	0.30103	0	0	0	0	0	0	0	0	0	0	0.477121	0	0.477121	0.30103	0	0	0	0	0.477121
0	0	0	0	0.30103	0	0	0	0.30103	0.30103	0.30103	0	0.30103	0	0	0	0	0	0.69897	0	0	0	0.30103	0	0	0	0	0	0	0	0	0	0	0.60206	0	0.477121	0	0	0.778151	0	0.778151	0.778151	0	1.07918	0	0	0.477121	0.30103	0	0
0	0	0	0	0	0	0	0	0	0	0	0	0	0	0	0	0	0	0.30103	0	0.30103	0	0	0	0	0	0	0	0	0.477121	0	0	0	0	0	0	0	0	0	0	0	0	0	0	0.30103	0	0	0	0	0
0	0	0	0	0	0	0	0	0	0	0	0	0	0	0	0	0	0	0	0	0	0	0	0	0.477121	0	0	0	0	0	0	0	0	0	0	0	0.477121	0	0	0	0	0	0	0	0	0	0	0	0	0.60206
0	0	0	0	0	0	0	0.477121	0	0	0	0.30103	0	0	0	0	0	0	0	0	0	0	0	0	0	0	0	0	0.30103	0	0	0	0	0	0	0	0	0	0.477121	0	0.30103	0	0	0	0	0	0	0	0	0
0	0	0	0	0	0	0	0	0.60206	0.30103	0	0.69897	0	0	0	0	0	0	0	0.30103	0	0	0	0.30103	0	0	0	0	0	0	0	0	0	0	0	0	0	0	0.778151	0	0.30103	0	0.778151	0.60206	0.30103	0.30103	0	0	0	0
0	0	0	0	0	0	0.30103	0	0.60206	0	0	0.778151	0	0	0	0	0	0	0.477121	0.69897	0	0.30103	0	0.30103	0	0	0.477121	0	0	0	0	0	0.30103	0.30103	0	0.30103	0	0	0.778151	0	0.778151	0.477121	0.60206	0.30103	0.30103	0.30103	0.30103	0	0	0
0	0	0	0	0.30103	0	0	0.90309	0.90309	0.30103	0.30103	1.07918	0.69897	0	0	0.30103	0	0.30103	1.47712	0.477121	0.477121	0	0	0.477121	0	0	0.477121	0	0	0	0	0	0	0	0	0	0.30103	1.14613	1.25527	0.30103	0.60206	0.30103	1.44716	0.69897	0.60206	0	0.477121	0	0	0
0	0	0	0	0.60206	0	0	0.60206	0.845098	0	0	0	0.477121	0	0	0	0	0	0	0.60206	0	0	0.30103	0.69897	0	0	0.477121	0	0	0	0	0	0	0	0	0.30103	0	0	0.30103	0	0	0	0	0.30103	0.60206	0	0.30103	0	0	0
0	0	0	0	0	0	0	0.477121	0.30103	0	0	0.30103	1.6902	0	1.51851	0	0.30103	0	0.30103	0	0	0	0	0	0	0	0	0	0	0	0.30103	0	0.60206	0	0	0	0	0	0	0	0.30103	0	0.30103	0	0.30103	0	0	0	0	0
0	0	0	0	0	0	0.30103	0	0.30103	0	0	0	0	0	0	0	0	0.30103	0	0	0	0	0	0	0	0	0	0	0	0	0	0	0	0	0	0	0	0	0	0	0.30103	0	0	0	0	0	0	0	0	0
0	0	0	0	0	0	0	0	0	0	0	0	0	0	0	0	0	0	0	0	0	0	0	0	0	0	0	0	0	0	0	0	0	0	0	0	0	0	0	0	0.30103	0	0	0	0	0	0	0	0	0
0	0	0	0	0.30103	0	0	0.477121	1.17609	0	2.01703	0	0	0	0	0	0	0.30103	0.477121	0	0	0.30103	0	0.778151	0	0.30103	0.60206	0	0.30103	0	0	0	0	0	0	0	0	0	0.90309	0	0.477121	0.477121	0.954243	1.07918	0.30103	0	0	0	0	0
0	0	0	0.30103	0	0	0.30103	0.30103	0.30103	0	0	0	0	0	0	0	0	0.30103	1	0	0	0	0	0	0	0	0	0	0	0	0	0	0	0	0	0	0	0	0	0	0.30103	0.778151	0	0.30103	0	0	0	0	0	0
0	0	0	0	0.30103	0	0.30103	0	1.25527	0.30103	0	0	0.69897	0	0	0	0	0.477121	0.954243	0	0	0	0	0	0	0	0	0	0	0	0	0	0	0.30103	0	0.30103	0	0.30103	0.30103	0	0.954243	1.14613	0.30103	0.60206	0.778151	0	0.30103	0.30103	0	0
0	0	0	0	0	0	0	0	0	0	0	0	0	0	0	0	0	0	0	0	0	0	0	0.30103	0	0	0	0	0	0	0	0	0	0	0	0	0	0	0	0.30103	0.30103	0.30103	0	0.30103	0	0	0.30103	0	0	0
0	0	0	0	0	0	0.30103	0	0.477121	0.30103	0.30103	0	0.30103	0	0	0	0	0	0.30103	0.60206	0	0	0	0	0	0	0	0	0.477121	0	0	0	0	0.30103	0	0	0	0	0	0.30103	0.30103	0.60206	0	0.778151	0	0	0	0	0	0
0	0	0	0	0	0	0	0	1	0	0.30103	0.60206	0.30103	0	0	0	0	0	0.30103	0	0	0	0	0.30103	0	0	0	0	0	0.30103	0	0	0.30103	0	0	0	0	0.30103	0.30103	0	0.778151	0.30103	0.845098	1.07918	0.477121	0	0.477121	0	0	0
0	0	0.30103	0.30103	0.30103	0	0	0	0.477121	0.477121	0	0	0.30103	0	0.30103	0	0	0.477121	0	0	0	0	0	0.30103	0	0	0	0	0	0	0	0	0.30103	0	0	0	0	0.477121	0	0	0.30103	0	0	0	0	0	0	0	0	0
0	0	0	0	0	0.30103	0	0.69897	0.60206	0.778151	0	0.845098	0	0	0.30103	1	0	0	0.477121	0	0	0	0	0.778151	0	0	0	0	0.477121	0	0	0	0.30103	0	0	0.30103	0	0	0.60206	0	0.90309	0.30103	0.477121	0.778151	0.30103	0	0.477121	0	0	0
0	0	0	0	0	0	0.30103	0	1	0	0.30103	0.60206	0	0	0.30103	0	0	0	0	0	0	0	0	0.69897	0	0	0	0	0.477121	0	0	0	0.30103	0	0	0.30103	0	0.30103	0	0	0	0.90309	0.60206	0.30103	0.60206	0	0	0	0	0
0	0	0	0	0	0	0	0	0.845098	0	0	0.30103	0.30103	0	0	0	0	0	0	0	0	0.30103	0	0.30103	0	0	0.30103	0	0	0	0	0	0	0	0	0	0.30103	0.477121	0.69897	0.845098	1.25527	0.30103	0.477121	1.17609	0.90309	0	0.30103	0.30103	0	0
3.27692	0	0	0	0	0	0	0	0	0	0	0	0	0	0	0	0	0	0	0	0	0	2.62118	0	2.30963	0.30103	0	0	0	0	0	0	0	0	0	0	0.60206	0	0	0	0	0	0	0	0	0	0	0	0	2.04139
0	0	0	0	0	0	0	0	1	0	0	0	0.30103	0	0	0	0	0.60206	0	0.477121	0	0	0	0	0	0.30103	0.30103	0	0	0	0	0	0	0	0	0	0.30103	0.30103	0	0	0.778151	0.30103	0.477121	0	0.477121	0	0	0	0	0
0	0	0	0	0.30103	0	0	0	0	0	0	0	0	0	0	0	0	0	0	0	0	0	0	0	0	0	0	0	0	0	0	0	0	0	0	0	0	0	0	0	0.30103	0	0	0	0	0	0	0	0	0
0	0	0	0	0	0	0	0	0	0	0	0	0	0	0.30103	0	0	0	0	0	0	0	0	0	0	0	0	0	0	0	0	0.477121	0	0	0	0	0	0	0	0	0.30103	0	0	0	0	0	0	0	0	0
0	0	0	0	0.30103	0	0	0	0	0	0	0.30103	0	0	0	0	0	0	0	0	0	0	0	0	0	0	0	0	0	0	0	0	0	0	0	0	0	0	0	0	0	0	0	0	0	0	0	0	0	0
0	0	0	0	0	0	0	0	0	0	0	0	0	0	0	0	0	0	0	0.30103	0	0	0	0.30103	0	0	0	0	0	0	0	0	0	0	0	0	0	0.30103	0	0	0.778151	0	0	0	0.30103	0	0	0	0	0
0	0	0	0	0.30103	0	0	0	0	0	0	0	0	0	0	0	0	0	0	0	0	0	0	0	0	0	0	0	0	0	0	0	0	0	0	0	0	0	0	0	0	0	0.30103	0	0.477121	0.30103	0	0	0	0
0	0	0	0	0	0	0	0	0.30103	0	0	0	0	0	0	0	0.30103	0	0	0	0.30103	1.5563	0	0	0	0	0	0	0	0	0	0	0	0	0	0	0	0	0	0	0	0	0	0	0	0	0	0	0	0
0	0	0	0	0.30103	0.30103	0.30103	0	0.778151	0	0	0	0.477121	0	0	1.07918	0	0	0.30103	0	0	0.30103	0	0.60206	0	0	0	0	0	0	0	0	0	0	0	0	0	0.30103	0.60206	0	0	0.477121	1.07918	0.60206	1.07918	0	0	0	0	0
0	0	0	0	0.477121	0	0.477121	0	0.30103	0.30103	0	0	0	0	0.30103	0	0	0	0.30103	0.778151	0	0	0	0.30103	0	0	0.30103	0	0.69897	0	0	0	0.30103	0	0	0	0.954243	0.30103	0	0.60206	0.30103	0	0.30103	0.60206	0.30103	0	0.477121	0.30103	0	0
0	0	0	0	0.30103	0	0	0	0	0	0	0	0.30103	0	0	0	0	0	0.60206	0	0	0.60206	0	0.778151	0	0	0.30103	0	0	0	0	0	0	0.30103	0	0	0.30103	0.30103	0	0.30103	0.477121	0	0	0.60206	0	0	0.60206	0	0	0
0	0	0	0	0.30103	0	0.30103	0	0	0	0	0.477121	0	0	0	0	0	0	0	0.477121	0	0.477121	0	0	0	0	0	0	0	0	0	0	0.30103	0.477121	0	0.30103	0.30103	0.477121	0.477121	0.30103	0.954243	0.30103	0.30103	0.30103	0.60206	0	0	0	0	0
0	0	0	0	0	0	0.477121	0	0.60206	0	0	0	0.30103	0	0	0	0	0	0	0	0	0	0	0.60206	0	0	0	0	0	0	0.477121	0	0.30103	0	0	0.30103	0	0	0.30103	0	0.60206	0.30103	0.477121	0.90309	0	0.30103	0	0	0	0
0	0	0	0	0.477121	0	0.30103	0	0.477121	0	0.30103	0	0	0	0	0	0	0	0.477121	0	0	0.30103	0	0	0	0	0.30103	0	0	0	0.30103	0	0	0	0	0	0	0	0	0	0	0	0.60206	0.477121	0	0	0	0	0	0
0	0	0	0	0	0	0.30103	0	0.30103	0	0	0.778151	0.30103	0	0.30103	0	0	0	0	0	0	0	0	0.30103	0	0	0	0	0.477121	0	0	0	0	0	0	0	0	0	0.30103	0	0.30103	0	0.778151	0.30103	0	0	0	0	0	0
0	0	0	0	0	0	0	0	0.477121	0	0	0.30103	0.30103	0	0	0	0.30103	0	0	0	0	0	0	0	0	0	0.30103	0	0	0	0.30103	0	0	0	0	0	0	0	0.30103	0	0.30103	0.477121	0.30103	0	0	0	0.30103	0	0	0
0	0	0	0	0	0	0	0	0.30103	0	0	0.60206	0	0	0	0	0	0	0.30103	0	0	0	0	0.30103	0	0	0	0	0	0	0	0	0.477121	0	0	0.30103	0.30103	0.60206	0.30103	0	0.30103	0.30103	0.60206	0	0.30103	0.30103	0	0	0	0
0	0	0	0	0	0.30103	0	0	0.477121	0	0.30103	0.30103	0	0	0	0	0	0	0	0.30103	0	0	0	0	0.30103	0.30103	0	0	0.60206	0	0	0	0	0.90309	0	0.69897	0	0	0	0	0.30103	0	0	0.477121	0	0	0.30103	0	0	0
3.13354	0	0	0	0	0	0	0	0	0	0	0	0	0	0	0	0	0	0	0	0	0	1.73239	0	1.65321	0	0	0	0	0	0	0	0	0	0	0	0	0	0	0	0	0	0	0	0	0	0	0	0	1.89209
2.33445	0	0	0	0	0	0	0	0	0	0	0	0	0	0	0.778151	0	0	0	0	0	0	2.34242	0	1.6902	0	0	0	0	0	0	0	0	0	0	0	0.30103	0	0	0	0	0	0	0.30103	0	0	0	0	0	2.13033
0	0	0	0	0.30103	0	0	0	0	0	0	0	0	0	0	0	0	0	0	0	0	0	0	0	0	0	0	0	0	0	0	0	0	0	0	0	0	0	0	0	0	0	0.30103	0	0	0	0	0	0	0
0	0	0	0	0	0	0	0	0.30103	0	0	0	0	0	0	0	0	0	0	0	0	0	0	0	0	0	0	0.30103	0	0	0	0	0	0	0	0	0	0	0	0	0.477121	0	0	0	0	0	0	0	0	0
0	0	0	0	0.30103	0	0	0.30103	0.69897	0	0	0	0	0	0.30103	0	0	0	0	0	0	0	0.30103	0	0.30103	0	0	0	0	0	0	0	0.477121	0	0	0	0	0	0.477121	0	0.778151	0.30103	1.17609	0	0.60206	0	0.477121	0	0	0
0.30103	0	0	0	0	0	0	0	1	0	0	0.30103	0.30103	0	0	0	0	0.30103	0.60206	0	0	0	1.54407	0	0.778151	0	0	0	0	0	0	0	0	0	0	0	0	0.30103	0	0	0.30103	0	0.60206	0.30103	0.30103	0	0	0	0	0
0	0	0	0	0	0	0	0	0.477121	0	0	0	1.90309	0	1.79934	0	0	0	0	0	0	0	0.477121	0.30103	0.30103	0	0	0	0	0	0	0	0	0	0.30103	0	0	0	0	0	0	0	0	0	0	0	0.30103	0	0	0
0	0	0	0	0	0	0.60206	0	0.778151	0	0	0.477121	0	0	0	0	0	0.477121	0.30103	0	0	0	0	0.778151	0	0	0	0	0	0	0	0	0	0	0	0	0	0	0.30103	0	0.477121	0	0.477121	0.30103	0.30103	0	0.477121	0	0	0
0	0	0	0	0	0	0	0	3.27416	0	0	0	0	0	0	0	0	0	0	0	0	0	0	0	0	0	0	0	0	0	0	0	0	0	0	0	0	0	0	0	0.30103	0	0	0	0.30103	0	0	0	0	0
0	0	0	0	0	0	0	0	0	0	0	0	0	0	0	0	0	0	0	0	0	0	0	0	0	0	0	0	0	0	0	0	0	0	0	0	0	0	0	0	0.30103	0	0	0	0	0	0	0	0	0
0	0	0	0	0	0	0	0	0.60206	0	0	0	0	0	0	0	0	0	0.30103	0	0	0	0	0	0	0	0	0	0	0	0	0	0	0	0	0	0	0	0	0	0	0	0	0.30103	0	0	0	0	0	0
0	0	0	0	0	0	0	0	0	0	0	0	0.30103	0	0	0	0	0	0	0	0	0	0	0.477121	0	0	0	0	0	0	0	0	0	0	0	0	0	0	0	0	0.30103	0	0.30103	0.477121	0	0	0	0	0	0
0	0	0	0	0.477121	0	0.30103	0	0.778151	0.30103	0	0.778151	0	0	0	0	0	0.477121	0	1.07918	0	0.30103	0	0.845098	0	0	0.30103	0	0	0	0	0	0.778151	0.30103	0	0	0	0.30103	0	0.30103	0.477121	0	0.778151	0.30103	0.90309	0.477121	0.30103	0.30103	0	0
1.30103	0	0	0	0	0.30103	0	0	0.30103	0	0	0	0	0	0	0	0	0	0	0	0	0	1.32222	0	0.90309	0	0	0	0	0	0	0	0	0	0	0	0	0	0	0	0	0	0	0	0	0	0	0	0.30103	0
0	0	0	0	0	0	0	0	0	0	0	0	0	0	0	0	0	0	0	0	0	0	0	0	0	0	0	0	0	0.30103	0	0	0	0	0	0	0	0	0	0	0	0	0	0	0	0	0	0	0	0
0	0	0	0	0	0	0.30103	0	1.17609	0.30103	0	0	0.30103	0	0	0	0	0.30103	0	0.60206	0	0	0	0.30103	0	0	0	0	0	0	0	0	0.30103	0	0	0	0	0.477121	0.778151	0	0.60206	0	0.778151	0.477121	0.477121	0	0.30103	0	0	0
0	0	0	0	0	0	0	0	0	0	0	0	0	0	1.44716	0	0	0	0	0	0	0	0	0	0	0	0	0	0	0	0	0	0	0	0.477121	0	0	0	0	0	0	0	0	0	0	0	0	0	0	0
0	0	0	0	0	0	0	0	0	0	0	0	0	0	0	0	0	0	0	0	0	0	0	0	0	0	0	0	0	0	0	0	0	0	0	0	0	0	0	0	0	0	0	0	0	0	0	0	0	0
1.95424	0	0	0	0	0	0	0	0	0	0	0	0	0	0	0	0	0	0	0	0	0	1	0	0	0	0	0	0	0	0	0	0	0	0	0	0	0	0	0	0	0	0	0.30103	0	0	0	0	0	1.38021
0	0	0	0	0	0	0	0	0	0.30103	0.30103	0	0	0	0	0	0	0	0	0	0	0	0	0	0	0	0	0	0	0	0	0	0	0	0	0	0	0	0	0	0	0	0	0	0.30103	0	0	0	0	0
0	0	0	0	0	0	0	0	0.30103	0	0.30103	0	0	0	0	0	0	0	0.477121	0.477121	0	0	0	0.30103	0	0	0	0	0	0	0	0	0	0	0	0	0	0	0	0	0	0	0	0.60206	0	0	0	0	0	0
0	0	0	0	0	0	0	0	0	0	0	0.30103	0	0	0	0	0	0	0.30103	0	0	0	0	0	0	0	0	0	0	0	0.30103	0	0	0	0	0	0	0.30103	0	0	0	0	0.30103	0	0	0	0	0	0	0
0	0	0	0.30103	0	0	0	0	0	0	0	0	0	0	0	0	0	0	0	0	0	0	0	0	0	0	0	0	0	0	0	0	0	0	0	0	0	0	0	0	0	0	0	0	0	0	0	0	0	0
0	0	0	0	0	0	0	0	0.60206	0.30103	0	0	0.30103	0	0	0	0	0	0	0	0	0	0.30103	0	0	0.30103	0	0	0	0	0.30103	0	0	0	0	0	0	0	0	0	0.30103	0.30103	0.30103	0	0	0	0	0	0	0
0	0	0	0	0	0.30103	0	0	0	0	0	0	0	0	0	0	0	0	0	0	0	0	0	0	0	0	0	0	0	0	0	0	0	0	0	0	0	0	0	0	0	0.60206	0	0	0	0	0.30103	0	0	0
0	0	0	0	0.30103	0	0	0	0.90309	0.30103	0	0.30103	0.477121	0	0	0	0	0	0.90309	0	0	0	0	0.60206	0	0	0	0	0.30103	0	0	0	0.30103	0	0	0	0	0.477121	0.778151	0.30103	0.90309	0	0.477121	0.90309	0.60206	0.30103	0	0.30103	0	0
0	0	0	0.30103	0.30103	0	0.30103	0	1.43136	0.30103	0	0.778151	0	0	0	0	0.30103	0.60206	0.30103	0	0	0	0	0.30103	0.30103	0	0	0	0	0	0	0	0	0	0	0	0	0.30103	0	0	0.60206	0.30103	0	1	0.477121	0	0	0	0	0
0	0	0	0	0	0	0.60206	0	0.90309	0.477121	0.69897	0.30103	0.69897	0	0	0	0	0.30103	0.60206	0.778151	0.477121	0.30103	0	0.90309	0	0.30103	0.477121	0	0	0	0	0	0.30103	0.30103	0	0	0.477121	0.30103	0.30103	0	0.60206	0.778151	1.17609	0.69897	0.60206	0	0	0	0	0
0	0	0	0.30103	0.30103	0	0	0	0	0	0	0	0	0	0	0	0.30103	0	0.30103	0	0	0	0	0	0	0	0	0	0	0	0	0	0	0	0	0	0	0	0.30103	0	0.477121	0	0	0	0	0	0	0	0	0
0	0	0	0	0	0	0	0	0	0	0	0	0	0	0.30103	0	0	0	0	0	0	0	0	0	0	0	0	0	0	0	0	0	0	0	0	0	0	0	0	0	0	0	0	0	0	0	0	0	0	0
0	0	0	0	0.30103	0	0	0	0	0	0	0	0.30103	0	0	0	0	0	0.30103	0	0	0	0	0	0	0	0	0	0	0.30103	0	0	0	0	0	0	0	0	0	0	0	0	0.60206	0	0.477121	0	0.30103	0.30103	0.30103	0
0	0	0	0	0	0	0.477121	0.30103	0.477121	0	0	0.477121	0.30103	0	0	0	0.477121	0	0.60206	0.30103	0	0.30103	0	0.30103	0	0	0.30103	0	0	0.30103	0	0	0	0.30103	0.477121	0	0	0	0	0.30103	0	0.30103	0.30103	0.477121	0	0	0	0	0	0
0	0	0	0	0	0	0	0	0	0	0	0	0	0	0	0	0	0	0	0	0	0	0	0	0	0.30103	0	0	0	0	0	0	0	0	0	0	0	0	0	0	0	0	0	0	0	0	0	0	0	0
0	0	0	0.30103	0	0	0	0	0	0	0	0.30103	0	0	0	0	0	0.477121	0	0	0.30103	0	0	0.30103	0	0.477121	0	0	0	0	0	0	0	0	0	0.30103	3.07918	0	0	0	0.60206	0.30103	0.60206	0.30103	0	0	0.30103	0.477121	0	0
0	0	0	0	0	0	0	0	0	0	0	0	0	0	0	0	0	0	0	0	0	0	0	0.30103	0	0	0	0	0	0	0	0	0	0	0	0	0	0	0	0	0	0	0	0	0	0	0	0	0	0
0	0	0	0	0	0	0	0	0.30103	0	0	0.30103	0	0	0	0	0	0	0.30103	0	0	0.30103	0	0	0	0	0.60206	0	0	0	0	0	0	0	0	0	0	0	0.477121	0	0	0	0.30103	0	0	0	0	0	0	0
0	0	0	0	0.30103	0	0	0	0	0	0	0	0	0	0	0	0	0	0	0	0	0	0	0	0	0	0	0	0	0	0	0	0	0	0	0	0	0	0	0	0	0	0	0	0	0	0	0	0	0
0	0	0	0	0	0	0	0	0	0	0	0	0	0	1.25527	0	0	0	0	0	0	0	0	0	0	0	0	0	0	0	0	0	0	1.20412	4.39298	0	3.19728	0	2.41497	0	0	0	0	0	0	0	0	0	0	0
0	0	0	0	0	0	0	0	0	0	0	0	0	0	0	0	0	0	0	0	0	0	0	0	0	0	0	0	0	0	0	0	0	0	0	0	0	0	0	0	0	0	0	0	0	0	0	0	0	0
0	0	0	0	0	0	0	0	0	0	0	0	0	0	0	0	0	0	0	0	0	0	0	0	0	0	0	0	0	0	0	0	0	0	0	0	0	0	0	0	0	0	0	0	0	0	0	0	0	0
0	0	0	0	0	0	0	0	0	0	0	0	1.60206	0	0.778151	0	0	0	0	0	0	0	0	0	0	0	0	0	0	0	0	0	0	0.30103	3.79741	0	2.52634	0	1.74819	0	0	0	0	0	0	0	0	0	0	0
0	0	0	0	0	0	0	0	0	0	0.30103	0	0	0	0.778151	0	0	0	0	0	0	0	0	0	0	0	0	0	0	0	0	0	0	0.30103	2.44716	0	3.16495	0	0.30103	0	0	0	0	0	0	0	0	0	0	0
0	0	0	0	0	0	0	0	0	0	0	0.30103	0	0	0	0	0	0.60206	0	0	0	0	0	0	0	0	0	0	0	0	0	0	0	0	0	0	0	0	0	0	0	0	0	0	0.30103	0	0	0	0	0
0	0	0	0	0	0.30103	0.477121	0	0.60206	0	0	0.477121	0	0	0	0	0.477121	0	0.477121	0.30103	0.30103	0	0	0.69897	0	0	0	0	0	0	0	0	0.30103	0	0	0	0	0	0.477121	0	0.90309	0.477121	0.69897	0.778151	0.90309	0	0.477121	0	0	0
0	0	0	0	0	0	0	0	0	0	0	0	0	0	0	0	0	0	0	0	0	0	0	0.30103	0	0	0	0	0	0	0.30103	0	0	0	0	0	0	0	0	0	0.30103	0	0	0.30103	0.30103	0	0	0	0	0
0	0	0	0	0	0	0.954243	0.30103	1.54407	0.30103	0	0.90309	0.60206	0	0	0	0.30103	0.778151	1	0.90309	0	0.477121	0	0.60206	0	0	0.477121	0	0	0	0	0	0	0.30103	0	0.477121	0.60206	0.778151	1.32222	0.60206	1.44716	0.778151	1.07918	0.60206	1.17609	0	0	0	0	0
0	0	0	0	0	0	0	0	0	0	0	0	0	0	0	0	0.30103	0	0	0	0	0	0	0	0	0	0.30103	0	0	0	0	0	0	0	0	0	0.30103	0.30103	0	0	0.30103	0	0	0	0	0	0.30103	0.30103	0	0
0	0	0	0	0	0	0	0	0	0	0	0	0	0	0	0	0	0	0	0	0	0	0	0	0	0	0	0	0.30103	0	0	0	0	0	0	0	0	0	0	0	0	0	0	0	0	0	0	0	0	0
2.57749	0	0	0	0	0	0	0	0	0	0	0	0	0	0.954243	0	0	0	0	0	0	0	2.64542	0	1.92428	0	0	0	0	0	0	0	0	0	0	0	1.07918	0	0	0	0	0	0	0	0	0	0	0	0	2.29003
0	0	0	0	0	0	0	0	0.60206	0	0	0.30103	0	0	0	0	0	0.30103	0	0	0	0	0	0.30103	0	0	0	0	0	0	0	0	0	0	0	0	0	0	0.30103	0	0.778151	0.778151	0.60206	0	0.477121	0	0.30103	0	0	0
0	0	0.30103	0	0	0	0	0	0.477121	0	0	0.30103	0	0	0	0	0	0.30103	0	0	0	0	0	0.477121	0	0	0	0	0	0	0	0	0	0	0	0	0	0.30103	0	0	0	0	0	0	0.30103	0	0.30103	0	0	0
0	0	0	0	0	0	0	0	0	0	0	0	0	0	0	1.07918	0	0	0	0	0	0	0	0	0	0	0	0	0	0	0	0.30103	0	0	0	0	0	0	0	0	0	0	0	0	0	0	0	0	0	0
1.50515	0	0	0	0	0	0	0	0.30103	0	0	0	0	0	0	0	0.69897	0	0	0	0	0	2.617	0.30103	2.57403	0	0	0	0	0	0	0	0.30103	1.25527	2.57978	0	0	0	0	0	0.90309	0	0	0.30103	0.30103	0	0	0	0	1.20412
0	0	0	0	0	0	0	0	0	0	0	0	2.14613	0	0.477121	0	0	0	0	0	0	0	0	0	0	0	0	0	0	0	0	0	0	1.07918	2.77815	0	0	0	0	0	0	0	0	0	0	0	0	0	0	0
0	0	0	0	0	0	0	0	0.30103	0	0	0	0	0	0	0	0	0	0	0	0	0	0	0	0	0	0	0	0	0	0	0	0	0	0	0	0	0	0	0.30103	0	0	0	0	0	0	0	0	0	0
0	0	0	0	0	0	0	0	0.30103	0	0	0	0	0	0	0	0	0	0	0.30103	0	0	0	0.477121	0	0	0	0	0	0	0.30103	0	0	0	0	0	0	0	0	0	0	0	0	0	0	0	0	0	0	0
0	0	0	0	0	0	0	0	0	0	0	0	0	0	0	0	0	0	0	0	0	0	0	0	0	0	0	0	0	0	0	0	0	0	0	0	0	0	0	0	0	0	0	0	0	0	0	0	0	0
0	0	0	0	0	0	0	0	0	0.30103	0	0	0	0	0	0	0	0	0.60206	0	0	0	0	0	0	0	0	0	0	0	0	0	0	0	0	0	0	0.30103	0	0	0	0	0.477121	0	0.30103	0	0	0	0	0
0	0	0	0.30103	0.477121	0.30103	0.477121	0.30103	0.477121	0	0.30103	0.60206	0	0	0.30103	0.30103	0.30103	0.30103	0.30103	0	0	0	0.30103	0.30103	0	0	0	0	0.30103	0	0	0	0.30103	0	0	0.477121	0.477121	0.60206	0.30103	0	0.477121	0	0	0	0.30103	0	0.30103	0	0	0
0	0	0	0	0	0	0	0	0.477121	0	0	0.30103	0.30103	0	0	1.07918	0	0	0.30103	0	0	0	0	0.60206	0	0	0	0	0	0.30103	0	0	0	0	0	0	0	0.30103	0.30103	0	0.60206	0.477121	0.90309	0.778151	0.30103	0	0	0	0	0
0	0	0	0	0	0.30103	0	0.477121	0.30103	0.60206	0	0.30103	0	0	0.30103	0	0	0.477121	0	0	0	0	0	0.30103	0	0	0	0	0.30103	0	0	0	0	0	0	0	0	0.30103	0	0.60206	0.477121	0	0	1.07918	0	0	0.30103	0	0	0
0	0	0	0	0	0	0	0	0	0	0	0	0	0	0.30103	0	0	0	0	0	0	0	0	0	0	0	0	0	0	0	0	0	0	0	0	0	0	0	0	0	0	0	0	0	0	0	0	0	0	0
0	0	0	0	0	0	0	0	0	0	0	0	0	0	0	0	0	0.30103	0	0	0	0	0	0	0.778151	0	0.30103	0	0	0	0	0	0	0	0	0	0.477121	0	0	0	0	0	0	0	0	0	0	0	0	1.07918
2.57287	0	0	0	0	0	0	0	0	0	0.30103	0	0	0	0	0	0	0	0	0	0	0.30103	2.16732	0	1.20412	0	0	0	0	0	0	0	0	0	0	0	1.95424	0	0.30103	0	0.477121	0	0	0.30103	0	0	0	0	0	0.30103
0	0	0	0	0	0	0	0	0	0	0	0	0	0	0	0	0	0	0	0	0	0	0	0	0	0	0	0	0	0	0	0	0	0	0	0	0	0	0	0	0	0	0	0.30103	0	0	0	0	0	0
0	0	0	0	0	0	0	0	0.30103	0	0	0	0	0	0	0	0	0	0.30103	0.30103	0	0	0	0.30103	0	0	0.30103	0	0	0	0	0	0	0	0	0	0	0	0	0	0.30103	0	0	0.477121	0	0	0.30103	0	0	0
0	0	0	0.30103	0	0	0	0	0.69897	0	0	1.07918	0.60206	0	0	0	0	0.30103	0.30103	0.30103	0	0	0	0	0	0	0.60206	0	0	0	0	0.30103	0.477121	0	0	0	0	0	0.477121	0	0.954243	0.30103	0.60206	0.60206	0.954243	0.30103	0	0	0	0
0	0	0	0	0	0	0.60206	0	0.69897	0.30103	0.30103	0	0.30103	0	0	0	0	0	0.477121	0.30103	0	0	0	0.30103	0	0	0	0	0.30103	0	0.477121	0	0	0	0	0	0	0.30103	0.60206	0	0.30103	0.30103	0.30103	0.477121	0.60206	0	0.30103	0	0.30103	0
0	0	0	0	0	0	0	0	0	0	0	0	0	0	0	0	0	0	0	0	0	0	0	0	0	0	0	0	0	0	0	0	0	0	0	0	0	0	0	0	0	0	0	0	0	0	0	0	0	0
0	0	0	0.30103	0	0	0	0	0	0	0	0	0	0	0	0	0	0.30103	0	0	0	0	0	0	0	0	0	0	0	0	0	0	0	0	0	0	0	0	0	0	0.30103	0.30103	0	0	0.477121	0	0.477121	0	0	0
0	0	0	0	0	0	0	0	0.477121	0	0	0	0	0	0	0	0	0	0	0	0	0	0	0	0	0	0	0	0	0	0	0	0	0	0	0	0	0	0	0	0.30103	0	0	0	0.30103	0	0.30103	0	0	0
0	0	0	0	0.30103	0	0	0	0.778151	0.30103	0	0.30103	0.477121	0	0	0	0.30103	0	0.30103	0	0.30103	0.30103	0.30103	0.60206	0	0	0	0	0	0	0	0	0.30103	0	0	0	0	0	1.07918	0	1.20412	0.30103	1.30103	0.778151	0.30103	0	0.30103	0.30103	0	0
0	0	0	0	0	0.477121	0.60206	0	0.60206	0	0	0.60206	0	0	0.477121	0	0	0	0.30103	0	0	0	0	0.778151	0	0	0.30103	0	0	0	0	0	0.60206	0	0	0	0	0	0.778151	0	0.778151	0.477121	0.778151	0.954243	0	0	0.30103	0	0	0
0	0	0	0	0	0	0	0	0.477121	0	0	0	0	0	0	0	0	0	0	0	0	0	0	0.60206	0	0	0	0	0	0.30103	0	0	0	0	0	0	0	0	0	0	0	0	0	0.30103	0	0	0.30103	0	0	0
0	0	0	0	0	0	0	0	0	0	0	0	0	0	0	0.778151	0	0.30103	0	0	0	0	0	0	0	0	0.30103	0	0	0	0	0	0	0	0	0	0	0	0	0	0	0	0	0	0	0	0	0	0	0
0	0	0	0	0	0	0	0	0	0	0.30103	0	0	0	0	0	0	0	0.60206	0.30103	0	0	0	0	0	0	0	0	0	0	0.30103	0	0	0	0	0	0	0	0	0	0.69897	0.30103	0.30103	0	0	0	0	0	0	0
0	0	0	0	0	0	0	0	0	0	0	0	0	0	0	0	0	0	0	0	0	0	0	0	0	0.30103	0	0	0	0	0	0	0	0	0	0	0	0	0	0	0	0	0	0	0	0	0	0	0	0
0	0	0	0	0	0	0	0	0	0	0	0	0	0	0	0	0	0.30103	0.477121	0.30103	0	0	0	0	0	0	0.30103	0	0	0	0	0	0	0	0	0	1.8451	0	0	0	0.477121	0	0	0	0.30103	0	0	0	0	0
0	0	0	0	0	0	0	0	0	0	0	0	0	0	0	0	0	0	0	0	0	0	0	0.30103	0	0	0	0	0	0	0	0	0	0	0	0	0	0	0	0	0	0.30103	0	0	0	0	0	0	0.60206	0
0	0	0	0	0	0	0	0.477121	0.477121	0	0	0.60206	0	0	0	0	0.477121	0	0	0.60206	0	0	0	0.69897	0	0.30103	0.30103	0	0.477121	0	0.477121	0	0	0.30103	0	0	0	0.69897	0.69897	0.30103	0.60206	0.30103	0.69897	1.07918	0.477121	0	0	0	0	0
0	0	0	0	0	0	0	0.30103	1.07918	0.477121	0	0.30103	0	0	0	0	0.477121	0	0	0	0.477121	0.477121	0	0.30103	0	0	0.30103	0	0	0	0	0	0.30103	0	0	0	0	0	1.20412	0	0.477121	0.477121	1.47712	0.778151	0.30103	0	0	0	0	0
0	0	0	0	0	0	0.30103	0	0.477121	0	0	0	0	0	0	0	0	0	0	0.30103	0	0	0	0	0	0	0	0	0	0	0	0	0	0	0	0	0	0.30103	0.30103	0	0	0.778151	0.30103	0.30103	0	0	0.30103	0	0.30103	0
0	0	0	0	0	0	0	0	0.477121	0	0	0	0	0	0.30103	0.477121	0	0	0	0	0	0	0	0.30103	0	0	0	0	0	0	0	0	0	0.30103	0	0	0	0	0	0	0	0	0.30103	0.30103	0	0	0	0	0	0
0	0	0	0	0	0	0	0.30103	0	0	0	0.30103	0.477121	0	0	0	0	0.477121	0.69897	0.60206	0.30103	0	0	0	0	0	0.30103	0	0	0	0	0	0.30103	0	0	0	0	0.477121	0	0	1.17609	0	0.30103	0.477121	0	0	0	0	0	0
0	0	0	0	0	0	0.30103	0.30103	0.90309	0	0	0	0	0	0	0	0	0	0	0.30103	0	0	0	0.30103	0	0	0.30103	0	0	0	0	0	0	0	0	0	0	0.30103	0	0	0.30103	0	0	0.30103	0	0	0.30103	0	0	0
0	0	0	0	0	0	0	0.60206	0.30103	0	0	0	0	0	0	0	0	0	0	0	0	0	0	0	0	0	0	0	0	0	0	0	0	0	0	0	0	0.30103	0	0	0.30103	0	0	0.778151	0	0	0	0	0	0
0	0	0	0	0.30103	0	0	0	0.30103	0	0	0	0.30103	0	0	0	0	0	0	0	0	0	0	0	0	0.30103	0	0	0	0	0	0	0	0	0	0	0	0	0	0	0	0	0	0.30103	0.477121	0	0	0	0	0
0	0	0	0	0.30103	0	0	0	0	0	0	0	0	0	0	0	0	0	0	0	0	0	0	0	0	0	0	0	0	0	0	0	0	0	0	0	0.30103	0	0	0	0	0	0.30103	0.60206	0	0	0	0	0	0
0	0	0	0	0	0	0.30103	0	0.90309	0	0.30103	0	0.477121	0	0	0	0	0	0	0	0	0	0	0	0	0	0	0	0.60206	0	0	0	0	0	0	0	0	0	0.30103	0	0.30103	0.30103	0.69897	0.69897	0.477121	0	0.778151	0	0.30103	0
0	0	0	0	0	0	0	0	0.778151	0	0	0	0.30103	0	0	0	0	0.30103	0.30103	0	0	0	0	0.30103	0	0	0	0	0	0	0	0	0	0	0	0	0	0	0	0	0.30103	0.30103	0	0.30103	0.60206	0	0	0	0	0
0	0	0	0	0	0	0	0	0	0	0	0	0	0	0	0	0	0	0	0	0	0	0	0	0	0	0	0	0	0	0	0	0	0	0	0	0	0	0	0	0	0	0	0	0	0	0	0	0	0
0	0	0	0	0	0	0	0	0	0	0	0	2.34439	0	0.477121	0	0	0	0	0	0	0	0	0	0	0.30103	0	0	0	0	0	0	0	0	0.60206	0	0	0	0	0	0	0	0	0	0	0	0	0	0	0
0	0	0	0	0	0	0	0	0	0	0	0.778151	1.88649	0	2.44091	0	0	0	0	0	0	0	0	0	0	0	0	0	0	0	0	0	0	0.954243	2.72016	0	0	0	2.35218	0	0	0	0	0	0	0	0	0	0	0
0	0	0	0	0	0	0	0	0.60206	0	0	0	0	0	0	0	0	0.477121	0	0	0	0	0	0	0	0	0	0	0	0	0.30103	0	0	0	0	0	0	0	0	0	0.477121	0	0.30103	0	0.30103	0	0	0.30103	0	0
0	0	0	0	0	0	0.30103	0	0.477121	0	0	0	0	0	0	0	0	0	0	0.30103	0	0	0	0.30103	0	0	0	0	0	0	0.30103	0	0.477121	0	0	0.30103	0	0	0	0	0.477121	0	0.60206	0.778151	0.477121	0	0.477121	0.30103	0	0
0	0	0	0	0	0	0	0	0	0	0	0	0	0	0	0	0	0.30103	0.30103	0	0	0	0	0	0	0	0	0	0	0	0	0	0.30103	0	0	0	0	0.30103	0.60206	0	0.30103	0.30103	0.477121	0	0	0	0	0	0	0
0	0	0	0	0	0	0	0	0	0	0	0	0	0	0	0	0	0	0	0	0	0	0	0	0	0	0	0	0	0	0	0	0	0	0	0	0	0	0	0.30103	0	0	0	0	0.30103	0	0.60206	0	0	0
0	0	0	0	0	0	0	0	0	0	0	0	0	0	0	0	0	0	0	0	0	0	0	0	0	0	0	0	0	0	0	0	0	0	0	0	0	0	0.30103	0	0	0	0	0	0	0	0	0	0	0
0	0	0	0	0.30103	0	0	0.477121	0	0.30103	0	0	0	0	0	0	0	0	0	0	0	0	0	0.477121	0	0	0	0	0	0	0	0	0.30103	0	0	0.477121	0	0	0	0	0	0	0	0.30103	0	0	0	0	0	0
0	0	0	0	0.30103	0.30103	0	0	0.60206	0	0	0	0.60206	0	0.30103	0	0.30103	0	0	0.60206	0	0.30103	0	0	0	0	0	0	0.30103	0	0	0	0	0	0	0.30103	0	0.30103	0	0.60206	0	0.60206	0.30103	0.30103	0.778151	0	0	0	0	0
0	0	0	0.30103	0	0	0.30103	0.30103	0.30103	0	0	0.30103	0	0	0	0	0	0	0.477121	0	0.30103	0	0	0.778151	0	0	0.30103	0	0	0	0	0	0	0	0	0.30103	0	0	0.60206	0	0	0.477121	0.60206	0.477121	0	0	0	0	0	0
0	0	0	0	0	0	0	0	0.30103	0	0	0	0	0	0	0	0	0	0.30103	0.477121	0	0	0	0.477121	0	0	0	0	0	0	0	0	0	0	0	0	0	0.30103	0	0	0.60206	0	0	0	0.60206	0	0	0	0	0
0	0	0	0	0	0	0	0	0	0	0	0	0	0	0	0	0	0	0	0	0	0	0	0	0	0	0	0	0	0	0	0	0	0	0	0	0	0	0	0	0	0	0	0	0	0	0	0	0	0
0	0	0	0	0	0	0.30103	0	0.60206	0	0	0	4.25419	0	1.99564	0	0	0	0	0	0	0	0	0	0.30103	0.30103	0	0	0	0	0	0	0	0.778151	2.59218	0	0	0	0.954243	0	0.90309	0.477121	0	0	0.477121	0	0.477121	0	0	0.30103
0	0	0	0	0	0	0	0.60206	0.778151	0	0	0.30103	0.30103	0	0.477121	0	0.30103	0	0	0.477121	0	0	0	0.30103	0	0	0.30103	0	0.30103	0	0	0.30103	0.30103	0	0.30103	0.30103	0	0.477121	2.70415	0.60206	0.60206	0.30103	0.60206	0.477121	0.954243	0	0	0	0	0
0	0	0	0	0	0.30103	0	0	0.90309	0	0	0	0	0	0	0	0	0	0	0	0	0	0	0	0	0	0	0	0	0	0	0	0	0	1.07918	0	0	0	0.30103	0	0	0	0.30103	0	0.30103	0	0	0	0	0
0	0	0	0.30103	0	0	0	0	0	0	0	0.477121	0	0	0	0	0	0	0	0	0	0	0	0	0	0	0	0	0	0	0	0	0.477121	0	0	0	0	0.477121	0	0	0.30103	0	0.477121	0.30103	0	0	0	0	0	0
0	0	0	0	0	0	0	0	0.30103	0	0	0	0	0	0	0	0	0	0.30103	0	0	0	0	0.30103	0	0	0	0	0	0	0	0	0.30103	0	0	0	0	0	0	0	0	0	0	0	0	0	0	0	0	0
0	0	0	0.477121	0	0	0.778151	0	0.60206	0.30103	0.30103	0	0.30103	0	0.477121	0	0.477121	0.60206	0.60206	0.60206	0	0.477121	0	1.38021	0	0	0.30103	0	0.477121	0.30103	0.778151	0	0.30103	0.60206	0.30103	0	0	0.30103	0.778151	0.60206	1.30103	0.477121	0.778151	0.845098	0.90309	0	0	0.477121	0.60206	0
0	0	0	0	0	0	0	0	0	0	0	0.30103	0	0	0	0	0	0	0	0	0	0	0	0	0	0	0	0	0	0	0	0	0	0	0	0	0	0	0	0	0	0	0	0.30103	0	0	0	0	0	0
0	0	0	0	0	0	0	0	0	0	0	0	0	0	0	0	0	0	0	0	0	0	0	0	0	0	0	0	0	0	0	0	0	0	0	0	0	0	0	0	0.30103	0	0	0	0	0	0	0	0	0
0	0	0	0	0	0	0	0	0.954243	0	0	0.954243	0	0	0	0	0	0	0	0	0	0.30103	0	0.30103	0	0	0	0	0	0	0	0	0.30103	0	0	0	0	0	0	0	0	0	0.60206	0	0	0.30103	0	0	0	0
0.30103	0	0	0	0	0	0	0	0	0	0	0	0	0	0	0	0	0	0	0	0	0	0	0	0	0	0	0	0	0	0	0	0	0	0	0	0	0	0	0	0	0	0	0	0	0	0	0	0	0
0	0	0	0	0	0	0	0	0	0	0	0	0	0	0	0	0	0	0	0	0	0	0	0	0	0	0	0	0	0	0	0	0	0	0	0	0	0	0	0	0	0	0	0	0	0	0	0	0	0
0	0	0	0	0	0	0	0	0	0	0	0	2.62839	0	1.87506	0	0	0	0	0	0	0	0	0	0	0	0	0	0	0	0	0	0	0.30103	1.50515	0	0	0	0	0	0	0	0	0	0	0	0	0	0	0
0	0	0	0	0	0	0.30103	0	0	0	0	0	0	0	2.7356	0	0	0	0	0	0	0	0	0.30103	0	0	0.477121	0	0	0	0	0	0	2.51055	2.5977	0	0.778151	0	1.07918	0	0	0.30103	0	0	0	0	0	0	0	0
0	0	0	0	0	0	0	0	0	0	0	0	0	0	0	0	0	0	0	0	0	0	0	0	0	0	0	0	0	0	0	0	0	0	0	0	0	0	0	0	0	0	0	0	0	0	0	0	0	0
0	0	0	0	0	0	0	0	0	0	0	0	0	0	0	0	0	0.30103	0	0	0	0	0	0	0	0	0	0	0	0	0	0	0.30103	0	0	0	0	0	0	0	0	0	0	0	0	0	0	0	0	0
0	0	0	0	0	0	0	0.477121	0.30103	0.30103	0.30103	0	0	0	0	0	0	0	0.30103	0.778151	0	0	0	0.30103	0	0	0	0	0	0	0.30103	0	0	0	0	0	0	0	0	0	0.30103	0	0	0.30103	0.30103	0	0	0	0	0
0	0	0	0	0	0.30103	0	0	0	0	0	0	0	0	0	0	0	0	0.30103	0	0	0	0	0	0	0	0	0	0	0	0	0	0.30103	0	0	0	0	0	0	0	0	0	0	0.30103	0	0	0	0	0	0
0	0	0	0	0	0	0.30103	0	0.778151	0.30103	0	0.477121	0	0	0	0	0	0.477121	0	0.778151	0	0	0	1.30103	0	0	0	0	0	0	0	0	0	0	0	0	0	0.30103	0	0	0.60206	0.477121	1.20412	0.477121	0.90309	0.30103	0.30103	0.30103	0	0
0	0	0	0	0.30103	0	0	0	0	0	0.30103	0	0	0	0	0	0	0	0	0	0	0	0	0	0	0	0	0	0	0	0.477121	0	0	0	0	0	0	0	0	0	0.30103	0	0	0	0	0	0	0	0	0
0	0	0	0.30103	0.30103	0	0.477121	0.30103	0.90309	0	0	0	0	0	0.30103	0	0.30103	0.90309	0.30103	0.30103	0	0	0	0.30103	0	0	0.30103	0	0	0	0	0	0	0	0	0	0	0.30103	0.30103	0	0.60206	0.30103	1	0.954243	0.90309	0	0.60206	0	0	0
1.30103	0	0	0	0	0	0	0	0	0	0	0	0	0	0	0	0	0	0	0	0	0	0	0	0	0	0	0	0	0	0	0	0	0	0	0	1.50515	0	0	0	0	0	0	0	0	0	0	0	0	0
0	0	0	0	0	0	0	0.30103	0.30103	0	0	0.30103	0	0	0	0	0	0.30103	0	0.30103	0	0	0	0.30103	0	0	0	0	0	0	0	0	0.30103	0	0	0	0	0	0	0	0	0	0.60206	0.30103	0.60206	0.477121	0.30103	0	0	0
0	0	0	0	0	0	0	0	0	0	0	0	0	0	0	0	0	0	0	0	0	0	0	0	0	0	0	0	0	0	0	0	0	0	0	0	0	0	0	0	0	0	0	0	0	0	0	0	0	0
0	0	0	0	0	0	0	0	0	0	0	0	0	0	0	0	0	0	0	0	0	0	0	0	0	0	0	0	0	0	0	0	0	0	0	0	0	0	0	0	0	0	0	0	0	0	0	0	0	0
0	0	0	0	0	0	0.30103	0.477121	0.778151	0	0.30103	0.30103	2.9248	0	3.04922	0	0	0	0.30103	0.30103	0	0	0	0.30103	0	0	0	0	0	0	0	0	0.30103	2.43616	3.05956	0	0.477121	0	0.778151	0	0.477121	0.477121	0.477121	0.30103	0.30103	0	0.60206	0	0	0
0	0	0	0	0	0	0	0	0	0	0	0	0	0	0	0	0	0	0	0	0	0	0	0	0	0	0	0	0	0	0	0	0	0	0	0	0	0	0	0	0	0	0	0	0	0	0	0	0	0
0	0	0	0	0	0	0	0	0	0	0	0.30103	0.477121	0	0	0	0	0.477121	0	0	0	0	0	0.30103	0	0	0	0	0	0	0	0	0	0.477121	0	0	0	0	0	0	0.60206	0	0	0	0	0	0	0	0	0
0	0	0	0	0	0	0	0	0	0	0	0	0	0	0	0	0.30103	0	0	0	0	0.30103	0	0	0	0	0	0	0	0	0	0	0	0	0	0	0	0	0	0	0.30103	0.30103	0	0	0	0	0	0	0	0
0	0	0	0	0	0	0	0	0.30103	0	0	0	0	0	3.8379	0	0	0	0.30103	0	0	0	0	0.30103	0	0	0.477121	0	0	0	0	0	0	0	0	0	0	0	0	0	0.477121	0	0.30103	0.477121	0	0	0	0	0	0
0	0	0	0	0	0	0	0	0	0	0	0	0	0	0	0	0	0	0	0	0	0	0	0	0	0	0	0	0	0	0	0	0	0	0	0	0	0	0	0	0	0	0	0	0	0	0.30103	0	0	0
2.48287	0	0	0	0	0	0	0	0	0	0	0	0	0	0	0	0	0	0	0	0	0	2.56585	0	1.94448	0	0	0	0	0	0	0	0	0	0	0	0.477121	0	0	0	0	0	0	0	0	0	0	0	0	2.20952
0	0	0	0	0	0	0	0	0.477121	0	0	0.30103	0	0	0	0	0	0	0	0	0	0	0	0	0	0	0	0	0	0	0	0	0	0	0	0	0	0	0	0.60206	0	0	0	0	0	0	0	0	0	0
0	0	0	0	0	0	0	0	0	0	0	0	0	0	0	0	0	0.30103	0	0	0	0	0	0	0	0	0	0	0	0	0	0	0	0	0	0	0	0	0	0	0	0	0	0	0	0	0	0	0	0
0	0	0	0	0	0	0	0	0	0	0	0	0	0	0	0	0	0	0	0	0	0	0	0	0	0	0	0	0	0	0	0	0	0	0.778151	0	0	0	0	0	0	0	0	0	0	0	0	0	0	0
0	0	0	0	0	0	0.90309	0	0	0	0	0	0.30103	0	0	0	0	0	0	0	0	0	0	0	0	0	0	0	0	0	0	0	0	0	0	0	0	0	0	0	0	0	0	0	0	0	0	0	0	0
0	0	0	0	0	0	0	0	0	0	0	0	0	0	0	0	0	0	0	0	0	0	0	0	0	0	0	0	0	0	0	0	0	0	0	0	0	0	0	0	0	0	0	0	0	0	0	0	0	0
0	0	0	0	0	0	0	0.30103	0	0	0	0	0	0	0	0	0	0	0	0	0	0	0	0	0	0	0	0	0	0	0	0	0	0	0.477121	0	0	0	0	0	0	0	0	0.30103	0	0	0	0.30103	0	0
0	0	0	0	0	0	0	0	0.60206	0.60206	0	0.30103	0	0	0.30103	0	0.30103	0.30103	0	0	0	0.30103	0	0.477121	0	0	0	0	0	0	0	0	0.30103	0	0	0	0	0	0.30103	0	0.90309	0.30103	0.90309	0	0.30103	0	0.30103	0	0	0
0	0	0	0	0	0	0	0	0.30103	0	0	0	0	0	0	0	0	0.60206	0	0	0	0	0	0.30103	0	0	0.30103	0	0	0	0	0	0	0	0	0	0	0	0	0	0.30103	0	0.30103	0.30103	0.30103	0	0	0	0	0
1.65321	0	0	0	0	0	0	0	0	0	0	0	0	0	0	0	0	0	0	0	0	0	0	0	0.30103	0.30103	0	0	0	0	0	0	0	0	0	0	0.30103	0	0	0	0	0	0	0	0	0	0	0	0	1
0.477121	0	0	0	0	0	0	0	0.477121	0	0	0	0	0	0	0	0	0	0	0	0.30103	0	0	0.477121	0	0.477121	0	0	0	0	0	0	0	0	0	0	0	0	0	0	0	0	0	0	0	0	0	0	0	0
0	0	0	0	0	0	0	0	0	0	0	0	0	0	0	0	0	0	0	0	0	0	0	0.30103	0	0	0	0	0	0	0	0	0	0	0	0	0	0	3.04766	0.30103	0	0	0	0.30103	0	0	0	0	0	0
0	0	0	0	0	0	0.30103	0.30103	0.477121	0.30103	0	0	0.30103	0	0.30103	0	0	0	0	0	0	0	0	0	0	0	0	0	0	0	0	0	0	0.30103	0	0	0	0	0	0	0	0	0	0.778151	0	0	0	0	0	0
0	0	0	0	0	0	0.30103	0	0.30103	0	0	0	0	0	0	0	0	0	0	0	0	0	0	0	0	0	0	0	0	0	0	0	0	0	0	0.69897	0	0	0	0	0	0.30103	0	0	0	0	0	0	0	0
0	0	0	0	0	0	0	0	0	0	0	0.477121	0	0	0	0	0	0	0	0	0	0	0	0	0	0	0.30103	0	0	0	0	0	0	0	0	0	0	0	0	0	0.60206	0	0.477121	0	0	0	0	0	0	0
0	0	0	0	0	0	0	0	0.477121	0	0	0	0	0	0	0	0	0.30103	0	0	0	0.30103	0	0.30103	0	0	0	0	0	0	0	0	0	0	0	0	0	0	0	0	0	0	0	0.30103	0	0	0	0	0.30103	0
0	0	0	0	0	0	0	0	0.30103	0	0.30103	0.30103	0	0	0	0	0	0	0	0	0	0	0	0	0	0	0	0	0	0	0	0	0.30103	0	0	0	0	0	0	0.30103	0	0	0	0	0.30103	0	0	0	0	0
0	0	0	0	0	0	0	0.30103	0.30103	0	0	0.778151	0.30103	0	0	0	0	0.30103	0.60206	0.30103	0.30103	0	0	0	0	0	0	0	0	0	0.60206	0	0	0	0	0	0	0.30103	0	0	0	0.30103	0.778151	0.60206	0.477121	0	0	0	0	0
0	0	0	0	0	0	0	0	0	0	0	0	0	0	0	0	0	0	0	0	0	0	0	0	0	0	0	0	0	0	0	0	0	0	0	0	0	0	0	0	0	0	0	0	0	0	0	0	0	0
2.81954	0	0	0	0	0	0	0	0	0	0	0	0	0	0	0	0	0	0	0	0	0	2.45484	0	1.47712	0	0	0	0	0	0	0	0	0	0	0	1.65321	0	0	0	0	0	0	0	0	0	0	0	0	1.17609
0	0	0	0	0	0	0	0	0	0	0	0	0	0	0	0	0	0	0	0	0	0	0	0	0	0	0	0	0	0	0	0	0	0	0	0	0	0	0	0	0	0	0	0	0	0	0	0	0	0
0	0	0	0	0	0	0	0	0	0	0	0.30103	3.93349	0	0	0	0	0	0	0	0	0	0	0	0	0	0	0	0	0	0	0	0	0	0	0	0	0	0	0	0	0	0	0.60206	0	0	0	0	0	0
0	0	0	0	0.30103	0	0	0	0	0	0	0	0	0	0	0.30103	0	0	0	0	0	0	0	0	0	0	0	0	0	0	0.30103	0	0	0	0	0	0	0.30103	0	0	0	0	0.60206	0	0.30103	0	0	0	0	0
0	0	0	0	0.477121	0	0	0	0	0.30103	0	0	0.30103	0	0.30103	0	0	0	0	0	0	0	0	0	0	0	0	0	0	0	0	0	0	0	0	0	0	0	0	0	0	0	0	0	0	0	0	0	0	0
0	0	0	0	0	0	0	0	0	0	0	0	0	0	0	0	0	0	0	0	0	0	0	0	0	0	0	0	0	0	0	0	0	0	0	0	0	0	0	0	0	0	0	0	0	0	0	0	0	0
0	0	0	0	0	0	0	0	0	0	0	0	0	0	0	0	0	0	0	0	0	0	0	0	0.954243	0	0	0	0	0	0	0	0	0	0	0	1.38021	0	0	0	0	0	0	0	0	0	0	0	0	1.25527
2.20952	0	0	0	0	0	0.60206	0	0.30103	0	0.30103	0	0.30103	0	0.30103	0	0	0.30103	0	0	0	0.30103	2.22789	0.30103	1.54407	0.477121	0	0	0	0	0	0	0	0	0	0	2.04139	0	0	0	0	0	0	0	0.30103	0	0	0	0.30103	2.35025
0	0	0	0	0	0.30103	0	0	0	0	0	0	0	0	0	0	0	0.30103	0.477121	0	0	0	0	0	0	0	0	0	0	0	0	0	0	0	0	0	0	0	0	0	0.30103	0	0.30103	0.60206	0.477121	0	0.30103	0	0	0
0	0	0	0	0	0	0	0	0	0	0	0.30103	0	0	0	0	0	0	0.30103	0	0	0	0	0	0	0	0	0	0	0	0	0	0	0	0	0	0	0	1.20412	0	0	0	0.30103	0.30103	0	0	0	0	0	0
0	0	0	0	0	0	0	0	0	0	0	0	0.90309	0	0	0	0	0	0	0	0	0	0	0	0	0	0	0	0	0	0	0	0	0	0.30103	0	0	0	1.5563	0	0	0	0	0	0	0	0	0	0	0
0	0	0	0	0	0	0	0	0	0	0	0	0	0	0.30103	0	0	0	0	0	0	0	0	0	0	0	0	0	0	0	0	0	0	0.30103	0	0	0	0	0	0	0	0	0	0	0	0	0	0	0	0
0	0	0	0	0	0	0	0	0.30103	0	0	0	0	0	0	0	0	0	0	0	0	0	0	0	0	0	0	0	0	0	0	0	0	0	0	0	0	0	0	0	0	0	0	0	0	0	0	0	0	0
0.477121	0	0	0	0	0	0	0	0	0	0	0	0	0	0	0	0	0	0	0	0	0	1.90849	0	1.30103	0	0	0	0	0	0	0	0	0	0	0	1.88649	0	0	0	0	0	0.30103	0	0	0	0	0	0	0.90309
0	0	0	0	0	0	0	0.30103	0.30103	0	0	0	4.02551	0	0.778151	0	0	0	0.477121	0.30103	0	0	0.30103	0	0	0	0.30103	0	0	0	0	0.30103	0	0	1.20412	0	0.30103	0	0.30103	0	0	0	0	0	0	0	0	0	0	0
0	0	0	0	0	0	0	0	0	0	0	0	0	0	2.15836	0	0	0	0	0.30103	0	0	0	0	0	0	0	0	0	0	0	0	0	0.69897	2.03342	0	0	0	2.98272	0	0	0	0	0	0	0	0	0	0	0
0	0	0	0	0	0	0	0	0.30103	0	0	0	0	0	0	0	0.30103	0	0	0	0	0	0	0.30103	0	0	0	0	0	0	0	0	0	0	0	0	0	0	1.60206	0	0	0	0	0	0	0	0.30103	0	0	0
0	0	0	0	0	0	0	0	0	0	0	0	0	0	0	0	0	0	0	0	0	0	0	0	0	0	0	0	0	0	0	0	0	0	0	0	0	0	0	0	0	0	0	0	0	0	0	0	0	0
0	0	0	0	0	0	0	0	0	0	0	0	0	0	0	0	0	0	0	0	0	0	0	0	0.69897	0.30103	0	0	0	0	0	0	0	0	0	0	1.14613	0	0	0	0	0	0	0	0	0	0	0	0	1.07918
0	0	0	0	0	0	0	0	0	0	0	0	3.5193	0	1.38021	0	0	0.30103	0	0	0	0	0	0	0	0.30103	0	0	1.32222	0	0	0	0	0.90309	2.68395	0	0	0	0	0	0	0	0.30103	0	0	0	0	0	0	0
0	0	0	0	0	0	0	0	0.778151	0	0	1.95424	3.07555	0	1.89209	0.60206	0	0	0	0	0	0	0	0	0	0	0.30103	0	0	0	0	0	0	2.02119	3.471	0	0.30103	0.30103	2.62325	0	0	0	0.30103	0	0	0	0	0	0	0
0	0	0	0	0	0	0	0	0.30103	0	0.30103	1.5563	0	0	1.47712	0	0	0	0	0	0	0	0	0	0	0	0	0	0	0	0	0	0	1.32222	2.19312	0	0	0	0	0	0.30103	0	0	0	0	0	0	0	0	0
0	0	0	0	0	0	0	0	0	0	0	0	0	0	0	0	0	0	0	0	0	0	0	0	0	0	0	0	0	0	0	0	0	0	0	0	0	0	0	0	0	0	0	0	0	0	0	0	0	0
0	0	0	0	0	0	0	0	0	0	0	0	0	0	0	0	0.30103	0	0	0	0	0	0	0	0	0	0	0	0	0	0	0	0	0	0	0	0	0	0	0	0	0	0.30103	0	0	0	0	0	0	0
0	0	0	0	0	0	0	0	0	0	0	0	0	0	0	0	0	0	0	0	0	0	0	0	0.778151	0	0	0	0	0	0	0	0	0	0	0	2.15534	0	0	0	0	0	0	0	0	0	0	0	0	0.60206
0	0	0	0	0	0	0	0	0	0	0	0	0	0	0	0	0	0	0	0	0	0	0	0	0	0.477121	0	0	0	0	0	0	0	0	0	0	0	0	0	0	0.477121	0	0	0.30103	0	0	0	0	0	0
0	0	0	0	0	0	0.30103	0	1.30103	0.30103	0	0.30103	0.778151	0	0	0	0	0.477121	0.30103	0.60206	0	0	0	0.30103	0	0	0	0	0	0	0	0	0.30103	0	0	0.30103	0	0.30103	0.60206	0.477121	1.17609	0.954243	0.477121	0.30103	0.778151	0	0.30103	0	0	0
0	0	0	0	0	0	0	0	0.30103	0	0	0	0	0	0	0	0	0	0.60206	0	0	0	0	0.60206	0	0.477121	0.477121	0	0	0	0.477121	0	0.30103	0	0	0	0	0	0	0	0.30103	0	0.477121	0	0	0.30103	0.30103	0	0	0
0	0	0	0	0	0	0	0	1	0	0	0	0.30103	0	0	0	0	0	0	0.477121	0	0	0	0	0	0	0.30103	0	0	0	0	0	0	0	0	0.30103	0.30103	0.30103	0.30103	0.30103	0.30103	0.30103	0.30103	0	0.30103	0	0	0	0	0
0	0	0	0.30103	0	0	0	0	0.60206	0	0	0	0	0	0	0	0	0	0	0	0	0	0	0	0	0	0	0	0	0	0	0	0	0	0	0	0	0.30103	0	0	0	0	0	0	0.30103	0	0	0	0	0
0	0	0	0	0	0	0	0	0	0	0	0.477121	0	0	0	0	0	0	0.30103	0	0	0	0	0	0	0	0	0	0	0	0	0	0	0	0	0	0	0	0	0	0	0.30103	0.477121	0	0	0	0	0	0	0
0	0	0	0	0	0	0.69897	0.30103	0.90309	0.30103	0	1	0	0	0	0	0	0.477121	0	0.30103	0	0	0	0.30103	0	0	0.477121	0	0	0	0	0	0	0	0	0	0	0	0.30103	0.30103	0.69897	0.477121	0.60206	0.30103	0.60206	0	0.30103	0	0	0
0	0	0	0	0	0	0.30103	0.69897	1.14613	0.60206	0.30103	0.778151	0	0	0	0	0.30103	0	0.30103	0.60206	0	0.30103	0	0.60206	0	0	0.30103	0	0	0	0	0	0.60206	0.477121	0	0	0	0	1.07918	0	0.90309	0.30103	1.17609	1.17609	0.477121	0	0.477121	0	0	0
0	0	0	0	0.30103	0	0.30103	0.30103	1.17609	0	0	0.90309	0.60206	0	0	0	0	0.30103	0.954243	0.60206	0	0	0	0.30103	0	0.477121	0	0	0	0	0.30103	0	0.30103	0.30103	0	0	0	0.30103	0.30103	0	0.30103	0.30103	1	0.90309	0.60206	0	0.477121	0	0	0
0	0	0	0	0.30103	0	0.30103	0	0	0	0	0	0	0	0	0	0	0	0	0	0	0	0	0	0	0	0	0	0	0	0	0	0	0	0	0	0	0	0	0	0	0	0.477121	0.30103	0	0	0	0	0	0
0	0	0	0	0	0	0	0	0.30103	0	0	0	0.30103	0	0	0	0.30103	0	0.477121	0	0	0	0	0.30103	0	0	0	0	0	0	0	0	0	0	0	0	0	0	0.30103	0	0.477121	0.30103	0.30103	0.60206	0	0	0	0	0	0
0	0	0	0	0	0.477121	0	0	0.778151	0.30103	0.30103	0.30103	0.30103	0	0	0.30103	0	0	0	0	0.30103	0.30103	0	0.30103	0.30103	0	0.60206	0	0	0.30103	0.477121	0	0.30103	0	0	0	0	0	0	0	1.07918	0.30103	0.477121	0	0.778151	0	0.30103	0.30103	0	0
0	0	0	0	0.30103	0	0	0.477121	0	0	0	0	0	0	0.30103	0	0.30103	0	0	0	0	0.30103	0	0.30103	0	0	0	0	0	0	0	0	0	0	0	0.477121	0.30103	0.60206	0.477121	0	0.30103	0.30103	0	0.30103	0.778151	0	0.30103	0.30103	0	0
0	0	0	0	0.30103	0	0	0	0.30103	0	0	0	0.30103	0	0	0	0	0	0	0	0	0	0	0	0.30103	0	0	0	0	0	0	0	0	0	0	0	0	0	0	0	0	0	0	0	0.477121	0	0	0	0	0
0	0	0	0.30103	0	0	0	0.30103	0.477121	0.30103	0.30103	0.477121	0	0	0	0	0	0.30103	0.60206	0	0	0	0	0.30103	0	0	0	0	0	0	0.30103	0.60206	0	3.04415	0	0	0	0.30103	0.60206	0	0.778151	0.30103	0.778151	1.20412	0.477121	0.30103	0.477121	0	0	0
0	0	0	0.30103	0	0	0	0	0.778151	0	0.477121	0	0	0	0	0	0.477121	0.30103	0	0.60206	0	0	0	0.30103	0	0	0.30103	0	0.30103	0	0.30103	0	0	0	0.30103	0	0	0.30103	0	0	0.30103	0	0.60206	0.778151	0.954243	0	0	0.30103	0	0
0	0	0	0	0	0	0.30103	0	0.477121	0	0	0.778151	0.30103	0	0	0	0	0	0.477121	0	0	0	0	0	0	0.477121	0	0	0	0	0	0	0	0	0	0.30103	0	0	0	0	0.778151	0	0.30103	0.30103	0.30103	0	0	0	0	0
0	0	0	0.477121	0	0	0.30103	0.477121	0.954243	0	0.954243	0.60206	0.69897	0	0.30103	0	0	0.30103	0.60206	0.778151	0	0	0	0.30103	2.48287	0	0.477121	0	0	0	0	0	0	0.30103	0.954243	0.30103	0	0.30103	0.60206	0	0	0.477121	0	0.69897	0	0	0	0	0	0
2.10721	0	0	0	0	0	0	0	0	0.30103	0	0	0	0	0.30103	0	0	0	0	0	2.62325	0	2.48572	0	2.50515	0	0	0	0	0	0	0	0	0	0	0	0	0	0	0	0	0	0	0	0	0	0	0	0	1.5563
0	0	0	0	0	0	0	0	0	0	0	0	0	0	0	0	0	0	0	0	0	0	0	0	0	0	0	0	0	0	0	0	0	0	0	0	0	0	0	0	0	0	0	0	0	0	0	0	0	0
0	0	0	0	0	0	0	0	0	0	0	0	0	0	0	0	0	0	0	0	0	0	0	0	0	0	0	0	0	0	0	0	0	0	0	0	0	0	0	0	0	0	0	0	0	0	0	0	0	0
0	0	0	0	0	0	0	0	0	0	0	0	0	0	0	0	0	0	0	0	0	0	0	0	0	0	0	0	0	0	0	0	0	0	0	0	0	0	0	0	0	0	0	0	0	0	0	0	0	0
0	0	0	0	0	0	0	0	0	0	0	0	0	0	0.477121	0	0	0	0	0	0	0	0	0	0	0.30103	0	0	0	0	0	0	0	0	0	0	0	0	0	0	0	0	0	0	0	0	0	0	0	0
[truncated: 277 more columns]

## Sheet: 5B_zoom
V1	V2	V3	V4	V5	V6	V7	V8	V9	V10	V11	V12	V13	V14	V15	V16	V17	V18	V19	V20	V21	V22	V23	V24	V25	V26	V27	V28	V29	V30	V31	V32	V33	V34	V35	V36	V37	V38	V39	V40	V41	V42	V43	V44	V45	V46	V47	V48	V49	V50
2.15836	0	0	0	0	0	0	0	0	0	0	0	0	0.30103	0	0	0	0	0	0	0	2.87157	0	0	0	0	0	0	0	0	0	0	0	0	0	0	0	0	0	0	0	0	0	0	0	0	0	0	0	0
0	7.05474	6.62299	4.41363	3.88773	4.44784	0	0	0	0	0	0	0	0	0	0	0	0	0.477121	0	0	0	0	0	0	0	0	0	0	0	0	0	0	0	0	0	0	0	0	0	0	0	0	0	0	0	0	0	0	0
0	6.62299	7.01057	4.973	3.91169	4.20197	0	0	0	0	0	0	0	0	0	0	0	0	0	0	0	0	0	0	0	0	0	0	0	0	0	0	0	0	0	0	0	0	0	0	0	0	0	0	0	0	0	0	0	0
0	4.41363	4.973	6.69817	6.80391	2.81023	0	0	0	0	0.30103	0	0	0	0	0	0	0	0	0	0	0	0	0	0	0	0	0	0	0	0	0	0	0	0	0	0	0	0	0	0	0	0	0	0	0	0	0	0	0
0	3.88773	3.91169	6.80391	6.94023	3.30621	0	0	0	0	0	0	0	0	0	0	0	0	0	0	0	0	0	0	0	0	0	0	0	0	0	0	0	0	0	0	0	0	0	0	0	0	0	0	0	0	0	0	0	0
0	4.44784	4.20197	2.81023	3.30621	6.61456	3.72181	0.778151	0	0	0	0	0	0	0	0	0	0	0	0	0	0	0	0	0	0	0	0	0	0	0	0	0	0	0	0	0	0	0	0	0	0	0	0	0	0	0	0	0	0
0	0	0	0	0	3.72181	5.13875	1.07918	0	0	0	0	0	0	0	0	0	0	0	0	0	0	0	0	0	0	0	0	0	0	0	0	0	0	0	0	0	0	0	0	0	0	0	0	0	0	0	0	0	0
0	0	0	0	0	0.778151	1.07918	3.49638	0	0	0	0	0.477121	0	0	0	0	0	0	0.477121	0	0.477121	0	0	0	0	0	0	0	0	0	0	0	0	0	0	0	0	0	0	0	0	0	0	0	0	0	0	0	0
0	0	0	0	0	0	0	0	5.76846	5.67233	5.72793	5.6112	5.57538	5.40564	5.7892	5.69489	5.63036	5.65635	5.58818	4.91709	5.08721	0	0	0	0	0	0	0	0	0	0	0	0	0	0	0	0	0	0	0	0	0	0	0	0	0	0	0	0	0
0	0	0	0	0	0	0	0	5.67233	7.08416	7.00374	6.85297	6.88015	6.66525	7.20065	7.03565	7.02402	7.19176	7.12459	6.30954	6.38493	0	0	0	0	0	0	0	0	0	0	0	0	0	0	0	0	0	0	0	0	0	0	0	0	0	0	0	0	0
0	0	0	0.30103	0	0	0	0	5.72793	7.00374	7.18057	7.08916	6.99937	6.7122	7.2615	7.16992	7.10118	7.15497	7.03223	6.1214	6.3279	0	0	0	0	0	0	0	0	0	0	0	0	0	0	0	0	0	0	0	0	0	0	0	0	0	0	0	0	0
0	0	0	0	0	0	0	0	5.6112	6.85297	7.08916	6.87137	6.93391	6.6746	7.06421	7.04375	6.92379	6.95056	6.81175	5.92159	6.13084	0	0	0	0	0	0	0	0	0	0	0	0	0	0	0	0	0	0	0	0	0	0	0	0	0	0	0	0	0
0	0	0	0	0	0	0	0.477121	5.57538	6.88015	6.99937	6.93391	6.99745	6.85321	7.13591	7.02861	6.95406	7.08037	6.90455	6.0217	6.18732	0	0	0	0	0	0	0	0	0	0	0	0	0	0	0	0	0	0	0	0	0	0	0	0	0	0	0	0	0
0.30103	0	0	0	0	0	0	0	5.40564	6.66525	6.7122	6.6746	6.85321	6.91939	6.88224	6.77183	6.73761	6.83003	6.65195	5.81623	5.99841	0	0	0	0	0	0	0	0	0	0	0	0	0	0	0	0	0	0	0	0	0	0	0	0	0	0	0	0	0
0	0	0	0	0	0	0	0	5.7892	7.20065	7.2615	7.06421	7.13591	6.88224	7.58939	7.25115	7.24605	7.37307	7.29942	6.27594	6.47117	0	0	0	0	0	0	0	0	0	0	0	0	0	0	0	0	0	0	0	0	0	0	0	0	0	0	0	0	0
0	0	0	0	0	0	0	0	5.69489	7.03565	7.16992	7.04375	7.02861	6.77183	7.25115	7.38199	7.30939	7.2691	7.13753	6.18349	6.42783	0	0	0	0	0	0	0	0	0	0	0	0	0	0	0	0	0	0	0	0	0	0	0	0	0	0	0	0	0
0	0	0	0	0	0	0	0	5.63036	7.02402	7.10118	6.92379	6.95406	6.73761	7.24605	7.30939	7.31983	7.27114	7.09612	6.15669	6.35435	0	0	0	0	0	0	0	0	0	0	0	0	0	0	0	0	0	0	0	0	0	0	0	0	0	0	0	0	0
0	0	0	0	0	0	0	0	5.65635	7.19176	7.15497	6.95056	7.08037	6.83003	7.37307	7.2691	7.27114	7.47407	7.39586	6.25163	6.47271	0	0	0	0	0	0	0	0	0	0	0	0	0	0	0	0	0	0	0	0	0	0	0	0	0	0	0	0	0
0	0.477121	0	0	0	0	0	0	5.58818	7.12459	7.03223	6.81175	6.90455	6.65195	7.29942	7.13753	7.09612	7.39586	7.26451	6.3082	6.46843	0	0	0	0	0	0	0	0	0	0	0	0	0	0	0	0	0	0	0	0	0	0	0	0	0	0	0	0	0
0	0	0	0	0	0	0	0.477121	4.91709	6.30954	6.1214	5.92159	6.0217	5.81623	6.27594	6.18349	6.15669	6.25163	6.3082	6.25291	6.61366	0	0	0	0	0	0	0	0	0	0	0	0	0	0	0	0	0	0	0	0	0	0	0	0	0	0	0	0	0
0	0	0	0	0	0	0	0	5.08721	6.38493	6.3279	6.13084	6.18732	5.99841	6.47117	6.42783	6.35435	6.47271	6.46843	6.61366	6.86658	0	0	0	0	0	0	0	0	0	0	0	0	0	0	0	0	0	0	0	0	0	0	0	0	0	0	0	0	0
2.87157	0	0	0	0	0	0	0.477121	0	0	0	0	0	0	0	0	0	0	0	0	0	4.17272	0	0.60206	0	0	0	0	0	0	0	0	0	0	0	0	0	0	0	0	0	0	0	0	0	0	0	0	0	0
0	0	0	0	0	0	0	0	0	0	0	0	0	0	0	0	0	0	0	0	0	0	6.77656	4.47465	0	0	0	0	0	0	0	0	0	0	0	0	0	0	0	0	0	0	0	0	0	0	0	0	0	0
0	0	0	0	0	0	0	0	0	0	0	0	0	0	0	0	0	0	0	0	0	0.60206	4.47465	5.72426	0	0	0	0	0	0	0	0	0	0	0	0	0	0	0	0	0	0	0	0	1.85733	0	0	0	0	0
0	0	0	0	0	0	0	0	0	0	0	0	0	0	0	0	0	0	0	0	0	0	0	0	6.79762	5.47551	0	0	4.07624	0	0	0	0	0	0	0	0	0	0	0	0	0	0	0	0	0	0	0	0	0
0	0	0	0	0	0	0	0	0	0	0	0	0	0	0	0	0	0	0	0	0	0	0	0	5.47551	7.85299	5.66424	5.35512	6.3547	0	0	0	0	0	0	0	0	0	0	0	0	0	0	0	0	0	0	0	0	0
0	0	0	0	0	0	0	0	0	0	0	0	0	0	0	0	0	0	0	0	0	0	0	0	0	5.66424	7.41121	6.85226	4.24055	0	0	0	0	0	0	0	0	0	0	0	0	0	0	0	0	0	0	0	0	0
0	0	0	0	0	0	0	0	0	0	0	0	0	0	0	0	0	0	0	0	0	0	0	0	0	5.35512	6.85226	6.7506	4.3194	0	0	0	0	0	0	0	0	0	0	0	0	0	0	0	0	0	0	0	0	0
0	0	0	0	0	0	0	0	0	0	0	0	0	0	0	0	0	0	0	0	0	0	0	0	4.07624	6.3547	4.24055	4.3194	5.73021	0	0	0	0	0	0	0	0	0	0	0	0	0	0	0	0	0	0	0	0	0
0	0	0	0	0	0	0	0	0	0	0	0	0	0	0	0	0	0	0	0	0	0	0	0	0	0	0	0	0	7.1234	5.73213	7.55339	7.28653	7.21197	0	0	0	0	0	0	0	0	0	0	0	0	0	0	0	0
0	0	0	0	0	0	0	0	0	0	0	0	0	0	0	0	0	0	0	0	0	0	0	0	0	0	0	0	0	5.73213	6.6681	4.92663	0	3.47188	0	0	0	0	0	0	0	0	0	0	0	0	0	0	0	0
0	0	0	0	0	0	0	0	0	0	0	0	0	0	0	0	0	0	0	0	0	0	0	0	0	0	0	0	0	7.55339	4.92663	8.68255	8.47764	8.07052	0	0	0	0	0	0	0	0	0	0	0	0	0	0	0	0
0	0	0	0	0	0	0	0	0	0	0	0	0	0	0	0	0	0	0	0	0	0	0	0	0	0	0	0	0	7.28653	0	8.47764	8.44652	7.9583	0	0	0	0	0	0	0	0	0	0	0	0	0	0	0	0
0	0	0	0	0	0	0	0	0	0	0	0	0	0	0	0	0	0	0	0	0	0	0	0	0	0	0	0	0	7.21197	3.47188	8.07052	7.9583	7.85402	0	0	0	0	0	0	0	0	0	0	0	0	0	0	0	0
0	0	0	0	0	0	0	0	0	0	0	0	0	0	0	0	0	0	0	0	0	0	0	0	0	0	0	0	0	0	0	0	0	0	7.51494	7.37952	6.33181	0	0	0	0	0	0	0	0	0	0	0	0	0
0	0	0	0	0	0	0	0	0	0	0	0	0	0	0	0	0	0	0	0	0	0	0	0	0	0	0	0	0	0	0	0	0	0	7.37952	7.74022	6.48534	0	0	0	0	0	0	0	0	0	0	0	0	0
0	0	0	0	0	0	0	0	0	0	0	0	0	0	0	0	0	0	0	0	0	0	0	0	0	0	0	0	0	0	0	0	0	0	6.33181	6.48534	6.29597	0	0	0	0	0	0	0	0	0	0	0	0	0
0	0	0	0	0	0	0	0	0	0	0	0	0	0	0	0	0	0	0	0	0	0	0	0	0	0	0	0	0	0	0	0	0	0	0	0	0	6.05388	0	0	0	0	0	0	0	0	0	0	0.30103	0
0	0	0	0	0	0	0	0	0	0	0	0	0	0	0	0	0	0	0	0	0	0	0	0	0	0	0	0	0	0	0	0	0	0	0	0	0	0	9.04267	9.09555	0	0	0	0	0	0	0	0	0	0
0	0	0	0	0	0	0	0	0	0	0	0	0	0	0	0	0	0	0	0	0	0	0	0	0	0	0	0	0	0	0	0	0	0	0	0	0	0	9.09555	9.57322	0	0	0	0	0	0	0	0	0	0
0	0	0	0	0	0	0	0	0	0	0	0	0	0	0	0	0	0	0	0	0	0	0	0	0	0	0	0	0	0	0	0	0	0	0	0	0	0	0	0	6.9858	7.69898	7.54048	0	0	0	0	0	0	0
0	0	0	0	0	0	0	0	0	0	0	0	0	0	0	0	0	0	0	0	0	0	0	0	0	0	0	0	0	0	0	0	0	0	0	0	0	0	0	0	7.69898	8.79107	8.85758	0	0	0	0	0	0	0
0	0	0	0	0	0	0	0	0	0	0	0	0	0	0	0	0	0	0	0	0	0	0	0	0	0	0	0	0	0	0	0	0	0	0	0	0	0	0	0	7.54048	8.85758	9.15395	0	0	0	0	0	0	0
0	0	0	0	0	0	0	0	0	0	0	0	0	0	0	0	0	0	0	0	0	0	0	0	0	0	0	0	0	0	0	0	0	0	0	0	0	0	0	0	0	0	0	8.39984	0	0	0	0	0	0
0	0	0	0	0	0	0	0	0	0	0	0	0	0	0	0	0	0	0	0	0	0	0	1.85733	0	0	0	0	0	0	0	0	0	0	0	0	0	0	0	0	0	0	0	0	0	0	0	0	0	0
0	0	0	0	0	0	0	0	0	0	0	0	0	0	0	0	0	0	0	0	0	0	0	0	0	0	0	0	0	0	0	0	0	0	0	0	0	0	0	0	0	0	0	0	0	0	0	0	2.57749	0
0	0	0	0	0	0	0	0	0	0	0	0	0	0	0	0	0	0	0	0	0	0	0	0	0	0	0	0	0	0	0	0	0	0	0	0	0	0	0	0	0	0	0	0	0	0	8.05388	7.69756	0	0
0	0	0	0	0	0	0	0	0	0	0	0	0	0	0	0	0	0	0	0	0	0	0	0	0	0	0	0	0	0	0	0	0	0	0	0	0	0	0	0	0	0	0	0	0	0	7.69756	7.89261	0	0
0	0	0	0	0	0	0	0	0	0	0	0	0	0	0	0	0	0	0	0	0	0	0	0	0	0	0	0	0	0	0	0	0	0	0	0	0	0.30103	0	0	0	0	0	0	0	2.57749	0	0	3.96454	4.22528
0	0	0	0	0	0	0	0	0	0	0	0	0	0	0	0	0	0	0	0	0	0	0	0	0	0	0	0	0	0	0	0	0	0	0	0	0	0	0	0	0	0	0	0	0	0	0	0	4.22528	4.78187
0	0	0	0	0	0	0	0	0	0	0	0	0	0	0	0	0	0	0	0	0	0	0	0	0	0	0	0	0	0	0	0	0	0	0	0	0	0	0	0	0	0	0	0	0	0	0	0	0	4.7676
0	0	0	0	0	0	0	0	0	0	0	0	0	0	0	0	0	0	0	0	0	0	0	0	0	0	0	0	0	0	0	0	0	0	0	0	0	0	0	0	0	0	0	0	0	0	0	0	0	3.82737
0	0	0	0	0	0	0	0	0	0	0	0	0	0	0	0	0	0	0	0	0	0	0	0	0	0	0	0	0	0	0	0	0	0	0	0	0	0	0	0	0	0	0	0	0	0	0	0	0	0
0	0	0	0	0	0	0	0	0	0	0	0	0	0	0	0	0	0	0	0	0	0	0	0	0	0	0	0	0	0	0	0	0	0	0	0	0	0	0	0	0	0	0	0	0	0	0	0	0	0
0	0	0	0	0	0	0	0	0	0	0	0	0	0	0	0	0	0	0	0	0	0	0	0	0	0	0	0	0	0	0	0	0	0	0	0	0	0	0	0	0	0	0	0	0	0	0	0	0	0
0	0	0	0	0	0	0	0	0	0	0	0	0	0	0	0	0	0	0	0	0	0	0	0	0	0	0	0	0	0	0	0	0	0	0	0	0	0	0	0	0	0	0	0	0	0	0	0	0	0
0	0	0	0	0	0	0	0	0	0	0	0	0	0	0	0	0	0	0	0	0	0	0	0	0	0	0	0	0	0	0	0	0	0	0	0	0	0	0	0	0	0	0	0	0	0	0	0	0	0
0	0	0	0	0	0	0	0	0	0	0	0	0	0	0	0	0	0	0	0	0	0	0	0	0	0	0	0	0	0	0	0	0	0	0	0	0	0	0	0	0	0	0	0	0	0	0	0	0	0.30103
0	0	0	0	0	0	0	0	0	0	0	0	0	0	0	0	0	0	0	0	0	0	0	0	0	0	0	0	0	0	0	0	0	0	0	0	0	0	0	0	0	0	0	0	0	0	0	0	0	0
0	0	0	0	0	0	0	0	0	0	0	0	0	0	0	0	0	0	0	0	0	0	0	0	0	0	0	0	0	0	0	0	0	0	0	0	0	0	0	0	0	0	0	0	0	0	0	0	0	0
0	0	0	0	0	0	0	0	0	0	0	0	0	0	0	0	0	0	0	0	0	0	0	0	0	0	0	0	0	0	0	0	0	0	0	0	0	0	0	0	0	0	0	0	0	0	0	0	0	0.30103
0	0	0	0	0	0	0	0	0	0	0	0	0	0	0	0	0	0	0	0	0	0	0	0	0	0	0	0	0	0	0	0	0	0	0	0	0	0	0	0	0	0	0	0	0	0	0	0	0	0.30103
0	0	0	0	0	0	0	0	0	0	0	0	0	0	0	0	0	0	0	0	0	0	0	0	0	0	0	0	0	0	0	0	0	0	0	0	0	0	0	0	0	0	0	0	0	0	0	0	0	0
0	0	0	0	0	0	0	0	0	0	0	0	0	0	0	0	0	0	0	0	0	0	0	0	0	0	0	0	0	0	0	0	0	0	0	0	0	0	0	0	0	0	0	0	0	0	0	0	0	0
0	0	0	0	0	0	0	0	0	0	0	0	0	0	0	0	0	0	0	0	0	0	0	0	0	0	0	0	0	0	0	0	0	0	0	0	0	0	0	0	0	0	0	0	0	0	0	0	0	0
0	0	0	0	0	0	0	0	0	0	0	0	0	0	0	0	0	0	0	0	0	0	0	0	0	0	0	0	0	0	0	0	0	0	0	0	0	0	0	0	0	0	0	0	0	0	0	0	0	0
0	0	0	0	0	0	0	0	0	0	0	0	0	0	0	0	0	0	0	0	0	0	0	0	0	0	0	0	0	0	0	0	0	0	0	0	0	0	0	0	0	0	0	0	0	0	0	0	0	0
0	0	0	0	0	0	0	0	0	0	0	0	0	0	0	0	0	0	0	0	0	0	0	0	0	0	0	0	0	0	0	0	0	0	0	0	0	0	0	0	0	0	0	0	0	0	0	0	0	0
0	0	0	0	0	0	0	0	0	0	0	0	0	0	0	0	0	0	0	0	0	0	0	0	0	0	0	0	0	0	0	0	0	0	0	0	0	0	0	0	0	0	0	0	0	0	0	0	0	0.30103
0	0	0	0	0	0	0	0	0	0	0	0	0	0	0	0	0	0	0	0	0	0	0	0	0	0	0	0	0	0	0	0	0	0	0	0	0	0	0	0	0	0	0	0	0	0	0	0	0	0
0	0	0	0	0	0	0	0	0	0	0	0	0	0	0	0	0	0	0	0	0	0	0	0	0	0	0	0	0	0	0	0	0	0	0	0	0	0	0	0	0	0	0	0	0	0	0	0	0	0
0	0	0	0	0	0	0	0	0	0	0	0	0	0	0	0	0	0	0	0	0	0	0	0	0	0	0	0	0	0	0	0	0	0	0	0	0	0	0	0	0	0	0	0	0	0	0	0	0	0.60206
0	0	0	0	0	0	0	0	0	0	0	0	0	0	0	0	0	0	0	0	0	0	0	0	0	0	0	0	0	0	0	0	0	0	0	0	0	0	0	0	0	0	0	0	0	0	0	0	0	0
0	0	0	0	0	0	0	0	0	0	0	0	0	0	0	0	0	0	0	0	0	0	0	0	0	0	0	0	0	0	0	0	0	0	0	0	0	0	0	0	0	0	0	0	0	0	0	0	0	0.30103
0	0	0	0	0	0	0	0	0	0	0	0	0	0	0	0	0	0	0	0	0	0	0	0	0	0	0	0	0	0	0	0	0	0	0	0	0	0	0	0	0	0	0	0	0	0	0	0	0	0
0	0	0	0	0	0	0	0	0	0	0	0	0	0	0	0	0	0	0	0	0	0	0	0	0	0	0	0	0	0	0	0	0	0	0	0	0	0	0	0	0	0	0	0	0	0	0	0	0	0
0	0	0	0	0	0	0	0	0	0	0	0	0	0	0	0	0	0	0	0	0	0	0	0	0	0	0	0	1.44716	0	0	0	0	0	0	0	0	0	0	0	0	0	0	0	0	0	0	0	0	0
0	0	0	0	0	0	0	0	0	0	0	0	0	0	0	0	0	0	0	0	0	0	0	1.20412	0	0	0	0	0	0	0	0	0	0	0	0	0	0	0	0	0	0	0	0	0	2.53403	0	0	0	0
0	0	0	0	0	0	0	0	0	0	0	0	0	0	0	0	0	0	0	0	0	0	0	0	0	0	0	0	0	0	0	0	0	0	0	0	0	0	0	0	0	0	0	0	3.03543	1.68124	0	0	2.21748	0
0	0	0	0	0	0	0	0	0	0	0	0	0	0	0	0	0	0	0	0	0	0	0	1.47712	0	0	0	0	0	0	0	0	0	0	0	0	0	0	0	0	0	0	0	0	3.75587	0	0	0	2.43457	0
0	0	0	0	0	0	0	0	0	0	0	0	0	0	0	0	0	0	0	0	0	0	0	0	0	0	0	0	0	0	0	0	0	0	0	0	0	0	0	0	0	0	0	0	0	0	0	0	0	0
0	0	0	0	0	0	0	0	0	0	0	0	0	0	0	0	0	0	0	0	0	0	0	0	0	0	0	0	0	0	0	0	0	0	0	0	0	0	0	0	0	0	0	0	0	0	0	0	0	0
0	0	0	0	0	0	0	0	0	0	0	0	0	0	0	0	0	0	0	0	0	0	0	0	0	0	0	0	0	0	0	0	0	0	0	0	0	0	0	0	0	0	0	0	0	0	0	0	0	0
0	0	0	0	0	0	0	0	0	0	0	0	0	0	0	0	0	0	0	0	0	0	0	0	0	0	0	0	0	0	0	0	0	0	0	0	0	0	0	0	0	0	0	0	0	0	0	0	0	0
0	0	0	0	0	0	0	0	0	0	0	0	0	0	0	0	0	0	0	0	0	0	0	0	0	0	0	0	0	0	0	0	0	0	0	0	0	0	0	0	0	0	0	0	0	0	0	0	0	0
0	0	0	0	0	0	0	0	0	0	0	0	0	0	0	0	0	0	0	0	0	0	0	0	0	0	0	0	0	0	0	0	0	0	0	0	0	0	0	0	0	0	0	0	0	0	0	0	0	0
0	0	0	0	0	0	0	0	0	0	0	0	0	0	0	0	0	0	0	0	0	0	0	0	0	0	0	0	0	0	0	0	0	0	0	0	0	0	0	0	0	0	0	0	0	0	0	0	0	0
0	0	0	0	0	0	0	0	0	0	0	0	0	0	0	0	0	0	0	0	0	0	0	0	0	0	0	0	0	0	0	0	0	0	0	0	0	0	0	0	0	0	0	0	0	0	0	0	0	0
0	0	0	0	0	0	0	0	0	0	0	0	0	0	0	0	0	0	0	0	0	0	0	0	0	3.08243	4.47603	3.95617	1.54407	0	0	0	0	0	0	0	0	0	0	0	0	0	0	0	0	0	0	0	0	0
0	0	0	0	0	0	0	0	0	0	0	0	0	0	0	0	0	0	0	0	0	0	0	0	0	0	0	0.477121	1.07918	0	0	0	0	0	0	0	0	0	0	0	0	0	0	0	0	0	0	0	0	0
0	0	0	0	0	0	0	0	0	0	0	0	0	0	0	0	0	0	0	0	0	0	0	0	0	0	0	0.30103	0	0	0	0	0	0	0	0	0	0	0	0	0	0	0	0	0	0	0	0	0	0
0	0	0	0	0	0	0	0	0	0	0	0	0	0	0	0	0	0	0	0	0	0	0	0	0	0	0	0.60206	0	0	0	0	0	0	0	0	0	0	0	0	0	0	0	0	0	0	0	0	0	0
0	0	0	0	0	0	0	0	0	0	0	0	0	0	0	0	0	0	0	0	0	0	0	0	0	0.778151	0	0.778151	1.73239	0	0	0	0	0	0	0	0	0	0	0	0	0	0	0	0	0	0	0	0	0
0	0	0	0	0	0	0	0	0	0	0	0	0	0	0	0	0	0	0	0	0	0	0	0	0	0	0	0	3.86847	0	0	0	0	0	0	0	0	0	0	0	0	0	0	0	0	0	0	0	0	0
0	0	0	0	0	0	0	0	0	0	0	0	0	0	0	0	0	0	0	0	0	0	0	0	0	0	0	0	0	0	0	0	0	0	0	0	0	0	0	0	0	0	0	0	0	0	0	0	0	0
0	0	0	0	0	0	0	0	0	0	0	0	0	0	0	0	0	0	0	0	0	0	0	0	0	0	0	0	0	0	0	0	0	0	0	0	0	0	0	0	0	0	0	0	0	0	0	0	0	0
0	0	0	0	0	0	0	0	0	0	0	0	0	0	0	0	0	0	0	0	0	0	0	0	0	0	0	0	0	0	0	0	0	0	0	0	0	0	0	0	0	0	0	0	0	0	0	0	0	0
0	0	0	0	0	0	0.30103	0	0	0	0	0	0	0	0	0	0	0	0	0	0	0	0	0	0	0	0	0	0	0	0	0	0	0	0	0	0	0	0	0	0	0	0	0	0	0	0	0	0	0
0	0	0	0	0	0	1.54407	0	0	0	0	0	0	0	0	0	0	0	0	0	0	0.30103	0	0	0	0	0	0	0.778151	0	0	0	0	0	0	0	0	0	0	0	0	0	0	0	0	0	0	0	0	0
0	0	0	0	0	0	0	0	0	0	0	0	0	0	0	0	0	0	0	0	0	0	0	0	0	0	0	0	0	0	0	0	0	0	0	0	0	0	0	0	0	0	0	0	0	0	0	0	0	0
0	0	0	0	0	0	0	0	0	0	0	0	0	0	0	0	0	0	0	0	0	0	0	0	0	0	0	0	0	0	0	0	0	0	0	0	0	0	0	0	0	0	0	0	2.43136	0	0	0	0	0
0	0	0	0	0	0	0	0	0	0	0	0	0	0	0	0	0	0	0	0	0	1.30103	0	0	0	0	0	0	0	0	0	0	0	0	0	0	0	0	0	0	0	0	0	0	0	0	0	0	0	0
0	0	0	0	0	0	0	0	0	0	0	0	0	0	0	0	0	0	0	0	0	0	0	0	0	0	0	0	0	0	0	0	0	0	0	0	0	0	0	0	0	0	0	0	0	0	0	0	0	0
0	0	0	0	0	0	0	0	0	0	0	0	0	0	0	0	0	0	0	0	0	0	0	0	0	0	0	0	0	0	0	0	0	0	0	0	0	0	0	0	0	0	0	0	0	0	0	0	0	0
0	0	0	0	0	0	0	0	0	0	0	0	0	0	0	0	0	0	0	0	0	0	0	0	0	0	0	0	0	0	0	0	0	0	0	0	0	0	0	0	0	0	0	0	0	0	0	0	0	0
0	0	0	0	0	0	0.90309	0	0	0	0	0	0	0	0	0	0	0	0	0	0	0	0	0	0	0	0	0	0	0	0	0	0	0	0	0	0	0	0	0	0	0	0	0	0	0	0	0	0	0
0	0	0	0	0	0	0	0	0	0	0	0	0	0	0	0	0	0	0	0	0	0	0	0	0	0	0	0	3.848	0	0	0	0	0	0	0	0	0	0	0	0	0	0	0	0	0	0	0	0	0
0	0	0	0	0	0	0	0	0	0	0	0	0	0	0	0	0	0	0	0	0	0	0	0	0	0	0	0	0	0	0	0	0	0	0	0	0	0	0	0	0	0	0	0	0	0	0	0	0	0
0	0	0	0	0	0	0.778151	0	0	0	0	0	0	0	0	0	0	0	0	0	0	0.477121	0	0	0	0	0	0	0	0	0	0	0	0	0	0	0	0	0	0	0	0	0	0	0	0	0	0	0	0
0	0	0	0	0	0	1.65321	0.30103	0	0	0	0	0	0	0	0	0	0	0	0	0	0	0	0	0	0	0	0	0.477121	0	0	0	0	0	0	0	0	0	0	0	0	0	0	0	0	0	0	0	0	0
0	0	0	0	0	0	0.778151	3.61888	0	0	0	0	0	0	0	0	0	0	0	0	0	0	0	0	0	0	0	0	2.46835	0	0	0	0	0	0	0	0	0	0	0	0	0	0	0	0	0	0	0	0	0
0	0	0	0	0	0	0	0	0	0	0	0	0	0	0	0	0	0	0	0	0	0	0	0	0	0	0	0	0	0	0	0	0	0	0	0	0	0	0	0	0	0	0	0	1.5563	1.98227	0	0	2.36922	0
0	0	0	0	0	0	0	0	0	0	0	0	0	0	0	0	0	0	0	0	0	0	0	0	0	0	0	0	0	0	0	0	0	0	0	0	0	0	0	0	0	0	0	0	0	0	0	0	0	0
0	0	0	0	0	0	0	0	0	0	0	0	0	0	0	0	0	0	0	0	0	0	0	0.954243	0	0	0	0	0	0	0	0	0	0	0	0	0	0	0	0	0	0	0	0	0	0	0	0	0	0
0	0	0	0	0	0	0	0	0	0	0	0	0	0	0	0	0	0	0	0	0	0	0	0	0	0	0	0	0	0	0	0	0	0	0	0	0	0	0	0	0	0	0	0	0	0	0	0	0	0
0	0	0	0	0	0	0	0	0	0	0	0	0	0	0	0	0	0	0	0	0	0	0	0	0	0	0	0	0	0	0	0	0	0	0	0	0	0	0	0	0	0	0	0	0	0	0	0	0	0
0	0	0	0	0	0	0	0	0	0	0	0	0	0	0	0	0	0	0	0	0	0	0	0	0	0	0	0	0	0	0	0	0	0	0	0	0	0	0	0	0	0	0	0	0	0	0	0	0	0
0	0	0	0	0	0	1.25527	0	0	0	0	0	0	0	0	0	0	0	0	0	0	0	0	0	0	0	0	0	0	0	0	0	0	0	0	0	0	0	0	0	0	0	0	0	0	0	0	0	0	0
0	0	0	0	0	0	0	0	0	0	0	0	0	0	0	0	0	0	0	0	0	0	0	0	0	0.30103	0	0.60206	4.52634	0	0	0	0	0	0	0	0	0	0	0	0	0	0	0	0	0	0	0	0	0
0	0	0	0	0	0	0	0	0	0	0	0	0	0	0	0	0	0	0	0	0	0	0	0	0	0	0	0	3.57019	0	0	0	0	0	0	0	0	0	0	0	0	0	0	0	0	0	0	0	0	0
0	0	0	0	0	0	0	0	0	0	0	0	0	0	0	0	0	0	0	0	0	0	0	0	0	0	0	0	0	0	0	0	0	0	0	0	0	0	0	0	0	0	0	0	0	0	0	0	0	0
0	0	0	0	0	0	0	0	0	0	0	0	0	0	0	0	0	0	0	0	0	0	0	0	0	0	0	0	0	0	0	0	0	0	0	0	0	0	0	0	0	0	0	0	0	0	0	0	0	0
0	0	0	0	0	0	0	0	0	0	0	0	0	0	0	0	0	0	0	0	0	0.69897	0	0	0	0	0	0	0	0	0	0	0	0	0	0	0	0	0	0	0	0	0	0	0	0	0	0	0	0
0	0	0	0	0	0	0	0	0	0	0	0	0	0	0	0	0	0	0	0	0	0	0	0	0	0	0	0	0	0	0	0	0	0	0	0	0	0	0	0	0	0	0	0	0	0	0	0	0	0
0	0	0	0	0	0	0	0	0	0	0	0	0	0	0	0	0	0	0	0	0	0	0	0	0	0	0	0	0	0	0	0	0	0	0	0	0	0	0	0	0	0	0	0	0	0	0	0	0	0
0	0	0	0	0	0	0	0	0	0	0	0	0	0	0	0	0	0	0	0	0	0	0	0	0	0	0	0	0	0	0	0	0	0	0	0	0	0	0	0	0	0	0	0	0	0	0	0	0	0
0	0	0	0	0	0	0	0	0	0	0	0	0	0	0	0	0	0	0	0	0	0	0	0	0	0	0	0	0	0	0	0	0	0	0	0	0	0	0	0	0	0	0	0	0	0	0	0	0	0
0	0	0	0	0	0	0	0	0	0	0	0	0	0	0	0	0	0	0	0	0	0	0	0	0	0	0	0	0	0	0	0	0	0	0	0	0	0	0	0	0	0	0	0	0	0	0	0	0	0
0	0	0	0	0	0	0	0	0	0	0	0	0	0	0	0	0	0	0	0	0	0	0	0	0	0	0	0	0	0	0	0	0	0	0	0	0	0	0	0	0	0	0	0	0	0	0	0	0	0
0	0	0	0	0	0	0	0	0	0	0	0	0	0	0	0	0	0	0	0	0	0	0	0	0	0	0	0	0	0	0	0	0	0	0	0	0	0	0	0	0	0	0	0	0	0	0	0	0	0
0	0	0	0	0	0	0	0	0	0	0	0	0	0	0	0	0	0	0	0	0	0	0	0	0	0	0	0	0	0	0	0	0	0	0	0	0	0	0	0	0	0	0	0	0	0	0	0	0	0
0	0	0	0	0	0	0	0	0	0	0	0	0	0	0	0	0	0	0	0	0	0	0	0	0	0	0	0	0	0	0	0	0	0	0	0	0	0	0	0	0	0	0	0	0	0	0	0	0	0
0	0	0	0	0	0	0	0	0	0	0	0	0	0	0	0	0	0	0	0	0	0	0	0	0	0	0	0	0	0	0	0	0	0	0	0	0	0	0	0	0	0	0	0	0	0	0	0	0	0
0	0	0	0	0	0	0	0	0	0	0	0	0	0	0	0	0	0	0	0	0	0	0	0	0	0	0	0	0	0	0	0	0	0	0	0	0	0	0	0	0	0	0	0	0	0	0	0	0	0
0	0	0	0	0	0.60206	0	0	0	0	0	0	0	0	0	0	0	0	0	0	0	1.07918	0	0	0	0	0	0	0	0	0	0	0	0	0	0	0	0	0	0	0	0	0	0	0	0	0	0	0	0
0	0	0	0	0	0	0	0	0	0	0	0	0	0	0	0	0	0	0	0	0	0	0	0	0	0	0	0	0	0	0	0	0	0	0	0	0	0	0	0	0	0	0	0	0	0	0	0	0	0
0	0	0	0	0	0	0	0	0	0	0	0	0	0	0	0	0	0	0	0	0	0	0	0	0	0	0	0	0	0	0	0	0	0	0	0	0	0	0	0	0	0	0	0	0	0	0	0	0	0
0	0	0	0	0	0	0	0	0	0	0	0	0	0	0	0	0	0	0	0	0	0	0	0	0	0	0	0	0	0	0	0	0	0	0	0	0	0	0	0	0	0	0	0	0	0	0	0	0	0
0	0	0	0	0	0	0	0	0	0	0	0	0	0	0	0	0	0	0	0	0	0	0	0	0	0	0	0	0	0	0	0	0	0	0	0	0	0	0	0	0	0	0	0	0	0	0	0	0	0
0	0	0	0	0	0	0	0	0	0	0	0	0	0	0	0	0	0	0	0	0	0	0	0	0	0	0	0	0	0	0	0	0	0	0	0	0	0	0	0	0	0	0	0	0	0	0	0	0	0
0	0	0	0	0	0	0	0	0	0	0	0	0	0	0	0	0	0	0	0	0	0	0	0	0	0	0	0	0	0	0	0	0	0	0	0	0	0	0	0	0	0	0	0	0	0	0	0	0	0
0	0	0	0	0	0	0	0	0	0	0	0	0	0	0	0	0	0	0	0	0	0	0	0	0	0	0	0	0	0	0	0	0	0	0	0	0	0	0	0	0	0	0	0	0	0	0	0	0	0
0	0	0	0	0	0	0	0	0	0	0	0	0	0	0	0	0	0	0	0	0	0	0	0	0	0	0	0	0	0	0	0	0	0	0	0	0	0	0	0	0	0	0	0	0	0	0	0	0	0
0	0	0	0	0	0	0	0	0	0	0	0	0	0	0	0	0	0	0	0	0	0	0	0	0	0	0	0	0	0	0	0	0	0	0	0	0	0	0	0	0	0	0	0	0	0	0	0	0	0
0	0	0	0	0	0	0	0	0	0	0	0	0	0	0	0	0	0	0	0	0	0	0	0	0	0	0	0	0	0	0	0	0	0	0	0	0	0	0	0	0	0	0	0	0	0	0	0	0	0
0	0	0	0	0	0	0	0	0	0	0	0	0	0	0	0	0	0	0	0	0	0	0	0	0	0	0	0	0	0	0	0	0	0	0	0	0	0	0	0	0	0	0	0	0	0	0	0	0	0
0	0	0	0	0	0	0	0	0	0	0	0	0	0	0	0	0	0	0	0	0	0	0	0	0	0	0	0	0	0	0	0	0	0	0	0	0	0	0	0	0	0	0	0	0	0	0	0	0	0
0	0	0	0	0	0	0	0	0	0	0	0	0	0	0	0	0	0	0	0	0	0	0	0	0	0	0	0	0	0	0	0	0	0	0	0	0	0	0	0	0	0	0	0	0	0	0	0	0	0
0	0	0	0	0	0	0	0	0	0	0	0	0	0	0	0	0	0	0	0	0	0	0	0	0	0	0	0	0	0	0	0	0	0	0	0	0	0	0	0	0	0	0	0	0	0	0	0	0	0
0	0	0	0	0	0	0	0	0	0	0	0	0	0	0	0	0	0	0	0	0	0	0	0	0	0	0	0	0	0	0	0	0	0	0	0	0	0	0	0	0	0	0	0	0	0	0	0	0	0
0	0	0	0	0	0	0	0	0	0	0	0	0	0	0	0	0	0	0	0	0	0	0	0	0	0	0	0	0	0	0	0	0	0	0	0	0	0	0	0	0	0	0	0	0	0	0	0	0	0
0	0	0	0	0	0	0	0	0	0	0	0	0	0	0	0	0	0	0	0	0	0	0	0	0	0	0	0	0	0	0	0	0	0	0	0	0	0	0	0	0	0	0	0	0	0	0	0	0	0
0	0	0	0	0	0	0	0	0	0	0	0	0	0	0	0	0	0	0	0	0	0	0	0	0	0	0	0	0	0	0	0	0	0	0	0	0	0	0	0	0	0	0	0	0	0	0	0	0	0
0	0	0	0	0	0	0	0	0	0	0	0	0	0	0	0	0	0	0	0	0	0	0	0	0	0	0	0	0	0	0	0	0	0	0	0	0	0	0	0	0	0	0	0	0	0	0	0	0	0
0	0	0	0	0	0	0	0	0	0	0	0	0	0	0	0	0	0	0	0	0	0	0	0	0	0	0	0	0	0	0	0	0	0	0	0	0	0	0	0	0	0	0	0	0	0	0	0	0	0
0	0	0	0	0	0	0	0	0	0	0	0	0	0	0	0	0	0	0	0	0	0	0	0	0	0	0	0	0	0	0	0	0	0	0	0	0	0	0	0	0	0	0	0	0	0	0	0	0	0
0	0	0	0	0	0	0	0	0	0	0	0	0	0	0	0	0	0	0	0	0	0	0	0	0	0	0	0	0	0	0	0	0	0	0	0	0	0	0	0	0	0	0	0	0	0	0	0	0	0
0	1.39794	0.30103	0.69897	0	0.60206	0	0	0	0	0	0	0	0	0	0	0	0	0	0	0	0	0	0	0	0	0	0	0	0	0	0	0	0	0	0	0	0	0	0	0	0	0	0	0	0	0	0	0	0
0	0	0.778151	0.477121	0	0	0	0	0	0	0	0	0	0	0	0	0	0	0	0	0	0	0	0	0	0	0	0	0	0	0	0	0	0	0	0	0	0	0	0	0	0	0	0	0	0	0	0	0	0
0	0.477121	0	0.30103	0	0	0	0	0	0	0	0	0	0	0	0	0	0	0	0	0	0	0	0	0	0	0	0	0	0	0	0	0	0	0	0	0	0	0	0	0	0	0	0	0	0	0	0	0	0
0	0	0.477121	0	0	0	0	0	0	0	0	0	0	0	0	0	0	0	0	0	0	0	0	0	0	0	0	0	0	0	0	0	0	0	0	0	0	0	0	0	0	0	0	0	0	0	0	0	0	0
0	0	0	0	0	0	0	0	0	0	0	0	0	0	0	0	0	0	0	0	0	0	0	0	0	0	0	0	0	0	0	0	0	0	0	0	0	0	0	0	0	0	0	0	0	0	0	0	0	0
0	0	0	0	0	0	0	0	0	0	0	0	0	0	0	0	0	0	0	0	0	0	0	0	0	0	0	0	0	0	0	0	0	0	0	0	0	0	0	0	0	0	0	0	0	0	0	0	0	0
0	0	0	0	0	0	0	0	0	0	0	0	0	0	0	0	0	0	0	0	0	0	0	0	0	0	0	0	0	0	0	0	0	0	0	0	0	0	0	0	0	0	0	0	0	0	0	0	0	0
0	0	0	0	0	0	0	0	0	0	0	0	0	0	0	0	0	0	0	0	0	0	0	0	0	0	0	0	0	0	0	0	0	0	0	0	0	0	0	0	0	0	0	0	0	0	0	0	1.85733	0
0	0	0	0	0	0	0	0	0	0	0	0	0	0	0	0	0	0	0	0	0	0	0	0	0	0	0	0	0	0	0	0	0	0	0	0	0	0	0	0	0	0	0	0	0	0	0	0	0	0
0	0	0	0	0	0	1.5563	0	0	0	0	0	0	0	0	0	0	0	0	0	0	0	0	0	0	0	0	0	0	0	0	0	0	0	0	0	0	0	0	0	0	0	0	0	0	0	0	0	0	0
0	0	0	0	0	0	0	0	0	0	0	0	0	0	0	0	0	0	0	0	0	0	0	0	0	0.69897	0.60206	2.8739	3.25744	0	0	0	0	0	0	0	0	0	0	0	0	0	0	0	0	0	0	0	0	0
0	0	0	0	0	0	0	0	0	0	0	0	0	0	0	0	0	0	0	0	0	0	0	0	0	0	0	0	3.90623	0	0	0	0	0	0	0	0	0	0	0	0	0	0	0	0	0	0	0	0	0
0	0	0	0	0	0	0	0	0	0	0	0	0	0	0	0	0	0	0	0	0	0	0	0	0	0	0	0	0	0	0	0	0	0	0	0	0	0	0	0	0	0	0	0	0	0	0	0	0	0
0	0	0	0	0	0	0	0	0	0	0	0	0	0	0	0	0	0	0	0	0	0	0	0	0	0	0	0	0	0	0	0	0	0	0	0	0	0	0	0	0	0	0	0	0	0	0	0	0	0
0	0	0	0	0	0	0	0	0	0	0	0	0	0	0	0	0	0	0	0	0	0	0	0	0	0	0	0	0	0	0	0	0	0	0	0	0	0	0	0	0	0	0	0	0	0	0	0	0	0
0	0	0	0	0	0	1.85733	0	0	0	0	0	0	0	0	0	0	0	0	0	0	0.30103	0	0	0	0	0	0	0.477121	0	0	0	0	0	0	0	0	0	0	0	0	0	0	0	0	0	0	0	0	0
0	0	0	0	0	0	0.30103	0	0	0	0	0	0	0	0	0	0	0	0	0	0	0.30103	0	0	0	0	0	0	2.32015	0	0	0	0	0	0	0	0	0	0	0	0	0	0	0	0	0	0	0	0	0
0	0	0	0	0	0	0	0	0	0	0	0	0	0	0	0	0	0	0	0	0	0	0	0	0	0	0	0	0	0	0	0	0	0	0	0	0	0	0	0	0	0	0	0	0	0	0	0	0	0
0	0	0	0	0	0	0	0	0	0	0	0	0	0	0	0	0	0	0	0	0	0	0	0	0	0	0	0	0	0	0	0	0	0	0	0	0	0	0	0	0	0	0	0	2.53148	0	0	0	0	0
0	0	0	0	0	0	1.38021	0	0	0	0	0	0	0	0	0	0	0	0	0	0	0	0	0	0	0	0	0	0	0	0	0	0	0	0	0	0	0	0	0	0	0	0	0	0	0	0	0	0	0
0	0	0	0	0	0	0	0	0	0	0	0	0	0	0	0	0	0	0	0	0	0	0	0	0	0	0	0	0	0	0	0	0	0	0	0	0	0	0	0	0	0	0	0	0	0	0	0	0	0
0	0	0	0	0	0	0	0	0	0	0	0	0	0	0	0	0	0	0	0	0	0	0	0	0	1.11394	0.60206	0	0	0	0	0	0	0	0	0	0	0	0	0	0	0	0	0	0	0	0	0	0	0
0	0	0	0	0	0	0	0	0	0	0	0	0	0	0	0	0	0	0	0	0	0	0	0	0	1.07918	0.90309	2.32222	4.73442	0	0	0	0	0	0	0	0	0	0	0	0	0	0	0	0	0	0	0	0	0
0	0	0	0	0	0	0	0	0	0	0	0	0	0	0	0	0	0	0	0	0	0	0	0	0	0	0	0	3.69618	0	0	0	0	0	0	0	0	0	0	0	0	0	0	0	0	0	0	0	0	0
0	0	0	0	0	0	0	0	0	0	0	0	0	0	0	0	0	0	0	0	0	0	0	0	0	0	0	0	0	0	0	0	0	0	0	0	0	0	0	0	0	0	0	0	0	0	0	0	0	0
0	0	0	0	0	0	0	0	0	0	0	0	0	0	0	0	0	0	0	0	0	0.30103	0	1.30103	0	0	0	0	0	0	0	0	0	0	0	0	0	0	0	0	0	0	0	0	0.778151	0	0	0	0	0
0	0	0	0	0	0	1.38021	0	0	0	0	0	0	0	0	0	0	0	0	0	0	0	0	0	0	0	0	0	1.30103	0	0	0	0	0	0	0	0	0	0	0	0	0	0	0	0	0	0	0	0	0
0	0	0	0	0	0	0	0	0	0	0	0	0	0	0	0	0	0	0	0	0	0	0	0	0	0	0	0	0	0	0	0	0	0	0	0	0	0	0	0	0	0	0	0	0	0	0	0	0	0
0	0	0	0	0	0	1.39794	0	0	0	0	0	0	0	0	0	0	0	0	0	0	0	0	0	0	0	0	0	0.90309	0	0	0	0	0	0	0	0	0	0	0	0	0	0	0	0	0	0	0	0	0
0	0	0	0	0	0	0.60206	0	0	0	0	0	0	0	0	0	0	0	0	0	0	0	0	0	0	0	0	0	2.42488	0	0	0	0	0	0	0	0	0	0	0	0	0	0	0	0	0	0	0	0	0
0	0	0	0	0	0	0	0	0	0	0	0	0	0	0	0	0	0	0	0	0	0	0	1.20412	0	0	0	0	0	0	0	0	0	0	0	0	0	0	0	0	0	0	0	0	0	0	0	0	0	0
0	0	0	0	0	0	0	0	0	0	0	0	0	0	0	0	0	0	0	0	0	0	0	0	0	0	0	0	0	0	0	0	0	0	0	0	0	0	0	0	0	0	0	0	0	0	0	0	0	0
0	0	0	0	0	0	0	0	0	0	0	0	0	0	0	0	0	0	0	0	0	0	0	0	0	0	0	0	0	0	0	0	0	0	0	0	0	0	0	0	0	0	0	0	0	0	0	0	0	0
0	0	0	0	0	0	0	0	0	0	0	0	0	0	0	0	0	0	0	0	0	0	0	0	0	0	0	0	0	0	0	0	0	0	0	0	0	0	0	0	0	0	0	0	0	0	0	0	0	0
0	0	0	0	0	0	0	0	0	0	0	0	0	0	0	0	0	0	0	0	0	0	0	0	0	0	0	0	0	0	0	0	0	0	0	0	0	0	0	0	0	0	0	0	0	0	0	0	0	0
0	0	0	0	0	0	0	0	0	0	0	0	0	0	0	0	0	0	0	0	0	0	0	0	0	0	0	0	0	0	0	0	0	0	0	0	0	0	0	0	0	0	0	0	0	0	0	0	0	0
0	0	0	0	0	0	0	0	0	0	0	0	0	0	0	0	0	0	0	0	0	0	0	0	0	0	0	0	0	0	0	0	0	0	0	0	0	0	0	0	0	0	0	0	0	0	0	0	0	0
0	0	0	0	0	0	0	0	0	0	0	0	0	0	0	0	0	0	0	0	0	0	0	0	0	0	0	0	0	0	0	0	0	0	0	0	0	0	0	0	0	0	0	0	0	0	0	0	0	0
0	0	0	0	0	0	0	0	0	0	0	0	0	0	0	0	0	0	0	0	0	0	0	0	0	0	0	0	0	0	0	0	0	0	0	0	0	0	0	0	0	0	0	0	0	0	0	0	0	0
0	0	0	0	0	0	0	0	0	0	0	0	0	0	0	0	0	0	0	0	0	0	0	0	0	0	0	0	0	0	0	0	0	0	0	0	0	0	0	0	0	0	0	0	0	0	0	0	0	0
0	0	0	0	0	0	0	0	0	0	0	0	0	0	0	0	0	0	0	0	0	0	0	0	0	0	0	0	0	0	0	0	0	0	0	0	0	0	0	0	0	0	0	0	0	0	0	0	0	0
0	0	0	0	0	0	0	0	0	0	0	0	0	0	0	0	0	0	0	0	0	0	0	0	0	0	0	0	0	0	0	0	0	0	0	0	0	0	0	0	0	0	0	0	0	0	0	0	0	0
0	0	0	0	0	0	0	0	0	0	0	0	0	0	0	0	0	0	0	0	0	0	0	0	0	0	0	0	0	0	0	0	0	0	0	0	0	0	0	0	0	0	0	0	0	0	0	0	0	0
0	0	0	0	0	0	0	0	0	0	0	0	0	0	0	0	0	0	0	0	0	0	0	0	0	0	0	0	0	0	0	0	0	0	0	0	0	0	0	0	0	0	0	0	0	0	0	0	0	0
0	0	0	0	0	0	0	0	0	0	0	0	0	0	0	0	0	0	0	0	0	0	0	0	0	0	0	0	0	0	0	0	0	0	0	0	0	0	0	0	0	0	0	0	0	0	0	0	0	0
0	0	0	0	0	0	0	0	0	0	0	0	0	0	0	0	0	0	0	0	0	0	0	0	0	0	0	0	0	0	0	0	0	0	0	0	0	0	0	0	0	0	0	0	0	0	0	0	0	0
0	0	0	0	0	0	0	0	0	0	0	0	0	0	0	0	0	0	0	0	0	0	0	0	0	0	0	0	0	0	0	0	0	0	0	0	0	0	0	0	0	0	0	0	0	0	0	0	0	0
0	0	0	0	0	0	0	0	0	0	0	0	0	0	0	0	0	0	0	0	0	0	0	0	0	0	0	0	0	0	0	0	0	0	0	0	0	0	0	0	0	0	0	0	0	0	0	0	0	0
0	0	0	0	0	0	0	0	0	0	0	0	0	0	0	0	0	0	0	0	0	0	0	0	0	0	0	0	0	0	0	0	0	0	0	0	0	0	0	0	0	0	0	0	0	0	0	0	0	0
0	0	0	0	0	0	0	0	0	0	0	0	0	0	0	0	0	0	0	0	0	0	0	0	0	0	0	0	0	0	0	0	0	0	0	0	0	0	0	0	0	0	0	0	0	0	0	0	0	0
0	0	0	0	0	0	0	0	0	0	0	0	0	0	0	0	0	0	0	0	0	0	0	0	0	0	0	0	0	0	0	0	0	0	0	0	0	0	0	0	0	0	0	0	0	0	0	0	0	0
0	0	0	0	0	0	0	0	0	0	0	0	0	0	0	0	0	0	0	0	0	0	0	0	0	0	0	0	0	0	0	0	0	0	0	0	0	0	0	0	0	0	0	0	0	0	0	0	0	0
0	0	0	0	0	0	0	0	0	0	0	0	0	0	0	0	0	0	0	0	0	0	0	0	0	0	0	0	0	0	0	0	0	0	0	0	0	0	0	0	0	0	0	0	0	0	0	0	0	0
0	0	0	0	0	0	0	0	0	0	0	0	0	0	0	0	0	0	0	0	0	0	0	0	0	0	0	0	0	0	0	0	0	0	0	0	0	0	0	0	0	0	0	0	0	0	0	0	0	0
0	0	0	0	0	0	0	0	0	0	0	0	0	0	0	0	0	0	0	0	0	0	0	0	0	0	0	0	0	0	0	0	0	0	0	0	0	0	0	0	0	0	0	0	0	0	0	0	0	0
0	0	0	0	0	0	0	0	0	0	0	0	0	0	0	0	0	0	0	0	0	0	0	0	0	0	0	0	0	0	0	0	0	0	0	0	0	0	0	0	0	0	0	0	0	0	0	0	0	0
0	0	0	0	0	0	0	0	0	0	0	0	0	0	0	0	0	0	0	0	0	0	0	0	0	0	0	0	0	0	0	0	0	0	0	0	0	0	0	0	0	0	0	0	0	0	0	0	0	0
0	0	0	0	0	0	0	0	0	0	0	0	0	0	0	0	0	0	0	0	0	0	0	0	0	0	0	0	0	0	0	0	0	0	0	0	0	0	0	0	0	0	0	0	0	0	0	0	0	0
0	0	0	0	0	0	0	0	0	0	0	0	0	0	0	0	0	0	0	0	0	0	0	0	0	0	0	0	0	0	0	0	0	0	0	0	0	0	0	0	0	0	0	0	0	0	0	0	0	0
0	0	0	0	0	0	0	0	0	0	0	0	0	0	0	0	0	0	0	0	0	0	0	0	0	0	0	0	0	0	0	0	0	0	0	0	0	0	0	0	0	0	0	0	0	0	0	0	0	0
0	0	0	0	0	0	0	0	0	0	0	0	0	0	0	0	0	0	0	0	0	0	0	0	0	0	0	0	0	0	0	0	0	0	0	0	0	0	0	0	0	0	0	0	0	0	0	0	0	0
0	0	0	0	0	0	0	0	0	0	0	0	0	0	0	0	0	0	0	0	0	0	0	0	0	0	0	0	0	0	0	0	0	0	0	0	0	0	0	0	0	0	0	0	0	0	0	0	0	0
0	0	0	0	0	0	0	0	0	0	0	0	0	0	0	0	0	0	0	0	0	0	0	0	0	0	0	0	0	0	0	0	0	0	0	0	0	0	0	0	0	0	0	0	0	0	0	0	0	0
0	0	0	0	0	0	0	0	0	0	0	0	0	0	0	0	0	0	0	0	0	0	0	0	0	0	0	0	0	0	0	0	0	0	0	0	0	0	0	0	0	0	0	0	0	0	0	0	0	0
0	0	0	0	0	0	0	0	0	0	0	0	0	0	0	0	0	0	0	0	0	0	0	0	0	0	0	0	0	0	0	0	0	0	0	0	0	0	0	0	0	0	0	0	0	0	0	0	0	0
0	0	0	0	0	0	0	0	0	0	0	0	0	0	0	0	0	0	0	0	0	0	0	0	0	0	0	0	0	0	0	0	0	0	0	0	0	0	0	0	0	0	0	0	0	0	0	0	0	0
0	0	0	0	0	0	0	0	0	0	0	0	0	0	0	0	0	0	0	0	0	0	0	0	0	0	0	0	0	0	0	0	0	0	0	0	0	0	0	0	0	0	0	0	0	0	0	0	0	0
0	0	0	0	0	0	0	0	0	0	0	0	0	0	0	0	0	0	0	0	0	0	0	0	0	0	0	0	0	0	0	0	0	0	0	0	0	0	0	0	0	0	0	0	0	0	0	0	0	0
0	0	0	0	0	0	0	0	0	0	0	0	0	0	0	0	0	0	0	0	0	0	0	0	0	0	0	0	0	0	0	0	0	0	0	0	0	0	0	0	0	0	0	0	0	0	0	0	0	0
0	0	0	0	0	0	0	0	0	0	0	0	0	0	0	0	0	0	0	0	0	0	0	0	0	0	0	0	0	0	0	0	0	0	0	0	0	0	0	0	0	0	0	0	0	0	0	0	0	0
0	0	0	0	0	0	0	0	0	0	0	0	0	0	0	0	0	0	0	0	0	0	0	0	0	0	0	0	0	0	0	0	0	0	0	0	0	0	0	0	0	0	0	0	0	0	0	0	0	0
0	0	0	0	0	0	0	0	0	0	0	0	0	0	0	0	0	0	0	0	0	0	0	0	0	0	0	0	0	0	0	0	0	0	0	0	0	0	0	0	0	0	0	0	0	0	0	0	0	0
0	0	0	0	0	0	0	0	0	0	0	0	0	0	0	0	0	0	0	0	0	0	0	0	0	0	0	0	0	0	0	0	0	0	0	0	0	0	0	0	0	0	0	0	0	0	0	0	0	0
0	0	0	0	0	0	0	0	0	0	0	0	0	0	0	0	0	0	0	0	0	0	0	0	0	0	0	0	0	0	0	0	0	0	0	0	0	0	0	0	0	0	0	0	0	0	0	0	0	0
0	0	0	0	0	0	0	0	0	0	0	0	0	0	0	0	0	0	0	0	0	0	0	0	0	0	0	0	0	0	0	0	0	0	0	0	0	0	0	0	0	0	0	0	0	0	0	0	0	0
0	0	0	0	0	0	0	0	0	0	0	0	0	0	0	0	0	0	0	0	0	0	0	0	0	0	0	0	0	0	0	0	0	0	0	0	0	0	0	0	0	0	0	0	0	0	0	0	0	0
0	0	0	0	0	0	0	0	0	0	0	0	0	0	0	0	0	0	0	0	0	0	0	0	0	0	0	0	0	0	0	0	0	0	0	0	0	0	0	0	0	0	0	0	0	0	0	0	0	0
0	0	0	0	0	0	0	0	0	0	0	0	0	0	0	0	0	0	0	0	0	0	0	0	0	0	0	0	0	0	0	0	0	0	0	0	0	0	0	0	0	0	0	0	0	0	0	0	0	0
[truncated: 185 more columns]

## Sheet: 5C
bin1.mappable	bin2.mappable	V1	label
FALSE	FALSE	8830830	CNMxCNM
FALSE	TRUE	25135	CNUxCNM
TRUE	TRUE	90766	CNUxCNU
TRUE	FALSE	25135	CNUxCNM

## Sheet: 5D
location	homology	detected	mappable	fraction	color.level	location.level	homology.level	detected.level	mapped.level
CNU	yes	no	no	0.0499	unmappable NAHR	CNU	putative HR/MR	no	no
CNU	yes	no	yes	0	mappable NAHR	CNU	putative HR/MR	no	yes
CNU	yes	yes	no	0	unmappable NAHR	CNU	putative HR/MR	yes	no
CNU	yes	yes	yes	0	mappable NAHR	CNU	putative HR/MR	yes	yes
CNU	no	no	no	0.1231	unmappable non-NAHR	CNU	non-nahr	no	no
CNU	no	no	yes	0	mappable non-NAHR	CNU	non-nahr	no	yes
CNU	no	yes	no	0	unmappable non-NAHR	CNU	non-nahr	yes	no
CNU	no	yes	yes	0	mappable non-NAHR	CNU	non-nahr	yes	yes
CNM	yes	no	no	0.0001	unmappable NAHR	CNM	putative HR/MR	no	no
CNM	yes	no	yes	0	mappable NAHR	CNM	putative HR/MR	no	yes
CNM	yes	yes	no	0.0009	unmappable NAHR	CNM	putative HR/MR	yes	no
CNM	yes	yes	yes	0	mappable NAHR	CNM	putative HR/MR	yes	yes
CNM	no	no	no	0.083	unmappable non-NAHR	CNM	non-nahr	no	no
CNM	no	no	yes	0	mappable non-NAHR	CNM	non-nahr	no	yes
CNM	no	yes	no	0.074	unmappable non-NAHR	CNM	non-nahr	yes	no
CNM	no	yes	yes	0.669	mappable non-NAHR	CNM	non-nahr	yes	yes
