# Supplementary material for: Most large structural variants in cancer genomes can be detected without long reads
Source: Nat Genet. 2023 Nov 9;55(12):2139–48. doi: 10.1038/s41588-023-01540-6 (PMC10703688; doi:10.1038/s41588-023-01540-6)
Supplement: Supplementary file 8 — Statistical source data for Extended Data Fig. 1. [file 41588_2023_1540_MOESM8_ESM.xlsx]

## Sheet: 1B
repmasker.coarse	mappable	cn.unmappable	width	mappable.coarse	frac
Telomere / sub	unassembled	unmappable	5.63777	unmappable	0.00182117
Telomere / sub	unmappable	unmappable	8.6263	unmappable	0.00278656
Telomere / sub	mappable	mappable	140.095	mappable	0.045255
Telomere / sub	unmappable	mappable	23.6428	unmappable	0.00763737
non-repeat	unmappable	mappable	313.121	unmappable	0.101148
non-repeat	mappable	mappable	2163.66	mappable	0.698931
non-repeat	unmappable	unmappable	21.8176	unmappable	0.00704775
LCR	mappable	mappable	17.4676	mappable	0.00564258
LCR	unmappable	mappable	39.185	unmappable	0.012658
LCR	unmappable	unmappable	35.2644	unmappable	0.0113915
SINE	unmappable	unmappable	4.43674	unmappable	0.0014332
LCR	unassembled	unmappable	0.150771	unmappable	4.87037e-05
non-repeat	unassembled	unmappable	6.65392	unmappable	0.00214942
SINE	unmappable	mappable	0.856512	unmappable	0.00027668
non-repeat	unassembled	mappable	0.005182	unmappable	1.67395e-06
SINE	mappable	mappable	0.196329	mappable	6.34204e-05
LINE	unmappable	mappable	0.834344	unmappable	0.000269519
Other	unmappable	unmappable	5.5715	unmappable	0.00179977
Other	unmappable	mappable	0.183557	unmappable	5.92946e-05
Other	mappable	mappable	0.107028	mappable	3.45734e-05
LINE	unmappable	unmappable	11.5849	unmappable	0.0037423
LINE	mappable	mappable	0.198976	mappable	6.42754e-05
SINE	unassembled	unmappable	0.000236	unmappable	7.62353e-08
Centromeric / peri	unmappable	unmappable	30.6254	unmappable	0.00989297
Centromeric / peri	mappable	mappable	30.081	mappable	0.0097171
Centromeric / peri	unassembled	unmappable	223.361	unmappable	0.0721524
Centromeric / peri	unmappable	mappable	12.3064	unmappable	0.00397536
LINE	unassembled	mappable	4e-05	unmappable	1.29212e-08
LINE	unassembled	unmappable	0.000107	unmappable	3.45643e-08
Other	unassembled	unmappable	0.000464	unmappable	1.49886e-07
Centromeric / peri	unassembled	mappable	0.000197	unmappable	6.36371e-08
SINE	unassembled	mappable	0.00011	unmappable	3.55334e-08
Telomere / sub	unassembled	mappable	0.002179	unmappable	7.03885e-07
LCR	unassembled	mappable	5e-05	unmappable	1.61516e-08

## Sheet: 1C
tile.id	seqnames	start	end	variance	cn_unmappable	junction_unmappable	sample	label	std
3241	1	32400001	32410000	0.0276077	1	0	4175837	CN unmappable	0.332311
62762	3	135150001	135160000	0.0149485	1	0	4175837	CN unmappable	0.244528
83479	4	144290001	144300000	0.00965347	0	1	4175837	junction unmappable	0.196504
84529	4	154790001	154800000	0.00469992	0	1	4175837	junction unmappable	0.137112
89649	5	14830001	14840000	0.00633493	1	0	4175837	CN unmappable	0.159185
120593	6	143350001	143360000	0.00985044	0	1	4175837	junction unmappable	0.198499
136042	7	126720001	126730000	0.00354373	0	1	4175837	junction unmappable	0.119058
169295	8	144830001	144840000	0.210093	1	0	4175837	CN unmappable	0.916718
174035	9	45860001	45870000	84.7522	1	0	4175837	CN unmappable	18.4122
202045	11	49200001	49210000	0.00599414	0	1	4175837	junction unmappable	0.154844
205248	11	81230001	81240000	0.00871483	1	0	4175837	CN unmappable	0.186706
218065	12	74390001	74400000	0.00841482	0	1	4175837	junction unmappable	0.183465
229877	13	58650001	58660000	0.00754854	0	0	4175837	mappable	0.173765
238700	14	31710001	31720000	0.0193713	1	0	4175837	CN unmappable	0.278361
248859	15	25950001	25960000	0.0126785	0	0	4175837	mappable	0.225197
249357	15	30930001	30940000	0.0192128	1	0	4175837	CN unmappable	0.27722
252932	15	66680001	66690000	0.0264117	0	1	4175837	junction unmappable	0.325034
277269	18	35950001	35960000	0.00790851	0	1	4175837	junction unmappable	0.17786
296859	19	31360001	31370000	0.022556	0	0	4175837	mappable	0.300373
287634	20	61520001	61530000	0.0122222	0	1	4175837	junction unmappable	0.221108
139397	X	1130001	1140000	17.8081	1	0	4175837	CN unmappable	8.43993
151498	X	122140001	122150000	0.0373344	1	0	4175837	CN unmappable	0.386442
153809	X	145250001	145260000	0.0179392	0	1	4175837	junction unmappable	0.267874
29037	2	41100001	41110000	0.0107635	0	0	1570	mappable	0.207494
41463	2	165360001	165370000	0.0145078	0	1	1570	junction unmappable	0.240896
46367	2	214400001	214410000	0.012366	0	1	1570	junction unmappable	0.222405
111575	6	53170001	53180000	0.0135473	1	0	1570	CN unmappable	0.232786
118987	6	127290001	127300000	0.0280268	0	1	1570	junction unmappable	0.334824
130878	7	75080001	75090000	0.0113938	1	0	1570	CN unmappable	0.213483
131605	7	82350001	82360000	0.016783	0	1	1570	junction unmappable	0.259099
137722	7	143520001	143530000	179.149	1	0	1570	CN unmappable	26.7693
139040	7	156700001	156710000	0.0111597	1	0	1570	CN unmappable	0.211279
157546	8	27340001	27350000	0.00681231	0	1	1570	junction unmappable	0.165073
178479	9	90300001	90310000	0.00685199	0	1	1570	junction unmappable	0.165554
227140	13	31280001	31290000	0.0158258	0	1	1570	junction unmappable	0.251601
228916	13	49040001	49050000	7.05749	1	0	1570	CN unmappable	5.31319
240562	14	50330001	50340000	0.00887741	0	1	1570	junction unmappable	0.18844
248625	15	23610001	23620000	0.0115907	1	0	1570	CN unmappable	0.21532
249628	15	33640001	33650000	0.0176539	1	0	1570	CN unmappable	0.265736
255369	15	91050001	91060000	0.0141434	0	1	1570	junction unmappable	0.237852
275973	18	22990001	23000000	0.00452202	0	0	1570	mappable	0.134492
293776	19	530001	540000	0.0129632	1	0	1570	CN unmappable	0.227712
303907	22	42710001	42720000	0.0140387	0	1	1570	junction unmappable	0.23697
147407	X	81230001	81240000	0.0182304	1	0	1570	CN unmappable	0.27004
29239	2	43120001	43130000	0.0141967	0	1	3807	junction unmappable	0.2383
34861	2	99340001	99350000	0.241658	0	1	3807	junction unmappable	0.983175
35843	2	109160001	109170000	0.012752	1	0	3807	CN unmappable	0.22585
37377	2	124500001	124510000	0.0172288	1	0	3807	CN unmappable	0.262517
57131	3	78840001	78850000	0.0101916	1	0	3807	CN unmappable	0.201907
91393	5	32270001	32280000	0.012132	0	1	3807	junction unmappable	0.220291
114065	6	78070001	78080000	0.0153498	0	1	3807	junction unmappable	0.247789
130695	7	73250001	73260000	0.00741734	1	0	3807	CN unmappable	0.172248
172685	9	32360001	32370000	0.0130048	1	0	3807	CN unmappable	0.228078
183278	9	138290001	138300000	0.0276718	0	1	3807	junction unmappable	0.332697
197550	11	4250001	4260000	0.088922	1	0	3807	CN unmappable	0.596396
200468	11	33430001	33440000	0.0121154	0	1	3807	junction unmappable	0.22014
212037	12	14110001	14120000	0.0187977	0	0	3807	mappable	0.274209
223711	12	130850001	130860000	0.0104261	0	1	3807	junction unmappable	0.204217
238153	14	26240001	26250000	0.0127725	1	0	3807	CN unmappable	0.226031
241288	14	57590001	57600000	0.00227363	1	0	3807	CN unmappable	0.0953652
245067	14	95380001	95390000	0.0188618	0	1	3807	junction unmappable	0.274676
245425	14	98960001	98970000	0.00899902	0	1	3807	junction unmappable	0.189726
279244	18	55700001	55710000	0.0167819	0	1	3807	junction unmappable	0.25909
285329	20	38470001	38480000	0.0178928	0	0	3807	mappable	0.267528
147715	X	84310001	84320000	0.0156886	1	0	3807	CN unmappable	0.250508
16873	1	168720001	168730000	0.0114739	0	1	995-24130-187V-32--995-25053N-119V-BLD	junction unmappable	0.214232
42245	2	173180001	173190000	12.5781	1	0	995-24130-187V-32--995-25053N-119V-BLD	CN unmappable	7.09312
45591	2	206640001	206650000	0.0179423	0	0	995-24130-187V-32--995-25053N-119V-BLD	mappable	0.267898
66149	3	169020001	169030000	0.00967875	0	1	995-24130-187V-32--995-25053N-119V-BLD	junction unmappable	0.196761
68857	3	196100001	196110000	0.0140207	0	1	995-24130-187V-32--995-25053N-119V-BLD	junction unmappable	0.236818
81952	4	129020001	129030000	0.0133925	0	1	995-24130-187V-32--995-25053N-119V-BLD	junction unmappable	0.231452
84985	4	159350001	159360000	0.160963	1	0	995-24130-187V-32--995-25053N-119V-BLD	CN unmappable	0.802405
95856	5	76900001	76910000	0.0312648	1	0	995-24130-187V-32--995-25053N-119V-BLD	CN unmappable	0.353637
116849	6	105910001	105920000	0.0214505	0	1	995-24130-187V-32--995-25053N-119V-BLD	junction unmappable	0.29292
155582	8	7700001	7710000	352.715	1	0	995-24130-187V-32--995-25053N-119V-BLD	CN unmappable	37.5614
179446	9	99970001	99980000	0.0211059	1	0	995-24130-187V-32--995-25053N-119V-BLD	CN unmappable	0.290557
183236	9	137870001	137880000	0.0208318	0	1	995-24130-187V-32--995-25053N-119V-BLD	junction unmappable	0.288664
198360	11	12350001	12360000	0.0148809	1	0	995-24130-187V-32--995-25053N-119V-BLD	CN unmappable	0.243974
202278	11	51530001	51540000	0.0057449	1	0	995-24130-187V-32--995-25053N-119V-BLD	CN unmappable	0.15159
208313	11	111880001	111890000	0.0120271	0	1	995-24130-187V-32--995-25053N-119V-BLD	junction unmappable	0.219336
241449	14	59200001	59210000	0.0187361	0	1	995-24130-187V-32--995-25053N-119V-BLD	junction unmappable	0.273759
259412	16	28940001	28950000	0.00861404	1	0	995-24130-187V-32--995-25053N-119V-BLD	CN unmappable	0.185624
272050	17	64960001	64970000	0.00716378	1	0	995-24130-187V-32--995-25053N-119V-BLD	CN unmappable	0.169278
278639	18	49650001	49660000	0.0122651	0	1	995-24130-187V-32--995-25053N-119V-BLD	junction unmappable	0.221496
294980	19	12570001	12580000	0.0216958	0	1	995-24130-187V-32--995-25053N-119V-BLD	junction unmappable	0.29459
154333	X	150490001	150500000	0.0160906	1	0	995-24130-187V-32--995-25053N-119V-BLD	CN unmappable	0.253697
9164	1	91630001	91640000	0.00678518	1	0	8340	CN unmappable	0.164744
38468	2	135410001	135420000	0.0180812	1	0	8340	CN unmappable	0.268933
55567	3	63200001	63210000	0.921115	1	0	8340	CN unmappable	1.91949
56110	3	68630001	68640000	0.470846	1	0	8340	CN unmappable	1.37236
59763	3	105160001	105170000	0.00231862	0	1	8340	junction unmappable	0.0963042
76676	4	76260001	76270000	0.0184072	0	1	8340	junction unmappable	0.271346
91590	5	34240001	34250000	0.0153831	1	0	8340	CN unmappable	0.248058
112604	6	63460001	63470000	0.00578796	0	1	8340	junction unmappable	0.152157
125577	7	22070001	22080000	0.00833661	0	1	8340	junction unmappable	0.18261
130232	7	68620001	68630000	0.00813823	0	1	8340	junction unmappable	0.180424
166978	8	121660001	121670000	0.0224587	1	0	8340	CN unmappable	0.299724
167791	8	129790001	129800000	0.0164483	0	1	8340	junction unmappable	0.256502
191274	10	77030001	77040000	0.0129329	1	0	8340	CN unmappable	0.227446
210386	11	132610001	132620000	0.00430339	0	1	8340	junction unmappable	0.131201
270737	17	51830001	51840000	0.0120395	1	0	8340	CN unmappable	0.219449
272737	17	71830001	71840000	0.0236276	0	1	8340	junction unmappable	0.307425
282593	20	11110001	11120000	0.0139241	0	1	8340	junction unmappable	0.236001
145502	X	62180001	62190000	0.704619	1	0	8340	CN unmappable	1.67883
145596	X	63120001	63130000	0.0074202	1	0	8340	CN unmappable	0.172281
148969	X	96850001	96860000	0.0304007	0	1	8340	junction unmappable	0.348716
2812	1	28110001	28120000	0.00299765	1	0	2691	CN unmappable	0.109502
58199	3	89520001	89530000	0.00995982	1	0	2691	CN unmappable	0.199598
58238	3	89910001	89920000	0.0368755	1	0	2691	CN unmappable	0.38406
62748	3	135010001	135020000	0.015885	0	1	2691	junction unmappable	0.252071
68789	3	195420001	195430000	0.0175812	1	0	2691	CN unmappable	0.265188
134626	7	112560001	112570000	0.0201806	1	0	2691	CN unmappable	0.284117
136199	7	128290001	128300000	0.0106368	1	0	2691	CN unmappable	0.20627
156062	8	12500001	12510000	0.0240952	1	0	2691	CN unmappable	0.310453
159735	8	49230001	49240000	0.00645855	0	1	2691	junction unmappable	0.16073
160500	8	56880001	56890000	0.0216965	0	1	2691	junction unmappable	0.294595
171111	9	16620001	16630000	0.00964722	0	1	2691	junction unmappable	0.196441
178667	9	92180001	92190000	0.00394699	0	1	2691	junction unmappable	0.12565
207921	11	107960001	107970000	0.0014945	0	1	2691	junction unmappable	0.0773175
219577	12	89510001	89520000	0.0053573	0	1	2691	junction unmappable	0.146387
220407	12	97810001	97820000	0.0210905	0	1	2691	junction unmappable	0.290451
259289	16	27710001	27720000	0.00442737	0	1	2691	junction unmappable	0.133077
268818	17	32640001	32650000	0.0182711	0	0	2691	mappable	0.270341
302181	22	25450001	25460000	2.67319	1	0	2691	CN unmappable	3.26998
142224	X	29400001	29410000	0.0203868	0	1	2691	junction unmappable	0.285565
144561	X	52770001	52780000	28.0871	1	0	2691	CN unmappable	10.5994
147670	X	83860001	83870000	0.0163206	1	0	2691	CN unmappable	0.255504
15947	1	159460001	159470000	0.0133587	0	1	9c1aa33d8cca6743039c73afa57991b46d5aae3796e1a1d2f7ad8480deb57bf7	junction unmappable	0.23116
36607	2	116800001	116810000	0.137861	1	0	9c1aa33d8cca6743039c73afa57991b46d5aae3796e1a1d2f7ad8480deb57bf7	CN unmappable	0.742592
47145	2	222180001	222190000	0.00771297	0	0	9c1aa33d8cca6743039c73afa57991b46d5aae3796e1a1d2f7ad8480deb57bf7	mappable	0.175647
70446	4	13960001	13970000	0.0137798	0	1	9c1aa33d8cca6743039c73afa57991b46d5aae3796e1a1d2f7ad8480deb57bf7	junction unmappable	0.234775
85793	4	167430001	167440000	0.00918779	0	1	9c1aa33d8cca6743039c73afa57991b46d5aae3796e1a1d2f7ad8480deb57bf7	junction unmappable	0.191706
91513	5	33470001	33480000	0.00942727	0	1	9c1aa33d8cca6743039c73afa57991b46d5aae3796e1a1d2f7ad8480deb57bf7	junction unmappable	0.194188
93226	5	50600001	50610000	0.0166482	1	0	9c1aa33d8cca6743039c73afa57991b46d5aae3796e1a1d2f7ad8480deb57bf7	CN unmappable	0.258056
132317	7	89470001	89480000	0.00567653	0	1	9c1aa33d8cca6743039c73afa57991b46d5aae3796e1a1d2f7ad8480deb57bf7	junction unmappable	0.150686
174145	9	46960001	46970000	25.9813	1	0	9c1aa33d8cca6743039c73afa57991b46d5aae3796e1a1d2f7ad8480deb57bf7	CN unmappable	10.1944
183378	9	139290001	139300000	0.0243711	1	0	9c1aa33d8cca6743039c73afa57991b46d5aae3796e1a1d2f7ad8480deb57bf7	CN unmappable	0.312225
186095	10	25240001	25250000	0.0121212	0	1	9c1aa33d8cca6743039c73afa57991b46d5aae3796e1a1d2f7ad8480deb57bf7	junction unmappable	0.220192
196346	10	127750001	127760000	0.0122392	0	0	9c1aa33d8cca6743039c73afa57991b46d5aae3796e1a1d2f7ad8480deb57bf7	mappable	0.221261
218103	12	74770001	74780000	0.011861	1	0	9c1aa33d8cca6743039c73afa57991b46d5aae3796e1a1d2f7ad8480deb57bf7	CN unmappable	0.217816
225928	13	19160001	19170000	0.012756	1	0	9c1aa33d8cca6743039c73afa57991b46d5aae3796e1a1d2f7ad8480deb57bf7	CN unmappable	0.225885
238802	14	32730001	32740000	0.0172464	1	0	9c1aa33d8cca6743039c73afa57991b46d5aae3796e1a1d2f7ad8480deb57bf7	CN unmappable	0.262651
262814	16	62960001	62970000	0.0137076	0	0	9c1aa33d8cca6743039c73afa57991b46d5aae3796e1a1d2f7ad8480deb57bf7	mappable	0.234159
269273	17	37190001	37200000	0.00590362	0	1	9c1aa33d8cca6743039c73afa57991b46d5aae3796e1a1d2f7ad8480deb57bf7	junction unmappable	0.15367
269968	17	44140001	44150000	0.0154637	0	1	9c1aa33d8cca6743039c73afa57991b46d5aae3796e1a1d2f7ad8480deb57bf7	junction unmappable	0.248706
271571	17	60170001	60180000	0.0154737	0	1	9c1aa33d8cca6743039c73afa57991b46d5aae3796e1a1d2f7ad8480deb57bf7	junction unmappable	0.248787
279821	18	61470001	61480000	0.00979888	0	1	9c1aa33d8cca6743039c73afa57991b46d5aae3796e1a1d2f7ad8480deb57bf7	junction unmappable	0.197979
297777	19	40540001	40550000	0.0235898	1	0	9c1aa33d8cca6743039c73afa57991b46d5aae3796e1a1d2f7ad8480deb57bf7	CN unmappable	0.30718
6440	1	64390001	64400000	0.126662	1	0	A0J4	CN unmappable	0.711793
11376	1	113750001	113760000	0.0162655	0	1	A0J4	junction unmappable	0.255073
38665	2	137380001	137390000	0.0135847	0	1	A0J4	junction unmappable	0.233107
40557	2	156300001	156310000	0.0265145	1	0	A0J4	CN unmappable	0.325666
55993	3	67460001	67470000	0.0183597	0	0	A0J4	mappable	0.270996
99907	5	117410001	117420000	0.00512222	0	1	A0J4	junction unmappable	0.143139
111129	6	48710001	48720000	0.0177133	1	0	A0J4	CN unmappable	0.266182
129780	7	64100001	64110000	0.0320397	1	0	A0J4	CN unmappable	0.357993
132269	7	88990001	89000000	0.0303543	0	1	A0J4	junction unmappable	0.34845
133362	7	99920001	99930000	0.0114622	1	0	A0J4	CN unmappable	0.214123
166699	8	118870001	118880000	0.0408741	0	1	A0J4	junction unmappable	0.404347
177244	9	77950001	77960000	0.0208717	1	0	A0J4	CN unmappable	0.288941
180167	9	107180001	107190000	0.00968081	0	1	A0J4	junction unmappable	0.196782
188123	10	45520001	45530000	0.00984189	1	0	A0J4	CN unmappable	0.198413
211193	12	5670001	5680000	0.0148929	0	1	A0J4	junction unmappable	0.244073
216430	12	58040001	58050000	0.177767	1	0	A0J4	CN unmappable	0.843248
220413	12	97870001	97880000	0.00389861	0	1	A0J4	junction unmappable	0.124878
231723	13	77110001	77120000	0.00438988	1	0	A0J4	CN unmappable	0.132512
238235	14	27060001	27070000	0.00483459	0	0	A0J4	mappable	0.139062
282479	20	9970001	9980000	0.00738896	0	1	A0J4	junction unmappable	0.171918
146610	X	73260001	73270000	0.0273068	0	1	A0J4	junction unmappable	0.330496
5433	1	54320001	54330000	0.0118893	0	1	EGAN00001000590_EGAN00001000591	junction unmappable	0.218076
17606	1	176050001	176060000	0.00902611	0	1	EGAN00001000590_EGAN00001000591	junction unmappable	0.190012
80127	4	110770001	110780000	0.00975743	0	1	EGAN00001000590_EGAN00001000591	junction unmappable	0.197559
103751	5	155850001	155860000	0.0385669	1	0	EGAN00001000590_EGAN00001000591	CN unmappable	0.392769
106124	5	179580001	179590000	0.0114462	0	1	EGAN00001000590_EGAN00001000591	junction unmappable	0.213974
108566	6	23080001	23090000	0.0158684	0	0	EGAN00001000590_EGAN00001000591	mappable	0.25194
122022	6	157640001	157650000	509.567	1	0	EGAN00001000590_EGAN00001000591	CN unmappable	45.1472
160376	8	55640001	55650000	0.00614555	0	0	EGAN00001000590_EGAN00001000591	mappable	0.156787
165255	8	104430001	104440000	0.0171532	0	1	EGAN00001000590_EGAN00001000591	junction unmappable	0.26194
168148	8	133360001	133370000	0.0117045	0	1	EGAN00001000590_EGAN00001000591	junction unmappable	0.216374
170236	9	7870001	7880000	0.00795477	1	0	EGAN00001000590_EGAN00001000591	CN unmappable	0.178379
178626	9	91770001	91780000	0.0416637	1	0	EGAN00001000590_EGAN00001000591	CN unmappable	0.408234
178794	9	93450001	93460000	0.0150539	1	0	EGAN00001000590_EGAN00001000591	CN unmappable	0.245389
215223	12	45970001	45980000	0.00563683	0	1	EGAN00001000590_EGAN00001000591	junction unmappable	0.150158
240873	14	53440001	53450000	0.00771329	0	1	EGAN00001000590_EGAN00001000591	junction unmappable	0.175651
254519	15	82550001	82560000	0.0139892	0	1	EGAN00001000590_EGAN00001000591	junction unmappable	0.236552
258119	16	16010001	16020000	0.00366434	0	1	EGAN00001000590_EGAN00001000591	junction unmappable	0.121068
258203	16	16850001	16860000	0.0211457	1	0	EGAN00001000590_EGAN00001000591	CN unmappable	0.290831
259905	16	33870001	33880000	0.041012	1	0	EGAN00001000590_EGAN00001000591	CN unmappable	0.405028
147178	X	78940001	78950000	0.0564674	1	0	EGAN00001000590_EGAN00001000591	CN unmappable	0.475257
149369	X	100850001	100860000	6.31003	1	0	EGAN00001000590_EGAN00001000591	CN unmappable	5.02395
154089	X	148050001	148060000	0.417643	1	0	EGAN00001000590_EGAN00001000591	CN unmappable	1.29251
31659	2	67320001	67330000	0.0141699	0	1	f9d19a40c8e96a56205af0a2f2b7290a94f07f82c9635cac07dd71c063a5fa64	junction unmappable	0.238075
51146	3	18990001	19000000	0.00628037	1	0	f9d19a40c8e96a56205af0a2f2b7290a94f07f82c9635cac07dd71c063a5fa64	CN unmappable	0.158498
54323	3	50760001	50770000	0.0153742	1	0	f9d19a40c8e96a56205af0a2f2b7290a94f07f82c9635cac07dd71c063a5fa64	CN unmappable	0.247986
62702	3	134550001	134560000	0.0165619	0	0	f9d19a40c8e96a56205af0a2f2b7290a94f07f82c9635cac07dd71c063a5fa64	mappable	0.257386
88037	4	189870001	189880000	0.012099	0	1	f9d19a40c8e96a56205af0a2f2b7290a94f07f82c9635cac07dd71c063a5fa64	junction unmappable	0.219991
112971	6	67130001	67140000	0.00742562	0	1	f9d19a40c8e96a56205af0a2f2b7290a94f07f82c9635cac07dd71c063a5fa64	junction unmappable	0.172344
115811	6	95530001	95540000	0.0206555	1	0	f9d19a40c8e96a56205af0a2f2b7290a94f07f82c9635cac07dd71c063a5fa64	CN unmappable	0.287441
160433	8	56210001	56220000	0.0144728	1	0	f9d19a40c8e96a56205af0a2f2b7290a94f07f82c9635cac07dd71c063a5fa64	CN unmappable	0.240606
170803	9	13540001	13550000	0.0133231	0	1	f9d19a40c8e96a56205af0a2f2b7290a94f07f82c9635cac07dd71c063a5fa64	junction unmappable	0.230851
176005	9	65560001	65570000	42.7285	1	0	f9d19a40c8e96a56205af0a2f2b7290a94f07f82c9635cac07dd71c063a5fa64	CN unmappable	13.0734
187947	10	43760001	43770000	0.15318	1	0	f9d19a40c8e96a56205af0a2f2b7290a94f07f82c9635cac07dd71c063a5fa64	CN unmappable	0.782764
208828	11	117030001	117040000	0.00719673	0	1	f9d19a40c8e96a56205af0a2f2b7290a94f07f82c9635cac07dd71c063a5fa64	junction unmappable	0.169667
215192	12	45660001	45670000	0.0178803	0	1	f9d19a40c8e96a56205af0a2f2b7290a94f07f82c9635cac07dd71c063a5fa64	junction unmappable	0.267435
239751	14	42220001	42230000	0.00769959	0	1	f9d19a40c8e96a56205af0a2f2b7290a94f07f82c9635cac07dd71c063a5fa64	junction unmappable	0.175495
272041	17	64870001	64880000	0.0103326	0	1	f9d19a40c8e96a56205af0a2f2b7290a94f07f82c9635cac07dd71c063a5fa64	junction unmappable	0.203299
297083	19	33600001	33610000	0.0292435	0	1	f9d19a40c8e96a56205af0a2f2b7290a94f07f82c9635cac07dd71c063a5fa64	junction unmappable	0.342015
283965	20	24830001	24840000	0.00739259	0	1	f9d19a40c8e96a56205af0a2f2b7290a94f07f82c9635cac07dd71c063a5fa64	junction unmappable	0.17196
287758	20	62760001	62770000	0.0306053	1	0	f9d19a40c8e96a56205af0a2f2b7290a94f07f82c9635cac07dd71c063a5fa64	CN unmappable	0.349887
146399	X	71150001	71160000	0.00636064	0	0	f9d19a40c8e96a56205af0a2f2b7290a94f07f82c9635cac07dd71c063a5fa64	mappable	0.159507
146990	X	77060001	77070000	0.0266406	1	0	f9d19a40c8e96a56205af0a2f2b7290a94f07f82c9635cac07dd71c063a5fa64	CN unmappable	0.326439
152164	X	128800001	128810000	0.00859901	1	0	f9d19a40c8e96a56205af0a2f2b7290a94f07f82c9635cac07dd71c063a5fa64	CN unmappable	0.185462
32892	2	79650001	79660000	0.00521935	0	0	806-24154-225T-37--806-25035N-53S-BLD	mappable	0.14449
36239	2	113120001	113130000	254.045	1	0	806-24154-225T-37--806-25035N-53S-BLD	CN unmappable	31.8776
60137	3	108900001	108910000	0.00889313	0	1	806-24154-225T-37--806-25035N-53S-BLD	junction unmappable	0.188607
86580	4	175300001	175310000	0.0426334	1	0	806-24154-225T-37--806-25035N-53S-BLD	CN unmappable	0.412957
88286	5	1200001	1210000	0.0278309	0	0	806-24154-225T-37--806-25035N-53S-BLD	mappable	0.333652
93882	5	57160001	57170000	0.0144333	1	0	806-24154-225T-37--806-25035N-53S-BLD	CN unmappable	0.240278
106307	6	490001	500000	0.00726751	0	1	806-24154-225T-37--806-25035N-53S-BLD	junction unmappable	0.170499
118798	6	125400001	125410000	0.0151341	0	0	806-24154-225T-37--806-25035N-53S-BLD	mappable	0.246041
165825	8	110130001	110140000	0.0151188	0	0	806-24154-225T-37--806-25035N-53S-BLD	mappable	0.245917
183353	9	139040001	139050000	0.0125564	1	0	806-24154-225T-37--806-25035N-53S-BLD	CN unmappable	0.224111
186593	10	30220001	30230000	0.011964	0	1	806-24154-225T-37--806-25035N-53S-BLD	junction unmappable	0.21876
188283	10	47120001	47130000	0.00240586	1	0	806-24154-225T-37--806-25035N-53S-BLD	CN unmappable	0.0980991
206376	11	92510001	92520000	0.010666	0	1	806-24154-225T-37--806-25035N-53S-BLD	junction unmappable	0.206553
217408	12	67820001	67830000	0.00999712	0	1	806-24154-225T-37--806-25035N-53S-BLD	junction unmappable	0.199971
232945	13	89330001	89340000	0.0169105	1	0	806-24154-225T-37--806-25035N-53S-BLD	CN unmappable	0.260081
235042	13	110300001	110310000	0.0132204	0	1	806-24154-225T-37--806-25035N-53S-BLD	junction unmappable	0.22996
249868	15	36040001	36050000	0.0124718	0	1	806-24154-225T-37--806-25035N-53S-BLD	junction unmappable	0.223354
269021	17	34670001	34680000	66.0979	1	0	806-24154-225T-37--806-25035N-53S-BLD	CN unmappable	16.2601
270280	17	47260001	47270000	0.0198825	0	1	806-24154-225T-37--806-25035N-53S-BLD	junction unmappable	0.28201
302175	22	25390001	25400000	0.00802894	0	1	806-24154-225T-37--806-25035N-53S-BLD	junction unmappable	0.179209
146227	X	69430001	69440000	0.00945956	1	0	806-24154-225T-37--806-25035N-53S-BLD	CN unmappable	0.194521
147316	X	80320001	80330000	0.0157636	1	0	806-24154-225T-37--806-25035N-53S-BLD	CN unmappable	0.251107
148348	X	90640001	90650000	0.0227474	0	1	806-24154-225T-37--806-25035N-53S-BLD	junction unmappable	0.301645
149437	X	101530001	101540000	0.416083	1	0	806-24154-225T-37--806-25035N-53S-BLD	CN unmappable	1.29009
5384	1	53830001	53840000	0.0104044	0	1	A2N1	junction unmappable	0.204004
18677	1	186760001	186770000	0.0183014	0	1	A2N1	junction unmappable	0.270566
28022	2	30950001	30960000	0.00443566	0	0	A2N1	mappable	0.133202
70519	4	14690001	14700000	0.00356564	0	1	A2N1	junction unmappable	0.119426
71465	4	24150001	24160000	0.0104778	0	0	A2N1	mappable	0.204722
78645	4	95950001	95960000	0.0103647	1	0	A2N1	CN unmappable	0.203615
80608	4	115580001	115590000	0.0112377	0	1	A2N1	junction unmappable	0.212016
84237	4	151870001	151880000	0.00946085	0	1	A2N1	junction unmappable	0.194534
101967	5	138010001	138020000	0.00672727	1	0	A2N1	CN unmappable	0.16404
128134	7	47640001	47650000	0.00863027	0	1	A2N1	junction unmappable	0.185799
129837	7	64670001	64680000	0.0130527	1	0	A2N1	CN unmappable	0.228496
162046	8	72340001	72350000	0.0209433	0	0	A2N1	mappable	0.289436
202037	11	49120001	49130000	1.96643	1	0	A2N1	CN unmappable	2.80459
202258	11	51330001	51340000	0.00688947	1	0	A2N1	CN unmappable	0.166006
208049	11	109240001	109250000	0.00984794	0	1	A2N1	junction unmappable	0.198474
243208	14	76790001	76800000	16.8524	1	0	A2N1	CN unmappable	8.21034
268391	17	28370001	28380000	0.00495962	0	1	A2N1	junction unmappable	0.140849
278747	18	50730001	50740000	0.0130755	1	0	A2N1	CN unmappable	0.228696
280326	18	66520001	66530000	0.0988178	1	0	A2N1	CN unmappable	0.628706
307541	21	27740001	27750000	0.0134021	0	1	A2N1	junction unmappable	0.231535
309198	21	44310001	44320000	0.0156693	1	0	A2N1	CN unmappable	0.250354
147171	X	78870001	78880000	0.0120005	0	1	A2N1	junction unmappable	0.219094
148149	X	88650001	88660000	0.0521029	1	0	A2N1	CN unmappable	0.456521
14638	1	146370001	146380000	32.1617	1	0	PR-06-3199	CN unmappable	11.3423
16160	1	161590001	161600000	0.057437	1	0	PR-06-3199	CN unmappable	0.47932
45238	2	203110001	203120000	0.00717619	1	0	PR-06-3199	CN unmappable	0.169425
46347	2	214200001	214210000	0.0154197	0	1	PR-06-3199	junction unmappable	0.248352
49156	2	242290001	242300000	0.0217149	1	0	PR-06-3199	CN unmappable	0.294719
60309	3	110620001	110630000	0.0161631	0	1	PR-06-3199	junction unmappable	0.254268
89992	5	18260001	18270000	0.00902876	1	0	PR-06-3199	CN unmappable	0.19004
96784	5	86180001	86190000	0.00994275	0	1	PR-06-3199	junction unmappable	0.199427
99800	5	116340001	116350000	0.0106743	0	1	PR-06-3199	junction unmappable	0.206633
115736	6	94780001	94790000	0.00922658	0	0	PR-06-3199	mappable	0.19211
119412	6	131540001	131550000	0.019629	0	1	PR-06-3199	junction unmappable	0.280207
129885	7	65150001	65160000	0.00213594	1	0	PR-06-3199	CN unmappable	0.0924326
170650	9	12010001	12020000	0.0152975	0	1	PR-06-3199	junction unmappable	0.247366
173611	9	41620001	41630000	80.0473	1	0	PR-06-3199	CN unmappable	17.8938
179736	9	102870001	102880000	0.0237227	0	1	PR-06-3199	junction unmappable	0.308043
185088	10	15170001	15180000	0.00672331	0	1	PR-06-3199	junction unmappable	0.163992
198993	11	18680001	18690000	0.0105454	1	0	PR-06-3199	CN unmappable	0.205382
234934	13	109220001	109230000	0.00767179	0	1	PR-06-3199	junction unmappable	0.175177
259471	16	29530001	29540000	31.2883	1	0	PR-06-3199	CN unmappable	11.1872
272307	17	67530001	67540000	0.0205523	0	1	PR-06-3199	junction unmappable	0.286721
5633	1	56320001	56330000	0.0106033	0	0	1047-24274-180B-28--1047-24964N-180B-GST	mappable	0.205945
14262	1	142610001	142620000	0.00781923	1	0	1047-24274-180B-28--1047-24964N-180B-GST	CN unmappable	0.176853
27900	2	29730001	29740000	0.0236373	1	0	1047-24274-180B-28--1047-24964N-180B-GST	CN unmappable	0.307488
27921	2	29940001	29950000	0.00915104	0	1	1047-24274-180B-28--1047-24964N-180B-GST	junction unmappable	0.191322
54642	3	53950001	53960000	0.0353746	1	0	1047-24274-180B-28--1047-24964N-180B-GST	CN unmappable	0.376163
112555	6	62970001	62980000	0.00856801	0	0	1047-24274-180B-28--1047-24964N-180B-GST	mappable	0.185127
115843	6	95850001	95860000	0.00317999	0	1	1047-24274-180B-28--1047-24964N-180B-GST	junction unmappable	0.112783
129774	7	64040001	64050000	0.00830954	0	1	1047-24274-180B-28--1047-24964N-180B-GST	junction unmappable	0.182313
131086	7	77160001	77170000	0.00908993	1	0	1047-24274-180B-28--1047-24964N-180B-GST	CN unmappable	0.190682
165876	8	110640001	110650000	0.0123987	0	1	1047-24274-180B-28--1047-24964N-180B-GST	junction unmappable	0.222699
167570	8	127580001	127590000	0.00973336	1	0	1047-24274-180B-28--1047-24964N-180B-GST	CN unmappable	0.197316
173343	9	38940001	38950000	0.917916	1	0	1047-24274-180B-28--1047-24964N-180B-GST	CN unmappable	1.91616
189901	10	63300001	63310000	0.0052875	0	1	1047-24274-180B-28--1047-24964N-180B-GST	junction unmappable	0.14543
196550	10	129790001	129800000	0.0156829	0	0	1047-24274-180B-28--1047-24964N-180B-GST	mappable	0.250463
216029	12	54030001	54040000	0.0232844	1	0	1047-24274-180B-28--1047-24964N-180B-GST	CN unmappable	0.305184
220349	12	97230001	97240000	0.00815143	0	1	1047-24274-180B-28--1047-24964N-180B-GST	junction unmappable	0.180571
222281	12	116550001	116560000	0.0178418	1	0	1047-24274-180B-28--1047-24964N-180B-GST	CN unmappable	0.267147
245297	14	97680001	97690000	0.00830715	0	1	1047-24274-180B-28--1047-24964N-180B-GST	junction unmappable	0.182287
255941	15	96770001	96780000	0.0128538	0	1	1047-24274-180B-28--1047-24964N-180B-GST	junction unmappable	0.226749
261717	16	51990001	52000000	0.0054197	0	0	1047-24274-180B-28--1047-24964N-180B-GST	mappable	0.147237
308801	21	40340001	40350000	0.0175089	0	1	1047-24274-180B-28--1047-24964N-180B-GST	junction unmappable	0.264642
150343	X	110590001	110600000	0.00828847	0	1	1047-24274-180B-28--1047-24964N-180B-GST	junction unmappable	0.182082
8236	1	82350001	82360000	0.00274108	0	1	A124	junction unmappable	0.104711
22803	1	228020001	228030000	0.00459836	1	0	A124	CN unmappable	0.135622
39293	2	143660001	143670000	0.0210145	0	1	A124	junction unmappable	0.289928
73743	4	46930001	46940000	0.00816081	0	1	A124	junction unmappable	0.180674
85419	4	163690001	163700000	0.0131224	0	0	A124	mappable	0.229106
89070	5	9040001	9050000	0.00836447	0	1	A124	junction unmappable	0.182915
100916	5	127500001	127510000	0.00951668	0	1	A124	junction unmappable	0.195107
101993	5	138270001	138280000	0.00950336	0	1	A124	junction unmappable	0.19497
114950	6	86920001	86930000	0.0160875	1	0	A124	CN unmappable	0.253673
128085	7	47150001	47160000	0.0137883	1	0	A124	CN unmappable	0.234847
128916	7	55460001	55470000	0.0104197	1	0	A124	CN unmappable	0.204154
180583	9	111340001	111350000	0.0057004	0	1	A124	junction unmappable	0.151002
201112	11	39870001	39880000	0.0232115	1	0	A124	CN unmappable	0.304707
211835	12	12090001	12100000	0.0263682	1	0	A124	CN unmappable	0.324766
228290	13	42780001	42790000	0.00665189	1	0	A124	CN unmappable	0.163118
229045	13	50330001	50340000	0.0107657	0	1	A124	junction unmappable	0.207516
239032	14	35030001	35040000	0.10518	1	0	A124	CN unmappable	0.64863
263358	16	68400001	68410000	0.00518999	0	1	A124	junction unmappable	0.144083
282131	20	6490001	6500000	0.0106048	0	1	A124	junction unmappable	0.20596
305807	21	10400001	10410000	0.00120245	1	0	A124	CN unmappable	0.0693527
8103	1	81020001	81030000	0.00878644	0	0	A5NK	mappable	0.187472
22002	1	220010001	220020000	0.0204426	1	0	A5NK	CN unmappable	0.285955
27539	2	26120001	26130000	0.00640806	1	0	A5NK	CN unmappable	0.160101
31572	2	66450001	66460000	0.00439786	0	0	A5NK	mappable	0.132633
37201	2	122740001	122750000	0.0219502	0	1	A5NK	junction unmappable	0.296312
38652	2	137250001	137260000	0.0184871	0	1	A5NK	junction unmappable	0.271934
52092	3	28450001	28460000	78.5601	1	0	A5NK	CN unmappable	17.7268
55389	3	61420001	61430000	0.0154043	1	0	A5NK	CN unmappable	0.248228
78675	4	96250001	96260000	0.00932661	1	0	A5NK	CN unmappable	0.193149
100818	5	126520001	126530000	0.00378372	0	1	A5NK	junction unmappable	0.123024
101325	5	131590001	131600000	0.0111738	0	0	A5NK	mappable	0.211412
130612	7	72420001	72430000	6.82762	1	0	A5NK	CN unmappable	5.22594
170526	9	10770001	10780000	0.00442516	0	1	A5NK	junction unmappable	0.133044
210694	12	680001	690000	0.0269354	0	1	A5NK	junction unmappable	0.32824
218036	12	74100001	74110000	0.0126939	1	0	A5NK	CN unmappable	0.225335
246224	14	106950001	106960000	0.0129597	1	0	A5NK	CN unmappable	0.227681
250610	15	43460001	43470000	0.0196776	0	1	A5NK	junction unmappable	0.280554
267470	17	19160001	19170000	0.0134916	0	1	A5NK	junction unmappable	0.232307
277018	18	33440001	33450000	0.0134042	1	0	A5NK	CN unmappable	0.231553
281281	18	76070001	76080000	0.00533677	0	1	A5NK	junction unmappable	0.146106
287760	20	62780001	62790000	0.0136673	1	0	A5NK	CN unmappable	0.233815
308753	21	39860001	39870000	0.0188194	0	0	A5NK	mappable	0.274368
140081	X	7970001	7980000	0.0124209	0	1	A5NK	junction unmappable	0.222898
144376	X	50920001	50930000	0.0082359	0	1	A5NK	junction unmappable	0.181504
146104	X	68200001	68210000	0.00847796	0	0	A5NK	mappable	0.184152
11887	1	118860001	118870000	0.0511597	1	0	MELA_0013	CN unmappable	0.45237
43783	2	188560001	188570000	0.00573646	0	1	MELA_0013	junction unmappable	0.151479
47210	2	222830001	222840000	0.0141229	0	1	MELA_0013	junction unmappable	0.23768
74827	4	57770001	57780000	0.0110193	1	0	MELA_0013	CN unmappable	0.209946
83725	4	146750001	146760000	0.0215104	1	0	MELA_0013	CN unmappable	0.293329
87143	4	180930001	180940000	0.0100278	0	1	MELA_0013	junction unmappable	0.200278
101186	5	130200001	130210000	0.00641537	1	0	MELA_0013	CN unmappable	0.160192
121261	6	150030001	150040000	0.00961441	0	1	MELA_0013	junction unmappable	0.196106
160955	8	61430001	61440000	0.040487	0	1	MELA_0013	junction unmappable	0.402427
162757	8	79450001	79460000	0.00732572	0	1	MELA_0013	junction unmappable	0.171181
188654	10	50830001	50840000	5.84009	0	0	MELA_0013	mappable	4.83326
189494	10	59230001	59240000	0.322926	1	0	MELA_0013	CN unmappable	1.13653
191221	10	76500001	76510000	0.013381	0	1	MELA_0013	junction unmappable	0.231352
197707	11	5820001	5830000	0.00910114	0	1	MELA_0013	junction unmappable	0.1908
203664	11	65390001	65400000	0.0150552	0	1	MELA_0013	junction unmappable	0.2454
210803	12	1770001	1780000	0.0100963	1	0	MELA_0013	CN unmappable	0.20096
245743	14	102140001	102150000	0.0215147	1	0	MELA_0013	CN unmappable	0.293358
277139	18	34650001	34660000	0.0299857	1	0	MELA_0013	CN unmappable	0.346328
278310	18	46360001	46370000	0.0136586	0	0	MELA_0013	mappable	0.23374
301949	22	23130001	23140000	0.0036931	0	1	MELA_0013	junction unmappable	0.121542
1355	1	13540001	13550000	41.1949	1	0	222-24370-179T-30--222-25062N-179T-BLD	CN unmappable	12.8366
6635	1	66340001	66350000	0.0178314	1	0	222-24370-179T-30--222-25062N-179T-BLD	CN unmappable	0.267069
18175	1	181740001	181750000	0.0141513	0	0	222-24370-179T-30--222-25062N-179T-BLD	mappable	0.237918
24314	1	243130001	243140000	0.00902525	1	0	222-24370-179T-30--222-25062N-179T-BLD	CN unmappable	0.190003
38187	2	132600001	132610000	0.00871872	0	1	222-24370-179T-30--222-25062N-179T-BLD	junction unmappable	0.186748
46099	2	211720001	211730000	0.00961901	0	0	222-24370-179T-30--222-25062N-179T-BLD	mappable	0.196153
77342	4	82920001	82930000	0.056004	1	0	222-24370-179T-30--222-25062N-179T-BLD	CN unmappable	0.473303
80078	4	110280001	110290000	0.00747968	0	1	222-24370-179T-30--222-25062N-179T-BLD	junction unmappable	0.17297
101413	5	132470001	132480000	0.0195196	1	0	222-24370-179T-30--222-25062N-179T-BLD	CN unmappable	0.279425
116764	6	105060001	105070000	0.0140915	0	1	222-24370-179T-30--222-25062N-179T-BLD	junction unmappable	0.237415
169144	8	143320001	143330000	0.0346481	0	1	222-24370-179T-30--222-25062N-179T-BLD	junction unmappable	0.37228
169176	8	143640001	143650000	0.0109514	0	1	222-24370-179T-30--222-25062N-179T-BLD	junction unmappable	0.209298
188978	10	54070001	54080000	0.0141823	0	1	222-24370-179T-30--222-25062N-179T-BLD	junction unmappable	0.238179
189633	10	60620001	60630000	0.0124943	1	0	222-24370-179T-30--222-25062N-179T-BLD	CN unmappable	0.223556
195992	10	124210001	124220000	0.0109003	0	1	222-24370-179T-30--222-25062N-179T-BLD	junction unmappable	0.208809
217142	12	65160001	65170000	0.00513744	0	1	222-24370-179T-30--222-25062N-179T-BLD	junction unmappable	0.143352
261993	16	54750001	54760000	0.0124092	0	1	222-24370-179T-30--222-25062N-179T-BLD	junction unmappable	0.222793
276903	18	32290001	32300000	0.00283682	1	0	222-24370-179T-30--222-25062N-179T-BLD	CN unmappable	0.106524
293739	19	160001	170000	14.5179	1	0	222-24370-179T-30--222-25062N-179T-BLD	CN unmappable	7.62046
306637	21	18700001	18710000	0.0175941	1	0	222-24370-179T-30--222-25062N-179T-BLD	CN unmappable	0.265286
144800	X	55160001	55170000	0.00896804	0	1	222-24370-179T-30--222-25062N-179T-BLD	junction unmappable	0.189399
20649	1	206480001	206490000	0.136644	1	0	611-24559-125X-30--611-25077N-118V-BLD	CN unmappable	0.739307
39998	2	150710001	150720000	0.00762108	1	0	611-24559-125X-30--611-25077N-118V-BLD	CN unmappable	0.174598
41464	2	165370001	165380000	0.00482543	0	1	611-24559-125X-30--611-25077N-118V-BLD	junction unmappable	0.138931
46827	2	219000001	219010000	0.0139844	0	1	611-24559-125X-30--611-25077N-118V-BLD	junction unmappable	0.236511
59971	3	107240001	107250000	0.00977714	0	1	611-24559-125X-30--611-25077N-118V-BLD	junction unmappable	0.197759
64242	3	149950001	149960000	0.00969258	0	1	611-24559-125X-30--611-25077N-118V-BLD	junction unmappable	0.196902
65941	3	166940001	166950000	0.0147834	0	1	611-24559-125X-30--611-25077N-118V-BLD	junction unmappable	0.243174
81828	4	127780001	127790000	0.0185254	1	0	611-24559-125X-30--611-25077N-118V-BLD	CN unmappable	0.272216
99551	5	113850001	113860000	0.0155896	0	1	611-24559-125X-30--611-25077N-118V-BLD	junction unmappable	0.249717
100701	5	125350001	125360000	0.0095757	0	1	611-24559-125X-30--611-25077N-118V-BLD	junction unmappable	0.195711
104209	5	160430001	160440000	0.00581741	1	0	611-24559-125X-30--611-25077N-118V-BLD	CN unmappable	0.152544
123462	7	920001	930000	0.00776899	1	0	611-24559-125X-30--611-25077N-118V-BLD	CN unmappable	0.176284
156193	8	13810001	13820000	0.00744786	1	0	611-24559-125X-30--611-25077N-118V-BLD	CN unmappable	0.172602
158746	8	39340001	39350000	0.0539567	1	0	611-24559-125X-30--611-25077N-118V-BLD	CN unmappable	0.464572
171729	9	22800001	22810000	0.0044666	0	0	611-24559-125X-30--611-25077N-118V-BLD	mappable	0.133665
178337	9	88880001	88890000	0.027803	1	0	611-24559-125X-30--611-25077N-118V-BLD	CN unmappable	0.333485
199115	11	19900001	19910000	0.0245523	0	1	611-24559-125X-30--611-25077N-118V-BLD	junction unmappable	0.313384
228880	13	48680001	48690000	0.00825787	1	0	611-24559-125X-30--611-25077N-118V-BLD	CN unmappable	0.181746
259905	16	33870001	33880000	0.041012	1	0	611-24559-125X-30--611-25077N-118V-BLD	CN unmappable	0.405028
282742	20	12600001	12610000	0.0145629	0	1	611-24559-125X-30--611-25077N-118V-BLD	junction unmappable	0.241354
304439	22	48030001	48040000	0.0132966	0	1	611-24559-125X-30--611-25077N-118V-BLD	junction unmappable	0.230622
150335	X	110510001	110520000	0.0131021	0	0	611-24559-125X-30--611-25077N-118V-BLD	mappable	0.228929
30888	2	59610001	59620000	0.013888	0	1	493bf7322b8c18365466c43bf7a9e119bd4d7782147f9bc368bf4909539c43de	junction unmappable	0.235694
36001	2	110740001	110750000	10.4694	1	0	493bf7322b8c18365466c43bf7a9e119bd4d7782147f9bc368bf4909539c43de	CN unmappable	6.47129
50531	3	12840001	12850000	0.0155519	0	1	493bf7322b8c18365466c43bf7a9e119bd4d7782147f9bc368bf4909539c43de	junction unmappable	0.249415
56748	3	75010001	75020000	0.0207498	1	0	493bf7322b8c18365466c43bf7a9e119bd4d7782147f9bc368bf4909539c43de	CN unmappable	0.288096
58165	3	89180001	89190000	0.011642	0	1	493bf7322b8c18365466c43bf7a9e119bd4d7782147f9bc368bf4909539c43de	junction unmappable	0.215796
61802	3	125550001	125560000	0.0151983	0	1	493bf7322b8c18365466c43bf7a9e119bd4d7782147f9bc368bf4909539c43de	junction unmappable	0.246563
75354	4	63040001	63050000	0.011663	0	1	493bf7322b8c18365466c43bf7a9e119bd4d7782147f9bc368bf4909539c43de	junction unmappable	0.215991
80806	4	117560001	117570000	0.00470315	0	1	493bf7322b8c18365466c43bf7a9e119bd4d7782147f9bc368bf4909539c43de	junction unmappable	0.137159
99360	5	111940001	111950000	0.0232726	0	1	493bf7322b8c18365466c43bf7a9e119bd4d7782147f9bc368bf4909539c43de	junction unmappable	0.305107
126821	7	34510001	34520000	0.00984519	0	0	493bf7322b8c18365466c43bf7a9e119bd4d7782147f9bc368bf4909539c43de	mappable	0.198446
156015	8	12030001	12040000	89.6645	1	0	493bf7322b8c18365466c43bf7a9e119bd4d7782147f9bc368bf4909539c43de	CN unmappable	18.9383
168289	8	134770001	134780000	0.0245531	1	0	493bf7322b8c18365466c43bf7a9e119bd4d7782147f9bc368bf4909539c43de	CN unmappable	0.313388
183637	10	660001	670000	0.00497131	1	0	493bf7322b8c18365466c43bf7a9e119bd4d7782147f9bc368bf4909539c43de	CN unmappable	0.141015
206168	11	90430001	90440000	0.00927748	0	1	493bf7322b8c18365466c43bf7a9e119bd4d7782147f9bc368bf4909539c43de	junction unmappable	0.192639
207365	11	102400001	102410000	0.00692573	0	1	493bf7322b8c18365466c43bf7a9e119bd4d7782147f9bc368bf4909539c43de	junction unmappable	0.166442
208567	11	114420001	114430000	0.0267201	1	0	493bf7322b8c18365466c43bf7a9e119bd4d7782147f9bc368bf4909539c43de	CN unmappable	0.326925
217588	12	69620001	69630000	0.617611	1	0	493bf7322b8c18365466c43bf7a9e119bd4d7782147f9bc368bf4909539c43de	CN unmappable	1.57176
228936	13	49240001	49250000	0.00508147	0	1	493bf7322b8c18365466c43bf7a9e119bd4d7782147f9bc368bf4909539c43de	junction unmappable	0.142569
248365	15	21010001	21020000	56.2156	1	0	493bf7322b8c18365466c43bf7a9e119bd4d7782147f9bc368bf4909539c43de	CN unmappable	14.9954
267464	17	19100001	19110000	2.46744	1	0	493bf7322b8c18365466c43bf7a9e119bd4d7782147f9bc368bf4909539c43de	CN unmappable	3.14162
297838	19	41150001	41160000	0.124352	1	0	493bf7322b8c18365466c43bf7a9e119bd4d7782147f9bc368bf4909539c43de	CN unmappable	0.705272
301610	22	19740001	19750000	0.798007	0	0	493bf7322b8c18365466c43bf7a9e119bd4d7782147f9bc368bf4909539c43de	mappable	1.78662
20725	1	207240001	207250000	0.0102181	0	1	CA-0224	junction unmappable	0.20217
21234	1	212330001	212340000	0.0111689	0	1	CA-0224	junction unmappable	0.211366
25544	2	6170001	6180000	0.0105108	0	0	CA-0224	mappable	0.205044
35296	2	103690001	103700000	0.0135702	0	1	CA-0224	junction unmappable	0.232982
40945	2	160180001	160190000	0.00437688	1	0	CA-0224	CN unmappable	0.132316
70946	4	18960001	18970000	0.0142734	1	0	CA-0224	CN unmappable	0.238942
73813	4	47630001	47640000	0.00759352	0	1	CA-0224	junction unmappable	0.174282
99312	5	111460001	111470000	0.00697687	1	0	CA-0224	CN unmappable	0.167055
101198	5	130320001	130330000	0.0187293	0	1	CA-0224	junction unmappable	0.27371
124676	7	13060001	13070000	0.00532756	0	1	CA-0224	junction unmappable	0.14598
131756	7	83860001	83870000	0.0141204	0	1	CA-0224	junction unmappable	0.237658
155576	8	7640001	7650000	47.4448	1	0	CA-0224	CN unmappable	13.776
183979	10	4080001	4090000	0.0118413	0	1	CA-0224	junction unmappable	0.217635
205858	11	87330001	87340000	0.00855043	1	0	CA-0224	CN unmappable	0.184937
222496	12	118700001	118710000	0.00912787	0	1	CA-0224	junction unmappable	0.19108
238362	14	28330001	28340000	0.0135217	1	0	CA-0224	CN unmappable	0.232566
259755	16	32370001	32380000	0.00492712	1	0	CA-0224	CN unmappable	0.140387
267607	17	20530001	20540000	0.0161594	1	0	CA-0224	CN unmappable	0.254239
271450	17	58960001	58970000	0.0290961	1	0	CA-0224	CN unmappable	0.341151
299101	19	53780001	53790000	0.00605524	1	0	CA-0224	CN unmappable	0.155631
306979	21	22120001	22130000	0.0144655	0	1	CA-0224	junction unmappable	0.240546
6696	1	66950001	66960000	0.00866288	1	0	42-24283-147M-34--42-24954N-53L-GST	CN unmappable	0.186149
52043	3	27960001	27970000	0.0168123	0	1	42-24283-147M-34--42-24954N-53L-GST	junction unmappable	0.259325
52287	3	30400001	30410000	0.0100914	1	0	42-24283-147M-34--42-24954N-53L-GST	CN unmappable	0.200912
53617	3	43700001	43710000	0.0134336	0	1	42-24283-147M-34--42-24954N-53L-GST	junction unmappable	0.231807
77258	4	82080001	82090000	0.0124098	1	0	42-24283-147M-34--42-24954N-53L-GST	CN unmappable	0.222798
111978	6	57200001	57210000	0.0105892	1	0	42-24283-147M-34--42-24954N-53L-GST	CN unmappable	0.205807
113719	6	74610001	74620000	0.0190583	1	0	42-24283-147M-34--42-24954N-53L-GST	CN unmappable	0.276104
123343	6	170850001	170860000	0.00682101	0	1	42-24283-147M-34--42-24954N-53L-GST	junction unmappable	0.165179
155615	8	8030001	8040000	480.821	1	0	42-24283-147M-34--42-24954N-53L-GST	CN unmappable	43.8553
156514	8	17020001	17030000	0.00394677	0	1	42-24283-147M-34--42-24954N-53L-GST	junction unmappable	0.125647
183788	10	2170001	2180000	0.00988457	0	1	42-24283-147M-34--42-24954N-53L-GST	junction unmappable	0.198842
195793	10	122220001	122230000	1.07811	1	0	42-24283-147M-34--42-24954N-53L-GST	CN unmappable	2.07664
209306	11	121810001	121820000	0.0163938	0	1	42-24283-147M-34--42-24954N-53L-GST	junction unmappable	0.256077
210603	11	134780001	134790000	0.0102375	0	0	42-24283-147M-34--42-24954N-53L-GST	mappable	0.202361
210890	12	2640001	2650000	0.00688998	1	0	42-24283-147M-34--42-24954N-53L-GST	CN unmappable	0.166012
220958	12	103320001	103330000	0.00970662	0	1	42-24283-147M-34--42-24954N-53L-GST	junction unmappable	0.197044
228193	13	41810001	41820000	0.0134395	0	1	42-24283-147M-34--42-24954N-53L-GST	junction unmappable	0.231857
259272	16	27540001	27550000	0.0148687	0	1	42-24283-147M-34--42-24954N-53L-GST	junction unmappable	0.243874
282949	20	14670001	14680000	0.0126771	0	1	42-24283-147M-34--42-24954N-53L-GST	junction unmappable	0.225185
152070	X	127860001	127870000	0.0232363	1	0	42-24283-147M-34--42-24954N-53L-GST	CN unmappable	0.304869
26389	2	14620001	14630000	0.00849881	1	0	3d2fee3d76b8059823c9262d59d1842189785bf37241b8df5c12f8a261598e35	CN unmappable	0.184378
43511	2	185840001	185850000	0.0157967	1	0	3d2fee3d76b8059823c9262d59d1842189785bf37241b8df5c12f8a261598e35	CN unmappable	0.25137
56801	3	75540001	75550000	0.0119124	0	1	3d2fee3d76b8059823c9262d59d1842189785bf37241b8df5c12f8a261598e35	junction unmappable	0.218288
68822	3	195750001	195760000	0.0115486	0	1	3d2fee3d76b8059823c9262d59d1842189785bf37241b8df5c12f8a261598e35	junction unmappable	0.214929
70360	4	13100001	13110000	0.00805452	0	1	3d2fee3d76b8059823c9262d59d1842189785bf37241b8df5c12f8a261598e35	junction unmappable	0.179494
93282	5	51160001	51170000	0.0139603	0	1	3d2fee3d76b8059823c9262d59d1842189785bf37241b8df5c12f8a261598e35	junction unmappable	0.236308
120182	6	139240001	139250000	0.00914636	0	1	3d2fee3d76b8059823c9262d59d1842189785bf37241b8df5c12f8a261598e35	junction unmappable	0.191273
130509	7	71390001	71400000	0.0130618	0	1	3d2fee3d76b8059823c9262d59d1842189785bf37241b8df5c12f8a261598e35	junction unmappable	0.228576
133593	7	102230001	102240000	60.0936	1	0	3d2fee3d76b8059823c9262d59d1842189785bf37241b8df5c12f8a261598e35	CN unmappable	15.504
160189	8	53770001	53780000	0.0124787	0	1	3d2fee3d76b8059823c9262d59d1842189785bf37241b8df5c12f8a261598e35	junction unmappable	0.223416
171720	9	22710001	22720000	0.0104171	0	1	3d2fee3d76b8059823c9262d59d1842189785bf37241b8df5c12f8a261598e35	junction unmappable	0.204128
183224	9	137750001	137760000	0.0210691	1	0	3d2fee3d76b8059823c9262d59d1842189785bf37241b8df5c12f8a261598e35	CN unmappable	0.290304
184697	10	11260001	11270000	0.00987763	0	0	3d2fee3d76b8059823c9262d59d1842189785bf37241b8df5c12f8a261598e35	mappable	0.198773
192896	10	93250001	93260000	0.0117493	0	1	3d2fee3d76b8059823c9262d59d1842189785bf37241b8df5c12f8a261598e35	junction unmappable	0.216788
213254	12	26280001	26290000	0.00811559	0	0	3d2fee3d76b8059823c9262d59d1842189785bf37241b8df5c12f8a261598e35	mappable	0.180173
219899	12	92730001	92740000	0.00579964	1	0	3d2fee3d76b8059823c9262d59d1842189785bf37241b8df5c12f8a261598e35	CN unmappable	0.152311
248701	15	24370001	24380000	0.0959321	1	0	3d2fee3d76b8059823c9262d59d1842189785bf37241b8df5c12f8a261598e35	CN unmappable	0.619458
258567	16	20490001	20500000	0.0163301	1	0	3d2fee3d76b8059823c9262d59d1842189785bf37241b8df5c12f8a261598e35	CN unmappable	0.255578
259466	16	29480001	29490000	727.52	1	0	3d2fee3d76b8059823c9262d59d1842189785bf37241b8df5c12f8a261598e35	CN unmappable	53.9452
282816	20	13340001	13350000	0.00868493	0	1	3d2fee3d76b8059823c9262d59d1842189785bf37241b8df5c12f8a261598e35	junction unmappable	0.186386
301784	22	21480001	21490000	349.204	1	0	3d2fee3d76b8059823c9262d59d1842189785bf37241b8df5c12f8a261598e35	CN unmappable	37.374
14856	1	148550001	148560000	0.00981914	1	0	A2C9	CN unmappable	0.198183
28398	2	34710001	34720000	0.0124185	1	0	A2C9	CN unmappable	0.222876
97118	5	89520001	89530000	0.00445517	0	0	A2C9	mappable	0.133494
99236	5	110700001	110710000	0.00614925	0	1	A2C9	junction unmappable	0.156834
125954	7	25840001	25850000	0.0208781	0	1	A2C9	junction unmappable	0.288985
131632	7	82620001	82630000	0.00934673	1	0	A2C9	CN unmappable	0.193357
169165	8	143530001	143540000	0.0131318	0	0	A2C9	mappable	0.229188
173933	9	44840001	44850000	0.0143068	1	0	A2C9	CN unmappable	0.239222
188022	10	44510001	44520000	0.00760886	0	0	A2C9	mappable	0.174458
188707	10	51360001	51370000	58.0462	1	0	A2C9	CN unmappable	15.2376
203711	11	65860001	65870000	0.0137616	1	0	A2C9	CN unmappable	0.23462
206151	11	90260001	90270000	0.0129942	0	1	A2C9	junction unmappable	0.227985
207981	11	108560001	108570000	0.00976732	0	1	A2C9	junction unmappable	0.197659
215166	12	45400001	45410000	0.00914845	0	1	A2C9	junction unmappable	0.191295
234015	13	100030001	100040000	0.00231132	0	1	A2C9	junction unmappable	0.0961524
234291	13	102790001	102800000	0.0698499	1	0	A2C9	CN unmappable	0.528583
244409	14	88800001	88810000	0.018426	0	1	A2C9	junction unmappable	0.271485
262001	16	54830001	54840000	0.0102262	0	1	A2C9	junction unmappable	0.202249
267053	17	14990001	15000000	0.0184047	0	1	A2C9	junction unmappable	0.271328
275612	18	19380001	19390000	0.00697839	0	1	A2C9	junction unmappable	0.167073
7392	1	73910001	73920000	0.0288345	1	0	A3A8	CN unmappable	0.339615
16094	1	160930001	160940000	0.0207616	0	1	A3A8	junction unmappable	0.288178
30922	2	59950001	59960000	0.0090648	0	0	A3A8	mappable	0.190418
43148	2	182210001	182220000	0.0219528	1	0	A3A8	CN unmappable	0.29633
51170	3	19230001	19240000	0.00927803	0	1	A3A8	junction unmappable	0.192645
58257	3	90100001	90110000	0.00363532	0	1	A3A8	junction unmappable	0.120587
62456	3	132090001	132100000	0.00825867	1	0	A3A8	CN unmappable	0.181754
73976	4	49260001	49270000	0.00857921	1	0	A3A8	CN unmappable	0.185248
74450	4	54000001	54010000	0.00564469	1	0	A3A8	CN unmappable	0.150262
94612	5	64460001	64470000	0.318494	1	0	A3A8	CN unmappable	1.1287
116560	6	103020001	103030000	0.00939686	0	1	A3A8	junction unmappable	0.193875
121629	6	153710001	153720000	0.0187258	1	0	A3A8	CN unmappable	0.273685
159838	8	50260001	50270000	0.0073755	0	0	A3A8	mappable	0.171761
167902	8	130900001	130910000	0.0142621	0	1	A3A8	junction unmappable	0.238848
181126	9	116770001	116780000	0.00976938	0	1	A3A8	junction unmappable	0.19768
189517	10	59460001	59470000	0.011599	1	0	A3A8	CN unmappable	0.215398
210462	11	133370001	133380000	0.00683896	0	1	A3A8	junction unmappable	0.165396
230945	13	69330001	69340000	0.0177411	0	1	A3A8	junction unmappable	0.266392
240366	14	48370001	48380000	0.00994573	1	0	A3A8	CN unmappable	0.199457
249447	15	31830001	31840000	0.0109707	0	0	A3A8	mappable	0.209483
264769	16	82510001	82520000	0.00720845	0	1	A3A8	junction unmappable	0.169805
271737	17	61830001	61840000	0.00670969	0	1	A3A8	junction unmappable	0.163825
298362	19	46390001	46400000	0.00947001	1	0	A3A8	CN unmappable	0.194628
7829	1	78280001	78290000	0.00835609	0	1	7848bd725874b4f28f5c907834fab039f1c9489938a6d78b770e367be2973da9	junction unmappable	0.182823
34155	2	92280001	92290000	0.0140824	1	0	7848bd725874b4f28f5c907834fab039f1c9489938a6d78b770e367be2973da9	CN unmappable	0.237338
46245	2	213180001	213190000	0.0214764	0	0	7848bd725874b4f28f5c907834fab039f1c9489938a6d78b770e367be2973da9	mappable	0.293096
48904	2	239770001	239780000	0.0774074	1	0	7848bd725874b4f28f5c907834fab039f1c9489938a6d78b770e367be2973da9	CN unmappable	0.556444
59009	3	97620001	97630000	0.0288375	1	0	7848bd725874b4f28f5c907834fab039f1c9489938a6d78b770e367be2973da9	CN unmappable	0.339632
88804	5	6380001	6390000	0.00472383	0	1	7848bd725874b4f28f5c907834fab039f1c9489938a6d78b770e367be2973da9	junction unmappable	0.13746
98469	5	103030001	103040000	0.015292	1	0	7848bd725874b4f28f5c907834fab039f1c9489938a6d78b770e367be2973da9	CN unmappable	0.247322
101629	5	134630001	134640000	0.0194692	0	1	7848bd725874b4f28f5c907834fab039f1c9489938a6d78b770e367be2973da9	junction unmappable	0.279064
118530	6	122720001	122730000	0.0156908	0	1	7848bd725874b4f28f5c907834fab039f1c9489938a6d78b770e367be2973da9	junction unmappable	0.250526
124812	7	14420001	14430000	0.0169307	0	1	7848bd725874b4f28f5c907834fab039f1c9489938a6d78b770e367be2973da9	junction unmappable	0.260236
130864	7	74940001	74950000	9.70089	1	0	7848bd725874b4f28f5c907834fab039f1c9489938a6d78b770e367be2973da9	CN unmappable	6.22925
173516	9	40670001	40680000	2.34562	1	0	7848bd725874b4f28f5c907834fab039f1c9489938a6d78b770e367be2973da9	CN unmappable	3.06308
181981	9	125320001	125330000	0.00965999	0	1	7848bd725874b4f28f5c907834fab039f1c9489938a6d78b770e367be2973da9	junction unmappable	0.196571
203847	11	67220001	67230000	0.00616438	0	1	7848bd725874b4f28f5c907834fab039f1c9489938a6d78b770e367be2973da9	junction unmappable	0.157027
228101	13	40890001	40900000	0.0157143	0	1	7848bd725874b4f28f5c907834fab039f1c9489938a6d78b770e367be2973da9	junction unmappable	0.250713
256510	15	102460001	102470000	0.155888	1	0	7848bd725874b4f28f5c907834fab039f1c9489938a6d78b770e367be2973da9	CN unmappable	0.789654
279782	18	61080001	61090000	0.0154653	0	1	7848bd725874b4f28f5c907834fab039f1c9489938a6d78b770e367be2973da9	junction unmappable	0.248719
295338	19	16150001	16160000	0.011955	0	1	7848bd725874b4f28f5c907834fab039f1c9489938a6d78b770e367be2973da9	junction unmappable	0.218677
302178	22	25420001	25430000	46.6865	1	0	7848bd725874b4f28f5c907834fab039f1c9489938a6d78b770e367be2973da9	CN unmappable	13.6655
77	1	760001	770000	0.0135832	1	0	5625	CN unmappable	0.233094
226	1	2250001	2260000	0.0176842	0	1	5625	junction unmappable	0.265964
10904	1	109030001	109040000	0.0148015	1	0	5625	CN unmappable	0.243323
27293	2	23660001	23670000	0.0094936	1	0	5625	CN unmappable	0.19487
30865	2	59380001	59390000	0.012544	1	0	5625	CN unmappable	0.224
39640	2	147130001	147140000	0.0071971	0	1	5625	junction unmappable	0.169671
52306	3	30590001	30600000	0.0130114	0	1	5625	junction unmappable	0.228135
52876	3	36290001	36300000	0.0115053	0	1	5625	junction unmappable	0.214525
68817	3	195700001	195710000	0.135962	1	0	5625	CN unmappable	0.73746
69081	4	310001	320000	0.0258022	1	0	5625	CN unmappable	0.321261
71499	4	24490001	24500000	0.00324567	0	1	5625	junction unmappable	0.113942
94382	5	62160001	62170000	0.0244117	1	0	5625	CN unmappable	0.312485
125098	7	17280001	17290000	0.00575258	0	1	5625	junction unmappable	0.151692
128813	7	54430001	54440000	0.0149382	0	0	5625	mappable	0.244444
161220	8	64080001	64090000	0.010281	0	1	5625	junction unmappable	0.20279
173678	9	42290001	42300000	5.57427	1	0	5625	CN unmappable	4.72198
207957	11	108320001	108330000	0.0121653	0	1	5625	junction unmappable	0.220593
216968	12	63420001	63430000	0.00507144	0	1	5625	junction unmappable	0.142428
243525	14	79960001	79970000	0.00194794	0	1	5625	junction unmappable	0.088271
249553	15	32890001	32900000	14.659	1	0	5625	CN unmappable	7.65743
151323	X	120390001	120400000	1.93197	1	0	5625	CN unmappable	2.77991
4636	1	46350001	46360000	0.00823223	0	1	e4831d0fe318c0dfe320eb9be0148336ad1a096e5a3f8675fe517ec2b5d82de6	junction unmappable	0.181463
5226	1	52250001	52260000	0.00616127	0	1	e4831d0fe318c0dfe320eb9be0148336ad1a096e5a3f8675fe517ec2b5d82de6	junction unmappable	0.156987
33011	2	80840001	80850000	0.00211569	0	0	e4831d0fe318c0dfe320eb9be0148336ad1a096e5a3f8675fe517ec2b5d82de6	mappable	0.0919932
34767	2	98400001	98410000	0.00830764	0	0	e4831d0fe318c0dfe320eb9be0148336ad1a096e5a3f8675fe517ec2b5d82de6	mappable	0.182293
54323	3	50760001	50770000	0.0153742	1	0	e4831d0fe318c0dfe320eb9be0148336ad1a096e5a3f8675fe517ec2b5d82de6	CN unmappable	0.247986
55271	3	60240001	60250000	0.0130961	0	1	e4831d0fe318c0dfe320eb9be0148336ad1a096e5a3f8675fe517ec2b5d82de6	junction unmappable	0.228876
59673	3	104260001	104270000	0.00826623	0	1	e4831d0fe318c0dfe320eb9be0148336ad1a096e5a3f8675fe517ec2b5d82de6	junction unmappable	0.181838
69359	4	3090001	3100000	0.00567906	1	0	e4831d0fe318c0dfe320eb9be0148336ad1a096e5a3f8675fe517ec2b5d82de6	CN unmappable	0.150719
73632	4	45820001	45830000	0.013238	1	0	e4831d0fe318c0dfe320eb9be0148336ad1a096e5a3f8675fe517ec2b5d82de6	CN unmappable	0.230113
81768	4	127180001	127190000	0.00693545	0	0	e4831d0fe318c0dfe320eb9be0148336ad1a096e5a3f8675fe517ec2b5d82de6	mappable	0.166559
101919	5	137530001	137540000	0.0106818	1	0	e4831d0fe318c0dfe320eb9be0148336ad1a096e5a3f8675fe517ec2b5d82de6	CN unmappable	0.206706
105914	5	177480001	177490000	0.0217532	1	0	e4831d0fe318c0dfe320eb9be0148336ad1a096e5a3f8675fe517ec2b5d82de6	CN unmappable	0.294979
163781	8	89690001	89700000	0.014909	1	0	e4831d0fe318c0dfe320eb9be0148336ad1a096e5a3f8675fe517ec2b5d82de6	CN unmappable	0.244205
163784	8	89720001	89730000	0.00484486	0	0	e4831d0fe318c0dfe320eb9be0148336ad1a096e5a3f8675fe517ec2b5d82de6	mappable	0.13921
168338	8	135260001	135270000	0.00857413	0	1	e4831d0fe318c0dfe320eb9be0148336ad1a096e5a3f8675fe517ec2b5d82de6	junction unmappable	0.185193
180218	9	107690001	107700000	0.0117743	0	1	e4831d0fe318c0dfe320eb9be0148336ad1a096e5a3f8675fe517ec2b5d82de6	junction unmappable	0.217019
203979	11	68540001	68550000	0.01324	0	1	e4831d0fe318c0dfe320eb9be0148336ad1a096e5a3f8675fe517ec2b5d82de6	junction unmappable	0.230131
208301	11	111760001	111770000	0.00802227	0	1	e4831d0fe318c0dfe320eb9be0148336ad1a096e5a3f8675fe517ec2b5d82de6	junction unmappable	0.179134
241223	14	56940001	56950000	0.00893412	1	0	e4831d0fe318c0dfe320eb9be0148336ad1a096e5a3f8675fe517ec2b5d82de6	CN unmappable	0.189041
277935	18	42610001	42620000	0.0247309	1	0	e4831d0fe318c0dfe320eb9be0148336ad1a096e5a3f8675fe517ec2b5d82de6	CN unmappable	0.314521
293777	19	540001	550000	0.0305543	1	0	e4831d0fe318c0dfe320eb9be0148336ad1a096e5a3f8675fe517ec2b5d82de6	CN unmappable	0.349596
308388	21	36210001	36220000	0.00992291	0	1	e4831d0fe318c0dfe320eb9be0148336ad1a096e5a3f8675fe517ec2b5d82de6	junction unmappable	0.199228
144213	X	49290001	49300000	134.861	1	0	e4831d0fe318c0dfe320eb9be0148336ad1a096e5a3f8675fe517ec2b5d82de6	CN unmappable	23.2259
152980	X	136960001	136970000	0.00845274	0	1	e4831d0fe318c0dfe320eb9be0148336ad1a096e5a3f8675fe517ec2b5d82de6	junction unmappable	0.183878
24873	1	248720001	248730000	3.03162	1	0	cd65d105ecaafbe94b32932c5444b28fa23317020bdd82012babdca9266577fd.2	CN unmappable	3.48231
48058	2	231310001	231320000	0.0256931	0	1	cd65d105ecaafbe94b32932c5444b28fa23317020bdd82012babdca9266577fd.2	junction unmappable	0.320581
74549	4	54990001	55000000	0.00434602	0	1	cd65d105ecaafbe94b32932c5444b28fa23317020bdd82012babdca9266577fd.2	junction unmappable	0.131849
84457	4	154070001	154080000	0.0179506	0	1	cd65d105ecaafbe94b32932c5444b28fa23317020bdd82012babdca9266577fd.2	junction unmappable	0.267959
174051	9	46020001	46030000	157.981	1	0	cd65d105ecaafbe94b32932c5444b28fa23317020bdd82012babdca9266577fd.2	CN unmappable	25.1381
179118	9	96690001	96700000	0.0211806	0	1	cd65d105ecaafbe94b32932c5444b28fa23317020bdd82012babdca9266577fd.2	junction unmappable	0.291071
180521	9	110720001	110730000	0.0108054	0	1	cd65d105ecaafbe94b32932c5444b28fa23317020bdd82012babdca9266577fd.2	junction unmappable	0.207899
208723	11	115980001	115990000	0.00853798	0	0	cd65d105ecaafbe94b32932c5444b28fa23317020bdd82012babdca9266577fd.2	mappable	0.184802
211335	12	7090001	7100000	0.0176192	1	0	cd65d105ecaafbe94b32932c5444b28fa23317020bdd82012babdca9266577fd.2	CN unmappable	0.265474
215100	12	44740001	44750000	0.007261	1	0	cd65d105ecaafbe94b32932c5444b28fa23317020bdd82012babdca9266577fd.2	CN unmappable	0.170423
219614	12	89880001	89890000	0.00728066	0	1	cd65d105ecaafbe94b32932c5444b28fa23317020bdd82012babdca9266577fd.2	junction unmappable	0.170654
223487	12	128610001	128620000	0.00576317	0	1	cd65d105ecaafbe94b32932c5444b28fa23317020bdd82012babdca9266577fd.2	junction unmappable	0.151831
255271	15	90070001	90080000	0.0192328	1	0	cd65d105ecaafbe94b32932c5444b28fa23317020bdd82012babdca9266577fd.2	CN unmappable	0.277365
275793	18	21190001	21200000	0.00434691	1	0	cd65d105ecaafbe94b32932c5444b28fa23317020bdd82012babdca9266577fd.2	CN unmappable	0.131862
275903	18	22290001	22300000	0.0144216	1	0	cd65d105ecaafbe94b32932c5444b28fa23317020bdd82012babdca9266577fd.2	CN unmappable	0.24018
276338	18	26640001	26650000	0.0223906	0	0	cd65d105ecaafbe94b32932c5444b28fa23317020bdd82012babdca9266577fd.2	mappable	0.29927
277238	18	35640001	35650000	0.0293365	0	1	cd65d105ecaafbe94b32932c5444b28fa23317020bdd82012babdca9266577fd.2	junction unmappable	0.342558
280672	18	69980001	69990000	0.00736921	0	1	cd65d105ecaafbe94b32932c5444b28fa23317020bdd82012babdca9266577fd.2	junction unmappable	0.171688
301276	22	16400001	16410000	5.71629	1	0	cd65d105ecaafbe94b32932c5444b28fa23317020bdd82012babdca9266577fd.2	CN unmappable	4.78175
302059	22	24230001	24240000	0.010188	0	1	cd65d105ecaafbe94b32932c5444b28fa23317020bdd82012babdca9266577fd.2	junction unmappable	0.201872
304059	22	44230001	44240000	0.0101318	1	0	cd65d105ecaafbe94b32932c5444b28fa23317020bdd82012babdca9266577fd.2	CN unmappable	0.201314
8781	1	87800001	87810000	0.0118223	0	0	1103	mappable	0.217461
14613	1	146120001	146130000	13.7631	1	0	1103	CN unmappable	7.41973
50093	3	8460001	8470000	0.0209767	0	1	1103	junction unmappable	0.289666
95331	5	71650001	71660000	0.00569131	0	1	1103	junction unmappable	0.150882
98813	5	106470001	106480000	0.0167018	0	1	1103	junction unmappable	0.258471
108739	6	24810001	24820000	12.2645	1	0	1103	CN unmappable	7.00413
114158	6	79000001	79010000	0.00465829	1	0	1103	CN unmappable	0.136503
118089	6	118310001	118320000	0.00889374	1	0	1103	CN unmappable	0.188613
126666	7	32960001	32970000	0.00829488	0	1	1103	junction unmappable	0.182152
137131	7	137610001	137620000	0.0262766	1	0	1103	CN unmappable	0.324201
156110	8	12980001	12990000	0.0211124	0	1	1103	junction unmappable	0.290602
162125	8	73130001	73140000	0.0139707	0	1	1103	junction unmappable	0.236395
173961	9	45120001	45130000	22.2178	1	0	1103	CN unmappable	9.42715
176893	9	74440001	74450000	0.0373984	0	1	1103	junction unmappable	0.386773
179828	9	103790001	103800000	0.0185653	0	0	1103	mappable	0.272509
204813	11	76880001	76890000	0.0109129	0	1	1103	junction unmappable	0.208929
256790	16	2720001	2730000	0.0220478	1	0	1103	CN unmappable	0.29697
259764	16	32460001	32470000	0.00599671	1	0	1103	CN unmappable	0.154877
308691	21	39240001	39250000	0.00859357	0	1	1103	junction unmappable	0.185403
145785	X	65010001	65020000	0.0157946	0	1	1103	junction unmappable	0.251353
148493	X	92090001	92100000	0.0118626	1	0	1103	CN unmappable	0.217831
153135	X	138510001	138520000	0.00641857	1	0	1103	CN unmappable	0.160232
21227	1	212260001	212270000	0.0213149	0	1	A5SL	junction unmappable	0.291992
33574	2	86470001	86480000	0.00543399	0	1	A5SL	junction unmappable	0.147431
63302	3	140550001	140560000	0.00863104	0	1	A5SL	junction unmappable	0.185807
68120	3	188730001	188740000	0.012572	1	0	A5SL	CN unmappable	0.22425
78012	4	89620001	89630000	0.0281182	1	0	A5SL	CN unmappable	0.335369
103621	5	154550001	154560000	0.00520418	1	0	A5SL	CN unmappable	0.14428
111657	6	53990001	54000000	0.0109512	0	0	A5SL	mappable	0.209296
117117	6	108590001	108600000	0.043012	1	0	A5SL	CN unmappable	0.414786
155785	8	9730001	9740000	0.0146638	0	1	A5SL	junction unmappable	0.242188
160256	8	54440001	54450000	0.0104915	0	1	A5SL	junction unmappable	0.204856
192616	10	90450001	90460000	0.00898113	1	0	A5SL	CN unmappable	0.189538
204410	11	72850001	72860000	0.0125434	1	0	A5SL	CN unmappable	0.223994
205209	11	80840001	80850000	0.00408946	0	1	A5SL	junction unmappable	0.127898
208825	11	117000001	117010000	0.417166	1	0	A5SL	CN unmappable	1.29177
220972	12	103460001	103470000	0.00203003	0	1	A5SL	junction unmappable	0.0901116
234402	13	103900001	103910000	0.00749976	0	1	A5SL	junction unmappable	0.173202
237985	14	24560001	24570000	0.018933	0	1	A5SL	junction unmappable	0.275195
241682	14	61530001	61540000	0.00714818	0	1	A5SL	junction unmappable	0.169094
263073	16	65550001	65560000	0.0107845	0	0	A5SL	mappable	0.207697
267705	17	21510001	21520000	0.0130516	1	0	A5SL	CN unmappable	0.228487
148392	X	91080001	91090000	0.0110621	1	0	A5SL	CN unmappable	0.210353
16650	1	166490001	166500000	0.0164158	0	1	41db2179d8691b0d49e9bc19245ac8af93d9c637a498ec7ab822269664452482	junction unmappable	0.256248
27807	2	28800001	28810000	0.0109576	0	1	41db2179d8691b0d49e9bc19245ac8af93d9c637a498ec7ab822269664452482	junction unmappable	0.209357
30019	2	50920001	50930000	0.0192089	0	1	41db2179d8691b0d49e9bc19245ac8af93d9c637a498ec7ab822269664452482	junction unmappable	0.277192
54133	3	48860001	48870000	0.0102433	1	0	41db2179d8691b0d49e9bc19245ac8af93d9c637a498ec7ab822269664452482	CN unmappable	0.202418
58006	3	87590001	87600000	0.0124216	0	1	41db2179d8691b0d49e9bc19245ac8af93d9c637a498ec7ab822269664452482	junction unmappable	0.222904
62915	3	136680001	136690000	166.302	1	0	41db2179d8691b0d49e9bc19245ac8af93d9c637a498ec7ab822269664452482	CN unmappable	25.7916
80293	4	112430001	112440000	0.0125238	0	1	41db2179d8691b0d49e9bc19245ac8af93d9c637a498ec7ab822269664452482	junction unmappable	0.223819
118330	6	120720001	120730000	0.0108663	0	1	41db2179d8691b0d49e9bc19245ac8af93d9c637a498ec7ab822269664452482	junction unmappable	0.208483
164855	8	100430001	100440000	0.0125903	1	0	41db2179d8691b0d49e9bc19245ac8af93d9c637a498ec7ab822269664452482	CN unmappable	0.224413
164998	8	101860001	101870000	0.0194791	1	0	41db2179d8691b0d49e9bc19245ac8af93d9c637a498ec7ab822269664452482	CN unmappable	0.279135
168049	8	132370001	132380000	0.00900339	0	1	41db2179d8691b0d49e9bc19245ac8af93d9c637a498ec7ab822269664452482	junction unmappable	0.189772
173828	9	43790001	43800000	198.315	1	0	41db2179d8691b0d49e9bc19245ac8af93d9c637a498ec7ab822269664452482	CN unmappable	28.1649
214590	12	39640001	39650000	0.0064414	0	1	41db2179d8691b0d49e9bc19245ac8af93d9c637a498ec7ab822269664452482	junction unmappable	0.160517
219665	12	90390001	90400000	0.00469374	0	0	41db2179d8691b0d49e9bc19245ac8af93d9c637a498ec7ab822269664452482	mappable	0.137022
222859	12	122330001	122340000	0.0110163	0	1	41db2179d8691b0d49e9bc19245ac8af93d9c637a498ec7ab822269664452482	junction unmappable	0.209917
252726	15	64620001	64630000	0.0267768	1	0	41db2179d8691b0d49e9bc19245ac8af93d9c637a498ec7ab822269664452482	CN unmappable	0.327273
267396	17	18420001	18430000	0.0446903	1	0	41db2179d8691b0d49e9bc19245ac8af93d9c637a498ec7ab822269664452482	CN unmappable	0.422802
287356	20	58740001	58750000	0.0143367	0	1	41db2179d8691b0d49e9bc19245ac8af93d9c637a498ec7ab822269664452482	junction unmappable	0.239472
144560	X	52760001	52770000	28.8485	1	0	41db2179d8691b0d49e9bc19245ac8af93d9c637a498ec7ab822269664452482	CN unmappable	10.7422
19545	1	195440001	195450000	0.00929669	0	1	4150895	junction unmappable	0.192839
20277	1	202760001	202770000	0.0175612	0	1	4150895	junction unmappable	0.265037
51846	3	25990001	26000000	0.00779867	0	1	4150895	junction unmappable	0.17662
75820	4	67700001	67710000	0.0251402	0	1	4150895	junction unmappable	0.317113
87243	4	181930001	181940000	0.008365	1	0	4150895	CN unmappable	0.182921
91682	5	35160001	35170000	0.0186286	0	1	4150895	junction unmappable	0.272973
99302	5	111360001	111370000	0.0196907	1	0	4150895	CN unmappable	0.280647
109695	6	34370001	34380000	0.0104087	0	1	4150895	junction unmappable	0.204047
138563	7	151930001	151940000	0.0141812	1	0	4150895	CN unmappable	0.23817
158444	8	36320001	36330000	0.0140085	1	0	4150895	CN unmappable	0.236715
186306	10	27350001	27360000	0.0208632	0	1	4150895	junction unmappable	0.288882
189186	10	56150001	56160000	0.0105681	0	1	4150895	junction unmappable	0.205603
197728	11	6030001	6040000	0.0056013	0	1	4150895	junction unmappable	0.149684
229564	13	55520001	55530000	0.014131	1	0	4150895	CN unmappable	0.237748
230462	13	64500001	64510000	0.00803265	0	1	4150895	junction unmappable	0.17925
238343	14	28140001	28150000	0.0208757	1	0	4150895	CN unmappable	0.288968
244028	14	84990001	85000000	0.0140128	0	0	4150895	mappable	0.236752
268082	17	25280001	25290000	0.0131573	1	0	4150895	CN unmappable	0.22941
306270	21	15030001	15040000	0.0817711	1	0	4150895	CN unmappable	0.571913
301275	22	16390001	16400000	10.3325	1	0	4150895	CN unmappable	6.42884
38843	2	139160001	139170000	0.0108131	0	1	34f4a1f2b8d24914cefc12aee36ebb37504d07511b70fec088a1d4102da92df0	junction unmappable	0.207972
60167	3	109200001	109210000	0.0219855	0	1	34f4a1f2b8d24914cefc12aee36ebb37504d07511b70fec088a1d4102da92df0	junction unmappable	0.29655
78556	4	95060001	95070000	0.0257315	0	1	34f4a1f2b8d24914cefc12aee36ebb37504d07511b70fec088a1d4102da92df0	junction unmappable	0.320821
95210	5	70440001	70450000	127.954	1	0	34f4a1f2b8d24914cefc12aee36ebb37504d07511b70fec088a1d4102da92df0	CN unmappable	22.6233
104435	5	162690001	162700000	0.0218837	0	1	34f4a1f2b8d24914cefc12aee36ebb37504d07511b70fec088a1d4102da92df0	junction unmappable	0.295863
108001	6	17430001	17440000	0.0156776	1	0	34f4a1f2b8d24914cefc12aee36ebb37504d07511b70fec088a1d4102da92df0	CN unmappable	0.25042
115717	6	94590001	94600000	0.00512268	0	1	34f4a1f2b8d24914cefc12aee36ebb37504d07511b70fec088a1d4102da92df0	junction unmappable	0.143146
130824	7	74540001	74550000	18.4647	1	0	34f4a1f2b8d24914cefc12aee36ebb37504d07511b70fec088a1d4102da92df0	CN unmappable	8.59411
131672	7	83020001	83030000	0.013799	0	1	34f4a1f2b8d24914cefc12aee36ebb37504d07511b70fec088a1d4102da92df0	junction unmappable	0.234938
162397	8	75850001	75860000	0.0410004	1	0	34f4a1f2b8d24914cefc12aee36ebb37504d07511b70fec088a1d4102da92df0	CN unmappable	0.404971
185356	10	17850001	17860000	163.081	1	0	34f4a1f2b8d24914cefc12aee36ebb37504d07511b70fec088a1d4102da92df0	CN unmappable	25.5406
208619	11	114940001	114950000	0.0016442	0	0	34f4a1f2b8d24914cefc12aee36ebb37504d07511b70fec088a1d4102da92df0	mappable	0.0810974
217985	12	73590001	73600000	0.0201356	1	0	34f4a1f2b8d24914cefc12aee36ebb37504d07511b70fec088a1d4102da92df0	CN unmappable	0.2838
226804	13	27920001	27930000	0.0155229	0	1	34f4a1f2b8d24914cefc12aee36ebb37504d07511b70fec088a1d4102da92df0	junction unmappable	0.249182
245235	14	97060001	97070000	0.0161437	1	0	34f4a1f2b8d24914cefc12aee36ebb37504d07511b70fec088a1d4102da92df0	CN unmappable	0.254116
267601	17	20470001	20480000	0.00713034	1	0	34f4a1f2b8d24914cefc12aee36ebb37504d07511b70fec088a1d4102da92df0	CN unmappable	0.168883
268284	17	27300001	27310000	0.0173703	0	1	34f4a1f2b8d24914cefc12aee36ebb37504d07511b70fec088a1d4102da92df0	junction unmappable	0.263593
272482	17	69280001	69290000	0.0154426	0	1	34f4a1f2b8d24914cefc12aee36ebb37504d07511b70fec088a1d4102da92df0	junction unmappable	0.248536
287684	20	62020001	62030000	0.0177561	0	1	34f4a1f2b8d24914cefc12aee36ebb37504d07511b70fec088a1d4102da92df0	junction unmappable	0.266504
139640	X	3560001	3570000	0.0080973	1	0	34f4a1f2b8d24914cefc12aee36ebb37504d07511b70fec088a1d4102da92df0	CN unmappable	0.17997
139683	X	3990001	4000000	0.0062268	1	0	34f4a1f2b8d24914cefc12aee36ebb37504d07511b70fec088a1d4102da92df0	CN unmappable	0.15782
12	1	110001	120000	16.3286	1	0	A2LK	CN unmappable	8.08174
2903	1	29020001	29030000	0.0139828	1	0	A2LK	CN unmappable	0.236497
27105	2	21780001	21790000	0.00971927	0	1	A2LK	junction unmappable	0.197173
28518	2	35910001	35920000	0.0108739	0	1	A2LK	junction unmappable	0.208556
52328	3	30810001	30820000	0.0126803	0	1	A2LK	junction unmappable	0.225213
61842	3	125950001	125960000	0.00974123	0	1	A2LK	junction unmappable	0.197395
69207	4	1570001	1580000	0.00705618	1	0	A2LK	CN unmappable	0.168002
88434	5	2680001	2690000	0.00795161	0	1	A2LK	junction unmappable	0.178344
94087	5	59210001	59220000	0.0146722	0	1	A2LK	junction unmappable	0.242257
104620	5	164540001	164550000	0.0112476	1	0	A2LK	CN unmappable	0.21211
109777	6	35190001	35200000	0.0171136	0	1	A2LK	junction unmappable	0.261638
129526	7	61560001	61570000	639.678	1	0	A2LK	CN unmappable	50.5837
136636	7	132660001	132670000	0.0172839	1	0	A2LK	CN unmappable	0.262936
138717	7	153470001	153480000	0.030654	1	0	A2LK	CN unmappable	0.350166
238434	14	29050001	29060000	0.00894636	0	1	A2LK	junction unmappable	0.18917
250133	15	38690001	38700000	0.0126349	0	1	A2LK	junction unmappable	0.22481
267463	17	19090001	19100000	44.9688	1	0	A2LK	CN unmappable	13.4118
287364	20	58820001	58830000	0.00492172	0	1	A2LK	junction unmappable	0.14031
307658	21	28910001	28920000	0.01097	1	0	A2LK	CN unmappable	0.209475
144095	X	48110001	48120000	0.0169781	1	0	A2LK	CN unmappable	0.2606
30495	2	55680001	55690000	0.0126394	0	1	43776438d2da3665682507747485430a7b1fd322b84446bcbf6a3e3dd9cfea32	junction unmappable	0.22485
32189	2	72620001	72630000	0.00419121	1	0	43776438d2da3665682507747485430a7b1fd322b84446bcbf6a3e3dd9cfea32	CN unmappable	0.129479
43885	2	189580001	189590000	0.0116386	0	1	43776438d2da3665682507747485430a7b1fd322b84446bcbf6a3e3dd9cfea32	junction unmappable	0.215764
81113	4	120630001	120640000	0.0132919	0	1	43776438d2da3665682507747485430a7b1fd322b84446bcbf6a3e3dd9cfea32	junction unmappable	0.230581
82839	4	137890001	137900000	0.0147301	0	1	43776438d2da3665682507747485430a7b1fd322b84446bcbf6a3e3dd9cfea32	junction unmappable	0.242735
90295	5	21290001	21300000	0.0135303	1	0	43776438d2da3665682507747485430a7b1fd322b84446bcbf6a3e3dd9cfea32	CN unmappable	0.23264
118086	6	118280001	118290000	0.0064831	0	1	43776438d2da3665682507747485430a7b1fd322b84446bcbf6a3e3dd9cfea32	junction unmappable	0.161035
129508	7	61380001	61390000	13.1833	1	0	43776438d2da3665682507747485430a7b1fd322b84446bcbf6a3e3dd9cfea32	CN unmappable	7.26177
169095	8	142830001	142840000	0.030243	0	1	43776438d2da3665682507747485430a7b1fd322b84446bcbf6a3e3dd9cfea32	junction unmappable	0.34781
189201	10	56300001	56310000	0.0168055	0	1	43776438d2da3665682507747485430a7b1fd322b84446bcbf6a3e3dd9cfea32	junction unmappable	0.259272
192644	10	90730001	90740000	0.0136051	1	0	43776438d2da3665682507747485430a7b1fd322b84446bcbf6a3e3dd9cfea32	CN unmappable	0.233282
220004	12	93780001	93790000	0.00940994	1	0	43776438d2da3665682507747485430a7b1fd322b84446bcbf6a3e3dd9cfea32	CN unmappable	0.19401
242618	14	70890001	70900000	0.0140594	1	0	43776438d2da3665682507747485430a7b1fd322b84446bcbf6a3e3dd9cfea32	CN unmappable	0.237145
264762	16	82440001	82450000	0.012303	0	1	43776438d2da3665682507747485430a7b1fd322b84446bcbf6a3e3dd9cfea32	junction unmappable	0.221838
296514	19	27910001	27920000	0.00693302	1	0	43776438d2da3665682507747485430a7b1fd322b84446bcbf6a3e3dd9cfea32	CN unmappable	0.166529
309088	21	43210001	43220000	0.0243208	0	1	43776438d2da3665682507747485430a7b1fd322b84446bcbf6a3e3dd9cfea32	junction unmappable	0.311902
304352	22	47160001	47170000	0.0106301	1	0	43776438d2da3665682507747485430a7b1fd322b84446bcbf6a3e3dd9cfea32	CN unmappable	0.206205
304593	22	49570001	49580000	0.0101804	0	0	43776438d2da3665682507747485430a7b1fd322b84446bcbf6a3e3dd9cfea32	mappable	0.201795
145960	X	66760001	66770000	0.00851805	0	1	43776438d2da3665682507747485430a7b1fd322b84446bcbf6a3e3dd9cfea32	junction unmappable	0.184587
146395	X	71110001	71120000	0.00469488	1	0	43776438d2da3665682507747485430a7b1fd322b84446bcbf6a3e3dd9cfea32	CN unmappable	0.137038
19178	1	191770001	191780000	0.00668659	0	1	1459	junction unmappable	0.163543
40672	2	157450001	157460000	0.0109636	0	1	1459	junction unmappable	0.209414
47600	2	226730001	226740000	0.0179433	1	0	1459	CN unmappable	0.267906
57086	3	78390001	78400000	0.0114795	0	1	1459	junction unmappable	0.214285
59398	3	101510001	101520000	0.0257248	1	0	1459	CN unmappable	0.320779
104029	5	158630001	158640000	0.0135948	1	0	1459	CN unmappable	0.233193
118131	6	118730001	118740000	0.0156515	0	1	1459	junction unmappable	0.250212
123240	6	169820001	169830000	0.0152004	0	1	1459	junction unmappable	0.24658
128529	7	51590001	51600000	0.224731	1	0	1459	CN unmappable	0.948117
155517	8	7050001	7060000	1.0781	1	0	1459	CN unmappable	2.07663
160735	8	59230001	59240000	0.0262743	1	0	1459	CN unmappable	0.324187
167381	8	125690001	125700000	0.00772245	0	1	1459	junction unmappable	0.175755
173328	9	38790001	38800000	0.0428293	1	0	1459	CN unmappable	0.413905
185386	10	18150001	18160000	0.402502	1	0	1459	CN unmappable	1.26886
185421	10	18500001	18510000	0.015469	1	0	1459	CN unmappable	0.248748
219084	12	84580001	84590000	0.0125664	0	1	1459	junction unmappable	0.2242
223526	12	129000001	129010000	0.00915083	0	1	1459	junction unmappable	0.19132
259808	16	32900001	32910000	0.0111399	1	0	1459	CN unmappable	0.211091
277086	18	34120001	34130000	0.0273398	0	1	1459	junction unmappable	0.330695
295464	19	17410001	17420000	0.00814171	0	1	1459	junction unmappable	0.180463
5082	1	50810001	50820000	0.00789862	0	1	CA-0200	junction unmappable	0.177748
19873	1	198720001	198730000	0.00472219	0	1	CA-0200	junction unmappable	0.137436
49708	3	4610001	4620000	0.00556327	0	1	CA-0200	junction unmappable	0.149175
61003	3	117560001	117570000	0.0157644	0	0	CA-0200	mappable	0.251113
66565	3	173180001	173190000	0.0154576	0	1	CA-0200	junction unmappable	0.248657
67678	3	184310001	184320000	0.0178858	0	1	CA-0200	junction unmappable	0.267476
68829	3	195820001	195830000	0.0109164	1	0	CA-0200	CN unmappable	0.208963
76535	4	74850001	74860000	0.00610445	0	1	CA-0200	junction unmappable	0.156262
78685	4	96350001	96360000	0.0152944	0	1	CA-0200	junction unmappable	0.247341
83539	4	144890001	144900000	0.00646658	1	0	CA-0200	CN unmappable	0.16083
93402	5	52360001	52370000	0.025613	0	0	CA-0200	mappable	0.320082
98106	5	99400001	99410000	0.030826	1	0	CA-0200	CN unmappable	0.351146
131329	7	79590001	79600000	0.0118954	0	1	CA-0200	junction unmappable	0.218132
182383	9	129340001	129350000	0.0148282	1	0	CA-0200	CN unmappable	0.243542
187389	10	38180001	38190000	0.00967832	1	0	CA-0200	CN unmappable	0.196757
189689	10	61180001	61190000	0.004159	1	0	CA-0200	CN unmappable	0.128981
196950	10	133790001	133800000	0.0325271	1	0	CA-0200	CN unmappable	0.360705
215439	12	48130001	48140000	0.0165002	0	0	CA-0200	mappable	0.256906
234607	13	105950001	105960000	0.00986308	1	0	CA-0200	CN unmappable	0.198626
256912	16	3940001	3950000	0.0101311	0	1	CA-0200	junction unmappable	0.201307
258365	16	18470001	18480000	92.1711	1	0	CA-0200	CN unmappable	19.2012
259360	16	28420001	28430000	86.2784	1	0	CA-0200	CN unmappable	18.5772
141468	X	21840001	21850000	0.0169418	0	1	CA-0200	junction unmappable	0.260321
37527	2	126000001	126010000	0.0149691	1	0	A2H5	CN unmappable	0.244697
61606	3	123590001	123600000	0.00372789	0	1	A2H5	junction unmappable	0.122113
64232	3	149850001	149860000	0.0124628	0	1	A2H5	junction unmappable	0.223274
95644	5	74780001	74790000	0.0104891	0	1	A2H5	junction unmappable	0.204833
101249	5	130830001	130840000	0.0215103	0	1	A2H5	junction unmappable	0.293328
103294	5	151280001	151290000	0.0209824	0	0	A2H5	mappable	0.289706
112001	6	57430001	57440000	0.00474098	1	0	A2H5	CN unmappable	0.13771
119201	6	129430001	129440000	0.00691065	0	0	A2H5	mappable	0.166261
137493	7	141230001	141240000	0.0112905	0	1	A2H5	junction unmappable	0.212514
155539	8	7270001	7280000	0.291613	1	0	A2H5	CN unmappable	1.08002
157275	8	24630001	24640000	0.00943744	1	0	A2H5	CN unmappable	0.194293
166258	8	114460001	114470000	0.0108278	1	0	A2H5	CN unmappable	0.208114
169112	8	143000001	143010000	0.0255357	0	1	A2H5	junction unmappable	0.319598
199610	11	24850001	24860000	0.00796545	0	1	A2H5	junction unmappable	0.178499
204783	11	76580001	76590000	0.0114284	0	1	A2H5	junction unmappable	0.213808
231505	13	74930001	74940000	0.00506353	0	1	A2H5	junction unmappable	0.142317
239005	14	34760001	34770000	0.661714	1	0	A2H5	CN unmappable	1.62692
242679	14	71500001	71510000	0.0234376	1	0	A2H5	CN unmappable	0.306187
283186	20	17040001	17050000	0.0364057	0	0	A2H5	mappable	0.381605
306202	21	14350001	14360000	0.00903491	1	0	A2H5	CN unmappable	0.190104
144892	X	56080001	56090000	0.012546	1	0	A2H5	CN unmappable	0.224018
148677	X	93930001	93940000	0.0169618	0	1	A2H5	junction unmappable	0.260475
143	1	1420001	1430000	0.0101309	0	1	A06B	junction unmappable	0.201304
6533	1	65320001	65330000	0.00651711	0	1	A06B	junction unmappable	0.161457
14878	1	148770001	148780000	28.1573	1	0	A06B	CN unmappable	10.6127
18071	1	180700001	180710000	0.0205968	0	1	A06B	junction unmappable	0.287032
20215	1	202140001	202150000	0.165659	1	0	A06B	CN unmappable	0.814025
24215	1	242140001	242150000	0.013914	0	1	A06B	junction unmappable	0.235915
51988	3	27410001	27420000	0.00926721	0	1	A06B	junction unmappable	0.192533
69795	4	7450001	7460000	0.0237938	1	0	A06B	CN unmappable	0.308505
80049	4	109990001	110000000	0.00864956	1	0	A06B	CN unmappable	0.186006
95966	5	78000001	78010000	0.0219837	1	0	A06B	CN unmappable	0.296538
118829	6	125710001	125720000	0.581407	1	0	A06B	CN unmappable	1.525
120292	6	140340001	140350000	0.0173178	0	1	A06B	junction unmappable	0.263195
120980	6	147220001	147230000	0.0257907	0	1	A06B	junction unmappable	0.32119
123672	7	3020001	3030000	0.0260098	0	1	A06B	junction unmappable	0.322551
176424	9	69750001	69760000	65.946	1	0	A06B	CN unmappable	16.2414
178322	9	88730001	88740000	0.0135477	0	1	A06B	junction unmappable	0.232789
269884	17	43300001	43310000	0.012452	0	0	A06B	mappable	0.223177
298681	19	49580001	49590000	0.0140577	0	1	A06B	junction unmappable	0.237131
151436	X	121520001	121530000	0.0130951	1	0	A06B	CN unmappable	0.228868
8943	1	89420001	89430000	0.0233829	0	1	3d6f94f343bc3a4030461f304e31d6aea165b3bb39f965d71697c7db8c1cee47	junction unmappable	0.305829
26309	2	13820001	13830000	0.00901824	0	1	3d6f94f343bc3a4030461f304e31d6aea165b3bb39f965d71697c7db8c1cee47	junction unmappable	0.189929
44293	2	193660001	193670000	0.00784107	0	0	3d6f94f343bc3a4030461f304e31d6aea165b3bb39f965d71697c7db8c1cee47	mappable	0.1771
84670	4	156200001	156210000	0.0338736	1	0	3d6f94f343bc3a4030461f304e31d6aea165b3bb39f965d71697c7db8c1cee47	CN unmappable	0.368096
84794	4	157440001	157450000	0.00537693	0	0	3d6f94f343bc3a4030461f304e31d6aea165b3bb39f965d71697c7db8c1cee47	mappable	0.146655
99725	5	115590001	115600000	0.0114768	1	0	3d6f94f343bc3a4030461f304e31d6aea165b3bb39f965d71697c7db8c1cee47	CN unmappable	0.214259
119838	6	135800001	135810000	0.00733326	0	1	3d6f94f343bc3a4030461f304e31d6aea165b3bb39f965d71697c7db8c1cee47	junction unmappable	0.171269
125841	7	24710001	24720000	0.0209382	1	0	3d6f94f343bc3a4030461f304e31d6aea165b3bb39f965d71697c7db8c1cee47	CN unmappable	0.2894
132202	7	88320001	88330000	0.0136192	0	1	3d6f94f343bc3a4030461f304e31d6aea165b3bb39f965d71697c7db8c1cee47	junction unmappable	0.233403
155803	8	9910001	9920000	0.0139374	0	1	3d6f94f343bc3a4030461f304e31d6aea165b3bb39f965d71697c7db8c1cee47	junction unmappable	0.236113
164446	8	96340001	96350000	0.0141376	1	0	3d6f94f343bc3a4030461f304e31d6aea165b3bb39f965d71697c7db8c1cee47	CN unmappable	0.237803
167404	8	125920001	125930000	0.0085031	1	0	3d6f94f343bc3a4030461f304e31d6aea165b3bb39f965d71697c7db8c1cee47	CN unmappable	0.184424
189126	10	55550001	55560000	0.0300731	1	0	3d6f94f343bc3a4030461f304e31d6aea165b3bb39f965d71697c7db8c1cee47	CN unmappable	0.346832
194613	10	110420001	110430000	0.0125372	0	1	3d6f94f343bc3a4030461f304e31d6aea165b3bb39f965d71697c7db8c1cee47	junction unmappable	0.223939
203611	11	64860001	64870000	0.00858197	0	1	3d6f94f343bc3a4030461f304e31d6aea165b3bb39f965d71697c7db8c1cee47	junction unmappable	0.185278
256221	15	99570001	99580000	0.0781525	1	0	3d6f94f343bc3a4030461f304e31d6aea165b3bb39f965d71697c7db8c1cee47	CN unmappable	0.559116
283057	20	15750001	15760000	0.0138477	0	1	3d6f94f343bc3a4030461f304e31d6aea165b3bb39f965d71697c7db8c1cee47	junction unmappable	0.235353
283177	20	16950001	16960000	0.0153677	0	1	3d6f94f343bc3a4030461f304e31d6aea165b3bb39f965d71697c7db8c1cee47	junction unmappable	0.247933
139702	X	4180001	4190000	0.00666877	1	0	3d6f94f343bc3a4030461f304e31d6aea165b3bb39f965d71697c7db8c1cee47	CN unmappable	0.163325
143261	X	39770001	39780000	0.0136002	0	1	3d6f94f343bc3a4030461f304e31d6aea165b3bb39f965d71697c7db8c1cee47	junction unmappable	0.23324
3888	1	38870001	38880000	0.0123342	0	1	779-24094-67M-28--779-21582N-67M-GST	junction unmappable	0.222118
5195	1	51940001	51950000	0.0190738	0	1	779-24094-67M-28--779-21582N-67M-GST	junction unmappable	0.276216
14960	1	149590001	149600000	97.2529	1	0	779-24094-67M-28--779-21582N-67M-GST	CN unmappable	19.7234
22415	1	224140001	224150000	0.0159756	1	0	779-24094-67M-28--779-21582N-67M-GST	CN unmappable	0.252789
24325	1	243240001	243250000	0.0129831	1	0	779-24094-67M-28--779-21582N-67M-GST	CN unmappable	0.227886
32488	2	75610001	75620000	0.0100468	0	1	779-24094-67M-28--779-21582N-67M-GST	junction unmappable	0.200467
33033	2	81060001	81070000	0.0131418	0	1	779-24094-67M-28--779-21582N-67M-GST	junction unmappable	0.229275
33714	2	87870001	87880000	0.0280158	1	0	779-24094-67M-28--779-21582N-67M-GST	CN unmappable	0.334758
35277	2	103500001	103510000	0.0164885	1	0	779-24094-67M-28--779-21582N-67M-GST	CN unmappable	0.256815
97139	5	89730001	89740000	0.0255305	1	0	779-24094-67M-28--779-21582N-67M-GST	CN unmappable	0.319565
117194	6	109360001	109370000	0.0154506	1	0	779-24094-67M-28--779-21582N-67M-GST	CN unmappable	0.248601
132430	7	90600001	90610000	0.00828703	0	1	779-24094-67M-28--779-21582N-67M-GST	junction unmappable	0.182066
166632	8	118200001	118210000	0.0136003	1	0	779-24094-67M-28--779-21582N-67M-GST	CN unmappable	0.233241
201476	11	43510001	43520000	0.00715698	0	1	779-24094-67M-28--779-21582N-67M-GST	junction unmappable	0.169198
213976	12	33500001	33510000	0.0124651	0	1	779-24094-67M-28--779-21582N-67M-GST	junction unmappable	0.223295
239588	14	40590001	40600000	0.0122227	0	1	779-24094-67M-28--779-21582N-67M-GST	junction unmappable	0.221113
259445	16	29270001	29280000	0.0225002	0	1	779-24094-67M-28--779-21582N-67M-GST	junction unmappable	0.300001
299232	19	55090001	55100000	31.3022	1	0	779-24094-67M-28--779-21582N-67M-GST	CN unmappable	11.1897
299607	19	58840001	58850000	0.0124511	0	1	779-24094-67M-28--779-21582N-67M-GST	junction unmappable	0.223169
148166	X	88820001	88830000	0.0161248	1	0	779-24094-67M-28--779-21582N-67M-GST	CN unmappable	0.253967
6951	1	69500001	69510000	0.0336977	1	0	6956	CN unmappable	0.367139
11332	1	113310001	113320000	0.0412752	1	0	6956	CN unmappable	0.406326
33092	2	81650001	81660000	0.0131288	1	0	6956	CN unmappable	0.229162
44344	2	194170001	194180000	0.0125764	0	1	6956	junction unmappable	0.224289
44428	2	195010001	195020000	0.0102761	0	1	6956	junction unmappable	0.202742
47716	2	227890001	227900000	0.0160237	0	1	6956	junction unmappable	0.253169
88255	5	890001	900000	8.14581	1	0	6956	CN unmappable	5.70817
126178	7	28080001	28090000	0.0168461	0	1	6956	junction unmappable	0.259585
130615	7	72450001	72460000	138.123	1	0	6956	CN unmappable	23.5051
199025	11	19000001	19010000	0.0103582	0	1	6956	junction unmappable	0.203551
212520	12	18940001	18950000	0.0268426	1	0	6956	CN unmappable	0.327674
220827	12	102010001	102020000	0.00513601	0	1	6956	junction unmappable	0.143332
244083	14	85540001	85550000	0.0136401	0	1	6956	junction unmappable	0.233582
272013	17	64590001	64600000	127.549	1	0	6956	CN unmappable	22.5875
281311	18	76370001	76380000	0.016202	1	0	6956	CN unmappable	0.254574
295961	19	22380001	22390000	0.00720845	0	1	6956	junction unmappable	0.169805
297589	19	38660001	38670000	0.00515022	0	1	6956	junction unmappable	0.14353
305770	21	10030001	10040000	0.306721	1	0	6956	CN unmappable	1.10765
150524	X	112400001	112410000	0.00623824	0	1	6956	junction unmappable	0.157965
151834	X	125500001	125510000	0.0196671	1	0	6956	CN unmappable	0.280479
60758	3	115110001	115120000	0.00438871	0	1	A4NG	junction unmappable	0.132495
72975	4	39250001	39260000	0.0156719	1	0	A4NG	CN unmappable	0.250375
86360	4	173100001	173110000	0.0217988	1	0	A4NG	CN unmappable	0.295288
157066	8	22540001	22550000	0.00483657	0	0	A4NG	mappable	0.139091
174038	9	45890001	45900000	52.5828	1	0	A4NG	CN unmappable	14.5028
187924	10	43530001	43540000	0.0201027	0	0	A4NG	mappable	0.283568
207103	11	99780001	99790000	0.0173381	0	1	A4NG	junction unmappable	0.263348
207442	11	103170001	103180000	0.0112616	0	1	A4NG	junction unmappable	0.212241
213907	12	32810001	32820000	0.00203846	1	0	A4NG	CN unmappable	0.0902987
216244	12	56180001	56190000	0.015442	0	1	A4NG	junction unmappable	0.248532
228785	13	47730001	47740000	0.00450692	0	1	A4NG	junction unmappable	0.134267
235515	13	115030001	115040000	0.00655024	0	1	A4NG	junction unmappable	0.161867
239590	14	40610001	40620000	0.264998	1	0	A4NG	CN unmappable	1.02956
258011	16	14930001	14940000	0.019582	1	0	A4NG	CN unmappable	0.279871
267131	17	15770001	15780000	0.0190408	1	0	A4NG	CN unmappable	0.275976
267688	17	21340001	21350000	0.00630375	1	0	A4NG	CN unmappable	0.158792
271821	17	62670001	62680000	0.0148806	0	1	A4NG	junction unmappable	0.243972
272965	17	74110001	74120000	0.00534056	0	1	A4NG	junction unmappable	0.146158
275951	18	22770001	22780000	0.00585988	0	0	A4NG	mappable	0.1531
277723	18	40490001	40500000	0.013502	0	1	A4NG	junction unmappable	0.232396
278033	18	43590001	43600000	0.0112801	0	1	A4NG	junction unmappable	0.212416
7394	1	73930001	73940000	0.0135499	1	0	5647	CN unmappable	0.232808
21090	1	210890001	210900000	0.00813088	1	0	5647	CN unmappable	0.180343
26605	2	16780001	16790000	0.0145973	1	0	5647	CN unmappable	0.241638
32181	2	72540001	72550000	0.0124713	0	1	5647	junction unmappable	0.22335
63715	3	144680001	144690000	0.0230229	0	1	5647	junction unmappable	0.303466
106304	6	460001	470000	0.00688314	1	0	5647	CN unmappable	0.165929
107114	6	8560001	8570000	0.105281	1	0	5647	CN unmappable	0.648942
110642	6	43840001	43850000	0.0109469	0	0	5647	mappable	0.209255
116064	6	98060001	98070000	0.00804467	0	1	5647	junction unmappable	0.179384
116833	6	105750001	105760000	0.00504856	0	1	5647	junction unmappable	0.142106
120893	6	146350001	146360000	0.00332727	0	0	5647	mappable	0.115365
128931	7	55610001	55620000	0.00262416	0	1	5647	junction unmappable	0.102453
189032	10	54610001	54620000	0.013824	0	1	5647	junction unmappable	0.235151
196788	10	132170001	132180000	0.0140639	0	1	5647	junction unmappable	0.237183
197056	10	134850001	134860000	0.00576136	1	0	5647	CN unmappable	0.151807
237631	14	21020001	21030000	0.010215	0	1	5647	junction unmappable	0.202138
255381	15	91170001	91180000	0.0146722	1	0	5647	CN unmappable	0.242257
280085	18	64110001	64120000	0.0221238	1	0	5647	CN unmappable	0.297481
294007	19	2840001	2850000	0.00625437	0	1	5647	junction unmappable	0.158169
282785	20	13030001	13040000	0.0104514	0	1	5647	junction unmappable	0.204464
151430	X	121460001	121470000	0.0119522	1	0	5647	CN unmappable	0.218652
10900	1	108990001	109000000	6.44872	1	0	MELA_0254	CN unmappable	5.07887
53117	3	38700001	38710000	0.0135163	0	1	MELA_0254	junction unmappable	0.232519
62848	3	136010001	136020000	0.00726944	0	1	MELA_0254	junction unmappable	0.170522
90884	5	27180001	27190000	0.00508786	0	1	MELA_0254	junction unmappable	0.142658
139143	7	157730001	157740000	0.0375859	1	0	MELA_0254	CN unmappable	0.387742
161326	8	65140001	65150000	0.0834339	1	0	MELA_0254	CN unmappable	0.577699
173580	9	41310001	41320000	11.615	1	0	MELA_0254	CN unmappable	6.81615
188108	10	45370001	45380000	0.00908597	0	1	MELA_0254	junction unmappable	0.190641
188827	10	52560001	52570000	0.0118077	0	1	MELA_0254	junction unmappable	0.217326
189860	10	62890001	62900000	0.0067589	0	0	MELA_0254	mappable	0.164425
197197	11	720001	730000	0.00492871	0	1	MELA_0254	junction unmappable	0.14041
205023	11	78980001	78990000	0.0170449	0	0	MELA_0254	mappable	0.261112
207579	11	104540001	104550000	0.135422	1	0	MELA_0254	CN unmappable	0.735994
232763	13	87510001	87520000	0.011408	0	1	MELA_0254	junction unmappable	0.213616
239544	14	40150001	40160000	0.0177277	0	1	MELA_0254	junction unmappable	0.266291
249353	15	30890001	30900000	297.343	1	0	MELA_0254	CN unmappable	34.4873
278551	18	48770001	48780000	0.00354696	0	1	MELA_0254	junction unmappable	0.119113
145089	X	58050001	58060000	0.0106229	0	1	MELA_0254	junction unmappable	0.206135
148013	X	87290001	87300000	0.0190051	1	0	MELA_0254	CN unmappable	0.275718
149435	X	101510001	101520000	13.4095	1	0	MELA_0254	CN unmappable	7.32379
153440	X	141560001	141570000	3.58833	1	0	MELA_0254	CN unmappable	3.78858
24075	1	240740001	240750000	0.011323	0	1	A495	junction unmappable	0.212819
26229	2	13020001	13030000	0.0128823	0	1	A495	junction unmappable	0.227001
55530	3	62830001	62840000	0.0369754	1	0	A495	CN unmappable	0.38458
65188	3	159410001	159420000	0.014388	0	1	A495	junction unmappable	0.2399
66973	3	177260001	177270000	0.0181249	0	1	A495	junction unmappable	0.269257
85513	4	164630001	164640000	0.00701213	0	1	A495	junction unmappable	0.167477
111614	6	53560001	53570000	0.0148327	0	0	A495	mappable	0.243579
112066	6	58080001	58090000	123.477	1	0	A495	CN unmappable	22.224
157326	8	25140001	25150000	0.0128319	0	1	A495	junction unmappable	0.226556
181466	9	120170001	120180000	0.0128273	0	0	A495	mappable	0.226516
210603	11	134780001	134790000	0.0102375	0	0	A495	mappable	0.202361
238767	14	32380001	32390000	0.0211473	0	1	A495	junction unmappable	0.290842
248460	15	21960001	21970000	56.2619	1	0	A495	CN unmappable	15.0016
254570	15	83060001	83070000	37.4752	1	0	A495	CN unmappable	12.2434
264410	16	78920001	78930000	0.00990654	0	1	A495	junction unmappable	0.199063
273999	18	3250001	3260000	0.00638997	0	1	A495	junction unmappable	0.159875
283757	20	22750001	22760000	0.0038913	0	1	A495	junction unmappable	0.124761
148159	X	88750001	88760000	0.00932797	1	0	A495	CN unmappable	0.193163
148309	X	90250001	90260000	0.0219775	1	0	A495	CN unmappable	0.296496
149598	X	103140001	103150000	0.070106	1	0	A495	CN unmappable	0.529551
151001	X	117170001	117180000	0.027296	1	0	A495	CN unmappable	0.33043
152411	X	131270001	131280000	0.0253218	1	0	A495	CN unmappable	0.318256
1342	1	13410001	13420000	76.8651	1	0	702-24855-115P-33--702-25030N-55S-BLD	CN unmappable	17.5346
2770	1	27690001	27700000	0.0192867	0	1	702-24855-115P-33--702-25030N-55S-BLD	junction unmappable	0.277753
8980	1	89790001	89800000	0.0173423	0	1	702-24855-115P-33--702-25030N-55S-BLD	junction unmappable	0.26338
12068	1	120670001	120680000	0.0642718	1	0	702-24855-115P-33--702-25030N-55S-BLD	CN unmappable	0.507037
27548	2	26210001	26220000	0.00633155	1	0	702-24855-115P-33--702-25030N-55S-BLD	CN unmappable	0.159142
53905	3	46580001	46590000	0.0127982	0	1	702-24855-115P-33--702-25030N-55S-BLD	junction unmappable	0.226258
62542	3	132950001	132960000	0.0096119	1	0	702-24855-115P-33--702-25030N-55S-BLD	CN unmappable	0.196081
83455	4	144050001	144060000	0.00640305	0	1	702-24855-115P-33--702-25030N-55S-BLD	junction unmappable	0.160038
102940	5	147740001	147750000	0.00606866	0	1	702-24855-115P-33--702-25030N-55S-BLD	junction unmappable	0.155803
106230	5	180640001	180650000	0.0545956	1	0	702-24855-115P-33--702-25030N-55S-BLD	CN unmappable	0.467314
137841	7	144710001	144720000	0.0886283	1	0	702-24855-115P-33--702-25030N-55S-BLD	CN unmappable	0.59541
173710	9	42610001	42620000	0.98986	1	0	702-24855-115P-33--702-25030N-55S-BLD	CN unmappable	1.98983
204656	11	75310001	75320000	0.018797	0	0	702-24855-115P-33--702-25030N-55S-BLD	mappable	0.274204
205865	11	87400001	87410000	0.00921437	1	0	702-24855-115P-33--702-25030N-55S-BLD	CN unmappable	0.191983
211599	12	9730001	9740000	0.0289609	1	0	702-24855-115P-33--702-25030N-55S-BLD	CN unmappable	0.340358
233412	13	94000001	94010000	0.00720984	0	1	702-24855-115P-33--702-25030N-55S-BLD	junction unmappable	0.169822
254794	15	85300001	85310000	0.00685501	0	1	702-24855-115P-33--702-25030N-55S-BLD	junction unmappable	0.16559
280259	18	65850001	65860000	0.00659623	0	1	702-24855-115P-33--702-25030N-55S-BLD	junction unmappable	0.162434
308220	21	34530001	34540000	0.0097965	0	1	702-24855-115P-33--702-25030N-55S-BLD	junction unmappable	0.197955
142870	X	35860001	35870000	0.0082994	0	1	702-24855-115P-33--702-25030N-55S-BLD	junction unmappable	0.182202
24003	1	240020001	240030000	0.00376596	0	1	8041	junction unmappable	0.122735
26369	2	14420001	14430000	0.010199	0	1	8041	junction unmappable	0.20198
35497	2	105700001	105710000	0.0095088	0	0	8041	mappable	0.195026
74817	4	57670001	57680000	0.0150278	0	1	8041	junction unmappable	0.245176
98049	5	98830001	98840000	1.61557	1	0	8041	CN unmappable	2.54211
101740	5	135740001	135750000	0.012675	1	0	8041	CN unmappable	0.225166
117643	6	113850001	113860000	0.0202505	1	0	8041	CN unmappable	0.284608
123716	7	3460001	3470000	0.0146475	0	1	8041	junction unmappable	0.242054
138114	7	147440001	147450000	0.00621275	0	1	8041	junction unmappable	0.157642
156162	8	13500001	13510000	0.011963	1	0	8041	CN unmappable	0.218751
169975	9	5260001	5270000	0.00948584	0	1	8041	junction unmappable	0.194791
173743	9	42940001	42950000	68.8565	1	0	8041	CN unmappable	16.596
179417	9	99680001	99690000	0.00859813	1	0	8041	CN unmappable	0.185452
187862	10	42910001	42920000	0.0169771	0	1	8041	junction unmappable	0.260592
196747	10	131760001	131770000	0.00259001	0	0	8041	mappable	0.101784
216729	12	61030001	61040000	0.0463152	1	0	8041	CN unmappable	0.430419
239931	14	44020001	44030000	0.01802	0	1	8041	junction unmappable	0.268477
239958	14	44290001	44300000	0.00592558	0	1	8041	junction unmappable	0.153956
252105	15	58410001	58420000	0.0227201	1	0	8041	CN unmappable	0.301464
257929	16	14110001	14120000	0.00671655	1	0	8041	CN unmappable	0.163909
274510	18	8360001	8370000	0.0158871	0	1	8041	junction unmappable	0.252088
141574	X	22900001	22910000	0.00648133	0	0	8041	mappable	0.161013
145689	X	64050001	64060000	0.0144645	1	0	8041	CN unmappable	0.240537
5880	1	58790001	58800000	0.0221231	0	1	6775	junction unmappable	0.297477
33054	2	81270001	81280000	0.00862569	0	0	6775	mappable	0.185749
45187	2	202600001	202610000	0.00958414	0	1	6775	junction unmappable	0.195797
49622	3	3750001	3760000	0.0146535	0	1	6775	junction unmappable	0.242103
86141	4	170910001	170920000	0.0112043	0	0	6775	mappable	0.211701
101474	5	133080001	133090000	0.020348	0	1	6775	junction unmappable	0.285293
107516	6	12580001	12590000	0.0292993	0	1	6775	junction unmappable	0.342341
129081	7	57110001	57120000	33.4834	1	0	6775	CN unmappable	11.573
130613	7	72430001	72440000	3.36698	1	0	6775	CN unmappable	3.66987
137616	7	142460001	142470000	0.0125892	1	0	6775	CN unmappable	0.224403
160406	8	55940001	55950000	0.0111332	0	1	6775	junction unmappable	0.211028
170594	9	11450001	11460000	0.0171155	0	1	6775	junction unmappable	0.261652
180719	9	112700001	112710000	0.0215989	0	1	6775	junction unmappable	0.293931
188654	10	50830001	50840000	5.84009	0	0	6775	mappable	4.83326
191188	10	76170001	76180000	0.00898029	0	1	6775	junction unmappable	0.189529
192961	10	93900001	93910000	0.0225967	1	0	6775	CN unmappable	0.300644
193601	10	100300001	100310000	0.0121641	1	0	6775	CN unmappable	0.220582
198611	11	14860001	14870000	0.0389636	1	0	6775	CN unmappable	0.394784
201087	11	39620001	39630000	0.0140182	1	0	6775	CN unmappable	0.236797
233220	13	92080001	92090000	0.00672284	1	0	6775	CN unmappable	0.163986
276289	18	26150001	26160000	0.0113434	1	0	6775	CN unmappable	0.213011
287105	20	56230001	56240000	0.00655374	0	1	6775	junction unmappable	0.16191
302073	22	24370001	24380000	0.0465964	1	0	6775	CN unmappable	0.431724
6823	1	68220001	68230000	0.0164555	0	1	4134434	junction unmappable	0.256558
14624	1	146230001	146240000	13.7706	1	0	4134434	CN unmappable	7.42176
18767	1	187660001	187670000	0.0188627	0	1	4134434	junction unmappable	0.274683
40815	2	158880001	158890000	0.0136226	0	1	4134434	junction unmappable	0.233431
65518	3	162710001	162720000	0.0134503	1	0	4134434	CN unmappable	0.231951
97034	5	88680001	88690000	0.0236212	0	0	4134434	mappable	0.307384
126924	7	35540001	35550000	0.0120053	0	1	4134434	junction unmappable	0.219137
133705	7	103350001	103360000	0.00743251	0	1	4134434	junction unmappable	0.172424
161015	8	62030001	62040000	0.0455393	1	0	4134434	CN unmappable	0.426799
171507	9	20580001	20590000	0.00530796	1	0	4134434	CN unmappable	0.145712
173585	9	41360001	41370000	0.072578	1	0	4134434	CN unmappable	0.538806
176327	9	68780001	68790000	0.024912	1	0	4134434	CN unmappable	0.315671
219396	12	87700001	87710000	0.0195824	1	0	4134434	CN unmappable	0.279874
232688	13	86760001	86770000	60.9766	1	0	4134434	CN unmappable	15.6175
241124	14	55950001	55960000	0.00495577	1	0	4134434	CN unmappable	0.140794
244922	14	93930001	93940000	0.0134476	0	1	4134434	junction unmappable	0.231927
244926	14	93970001	93980000	0.0133437	0	1	4134434	junction unmappable	0.23103
250012	15	37480001	37490000	0.0134416	0	1	4134434	junction unmappable	0.231876
269238	17	36840001	36850000	0.0126828	0	1	4134434	junction unmappable	0.225236
309331	21	45640001	45650000	0.0055134	0	1	4134434	junction unmappable	0.148505
149703	X	104190001	104200000	0.0146752	1	0	4134434	CN unmappable	0.242283
3321	1	33200001	33210000	0.0286861	1	0	75ce1bd6dbaf2d4ca50f51e6c1f2a09f3275b080539a07ac7ed962ae72c5179f	CN unmappable	0.338739
17162	1	171610001	171620000	0.0186909	0	1	75ce1bd6dbaf2d4ca50f51e6c1f2a09f3275b080539a07ac7ed962ae72c5179f	junction unmappable	0.27343
34870	2	99430001	99440000	0.00831005	0	1	75ce1bd6dbaf2d4ca50f51e6c1f2a09f3275b080539a07ac7ed962ae72c5179f	junction unmappable	0.182319
48787	2	238600001	238610000	0.00983175	1	0	75ce1bd6dbaf2d4ca50f51e6c1f2a09f3275b080539a07ac7ed962ae72c5179f	CN unmappable	0.19831
55131	3	58840001	58850000	0.0238839	1	0	75ce1bd6dbaf2d4ca50f51e6c1f2a09f3275b080539a07ac7ed962ae72c5179f	CN unmappable	0.309088
55946	3	66990001	67000000	0.0128082	0	1	75ce1bd6dbaf2d4ca50f51e6c1f2a09f3275b080539a07ac7ed962ae72c5179f	junction unmappable	0.226347
63260	3	140130001	140140000	0.0342735	1	0	75ce1bd6dbaf2d4ca50f51e6c1f2a09f3275b080539a07ac7ed962ae72c5179f	CN unmappable	0.370262
64666	3	154190001	154200000	0.0187526	0	1	75ce1bd6dbaf2d4ca50f51e6c1f2a09f3275b080539a07ac7ed962ae72c5179f	junction unmappable	0.27388
79876	4	108260001	108270000	0.0159394	0	1	75ce1bd6dbaf2d4ca50f51e6c1f2a09f3275b080539a07ac7ed962ae72c5179f	junction unmappable	0.252503
80477	4	114270001	114280000	0.0143545	0	0	75ce1bd6dbaf2d4ca50f51e6c1f2a09f3275b080539a07ac7ed962ae72c5179f	mappable	0.23962
81706	4	126560001	126570000	0.0132438	0	0	75ce1bd6dbaf2d4ca50f51e6c1f2a09f3275b080539a07ac7ed962ae72c5179f	mappable	0.230163
126765	7	33950001	33960000	0.0142442	0	1	75ce1bd6dbaf2d4ca50f51e6c1f2a09f3275b080539a07ac7ed962ae72c5179f	junction unmappable	0.238698
135810	7	124400001	124410000	0.0258617	1	0	75ce1bd6dbaf2d4ca50f51e6c1f2a09f3275b080539a07ac7ed962ae72c5179f	CN unmappable	0.321632
163131	8	83190001	83200000	0.0860068	1	0	75ce1bd6dbaf2d4ca50f51e6c1f2a09f3275b080539a07ac7ed962ae72c5179f	CN unmappable	0.586538
166166	8	113540001	113550000	0.00845345	1	0	75ce1bd6dbaf2d4ca50f51e6c1f2a09f3275b080539a07ac7ed962ae72c5179f	CN unmappable	0.183885
197189	11	640001	650000	0.0191252	0	1	75ce1bd6dbaf2d4ca50f51e6c1f2a09f3275b080539a07ac7ed962ae72c5179f	junction unmappable	0.276588
205453	11	83280001	83290000	0.00968967	1	0	75ce1bd6dbaf2d4ca50f51e6c1f2a09f3275b080539a07ac7ed962ae72c5179f	CN unmappable	0.196872
206044	11	89190001	89200000	0.00505371	0	1	75ce1bd6dbaf2d4ca50f51e6c1f2a09f3275b080539a07ac7ed962ae72c5179f	junction unmappable	0.142179
245429	14	99000001	99010000	0.0217478	0	1	75ce1bd6dbaf2d4ca50f51e6c1f2a09f3275b080539a07ac7ed962ae72c5179f	junction unmappable	0.294943
266872	17	13180001	13190000	0.00832582	0	1	75ce1bd6dbaf2d4ca50f51e6c1f2a09f3275b080539a07ac7ed962ae72c5179f	junction unmappable	0.182492
282466	20	9840001	9850000	4.88215	1	0	75ce1bd6dbaf2d4ca50f51e6c1f2a09f3275b080539a07ac7ed962ae72c5179f	CN unmappable	4.41912
139417	X	1330001	1340000	0.0871327	1	0	75ce1bd6dbaf2d4ca50f51e6c1f2a09f3275b080539a07ac7ed962ae72c5179f	CN unmappable	0.590365
14885	1	148840001	148850000	0.125968	1	0	266-24900-216R-33--266-25063N-67T-BLD	CN unmappable	0.70984
33327	2	84000001	84010000	0.0270324	1	0	266-24900-216R-33--266-25063N-67T-BLD	CN unmappable	0.328831
68971	3	197240001	197250000	0.0680831	1	0	266-24900-216R-33--266-25063N-67T-BLD	CN unmappable	0.521855
95045	5	68790001	68800000	0.0101577	1	0	266-24900-216R-33--266-25063N-67T-BLD	CN unmappable	0.201571
96896	5	87300001	87310000	0.00939041	1	0	266-24900-216R-33--266-25063N-67T-BLD	CN unmappable	0.193808
104317	5	161510001	161520000	0.00879609	0	1	266-24900-216R-33--266-25063N-67T-BLD	junction unmappable	0.187575
108698	6	24400001	24410000	0.0103054	0	1	266-24900-216R-33--266-25063N-67T-BLD	junction unmappable	0.203032
114708	6	84500001	84510000	0.0299146	1	0	266-24900-216R-33--266-25063N-67T-BLD	CN unmappable	0.345917
123350	6	170920001	170930000	1.01066	1	0	266-24900-216R-33--266-25063N-67T-BLD	CN unmappable	2.01063
128738	7	53680001	53690000	0.011158	0	1	266-24900-216R-33--266-25063N-67T-BLD	junction unmappable	0.211263
173405	9	39560001	39570000	15.316	1	0	266-24900-216R-33--266-25063N-67T-BLD	CN unmappable	7.82713
173949	9	45000001	45010000	10.0762	1	0	266-24900-216R-33--266-25063N-67T-BLD	CN unmappable	6.34862
181935	9	124860001	124870000	0.00666596	0	1	266-24900-216R-33--266-25063N-67T-BLD	junction unmappable	0.163291
201737	11	46120001	46130000	0.0179767	0	1	266-24900-216R-33--266-25063N-67T-BLD	junction unmappable	0.268154
211686	12	10600001	10610000	0.00561767	0	1	266-24900-216R-33--266-25063N-67T-BLD	junction unmappable	0.149902
239347	14	38180001	38190000	0.0162813	0	1	266-24900-216R-33--266-25063N-67T-BLD	junction unmappable	0.255196
260046	16	35280001	35290000	0.232183	1	0	266-24900-216R-33--266-25063N-67T-BLD	CN unmappable	0.963708
276319	18	26450001	26460000	0.00620246	0	1	266-24900-216R-33--266-25063N-67T-BLD	junction unmappable	0.157511
295862	19	21390001	21400000	0.0206585	0	1	266-24900-216R-33--266-25063N-67T-BLD	junction unmappable	0.287461
286527	20	50450001	50460000	0.0095708	0	1	266-24900-216R-33--266-25063N-67T-BLD	junction unmappable	0.195661
15324	1	153230001	153240000	0.014695	1	0	CA-0071	CN unmappable	0.242446
48363	2	234360001	234370000	0.00866094	0	1	CA-0071	junction unmappable	0.186128
76519	4	74690001	74700000	0.00624265	0	1	CA-0071	junction unmappable	0.158021
112484	6	62260001	62270000	0.00622106	0	1	CA-0071	junction unmappable	0.157747
116777	6	105190001	105200000	0.0239837	1	0	CA-0071	CN unmappable	0.309733
124942	7	15720001	15730000	0.00489566	0	0	CA-0071	mappable	0.139938
126885	7	35150001	35160000	0.00915253	1	0	CA-0071	CN unmappable	0.191338
158501	8	36890001	36900000	0.0201538	0	1	CA-0071	junction unmappable	0.283928
163874	8	90620001	90630000	0.00217444	0	1	CA-0071	junction unmappable	0.0932618
167161	8	123490001	123500000	0.0361985	1	0	CA-0071	CN unmappable	0.380518
176098	9	66490001	66500000	0.0448261	1	0	CA-0071	CN unmappable	0.423443
180595	9	111460001	111470000	0.00965544	0	1	CA-0071	junction unmappable	0.196524
185378	10	18070001	18080000	1.153	1	0	CA-0071	CN unmappable	2.14755
190018	10	64470001	64480000	0.0132022	1	0	CA-0071	CN unmappable	0.229802
197805	11	6800001	6810000	0.018232	1	0	CA-0071	CN unmappable	0.270052
197844	11	7190001	7200000	0.00676377	1	0	CA-0071	CN unmappable	0.164484
203039	11	59140001	59150000	0.016087	1	0	CA-0071	CN unmappable	0.253669
263339	16	68210001	68220000	0.00239219	0	1	CA-0071	junction unmappable	0.0978201
279941	18	62670001	62680000	0.0136727	0	1	CA-0071	junction unmappable	0.233861
148583	X	92990001	93000000	0.0179735	0	1	CA-0071	junction unmappable	0.268131
151622	X	123380001	123390000	0.0218637	0	1	CA-0071	junction unmappable	0.295727
10188	1	101870001	101880000	0.0111444	0	1	PR-2621	junction unmappable	0.211134
43808	2	188810001	188820000	0.021087	0	1	PR-2621	junction unmappable	0.290428
52868	3	36210001	36220000	0.00958294	1	0	PR-2621	CN unmappable	0.195785
69764	4	7140001	7150000	0.0162034	0	1	PR-2621	junction unmappable	0.254585
86644	4	175940001	175950000	0.0131819	1	0	PR-2621	CN unmappable	0.229625
107108	6	8500001	8510000	0.00462909	0	1	PR-2621	junction unmappable	0.136075
116632	6	103740001	103750000	0.0689427	1	0	PR-2621	CN unmappable	0.525139
130252	7	68820001	68830000	0.0190969	0	1	PR-2621	junction unmappable	0.276383
197089	10	135180001	135190000	0.00478101	1	0	PR-2621	CN unmappable	0.13829
208599	11	114740001	114750000	0.0226808	0	1	PR-2621	junction unmappable	0.301203
216639	12	60130001	60140000	0.0159313	1	0	PR-2621	CN unmappable	0.252439
217737	12	71110001	71120000	0.00654782	0	1	PR-2621	junction unmappable	0.161837
220257	12	96310001	96320000	0.0217756	1	0	PR-2621	CN unmappable	0.295131
248765	15	25010001	25020000	0.013648	1	0	PR-2621	CN unmappable	0.233649
259799	16	32810001	32820000	86.1397	1	0	PR-2621	CN unmappable	18.5623
262043	16	55250001	55260000	0.00632221	0	0	PR-2621	mappable	0.159025
270261	17	47070001	47080000	0.011456	0	0	PR-2621	mappable	0.214065
277566	18	38920001	38930000	0.0492789	1	0	PR-2621	CN unmappable	0.443977
281127	18	74530001	74540000	2.34865	0	1	PR-2621	junction unmappable	3.06506
150214	X	109300001	109310000	0.0225023	0	1	PR-2621	junction unmappable	0.300015
152072	X	127880001	127890000	0.0173657	1	0	PR-2621	CN unmappable	0.263558
154346	X	150620001	150630000	0.0135604	0	1	PR-2621	junction unmappable	0.232898
14827	1	148260001	148270000	39.9145	1	0	b095be882857633de948faf0619072298aa64461fd058af02352f8961c273320.2	CN unmappable	12.6356
34098	2	91710001	91720000	0.108559	1	0	b095be882857633de948faf0619072298aa64461fd058af02352f8961c273320.2	CN unmappable	0.658965
38586	2	136590001	136600000	0.0109955	1	0	b095be882857633de948faf0619072298aa64461fd058af02352f8961c273320.2	CN unmappable	0.209719
54662	3	54150001	54160000	0.0110625	0	1	b095be882857633de948faf0619072298aa64461fd058af02352f8961c273320.2	junction unmappable	0.210357
62094	3	128470001	128480000	0.0127343	0	1	b095be882857633de948faf0619072298aa64461fd058af02352f8961c273320.2	junction unmappable	0.225693
86651	4	176010001	176020000	0.0103417	0	1	b095be882857633de948faf0619072298aa64461fd058af02352f8961c273320.2	junction unmappable	0.203388
90625	5	24590001	24600000	0.00986497	0	0	b095be882857633de948faf0619072298aa64461fd058af02352f8961c273320.2	mappable	0.198645
97823	5	96570001	96580000	0.00980846	1	0	b095be882857633de948faf0619072298aa64461fd058af02352f8961c273320.2	CN unmappable	0.198075
105028	5	168620001	168630000	0.0134168	0	1	b095be882857633de948faf0619072298aa64461fd058af02352f8961c273320.2	junction unmappable	0.231662
123922	7	5520001	5530000	0.0215187	1	0	b095be882857633de948faf0619072298aa64461fd058af02352f8961c273320.2	CN unmappable	0.293385
126093	7	27230001	27240000	0.00495755	0	0	b095be882857633de948faf0619072298aa64461fd058af02352f8961c273320.2	mappable	0.14082
135192	7	118220001	118230000	0.00539612	0	1	b095be882857633de948faf0619072298aa64461fd058af02352f8961c273320.2	junction unmappable	0.146917
159006	8	41940001	41950000	0.00938926	0	1	b095be882857633de948faf0619072298aa64461fd058af02352f8961c273320.2	junction unmappable	0.193796
161268	8	64560001	64570000	0.0086294	0	1	b095be882857633de948faf0619072298aa64461fd058af02352f8961c273320.2	junction unmappable	0.185789
188935	10	53640001	53650000	0.0110655	0	1	b095be882857633de948faf0619072298aa64461fd058af02352f8961c273320.2	junction unmappable	0.210385
218431	12	78050001	78060000	0.027418	1	0	b095be882857633de948faf0619072298aa64461fd058af02352f8961c273320.2	CN unmappable	0.331168
238660	14	31310001	31320000	0.00806756	0	1	b095be882857633de948faf0619072298aa64461fd058af02352f8961c273320.2	junction unmappable	0.179639
242575	14	70460001	70470000	0.0116535	0	0	b095be882857633de948faf0619072298aa64461fd058af02352f8961c273320.2	mappable	0.215902
295002	19	12790001	12800000	0.00605469	0	1	b095be882857633de948faf0619072298aa64461fd058af02352f8961c273320.2	junction unmappable	0.155624
284051	20	25690001	25700000	0.00900903	1	0	b095be882857633de948faf0619072298aa64461fd058af02352f8961c273320.2	CN unmappable	0.189832
306201	21	14340001	14350000	0.0146434	1	0	b095be882857633de948faf0619072298aa64461fd058af02352f8961c273320.2	CN unmappable	0.24202
301269	22	16330001	16340000	0.602681	1	0	b095be882857633de948faf0619072298aa64461fd058af02352f8961c273320.2	CN unmappable	1.55265
57335	3	80880001	80890000	0.0207493	1	0	PM677-Z16-1	CN unmappable	0.288093
66542	3	172950001	172960000	0.0178494	1	0	PM677-Z16-1	CN unmappable	0.267204
70360	4	13100001	13110000	0.00805452	0	1	PM677-Z16-1	junction unmappable	0.179494
76504	4	74540001	74550000	0.00833324	0	1	PM677-Z16-1	junction unmappable	0.182573
99208	5	110420001	110430000	0.0233151	1	0	PM677-Z16-1	CN unmappable	0.305386
104687	5	165210001	165220000	0.00927327	0	1	PM677-Z16-1	junction unmappable	0.192596
124670	7	13000001	13010000	0.00561538	0	0	PM677-Z16-1	mappable	0.149872
129081	7	57110001	57120000	33.4834	1	0	PM677-Z16-1	CN unmappable	11.573
176972	9	75230001	75240000	0.0198447	0	1	PM677-Z16-1	junction unmappable	0.281743
189798	10	62270001	62280000	0.00198274	0	1	PM677-Z16-1	junction unmappable	0.0890559
194898	10	113270001	113280000	0.00726761	0	1	PM677-Z16-1	junction unmappable	0.170501
197346	11	2210001	2220000	0.0063692	1	0	PM677-Z16-1	CN unmappable	0.159615
200445	11	33200001	33210000	0.0172774	0	1	PM677-Z16-1	junction unmappable	0.262887
203420	11	62950001	62960000	0.00572337	1	0	PM677-Z16-1	CN unmappable	0.151306
217449	12	68230001	68240000	0.0288052	1	0	PM677-Z16-1	CN unmappable	0.339442
241177	14	56480001	56490000	0.0123278	1	0	PM677-Z16-1	CN unmappable	0.222061
242529	14	70000001	70010000	0.0156159	0	1	PM677-Z16-1	junction unmappable	0.249927
254730	15	84660001	84670000	0.00990976	0	1	PM677-Z16-1	junction unmappable	0.199096
257777	16	12590001	12600000	0.00581815	0	1	PM677-Z16-1	junction unmappable	0.152554
299249	19	55260001	55270000	0.0331609	1	0	PM677-Z16-1	CN unmappable	0.364203
153331	X	140470001	140480000	0.00788651	1	0	PM677-Z16-1	CN unmappable	0.177612
33712	2	87850001	87860000	2.61738	1	0	954-24205-298T-35--954-25048N-259T-BLD	CN unmappable	3.23566
38423	2	134960001	134970000	65.8682	1	0	954-24205-298T-35--954-25048N-259T-BLD	CN unmappable	16.2318
67133	3	178860001	178870000	0.014081	0	1	954-24205-298T-35--954-25048N-259T-BLD	junction unmappable	0.237327
98650	5	104840001	104850000	0.0208887	1	0	954-24205-298T-35--954-25048N-259T-BLD	CN unmappable	0.289059
115559	6	93010001	93020000	0.013179	0	1	954-24205-298T-35--954-25048N-259T-BLD	junction unmappable	0.2296
128436	7	50660001	50670000	0.0141522	0	1	954-24205-298T-35--954-25048N-259T-BLD	junction unmappable	0.237926
133587	7	102170001	102180000	2.83129	1	0	954-24205-298T-35--954-25048N-259T-BLD	CN unmappable	3.36529
159115	8	43030001	43040000	0.00877304	1	0	954-24205-298T-35--954-25048N-259T-BLD	CN unmappable	0.187329
200227	11	31020001	31030000	0.00641177	0	1	954-24205-298T-35--954-25048N-259T-BLD	junction unmappable	0.160147
207430	11	103050001	103060000	0.0100139	0	0	954-24205-298T-35--954-25048N-259T-BLD	mappable	0.200139
230373	13	63610001	63620000	0.0315539	1	0	954-24205-298T-35--954-25048N-259T-BLD	CN unmappable	0.355268
230776	13	67640001	67650000	0.0106071	0	1	954-24205-298T-35--954-25048N-259T-BLD	junction unmappable	0.205981
245458	14	99290001	99300000	0.00490087	0	1	954-24205-298T-35--954-25048N-259T-BLD	junction unmappable	0.140012
245961	14	104320001	104330000	0.0161191	1	0	954-24205-298T-35--954-25048N-259T-BLD	CN unmappable	0.253922
259546	16	30280001	30290000	595.085	1	0	954-24205-298T-35--954-25048N-259T-BLD	CN unmappable	48.7887
275725	18	20510001	20520000	0.0123145	0	1	954-24205-298T-35--954-25048N-259T-BLD	junction unmappable	0.221941
297177	19	34540001	34550000	0.0101371	0	1	954-24205-298T-35--954-25048N-259T-BLD	junction unmappable	0.201367
298039	19	43160001	43170000	0.634186	1	0	954-24205-298T-35--954-25048N-259T-BLD	CN unmappable	1.59272
298943	19	52200001	52210000	0.0164387	0	1	954-24205-298T-35--954-25048N-259T-BLD	junction unmappable	0.256427
151994	X	127100001	127110000	0.00852648	0	1	954-24205-298T-35--954-25048N-259T-BLD	junction unmappable	0.184678
5329	1	53280001	53290000	0.0227149	1	0	MELA_0046	CN unmappable	0.301429
9674	1	96730001	96740000	0.0224864	1	0	MELA_0046	CN unmappable	0.299909
33741	2	88140001	88150000	0.023869	1	0	MELA_0046	CN unmappable	0.308992
34684	2	97570001	97580000	0.0111978	1	0	MELA_0046	CN unmappable	0.211639
40790	2	158630001	158640000	0.0100921	0	1	MELA_0046	junction unmappable	0.200919
60660	3	114130001	114140000	0.00430753	0	0	MELA_0046	mappable	0.131264
79071	4	100210001	100220000	0.00619164	0	1	MELA_0046	junction unmappable	0.157374
81088	4	120380001	120390000	0.011588	1	0	MELA_0046	CN unmappable	0.215296
81609	4	125590001	125600000	0.00990515	0	0	MELA_0046	mappable	0.199049
100531	5	123650001	123660000	0.00241209	0	1	MELA_0046	junction unmappable	0.0982262
113650	6	73920001	73930000	0.0126783	1	0	MELA_0046	CN unmappable	0.225196
162085	8	72730001	72740000	0.00849531	1	0	MELA_0046	CN unmappable	0.18434
171296	9	18470001	18480000	0.00956747	0	0	MELA_0046	mappable	0.195627
171911	9	24620001	24630000	0.00883468	0	1	MELA_0046	junction unmappable	0.187986
214608	12	39820001	39830000	0.0199087	0	1	MELA_0046	junction unmappable	0.282197
234121	13	101090001	101100000	0.0111424	1	0	MELA_0046	CN unmappable	0.211115
242062	14	65330001	65340000	0.0131129	0	1	MELA_0046	junction unmappable	0.229023
265403	16	88850001	88860000	0.0334179	1	0	MELA_0046	CN unmappable	0.365611
278234	18	45600001	45610000	0.00957468	0	1	MELA_0046	junction unmappable	0.195701
285061	20	35790001	35800000	0.00484789	0	1	MELA_0046	junction unmappable	0.139254
302339	22	27030001	27040000	0.0093052	0	1	MELA_0046	junction unmappable	0.192927
146379	X	70950001	70960000	14.8298	1	0	MELA_0046	CN unmappable	7.7019
149503	X	102190001	102200000	0.0119696	0	1	MELA_0046	junction unmappable	0.218812
273	1	2720001	2730000	0.00403263	0	1	6e6ffd2fababfb900f63401a704f75dd8edd7e063f826d6da01789aa2df983d6	junction unmappable	0.127006
14983	1	149820001	149830000	5.71167	1	0	6e6ffd2fababfb900f63401a704f75dd8edd7e063f826d6da01789aa2df983d6	CN unmappable	4.77982
26114	2	11870001	11880000	0.00798687	0	1	6e6ffd2fababfb900f63401a704f75dd8edd7e063f826d6da01789aa2df983d6	junction unmappable	0.178739
32817	2	78900001	78910000	0.0118672	0	1	6e6ffd2fababfb900f63401a704f75dd8edd7e063f826d6da01789aa2df983d6	junction unmappable	0.217874
45342	2	204150001	204160000	0.00882308	0	1	6e6ffd2fababfb900f63401a704f75dd8edd7e063f826d6da01789aa2df983d6	junction unmappable	0.187863
45988	2	210610001	210620000	0.0128457	1	0	6e6ffd2fababfb900f63401a704f75dd8edd7e063f826d6da01789aa2df983d6	CN unmappable	0.226678
50222	3	9750001	9760000	0.00941148	0	1	6e6ffd2fababfb900f63401a704f75dd8edd7e063f826d6da01789aa2df983d6	junction unmappable	0.194026
52524	3	32770001	32780000	0.00704782	0	1	6e6ffd2fababfb900f63401a704f75dd8edd7e063f826d6da01789aa2df983d6	junction unmappable	0.167903
61851	3	126040001	126050000	3.41848	1	0	6e6ffd2fababfb900f63401a704f75dd8edd7e063f826d6da01789aa2df983d6	CN unmappable	3.69782
62785	3	135380001	135390000	0.0433064	1	0	6e6ffd2fababfb900f63401a704f75dd8edd7e063f826d6da01789aa2df983d6	CN unmappable	0.416204
98112	5	99460001	99470000	0.00689424	0	1	6e6ffd2fababfb900f63401a704f75dd8edd7e063f826d6da01789aa2df983d6	junction unmappable	0.166063
131174	7	78040001	78050000	0.0101148	0	0	6e6ffd2fababfb900f63401a704f75dd8edd7e063f826d6da01789aa2df983d6	mappable	0.201145
137257	7	138870001	138880000	0.0145678	0	1	6e6ffd2fababfb900f63401a704f75dd8edd7e063f826d6da01789aa2df983d6	junction unmappable	0.241395
176329	9	68800001	68810000	0.0161632	1	0	6e6ffd2fababfb900f63401a704f75dd8edd7e063f826d6da01789aa2df983d6	CN unmappable	0.254269
192298	10	87270001	87280000	0.0237593	1	0	6e6ffd2fababfb900f63401a704f75dd8edd7e063f826d6da01789aa2df983d6	CN unmappable	0.308281
212931	12	23050001	23060000	0.00602968	0	1	6e6ffd2fababfb900f63401a704f75dd8edd7e063f826d6da01789aa2df983d6	junction unmappable	0.155302
235205	13	111930001	111940000	0.022787	0	0	6e6ffd2fababfb900f63401a704f75dd8edd7e063f826d6da01789aa2df983d6	mappable	0.301907
240567	14	50380001	50390000	0.0127201	1	0	6e6ffd2fababfb900f63401a704f75dd8edd7e063f826d6da01789aa2df983d6	CN unmappable	0.225567
253133	15	68690001	68700000	0.0352016	1	0	6e6ffd2fababfb900f63401a704f75dd8edd7e063f826d6da01789aa2df983d6	CN unmappable	0.375242
274608	18	9340001	9350000	0.0103083	0	1	6e6ffd2fababfb900f63401a704f75dd8edd7e063f826d6da01789aa2df983d6	junction unmappable	0.20306
295322	19	15990001	16000000	0.00724724	1	0	6e6ffd2fababfb900f63401a704f75dd8edd7e063f826d6da01789aa2df983d6	CN unmappable	0.170261
144494	X	52100001	52110000	0.813615	1	0	6e6ffd2fababfb900f63401a704f75dd8edd7e063f826d6da01789aa2df983d6	CN unmappable	1.80401
48227	2	233000001	233010000	0.0213336	0	0	2e9faf28897dce9dfd86c06101eeb7398f945036f13b5f9d78dd02e113ca9ba0	mappable	0.292121
54601	3	53540001	53550000	0.0125198	0	1	2e9faf28897dce9dfd86c06101eeb7398f945036f13b5f9d78dd02e113ca9ba0	junction unmappable	0.223784
61479	3	122320001	122330000	0.0126667	0	1	2e9faf28897dce9dfd86c06101eeb7398f945036f13b5f9d78dd02e113ca9ba0	junction unmappable	0.225093
75945	4	68950001	68960000	0.0109383	1	0	2e9faf28897dce9dfd86c06101eeb7398f945036f13b5f9d78dd02e113ca9ba0	CN unmappable	0.209173
78683	4	96330001	96340000	0.00508451	0	0	2e9faf28897dce9dfd86c06101eeb7398f945036f13b5f9d78dd02e113ca9ba0	mappable	0.142611
87712	4	186620001	186630000	0.0104801	0	1	2e9faf28897dce9dfd86c06101eeb7398f945036f13b5f9d78dd02e113ca9ba0	junction unmappable	0.204745
95999	5	78330001	78340000	0.0160801	0	1	2e9faf28897dce9dfd86c06101eeb7398f945036f13b5f9d78dd02e113ca9ba0	junction unmappable	0.253615
101472	5	133060001	133070000	0.0085461	0	0	2e9faf28897dce9dfd86c06101eeb7398f945036f13b5f9d78dd02e113ca9ba0	mappable	0.18489
116556	6	102980001	102990000	0.0193673	1	0	2e9faf28897dce9dfd86c06101eeb7398f945036f13b5f9d78dd02e113ca9ba0	CN unmappable	0.278333
131416	7	80460001	80470000	0.0169219	0	1	2e9faf28897dce9dfd86c06101eeb7398f945036f13b5f9d78dd02e113ca9ba0	junction unmappable	0.260168
154924	8	1120001	1130000	0.013465	1	0	2e9faf28897dce9dfd86c06101eeb7398f945036f13b5f9d78dd02e113ca9ba0	CN unmappable	0.232077
176274	9	68250001	68260000	0.10443	1	0	2e9faf28897dce9dfd86c06101eeb7398f945036f13b5f9d78dd02e113ca9ba0	CN unmappable	0.646314
222405	12	117790001	117800000	0.0191021	1	0	2e9faf28897dce9dfd86c06101eeb7398f945036f13b5f9d78dd02e113ca9ba0	CN unmappable	0.276421
222901	12	122750001	122760000	0.0123377	0	1	2e9faf28897dce9dfd86c06101eeb7398f945036f13b5f9d78dd02e113ca9ba0	junction unmappable	0.22215
249545	15	32810001	32820000	0.0838391	1	0	2e9faf28897dce9dfd86c06101eeb7398f945036f13b5f9d78dd02e113ca9ba0	CN unmappable	0.579099
250359	15	40950001	40960000	0.0137128	0	1	2e9faf28897dce9dfd86c06101eeb7398f945036f13b5f9d78dd02e113ca9ba0	junction unmappable	0.234203
251057	15	47930001	47940000	0.021103	0	0	2e9faf28897dce9dfd86c06101eeb7398f945036f13b5f9d78dd02e113ca9ba0	mappable	0.290537
263248	16	67300001	67310000	0.0105692	0	1	2e9faf28897dce9dfd86c06101eeb7398f945036f13b5f9d78dd02e113ca9ba0	junction unmappable	0.205613
294934	19	12110001	12120000	0.0324551	1	0	2e9faf28897dce9dfd86c06101eeb7398f945036f13b5f9d78dd02e113ca9ba0	CN unmappable	0.360306
303891	22	42550001	42560000	0.00927527	0	1	2e9faf28897dce9dfd86c06101eeb7398f945036f13b5f9d78dd02e113ca9ba0	junction unmappable	0.192616
146684	X	74000001	74010000	0.0273103	1	0	2e9faf28897dce9dfd86c06101eeb7398f945036f13b5f9d78dd02e113ca9ba0	CN unmappable	0.330517
151135	X	118510001	118520000	0.014562	0	1	2e9faf28897dce9dfd86c06101eeb7398f945036f13b5f9d78dd02e113ca9ba0	junction unmappable	0.241346
26193	2	12660001	12670000	1.05502	1	0	4f47f6288df7369b28f5c8b57440ea1196b2d92fca571abc1c83c18062924dc3	CN unmappable	2.05428
58116	3	88690001	88700000	0.0077702	1	0	4f47f6288df7369b28f5c8b57440ea1196b2d92fca571abc1c83c18062924dc3	CN unmappable	0.176298
64207	3	149600001	149610000	0.0127434	0	1	4f47f6288df7369b28f5c8b57440ea1196b2d92fca571abc1c83c18062924dc3	junction unmappable	0.225774
64322	3	150750001	150760000	0.00880136	0	1	4f47f6288df7369b28f5c8b57440ea1196b2d92fca571abc1c83c18062924dc3	junction unmappable	0.187631
75983	4	69330001	69340000	0.0120449	0	0	4f47f6288df7369b28f5c8b57440ea1196b2d92fca571abc1c83c18062924dc3	mappable	0.219498
77737	4	86870001	86880000	0.0206436	0	1	4f47f6288df7369b28f5c8b57440ea1196b2d92fca571abc1c83c18062924dc3	junction unmappable	0.287358
77862	4	88120001	88130000	0.0131433	0	1	4f47f6288df7369b28f5c8b57440ea1196b2d92fca571abc1c83c18062924dc3	junction unmappable	0.229288
79778	4	107280001	107290000	0.0149574	0	0	4f47f6288df7369b28f5c8b57440ea1196b2d92fca571abc1c83c18062924dc3	mappable	0.244601
98256	5	100900001	100910000	0.00609299	1	0	4f47f6288df7369b28f5c8b57440ea1196b2d92fca571abc1c83c18062924dc3	CN unmappable	0.156115
110681	6	44230001	44240000	0.00890605	0	1	4f47f6288df7369b28f5c8b57440ea1196b2d92fca571abc1c83c18062924dc3	junction unmappable	0.188744
131092	7	77220001	77230000	0.0142043	0	1	4f47f6288df7369b28f5c8b57440ea1196b2d92fca571abc1c83c18062924dc3	junction unmappable	0.238364
135161	7	117910001	117920000	0.00709534	0	1	4f47f6288df7369b28f5c8b57440ea1196b2d92fca571abc1c83c18062924dc3	junction unmappable	0.168468
173785	9	43360001	43370000	14.6494	1	0	4f47f6288df7369b28f5c8b57440ea1196b2d92fca571abc1c83c18062924dc3	CN unmappable	7.6549
180503	9	110540001	110550000	3.12951	1	0	4f47f6288df7369b28f5c8b57440ea1196b2d92fca571abc1c83c18062924dc3	CN unmappable	3.53809
183562	9	141130001	141140000	49.0809	1	0	4f47f6288df7369b28f5c8b57440ea1196b2d92fca571abc1c83c18062924dc3	CN unmappable	14.0116
188397	10	48260001	48270000	36.6948	1	0	4f47f6288df7369b28f5c8b57440ea1196b2d92fca571abc1c83c18062924dc3	CN unmappable	12.1152
227691	13	36790001	36800000	0.00847332	0	1	4f47f6288df7369b28f5c8b57440ea1196b2d92fca571abc1c83c18062924dc3	junction unmappable	0.184101
243050	14	75210001	75220000	0.0106669	0	1	4f47f6288df7369b28f5c8b57440ea1196b2d92fca571abc1c83c18062924dc3	junction unmappable	0.206561
305719	21	9520001	9530000	93.7688	1	0	4f47f6288df7369b28f5c8b57440ea1196b2d92fca571abc1c83c18062924dc3	CN unmappable	19.3669
303533	22	38970001	38980000	0.0167633	0	1	4f47f6288df7369b28f5c8b57440ea1196b2d92fca571abc1c83c18062924dc3	junction unmappable	0.258946
141017	X	17330001	17340000	0.0248077	1	0	4f47f6288df7369b28f5c8b57440ea1196b2d92fca571abc1c83c18062924dc3	CN unmappable	0.315009
143518	X	42340001	42350000	0.0127971	0	0	4f47f6288df7369b28f5c8b57440ea1196b2d92fca571abc1c83c18062924dc3	mappable	0.226249
4370	1	43690001	43700000	0.014308	0	1	1791449d2f01848f0d916bf0fe0ea5bbd445cac09cb4cfbb612f884153fc0297	junction unmappable	0.239233
26597	2	16700001	16710000	0.00750853	0	1	1791449d2f01848f0d916bf0fe0ea5bbd445cac09cb4cfbb612f884153fc0297	junction unmappable	0.173304
34461	2	95340001	95350000	0.00911115	1	0	1791449d2f01848f0d916bf0fe0ea5bbd445cac09cb4cfbb612f884153fc0297	CN unmappable	0.190905
58153	3	89060001	89070000	0.00688629	0	1	1791449d2f01848f0d916bf0fe0ea5bbd445cac09cb4cfbb612f884153fc0297	junction unmappable	0.165967
120409	6	141510001	141520000	0.015385	0	1	1791449d2f01848f0d916bf0fe0ea5bbd445cac09cb4cfbb612f884153fc0297	junction unmappable	0.248073
123163	6	169050001	169060000	0.366936	1	0	1791449d2f01848f0d916bf0fe0ea5bbd445cac09cb4cfbb612f884153fc0297	CN unmappable	1.2115
157465	8	26530001	26540000	0.0304757	1	0	1791449d2f01848f0d916bf0fe0ea5bbd445cac09cb4cfbb612f884153fc0297	CN unmappable	0.349146
160282	8	54700001	54710000	0.00449137	0	1	1791449d2f01848f0d916bf0fe0ea5bbd445cac09cb4cfbb612f884153fc0297	junction unmappable	0.134035
162341	8	75290001	75300000	0.0115066	0	1	1791449d2f01848f0d916bf0fe0ea5bbd445cac09cb4cfbb612f884153fc0297	junction unmappable	0.214537
168127	8	133150001	133160000	0.00955541	0	1	1791449d2f01848f0d916bf0fe0ea5bbd445cac09cb4cfbb612f884153fc0297	junction unmappable	0.195504
174148	9	46990001	47000000	45.194	1	0	1791449d2f01848f0d916bf0fe0ea5bbd445cac09cb4cfbb612f884153fc0297	CN unmappable	13.4453
181456	9	120070001	120080000	0.0271884	0	0	1791449d2f01848f0d916bf0fe0ea5bbd445cac09cb4cfbb612f884153fc0297	mappable	0.329778
192493	10	89220001	89230000	1.01716	1	0	1791449d2f01848f0d916bf0fe0ea5bbd445cac09cb4cfbb612f884153fc0297	CN unmappable	2.01708
197411	11	2860001	2870000	0.0295226	0	0	1791449d2f01848f0d916bf0fe0ea5bbd445cac09cb4cfbb612f884153fc0297	mappable	0.343643
197554	11	4290001	4300000	1.23854	1	0	1791449d2f01848f0d916bf0fe0ea5bbd445cac09cb4cfbb612f884153fc0297	CN unmappable	2.2258
215610	12	49840001	49850000	0.00780621	0	1	1791449d2f01848f0d916bf0fe0ea5bbd445cac09cb4cfbb612f884153fc0297	junction unmappable	0.176705
218574	12	79480001	79490000	0.0141699	0	1	1791449d2f01848f0d916bf0fe0ea5bbd445cac09cb4cfbb612f884153fc0297	junction unmappable	0.238075
239030	14	35010001	35020000	47.4776	1	0	1791449d2f01848f0d916bf0fe0ea5bbd445cac09cb4cfbb612f884153fc0297	CN unmappable	13.7808
249221	15	29570001	29580000	0.00741343	0	1	1791449d2f01848f0d916bf0fe0ea5bbd445cac09cb4cfbb612f884153fc0297	junction unmappable	0.172203
306275	21	15080001	15090000	12.8853	1	0	1791449d2f01848f0d916bf0fe0ea5bbd445cac09cb4cfbb612f884153fc0297	CN unmappable	7.17922
142393	X	31090001	31100000	0.026498	1	0	1791449d2f01848f0d916bf0fe0ea5bbd445cac09cb4cfbb612f884153fc0297	CN unmappable	0.325564
153906	X	146220001	146230000	0.0229916	1	0	1791449d2f01848f0d916bf0fe0ea5bbd445cac09cb4cfbb612f884153fc0297	CN unmappable	0.303259
5885	1	58840001	58850000	0.034486	1	0	4899	CN unmappable	0.371408
16589	1	165880001	165890000	0.0110764	0	1	4899	junction unmappable	0.210489
19883	1	198820001	198830000	0.0075321	0	1	4899	junction unmappable	0.173575
24819	1	248180001	248190000	0.0175257	1	0	4899	CN unmappable	0.264769
35636	2	107090001	107100000	0.00793433	1	0	4899	CN unmappable	0.17815
41419	2	164920001	164930000	0.0221479	1	0	4899	CN unmappable	0.297644
49381	3	1340001	1350000	0.00480448	0	1	4899	junction unmappable	0.138629
58266	3	90190001	90200000	0.026749	0	1	4899	junction unmappable	0.327102
63800	3	145530001	145540000	0.00639428	1	0	4899	CN unmappable	0.159928
65999	3	167520001	167530000	0.0254828	1	0	4899	CN unmappable	0.319267
66053	3	168060001	168070000	0.00889892	1	0	4899	CN unmappable	0.188668
96484	5	83180001	83190000	0.0114958	0	1	4899	junction unmappable	0.214437
106386	6	1280001	1290000	0.0266957	0	0	4899	mappable	0.326776
168747	8	139350001	139360000	0.0123853	1	0	4899	CN unmappable	0.222579
192364	10	87930001	87940000	0.00976807	1	0	4899	CN unmappable	0.197667
230835	13	68230001	68240000	0.0170617	0	0	4899	mappable	0.261241
243403	14	78740001	78750000	0.00570485	0	1	4899	junction unmappable	0.151061
264595	16	80770001	80780000	0.0110793	0	1	4899	junction unmappable	0.210517
268835	17	32810001	32820000	0.0111078	0	0	4899	mappable	0.210787
269368	17	38140001	38150000	0.00679961	0	1	4899	junction unmappable	0.164919
294250	19	5270001	5280000	0.0188472	0	1	4899	junction unmappable	0.27457
286934	20	54520001	54530000	0.014652	1	0	4899	CN unmappable	0.242091
152184	X	129000001	129010000	0.0118712	0	1	4899	junction unmappable	0.21791
44958	2	200310001	200320000	0.0102813	0	0	6984	mappable	0.202793
46994	2	220670001	220680000	0.0229804	1	0	6984	CN unmappable	0.303186
47723	2	227960001	227970000	0.00980136	1	0	6984	CN unmappable	0.198004
81407	4	123570001	123580000	45.2384	1	0	6984	CN unmappable	13.4519
82200	4	131500001	131510000	0.0241652	0	1	6984	junction unmappable	0.310903
85818	4	167680001	167690000	1.23166	1	0	6984	CN unmappable	2.2196
104064	5	158980001	158990000	0.00857157	0	0	6984	mappable	0.185166
105948	5	177820001	177830000	11.242	1	0	6984	CN unmappable	6.70581
130725	7	73550001	73560000	0.0961749	1	0	6984	CN unmappable	0.620242
135679	7	123090001	123100000	0.021656	0	1	6984	junction unmappable	0.294319
154885	8	730001	740000	0.0147802	1	0	6984	CN unmappable	0.243148
174177	9	47280001	47290000	10.9561	1	0	6984	CN unmappable	6.62001
181285	9	118360001	118370000	0.0172438	0	1	6984	junction unmappable	0.262631
182282	9	128330001	128340000	0.0182554	1	0	6984	CN unmappable	0.270225
182607	9	131580001	131590000	0.0155486	0	1	6984	junction unmappable	0.249388
183373	9	139240001	139250000	0.00771164	1	0	6984	CN unmappable	0.175632
193045	10	94740001	94750000	0.0164782	0	1	6984	junction unmappable	0.256735
238651	14	31220001	31230000	0.00787703	0	1	6984	junction unmappable	0.177505
294824	19	11010001	11020000	0.00755425	0	1	6984	junction unmappable	0.17383
285266	20	37840001	37850000	0.00496076	0	1	6984	junction unmappable	0.140865
309497	21	47300001	47310000	0.0140023	0	1	6984	junction unmappable	0.236663
301346	22	17100001	17110000	0.00597122	0	1	6984	junction unmappable	0.154547
24177	1	241760001	241770000	0.00857613	0	1	4878	junction unmappable	0.185215
38394	2	134670001	134680000	0.0124053	1	0	4878	CN unmappable	0.222758
75585	4	65350001	65360000	0.0130693	0	1	4878	junction unmappable	0.228642
75589	4	65390001	65400000	0.00654468	0	1	4878	junction unmappable	0.161798
76630	4	75800001	75810000	0.00811845	0	1	4878	junction unmappable	0.180205
82720	4	136700001	136710000	0.0254105	0	0	4878	mappable	0.318813
83452	4	144020001	144030000	7.68704	1	0	4878	CN unmappable	5.5451
89628	5	14620001	14630000	0.00382372	0	1	4878	junction unmappable	0.123673
186619	10	30480001	30490000	0.00797134	0	1	4878	junction unmappable	0.178565
206732	11	96070001	96080000	0.0320629	1	0	4878	CN unmappable	0.358122
228039	13	40270001	40280000	0.0120409	0	1	4878	junction unmappable	0.219462
241957	14	64280001	64290000	0.0103844	1	0	4878	CN unmappable	0.203808
279645	18	59710001	59720000	0.0150896	1	0	4878	CN unmappable	0.24568
296765	19	30420001	30430000	0.0113409	0	1	4878	junction unmappable	0.212987
304760	22	51240001	51250000	10.2413	1	0	4878	CN unmappable	6.40041
149085	X	98010001	98020000	0.012132	0	1	4878	junction unmappable	0.22029
149532	X	102480001	102490000	0.00571328	0	1	4878	junction unmappable	0.151173
149614	X	103300001	103310000	7.61034	1	0	4878	CN unmappable	5.51737
154476	X	151920001	151930000	47.3375	1	0	4878	CN unmappable	13.7604
39375	2	144480001	144490000	0.0114953	0	0	bb045204c5ffa7051c634c2e95e79c1cd747e7ef90f17f0028c79e8e43d17a9b	mappable	0.214432
80350	4	113000001	113010000	0.0167977	1	0	bb045204c5ffa7051c634c2e95e79c1cd747e7ef90f17f0028c79e8e43d17a9b	CN unmappable	0.259212
87378	4	183280001	183290000	0.0280972	1	0	bb045204c5ffa7051c634c2e95e79c1cd747e7ef90f17f0028c79e8e43d17a9b	CN unmappable	0.335244
97076	5	89100001	89110000	0.0149017	1	0	bb045204c5ffa7051c634c2e95e79c1cd747e7ef90f17f0028c79e8e43d17a9b	CN unmappable	0.244145
111169	6	49110001	49120000	0.0124249	0	1	bb045204c5ffa7051c634c2e95e79c1cd747e7ef90f17f0028c79e8e43d17a9b	junction unmappable	0.222934
125453	7	20830001	20840000	0.0187575	0	1	bb045204c5ffa7051c634c2e95e79c1cd747e7ef90f17f0028c79e8e43d17a9b	junction unmappable	0.273916
130542	7	71720001	71730000	0.0122556	0	1	bb045204c5ffa7051c634c2e95e79c1cd747e7ef90f17f0028c79e8e43d17a9b	junction unmappable	0.22141
132735	7	93650001	93660000	0.0111422	0	1	bb045204c5ffa7051c634c2e95e79c1cd747e7ef90f17f0028c79e8e43d17a9b	junction unmappable	0.211113
134625	7	112550001	112560000	0.0105504	1	0	bb045204c5ffa7051c634c2e95e79c1cd747e7ef90f17f0028c79e8e43d17a9b	CN unmappable	0.205431
171895	9	24460001	24470000	0.00319704	0	0	bb045204c5ffa7051c634c2e95e79c1cd747e7ef90f17f0028c79e8e43d17a9b	mappable	0.113085
211807	12	11810001	11820000	0.00868731	0	1	bb045204c5ffa7051c634c2e95e79c1cd747e7ef90f17f0028c79e8e43d17a9b	junction unmappable	0.186412
219821	12	91950001	91960000	0.00961027	0	1	bb045204c5ffa7051c634c2e95e79c1cd747e7ef90f17f0028c79e8e43d17a9b	junction unmappable	0.196064
220241	12	96150001	96160000	0.00713866	0	1	bb045204c5ffa7051c634c2e95e79c1cd747e7ef90f17f0028c79e8e43d17a9b	junction unmappable	0.168981
252078	15	58140001	58150000	0.0121724	0	0	bb045204c5ffa7051c634c2e95e79c1cd747e7ef90f17f0028c79e8e43d17a9b	mappable	0.220657
259775	16	32570001	32580000	0.00334103	1	0	bb045204c5ffa7051c634c2e95e79c1cd747e7ef90f17f0028c79e8e43d17a9b	CN unmappable	0.115603
259804	16	32860001	32870000	179.602	1	0	bb045204c5ffa7051c634c2e95e79c1cd747e7ef90f17f0028c79e8e43d17a9b	CN unmappable	26.8031
259813	16	32950001	32960000	0.0426585	1	0	bb045204c5ffa7051c634c2e95e79c1cd747e7ef90f17f0028c79e8e43d17a9b	CN unmappable	0.413079
274097	18	4230001	4240000	0.0112487	0	1	bb045204c5ffa7051c634c2e95e79c1cd747e7ef90f17f0028c79e8e43d17a9b	junction unmappable	0.212119
281405	18	77310001	77320000	11.1175	1	0	bb045204c5ffa7051c634c2e95e79c1cd747e7ef90f17f0028c79e8e43d17a9b	CN unmappable	6.6686
304228	22	45920001	45930000	0.00329935	0	1	bb045204c5ffa7051c634c2e95e79c1cd747e7ef90f17f0028c79e8e43d17a9b	junction unmappable	0.11488
152565	X	132810001	132820000	0.00961862	0	1	bb045204c5ffa7051c634c2e95e79c1cd747e7ef90f17f0028c79e8e43d17a9b	junction unmappable	0.196149
9	1	80001	90000	0.225492	1	0	4968	CN unmappable	0.94972
637	1	6360001	6370000	0.0180818	1	0	4968	CN unmappable	0.268937
36982	2	120550001	120560000	0.00924749	0	1	4968	junction unmappable	0.192328
56764	3	75170001	75180000	0.013987	1	0	4968	CN unmappable	0.236533
84914	4	158640001	158650000	0.0234652	0	1	4968	junction unmappable	0.306367
92144	5	39780001	39790000	1.39178	1	0	4968	CN unmappable	2.35947
104985	5	168190001	168200000	0.0141184	0	0	4968	mappable	0.237642
124445	7	10750001	10760000	0.0139429	0	1	4968	junction unmappable	0.23616
125826	7	24560001	24570000	0.0175511	0	1	4968	junction unmappable	0.264961
164404	8	95920001	95930000	0.00426587	0	1	4968	junction unmappable	0.130627
169472	9	230001	240000	0.0218171	1	0	4968	CN unmappable	0.295412
179940	9	104910001	104920000	0.0300159	1	0	4968	CN unmappable	0.346502
180503	9	110540001	110550000	3.12951	1	0	4968	CN unmappable	3.53809
217008	12	63820001	63830000	0.00573323	1	0	4968	CN unmappable	0.151436
234043	13	100310001	100320000	0.00588487	0	0	4968	mappable	0.153426
238039	14	25100001	25110000	0.00557258	0	1	4968	junction unmappable	0.149299
240465	14	49360001	49370000	0.0111009	0	0	4968	mappable	0.210721
249208	15	29440001	29450000	0.00656229	0	1	4968	junction unmappable	0.162016
259763	16	32450001	32460000	0.0285246	1	0	4968	CN unmappable	0.337785
141197	X	19130001	19140000	0.00908725	0	1	4968	junction unmappable	0.190654
144341	X	50570001	50580000	0.0105848	0	1	4968	junction unmappable	0.205765
148414	X	91300001	91310000	0.0141564	1	0	4968	CN unmappable	0.237961
149185	X	99010001	99020000	0.0132746	0	1	4968	junction unmappable	0.230431
4897	1	48960001	48970000	0.00545295	0	1	0963f143cc945f2bf680c16240ac6b8d44b6c39c65453f32bc773408db826c31	junction unmappable	0.147688
14668	1	146670001	146680000	0.102413	1	0	0963f143cc945f2bf680c16240ac6b8d44b6c39c65453f32bc773408db826c31	CN unmappable	0.640041
22970	1	229690001	229700000	0.0174909	0	1	0963f143cc945f2bf680c16240ac6b8d44b6c39c65453f32bc773408db826c31	junction unmappable	0.264507
25032	2	1050001	1060000	0.0416972	1	0	0963f143cc945f2bf680c16240ac6b8d44b6c39c65453f32bc773408db826c31	CN unmappable	0.408398
40213	2	152860001	152870000	0.0235663	0	1	0963f143cc945f2bf680c16240ac6b8d44b6c39c65453f32bc773408db826c31	junction unmappable	0.307027
47723	2	227960001	227970000	0.00980136	1	0	0963f143cc945f2bf680c16240ac6b8d44b6c39c65453f32bc773408db826c31	CN unmappable	0.198004
52335	3	30880001	30890000	0.0110031	0	1	0963f143cc945f2bf680c16240ac6b8d44b6c39c65453f32bc773408db826c31	junction unmappable	0.209791
66204	3	169570001	169580000	0.0104488	0	1	0963f143cc945f2bf680c16240ac6b8d44b6c39c65453f32bc773408db826c31	junction unmappable	0.204439
82840	4	137900001	137910000	0.0145039	0	0	0963f143cc945f2bf680c16240ac6b8d44b6c39c65453f32bc773408db826c31	mappable	0.240864
107644	6	13860001	13870000	0.017749	0	1	0963f143cc945f2bf680c16240ac6b8d44b6c39c65453f32bc773408db826c31	junction unmappable	0.266451
134544	7	111740001	111750000	0.00854107	0	1	0963f143cc945f2bf680c16240ac6b8d44b6c39c65453f32bc773408db826c31	junction unmappable	0.184836
188561	10	49900001	49910000	0.00947432	0	0	0963f143cc945f2bf680c16240ac6b8d44b6c39c65453f32bc773408db826c31	mappable	0.194672
233285	13	92730001	92740000	0.00350871	0	1	0963f143cc945f2bf680c16240ac6b8d44b6c39c65453f32bc773408db826c31	junction unmappable	0.118469
233970	13	99580001	99590000	0.0111615	0	1	0963f143cc945f2bf680c16240ac6b8d44b6c39c65453f32bc773408db826c31	junction unmappable	0.211296
244461	14	89320001	89330000	0.00901418	1	0	0963f143cc945f2bf680c16240ac6b8d44b6c39c65453f32bc773408db826c31	CN unmappable	0.189886
258023	16	15050001	15060000	0.00303597	1	0	0963f143cc945f2bf680c16240ac6b8d44b6c39c65453f32bc773408db826c31	CN unmappable	0.110199
258357	16	18390001	18400000	132.043	1	0	0963f143cc945f2bf680c16240ac6b8d44b6c39c65453f32bc773408db826c31	CN unmappable	22.982
267768	17	22140001	22150000	0.00460782	1	0	0963f143cc945f2bf680c16240ac6b8d44b6c39c65453f32bc773408db826c31	CN unmappable	0.135762
294590	19	8670001	8680000	0.0155815	1	0	0963f143cc945f2bf680c16240ac6b8d44b6c39c65453f32bc773408db826c31	CN unmappable	0.249652
286668	20	51860001	51870000	0.00759694	0	1	0963f143cc945f2bf680c16240ac6b8d44b6c39c65453f32bc773408db826c31	junction unmappable	0.174321
301811	22	21750001	21760000	61.8932	1	0	0963f143cc945f2bf680c16240ac6b8d44b6c39c65453f32bc773408db826c31	CN unmappable	15.7344
303725	22	40890001	40900000	0.118067	1	0	0963f143cc945f2bf680c16240ac6b8d44b6c39c65453f32bc773408db826c31	CN unmappable	0.687217
7747	1	77460001	77470000	0.0318691	1	0	5415	CN unmappable	0.357039
15122	1	151210001	151220000	0.0143474	0	1	5415	junction unmappable	0.239561
23425	1	234240001	234250000	0.0320814	1	0	5415	CN unmappable	0.358226
31614	2	66870001	66880000	0.00592004	1	0	5415	CN unmappable	0.153884
37292	2	123650001	123660000	0.00989873	0	0	5415	mappable	0.198985
63777	3	145300001	145310000	0.0140498	0	1	5415	junction unmappable	0.237064
82044	4	129940001	129950000	0.0175452	1	0	5415	CN unmappable	0.264917
83870	4	148200001	148210000	0.00935476	0	0	5415	mappable	0.19344
90764	5	25980001	25990000	0.00955072	0	1	5415	junction unmappable	0.195456
97971	5	98050001	98060000	0.022563	0	1	5415	junction unmappable	0.300419
98217	5	100510001	100520000	0.0354608	1	0	5415	CN unmappable	0.376621
100960	5	127940001	127950000	0.0233585	1	0	5415	CN unmappable	0.30567
102996	5	148300001	148310000	0.0186337	0	1	5415	junction unmappable	0.273011
103570	5	154040001	154050000	0.0136276	0	1	5415	junction unmappable	0.233474
116478	6	102200001	102210000	0.0434411	1	0	5415	CN unmappable	0.41685
164483	8	96710001	96720000	0.00245481	0	0	5415	mappable	0.0990921
212797	12	21710001	21720000	0.00764251	0	1	5415	junction unmappable	0.174843
223887	12	132610001	132620000	0.129621	1	0	5415	CN unmappable	0.720057
234288	13	102760001	102770000	0.00983031	0	1	5415	junction unmappable	0.198296
251649	15	53850001	53860000	0.0038919	0	1	5415	junction unmappable	0.12477
272249	17	66950001	66960000	0.0888674	1	0	5415	CN unmappable	0.596213
287411	20	59290001	59300000	0.0173747	0	1	5415	junction unmappable	0.263626
146487	X	72030001	72040000	77.7815	1	0	5415	CN unmappable	17.6388
21466	1	214650001	214660000	0.0187771	1	0	b9ea87e34b63b2829a4325cb9a3b6735aaf98ad39f4281a228b69dcdef430130	CN unmappable	0.274059
50507	3	12600001	12610000	0.0138814	0	1	b9ea87e34b63b2829a4325cb9a3b6735aaf98ad39f4281a228b69dcdef430130	junction unmappable	0.235638
55933	3	66860001	66870000	0.00776037	0	1	b9ea87e34b63b2829a4325cb9a3b6735aaf98ad39f4281a228b69dcdef430130	junction unmappable	0.176186
57069	3	78220001	78230000	0.00611843	0	1	b9ea87e34b63b2829a4325cb9a3b6735aaf98ad39f4281a228b69dcdef430130	junction unmappable	0.156441
95177	5	70110001	70120000	27.0196	1	0	b9ea87e34b63b2829a4325cb9a3b6735aaf98ad39f4281a228b69dcdef430130	CN unmappable	10.3961
118895	6	126370001	126380000	0.0103101	0	1	b9ea87e34b63b2829a4325cb9a3b6735aaf98ad39f4281a228b69dcdef430130	junction unmappable	0.203078
119284	6	130260001	130270000	0.0129033	0	0	b9ea87e34b63b2829a4325cb9a3b6735aaf98ad39f4281a228b69dcdef430130	mappable	0.227186
165299	8	104870001	104880000	0.0192392	0	1	b9ea87e34b63b2829a4325cb9a3b6735aaf98ad39f4281a228b69dcdef430130	junction unmappable	0.277411
166459	8	116470001	116480000	0.00554201	0	1	b9ea87e34b63b2829a4325cb9a3b6735aaf98ad39f4281a228b69dcdef430130	junction unmappable	0.148889
194234	10	106630001	106640000	0.0228434	0	1	b9ea87e34b63b2829a4325cb9a3b6735aaf98ad39f4281a228b69dcdef430130	junction unmappable	0.30228
194857	10	112860001	112870000	0.00641195	0	1	b9ea87e34b63b2829a4325cb9a3b6735aaf98ad39f4281a228b69dcdef430130	junction unmappable	0.160149
214692	12	40660001	40670000	0.00720994	0	1	b9ea87e34b63b2829a4325cb9a3b6735aaf98ad39f4281a228b69dcdef430130	junction unmappable	0.169823
229214	13	52020001	52030000	0.0112913	1	0	b9ea87e34b63b2829a4325cb9a3b6735aaf98ad39f4281a228b69dcdef430130	CN unmappable	0.212521
232323	13	83110001	83120000	0.0279291	1	0	b9ea87e34b63b2829a4325cb9a3b6735aaf98ad39f4281a228b69dcdef430130	CN unmappable	0.33424
256992	16	4740001	4750000	0.0109151	0	0	b9ea87e34b63b2829a4325cb9a3b6735aaf98ad39f4281a228b69dcdef430130	mappable	0.208951
273262	17	77080001	77090000	0.0101647	0	0	b9ea87e34b63b2829a4325cb9a3b6735aaf98ad39f4281a228b69dcdef430130	mappable	0.201641
293733	19	100001	110000	0.55543	1	0	b9ea87e34b63b2829a4325cb9a3b6735aaf98ad39f4281a228b69dcdef430130	CN unmappable	1.49054
299371	19	56480001	56490000	0.00880624	1	0	b9ea87e34b63b2829a4325cb9a3b6735aaf98ad39f4281a228b69dcdef430130	CN unmappable	0.187683
139291	X	70001	80000	1.11216	1	0	b9ea87e34b63b2829a4325cb9a3b6735aaf98ad39f4281a228b69dcdef430130	CN unmappable	2.10918
139610	X	3260001	3270000	0.0268464	0	1	b9ea87e34b63b2829a4325cb9a3b6735aaf98ad39f4281a228b69dcdef430130	junction unmappable	0.327698
141096	X	18120001	18130000	0.00820964	1	0	b9ea87e34b63b2829a4325cb9a3b6735aaf98ad39f4281a228b69dcdef430130	CN unmappable	0.181214
1851	1	18500001	18510000	0.00969011	0	1	A1GS	junction unmappable	0.196877
3995	1	39940001	39950000	0.00633985	0	1	A1GS	junction unmappable	0.159246
9119	1	91180001	91190000	0.00655701	0	0	A1GS	mappable	0.161951
14635	1	146340001	146350000	62.4063	1	0	A1GS	CN unmappable	15.7995
25305	2	3780001	3790000	0.00859479	0	1	A1GS	junction unmappable	0.185416
53514	3	42670001	42680000	0.00443945	0	1	A1GS	junction unmappable	0.133258
67378	3	181310001	181320000	0.0206106	1	0	A1GS	CN unmappable	0.287128
85305	4	162550001	162560000	0.0255909	1	0	A1GS	CN unmappable	0.319943
106113	5	179470001	179480000	0.00505178	0	1	A1GS	junction unmappable	0.142152
125765	7	23950001	23960000	0.00931244	0	1	A1GS	junction unmappable	0.193002
135525	7	121550001	121560000	0.00647257	0	1	A1GS	junction unmappable	0.160905
205778	11	86530001	86540000	0.0299454	1	0	A1GS	CN unmappable	0.346095
228842	13	48300001	48310000	0.0144503	1	0	A1GS	CN unmappable	0.240419
257177	16	6590001	6600000	0.00618896	1	0	A1GS	CN unmappable	0.15734
261386	16	48680001	48690000	0.0116534	0	1	A1GS	junction unmappable	0.215901
269911	17	43570001	43580000	0.0574296	1	0	A1GS	CN unmappable	0.479289
299402	19	56790001	56800000	0.00881714	0	1	A1GS	junction unmappable	0.187799
282770	20	12880001	12890000	0.00754543	0	1	A1GS	junction unmappable	0.173729
10469	1	104680001	104690000	0.0116281	0	1	A0GA	junction unmappable	0.215667
14596	1	145950001	145960000	18.2915	1	0	A0GA	CN unmappable	8.5537
17069	1	170680001	170690000	0.012339	0	1	A0GA	junction unmappable	0.222162
26746	2	18190001	18200000	0.0238462	1	0	A0GA	CN unmappable	0.308844
43622	2	186950001	186960000	0.0100688	1	0	A0GA	CN unmappable	0.200687
44266	2	193390001	193400000	0.0162223	0	1	A0GA	junction unmappable	0.254734
44565	2	196380001	196390000	0.00534414	0	1	A0GA	junction unmappable	0.146207
47265	2	223380001	223390000	0.00907566	0	1	A0GA	junction unmappable	0.190533
97223	5	90570001	90580000	0.0167341	1	0	A0GA	CN unmappable	0.25872
99808	5	116420001	116430000	0.00411505	1	0	A0GA	CN unmappable	0.128297
103527	5	153610001	153620000	0.017531	0	0	A0GA	mappable	0.26481
135810	7	124400001	124410000	0.0258617	1	0	A0GA	CN unmappable	0.321632
137868	7	144980001	144990000	0.0102429	1	0	A0GA	CN unmappable	0.202415
160140	8	53280001	53290000	0.00978912	0	1	A0GA	junction unmappable	0.19788
173503	9	40540001	40550000	77.1562	1	0	A0GA	CN unmappable	17.5677
211413	12	7870001	7880000	0.0118127	0	1	A0GA	junction unmappable	0.217372
235210	13	111980001	111990000	0.00832242	0	1	A0GA	junction unmappable	0.182455
262316	16	57980001	57990000	0.00891112	0	1	A0GA	junction unmappable	0.188797
276903	18	32290001	32300000	0.00283682	1	0	A0GA	CN unmappable	0.106524
296798	19	30750001	30760000	0.0270691	0	1	A0GA	junction unmappable	0.329054
5089	1	50880001	50890000	0.0135546	0	1	17-23564-12V-31--17-24987N-105W-BLD	junction unmappable	0.232848
10532	1	105310001	105320000	4.28248	1	0	17-23564-12V-31--17-24987N-105W-BLD	CN unmappable	4.13883
26122	2	11950001	11960000	0.0199972	0	1	17-23564-12V-31--17-24987N-105W-BLD	junction unmappable	0.282823
26383	2	14560001	14570000	0.023917	0	1	17-23564-12V-31--17-24987N-105W-BLD	junction unmappable	0.309303
28938	2	40110001	40120000	0.00644945	0	0	17-23564-12V-31--17-24987N-105W-BLD	mappable	0.160617
35768	2	108410001	108420000	0.0256636	1	0	17-23564-12V-31--17-24987N-105W-BLD	CN unmappable	0.320397
36694	2	117670001	117680000	0.00830177	0	1	17-23564-12V-31--17-24987N-105W-BLD	junction unmappable	0.182228
48482	2	235550001	235560000	25.1224	1	0	17-23564-12V-31--17-24987N-105W-BLD	CN unmappable	10.0245
50777	3	15300001	15310000	0.0103175	0	1	17-23564-12V-31--17-24987N-105W-BLD	junction unmappable	0.203151
125515	7	21450001	21460000	0.00740525	0	1	17-23564-12V-31--17-24987N-105W-BLD	junction unmappable	0.172107
167284	8	124720001	124730000	0.00878334	0	1	17-23564-12V-31--17-24987N-105W-BLD	junction unmappable	0.187439
197246	11	1210001	1220000	2675.93	1	0	17-23564-12V-31--17-24987N-105W-BLD	CN unmappable	103.459
205600	11	84750001	84760000	0.0144243	0	0	17-23564-12V-31--17-24987N-105W-BLD	mappable	0.240202
214034	12	34080001	34090000	0.00339322	0	1	17-23564-12V-31--17-24987N-105W-BLD	junction unmappable	0.116503
214635	12	40090001	40100000	0.0155119	1	0	17-23564-12V-31--17-24987N-105W-BLD	CN unmappable	0.249093
218711	12	80850001	80860000	22.3356	1	0	17-23564-12V-31--17-24987N-105W-BLD	CN unmappable	9.45211
227670	13	36580001	36590000	0.434309	1	0	17-23564-12V-31--17-24987N-105W-BLD	CN unmappable	1.31804
231374	13	73620001	73630000	0.0188721	0	1	17-23564-12V-31--17-24987N-105W-BLD	junction unmappable	0.274751
256950	16	4320001	4330000	0.0298757	1	0	17-23564-12V-31--17-24987N-105W-BLD	CN unmappable	0.345692
259471	16	29530001	29540000	31.2883	1	0	17-23564-12V-31--17-24987N-105W-BLD	CN unmappable	11.1872
285788	20	43060001	43070000	0.0659388	1	0	17-23564-12V-31--17-24987N-105W-BLD	CN unmappable	0.513571
143029	X	37450001	37460000	0.0185739	0	1	17-23564-12V-31--17-24987N-105W-BLD	junction unmappable	0.272572
6972	1	69710001	69720000	0.00959061	0	1	A5NJ	junction unmappable	0.195863
44584	2	196570001	196580000	0.0199875	0	1	A5NJ	junction unmappable	0.282754
47642	2	227150001	227160000	0.00396073	0	1	A5NJ	junction unmappable	0.125869
51682	3	24350001	24360000	0.0149969	0	1	A5NJ	junction unmappable	0.244924
51889	3	26420001	26430000	7.02622	1	0	A5NJ	CN unmappable	5.30141
58239	3	89920001	89930000	0.0197774	1	0	A5NJ	CN unmappable	0.281264
61483	3	122360001	122370000	0.0117476	0	1	A5NJ	junction unmappable	0.216773
62625	3	133780001	133790000	0.00772303	0	1	A5NJ	junction unmappable	0.175762
72718	4	36680001	36690000	0.00834965	0	1	A5NJ	junction unmappable	0.182753
88426	5	2600001	2610000	0.00893945	0	1	A5NJ	junction unmappable	0.189097
92749	5	45830001	45840000	0.016145	1	0	A5NJ	CN unmappable	0.254126
121630	6	153720001	153730000	0.00729095	0	1	A5NJ	junction unmappable	0.170774
176232	9	67830001	67840000	119.897	1	0	A5NJ	CN unmappable	21.8995
262568	16	60500001	60510000	0.00789651	0	1	A5NJ	junction unmappable	0.177725
263077	16	65590001	65600000	0.0194073	1	0	A5NJ	CN unmappable	0.27862
278211	18	45370001	45380000	0.0146359	1	0	A5NJ	CN unmappable	0.241958
305885	21	11180001	11190000	0.167995	1	0	A5NJ	CN unmappable	0.819744
148305	X	90210001	90220000	0.0383527	1	0	A5NJ	CN unmappable	0.391677
150970	X	116860001	116870000	0.0759099	1	0	A5NJ	CN unmappable	0.551035
25161	2	2340001	2350000	0.00620516	0	1	A3RK	junction unmappable	0.157546
28951	2	40240001	40250000	0.0223825	1	0	A3RK	CN unmappable	0.299216
44591	2	196640001	196650000	0.00771195	0	1	A3RK	junction unmappable	0.175635
45486	2	205590001	205600000	0.0207852	0	1	A3RK	junction unmappable	0.288342
96565	5	83990001	84000000	0.016373	1	0	A3RK	CN unmappable	0.255914
97447	5	92810001	92820000	0.0192428	0	1	A3RK	junction unmappable	0.277437
173429	9	39800001	39810000	138.892	1	0	A3RK	CN unmappable	23.5705
179058	9	96090001	96100000	0.842854	1	0	A3RK	CN unmappable	1.83614
196346	10	127750001	127760000	0.0122392	0	0	A3RK	mappable	0.221261
205918	11	87930001	87940000	0.0106614	0	0	A3RK	mappable	0.206508
208908	11	117830001	117840000	0.00936642	0	1	A3RK	junction unmappable	0.193561
218827	12	82010001	82020000	0.00780796	1	0	A3RK	CN unmappable	0.176725
231769	13	77570001	77580000	0.0136424	0	1	A3RK	junction unmappable	0.233601
232090	13	80780001	80790000	0.0142566	0	1	A3RK	junction unmappable	0.238802
237537	14	20080001	20090000	2.21907	1	0	A3RK	CN unmappable	2.97931
241102	14	55730001	55740000	0.00932591	1	0	A3RK	CN unmappable	0.193142
248278	15	20140001	20150000	0.074131	1	0	A3RK	CN unmappable	0.54454
249077	15	28130001	28140000	0.00473386	0	1	A3RK	junction unmappable	0.137606
301697	22	20610001	20620000	101.12	1	0	A3RK	CN unmappable	20.1117
147152	X	78680001	78690000	0.0173609	0	1	A3RK	junction unmappable	0.263522
154444	X	151600001	151610000	0.0202283	0	1	A3RK	junction unmappable	0.284453
4634	1	46330001	46340000	0.00925932	0	1	A0X5	junction unmappable	0.192451
44084	2	191570001	191580000	0.00642487	0	1	A0X5	junction unmappable	0.160311
54478	3	52310001	52320000	0.024257	1	0	A0X5	CN unmappable	0.311493
72138	4	30880001	30890000	0.0241605	1	0	A0X5	CN unmappable	0.310873
87326	4	182760001	182770000	0.0130899	1	0	A0X5	CN unmappable	0.228822
103550	5	153840001	153850000	0.0205782	0	1	A0X5	junction unmappable	0.286902
117215	6	109570001	109580000	0.00530122	1	0	A0X5	CN unmappable	0.145619
120893	6	146350001	146360000	0.00332727	0	0	A0X5	mappable	0.115365
125357	7	19870001	19880000	0.0189902	0	1	A0X5	junction unmappable	0.27561
170808	9	13590001	13600000	0.0124981	0	1	A0X5	junction unmappable	0.22359
179347	9	98980001	98990000	0.00916591	0	1	A0X5	junction unmappable	0.191478
197411	11	2860001	2870000	0.0295226	0	0	A0X5	mappable	0.343643
220141	12	95150001	95160000	0.0172328	1	0	A0X5	CN unmappable	0.262548
226797	13	27850001	27860000	0.00964803	0	1	A0X5	junction unmappable	0.196449
252857	15	65930001	65940000	0.0158201	0	1	A0X5	junction unmappable	0.251556
271365	17	58110001	58120000	139.206	1	0	A0X5	CN unmappable	23.5971
276154	18	24800001	24810000	0.0172553	0	1	A0X5	junction unmappable	0.262719
276333	18	26590001	26600000	0.0112401	0	0	A0X5	mappable	0.212039
309360	21	45930001	45940000	0.00768984	0	1	A0X5	junction unmappable	0.175384
7784	1	77830001	77840000	0.0446694	1	0	acf69aa660142cf43def706fbb84f6b9214ffaa15e9a8b5dc86e42d1b80b182d	CN unmappable	0.422703
8349	1	83480001	83490000	0.0204611	0	1	acf69aa660142cf43def706fbb84f6b9214ffaa15e9a8b5dc86e42d1b80b182d	junction unmappable	0.286085
43883	2	189560001	189570000	0.0158612	0	1	acf69aa660142cf43def706fbb84f6b9214ffaa15e9a8b5dc86e42d1b80b182d	junction unmappable	0.251882
49030	2	241030001	241040000	0.00547351	0	1	acf69aa660142cf43def706fbb84f6b9214ffaa15e9a8b5dc86e42d1b80b182d	junction unmappable	0.147966
70938	4	18880001	18890000	0.00863017	0	1	acf69aa660142cf43def706fbb84f6b9214ffaa15e9a8b5dc86e42d1b80b182d	junction unmappable	0.185797
102390	5	142240001	142250000	0.00985167	0	1	acf69aa660142cf43def706fbb84f6b9214ffaa15e9a8b5dc86e42d1b80b182d	junction unmappable	0.198511
117553	6	112950001	112960000	0.00676005	1	0	acf69aa660142cf43def706fbb84f6b9214ffaa15e9a8b5dc86e42d1b80b182d	CN unmappable	0.164439
121879	6	156210001	156220000	0.00797884	0	1	acf69aa660142cf43def706fbb84f6b9214ffaa15e9a8b5dc86e42d1b80b182d	junction unmappable	0.178649
162199	8	73870001	73880000	0.00856546	0	1	acf69aa660142cf43def706fbb84f6b9214ffaa15e9a8b5dc86e42d1b80b182d	junction unmappable	0.1851
176131	9	66820001	66830000	0.00836576	1	0	acf69aa660142cf43def706fbb84f6b9214ffaa15e9a8b5dc86e42d1b80b182d	CN unmappable	0.182929
197120	10	135490001	135500000	11625.3	1	0	acf69aa660142cf43def706fbb84f6b9214ffaa15e9a8b5dc86e42d1b80b182d	CN unmappable	215.641
199844	11	27190001	27200000	0.0182873	1	0	acf69aa660142cf43def706fbb84f6b9214ffaa15e9a8b5dc86e42d1b80b182d	CN unmappable	0.270461
206319	11	91940001	91950000	0.0144155	0	0	acf69aa660142cf43def706fbb84f6b9214ffaa15e9a8b5dc86e42d1b80b182d	mappable	0.240129
233027	13	90150001	90160000	0.0165527	0	1	acf69aa660142cf43def706fbb84f6b9214ffaa15e9a8b5dc86e42d1b80b182d	junction unmappable	0.257314
245267	14	97380001	97390000	0.0110702	0	1	acf69aa660142cf43def706fbb84f6b9214ffaa15e9a8b5dc86e42d1b80b182d	junction unmappable	0.21043
248513	15	22490001	22500000	0.00647675	1	0	acf69aa660142cf43def706fbb84f6b9214ffaa15e9a8b5dc86e42d1b80b182d	CN unmappable	0.160957
266746	17	11920001	11930000	0.0116449	0	1	acf69aa660142cf43def706fbb84f6b9214ffaa15e9a8b5dc86e42d1b80b182d	junction unmappable	0.215823
283515	20	20330001	20340000	0.0594778	1	0	acf69aa660142cf43def706fbb84f6b9214ffaa15e9a8b5dc86e42d1b80b182d	CN unmappable	0.487761
283650	20	21680001	21690000	0.0047257	1	0	acf69aa660142cf43def706fbb84f6b9214ffaa15e9a8b5dc86e42d1b80b182d	CN unmappable	0.137487
15324	1	153230001	153240000	0.014695	1	0	EGAN00001030897_EGAN00001030898	CN unmappable	0.242446
23919	1	239180001	239190000	0.00754745	0	0	EGAN00001030897_EGAN00001030898	mappable	0.173752
46574	2	216470001	216480000	0.0135408	1	0	EGAN00001030897_EGAN00001030898	CN unmappable	0.23273
54550	3	53030001	53040000	0.00732932	0	1	EGAN00001030897_EGAN00001030898	junction unmappable	0.171223
62400	3	131530001	131540000	0.0139266	0	1	EGAN00001030897_EGAN00001030898	junction unmappable	0.236022
67034	3	177870001	177880000	0.0124088	0	1	EGAN00001030897_EGAN00001030898	junction unmappable	0.22279
80985	4	119350001	119360000	0.0182867	1	0	EGAN00001030897_EGAN00001030898	CN unmappable	0.270457
106535	6	2770001	2780000	0.0110367	0	0	EGAN00001030897_EGAN00001030898	mappable	0.210111
106630	6	3720001	3730000	0.00538146	0	1	EGAN00001030897_EGAN00001030898	junction unmappable	0.146717
123121	6	168630001	168640000	0.133373	1	0	EGAN00001030897_EGAN00001030898	CN unmappable	0.730404
176025	9	65760001	65770000	61.7685	1	0	EGAN00001030897_EGAN00001030898	CN unmappable	15.7186
180092	9	106430001	106440000	0.00548749	0	1	EGAN00001030897_EGAN00001030898	junction unmappable	0.148155
185379	10	18080001	18090000	7.74338	1	0	EGAN00001030897_EGAN00001030898	CN unmappable	5.56539
204320	11	71950001	71960000	0.00790596	0	1	EGAN00001030897_EGAN00001030898	junction unmappable	0.177831
227803	13	37910001	37920000	0.0135782	0	1	EGAN00001030897_EGAN00001030898	junction unmappable	0.233051
228470	13	44580001	44590000	0.0029637	0	0	EGAN00001030897_EGAN00001030898	mappable	0.10888
232084	13	80720001	80730000	0.0287381	1	0	EGAN00001030897_EGAN00001030898	CN unmappable	0.339046
243823	14	82940001	82950000	0.012979	1	0	EGAN00001030897_EGAN00001030898	CN unmappable	0.227851
249887	15	36230001	36240000	0.0181054	0	1	EGAN00001030897_EGAN00001030898	junction unmappable	0.269113
265925	17	3710001	3720000	0.0079061	0	1	EGAN00001030897_EGAN00001030898	junction unmappable	0.177832
286967	20	54850001	54860000	0.0156235	1	0	EGAN00001030897_EGAN00001030898	CN unmappable	0.249988
145584	X	63000001	63010000	0.0114348	0	1	EGAN00001030897_EGAN00001030898	junction unmappable	0.213867
7107	1	71060001	71070000	0.0454778	1	0	MELA_0237	CN unmappable	0.426511
14953	1	149520001	149530000	5.26309	1	0	MELA_0237	CN unmappable	4.58829
32454	2	75270001	75280000	0.0124562	0	0	MELA_0237	mappable	0.223215
40931	2	160040001	160050000	0.0091044	0	1	MELA_0237	junction unmappable	0.190834
70584	4	15340001	15350000	0.0153145	0	0	MELA_0237	mappable	0.247503
79304	4	102540001	102550000	0.00910265	0	1	MELA_0237	junction unmappable	0.190816
79467	4	104170001	104180000	0.0107744	1	0	MELA_0237	CN unmappable	0.207599
84747	4	156970001	156980000	0.0131974	1	0	MELA_0237	CN unmappable	0.22976
85327	4	162770001	162780000	0.00785101	0	1	MELA_0237	junction unmappable	0.177212
102973	5	148070001	148080000	0.0115696	0	1	MELA_0237	junction unmappable	0.215124
104194	5	160280001	160290000	0.0131188	0	1	MELA_0237	junction unmappable	0.229075
106189	5	180230001	180240000	0.0146662	0	1	MELA_0237	junction unmappable	0.242209
129570	7	62000001	62010000	0.434969	1	0	MELA_0237	CN unmappable	1.31904
169068	8	142560001	142570000	0.0268092	1	0	MELA_0237	CN unmappable	0.32747
172717	9	32680001	32690000	0.0128369	1	0	MELA_0237	CN unmappable	0.2266
192247	10	86760001	86770000	0.00493401	0	1	MELA_0237	junction unmappable	0.140485
203799	11	66740001	66750000	0.0159759	1	0	MELA_0237	CN unmappable	0.252792
209394	11	122690001	122700000	0.0175151	1	0	MELA_0237	CN unmappable	0.26469
218749	12	81230001	81240000	0.00536569	0	1	MELA_0237	junction unmappable	0.146502
222481	12	118550001	118560000	0.0116804	0	1	MELA_0237	junction unmappable	0.216152
243686	14	81570001	81580000	0.0154854	0	1	MELA_0237	junction unmappable	0.248881
248454	15	21900001	21910000	0.00983265	1	0	MELA_0237	CN unmappable	0.198319
1612	1	16110001	16120000	0.0195495	1	0	CA-0008	CN unmappable	0.279639
36878	2	119510001	119520000	0.00827539	0	1	CA-0008	junction unmappable	0.181938
37930	2	130030001	130040000	0.00896218	0	0	CA-0008	mappable	0.189338
45416	2	204890001	204900000	0.00670954	0	1	CA-0008	junction unmappable	0.163824
123658	7	2880001	2890000	0.00953349	1	0	CA-0008	CN unmappable	0.195279
130209	7	68390001	68400000	0.0117139	0	1	CA-0008	junction unmappable	0.216461
134415	7	110450001	110460000	0.0142984	1	0	CA-0008	CN unmappable	0.239152
154989	8	1770001	1780000	0.19852	1	0	CA-0008	CN unmappable	0.891111
171905	9	24560001	24570000	0.0104845	0	0	CA-0008	mappable	0.204787
176394	9	69450001	69460000	0.0244797	1	0	CA-0008	CN unmappable	0.31292
195189	10	116180001	116190000	0.00772711	0	1	CA-0008	junction unmappable	0.175808
213595	12	29690001	29700000	0.0176454	0	1	CA-0008	junction unmappable	0.265672
214874	12	42480001	42490000	0.00966156	0	1	CA-0008	junction unmappable	0.196586
229353	13	53410001	53420000	0.012319	0	1	CA-0008	junction unmappable	0.221982
232880	13	88680001	88690000	0.00339998	0	1	CA-0008	junction unmappable	0.116619
233792	13	97800001	97810000	0.0267932	1	0	CA-0008	CN unmappable	0.327373
253278	15	70140001	70150000	0.014951	0	0	CA-0008	mappable	0.244548
264254	16	77360001	77370000	0.0322822	1	0	CA-0008	CN unmappable	0.359345
271989	17	64350001	64360000	0.00814809	0	1	CA-0008	junction unmappable	0.180533
297031	19	33080001	33090000	0.0152639	1	0	CA-0008	CN unmappable	0.247094
302013	22	23770001	23780000	0.0137543	1	0	CA-0008	CN unmappable	0.234558
139396	X	1120001	1130000	49.1492	1	0	CA-0008	CN unmappable	14.0213
144185	X	49010001	49020000	0.00951808	0	1	CA-0008	junction unmappable	0.195121
1370	1	13690001	13700000	14.3673	1	0	7136	CN unmappable	7.58084
21204	1	212030001	212040000	0.00768506	0	1	7136	junction unmappable	0.175329
22402	1	224010001	224020000	0.00315115	0	1	7136	junction unmappable	0.11227
37889	2	129620001	129630000	0.0147077	1	0	7136	CN unmappable	0.242551
48149	2	232220001	232230000	0.0174789	0	1	7136	junction unmappable	0.264416
55686	3	64390001	64400000	0.0115191	0	1	7136	junction unmappable	0.214654
64055	3	148080001	148090000	0.00357824	0	0	7136	mappable	0.119637
109833	6	35750001	35760000	0.00806001	1	0	7136	CN unmappable	0.179555
129566	7	61960001	61970000	0.0107901	1	0	7136	CN unmappable	0.207751
162113	8	73010001	73020000	0.0352988	0	1	7136	junction unmappable	0.375759
164280	8	94680001	94690000	0.00447498	1	0	7136	CN unmappable	0.133791
200305	11	31800001	31810000	0.0116071	0	1	7136	junction unmappable	0.215472
226739	13	27270001	27280000	0.00523312	0	1	7136	junction unmappable	0.144681
227911	13	38990001	39000000	0.0100461	0	1	7136	junction unmappable	0.20046
229349	13	53370001	53380000	0.0266452	0	1	7136	junction unmappable	0.326467
229544	13	55320001	55330000	0.00993801	0	0	7136	mappable	0.199379
258155	16	16370001	16380000	1.47033	1	0	7136	CN unmappable	2.42515
269993	17	44390001	44400000	3.75146	1	0	7136	CN unmappable	3.87374
294143	19	4200001	4210000	0.0217825	0	1	7136	junction unmappable	0.295178
297838	19	41150001	41160000	0.124352	1	0	7136	CN unmappable	0.705272
286580	20	50980001	50990000	0.0101184	0	0	7136	mappable	0.201181
146843	X	75590001	75600000	0.0280459	1	0	7136	CN unmappable	0.334938
6354	1	63530001	63540000	0.00956605	0	1	A01S	junction unmappable	0.195612
49618	3	3710001	3720000	0.0219046	1	0	A01S	CN unmappable	0.296004
62006	3	127590001	127600000	0.010227	1	0	A01S	CN unmappable	0.202257
87916	4	188660001	188670000	0.00919176	0	1	A01S	junction unmappable	0.191747
106275	6	170001	180000	29.3825	1	0	A01S	CN unmappable	10.8411
106386	6	1280001	1290000	0.0266957	0	0	A01S	mappable	0.326776
110854	6	45960001	45970000	0.0275708	1	0	A01S	CN unmappable	0.332089
132651	7	92810001	92820000	0.0188322	0	0	A01S	mappable	0.274461
161615	8	68030001	68040000	0.00753822	0	1	A01S	junction unmappable	0.173646
176099	9	66500001	66510000	0.014634	1	0	A01S	CN unmappable	0.241942
176953	9	75040001	75050000	0.0224671	1	0	A01S	CN unmappable	0.29978
177449	9	80000001	80010000	0.00348388	0	1	A01S	junction unmappable	0.118049
193003	10	94320001	94330000	0.00938823	0	1	A01S	junction unmappable	0.193786
203371	11	62460001	62470000	0.0199757	0	1	A01S	junction unmappable	0.282671
210830	12	2040001	2050000	0.0143297	0	1	A01S	junction unmappable	0.239413
255468	15	92040001	92050000	0.0103369	1	0	A01S	CN unmappable	0.203341
259358	16	28400001	28410000	15.0309	1	0	A01S	CN unmappable	7.75395
270850	17	52960001	52970000	0.00964924	0	1	A01S	junction unmappable	0.196461
274924	18	12500001	12510000	0.0236664	0	1	A01S	junction unmappable	0.307678
277344	18	36700001	36710000	0.0143967	1	0	A01S	CN unmappable	0.239973
278032	18	43580001	43590000	0.0109112	0	1	A01S	junction unmappable	0.208913
6644	1	66430001	66440000	0.00674099	0	1	MELA_0242	junction unmappable	0.164207
35468	2	105410001	105420000	0.0117564	0	1	MELA_0242	junction unmappable	0.216854
42540	2	176130001	176140000	0.0135684	0	1	MELA_0242	junction unmappable	0.232967
68818	3	195710001	195720000	0.110572	1	0	MELA_0242	CN unmappable	0.665048
94375	5	62090001	62100000	0.0111611	1	0	MELA_0242	CN unmappable	0.211292
95163	5	69970001	69980000	10.4044	1	0	MELA_0242	CN unmappable	6.45118
95185	5	70190001	70200000	214.87	1	0	MELA_0242	CN unmappable	29.3169
96389	5	82230001	82240000	0.0571015	1	0	MELA_0242	CN unmappable	0.477918
158335	8	35230001	35240000	0.0147407	0	1	MELA_0242	junction unmappable	0.242823
160909	8	60970001	60980000	0.00776405	0	0	MELA_0242	mappable	0.176228
192814	10	92430001	92440000	0.00837688	0	1	MELA_0242	junction unmappable	0.183051
206793	11	96680001	96690000	0.00549562	0	1	MELA_0242	junction unmappable	0.148265
210290	11	131650001	131660000	0.0166709	1	0	MELA_0242	CN unmappable	0.258232
215122	12	44960001	44970000	0.014057	0	1	MELA_0242	junction unmappable	0.237124
259422	16	29040001	29050000	0.125982	1	0	MELA_0242	CN unmappable	0.709878
269552	17	39980001	39990000	0.00788449	0	1	MELA_0242	junction unmappable	0.177589
297400	19	36770001	36780000	80.22	1	0	MELA_0242	CN unmappable	17.9131
282701	20	12190001	12200000	0.0262806	0	0	MELA_0242	mappable	0.324226
285660	20	41780001	41790000	0.00748195	0	1	MELA_0242	junction unmappable	0.172996
149524	X	102400001	102410000	0.0114919	0	1	MELA_0242	junction unmappable	0.214401
14286	1	142850001	142860000	0.197281	1	0	MELA_0213	CN unmappable	0.888327
18338	1	183370001	183380000	0.00780489	0	1	MELA_0213	junction unmappable	0.176691
18806	1	188050001	188060000	0.00360891	0	1	MELA_0213	junction unmappable	0.120148
27337	2	24100001	24110000	0.021364	1	0	MELA_0213	CN unmappable	0.292329
31638	2	67110001	67120000	0.00913437	0	1	MELA_0213	junction unmappable	0.191148
44445	2	195180001	195190000	0.0083507	0	0	MELA_0213	mappable	0.182764
83176	4	141260001	141270000	0.0243415	1	0	MELA_0213	CN unmappable	0.312035
86942	4	178920001	178930000	0.0236191	1	0	MELA_0213	CN unmappable	0.30737
88222	5	560001	570000	0.152055	1	0	MELA_0213	CN unmappable	0.779884
101494	5	133280001	133290000	0.0114246	0	1	MELA_0213	junction unmappable	0.213772
136527	7	131570001	131580000	0.0135407	0	1	MELA_0213	junction unmappable	0.232729
167162	8	123500001	123510000	0.00905114	0	1	MELA_0213	junction unmappable	0.190275
179835	9	103860001	103870000	39.9264	1	0	MELA_0213	CN unmappable	12.6375
180346	9	108970001	108980000	0.0154948	1	0	MELA_0213	CN unmappable	0.248956
185366	10	17950001	17960000	51.403	1	0	MELA_0213	CN unmappable	14.3392
188019	10	44480001	44490000	0.0104685	0	1	MELA_0213	junction unmappable	0.204631
190656	10	70850001	70860000	0.0104213	0	1	MELA_0213	junction unmappable	0.20417
269445	17	38910001	38920000	0.00662169	0	1	MELA_0213	junction unmappable	0.162748
308839	21	40720001	40730000	0.00877525	0	1	MELA_0213	junction unmappable	0.187353
148378	X	90940001	90950000	0.0145532	1	0	MELA_0213	CN unmappable	0.241273
149698	X	104140001	104150000	0.0604908	1	0	MELA_0213	CN unmappable	0.491897
8427	1	84260001	84270000	0.0088789	0	1	WCM-6-case	junction unmappable	0.188456
20542	1	205410001	205420000	0.0272444	0	0	WCM-6-case	mappable	0.330117
40217	2	152900001	152910000	0.0221185	0	1	WCM-6-case	junction unmappable	0.297446
42266	2	173390001	173400000	0.0169745	0	1	WCM-6-case	junction unmappable	0.260572
49851	3	6040001	6050000	0.0122418	0	1	WCM-6-case	junction unmappable	0.221285
52250	3	30030001	30040000	0.0330416	1	0	WCM-6-case	CN unmappable	0.363547
71090	4	20400001	20410000	0.0213374	0	0	WCM-6-case	mappable	0.292146
96007	5	78410001	78420000	0.0168554	0	1	WCM-6-case	junction unmappable	0.259657
109354	6	30960001	30970000	0.0200421	1	0	WCM-6-case	CN unmappable	0.283141
124682	7	13120001	13130000	0.0297994	1	0	WCM-6-case	CN unmappable	0.34525
126643	7	32730001	32740000	0.0310873	1	0	WCM-6-case	CN unmappable	0.352632
135655	7	122850001	122860000	2.85182	1	0	WCM-6-case	CN unmappable	3.37746
165084	8	102720001	102730000	0.00450104	0	1	WCM-6-case	junction unmappable	0.13418
167833	8	130210001	130220000	0.0129528	0	0	WCM-6-case	mappable	0.227621
194890	10	113190001	113200000	2.39868	1	0	WCM-6-case	CN unmappable	3.09753
202106	11	49810001	49820000	19.2265	1	0	WCM-6-case	CN unmappable	8.76961
208966	11	118410001	118420000	0.0101559	0	1	WCM-6-case	junction unmappable	0.201553
240082	14	45530001	45540000	0.0201757	0	1	WCM-6-case	junction unmappable	0.284082
240309	14	47800001	47810000	0.00926612	0	0	WCM-6-case	mappable	0.192521
256947	16	4290001	4300000	0.023148	0	1	WCM-6-case	junction unmappable	0.30429
258188	16	16700001	16710000	0.0122193	1	0	WCM-6-case	CN unmappable	0.221082
269775	17	42210001	42220000	0.00873587	1	0	WCM-6-case	CN unmappable	0.186932
140153	X	8690001	8700000	0.00773017	1	0	WCM-6-case	CN unmappable	0.175843
143228	X	39440001	39450000	0.00887912	0	1	WCM-6-case	junction unmappable	0.188458
20771	1	207700001	207710000	154.063	1	0	4135350	CN unmappable	24.8244
22373	1	223720001	223730000	14.43	1	0	4135350	CN unmappable	7.59736
44071	2	191440001	191450000	0.0141838	0	1	4135350	junction unmappable	0.238191
48303	2	233760001	233770000	0.0179738	1	0	4135350	CN unmappable	0.268133
48892	2	239650001	239660000	0.00565311	0	1	4135350	junction unmappable	0.150374
85837	4	167870001	167880000	0.0247295	1	0	4135350	CN unmappable	0.314512
98461	5	102950001	102960000	0.00593574	0	1	4135350	junction unmappable	0.154087
109798	6	35400001	35410000	0.0218223	0	1	4135350	junction unmappable	0.295447
117650	6	113920001	113930000	0.021782	1	0	4135350	CN unmappable	0.295174
129657	7	62870001	62880000	72.2233	1	0	4135350	CN unmappable	16.9969
134888	7	115180001	115190000	0.0278624	0	1	4135350	junction unmappable	0.333841
177343	9	78940001	78950000	0.0207962	0	1	4135350	junction unmappable	0.288418
192242	10	86710001	86720000	0.0180806	0	1	4135350	junction unmappable	0.268928
216773	12	61470001	61480000	0.015611	1	0	4135350	CN unmappable	0.249888
227846	13	38340001	38350000	0.00437067	0	0	4135350	mappable	0.132222
262454	16	59360001	59370000	0.00891589	0	1	4135350	junction unmappable	0.188848
275154	18	14800001	14810000	0.127867	1	0	4135350	CN unmappable	0.715169
144736	X	54520001	54530000	0.0162576	0	1	4135350	junction unmappable	0.255011
146167	X	68830001	68840000	0.0151111	0	1	4135350	junction unmappable	0.245854
153343	X	140590001	140600000	153.247	1	0	4135350	CN unmappable	24.7586
34554	2	96270001	96280000	2.12144	1	0	660-24055-83O-27--660-25082N-213R-BLD	CN unmappable	2.91303
38737	2	138100001	138110000	0.0196501	0	1	660-24055-83O-27--660-25082N-213R-BLD	junction unmappable	0.280358
53396	3	41490001	41500000	0.00466735	0	1	660-24055-83O-27--660-25082N-213R-BLD	junction unmappable	0.136636
62377	3	131300001	131310000	0.00812591	0	1	660-24055-83O-27--660-25082N-213R-BLD	junction unmappable	0.180288
69346	4	2960001	2970000	0.0272272	1	0	660-24055-83O-27--660-25082N-213R-BLD	CN unmappable	0.330014
73963	4	49130001	49140000	0.0522022	1	0	660-24055-83O-27--660-25082N-213R-BLD	CN unmappable	0.456956
86735	4	176850001	176860000	0.012899	0	1	660-24055-83O-27--660-25082N-213R-BLD	junction unmappable	0.227148
86983	4	179330001	179340000	0.0119743	0	1	660-24055-83O-27--660-25082N-213R-BLD	junction unmappable	0.218855
88551	5	3850001	3860000	0.00941003	1	0	660-24055-83O-27--660-25082N-213R-BLD	CN unmappable	0.194011
88923	5	7570001	7580000	0.00989215	0	1	660-24055-83O-27--660-25082N-213R-BLD	junction unmappable	0.198919
111657	6	53990001	54000000	0.0109512	0	0	660-24055-83O-27--660-25082N-213R-BLD	mappable	0.209296
163178	8	83660001	83670000	0.0104527	0	1	660-24055-83O-27--660-25082N-213R-BLD	junction unmappable	0.204477
183507	9	140580001	140590000	0.00350644	1	0	660-24055-83O-27--660-25082N-213R-BLD	CN unmappable	0.11843
189239	10	56680001	56690000	0.0293997	1	0	660-24055-83O-27--660-25082N-213R-BLD	CN unmappable	0.342927
193604	10	100330001	100340000	0.012223	0	1	660-24055-83O-27--660-25082N-213R-BLD	junction unmappable	0.221116
217303	12	66770001	66780000	0.0064065	0	1	660-24055-83O-27--660-25082N-213R-BLD	junction unmappable	0.160081
226579	13	25670001	25680000	0.0206763	0	1	660-24055-83O-27--660-25082N-213R-BLD	junction unmappable	0.287585
259400	16	28820001	28830000	0.459489	1	0	660-24055-83O-27--660-25082N-213R-BLD	CN unmappable	1.35571
270004	17	44500001	44510000	20.0098	1	0	660-24055-83O-27--660-25082N-213R-BLD	CN unmappable	8.94646
3054	1	30530001	30540000	0.0118357	0	1	A6VZ	junction unmappable	0.217584
14353	1	143520001	143530000	0.0792493	1	0	A6VZ	CN unmappable	0.563025
36247	2	113200001	113210000	0.00354275	1	0	A6VZ	CN unmappable	0.119042
37812	2	128850001	128860000	0.00745958	0	1	A6VZ	junction unmappable	0.172738
54815	3	55680001	55690000	0.011625	0	1	A6VZ	junction unmappable	0.215639
101451	5	132850001	132860000	0.00476628	0	1	A6VZ	junction unmappable	0.138076
129836	7	64660001	64670000	0.00664423	1	0	A6VZ	CN unmappable	0.163024
132438	7	90680001	90690000	0.0275245	1	0	A6VZ	CN unmappable	0.33181
158869	8	40570001	40580000	0.0117747	1	0	A6VZ	CN unmappable	0.217023
162593	8	77810001	77820000	0.00991477	0	1	A6VZ	junction unmappable	0.199146
164206	8	93940001	93950000	0.0093293	0	1	A6VZ	junction unmappable	0.193177
202726	11	56010001	56020000	0.00589416	0	1	A6VZ	junction unmappable	0.153547
238140	14	26110001	26120000	0.0100932	1	0	A6VZ	CN unmappable	0.20093
253195	15	69310001	69320000	0.00233272	0	1	A6VZ	junction unmappable	0.0965965
258660	16	21420001	21430000	36.5409	1	0	A6VZ	CN unmappable	12.0898
264533	16	80150001	80160000	0.0177324	0	1	A6VZ	junction unmappable	0.266326
294941	19	12180001	12190000	0.0116581	0	1	A6VZ	junction unmappable	0.215945
285413	20	39310001	39320000	0.0179522	0	0	A6VZ	mappable	0.267972
302091	22	24550001	24560000	0.00661137	0	0	A6VZ	mappable	0.162621
154743	X	154590001	154600000	22.8814	1	0	A6VZ	CN unmappable	9.5669
33661	2	87340001	87350000	38.5534	1	0	A20T	CN unmappable	12.4183
33953	2	90260001	90270000	32.6175	1	0	A20T	CN unmappable	11.4223
42870	2	179430001	179440000	0.00924529	0	0	A20T	mappable	0.192305
54231	3	49840001	49850000	0.0192231	0	0	A20T	mappable	0.277295
73010	4	39600001	39610000	0.0275919	0	1	A20T	junction unmappable	0.332216
78210	4	91600001	91610000	2.50263	1	0	A20T	CN unmappable	3.16394
85797	4	167470001	167480000	0.0245904	1	0	A20T	CN unmappable	0.313627
96607	5	84410001	84420000	0.0170622	0	1	A20T	junction unmappable	0.261244
129888	7	65180001	65190000	0.020304	1	0	A20T	CN unmappable	0.284984
158513	8	37010001	37020000	0.00556139	0	1	A20T	junction unmappable	0.149149
161739	8	69270001	69280000	0.573289	1	0	A20T	CN unmappable	1.51432
163748	8	89360001	89370000	0.00730206	0	1	A20T	junction unmappable	0.170904
164241	8	94290001	94300000	0.00996421	0	1	A20T	junction unmappable	0.199642
165610	8	107980001	107990000	0.011267	0	0	A20T	mappable	0.212292
179256	9	98070001	98080000	0.0194985	0	1	A20T	junction unmappable	0.279274
190192	10	66210001	66220000	0.0101799	0	1	A20T	junction unmappable	0.201791
259441	16	29230001	29240000	0.0901889	1	0	A20T	CN unmappable	0.600629
266903	17	13490001	13500000	0.00507061	0	1	A20T	junction unmappable	0.142416
270843	17	52890001	52900000	0.00503836	0	1	A20T	junction unmappable	0.141963
271588	17	60340001	60350000	0.0793953	1	0	A20T	CN unmappable	0.563543
273652	17	80980001	80990000	0.0268308	1	0	A20T	CN unmappable	0.327602
274939	18	12650001	12660000	0.00954994	0	1	A20T	junction unmappable	0.195448
283810	20	23280001	23290000	0.0200811	1	0	A20T	CN unmappable	0.283416
8419	1	84180001	84190000	0.00264798	0	1	A496	junction unmappable	0.102917
10392	1	103910001	103920000	0.279144	1	0	A496	CN unmappable	1.05668
23027	1	230260001	230270000	0.0133911	0	1	A496	junction unmappable	0.23144
32796	2	78690001	78700000	0.0121746	0	1	A496	junction unmappable	0.220677
32892	2	79650001	79660000	0.00521935	0	0	A496	mappable	0.14449
47431	2	225040001	225050000	0.00549336	0	1	A496	junction unmappable	0.148234
81391	4	123410001	123420000	0.0267997	1	0	A496	CN unmappable	0.327413
116438	6	101800001	101810000	0.00381593	0	0	A496	mappable	0.123546
122217	6	159590001	159600000	0.0100659	0	0	A496	mappable	0.200658
130162	7	67920001	67930000	0.0102125	1	0	A496	CN unmappable	0.202114
158260	8	34480001	34490000	0.00987975	0	1	A496	junction unmappable	0.198794
158351	8	35390001	35400000	0.021165	1	0	A496	CN unmappable	0.290964
165445	8	106330001	106340000	0.00447381	0	1	A496	junction unmappable	0.133773
168493	8	136810001	136820000	0.0108055	0	1	A496	junction unmappable	0.207899
196408	10	128370001	128380000	0.0119532	1	0	A496	CN unmappable	0.218662
252145	15	58810001	58820000	0.0120102	0	1	A496	junction unmappable	0.219182
258563	16	20450001	20460000	42.9795	1	0	A496	CN unmappable	13.1117
262101	16	55830001	55840000	0.669445	1	0	A496	CN unmappable	1.63639
286510	20	50280001	50290000	0.0111903	0	1	A496	junction unmappable	0.211569
301361	22	17250001	17260000	9.1473	1	0	A496	CN unmappable	6.0489
147865	X	85810001	85820000	31.6306	1	0	A496	CN unmappable	11.2482
147935	X	86510001	86520000	0.0114079	0	1	A496	junction unmappable	0.213615
34517	2	95900001	95910000	0.00934314	1	0	3593	CN unmappable	0.19332
38683	2	137560001	137570000	0.0158838	0	1	3593	junction unmappable	0.252062
42907	2	179800001	179810000	0.0208281	0	1	3593	junction unmappable	0.288639
47874	2	229470001	229480000	0.00882118	1	0	3593	CN unmappable	0.187842
57485	3	82380001	82390000	0.0284452	1	0	3593	CN unmappable	0.337314
66316	3	170690001	170700000	0.00967454	0	1	3593	junction unmappable	0.196718
96450	5	82840001	82850000	0.0139321	0	1	3593	junction unmappable	0.236068
99909	5	117430001	117440000	0.00669193	0	0	3593	mappable	0.163608
100936	5	127700001	127710000	0.0127814	0	1	3593	junction unmappable	0.22611
110186	6	39280001	39290000	0.0109052	0	0	3593	mappable	0.208855
114988	6	87300001	87310000	0.00809295	0	1	3593	junction unmappable	0.179922
132260	7	88900001	88910000	0.0252833	1	0	3593	CN unmappable	0.318015
133963	7	105930001	105940000	0.0142691	1	0	3593	CN unmappable	0.238906
176066	9	66170001	66180000	16.4934	1	0	3593	CN unmappable	8.12241
181011	9	115620001	115630000	0.0160394	1	0	3593	CN unmappable	0.253293
189153	10	55820001	55830000	0.0100342	0	1	3593	junction unmappable	0.200342
190486	10	69150001	69160000	0.0146823	1	0	3593	CN unmappable	0.242341
205748	11	86230001	86240000	0.0128229	0	1	3593	junction unmappable	0.226476
229440	13	54280001	54290000	0.0254663	0	0	3593	mappable	0.319164
254202	15	79380001	79390000	0.0182937	1	0	3593	CN unmappable	0.270508
261589	16	50710001	50720000	0.00615473	0	1	3593	junction unmappable	0.156904
262817	16	62990001	63000000	0.0112359	0	1	3593	junction unmappable	0.211999
267114	17	15600001	15610000	0.0027591	1	0	3593	CN unmappable	0.105054
4773	1	47720001	47730000	0.0181361	0	1	3fff03c9f87217265b27301425821d28012ec9572f60666565d1d3dc802d1030	junction unmappable	0.26934
14884	1	148830001	148840000	82.8287	1	0	3fff03c9f87217265b27301425821d28012ec9572f60666565d1d3dc802d1030	CN unmappable	18.2021
24316	1	243150001	243160000	0.0260329	1	0	3fff03c9f87217265b27301425821d28012ec9572f60666565d1d3dc802d1030	CN unmappable	0.322695
30835	2	59080001	59090000	0.0162328	0	0	3fff03c9f87217265b27301425821d28012ec9572f60666565d1d3dc802d1030	mappable	0.254816
33964	2	90370001	90380000	1963.22	1	0	3fff03c9f87217265b27301425821d28012ec9572f60666565d1d3dc802d1030	CN unmappable	88.6164
45563	2	206360001	206370000	0.0134171	0	1	3fff03c9f87217265b27301425821d28012ec9572f60666565d1d3dc802d1030	junction unmappable	0.231665
66160	3	169130001	169140000	0.0179944	1	0	3fff03c9f87217265b27301425821d28012ec9572f60666565d1d3dc802d1030	CN unmappable	0.268287
79502	4	104520001	104530000	0.0150601	1	0	3fff03c9f87217265b27301425821d28012ec9572f60666565d1d3dc802d1030	CN unmappable	0.245439
86438	4	173880001	173890000	0.00882005	0	1	3fff03c9f87217265b27301425821d28012ec9572f60666565d1d3dc802d1030	junction unmappable	0.18783
87664	4	186140001	186150000	0.0164194	1	0	3fff03c9f87217265b27301425821d28012ec9572f60666565d1d3dc802d1030	CN unmappable	0.256277
97111	5	89450001	89460000	0.00227795	0	0	3fff03c9f87217265b27301425821d28012ec9572f60666565d1d3dc802d1030	mappable	0.0954557
129661	7	62910001	62920000	40.5552	1	0	3fff03c9f87217265b27301425821d28012ec9572f60666565d1d3dc802d1030	CN unmappable	12.7366
189679	10	61080001	61090000	0.00359804	0	1	3fff03c9f87217265b27301425821d28012ec9572f60666565d1d3dc802d1030	junction unmappable	0.119967
192340	10	87690001	87700000	0.00952988	0	1	3fff03c9f87217265b27301425821d28012ec9572f60666565d1d3dc802d1030	junction unmappable	0.195242
197892	11	7670001	7680000	0.0106158	1	0	3fff03c9f87217265b27301425821d28012ec9572f60666565d1d3dc802d1030	CN unmappable	0.206066
207736	11	106110001	106120000	0.00533191	0	1	3fff03c9f87217265b27301425821d28012ec9572f60666565d1d3dc802d1030	junction unmappable	0.14604
230038	13	60260001	60270000	0.0104179	0	0	3fff03c9f87217265b27301425821d28012ec9572f60666565d1d3dc802d1030	mappable	0.204137
238390	14	28610001	28620000	0.00975674	1	0	3fff03c9f87217265b27301425821d28012ec9572f60666565d1d3dc802d1030	CN unmappable	0.197552
243500	14	79710001	79720000	0.0249123	0	1	3fff03c9f87217265b27301425821d28012ec9572f60666565d1d3dc802d1030	junction unmappable	0.315673
252806	15	65420001	65430000	0.00738343	0	1	3fff03c9f87217265b27301425821d28012ec9572f60666565d1d3dc802d1030	junction unmappable	0.171854
256992	16	4740001	4750000	0.0109151	0	0	3fff03c9f87217265b27301425821d28012ec9572f60666565d1d3dc802d1030	mappable	0.208951
263535	16	70170001	70180000	0.00909228	1	0	3fff03c9f87217265b27301425821d28012ec9572f60666565d1d3dc802d1030	CN unmappable	0.190707
285827	20	43450001	43460000	0.0133911	0	1	3fff03c9f87217265b27301425821d28012ec9572f60666565d1d3dc802d1030	junction unmappable	0.23144
144151	X	48670001	48680000	0.0183429	0	1	3fff03c9f87217265b27301425821d28012ec9572f60666565d1d3dc802d1030	junction unmappable	0.270872
14519	1	145180001	145190000	0.0154923	1	0	ab989ee5292af30a60ec0513ddc11cf15438035981075b0857e0d057d010c1fb	CN unmappable	0.248936
30065	2	51380001	51390000	0.0063423	0	0	ab989ee5292af30a60ec0513ddc11cf15438035981075b0857e0d057d010c1fb	mappable	0.159277
40894	2	159670001	159680000	0.014391	0	1	ab989ee5292af30a60ec0513ddc11cf15438035981075b0857e0d057d010c1fb	junction unmappable	0.239925
43769	2	188420001	188430000	0.0066947	1	0	ab989ee5292af30a60ec0513ddc11cf15438035981075b0857e0d057d010c1fb	CN unmappable	0.163642
56331	3	70840001	70850000	0.00589811	1	0	ab989ee5292af30a60ec0513ddc11cf15438035981075b0857e0d057d010c1fb	CN unmappable	0.153598
86360	4	173100001	173110000	0.0217988	1	0	ab989ee5292af30a60ec0513ddc11cf15438035981075b0857e0d057d010c1fb	CN unmappable	0.295288
87033	4	179830001	179840000	0.00940436	0	1	ab989ee5292af30a60ec0513ddc11cf15438035981075b0857e0d057d010c1fb	junction unmappable	0.193952
132756	7	93860001	93870000	0.00484229	0	1	ab989ee5292af30a60ec0513ddc11cf15438035981075b0857e0d057d010c1fb	junction unmappable	0.139173
135509	7	121390001	121400000	0.0155139	0	0	ab989ee5292af30a60ec0513ddc11cf15438035981075b0857e0d057d010c1fb	mappable	0.24911
164574	8	97620001	97630000	0.0229279	0	1	ab989ee5292af30a60ec0513ddc11cf15438035981075b0857e0d057d010c1fb	junction unmappable	0.302839
178295	9	88460001	88470000	0.0126634	1	0	ab989ee5292af30a60ec0513ddc11cf15438035981075b0857e0d057d010c1fb	CN unmappable	0.225064
185412	10	18410001	18420000	0.00651424	0	1	ab989ee5292af30a60ec0513ddc11cf15438035981075b0857e0d057d010c1fb	junction unmappable	0.161422
185517	10	19460001	19470000	0.0327957	1	0	ab989ee5292af30a60ec0513ddc11cf15438035981075b0857e0d057d010c1fb	CN unmappable	0.362192
222889	12	122630001	122640000	0.00752883	0	1	ab989ee5292af30a60ec0513ddc11cf15438035981075b0857e0d057d010c1fb	junction unmappable	0.173538
249312	15	30480001	30490000	4.43929	1	0	ab989ee5292af30a60ec0513ddc11cf15438035981075b0857e0d057d010c1fb	CN unmappable	4.21392
249831	15	35670001	35680000	0.00327559	0	1	ab989ee5292af30a60ec0513ddc11cf15438035981075b0857e0d057d010c1fb	junction unmappable	0.114466
250379	15	41150001	41160000	0.0097482	0	1	ab989ee5292af30a60ec0513ddc11cf15438035981075b0857e0d057d010c1fb	junction unmappable	0.197466
260012	16	34940001	34950000	0.00795101	0	1	ab989ee5292af30a60ec0513ddc11cf15438035981075b0857e0d057d010c1fb	junction unmappable	0.178337
271675	17	61210001	61220000	0.00720239	0	1	ab989ee5292af30a60ec0513ddc11cf15438035981075b0857e0d057d010c1fb	junction unmappable	0.169734
285042	20	35600001	35610000	0.0205915	1	0	ab989ee5292af30a60ec0513ddc11cf15438035981075b0857e0d057d010c1fb	CN unmappable	0.286995
1159	1	11580001	11590000	0.0332307	1	0	2613d0db5e6407392aa2691ce6db2a4cd350b8258a38f9f6b83844d3b8272685	CN unmappable	0.364586
26997	2	20700001	20710000	14.9979	0	1	2613d0db5e6407392aa2691ce6db2a4cd350b8258a38f9f6b83844d3b8272685	junction unmappable	7.74542
[truncated: 120 more rows]

## Sheet: 1D
label	mbp	type	frac	label.level
CN unmappable	407.415	hg19 101 bp	0.131608	CN unmappable
base unmappable	344.65	hg19 101 bp	0.111333	base unmappable
fully mappable	2343.61	hg19 101 bp	0.757059	fully mappable
CN unmappable	415.42	hg19 150 bp	0.134194	CN unmappable
base unmappable	210.723	hg19 150 bp	0.0680699	base unmappable
fully mappable	2469.53	hg19 150 bp	0.797736	fully mappable
CN unmappable	412.064	hg38 101 bp	0.133429	CN unmappable
base unmappable	341.438	hg38 101 bp	0.11056	base unmappable
fully mappable	2334.77	hg38 101 bp	0.756012	fully mappable
