# Supplementary material for: Most large structural variants in cancer genomes can be detected without long reads
Source: Nat Genet. 2023 Nov 9;55(12):2139–48. doi: 10.1038/s41588-023-01540-6 (PMC10703688; doi:10.1038/s41588-023-01540-6)
Supplement: Supplementary file 9 — Statistical source data for Extended Data Fig. 3. [file 41588_2023_1540_MOESM9_ESM.xlsx]

## Sheet: 3E
method	type	purity.class	median.precision	precision.upper	precision.lower	median.recall	recall.upper	recall.lower	color.levels
JaBbA v1	CN mappable	high purity	0.43617	0.629167	0.211324	0.694444	1	0.5	JaBbA v1 high purity
JaBbA v1	CN mappable	low purity	0.318412	0.452521	0.140476	0.355042	0.573717	0.185897	JaBbA v1 low purity
JaBbA v0	CN mappable	high purity	0.015528	0.0495459	0.00366477	0.512821	0.75	0.291503	JaBbA v0 high purity
JaBbA v0	CN mappable	low purity	0.0064301	0.028398	0	0.115896	0.25	0	JaBbA v0 low purity

## Sheet: 3F
method	median.precision	precision.lower	precision.upper	median.recall	recall.lower	recall.upper	method.level
sequenza	0.245212	0.0963902	0.427707	0.396033	0.333333	0.465741	sequenza
ASCAT	0.0761589	0.017094	0.199336	0.430605	0.272727	0.583333	ASCAT
JaBbA v1	0.792175	0.612455	0.895783	0.946291	0.871262	0.983713	JaBbA v1
TITAN	0.0542943	0.0186723	0.125464	0.4	0.293759	0.5	TITAN
FACETS	0.0636906	0.0235634	0.11183	0.25	0.191991	0.333333	FACETS
JaBbA v0	0.324003	0.0720346	0.676559	0.829288	0.566991	0.924724	JaBbA v0

## Sheet: 3G_TOTAL
pearson.cn	spearman.cn	rmse	pair	query.width	method	purity
0.982719	0.972935	0.25722	sim_1	2750290000	JaBbA v1	1
0.807159	0.861433	2.15005	sim_10	2750290000	JaBbA v1	0.604324
0.709743	0.827709	0.461253	sim_100	2750290000	JaBbA v1	0.826476
0.946382	0.910397	0.667444	sim_101	2750290000	JaBbA v1	0.878798
0.990698	0.995737	0.0761863	sim_102	2750290000	JaBbA v1	0.615282
0.999024	0.99898	0.0301644	sim_103	2750290000	JaBbA v1	0.98101
0.886007	0.878454	0.357514	sim_104	2750290000	JaBbA v1	0.66477
0.953921	0.944609	0.131899	sim_105	2750290000	JaBbA v1	0.860313
0.0797164	0.0823111	0.461837	sim_106	2750290000	JaBbA v1	0.223827
0.979207	0.981525	0.0474579	sim_107	2750290000	JaBbA v1	0.796065
0.369661	0.359683	0.22883	sim_108	2750290000	JaBbA v1	0.744101
0.976708	0.970205	0.24123	sim_109	2750290000	JaBbA v1	0.889151
0.978038	0.978902	0.0632517	sim_11	2750290000	JaBbA v1	0.729402
0.776184	0.856156	0.312771	sim_110	2750290000	JaBbA v1	1
0.998995	0.999269	0.0256896	sim_111	2750290000	JaBbA v1	0.582241
0.937472	0.906779	0.22961	sim_112	2750290000	JaBbA v1	0.838275
0.72822	0.723102	0.237464	sim_113	2750290000	JaBbA v1	0.612104
0.879113	0.929716	0.599706	sim_114	2750290000	JaBbA v1	0.437141
0.959891	0.926766	0.404097	sim_115	2750290000	JaBbA v1	0.86
0.888533	0.865947	0.351208	sim_116	2750290000	JaBbA v1	0.564662
0.833695	0.828365	0.228445	sim_117	2750290000	JaBbA v1	0.55466
0.959112	0.954062	0.128411	sim_118	2750290000	JaBbA v1	0.54599
0.94116	0.939253	0.248841	sim_119	2750290000	JaBbA v1	1
0.840871	0.766707	0.228392	sim_12	2750290000	JaBbA v1	0.700761
0.963286	0.985672	0.0660979	sim_120	2750290000	JaBbA v1	0.917769
0.696257	0.732499	0.724764	sim_121	2750290000	JaBbA v1	0.329325
0.902574	0.916021	0.122998	sim_122	2750290000	JaBbA v1	1
0.995468	0.996324	0.119231	sim_123	2750290000	JaBbA v1	1
0.943582	0.940996	0.407527	sim_124	2750290000	JaBbA v1	0.625519
0.543407	0.715314	0.724092	sim_125	2750290000	JaBbA v1	0.272669
0.89483	0.886477	0.439236	sim_126	2750290000	JaBbA v1	0.683799
0.999388	0.999774	0.0447279	sim_127	2750290000	JaBbA v1	0.786554
0.341915	0.270975	0.479213	sim_128	2750290000	JaBbA v1	0.29
0.972935	0.966223	0.450768	sim_129	2750290000	JaBbA v1	0.909245
0.936669	0.935842	1.2874	sim_13	2750290000	JaBbA v1	0.14
0.995092	0.995067	0.0323913	sim_130	2750290000	JaBbA v1	0.989529
0.962833	0.966517	0.230877	sim_131	2750290000	JaBbA v1	0.737661
0.998221	0.994659	0.103412	sim_132	2750290000	JaBbA v1	0.733376
0.445489	0.668649	1.95741	sim_133	2750290000	JaBbA v1	0.14
-0.0689198	-0.0753723	2.07729	sim_134	2750290000	JaBbA v1	0.826404
0.895176	0.78195	0.44869	sim_135	2750290000	JaBbA v1	0.682461
0.890122	0.862675	0.618262	sim_136	2750290000	JaBbA v1	0.746479
0.998277	0.997989	0.0725054	sim_137	2750290000	JaBbA v1	0.651578
0.985752	0.982274	0.240625	sim_138	2750290000	JaBbA v1	0.917389
0.984669	0.979408	0.143988	sim_139	2750290000	JaBbA v1	0.793126
0.879188	0.881285	0.258115	sim_14	2750290000	JaBbA v1	0.760885
0.929174	0.908515	0.228233	sim_140	2750290000	JaBbA v1	0.844597
0.0414428	0.0415193	0.229301	sim_141	2750290000	JaBbA v1	0.710192
0.791094	0.791189	0.78398	sim_142	2750290000	JaBbA v1	0.393888
0.935627	0.880516	0.459537	sim_143	2750290000	JaBbA v1	0.86
0.996326	0.999283	0.174839	sim_144	2750290000	JaBbA v1	0.979862
0.967713	0.955782	0.337738	sim_145	2750290000	JaBbA v1	0.913307
0.969573	0.800611	0.295068	sim_146	2750290000	JaBbA v1	0.936464
0.999444	0.999654	0.0360804	sim_147	2750290000	JaBbA v1	0.657429
0.980753	0.972128	0.424448	sim_148	2750290000	JaBbA v1	1
0.740595	0.744963	0.239789	sim_149	2750290000	JaBbA v1	0.245767
0.815125	0.937379	0.956653	sim_15	2750290000	JaBbA v1	0.20388
0.485537	0.485459	2.06328	sim_150	2750290000	JaBbA v1	0.937374
0.668565	0.66716	0.235104	sim_151	2750290000	JaBbA v1	0.82536
0.723471	0.710328	0.229167	sim_152	2750290000	JaBbA v1	1
0.803141	0.817393	0.371629	sim_153	2750290000	JaBbA v1	0.492672
0.996599	0.996505	0.0155933	sim_154	2750290000	JaBbA v1	0.919295
0.992006	0.989303	1.08219	sim_155	2750290000	JaBbA v1	0.266097
0.884649	0.945903	0.457527	sim_156	2750290000	JaBbA v1	0.519862
0.522921	0.734779	2.19183	sim_157	2750290000	JaBbA v1	0.791034
0.943066	0.924257	0.231855	sim_158	2750290000	JaBbA v1	1
0.175185	0.192688	0.857695	sim_159	2750290000	JaBbA v1	0.1
0.966187	0.959535	0.434623	sim_16	2750290000	JaBbA v1	0.919395
0.767601	0.855626	0.652845	sim_160	2750290000	JaBbA v1	0.339131
0.775135	0.767426	0.228119	sim_161	2750290000	JaBbA v1	0.828309
0.825158	0.823178	0.238666	sim_162	2750290000	JaBbA v1	0.881212
0.567487	0.787931	0.463967	sim_163	2750290000	JaBbA v1	0.372431
0.875563	0.883379	0.229863	sim_164	2750290000	JaBbA v1	0.761675
0.835356	0.859258	0.45862	sim_165	2750290000	JaBbA v1	0.948585
0.914634	0.968829	1.00533	sim_166	2750290000	JaBbA v1	0.375182
0.946486	0.941397	0.392603	sim_167	2750290000	JaBbA v1	1
0.885773	0.951879	0.456025	sim_168	2750290000	JaBbA v1	0.473909
0.898123	0.839381	0.231075	sim_169	2750290000	JaBbA v1	0.922356
0.935535	0.933803	0.240253	sim_17	2750290000	JaBbA v1	0.739469
0.020866	0.0113006	0.437076	sim_170	2750290000	JaBbA v1	0.209723
0.966075	0.925452	0.232387	sim_171	2750290000	JaBbA v1	0.971931
0.82964	0.892431	0.456306	sim_172	2750290000	JaBbA v1	0.483497
0.900198	0.927068	1.00142	sim_173	2750290000	JaBbA v1	0.491577
0.942579	0.931831	0.798598	sim_174	2750290000	JaBbA v1	0.48032
0.988412	0.99067	0.020628	sim_175	2750290000	JaBbA v1	0.90276
0.996253	0.999215	0.0942398	sim_176	2750290000	JaBbA v1	0.719924
0.962961	0.920037	0.218259	sim_177	2750290000	JaBbA v1	0.979786
0.993476	0.996982	2.00286	sim_178	2750290000	JaBbA v1	0.830074
-0.00192248	-0.00189426	2.06394	sim_179	2750290000	JaBbA v1	0.231211
0.971324	0.987327	0.0316569	sim_18	2750290000	JaBbA v1	0.581804
0.943132	0.935511	0.229402	sim_180	2750290000	JaBbA v1	0.849926
0.864875	0.663415	0.305928	sim_181	2750290000	JaBbA v1	0.887861
0.46031	0.456154	0.228183	sim_182	2750290000	JaBbA v1	0.990056
0.989565	0.995319	0.298593	sim_183	2750290000	JaBbA v1	0.435889
0.820852	0.860467	0.298698	sim_184	2750290000	JaBbA v1	0.566711
0.957393	0.938041	0.272321	sim_185	2750290000	JaBbA v1	0.683831
0.886596	0.848942	0.458166	sim_186	2750290000	JaBbA v1	1
0.997418	0.998977	0.0347593	sim_187	2750290000	JaBbA v1	0.539731
0.998646	0.998227	0.0421206	sim_188	2750290000	JaBbA v1	0.799994
0.998382	0.998081	0.0252093	sim_189	2750290000	JaBbA v1	0.612407
0.684576	0.619237	1.19908	sim_19	2750290000	JaBbA v1	0.287477
0.919295	0.868866	0.749817	sim_190	2750290000	JaBbA v1	0.526432
0.959711	0.982521	0.268156	sim_191	2750290000	JaBbA v1	0.89869
0.795731	0.791213	0.22915	sim_192	2750290000	JaBbA v1	1
0.853824	0.817511	2.03013	sim_193	2750290000	JaBbA v1	0.791998
0.762732	0.84083	0.460982	sim_194	2750290000	JaBbA v1	1
0.584648	0.551963	0.662568	sim_195	2750290000	JaBbA v1	0.449256
0.87475	0.845159	0.189708	sim_196	2750290000	JaBbA v1	0.824689
0.38094	0.352062	1.88272	sim_197	2750290000	JaBbA v1	0.627567
0.99847	0.998705	0.0112413	sim_198	2750290000	JaBbA v1	0.959985
0.773183	0.702502	0.226674	sim_199	2750290000	JaBbA v1	0.659281
0.943328	0.835615	1.99797	sim_2	2750290000	JaBbA v1	0.754893
0.878902	0.874764	0.915449	sim_20	2750290000	JaBbA v1	0.495866
0.883152	0.839347	0.228325	sim_200	2750290000	JaBbA v1	1
0.812113	0.858191	0.82578	sim_201	2750290000	JaBbA v1	0.729961
0.856814	0.899623	0.459004	sim_202	2750290000	JaBbA v1	0.835882
0.999503	0.999385	0.0460018	sim_203	2750290000	JaBbA v1	0.725093
0.926768	0.802167	0.235648	sim_204	2750290000	JaBbA v1	0.862489
0.718936	0.893347	0.48051	sim_205	2750290000	JaBbA v1	0.273873
0.86996	0.726853	0.343634	sim_206	2750290000	JaBbA v1	0.496586
0.912179	0.899724	0.480748	sim_207	2750290000	JaBbA v1	0.584756
0.928533	0.914631	0.410755	sim_208	2750290000	JaBbA v1	0.767613
0.940145	0.942788	0.700185	sim_209	2750290000	JaBbA v1	0.513774
0.988885	0.99676	0.119316	sim_21	2750290000	JaBbA v1	0.859921
0.989173	0.976956	0.249974	sim_210	2750290000	JaBbA v1	0.900874
0.992955	0.997321	0.0303965	sim_211	2750290000	JaBbA v1	0.599189
0.874522	0.8392	0.228369	sim_212	2750290000	JaBbA v1	0.886321
0.557446	0.785264	0.45797	sim_213	2750290000	JaBbA v1	0.427792
0.955779	0.935101	0.374673	sim_214	2750290000	JaBbA v1	1
0.946423	0.990942	0.0995886	sim_215	2750290000	JaBbA v1	0.354162
0.855687	0.83906	0.498884	sim_216	2750290000	JaBbA v1	0.927257
0.954354	0.919403	0.258866	sim_217	2750290000	JaBbA v1	0.258944
0.998885	0.997746	0.0521211	sim_218	2750290000	JaBbA v1	0.87356
-0.000111299	-0.000114936	0.0148615	sim_219	2750290000	JaBbA v1	0.353073
0.781269	0.897247	0.554806	sim_22	2750290000	JaBbA v1	0.303329
0.768611	0.75528	0.228593	sim_220	2750290000	JaBbA v1	0.848152
0.940087	0.920993	0.425122	sim_221	2750290000	JaBbA v1	1
0.848111	0.821692	0.783491	sim_222	2750290000	JaBbA v1	0.312302
0.924475	0.950102	0.42414	sim_223	2750290000	JaBbA v1	0.583136
0.803848	0.800763	0.228401	sim_224	2750290000	JaBbA v1	0.70125
0.967639	0.97815	0.359693	sim_225	2750290000	JaBbA v1	0.624092
0.999152	0.998798	0.0207599	sim_226	2750290000	JaBbA v1	1
0.986183	0.978289	0.229575	sim_227	2750290000	JaBbA v1	0.790102
0.930581	0.955122	0.502038	sim_228	2750290000	JaBbA v1	0.624974
0.0337684	0.034936	0.0357949	sim_229	2750290000	JaBbA v1	0.377983
0.951647	0.934892	0.230804	sim_23	2750290000	JaBbA v1	1
0.999259	0.999702	0.0574927	sim_230	2750290000	JaBbA v1	0.71236
0.93175	0.903809	0.397968	sim_231	2750290000	JaBbA v1	0.858288
0.959734	0.896666	0.231693	sim_232	2750290000	JaBbA v1	0.843926
0.860912	0.884986	0.977423	sim_233	2750290000	JaBbA v1	0.254355
0.983776	0.97596	0.330647	sim_234	2750290000	JaBbA v1	0.867948
0.943495	0.897146	0.78684	sim_235	2750290000	JaBbA v1	0.549273
0.9993	0.999483	0.0352085	sim_236	2750290000	JaBbA v1	0.780694
0.955253	0.940848	0.611595	sim_237	2750290000	JaBbA v1	0.549443
0.992956	0.997265	2.00961	sim_238	2750290000	JaBbA v1	0.614705
0.394181	0.461941	1.06479	sim_239	2750290000	JaBbA v1	0.210031
0.950915	0.90084	0.471658	sim_24	2750290000	JaBbA v1	0.690937
0.738603	0.809851	0.341655	sim_240	2750290000	JaBbA v1	1
0.921038	0.894553	0.454887	sim_241	2750290000	JaBbA v1	0.781936
0.0112776	0.0135423	0.228636	sim_242	2750290000	JaBbA v1	0.66
0.934437	0.908888	0.320768	sim_243	2750290000	JaBbA v1	0.94
0.761111	0.884737	1.38301	sim_244	2750290000	JaBbA v1	0.288315
0.994297	0.997997	1.00056	sim_245	2750290000	JaBbA v1	0.249986
0.998834	0.999133	0.0331873	sim_246	2750290000	JaBbA v1	0.580086
0.963732	0.951198	0.802399	sim_247	2750290000	JaBbA v1	0.571544
0.995929	0.998194	0.0595739	sim_248	2750290000	JaBbA v1	0.952804
0.653437	0.713033	0.812417	sim_249	2750290000	JaBbA v1	0.275604
0.959299	0.959424	0.383831	sim_25	2750290000	JaBbA v1	0.8289
0.413009	0.408859	0.228311	sim_250	2750290000	JaBbA v1	0.675066
0.967848	0.933837	0.705975	sim_251	2750290000	JaBbA v1	0.509227
0.997544	0.997347	0.0149324	sim_252	2750290000	JaBbA v1	1
0.994424	0.996906	0.0637926	sim_253	2750290000	JaBbA v1	0.948937
0.998218	0.999276	0.0580459	sim_254	2750290000	JaBbA v1	0.898025
0.0137643	0.014477	0.389175	sim_255	2750290000	JaBbA v1	0.304968
0.526062	0.406262	0.33806	sim_256	2750290000	JaBbA v1	0.260199
0.821295	0.899938	0.457207	sim_257	2750290000	JaBbA v1	0.453659
0.958837	0.954015	0.228899	sim_258	2750290000	JaBbA v1	0.748709
0.988136	0.997966	1.99993	sim_259	2750290000	JaBbA v1	0.649652
0.983508	0.990365	0.48475	sim_26	2750290000	JaBbA v1	0.507385
0.88752	0.869745	0.518084	sim_260	2750290000	JaBbA v1	0.819398
0.765786	0.761048	2.14945	sim_261	2750290000	JaBbA v1	0.462346
0.764147	0.829024	2.14509	sim_262	2750290000	JaBbA v1	0.967254
0.519101	0.757852	0.457085	sim_263	2750290000	JaBbA v1	0.66114
0.960961	0.944373	0.228077	sim_264	2750290000	JaBbA v1	0.752983
0.974947	0.965617	0.231531	sim_265	2750290000	JaBbA v1	0.67722
0.953762	0.882862	0.463947	sim_266	2750290000	JaBbA v1	0.77652
0.965263	0.926454	0.469418	sim_267	2750290000	JaBbA v1	0.697544
0.999249	0.998775	0.029179	sim_268	2750290000	JaBbA v1	0.950863
0.99782	0.998771	0.0597511	sim_269	2750290000	JaBbA v1	0.916572
0.895694	0.797811	0.624013	sim_27	2750290000	JaBbA v1	0.541571
0.992294	0.993528	0.0724533	sim_270	2750290000	JaBbA v1	0.486144
0.949525	0.887094	0.614092	sim_271	2750290000	JaBbA v1	0.74581
0.700751	0.757928	2.17666	sim_272	2750290000	JaBbA v1	1
0.761092	0.833644	0.457008	sim_273	2750290000	JaBbA v1	0.907184
0.907384	0.945674	0.482834	sim_274	2750290000	JaBbA v1	0.515997
0.682557	0.616094	0.898545	sim_275	2750290000	JaBbA v1	0.868753
0.977566	0.930304	0.241253	sim_276	2750290000	JaBbA v1	0.523134
0.994509	0.998122	0.0789567	sim_277	2750290000	JaBbA v1	0.544336
0.985884	0.995397	0.0606836	sim_278	2750290000	JaBbA v1	0.989865
0.951227	0.955884	0.232866	sim_279	2750290000	JaBbA v1	0.777255
0.0149812	0.0152836	0.329355	sim_28	2750290000	JaBbA v1	0.353897
0.805004	0.881866	4.17462	sim_280	2750290000	JaBbA v1	0.786041
0.92835	0.988037	0.239083	sim_281	2750290000	JaBbA v1	1
0.981426	0.994077	0.130541	sim_282	2750290000	JaBbA v1	0.300182
0.681964	0.849909	0.922335	sim_283	2750290000	JaBbA v1	0.280643
0.975915	0.986285	0.246132	sim_284	2750290000	JaBbA v1	0.854194
0.996163	0.998617	0.0388884	sim_285	2750290000	JaBbA v1	0.557121
0.881332	0.873447	0.457444	sim_286	2750290000	JaBbA v1	0.924617
0.996253	0.99858	0.077342	sim_287	2750290000	JaBbA v1	0.298503
0.96605	0.949296	0.353231	sim_288	2750290000	JaBbA v1	0.952423
0.54768	0.607606	0.281995	sim_289	2750290000	JaBbA v1	0.505645
0.101279	0.0526728	0.396873	sim_29	2750290000	JaBbA v1	0.303491
0.902565	0.856628	0.796527	sim_290	2750290000	JaBbA v1	0.463721
0.965758	0.835699	0.70759	sim_291	2750290000	JaBbA v1	0.46917
0.99646	0.995899	0.0108539	sim_292	2750290000	JaBbA v1	0.789134
0.360647	0.237351	2.08945	sim_293	2750290000	JaBbA v1	0.520887
0.996992	0.997978	0.0762864	sim_294	2750290000	JaBbA v1	0.873565
0.981388	0.971749	0.23546	sim_295	2750290000	JaBbA v1	0.677175
0.869592	0.899784	0.702634	sim_296	2750290000	JaBbA v1	0.468841
0.90309	0.876898	0.228616	sim_297	2750290000	JaBbA v1	0.79
0.910965	0.946596	2.1489	sim_298	2750290000	JaBbA v1	0.771524
0.891498	0.896649	0.704089	sim_299	2750290000	JaBbA v1	0.5237
0.906352	0.899239	0.228578	sim_3	2750290000	JaBbA v1	0.969348
0.656604	0.687108	0.925641	sim_30	2750290000	JaBbA v1	0.16
0.979831	0.989999	0.198305	sim_300	2750290000	JaBbA v1	0.518671
0.988483	0.975859	0.399815	sim_301	2750290000	JaBbA v1	1
0.962604	0.952941	0.229612	sim_302	2750290000	JaBbA v1	0.918372
0.998268	0.999158	0.0640242	sim_303	2750290000	JaBbA v1	0.462689
0.959564	0.946538	0.232617	sim_304	2750290000	JaBbA v1	0.621918
0.898272	0.906713	0.229938	sim_305	2750290000	JaBbA v1	0.710255
0.918955	0.907006	0.168434	sim_306	2750290000	JaBbA v1	0.959169
0.912439	0.914033	0.228863	sim_307	2750290000	JaBbA v1	0.608756
0.975858	0.970654	0.230451	sim_308	2750290000	JaBbA v1	1
0.983401	0.979503	0.268479	sim_309	2750290000	JaBbA v1	0.958941
0.998789	0.99923	0.0823715	sim_31	2750290000	JaBbA v1	0.896305
0.996456	0.996995	0.154512	sim_310	2750290000	JaBbA v1	0.558035
0.33436	0.214444	0.397798	sim_311	2750290000	JaBbA v1	0.333847
0.992101	0.995843	0.172888	sim_312	2750290000	JaBbA v1	0.793784
0.852421	0.855315	0.22814	sim_313	2750290000	JaBbA v1	0.944593
0.882687	0.776314	0.398129	sim_314	2750290000	JaBbA v1	0.746882
-0.107971	0.365542	2.06254	sim_315	2750290000	JaBbA v1	0.11
0.999404	0.999735	0.0776979	sim_316	2750290000	JaBbA v1	0.789506
0.110465	0.107607	1.44863	sim_317	2750290000	JaBbA v1	0.41858
0.576174	0.722493	0.634887	sim_318	2750290000	JaBbA v1	0.31714
0.991697	0.99827	0.0388752	sim_319	2750290000	JaBbA v1	0.498444
0.784252	0.812798	0.931118	sim_32	2750290000	JaBbA v1	0.267263
0.874407	0.870489	0.229924	sim_320	2750290000	JaBbA v1	0.86872
0.660102	0.893555	1.07369	sim_321	2750290000	JaBbA v1	0.240015
0.657076	0.650811	0.228057	sim_322	2750290000	JaBbA v1	0.927771
0.942535	0.878513	0.230024	sim_323	2750290000	JaBbA v1	1
0.999767	0.999735	0.0150183	sim_324	2750290000	JaBbA v1	0.668238
0.963883	0.940388	0.320566	sim_325	2750290000	JaBbA v1	1
0.632823	0.664973	0.830863	sim_326	2750290000	JaBbA v1	0.318056
0.985981	0.993301	0.0612608	sim_327	2750290000	JaBbA v1	0.643557
0.736586	0.85964	0.45686	sim_328	2750290000	JaBbA v1	0.457494
0.875467	0.983066	0.454791	sim_329	2750290000	JaBbA v1	0.782708
0.998733	0.998335	0.040203	sim_33	2750290000	JaBbA v1	1
0.998131	0.999281	0.0307235	sim_330	2750290000	JaBbA v1	1
0.974441	0.960788	0.466228	sim_331	2750290000	JaBbA v1	0.917513
0.923842	0.925125	0.330828	sim_332	2750290000	JaBbA v1	0.714814
0.244696	0.208401	0.8079	sim_333	2750290000	JaBbA v1	0.269886
0.0721506	0.0722324	0.251752	sim_334	2750290000	JaBbA v1	0.333647
0.819955	0.917522	0.934209	sim_335	2750290000	JaBbA v1	0.38
0.940664	0.948455	0.485446	sim_336	2750290000	JaBbA v1	0.613136
0.992902	0.998742	0.0331986	sim_337	2750290000	JaBbA v1	1
0.893743	0.8675	0.452682	sim_338	2750290000	JaBbA v1	0.989764
0.88283	0.880506	0.228598	sim_339	2750290000	JaBbA v1	0.653577
0.999583	0.999311	0.0347759	sim_34	2750290000	JaBbA v1	0.688112
0.998827	0.998775	0.0612401	sim_340	2750290000	JaBbA v1	1
0.870567	0.660631	0.795774	sim_341	2750290000	JaBbA v1	0.836994
0.141522	0.143398	0.22819	sim_342	2750290000	JaBbA v1	0.717932
0.948305	0.939992	0.229514	sim_343	2750290000	JaBbA v1	0.969352
0.999779	0.99963	0.0117872	sim_344	2750290000	JaBbA v1	0.660166
0.92044	0.884037	0.228218	sim_345	2750290000	JaBbA v1	1
0.750164	0.897939	2.15687	sim_346	2750290000	JaBbA v1	0.373276
0.907045	0.934582	0.502159	sim_347	2750290000	JaBbA v1	0.786751
0.962722	0.931118	0.275775	sim_348	2750290000	JaBbA v1	0.893937
0.976487	0.966863	0.230802	sim_349	2750290000	JaBbA v1	0.795595
0.970567	0.966515	0.982552	sim_35	2750290000	JaBbA v1	0.191492
0.930957	0.973139	2.15228	sim_350	2750290000	JaBbA v1	0.779156
0.958936	0.938926	0.269883	sim_351	2750290000	JaBbA v1	0.693103
0.949965	0.927676	0.230984	sim_352	2750290000	JaBbA v1	0.575592
0.984581	0.994515	2.00112	sim_353	2750290000	JaBbA v1	0.9434
0.958785	0.9384	0.431354	sim_354	2750290000	JaBbA v1	1
0.99681	0.997	0.0437267	sim_355	2750290000	JaBbA v1	1
0.965933	0.980354	0.256642	sim_356	2750290000	JaBbA v1	0.229286
0.999998	0.999988	0.000776675	sim_357	2750290000	JaBbA v1	0.959103
0.973612	0.967497	0.251585	sim_358	2750290000	JaBbA v1	0.275733
0.872347	0.874157	0.227956	sim_359	2750290000	JaBbA v1	0.634337
0.983082	0.997015	0.116589	sim_36	2750290000	JaBbA v1	0.677426
0.920675	0.905491	0.776099	sim_360	2750290000	JaBbA v1	0.543064
0.999291	0.999795	0.0510645	sim_361	2750290000	JaBbA v1	1
0.999634	0.999232	0.0187157	sim_362	2750290000	JaBbA v1	0.92076
0.1688	0.0853435	0.389973	sim_363	2750290000	JaBbA v1	0.225963
0.953809	0.942455	0.228353	sim_364	2750290000	JaBbA v1	1
0.973365	0.882935	0.332314	sim_365	2750290000	JaBbA v1	0.729391
0.998956	0.999676	0.0598013	sim_366	2750290000	JaBbA v1	0.875355
0.999227	0.999035	0.0400945	sim_367	2750290000	JaBbA v1	0.928555
0.884078	0.891395	0.439916	sim_368	2750290000	JaBbA v1	0.80412
0.994642	0.994652	0.0143887	sim_369	2750290000	JaBbA v1	0.727682
0.974988	0.976982	0.248738	sim_37	2750290000	JaBbA v1	0.452925
-0.376504	-0.410888	0.475091	sim_370	2750290000	JaBbA v1	0.226751
0.895857	0.721164	0.228864	sim_371	2750290000	JaBbA v1	0.741284
0.956487	0.903685	0.22837	sim_372	2750290000	JaBbA v1	0.622521
0.924078	0.891816	0.228545	sim_373	2750290000	JaBbA v1	1
0.635635	0.710955	0.802184	sim_374	2750290000	JaBbA v1	0.3
0.921613	0.939824	0.47585	sim_375	2750290000	JaBbA v1	0.949156
0.896931	0.89959	0.199338	sim_376	2750290000	JaBbA v1	0.610147
0.997706	0.996841	0.14048	sim_377	2750290000	JaBbA v1	0.989991
0.683842	0.677894	0.889904	sim_378	2750290000	JaBbA v1	0.318313
0.961667	0.935206	0.735865	sim_379	2750290000	JaBbA v1	0.540685
0.964318	0.951028	0.231657	sim_38	2750290000	JaBbA v1	0.676738
0.968878	0.953076	0.262553	sim_380	2750290000	JaBbA v1	0.407444
0.470191	0.323023	0.387159	sim_381	2750290000	JaBbA v1	0.334534
0.984902	0.974644	0.320946	sim_382	2750290000	JaBbA v1	1
0.0233341	0.034805	1.12486	sim_383	2750290000	JaBbA v1	0.206056
0.999523	0.9994	0.01289	sim_384	2750290000	JaBbA v1	1
0.908103	0.893456	0.231823	sim_385	2750290000	JaBbA v1	0.714667
0.879587	0.84916	0.228462	sim_386	2750290000	JaBbA v1	0.742278
-0.00264054	-0.00311062	0.372319	sim_387	2750290000	JaBbA v1	0.274961
0.887143	0.868077	1.67135	sim_388	2750290000	JaBbA v1	0.265269
0.907657	0.924219	1.00243	sim_389	2750290000	JaBbA v1	0.28507
0.775281	0.907638	0.630385	sim_39	2750290000	JaBbA v1	0.482519
0.989728	0.996001	0.0575183	sim_390	2750290000	JaBbA v1	0.865282
0.876006	0.87864	0.467036	sim_391	2750290000	JaBbA v1	0.718025
0.999704	0.999747	0.0289459	sim_392	2750290000	JaBbA v1	0.722832
0.958875	0.890678	0.229228	sim_393	2750290000	JaBbA v1	0.681826
0.0288035	0.027097	0.255405	sim_394	2750290000	JaBbA v1	0.41697
0.878844	0.898028	1.02934	sim_395	2750290000	JaBbA v1	0.35
0.892613	0.840166	0.457079	sim_396	2750290000	JaBbA v1	0.641664
0.802172	0.870641	0.688948	sim_397	2750290000	JaBbA v1	0.430104
0.439439	0.449076	0.0349053	sim_398	2750290000	JaBbA v1	0.796021
0.998997	0.998276	0.0480809	sim_399	2750290000	JaBbA v1	0.647736
0.993139	0.997058	0.0602009	sim_4	2750290000	JaBbA v1	0.564132
0.785359	0.644104	0.489906	sim_40	2750290000	JaBbA v1	0.78692
0.331309	0.411904	0.456223	sim_400	2750290000	JaBbA v1	0.862223
0.922337	0.908572	0.456531	sim_401	2750290000	JaBbA v1	0.924917
0.910601	0.883764	0.933441	sim_402	2750290000	JaBbA v1	0.413632
0.924834	0.885241	0.273704	sim_403	2750290000	JaBbA v1	0.838234
0.762982	0.688527	0.596389	sim_404	2750290000	JaBbA v1	0.826076
0.998485	0.998516	0.0395804	sim_405	2750290000	JaBbA v1	1
0.939102	0.938489	0.458899	sim_406	2750290000	JaBbA v1	0.743091
0.5765	0.783649	0.459251	sim_407	2750290000	JaBbA v1	0.401019
0.998631	0.998468	0.0166249	sim_408	2750290000	JaBbA v1	0.745554
0.998805	0.997529	0.0282206	sim_409	2750290000	JaBbA v1	1
0.93726	0.91036	0.539881	sim_41	2750290000	JaBbA v1	0.261594
0.923763	0.642431	0.313668	sim_410	2750290000	JaBbA v1	0.317948
0.994108	0.995594	0.177849	sim_411	2750290000	JaBbA v1	0.843489
0.86935	0.772019	0.462147	sim_412	2750290000	JaBbA v1	0.687048
0.999145	0.999166	0.0509837	sim_413	2750290000	JaBbA v1	0.865852
0.869276	0.962353	0.523128	sim_414	2750290000	JaBbA v1	0.377782
0.763735	0.628253	0.360951	sim_415	2750290000	JaBbA v1	0.65493
0.960777	0.945168	0.344733	sim_416	2750290000	JaBbA v1	0.968936
0.852882	0.860176	0.708726	sim_417	2750290000	JaBbA v1	0.458258
0.885113	0.814905	0.228323	sim_418	2750290000	JaBbA v1	0.884539
0.874631	0.830445	0.230614	sim_419	2750290000	JaBbA v1	0.960266
0.998613	0.99846	0.0108655	sim_42	2750290000	JaBbA v1	0.948935
0.697855	0.837838	0.508951	sim_420	2750290000	JaBbA v1	0.336706
0.997689	0.998821	0.0791561	sim_421	2750290000	JaBbA v1	0.826121
0.946996	0.925955	0.231675	sim_422	2750290000	JaBbA v1	1
0.145139	0.139269	0.228636	sim_423	2750290000	JaBbA v1	1
0.964856	0.931087	0.228755	sim_424	2750290000	JaBbA v1	0.935687
0.673917	0.417726	0.228077	sim_425	2750290000	JaBbA v1	0.885385
0.908731	0.918847	0.825219	sim_426	2750290000	JaBbA v1	0.786417
0.997676	0.997601	0.0182152	sim_427	2750290000	JaBbA v1	0.744315
0.863674	0.860677	0.0167801	sim_428	2750290000	JaBbA v1	0.897864
0.949967	0.939922	0.486927	sim_429	2750290000	JaBbA v1	0.641856
0.996893	0.997795	0.0172993	sim_43	2750290000	JaBbA v1	0.721808
0.352776	0.346445	0.240149	sim_430	2750290000	JaBbA v1	0.611356
0.999362	0.999667	0.0353557	sim_431	2750290000	JaBbA v1	0.766062
0.621608	0.720647	0.700072	sim_432	2750290000	JaBbA v1	0.197344
0.995423	0.998006	0.0477354	sim_433	2750290000	JaBbA v1	0.635996
0.878087	0.917058	0.535226	sim_434	2750290000	JaBbA v1	0.530374
0.994209	0.997013	0.134016	sim_435	2750290000	JaBbA v1	0.949189
0.635495	0.78398	0.484725	sim_436	2750290000	JaBbA v1	0.567143
0.0076794	0.00802517	0.234607	sim_437	2750290000	JaBbA v1	0.268902
0.875942	0.887223	0.228382	sim_438	2750290000	JaBbA v1	0.867552
0.90105	0.9634	0.997245	sim_439	2750290000	JaBbA v1	0.552052
0.92902	0.900691	0.208546	sim_44	2750290000	JaBbA v1	0.889603
0.995138	0.995577	0.129155	sim_440	2750290000	JaBbA v1	0.830902
0.973418	0.979549	0.247837	sim_441	2750290000	JaBbA v1	0.818271
0.835122	0.823505	0.46877	sim_442	2750290000	JaBbA v1	0.725204
0.519987	0.54922	1.31721	sim_443	2750290000	JaBbA v1	0.192515
0.885846	0.86552	0.228487	sim_444	2750290000	JaBbA v1	0.817106
0.82303	0.853402	0.552055	sim_445	2750290000	JaBbA v1	1
0.794956	0.887065	0.459105	sim_446	2750290000	JaBbA v1	0.422425
0.882938	0.878471	0.231809	sim_447	2750290000	JaBbA v1	0.823593
0.878589	0.846095	1.96059	sim_448	2750290000	JaBbA v1	0.744323
0.229852	0.311629	0.537376	sim_449	2750290000	JaBbA v1	0.389723
0.601931	0.637693	0.45786	sim_45	2750290000	JaBbA v1	0.517582
0.959136	0.951311	0.390908	sim_450	2750290000	JaBbA v1	1
0.847731	0.907219	0.45738	sim_451	2750290000	JaBbA v1	0.385513
0.979515	0.971353	0.231275	sim_452	2750290000	JaBbA v1	0.633354
0.899868	0.894754	0.46161	sim_453	2750290000	JaBbA v1	0.629795
0.842424	0.867503	0.94189	sim_454	2750290000	JaBbA v1	0.265704
0.993941	0.99804	0.160248	sim_455	2750290000	JaBbA v1	1
0.641376	0.635073	1.83864	sim_456	2750290000	JaBbA v1	0.83
0.921681	0.921991	0.447985	sim_457	2750290000	JaBbA v1	0.940748
0.929985	0.898731	0.458266	sim_458	2750290000	JaBbA v1	0.714633
0.55551	0.561073	0.299642	sim_459	2750290000	JaBbA v1	0.638617
0.999372	0.998586	0.0146759	sim_46	2750290000	JaBbA v1	0.861985
0.98825	0.985766	0.14321	sim_460	2750290000	JaBbA v1	0.592665
0.93957	0.981843	0.254325	sim_461	2750290000	JaBbA v1	1
0.430051	0.658155	2.15147	sim_462	2750290000	JaBbA v1	0.84806
0.685201	0.834358	2.15083	sim_463	2750290000	JaBbA v1	0.912713
0.670407	0.699932	2.15057	sim_464	2750290000	JaBbA v1	0.89344
0.757573	0.862985	2.25647	sim_465	2750290000	JaBbA v1	0.890469
0.995336	0.996867	0.152878	sim_466	2750290000	JaBbA v1	0.781782
0.929275	0.864248	0.450346	sim_467	2750290000	JaBbA v1	0.887043
0.480229	0.444884	0.720302	sim_468	2750290000	JaBbA v1	0.427608
0.888527	0.866037	0.228229	sim_469	2750290000	JaBbA v1	0.863679
0.732313	0.657432	0.866664	sim_47	2750290000	JaBbA v1	0.363221
0.786393	0.780099	0.22809	sim_470	2750290000	JaBbA v1	0.673408
0.999004	0.998709	0.0466184	sim_471	2750290000	JaBbA v1	0.540079
0.959651	0.951349	0.232339	sim_472	2750290000	JaBbA v1	1
0.907996	0.930098	0.796386	sim_473	2750290000	JaBbA v1	0.327754
-0.0268798	-0.0268796	0.255477	sim_474	2750290000	JaBbA v1	0.223459
0.330339	0.318369	0.230102	sim_475	2750290000	JaBbA v1	0.814209
0.995895	0.996954	0.146139	sim_476	2750290000	JaBbA v1	0.874726
0.974886	0.954897	0.55552	sim_477	2750290000	JaBbA v1	0.698743
0.939864	0.895873	0.228855	sim_478	2750290000	JaBbA v1	0.760167
0.843346	0.898913	2.19953	sim_479	2750290000	JaBbA v1	0.67
0.999588	0.999644	0.0218849	sim_48	2750290000	JaBbA v1	0.699813
0.995183	0.996714	2.99131	sim_480	2750290000	JaBbA v1	0.447337
0.948531	0.962945	0.446361	sim_481	2750290000	JaBbA v1	0.46334
0.923178	0.899197	0.450912	sim_482	2750290000	JaBbA v1	0.563594
0.905746	0.941493	0.412937	sim_483	2750290000	JaBbA v1	0.892015
0.769379	0.81288	0.817077	sim_484	2750290000	JaBbA v1	0.389492
0.984353	0.975203	0.233112	sim_485	2750290000	JaBbA v1	0.989782
0.826136	0.95533	0.689708	sim_486	2750290000	JaBbA v1	0.416898
0.961412	0.95328	0.238219	sim_487	2750290000	JaBbA v1	1
0.968695	0.944407	0.231173	sim_488	2750290000	JaBbA v1	0.609243
0.572513	0.443525	0.902437	sim_489	2750290000	JaBbA v1	0.23822
0.948221	0.934	0.443024	sim_49	2750290000	JaBbA v1	0.767859
0.00670459	0.0103184	2.10556	sim_490	2750290000	JaBbA v1	0.322311
0.716332	0.79945	2.14614	sim_491	2750290000	JaBbA v1	0.633081
0.98778	0.995485	0.0595153	sim_492	2750290000	JaBbA v1	0.77535
0.911369	0.910024	0.76495	sim_493	2750290000	JaBbA v1	0.516871
0.871201	0.92149	0.458045	sim_494	2750290000	JaBbA v1	0.69459
0.73644	0.823393	0.457451	sim_495	2750290000	JaBbA v1	0.405209
0.867401	0.871304	0.501863	sim_496	2750290000	JaBbA v1	0.52926
0.751504	0.869775	0.68605	sim_497	2750290000	JaBbA v1	0.41
0.857708	0.794393	0.803843	sim_498	2750290000	JaBbA v1	0.276281
0.96072	0.953193	0.230095	sim_499	2750290000	JaBbA v1	0.766823
0.676723	0.616901	0.701497	sim_5	2750290000	JaBbA v1	0.292948
0.00642351	0.0108775	0.228345	sim_50	2750290000	JaBbA v1	0.763648
0.992167	0.992065	0.0184283	sim_500	2750290000	JaBbA v1	0.896056
0.901495	0.866169	0.467953	sim_51	2750290000	JaBbA v1	0.927638
0.950488	0.992695	0.959041	sim_52	2750290000	JaBbA v1	0.416136
0.988421	0.990703	0.0785493	sim_53	2750290000	JaBbA v1	0.69
0.915987	0.977558	0.0951858	sim_54	2750290000	JaBbA v1	0.504846
0.0827068	0.0843127	1.86846	sim_55	2750290000	JaBbA v1	0.12
0.0198228	0.0199213	0.262634	sim_56	2750290000	JaBbA v1	0.367913
0.611298	0.693046	0.668646	sim_57	2750290000	JaBbA v1	0.279907
0.996457	0.998136	0.0746593	sim_58	2750290000	JaBbA v1	0.339236
0.998238	0.997862	0.0461219	sim_59	2750290000	JaBbA v1	0.919026
0.941546	0.911267	0.333114	sim_6	2750290000	JaBbA v1	0.801615
0.959793	0.925774	0.232596	sim_60	2750290000	JaBbA v1	0.91783
0.998259	0.999077	0.0658236	sim_61	2750290000	JaBbA v1	0.627691
0.801168	0.770602	0.96301	sim_62	2750290000	JaBbA v1	0.329397
0.892621	0.751284	0.228801	sim_63	2750290000	JaBbA v1	0.746104
0.977228	0.955868	0.416165	sim_64	2750290000	JaBbA v1	0.724349
0.922888	0.918553	0.505191	sim_65	2750290000	JaBbA v1	0.653693
0.998467	0.99876	0.0526405	sim_66	2750290000	JaBbA v1	1
0.647688	0.63755	0.229045	sim_67	2750290000	JaBbA v1	1
0.553389	0.833424	2.38329	sim_68	2750290000	JaBbA v1	0.515443
0.711376	0.795678	2.15179	sim_69	2750290000	JaBbA v1	0.934751
0.905856	0.900649	0.521607	sim_7	2750290000	JaBbA v1	0.754866
0.898665	0.85257	0.905872	sim_70	2750290000	JaBbA v1	0.348559
0.955475	0.916338	0.0831097	sim_71	2750290000	JaBbA v1	0.389035
0.917575	0.865572	0.231627	sim_72	2750290000	JaBbA v1	0.635623
0.865636	0.828505	0.229455	sim_73	2750290000	JaBbA v1	0.621706
0.998516	0.998852	0.0618884	sim_74	2750290000	JaBbA v1	0.683652
0.998226	0.99881	0.0924919	sim_75	2750290000	JaBbA v1	1
0.794191	0.786091	0.228249	sim_76	2750290000	JaBbA v1	0.694886
0.803049	0.869309	0.460418	sim_77	2750290000	JaBbA v1	0.417966
0.943522	0.942056	0.765899	sim_78	2750290000	JaBbA v1	0.345368
0.920269	0.913913	0.559314	sim_79	2750290000	JaBbA v1	0.808894
0.861044	0.857314	2.15707	sim_8	2750290000	JaBbA v1	0.802454
0.34805	0.348033	1.95681	sim_80	2750290000	JaBbA v1	0.437851
0.665549	0.884893	2.25767	sim_81	2750290000	JaBbA v1	0.640787
0.406514	0.413524	0.362813	sim_82	2750290000	JaBbA v1	0.692884
0.804502	0.798613	0.253169	sim_83	2750290000	JaBbA v1	0.544421
0.999001	0.999307	0.0430875	sim_84	2750290000	JaBbA v1	0.9694
0.944017	0.946567	0.505973	sim_85	2750290000	JaBbA v1	0.76663
0.965995	0.963973	0.229151	sim_86	2750290000	JaBbA v1	0.938751
0.999997	0.99999	0.000973892	sim_87	2750290000	JaBbA v1	0.826133
0.830837	0.935568	0.832271	sim_88	2750290000	JaBbA v1	0.967223
0.984567	0.983323	0.0926099	sim_89	2750290000	JaBbA v1	0.791668
0.998138	0.999189	0.0395829	sim_9	2750290000	JaBbA v1	0.784922
0.650787	0.684751	0.316755	sim_90	2750290000	JaBbA v1	0.402183
0.859997	0.928448	0.687366	sim_91	2750290000	JaBbA v1	0.444439
0.998745	0.999224	0.0470957	sim_92	2750290000	JaBbA v1	0.590287
0.330637	0.319843	0.239647	sim_93	2750290000	JaBbA v1	0.617735
0.999342	0.999908	0.0473545	sim_94	2750290000	JaBbA v1	0.58003
0.787872	0.881833	0.46876	sim_95	2750290000	JaBbA v1	0.509099
0.993585	0.995112	0.31175	sim_96	2750290000	JaBbA v1	0.488378
0.950022	0.940805	0.500989	sim_97	2750290000	JaBbA v1	0.76516
0.660271	0.856809	0.459473	sim_98	2750290000	JaBbA v1	0.397565
0.880934	0.798674	0.42898	sim_99	2750290000	JaBbA v1	0.700552
0.994286	0.997229	0.141711	sim_1	2749890000	ASCAT	1
0.747321	0.865157	2.13157	sim_10	2750260000	ASCAT	0.604324
0.938372	0.919947	0.172261	sim_100	2750280000	ASCAT	0.826476
0.912129	0.852602	0.815428	sim_101	2749470000	ASCAT	0.878798
0.993636	0.996224	0.0634895	sim_102	2750290000	ASCAT	0.615282
0.828991	0.863683	0.456443	sim_103	2750260000	ASCAT	0.98101
0.778489	0.745886	0.491588	sim_104	2747900000	ASCAT	0.66477
0.99569	0.99638	0.0405438	sim_105	2750290000	ASCAT	0.860313
0.572799	0.597302	0.982927	sim_106	2750260000	ASCAT	0.223827
0.382722	0.596925	0.522052	sim_107	2748470000	ASCAT	0.796065
0.341682	0.324864	0.261615	sim_108	2749410000	ASCAT	0.744101
0.858087	0.792583	0.646522	sim_109	2747900000	ASCAT	0.889151
0.557164	0.766918	0.4583	sim_11	2750260000	ASCAT	0.729402
0.981426	0.978429	0.0919156	sim_110	2750280000	ASCAT	1
0.96228	0.945088	0.157316	sim_111	2750290000	ASCAT	0.582241
0.986503	0.997753	0.0981299	sim_112	2750290000	ASCAT	0.838275
0.977032	0.982539	0.0555312	sim_113	2750290000	ASCAT	0.612104
0.930522	0.960758	0.393582	sim_114	2750290000	ASCAT	0.437141
0.968174	0.975589	0.345127	sim_115	2750290000	ASCAT	0.86
0.758337	0.759996	0.542233	sim_116	2750290000	ASCAT	0.564662
0.73835	0.785695	0.230023	sim_117	2750290000	ASCAT	0.55466
0.488462	0.63885	0.744839	sim_118	2750250000	ASCAT	0.54599
0.948511	0.958258	0.239481	sim_119	2750240000	ASCAT	1
0.987829	0.993893	0.0544865	sim_12	2750290000	ASCAT	0.700761
0.886262	0.976355	0.125717	sim_120	2749920000	ASCAT	0.917769
0.660222	0.633051	0.816653	sim_121	2750290000	ASCAT	0.329325
0.731865	0.674522	0.258809	sim_122	2750290000	ASCAT	1
0.844954	0.972703	0.913117	sim_123	2743020000	ASCAT	1
0.973981	0.984778	0.264815	sim_124	2748470000	ASCAT	0.625519
0.512314	0.640986	0.779039	sim_125	2750260000	ASCAT	0.272669
0.933047	0.907542	0.493614	sim_127	2750260000	ASCAT	0.786554
0.533107	0.55468	0.504765	sim_128	2750210000	ASCAT	0.29
0.992306	0.997678	0.235304	sim_129	2750290000	ASCAT	0.909245
0.44212	0.587108	1.86639	sim_13	2750290000	ASCAT	0.14
0.45662	0.591657	0.648952	sim_130	2750290000	ASCAT	0.989529
0.993818	0.997519	0.0847886	sim_131	2750280000	ASCAT	0.737661
0.918693	0.880651	0.710641	sim_132	2750290000	ASCAT	0.733376
0.566301	0.640373	1.66697	sim_133	2750290000	ASCAT	0.14
0.379705	0.350301	1.96004	sim_134	2750290000	ASCAT	0.826404
0.966765	0.934055	0.242001	sim_135	2750290000	ASCAT	0.682461
0.8337	0.885028	0.754704	sim_136	2750290000	ASCAT	0.746479
0.799507	0.918356	0.896904	sim_137	2750290000	ASCAT	0.651578
0.888198	0.897014	0.689402	sim_138	2750290000	ASCAT	0.917389
0.909948	0.963881	0.382394	sim_139	2747900000	ASCAT	0.793126
0.992509	0.996222	0.0599219	sim_14	2750280000	ASCAT	0.760885
0.961366	0.947747	0.155212	sim_140	2750290000	ASCAT	0.844597
0.408805	0.658422	0.0574856	sim_141	2750290000	ASCAT	0.710192
0.824889	0.80819	0.62162	sim_142	2750290000	ASCAT	0.393888
0.987802	0.975601	0.186707	sim_143	2750290000	ASCAT	0.86
0.991731	0.992449	0.259157	sim_144	2750290000	ASCAT	0.979862
0.999999	0.999972	0.000962562	sim_146	2750290000	ASCAT	0.936464
0.784203	0.868479	0.776396	sim_147	2750260000	ASCAT	0.657429
0.986228	0.987473	0.336899	sim_148	2749790000	ASCAT	1
0.192303	0.439914	0.713044	sim_149	2747900000	ASCAT	0.245767
0.664133	0.619273	1.08664	sim_15	2750290000	ASCAT	0.20388
0.434167	0.450475	2.05612	sim_150	2750260000	ASCAT	0.937374
0.978933	0.988775	0.0418788	sim_151	2748470000	ASCAT	0.82536
0.719613	0.706908	0.231356	sim_152	2750260000	ASCAT	1
0.346585	0.386637	1.12877	sim_153	2748430000	ASCAT	0.492672
0.316831	0.429566	0.518379	sim_154	2750290000	ASCAT	0.919295
0.571956	0.65565	2.38489	sim_155	2750290000	ASCAT	0.266097
0.852354	0.932744	0.42676	sim_156	2750260000	ASCAT	0.519862
0.472245	0.861059	2.18189	sim_157	2749890000	ASCAT	0.791034
0.874836	0.997229	0.305446	sim_158	2694030000	ASCAT	1
0.171852	0.124146	0.86569	sim_159	2750290000	ASCAT	0.1
0.957555	0.971369	0.47927	sim_16	2750290000	ASCAT	0.919395
0.880973	0.868005	0.530746	sim_160	2750280000	ASCAT	0.339131
0.974103	0.992966	0.0649425	sim_161	2750290000	ASCAT	0.828309
0.47566	0.439347	0.444189	sim_162	2750250000	ASCAT	0.881212
0.637754	0.645174	0.279847	sim_163	2750290000	ASCAT	0.372431
0.984202	0.993396	0.0703558	sim_164	2749920000	ASCAT	0.761675
0.782077	0.736543	0.542937	sim_165	2750290000	ASCAT	0.948585
0.841861	0.789956	0.783258	sim_166	2750290000	ASCAT	0.375182
0.913825	0.906801	0.498468	sim_167	2748470000	ASCAT	1
0.764542	0.75054	0.544294	sim_168	2750260000	ASCAT	0.473909
0.993265	0.995482	0.053697	sim_169	2750290000	ASCAT	0.922356
0.992795	0.997169	0.0721742	sim_17	2750290000	ASCAT	0.739469
0.508997	0.511921	0.360012	sim_170	2750290000	ASCAT	0.209723
0.957972	0.921754	0.259795	sim_171	2748470000	ASCAT	0.971931
0.903244	0.846543	0.284385	sim_172	2750290000	ASCAT	0.483497
0.828443	0.688674	0.646015	sim_173	2750290000	ASCAT	0.491577
0.916689	0.894789	0.943559	sim_174	2749980000	ASCAT	0.48032
0.587533	0.422318	0.496283	sim_175	2750290000	ASCAT	0.90276
0.835349	0.937224	0.717226	sim_176	2750260000	ASCAT	0.719924
0.565673	0.722953	1.07517	sim_177	2750260000	ASCAT	0.979786
0.563095	0.899505	2.01037	sim_178	2748460000	ASCAT	0.830074
-0.00118966	-0.00183029	2.0781	sim_179	2750260000	ASCAT	0.231211
0.917877	0.940987	0.0556243	sim_18	2750290000	ASCAT	0.581804
0.99529	0.997406	0.060213	sim_180	2750290000	ASCAT	0.849926
0.295386	0.372562	0.596542	sim_181	2747900000	ASCAT	0.887861
0.931174	0.967594	0.0466731	sim_182	2750290000	ASCAT	0.990056
0.753845	0.824511	1.14984	sim_183	2750290000	ASCAT	0.435889
0.693385	0.724661	0.362911	sim_184	2750250000	ASCAT	0.566711
0.76236	0.724874	0.614194	sim_185	2750290000	ASCAT	0.683831
0.81847	0.782966	0.598111	sim_186	2750290000	ASCAT	1
0.753614	0.718329	0.336695	sim_187	2750290000	ASCAT	0.539731
0.692726	0.803658	0.790538	sim_188	2748520000	ASCAT	0.799994
0.628793	0.632704	0.494011	sim_189	2750290000	ASCAT	0.612407
0.691831	0.700186	1.16119	sim_19	2750290000	ASCAT	0.287477
0.771811	0.840708	1.01978	sim_190	2750290000	ASCAT	0.526432
0.661661	0.997123	0.885765	sim_191	2750290000	ASCAT	0.89869
0.539754	0.508769	0.464665	sim_192	2750290000	ASCAT	1
0.958773	0.992013	2.09426	sim_193	2750290000	ASCAT	0.791998
0.946475	0.967966	0.19165	sim_194	2750290000	ASCAT	1
0.248699	0.197454	1.27782	sim_195	2750290000	ASCAT	0.449256
0.994538	0.996078	0.0402646	sim_196	2750280000	ASCAT	0.824689
0.297597	0.281482	1.16304	sim_197	2750290000	ASCAT	0.627567
0.363271	0.574381	0.478075	sim_198	2750280000	ASCAT	0.959985
0.568085	0.531034	0.387068	sim_199	2748920000	ASCAT	0.659281
0.206892	0.314975	1.94544	sim_2	2750260000	ASCAT	0.754893
0.956839	0.926042	0.586112	sim_20	2750290000	ASCAT	0.495866
0.876122	0.835264	0.235874	sim_200	2750250000	ASCAT	1
0.786602	0.887818	0.595949	sim_202	2750250000	ASCAT	0.835882
0.983366	0.97894	0.266032	sim_203	2750290000	ASCAT	0.725093
0.725141	0.799755	0.539187	sim_204	2749180000	ASCAT	0.862489
0.897424	0.935043	1.02797	sim_205	2748470000	ASCAT	0.273873
0.500623	0.532779	0.363605	sim_206	2747900000	ASCAT	0.496586
0.824121	0.807979	0.557044	sim_207	2750290000	ASCAT	0.584756
0.844956	0.842883	0.634837	sim_208	2750290000	ASCAT	0.767613
0.870368	0.849756	1.01739	sim_209	2750290000	ASCAT	0.513774
0.552286	0.6855	1.04055	sim_21	2747900000	ASCAT	0.859921
0.979631	0.98251	0.331528	sim_210	2750290000	ASCAT	0.900874
0.458543	0.48186	0.40605	sim_211	2750290000	ASCAT	0.599189
0.847136	0.831171	0.256274	sim_212	2750250000	ASCAT	0.886321
0.678719	0.694441	0.26303	sim_213	2750260000	ASCAT	0.427792
0.974391	0.970041	0.270988	sim_214	2735230000	ASCAT	1
0.72664	0.632017	0.50375	sim_215	2750290000	ASCAT	0.354162
0.974282	0.994494	0.195933	sim_216	2749120000	ASCAT	0.927257
0.262779	0.335971	1.30196	sim_217	2750290000	ASCAT	0.258944
0.993654	0.998506	0.124953	sim_218	2750290000	ASCAT	0.87356
0.0218036	0.0435745	0.45802	sim_219	2750260000	ASCAT	0.353073
0.548172	0.580075	0.679731	sim_22	2750290000	ASCAT	0.303329
0.865115	0.987218	0.150176	sim_220	2750290000	ASCAT	0.848152
0.997418	0.99832	0.0852394	sim_221	2740080000	ASCAT	1
0.467989	0.758643	1.46263	sim_222	2750260000	ASCAT	0.312302
0.880253	0.945256	0.481204	sim_223	2750290000	ASCAT	0.583136
0.98876	0.992794	0.0479166	sim_224	2750290000	ASCAT	0.70125
0.957483	0.968078	0.337234	sim_225	2750290000	ASCAT	0.624092
0.732078	0.837733	0.46226	sim_226	2750250000	ASCAT	1
0.996827	0.99899	0.102484	sim_227	2750290000	ASCAT	0.790102
0.929694	0.937554	0.435317	sim_228	2750290000	ASCAT	0.624974
0.0600584	0.118474	0.457317	sim_229	2750260000	ASCAT	0.377983
0.99501	0.994885	0.0669547	sim_23	2750290000	ASCAT	1
0.990502	0.997615	0.215485	sim_230	2750290000	ASCAT	0.71236
0.942796	0.921213	0.360635	sim_231	2750290000	ASCAT	0.858288
0.995813	0.996357	0.0696972	sim_232	2750290000	ASCAT	0.843926
0.752225	0.776513	1.44245	sim_233	2748670000	ASCAT	0.254355
0.875965	0.849105	0.724762	sim_235	2747900000	ASCAT	0.549273
0.752375	0.840974	0.709014	sim_236	2750290000	ASCAT	0.780694
0.721116	0.699498	1.23617	sim_237	2750290000	ASCAT	0.549443
0.651126	0.788771	2.16294	sim_238	2750290000	ASCAT	0.614705
0.474696	0.511183	0.870272	sim_239	2747900000	ASCAT	0.210031
0.931909	0.887405	0.538646	sim_24	2750290000	ASCAT	0.690937
0.996586	0.996037	0.0397137	sim_240	2750280000	ASCAT	1
0.663327	0.92616	1.19143	sim_241	2747890000	ASCAT	0.781936
-2.32276e-05	-5.24244e-05	0.0500171	sim_242	2750290000	ASCAT	0.66
0.646624	0.987208	1.00621	sim_243	2750290000	ASCAT	0.94
0.685027	0.473391	1.27187	sim_244	2750290000	ASCAT	0.288315
0.559161	0.536862	0.891386	sim_245	2750260000	ASCAT	0.249986
0.690348	0.730628	0.600583	sim_246	2750290000	ASCAT	0.580086
0.960672	0.931196	0.68446	sim_247	2750280000	ASCAT	0.571544
0.752224	0.770852	0.53826	sim_248	2748470000	ASCAT	0.952804
0.467181	0.530549	0.840596	sim_249	2750250000	ASCAT	0.275604
0.712347	0.761704	1.35656	sim_25	2747890000	ASCAT	0.8289
0.374141	0.406427	0.255968	sim_250	2750260000	ASCAT	0.675066
0.917723	0.843438	0.813501	sim_251	2750290000	ASCAT	0.509227
0.452675	0.630814	0.497725	sim_252	2750290000	ASCAT	1
0.502251	0.518197	3.85104	sim_253	2747900000	ASCAT	0.948937
0.757315	0.933311	0.894566	sim_254	2750260000	ASCAT	0.898025
0.473339	0.482199	0.358391	sim_255	2750290000	ASCAT	0.304968
0.4766	0.418512	1.9077	sim_256	2750290000	ASCAT	0.260199
0.865168	0.822004	0.321452	sim_257	2750290000	ASCAT	0.453659
0.953497	0.952562	0.24302	sim_258	2750250000	ASCAT	0.748709
0.341426	0.669503	2.0006	sim_259	2750260000	ASCAT	0.649652
0.955368	0.912077	0.574531	sim_26	2749030000	ASCAT	0.507385
0.998279	0.99879	0.0629323	sim_260	2750260000	ASCAT	0.819398
0.762304	0.742847	1.88992	sim_261	2750290000	ASCAT	0.462346
0.892591	0.857796	2.05834	sim_262	2748470000	ASCAT	0.967254
0.855248	0.952951	0.147012	sim_263	2750290000	ASCAT	0.66114
0.874355	0.925423	0.405293	sim_264	2750290000	ASCAT	0.752983
0.539415	0.532529	2.05016	sim_266	2750290000	ASCAT	0.77652
0.986052	0.981763	0.289006	sim_267	2750290000	ASCAT	0.697544
0.955478	0.96296	0.226844	sim_268	2750280000	ASCAT	0.950863
0.996642	0.997701	0.0742237	sim_269	2747890000	ASCAT	0.916572
0.8706	0.783563	0.518409	sim_27	2750260000	ASCAT	0.541571
0.840422	0.728022	0.316304	sim_270	2748470000	ASCAT	0.486144
0.943368	0.868644	0.639976	sim_271	2750290000	ASCAT	0.74581
0.949567	0.972465	1.96113	sim_272	2750290000	ASCAT	1
0.932949	0.906652	0.210288	sim_273	2750290000	ASCAT	0.907184
0.913549	0.87401	0.408774	sim_274	2750290000	ASCAT	0.515997
0.542745	0.550515	1.42428	sim_275	2750280000	ASCAT	0.868753
0.927558	0.862914	0.417214	sim_276	2750290000	ASCAT	0.523134
0.565596	0.807763	1.0853	sim_277	2750290000	ASCAT	0.544336
0.592761	0.761067	0.465748	sim_278	2748810000	ASCAT	0.989865
0.94713	0.95313	0.242132	sim_279	2750240000	ASCAT	0.777255
0.78456	0.794424	0.148259	sim_28	2750290000	ASCAT	0.353897
0.513855	0.456473	4.44695	sim_280	2750280000	ASCAT	0.786041
0.924035	0.942242	0.198964	sim_281	2750290000	ASCAT	1
0.44738	0.628017	0.75812	sim_282	2750260000	ASCAT	0.300182
0.519565	0.535322	1.02817	sim_283	2749030000	ASCAT	0.280643
0.92681	0.933859	0.398674	sim_284	2750280000	ASCAT	0.854194
0.703763	0.665169	0.33295	sim_285	2750280000	ASCAT	0.557121
0.821261	0.767415	0.57754	sim_286	2750280000	ASCAT	0.924617
0.615765	0.788328	1.5254	sim_287	2750260000	ASCAT	0.298503
0.896407	0.867349	2.60475	sim_288	2750270000	ASCAT	0.952423
0.199328	0.314335	1.25887	sim_289	2750290000	ASCAT	0.505645
0.716704	0.717302	0.244156	sim_29	2750280000	ASCAT	0.303491
0.812849	0.757813	0.738849	sim_290	2747900000	ASCAT	0.463721
0.343116	0.352804	0.624835	sim_291	2750290000	ASCAT	0.46917
0.292537	0.462192	0.474417	sim_292	2750290000	ASCAT	0.789134
0.815492	0.915103	2.01531	sim_293	2750290000	ASCAT	0.520887
0.994587	0.997302	0.101945	sim_294	2750290000	ASCAT	0.873565
0.334385	0.640002	3.05793	sim_295	2750250000	ASCAT	0.677175
0.351392	0.348186	1.39539	sim_296	2750290000	ASCAT	0.468841
0.989972	0.989582	0.0648389	sim_297	2750290000	ASCAT	0.79
0.928236	0.910958	0.503613	sim_299	2750290000	ASCAT	0.5237
0.840639	0.821103	0.308769	sim_3	2750290000	ASCAT	0.969348
0.698444	0.628859	0.976607	sim_30	2750290000	ASCAT	0.16
0.650004	0.842728	1.06038	sim_300	2749410000	ASCAT	0.518671
0.99436	0.995845	0.263266	sim_301	2747020000	ASCAT	1
0.987145	0.988071	0.124647	sim_302	2750290000	ASCAT	0.918372
0.836294	0.815212	0.664201	sim_303	2750290000	ASCAT	0.462689
0.960219	0.951611	0.214421	sim_304	2750290000	ASCAT	0.621918
0.960011	0.963626	0.129891	sim_305	2750290000	ASCAT	0.710255
0.86094	0.87868	0.251018	sim_307	2750290000	ASCAT	0.608756
0.997136	0.998106	0.0736237	sim_308	2750290000	ASCAT	1
0.996098	0.998909	0.118809	sim_309	2750290000	ASCAT	0.958941
0.990557	0.994126	0.229292	sim_31	2750290000	ASCAT	0.896305
0.599911	0.469923	0.329561	sim_311	2747900000	ASCAT	0.333847
0.797228	0.905791	1.05734	sim_312	2749940000	ASCAT	0.793784
0.975353	0.991589	0.07966	sim_313	2750290000	ASCAT	0.944593
0.860344	0.776263	0.418972	sim_314	2748470000	ASCAT	0.746882
0.439711	0.378089	1.64424	sim_315	2750280000	ASCAT	0.11
0.998123	0.999337	0.142789	sim_316	2750290000	ASCAT	0.789506
0.827983	0.738642	0.447522	sim_318	2750290000	ASCAT	0.31714
0.298204	0.556659	0.990733	sim_319	2750290000	ASCAT	0.498444
0.995718	0.996983	0.0372569	sim_320	2750290000	ASCAT	0.86872
0.459041	0.469239	0.699724	sim_321	2750290000	ASCAT	0.240015
0.651003	0.645407	0.231342	sim_322	2750260000	ASCAT	0.927771
0.997494	0.996542	0.0447815	sim_323	2750290000	ASCAT	1
0.99366	0.995876	0.0782287	sim_324	2750280000	ASCAT	0.668238
0.997053	0.996702	0.0888133	sim_325	2750290000	ASCAT	1
0.536736	0.491501	1.28277	sim_326	2750290000	ASCAT	0.318056
0.351884	0.404564	0.70251	sim_327	2747900000	ASCAT	0.643557
0.798353	0.835755	0.292477	sim_328	2750270000	ASCAT	0.457494
0.977227	0.998224	0.150944	sim_329	2750290000	ASCAT	0.782708
0.996246	0.997824	0.0681634	sim_33	2736770000	ASCAT	1
0.815407	0.90354	0.677389	sim_330	2750260000	ASCAT	1
0.958983	0.94578	0.612737	sim_331	2750290000	ASCAT	0.917513
0.994823	0.998075	0.0849616	sim_332	2750290000	ASCAT	0.714814
0.409687	0.414313	0.648184	sim_333	2750290000	ASCAT	0.269886
0.214441	0.227828	0.90373	sim_334	2750290000	ASCAT	0.333647
0.707202	0.759342	1.12665	sim_336	2747900000	ASCAT	0.613136
0.502335	0.496463	1.96659	sim_337	2750290000	ASCAT	1
0.814501	0.819459	0.614274	sim_338	2750290000	ASCAT	0.989764
0.985775	0.990439	0.0697746	sim_339	2750290000	ASCAT	0.653577
0.99325	0.997939	0.141311	sim_34	2750290000	ASCAT	0.688112
0.996761	0.997795	0.0536227	sim_341	2750290000	ASCAT	0.836994
0.238865	0.237455	0.12962	sim_342	2750290000	ASCAT	0.717932
0.68134	0.926206	0.70672	sim_343	2750290000	ASCAT	0.969352
0.740825	0.67319	0.459171	sim_344	2750260000	ASCAT	0.660166
0.693363	0.640667	0.500663	sim_345	2750290000	ASCAT	1
0.986023	0.989851	0.173696	sim_347	2750290000	ASCAT	0.786751
0.998433	0.998636	0.054083	sim_348	2750290000	ASCAT	0.893937
0.974796	0.980561	0.221266	sim_349	2750290000	ASCAT	0.795595
0.315958	0.461274	1.30566	sim_35	2750290000	ASCAT	0.191492
0.889388	0.892807	2.15617	sim_350	2750290000	ASCAT	0.779156
0.663936	0.996432	0.974881	sim_351	2750290000	ASCAT	0.693103
0.912193	0.831797	0.267904	sim_352	2748730000	ASCAT	0.575592
0.664268	0.970259	2.09589	sim_353	2749400000	ASCAT	0.9434
0.995024	0.998226	0.142382	sim_354	2742890000	ASCAT	1
0.578747	0.91843	0.91552	sim_355	2750260000	ASCAT	1
0.257455	0.225332	1.69041	sim_356	2750280000	ASCAT	0.229286
0.626017	0.804446	0.467512	sim_357	2750290000	ASCAT	0.959103
0.88404	0.869783	0.601745	sim_358	2750290000	ASCAT	0.275733
0.930073	0.928696	0.146449	sim_359	2750290000	ASCAT	0.634337
0.544084	0.943308	1.18075	sim_36	2749920000	ASCAT	0.677426
0.902049	0.883571	0.80634	sim_360	2749000000	ASCAT	0.543064
0.869171	0.854171	0.733437	sim_361	2750250000	ASCAT	1
0.826933	0.866067	0.460163	sim_362	2750290000	ASCAT	0.92076
0.62205	0.595359	0.319279	sim_363	2750290000	ASCAT	0.225963
0.934763	0.941032	0.272493	sim_364	2749400000	ASCAT	1
0.942982	0.726654	0.45759	sim_365	2750290000	ASCAT	0.729391
0.87859	0.921456	0.70438	sim_366	2750290000	ASCAT	0.875355
0.954927	0.941749	0.312699	sim_367	2750290000	ASCAT	0.928555
0.898572	0.900589	0.413012	sim_368	2750250000	ASCAT	0.80412
0.728448	0.793986	0.117969	sim_369	2750290000	ASCAT	0.727682
0.604178	0.826462	1.30717	sim_37	2750260000	ASCAT	0.452925
0.651756	0.69971	0.244564	sim_370	2749030000	ASCAT	0.226751
0.869561	0.699913	0.25483	sim_371	2750290000	ASCAT	0.741284
0.979679	0.957762	0.143399	sim_372	2750290000	ASCAT	0.622521
0.808983	0.73856	0.377339	sim_373	2750290000	ASCAT	1
0.613328	0.810632	0.865802	sim_374	2750290000	ASCAT	0.3
0.993497	0.996437	0.125943	sim_375	2750290000	ASCAT	0.949156
0.933444	0.943177	0.141408	sim_376	2750290000	ASCAT	0.610147
0.950298	0.942469	0.690469	sim_377	2749940000	ASCAT	0.989991
0.560318	0.563049	0.831207	sim_378	2750260000	ASCAT	0.318313
0.976547	0.961654	0.535267	sim_379	2750280000	ASCAT	0.540685
0.922992	0.949283	0.344506	sim_38	2750260000	ASCAT	0.676738
0.450761	0.601486	1.18431	sim_380	2750290000	ASCAT	0.407444
0.607831	0.538701	0.348532	sim_381	2750260000	ASCAT	0.334534
0.991909	0.997974	0.224404	sim_382	2745650000	ASCAT	1
0.231577	0.331845	1.47138	sim_383	2747900000	ASCAT	0.206056
0.654872	0.797153	0.457453	sim_384	2750260000	ASCAT	1
0.989424	0.989346	0.0702624	sim_385	2750290000	ASCAT	0.714667
0.87509	0.845748	0.233286	sim_386	2750260000	ASCAT	0.742278
0.290941	0.517815	0.772847	sim_387	2750260000	ASCAT	0.274961
0.719732	0.666586	1.88371	sim_388	2750290000	ASCAT	0.265269
0.878764	0.858371	1.57255	sim_389	2750290000	ASCAT	0.28507
0.935819	0.945284	0.257035	sim_39	2750280000	ASCAT	0.482519
0.575476	0.635187	0.535631	sim_390	2748460000	ASCAT	0.865282
0.951416	0.949847	0.262714	sim_391	2748470000	ASCAT	0.718025
0.97888	0.98062	0.243951	sim_392	2748470000	ASCAT	0.722832
0.886331	0.758152	0.376223	sim_393	2750290000	ASCAT	0.681826
0.183004	0.371866	0.942305	sim_394	2750290000	ASCAT	0.41697
0.567115	0.467594	1.77441	sim_395	2750290000	ASCAT	0.35
0.939338	0.9075	0.317175	sim_396	2750290000	ASCAT	0.641664
0.864977	0.894152	0.480056	sim_397	2750290000	ASCAT	0.430104
0.790853	0.822401	0.721468	sim_399	2750290000	ASCAT	0.647736
0.802397	0.748455	0.330141	sim_4	2749120000	ASCAT	0.564132
0.682971	0.538384	0.605787	sim_40	2750290000	ASCAT	0.78692
0.383699	0.420017	0.407787	sim_400	2750260000	ASCAT	0.862223
0.966702	0.964073	0.278776	sim_401	2750290000	ASCAT	0.924917
0.679001	0.53463	0.878445	sim_402	2750260000	ASCAT	0.413632
0.606563	0.756456	0.93409	sim_403	2749030000	ASCAT	0.838234
0.975323	0.992466	0.0874821	sim_404	2750290000	ASCAT	0.826076
0.842652	0.900011	0.461338	sim_405	2748470000	ASCAT	1
0.995721	0.993428	0.112747	sim_406	2750290000	ASCAT	0.743091
0.537264	0.541274	0.309105	sim_407	2750260000	ASCAT	0.401019
0.401319	0.750377	0.682815	sim_408	2750290000	ASCAT	0.745554
0.994892	0.994276	0.0596463	sim_409	2750280000	ASCAT	1
0.755922	0.955851	0.332504	sim_41	2749000000	ASCAT	0.261594
0.259971	0.308608	0.570195	sim_410	2750290000	ASCAT	0.317948
0.789103	0.894488	1.39617	sim_411	2750290000	ASCAT	0.843489
0.981163	0.990249	0.167153	sim_412	2750280000	ASCAT	0.687048
0.884855	0.905561	0.627113	sim_413	2750290000	ASCAT	0.865852
0.74114	0.743943	0.346617	sim_415	2750290000	ASCAT	0.65493
0.919125	0.915328	0.509564	sim_416	2748470000	ASCAT	0.968936
0.680535	0.825397	0.946745	sim_417	2750290000	ASCAT	0.458258
0.810573	0.732348	0.315926	sim_418	2748470000	ASCAT	0.884539
0.728405	0.827566	0.384896	sim_419	2749920000	ASCAT	0.960266
0.375061	0.553847	0.434248	sim_42	2750290000	ASCAT	0.948935
0.888498	0.921373	0.268743	sim_420	2750290000	ASCAT	0.336706
0.845074	0.899187	0.708553	sim_421	2750290000	ASCAT	0.826121
0.925153	0.91262	0.258557	sim_422	2705910000	ASCAT	1
0.644993	0.681989	0.0369529	sim_423	2750290000	ASCAT	1
0.998546	0.998536	0.0436368	sim_424	2750290000	ASCAT	0.935687
0.315776	0.361817	0.601997	sim_425	2747900000	ASCAT	0.885385
0.916369	0.913253	0.789223	sim_426	2749770000	ASCAT	0.786417
0.538588	0.766363	0.4576	sim_427	2750260000	ASCAT	0.744315
0.119507	0.114517	0.191016	sim_428	2750290000	ASCAT	0.897864
0.798092	0.843569	0.976287	sim_429	2747890000	ASCAT	0.641856
0.96693	0.981944	0.057996	sim_43	2750290000	ASCAT	0.721808
0.284644	0.174038	0.510561	sim_430	2750290000	ASCAT	0.611356
0.787636	0.837258	0.707386	sim_431	2750290000	ASCAT	0.766062
0.206162	0.229012	1.39498	sim_432	2750290000	ASCAT	0.197344
0.827202	0.964476	0.319072	sim_433	2748450000	ASCAT	0.635996
0.864666	0.843551	0.474457	sim_434	2750290000	ASCAT	0.530374
0.762285	0.829204	0.991762	sim_435	2748470000	ASCAT	0.949189
0.889448	0.907884	0.13209	sim_436	2750290000	ASCAT	0.567143
0.0493433	0.0494994	0.305967	sim_437	2749030000	ASCAT	0.268902
0.395729	0.448179	0.882259	sim_438	2750290000	ASCAT	0.867552
0.970902	0.946517	0.624994	sim_439	2748900000	ASCAT	0.552052
0.994369	0.997022	0.058668	sim_44	2750260000	ASCAT	0.889603
0.988104	0.992261	0.202352	sim_440	2747900000	ASCAT	0.830902
0.602419	0.66924	1.2346	sim_441	2747900000	ASCAT	0.818271
0.905063	0.995075	0.345251	sim_442	2750290000	ASCAT	0.725204
0.834067	0.824541	0.284598	sim_444	2747890000	ASCAT	0.817106
0.927043	0.940126	0.353907	sim_445	2749920000	ASCAT	1
0.721236	0.697735	0.438248	sim_446	2749860000	ASCAT	0.422425
0.993115	0.995438	0.0504042	sim_447	2750290000	ASCAT	0.823593
0.375647	0.774569	2.0164	sim_448	2750260000	ASCAT	0.744323
0.277437	0.417089	0.678321	sim_449	2747890000	ASCAT	0.389723
0.927254	0.934325	0.164388	sim_45	2750290000	ASCAT	0.517582
0.996125	0.995658	0.106364	sim_450	2721510000	ASCAT	1
0.761659	0.680928	0.491989	sim_451	2750290000	ASCAT	0.385513
0.921624	0.911705	0.419162	sim_452	2750290000	ASCAT	0.633354
0.981048	0.992879	0.182652	sim_453	2750290000	ASCAT	0.629795
0.404435	0.846157	1.81589	sim_454	2750290000	ASCAT	0.265704
0.92478	0.969165	0.64641	sim_455	2747900000	ASCAT	1
0.97187	0.976297	0.258213	sim_457	2750290000	ASCAT	0.940748
0.974433	0.970624	0.26419	sim_458	2750290000	ASCAT	0.714633
0.377733	0.412657	0.454077	sim_459	2750290000	ASCAT	0.638617
0.99625	0.994163	0.035953	sim_46	2750290000	ASCAT	0.861985
0.748938	0.894435	0.83001	sim_460	2747900000	ASCAT	0.592665
0.936935	0.945972	0.246681	sim_461	2750290000	ASCAT	1
0.262211	0.661725	2.19495	sim_462	2750290000	ASCAT	0.84806
0.943542	0.969664	2.01326	sim_463	2750290000	ASCAT	0.912713
0.923922	0.931118	2.00654	sim_464	2750290000	ASCAT	0.89344
0.964504	0.965367	0.423115	sim_466	2747900000	ASCAT	0.781782
0.901966	0.86223	0.530566	sim_467	2750260000	ASCAT	0.887043
0.68614	0.699654	0.768512	sim_468	2749940000	ASCAT	0.427608
0.860215	0.85175	0.249904	sim_469	2750290000	ASCAT	0.863679
0.697052	0.604817	0.71103	sim_47	2749230000	ASCAT	0.363221
0.685049	0.680781	0.25601	sim_470	2750290000	ASCAT	0.673408
0.827892	0.896185	0.646735	sim_471	2750290000	ASCAT	0.540079
0.986949	0.991568	0.121877	sim_472	2750290000	ASCAT	1
0.902474	0.867924	0.82458	sim_473	2750290000	ASCAT	0.327754
-0.0191547	-0.0194954	0.27739	sim_474	2750250000	ASCAT	0.223459
0.327342	0.316748	0.231867	sim_475	2750260000	ASCAT	0.814209
0.970467	0.964423	0.394232	sim_476	2747900000	ASCAT	0.874726
0.808375	0.834413	1.65291	sim_477	2747900000	ASCAT	0.698743
0.754873	0.680238	0.506034	sim_478	2747900000	ASCAT	0.760167
0.91827	0.931153	1.97043	sim_479	2750290000	ASCAT	0.67
0.998376	0.998206	0.0434708	sim_48	2750290000	ASCAT	0.699813
0.658094	0.683609	1.12818	sim_480	2750290000	ASCAT	0.447337
0.878784	0.898113	0.515025	sim_481	2750280000	ASCAT	0.46334
0.712648	0.76543	0.984744	sim_482	2747900000	ASCAT	0.563594
0.9951	0.997696	0.0801973	sim_483	2750290000	ASCAT	0.892015
0.902027	0.864635	0.787098	sim_484	2750290000	ASCAT	0.389492
0.979477	0.989522	0.262605	sim_485	2750290000	ASCAT	0.989782
0.807843	0.853258	0.548602	sim_486	2750290000	ASCAT	0.416898
0.995583	0.998283	0.0749845	sim_487	2750290000	ASCAT	1
0.957317	0.934438	0.249359	sim_488	2750290000	ASCAT	0.609243
0.379572	0.388069	0.841913	sim_489	2749940000	ASCAT	0.23822
0.972076	0.971397	0.308943	sim_49	2750290000	ASCAT	0.767859
0.816744	0.852086	0.211887	sim_490	2750290000	ASCAT	0.322311
0.91683	0.917727	0.20733	sim_491	2750290000	ASCAT	0.633081
0.546615	0.715906	0.497282	sim_492	2747900000	ASCAT	0.77535
0.873624	0.869388	0.831388	sim_493	2750290000	ASCAT	0.516871
0.874798	0.853287	0.400351	sim_494	2750280000	ASCAT	0.69459
0.833818	0.791934	0.267044	sim_495	2750290000	ASCAT	0.405209
0.886048	0.770979	0.302268	sim_496	2750280000	ASCAT	0.52926
0.857306	0.783537	0.436382	sim_497	2750290000	ASCAT	0.41
0.884554	0.844546	0.766284	sim_498	2750290000	ASCAT	0.276281
0.981755	0.994992	0.145452	sim_499	2749920000	ASCAT	0.766823
0.665777	0.816731	0.688245	sim_5	2750290000	ASCAT	0.292948
0.00685099	0.0109667	0.245966	sim_50	2749110000	ASCAT	0.763648
0.795029	0.791171	0.111019	sim_500	2750290000	ASCAT	0.896056
0.974842	0.983308	0.225473	sim_51	2750290000	ASCAT	0.927638
0.46176	0.528584	1.22767	sim_52	2749520000	ASCAT	0.416136
0.628336	0.576744	0.542647	sim_53	2747900000	ASCAT	0.69
0.272985	0.606227	0.929653	sim_54	2750290000	ASCAT	0.504846
0.026081	0.0500557	1.92302	sim_55	2750260000	ASCAT	0.12
0.74647	0.821312	0.0957147	sim_56	2750290000	ASCAT	0.367913
0.411036	0.839511	1.16247	sim_57	2750250000	ASCAT	0.279907
0.454828	0.532239	0.962835	sim_58	2750280000	ASCAT	0.339236
0.995898	0.99522	0.0701742	sim_59	2750280000	ASCAT	0.919026
0.967139	0.956911	0.247853	sim_6	2750260000	ASCAT	0.801615
0.853762	0.875856	0.474992	sim_60	2750290000	ASCAT	0.91783
0.696061	0.805202	0.944932	sim_61	2750290000	ASCAT	0.627691
0.766558	0.78262	0.950362	sim_62	2749370000	ASCAT	0.329397
0.995362	0.989123	0.0419121	sim_63	2748560000	ASCAT	0.746104
0.987815	0.981963	0.287277	sim_64	2750290000	ASCAT	0.724349
0.976198	0.97193	0.275214	sim_65	2750290000	ASCAT	0.653693
0.972845	0.975751	0.22264	sim_66	2750290000	ASCAT	1
0.286385	0.980425	0.614351	sim_67	2750290000	ASCAT	1
0.64285	0.636232	2.15976	sim_69	2750290000	ASCAT	0.934751
0.982445	0.987623	0.217351	sim_7	2748470000	ASCAT	0.754866
0.936501	0.89882	0.912767	sim_70	2750290000	ASCAT	0.348559
0.112284	0.495291	2.07533	sim_71	2750260000	ASCAT	0.389035
0.977215	0.991069	0.10947	sim_72	2750290000	ASCAT	0.635623
0.936349	0.929778	0.13635	sim_73	2750290000	ASCAT	0.621706
0.757252	0.931185	1.05306	sim_74	2748990000	ASCAT	0.683652
0.816243	0.864488	1.08889	sim_75	2750290000	ASCAT	1
0.934452	0.933396	0.113014	sim_76	2750290000	ASCAT	0.694886
0.819908	0.73147	0.351406	sim_77	2750280000	ASCAT	0.417966
0.926304	0.929142	1.27748	sim_78	2750290000	ASCAT	0.345368
0.922572	0.920153	0.563734	sim_79	2748460000	ASCAT	0.808894
0.62299	0.621227	2.45634	sim_8	2750290000	ASCAT	0.802454
0.532627	0.562959	2.23881	sim_80	2750290000	ASCAT	0.437851
0.535848	0.760229	2.03425	sim_81	2750280000	ASCAT	0.640787
0.985856	0.992287	0.0502217	sim_82	2750290000	ASCAT	0.692884
0.642634	0.676696	0.289205	sim_83	2748470000	ASCAT	0.544421
0.718272	0.888249	0.935581	sim_84	2750250000	ASCAT	0.9694
0.970776	0.957733	0.336924	sim_85	2750260000	ASCAT	0.76663
0.997539	0.998118	0.0580408	sim_86	2749030000	ASCAT	0.938751
0.665929	0.828013	0.459429	sim_87	2750260000	ASCAT	0.826133
0.627218	0.929507	1.33005	sim_88	2748690000	ASCAT	0.967223
0.459648	0.459625	1.60408	sim_89	2750290000	ASCAT	0.791668
0.61267	0.686461	0.674825	sim_9	2749870000	ASCAT	0.784922
0.799154	0.91323	0.224817	sim_90	2749320000	ASCAT	0.402183
0.961233	0.977631	0.338541	sim_91	2750290000	ASCAT	0.444439
0.540924	0.676271	1.2148	sim_92	2750290000	ASCAT	0.590287
0.316966	0.235538	0.326769	sim_93	2750290000	ASCAT	0.617735
0.747608	0.830494	0.969982	sim_94	2748470000	ASCAT	0.58003
0.656797	0.616834	0.472374	sim_95	2749940000	ASCAT	0.509099
0.82886	0.915477	1.53766	sim_96	2750290000	ASCAT	0.488378
0.940191	0.938043	0.549556	sim_97	2750290000	ASCAT	0.76516
0.382097	0.445253	0.580756	sim_98	2749770000	ASCAT	0.397565
0.987629	0.987823	0.135593	sim_99	2750290000	ASCAT	0.700552
0.268608	0.939497	4.60638	sim_1	2742160000	sequenza	1
0.701611	0.859748	0.640501	sim_10	2746450000	sequenza	0.604324
0.0933798	0.833858	4.49355	sim_100	2746990000	sequenza	0.826476
0.271652	0.921335	6.68814	sim_101	2740450000	sequenza	0.878798
0.198775	0.979348	6.23799	sim_102	2746360000	sequenza	0.615282
0.816121	0.9044	2.51027	sim_103	2746350000	sequenza	0.98101
0.191806	0.875046	7.43513	sim_104	2745190000	sequenza	0.66477
0.165134	0.860044	5.54308	sim_105	2746270000	sequenza	0.860313
0.817605	0.792982	2.20665	sim_106	2747310000	sequenza	0.223827
0.386434	0.469467	2.84617	sim_107	2745660000	sequenza	0.796065
0.0235603	0.0517333	8.77335	sim_108	2744460000	sequenza	0.744101
0.423242	0.894771	2.28339	sim_109	2742610000	sequenza	0.889151
0.73241	0.992747	2.11182	sim_11	2746480000	sequenza	0.729402
0.612622	0.809691	2.23713	sim_110	2745910000	sequenza	1
0.911862	0.762411	0.683469	sim_111	2746390000	sequenza	0.582241
0.885551	0.831492	2.27057	sim_112	2746160000	sequenza	0.838275
0.596397	0.754653	2.0665	sim_113	2747060000	sequenza	0.612104
0.911931	0.959546	0.437461	sim_114	2742630000	sequenza	0.437141
0.958202	0.951006	0.394339	sim_115	2741840000	sequenza	0.86
0.906444	0.893969	2.14126	sim_116	2745740000	sequenza	0.564662
0.802517	0.756952	2.04513	sim_117	2747020000	sequenza	0.55466
0.583007	0.940105	2.43158	sim_118	2746070000	sequenza	0.54599
0.932701	0.885615	2.37801	sim_119	2746370000	sequenza	1
0.363698	-0.0954301	3.85718	sim_12	2744840000	sequenza	0.700761
0.182282	0.957913	3.3105	sim_120	2746630000	sequenza	0.917769
0.457629	0.913303	1.87882	sim_121	2742860000	sequenza	0.329325
0.44222	0.698295	2.87421	sim_122	2746160000	sequenza	1
0.870325	0.932645	0.671597	sim_123	2736090000	sequenza	1
0.595323	0.981435	1.46976	sim_124	2744940000	sequenza	0.625519
0.654513	0.861089	0.862463	sim_125	2744950000	sequenza	0.272669
0.561209	0.892713	1.79594	sim_127	2743960000	sequenza	0.786554
0.551135	0.872956	2.54692	sim_128	2743090000	sequenza	0.29
0.949278	0.984023	0.612573	sim_129	2742060000	sequenza	0.909245
0.75226	0.994094	1.71713	sim_13	2736550000	sequenza	0.14
0.983759	0.958151	2.01216	sim_130	2746790000	sequenza	0.989529
0.856077	0.839748	1.09214	sim_131	2746210000	sequenza	0.737661
0.980435	0.950114	0.347226	sim_132	2743290000	sequenza	0.733376
0.775934	0.916339	0.797234	sim_133	2742330000	sequenza	0.14
-0.0321827	-0.000991409	2.45637	sim_134	2746040000	sequenza	0.826404
0.278143	0.777332	2.80791	sim_135	2745670000	sequenza	0.682461
0.522759	0.915104	1.9569	sim_136	2742940000	sequenza	0.746479
0.372546	0.916238	2.94602	sim_137	2743660000	sequenza	0.651578
0.94662	0.984787	0.461556	sim_138	2741690000	sequenza	0.917389
0.765442	0.932832	0.688067	sim_139	2744470000	sequenza	0.793126
0.450531	0.888428	2.82847	sim_14	2746300000	sequenza	0.760885
0.619578	0.607981	3.13937	sim_140	2744770000	sequenza	0.844597
0.0808798	0.0796879	2.25217	sim_141	2746870000	sequenza	0.710192
0.86799	0.908394	0.559156	sim_142	2744380000	sequenza	0.393888
0.903075	0.879153	0.572757	sim_143	2745070000	sequenza	0.86
0.59465	0.994226	2.70545	sim_144	2738340000	sequenza	0.979862
0.887489	0.796665	2.21477	sim_146	2746230000	sequenza	0.936464
0.98979	0.990326	0.155505	sim_147	2745240000	sequenza	0.657429
0.944084	0.967061	0.707351	sim_148	2731650000	sequenza	1
0.31125	0.170807	4.08902	sim_149	2744990000	sequenza	0.245767
0.969394	0.956967	0.337392	sim_15	2743640000	sequenza	0.20388
0.236317	0.383289	0.99231	sim_150	2747310000	sequenza	0.937374
0.333607	0.649495	2.29101	sim_151	2747060000	sequenza	0.82536
0.239573	0.586819	2.61796	sim_152	2746890000	sequenza	1
0.452497	0.700438	3.99737	sim_153	2723950000	sequenza	0.492672
0.870641	0.835025	2.07291	sim_154	2745990000	sequenza	0.919295
0.965668	0.991757	0.591234	sim_155	2732850000	sequenza	0.266097
0.761117	0.930911	0.664277	sim_156	2745540000	sequenza	0.519862
0.196327	0.606972	3.02282	sim_157	2745940000	sequenza	0.791034
0.906277	0.860179	2.27846	sim_158	2689500000	sequenza	1
0.788657	0.931513	0.648947	sim_159	2743860000	sequenza	0.1
0.649163	0.956438	1.85567	sim_16	2740470000	sequenza	0.919395
0.823532	0.949191	0.705923	sim_160	2745760000	sequenza	0.339131
0.0791761	0.733527	7.27556	sim_161	2746840000	sequenza	0.828309
0.623646	0.40531	2.10834	sim_162	2745930000	sequenza	0.881212
0.626822	0.771599	2.12199	sim_163	2746520000	sequenza	0.372431
0.729299	0.877763	2.18464	sim_164	2747000000	sequenza	0.761675
0.667076	0.837036	0.762529	sim_165	2745730000	sequenza	0.948585
0.952571	0.953499	0.29274	sim_166	2742720000	sequenza	0.375182
0.839537	0.95006	0.728119	sim_167	2742770000	sequenza	1
0.659291	0.848813	0.863594	sim_168	2746090000	sequenza	0.473909
0.641573	0.824476	2.25979	sim_169	2746140000	sequenza	0.922356
0.933165	0.924408	2.30091	sim_17	2746700000	sequenza	0.739469
0.406228	0.720565	2.6139	sim_170	2747190000	sequenza	0.209723
0.93215	0.862575	2.53824	sim_171	2746330000	sequenza	0.971931
0.944031	0.906086	2.19193	sim_172	2746330000	sequenza	0.483497
0.96141	0.939072	0.254964	sim_173	2745890000	sequenza	0.491577
0.335858	0.968116	6.49687	sim_174	2722560000	sequenza	0.48032
0.553604	0.257056	3.31824	sim_175	2746420000	sequenza	0.90276
0.863799	0.998171	0.619587	sim_176	2744640000	sequenza	0.719924
0.659777	0.778873	0.821528	sim_177	2746510000	sequenza	0.979786
0.406578	0.91059	1.3528	sim_178	2745330000	sequenza	0.830074
0.0256546	0.0427585	1.13898	sim_179	2747110000	sequenza	0.231211
0.338139	0.635709	2.14593	sim_18	2746670000	sequenza	0.581804
0.940911	0.934439	2.22346	sim_180	2746600000	sequenza	0.849926
-0.0645813	-0.267403	5.23777	sim_181	2743140000	sequenza	0.887861
0.180693	0.416727	2.28719	sim_182	2746680000	sequenza	0.990056
0.31051	0.984719	5.04222	sim_183	2739230000	sequenza	0.435889
0.293002	0.857066	3.40251	sim_184	2746320000	sequenza	0.566711
0.352215	0.9134	2.25682	sim_185	2745890000	sequenza	0.683831
0.731295	0.843044	0.794674	sim_186	2744690000	sequenza	1
0.782838	0.943812	2.2633	sim_187	2746600000	sequenza	0.539731
0.397017	0.976318	1.88282	sim_188	2745600000	sequenza	0.799994
0.965174	0.945666	0.514545	sim_189	2746880000	sequenza	0.612407
0.926165	0.945064	0.622371	sim_19	2728920000	sequenza	0.287477
0.864238	0.888936	0.872153	sim_190	2739820000	sequenza	0.526432
0.672126	0.983632	0.909244	sim_191	2745450000	sequenza	0.89869
0.600287	0.683561	2.14008	sim_192	2746950000	sequenza	1
0.33948	0.813793	2.8368	sim_193	2746850000	sequenza	0.791998
0.574783	0.835231	0.762122	sim_194	2746740000	sequenza	1
0.566527	0.500574	2.96114	sim_195	2720390000	sequenza	0.449256
0.46525	0.429908	2.16717	sim_196	2746530000	sequenza	0.824689
0.136844	0.201904	3.10568	sim_197	2744090000	sequenza	0.627567
0.635585	0.980142	2.10912	sim_198	2747160000	sequenza	0.959985
0.0822591	0.688028	7.39707	sim_199	2746690000	sequenza	0.659281
0.202103	0.905485	0.934379	sim_2	2747150000	sequenza	0.754893
0.337832	0.960977	3.72783	sim_20	2742600000	sequenza	0.495866
0.573256	0.832457	2.31654	sim_200	2746080000	sequenza	1
0.805609	0.873621	0.541684	sim_202	2745000000	sequenza	0.835882
0.912479	0.972712	0.648115	sim_203	2740560000	sequenza	0.725093
0.721392	0.770293	2.35243	sim_204	2746210000	sequenza	0.862489
0.809006	0.851972	2.32746	sim_205	2746470000	sequenza	0.273873
0.570896	0.415423	4.03973	sim_206	2746150000	sequenza	0.496586
0.823465	0.85553	0.625599	sim_207	2744350000	sequenza	0.584756
0.794139	0.914976	0.791534	sim_208	2743490000	sequenza	0.767613
0.388692	0.97058	4.20834	sim_209	2740860000	sequenza	0.513774
0.889879	0.908639	0.385543	sim_21	2742990000	sequenza	0.859921
0.972614	0.964449	0.37507	sim_210	2739860000	sequenza	0.900874
0.604688	0.581567	2.56861	sim_211	2746330000	sequenza	0.599189
0.142315	0.801634	5.93155	sim_212	2746300000	sequenza	0.886321
0.401842	0.790945	2.37895	sim_213	2747210000	sequenza	0.427792
0.777989	0.960224	0.89797	sim_214	2727470000	sequenza	1
0.14677	0.977942	4.42292	sim_215	2746460000	sequenza	0.354162
0.115459	0.831984	6.8817	sim_216	2745750000	sequenza	0.927257
0.134529	0.901434	6.03974	sim_217	2742980000	sequenza	0.258944
0.925728	0.932321	0.4424	sim_218	2744030000	sequenza	0.87356
0.060808	0.0222679	3.48129	sim_219	2746450000	sequenza	0.353073
0.203333	0.892355	7.2891	sim_22	2744890000	sequenza	0.303329
0.545807	0.749474	2.13199	sim_220	2747090000	sequenza	0.848152
0.804291	0.958676	0.835921	sim_221	2734730000	sequenza	1
0.838669	0.938039	0.648281	sim_222	2744040000	sequenza	0.312302
0.607664	0.945402	1.15982	sim_223	2744400000	sequenza	0.583136
0.43901	0.791815	2.31861	sim_224	2746970000	sequenza	0.70125
0.94766	0.926546	0.386941	sim_225	2744680000	sequenza	0.624092
0.155878	0.885212	6.72285	sim_226	2746910000	sequenza	1
0.768066	0.962896	1.06985	sim_227	2743100000	sequenza	0.790102
0.767394	0.997214	0.948172	sim_228	2743150000	sequenza	0.624974
0.105848	0.573215	2.10417	sim_229	2747130000	sequenza	0.377983
0.928204	0.88269	2.33111	sim_23	2745700000	sequenza	1
0.948276	0.963999	0.489289	sim_230	2743150000	sequenza	0.71236
0.185706	0.941532	5.47504	sim_231	2744150000	sequenza	0.858288
0.807791	0.878451	2.47283	sim_232	2746510000	sequenza	0.843926
0.276785	0.987502	6.33279	sim_233	2738910000	sequenza	0.254355
0.471446	0.974117	2.44694	sim_235	2745180000	sequenza	0.549273
0.728708	0.839736	0.789153	sim_236	2744420000	sequenza	0.780694
0.961166	0.942871	0.364237	sim_237	2743890000	sequenza	0.549443
0.907407	0.993374	0.592554	sim_238	2741140000	sequenza	0.614705
0.925387	0.95648	2.18643	sim_239	2745220000	sequenza	0.210031
0.950507	0.909624	0.471521	sim_24	2739850000	sequenza	0.690937
0.136622	0.518315	4.9595	sim_240	2747060000	sequenza	1
0.947587	0.940798	0.355175	sim_241	2744880000	sequenza	0.781936
-6.54978e-05	-0.000768621	4.19698	sim_242	2747180000	sequenza	0.66
0.147115	0.792054	5.27434	sim_243	2744450000	sequenza	0.94
0.13449	0.904698	6.83436	sim_244	2745880000	sequenza	0.288315
0.220954	0.793366	3.11738	sim_245	2745920000	sequenza	0.249986
0.75058	0.86001	0.570007	sim_246	2746430000	sequenza	0.580086
0.966608	0.968611	0.482449	sim_247	2737680000	sequenza	0.571544
0.486437	0.895578	3.22746	sim_248	2743630000	sequenza	0.952804
0.894266	0.889111	0.413634	sim_249	2744210000	sequenza	0.275604
0.971694	0.989313	0.314437	sim_25	2742050000	sequenza	0.8289
0.327186	0.390443	1.98813	sim_250	2746890000	sequenza	0.675066
0.968564	0.950616	0.428611	sim_251	2741050000	sequenza	0.509227
0.457074	0.788134	2.15384	sim_252	2746930000	sequenza	1
0.655867	0.844703	2.44615	sim_253	2743630000	sequenza	0.948937
0.791157	0.995483	0.748935	sim_254	2744830000	sequenza	0.898025
0.260149	0.120737	4.0261	sim_255	2745160000	sequenza	0.304968
0.490261	0.431898	1.22172	sim_256	2746940000	sequenza	0.260199
0.902758	0.885429	2.24545	sim_257	2746360000	sequenza	0.453659
0.836329	0.855009	1.26463	sim_258	2746450000	sequenza	0.748709
0.0498811	0.982993	8.22329	sim_259	2746470000	sequenza	0.649652
0.350017	0.973047	3.7457	sim_26	2742620000	sequenza	0.507385
0.782639	0.85654	0.775858	sim_260	2743730000	sequenza	0.819398
0.641556	0.946942	1.25373	sim_261	2743200000	sequenza	0.462346
0.233748	0.827562	2.14315	sim_262	2746290000	sequenza	0.967254
0.509676	0.739823	0.464529	sim_263	2746890000	sequenza	0.66114
0.825907	0.912168	0.500218	sim_264	2745620000	sequenza	0.752983
0.0975041	0.896684	8.08434	sim_266	2746850000	sequenza	0.77652
0.967312	0.925423	0.443708	sim_267	2741170000	sequenza	0.697544
0.132572	0.85894	5.13389	sim_268	2743350000	sequenza	0.950863
0.812356	0.966055	0.619911	sim_269	2743150000	sequenza	0.916572
0.836913	0.843214	0.649557	sim_27	2745280000	sequenza	0.541571
0.935712	0.882229	2.12273	sim_270	2744040000	sequenza	0.486144
0.904016	0.907109	0.861278	sim_271	2738070000	sequenza	0.74581
0.323846	0.731207	2.65438	sim_272	2746250000	sequenza	1
0.526139	0.828187	0.844946	sim_273	2746360000	sequenza	0.907184
0.796375	0.927045	0.677379	sim_274	2744500000	sequenza	0.515997
0.595119	0.654115	2.44726	sim_275	2744730000	sequenza	0.868753
0.808971	0.946859	0.776452	sim_276	2745620000	sequenza	0.523134
0.774598	0.965713	0.613289	sim_277	2745160000	sequenza	0.544336
0.12073	0.967925	6.99824	sim_278	2746350000	sequenza	0.989865
0.733185	0.926182	2.55818	sim_279	2744710000	sequenza	0.777255
0.550003	0.706729	2.06654	sim_28	2746920000	sequenza	0.353897
0.146379	0.837976	8.21219	sim_280	2745900000	sequenza	0.786041
0.621236	0.975339	0.594894	sim_281	2746250000	sequenza	1
0.147867	0.880492	8.40389	sim_282	2746000000	sequenza	0.300182
0.519177	0.86666	1.43435	sim_283	2744820000	sequenza	0.280643
0.447162	0.937307	2.01686	sim_284	2738320000	sequenza	0.854194
0.835247	0.994945	2.09918	sim_285	2746830000	sequenza	0.557121
0.69951	0.857787	0.853069	sim_286	2744640000	sequenza	0.924617
0.746872	0.877443	0.763544	sim_287	2745930000	sequenza	0.298503
0.964551	0.955647	0.350711	sim_288	2739190000	sequenza	0.952423
0.159398	0.579011	5.06017	sim_289	2745090000	sequenza	0.505645
0.109416	0.776622	6.53308	sim_29	2746380000	sequenza	0.303491
0.685031	0.92021	1.14585	sim_290	2742960000	sequenza	0.463721
0.568013	0.824687	2.67373	sim_291	2746820000	sequenza	0.46917
-0.129797	-0.198265	3.08636	sim_292	2745570000	sequenza	0.789134
0.391378	0.775228	0.884974	sim_293	2746780000	sequenza	0.520887
0.803297	0.991764	0.715623	sim_294	2745280000	sequenza	0.873565
0.206097	0.951361	5.37704	sim_295	2743010000	sequenza	0.677175
0.848523	0.916583	0.740395	sim_296	2743280000	sequenza	0.468841
0.251489	0.822604	4.09508	sim_297	2746890000	sequenza	0.79
0.941079	0.913005	0.46505	sim_299	2744290000	sequenza	0.5237
0.180974	0.872584	6.06253	sim_3	2746740000	sequenza	0.969348
0.923552	0.970156	0.492199	sim_30	2739120000	sequenza	0.16
0.135944	0.969578	7.10728	sim_300	2743710000	sequenza	0.518671
0.964157	0.98782	0.666707	sim_301	2734930000	sequenza	1
0.880207	0.92809	2.42867	sim_302	2742950000	sequenza	0.918372
0.159525	0.986735	6.77733	sim_303	2743920000	sequenza	0.462689
0.939602	0.912206	2.38727	sim_304	2746220000	sequenza	0.621918
0.775738	0.892968	2.20039	sim_305	2746320000	sequenza	0.710255
0.126837	0.90591	7.99296	sim_307	2746950000	sequenza	0.608756
0.640939	0.898441	1.12464	sim_308	2744200000	sequenza	1
0.962533	0.945409	0.370099	sim_309	2742650000	sequenza	0.958941
0.890815	0.966309	0.840162	sim_31	2743280000	sequenza	0.896305
0.694388	0.806852	2.15725	sim_311	2746530000	sequenza	0.333847
0.171298	0.995232	7.86772	sim_312	2742730000	sequenza	0.793784
0.748701	0.783004	2.11031	sim_313	2745110000	sequenza	0.944593
0.91877	0.772607	2.30702	sim_314	2746730000	sequenza	0.746882
0.728967	0.913708	2.14492	sim_315	2746000000	sequenza	0.11
0.900094	0.983783	1.08209	sim_316	2741900000	sequenza	0.789506
0.54814	0.902769	1.14674	sim_318	2745410000	sequenza	0.31714
0.864925	0.916299	0.176189	sim_319	2746850000	sequenza	0.498444
0.77791	0.870326	2.0609	sim_320	2746590000	sequenza	0.86872
0.922069	0.868807	2.23076	sim_321	2746320000	sequenza	0.240015
0.465829	0.626064	2.08362	sim_322	2747160000	sequenza	0.927771
0.520487	0.798844	2.98988	sim_323	2746450000	sequenza	1
0.927853	0.96761	2.42128	sim_324	2746440000	sequenza	0.668238
0.816391	0.980771	0.798879	sim_325	2744090000	sequenza	1
0.796981	0.903814	0.783413	sim_326	2743190000	sequenza	0.318056
0.417713	0.409012	5.30733	sim_327	2743260000	sequenza	0.643557
0.792552	0.874163	2.16438	sim_328	2746800000	sequenza	0.457494
0.984298	0.997691	0.124394	sim_329	2744830000	sequenza	0.782708
0.480471	0.901494	1.37057	sim_33	2733760000	sequenza	1
0.711821	0.63796	3.12005	sim_330	2743400000	sequenza	1
0.889049	0.957747	1.00347	sim_331	2742800000	sequenza	0.917513
0.625947	0.907848	2.86141	sim_332	2746080000	sequenza	0.714814
0.90236	0.926064	2.33778	sim_333	2746100000	sequenza	0.269886
0.0889183	0.0353302	3.23097	sim_334	2745000000	sequenza	0.333647
0.882046	0.952471	0.678843	sim_336	2745440000	sequenza	0.613136
0.0261516	0.420703	17.775	sim_337	2745670000	sequenza	1
0.337274	0.87153	2.41962	sim_338	2746100000	sequenza	0.989764
0.452974	0.866062	2.5928	sim_339	2745250000	sequenza	0.653577
0.917309	0.973057	0.506966	sim_34	2743750000	sequenza	0.688112
0.859529	0.637995	2.20197	sim_341	2745580000	sequenza	0.836994
-0.0532638	-0.0592738	3.44463	sim_342	2743930000	sequenza	0.717932
0.875633	0.934368	2.42801	sim_343	2746470000	sequenza	0.969352
0.133393	0.881781	8.58216	sim_344	2746480000	sequenza	0.660166
0.668676	0.530121	2.31271	sim_345	2744880000	sequenza	1
0.207144	0.960696	4.79096	sim_347	2741180000	sequenza	0.786751
0.834103	0.7943	1.50605	sim_348	2746330000	sequenza	0.893937
0.274504	0.9247	3.35293	sim_349	2742570000	sequenza	0.795595
0.990792	0.996889	0.145518	sim_35	2743080000	sequenza	0.191492
0.168691	0.966144	6.79582	sim_350	2744050000	sequenza	0.779156
0.770205	0.957272	0.727885	sim_351	2745780000	sequenza	0.693103
0.613586	0.907027	2.75524	sim_352	2746030000	sequenza	0.575592
0.480611	0.908015	2.40212	sim_353	2744390000	sequenza	0.9434
0.293296	0.938288	4.62792	sim_354	2735090000	sequenza	1
0.690045	0.994373	0.57552	sim_355	2746160000	sequenza	1
0.808439	0.988179	0.625455	sim_356	2745780000	sequenza	0.229286
0.644282	0.897801	2.23989	sim_357	2745580000	sequenza	0.959103
0.198821	0.996707	5.13541	sim_358	2742230000	sequenza	0.275733
0.381672	0.860667	2.8145	sim_359	2746040000	sequenza	0.634337
0.600862	0.98325	0.832694	sim_36	2745800000	sequenza	0.677426
0.587486	0.931027	2.45012	sim_360	2730790000	sequenza	0.543064
0.365673	0.993472	3.25814	sim_361	2743600000	sequenza	1
0.908276	0.94694	2.42033	sim_362	2746380000	sequenza	0.92076
0.691547	0.745822	2.15579	sim_363	2746470000	sequenza	0.225963
0.946725	0.921006	2.32948	sim_364	2744460000	sequenza	1
0.979028	0.838877	2.58298	sim_365	2747060000	sequenza	0.729391
0.959461	0.933961	0.371257	sim_366	2742310000	sequenza	0.875355
0.32056	0.995006	3.03237	sim_367	2744780000	sequenza	0.928555
0.58292	0.870005	1.03142	sim_368	2744250000	sequenza	0.80412
0.359168	0.96907	2.14563	sim_369	2747080000	sequenza	0.727682
0.934155	0.981153	0.406355	sim_37	2744090000	sequenza	0.452925
0.0703197	0.184675	4.45221	sim_370	2746460000	sequenza	0.226751
0.893079	0.700604	0.634291	sim_371	2746870000	sequenza	0.741284
0.807827	0.63623	1.10722	sim_372	2746330000	sequenza	0.622521
0.711042	0.740468	1.1243	sim_373	2746460000	sequenza	1
0.924227	0.929509	0.410375	sim_374	2742600000	sequenza	0.3
0.828615	0.934492	0.725097	sim_375	2738720000	sequenza	0.949156
0.480764	0.900472	2.52764	sim_376	2746690000	sequenza	0.610147
0.566128	0.984779	2.91119	sim_377	2737480000	sequenza	0.989991
0.959183	0.92999	2.34152	sim_378	2745210000	sequenza	0.318313
0.467954	0.965165	3.84052	sim_379	2740910000	sequenza	0.540685
0.777793	0.928232	0.648605	sim_38	2744880000	sequenza	0.676738
0.358886	0.979657	2.67488	sim_380	2744200000	sequenza	0.407444
0.721984	0.762169	2.17511	sim_381	2746000000	sequenza	0.334534
0.802312	0.975172	1.29703	sim_382	2735750000	sequenza	1
0.598769	0.698496	3.99104	sim_383	2742990000	sequenza	0.206056
0.448741	0.908345	2.75975	sim_384	2746660000	sequenza	1
0.711351	0.826652	2.30719	sim_385	2746850000	sequenza	0.714667
0.819944	0.828272	2.06928	sim_386	2746510000	sequenza	0.742278
0.768053	0.986375	2.18927	sim_387	2747050000	sequenza	0.274961
0.906864	0.958242	0.717311	sim_388	2742260000	sequenza	0.265269
0.840003	0.987951	1.37132	sim_389	2735800000	sequenza	0.28507
0.867049	0.909199	0.415137	sim_39	2746180000	sequenza	0.482519
0.663097	0.416268	3.78893	sim_390	2743520000	sequenza	0.865282
0.184116	0.845744	8.46659	sim_391	2741040000	sequenza	0.718025
0.926199	0.91375	0.480364	sim_392	2745020000	sequenza	0.722832
0.913236	0.897309	0.325744	sim_393	2746360000	sequenza	0.681826
0.305625	0.43913	0.731681	sim_394	2746890000	sequenza	0.41697
0.874181	0.918065	0.754178	sim_395	2738940000	sequenza	0.35
0.832786	0.802315	0.56822	sim_396	2744550000	sequenza	0.641664
0.765669	0.896192	0.77846	sim_397	2745300000	sequenza	0.430104
0.84686	0.848802	0.650686	sim_399	2742290000	sequenza	0.647736
0.140848	0.985505	7.47462	sim_4	2746200000	sequenza	0.564132
0.601975	0.638257	0.740277	sim_40	2746160000	sequenza	0.78692
0.535752	0.445737	1.93688	sim_400	2746900000	sequenza	0.862223
0.923622	0.909766	0.447205	sim_401	2744290000	sequenza	0.924917
0.656297	0.766402	0.874123	sim_402	2746520000	sequenza	0.413632
0.735656	0.826659	0.604222	sim_403	2746370000	sequenza	0.838234
0.716837	0.608323	2.19091	sim_404	2746580000	sequenza	0.826076
0.294017	0.970734	5.16414	sim_405	2745710000	sequenza	1
0.93543	0.930463	0.472819	sim_406	2743320000	sequenza	0.743091
0.466243	0.80013	2.28406	sim_407	2746410000	sequenza	0.401019
0.758045	0.99276	2.14959	sim_408	2747070000	sequenza	0.745554
0.217728	0.972667	5.56746	sim_409	2746900000	sequenza	1
0.214872	0.965681	4.31335	sim_41	2745910000	sequenza	0.261594
0.30251	0.902196	3.46073	sim_410	2746820000	sequenza	0.317948
0.829592	0.975944	1.04627	sim_411	2738650000	sequenza	0.843489
0.853097	0.857563	0.506704	sim_412	2744260000	sequenza	0.687048
0.937729	0.942058	0.465277	sim_413	2743750000	sequenza	0.865852
0.79966	0.616607	2.16776	sim_415	2744710000	sequenza	0.65493
0.286457	0.935707	3.84118	sim_416	2744470000	sequenza	0.968936
0.596626	0.947706	1.52497	sim_417	2742580000	sequenza	0.458258
0.812211	0.772633	2.1738	sim_418	2746970000	sequenza	0.884539
0.365635	0.760128	2.93945	sim_419	2745830000	sequenza	0.960266
0.418029	0.923111	2.18247	sim_42	2746810000	sequenza	0.948935
0.631087	0.873258	2.44124	sim_420	2746690000	sequenza	0.336706
0.981248	0.97622	0.226645	sim_421	2744970000	sequenza	0.826121
0.248427	0.880324	5.58778	sim_422	2702160000	sequenza	1
0.0288553	0.0291167	3.46118	sim_423	2746010000	sequenza	1
0.876097	0.867993	0.442699	sim_424	2743950000	sequenza	0.935687
0.41621	0.191702	3.91345	sim_425	2745430000	sequenza	0.885385
0.610209	0.899684	2.19953	sim_426	2732100000	sequenza	0.786417
0.432494	0.868145	2.29611	sim_427	2746610000	sequenza	0.744315
0.0676618	0.0399988	2.13896	sim_428	2746840000	sequenza	0.897864
0.894773	0.944942	0.695795	sim_429	2742540000	sequenza	0.641856
0.589632	0.840356	2.15735	sim_43	2746870000	sequenza	0.721808
0.0609495	0.146311	15.4437	sim_430	2744690000	sequenza	0.611356
0.24052	0.9752	4.00134	sim_431	2745630000	sequenza	0.766062
0.841294	0.957031	0.542423	sim_432	2745150000	sequenza	0.197344
0.980237	0.954928	2.17847	sim_433	2746500000	sequenza	0.635996
0.937433	0.972916	0.316443	sim_434	2744230000	sequenza	0.530374
0.444208	0.960354	2.43146	sim_435	2742620000	sequenza	0.949189
0.718844	0.782875	2.06231	sim_436	2746980000	sequenza	0.567143
0.0300708	0.176931	3.37446	sim_437	2746820000	sequenza	0.268902
0.666253	0.793613	2.11356	sim_438	2744980000	sequenza	0.867552
0.540492	0.979719	2.9464	sim_439	2741020000	sequenza	0.552052
0.809345	0.615013	2.263	sim_44	2745810000	sequenza	0.889603
0.964437	0.951003	0.350101	sim_440	2742830000	sequenza	0.830902
0.60086	0.848416	1.26749	sim_441	2741210000	sequenza	0.818271
0.599743	0.809814	0.916103	sim_442	2745070000	sequenza	0.725204
0.863078	0.820259	2.04879	sim_444	2745820000	sequenza	0.817106
0.373396	0.85359	1.92997	sim_445	2745280000	sequenza	1
0.851862	0.924394	2.14918	sim_446	2745080000	sequenza	0.422425
0.877625	0.862589	2.01892	sim_447	2746840000	sequenza	0.823593
0.0641721	0.608004	5.41147	sim_448	2745470000	sequenza	0.744323
0.00422762	0.149267	7.11304	sim_449	2743920000	sequenza	0.389723
0.761663	0.609753	2.15053	sim_45	2745250000	sequenza	0.517582
0.21606	0.938191	5.27822	sim_450	2720740000	sequenza	1
0.789716	0.804629	0.51219	sim_451	2746280000	sequenza	0.385513
0.511976	0.902526	1.72989	sim_452	2742800000	sequenza	0.633354
0.881928	0.882498	0.499834	sim_453	2745010000	sequenza	0.629795
0.995248	0.99539	0.141165	sim_454	2741080000	sequenza	0.265704
0.270232	0.976528	4.97224	sim_455	2725950000	sequenza	1
0.92001	0.920931	0.45432	sim_457	2744500000	sequenza	0.940748
0.848395	0.893981	0.707613	sim_458	2742780000	sequenza	0.714633
0.380262	0.558115	2.26188	sim_459	2747020000	sequenza	0.638617
0.89965	0.917398	2.13571	sim_46	2746110000	sequenza	0.861985
0.840426	0.860144	0.562952	sim_460	2743190000	sequenza	0.592665
0.773515	0.987973	0.533672	sim_461	2746180000	sequenza	1
0.4028	0.556326	1.00105	sim_462	2747190000	sequenza	0.84806
0.52948	0.808021	0.676934	sim_463	2745920000	sequenza	0.912713
0.480302	0.637844	0.73626	sim_464	2746460000	sequenza	0.89344
0.788946	0.970451	1.17655	sim_466	2737270000	sequenza	0.781782
0.576592	0.903159	1.53802	sim_467	2745010000	sequenza	0.887043
0.835071	0.849242	2.29313	sim_468	2745300000	sequenza	0.427608
0.550323	0.848869	2.38031	sim_469	2746570000	sequenza	0.863679
0.173522	0.830332	5.09074	sim_47	2746090000	sequenza	0.363221
0.564152	0.761568	2.12311	sim_470	2747190000	sequenza	0.673408
0.860236	0.975127	0.608812	sim_471	2744410000	sequenza	0.540079
0.860307	0.948489	2.42178	sim_472	2744990000	sequenza	1
0.970577	0.945359	0.400929	sim_473	2738930000	sequenza	0.327754
0.331897	0.431729	1.98573	sim_474	2747260000	sequenza	0.223459
0.0239092	0.313461	6.65396	sim_475	2746990000	sequenza	0.814209
0.800404	0.958958	1.14529	sim_476	2740130000	sequenza	0.874726
0.878262	0.965051	1.24902	sim_477	2739050000	sequenza	0.698743
0.410632	0.778304	3.38052	sim_478	2746310000	sequenza	0.760167
0.60948	0.879045	1.15773	sim_479	2746130000	sequenza	0.67
0.888021	0.964377	2.54941	sim_48	2746290000	sequenza	0.699813
0.230916	0.929271	5.18651	sim_480	2745150000	sequenza	0.447337
0.60918	0.785753	1.27813	sim_481	2745560000	sequenza	0.46334
0.78729	0.8914	0.822415	sim_482	2743900000	sequenza	0.563594
0.813645	0.937188	0.605924	sim_483	2744770000	sequenza	0.892015
0.198761	0.968864	4.93583	sim_484	2743970000	sequenza	0.389492
0.844824	0.948052	0.771623	sim_485	2743210000	sequenza	0.989782
0.855266	0.986511	0.543808	sim_486	2744190000	sequenza	0.416898
0.6634	0.767936	0.843166	sim_487	2745780000	sequenza	1
0.902404	0.934879	2.54722	sim_488	2744420000	sequenza	0.609243
0.8584	0.889369	2.51036	sim_489	2743160000	sequenza	0.23822
0.900871	0.995808	0.609406	sim_49	2744040000	sequenza	0.767859
0.319326	0.656491	1.7296	sim_490	2746380000	sequenza	0.322311
0.0745113	0.534512	7.8737	sim_491	2746350000	sequenza	0.633081
0.481286	0.832693	2.41395	sim_492	2744420000	sequenza	0.77535
0.814749	0.970197	1.1627	sim_493	2738600000	sequenza	0.516871
0.883887	0.901461	0.395029	sim_494	2743740000	sequenza	0.69459
0.897133	0.833102	2.06903	sim_495	2746450000	sequenza	0.405209
0.9347	0.866068	2.23054	sim_496	2746120000	sequenza	0.52926
0.836139	0.869901	0.506094	sim_497	2744930000	sequenza	0.41
0.904365	0.86141	0.519491	sim_498	2741550000	sequenza	0.276281
0.884175	0.931769	2.48932	sim_499	2745660000	sequenza	0.766823
0.606126	0.832404	1.16955	sim_5	2745580000	sequenza	0.292948
-0.000345261	-0.000136586	2.07096	sim_50	2746730000	sequenza	0.763648
-0.235005	-0.251044	3.66875	sim_500	2746120000	sequenza	0.896056
0.190312	0.864777	5.47776	sim_51	2744120000	sequenza	0.927638
0.781025	0.931937	0.639691	sim_52	2745980000	sequenza	0.416136
0.855695	0.799715	2.14423	sim_53	2744450000	sequenza	0.69
0.47518	0.840714	0.440719	sim_54	2746400000	sequenza	0.504846
0.826776	0.753109	2.13427	sim_55	2746650000	sequenza	0.12
0.0587966	0.389512	4.85851	sim_56	2747120000	sequenza	0.367913
0.948547	0.954357	0.270827	sim_57	2744840000	sequenza	0.279907
0.182147	0.938309	5.1422	sim_58	2741240000	sequenza	0.339236
0.580679	0.890514	3.12599	sim_59	2743040000	sequenza	0.919026
0.668297	0.901819	3.16162	sim_6	2745250000	sequenza	0.801615
0.856796	0.88271	2.46874	sim_60	2745830000	sequenza	0.91783
0.182325	0.99753	5.87643	sim_61	2744830000	sequenza	0.627691
0.849311	0.911364	0.839361	sim_62	2740260000	sequenza	0.329397
0.705626	0.688002	2.22123	sim_63	2746960000	sequenza	0.746104
0.33907	0.957476	5.24978	sim_64	2737000000	sequenza	0.724349
0.847021	0.976061	0.74476	sim_65	2743650000	sequenza	0.653693
0.612456	0.992162	1.20168	sim_66	2744510000	sequenza	1
0.171323	0.62631	2.91711	sim_67	2746850000	sequenza	1
0.507461	0.502067	2.14455	sim_69	2741320000	sequenza	0.934751
0.495548	0.900562	1.8498	sim_7	2742210000	sequenza	0.754866
0.310523	0.962266	5.15756	sim_70	2739780000	sequenza	0.348559
0.595758	0.975047	0.804498	sim_71	2746920000	sequenza	0.389035
0.831842	0.888974	2.19331	sim_72	2746430000	sequenza	0.635623
0.523741	0.34038	2.55296	sim_73	2745730000	sequenza	0.621706
0.207736	0.931334	5.08096	sim_74	2744100000	sequenza	0.683652
0.3934	0.987949	3.59469	sim_75	2736980000	sequenza	1
0.771683	0.783116	1.93878	sim_76	2746640000	sequenza	0.694886
0.69253	0.836036	2.51059	sim_77	2746340000	sequenza	0.417966
0.411158	0.978079	4.72176	sim_78	2731190000	sequenza	0.345368
0.867041	0.900211	0.732979	sim_79	2741010000	sequenza	0.808894
0.239599	0.610959	6.93222	sim_8	2741320000	sequenza	0.802454
0.481023	0.548102	2.04706	sim_80	2745590000	sequenza	0.437851
0.52101	0.70688	2.24681	sim_81	2746610000	sequenza	0.640787
0.0863962	0.396086	5.67787	sim_82	2747080000	sequenza	0.692884
0.808366	0.771626	2.01201	sim_83	2746700000	sequenza	0.544421
0.866037	0.994281	0.555009	sim_84	2745740000	sequenza	0.9694
0.908008	0.969795	0.606994	sim_85	2744300000	sequenza	0.76663
0.195421	0.918971	3.95933	sim_86	2745590000	sequenza	0.938751
0.810365	0.994631	2.15115	sim_87	2746800000	sequenza	0.826133
0.569998	0.969568	1.52894	sim_88	2743660000	sequenza	0.967223
0.755429	0.698667	3.36847	sim_89	2740870000	sequenza	0.791668
0.789161	0.814477	1.06648	sim_9	2744580000	sequenza	0.784922
0.418927	0.750699	2.55745	sim_90	2746370000	sequenza	0.402183
0.286045	0.936876	3.69199	sim_91	2744810000	sequenza	0.444439
0.973882	0.971984	0.218411	sim_92	2743750000	sequenza	0.590287
0.169868	0.314206	1.74302	sim_93	2747340000	sequenza	0.617735
0.208007	0.997446	6.27592	sim_94	2744430000	sequenza	0.58003
0.416533	0.669486	2.10434	sim_95	2744940000	sequenza	0.509099
0.991308	0.993953	0.320941	sim_96	2736040000	sequenza	0.488378
0.944933	0.938966	0.51078	sim_97	2738140000	sequenza	0.76516
0.704301	0.852095	2.19884	sim_98	2746570000	sequenza	0.397565
0.757812	0.897715	0.674143	sim_99	2745920000	sequenza	0.700552
0.948822	0.938007	1.88286	sim_1	2716900000	facets	1
0.506684	0.588456	1.20088	sim_10	2684270000	facets	0.604324
0.601418	0.249103	1.74625	sim_100	2673930000	facets	0.826476
0.727968	0.449741	1.39204	sim_101	2722970000	facets	0.878798
0.942693	0.930998	0.962304	sim_102	2650210000	facets	0.615282
0.912145	0.832703	1.00328	sim_103	2684210000	facets	0.98101
0.861903	0.900598	1.80346	sim_104	2674110000	facets	0.66477
0.771373	0.789662	2.18145	sim_105	2670700000	facets	0.860313
0.55243	0.729777	2.15571	sim_106	2685480000	facets	0.223827
0.599406	0.569121	0.761658	sim_107	2681040000	facets	0.796065
0.334838	0.259444	0.564186	sim_108	2685620000	facets	0.744101
0.837254	0.845326	1.39063	sim_109	2676040000	facets	0.889151
0.779444	0.707234	0.631359	sim_11	2720370000	facets	0.729402
0.842538	0.787025	1.07413	sim_110	2695450000	facets	1
0.596834	0.423262	2.85862	sim_111	2660690000	facets	0.582241
0.895139	0.838483	1.11557	sim_112	2671140000	facets	0.838275
0.789798	0.576999	0.662536	sim_113	2697710000	facets	0.612104
0.705647	0.691851	1.48271	sim_114	2715020000	facets	0.437141
0.785818	0.708057	1.83735	sim_115	2668220000	facets	0.86
0.801515	0.776645	0.842847	sim_116	2626800000	facets	0.564662
0.863276	0.73815	0.562861	sim_117	2667430000	facets	0.55466
0.713134	0.594167	0.869972	sim_118	2718270000	facets	0.54599
0.329242	0.0670478	2.73021	sim_119	2656610000	facets	1
0.6972	0.53798	0.818039	sim_12	2717950000	facets	0.700761
0.894038	0.789371	1.09374	sim_120	2678740000	facets	0.917769
0.873953	0.906125	1.18929	sim_121	2672000000	facets	0.329325
0.900495	0.702464	0.634227	sim_122	2721770000	facets	1
0.938046	0.979046	1.90716	sim_123	2720970000	facets	1
0.907902	0.937662	1.12917	sim_124	2649900000	facets	0.625519
0.318317	0.193782	1.40844	sim_125	2734820000	facets	0.272669
0.409729	0.4096	1.68109	sim_126	2710550000	facets	0.683799
0.966659	0.95433	2.08007	sim_127	2718360000	facets	0.786554
0.521337	0.352674	3.66411	sim_128	2705670000	facets	0.29
0.919664	0.911273	2.49585	sim_129	2732660000	facets	0.909245
0.90253	0.912985	2.44852	sim_13	2684020000	facets	0.14
0.689919	0.7467	1.38682	sim_130	2698730000	facets	0.989529
0.951682	0.969178	0.98664	sim_131	2671510000	facets	0.737661
0.934435	0.863128	0.9167	sim_132	2738440000	facets	0.733376
0.682503	0.636126	2.37887	sim_133	2623350000	facets	0.14
0.0878664	0.0680794	2.75698	sim_134	2698240000	facets	0.826404
0.743483	0.557151	1.98448	sim_135	2695280000	facets	0.682461
0.728743	0.761733	1.56445	sim_136	2733060000	facets	0.746479
0.913679	0.924422	0.901751	sim_137	2721940000	facets	0.651578
0.82298	0.847826	1.01733	sim_138	2723790000	facets	0.917389
0.818972	0.757469	0.857881	sim_139	2634120000	facets	0.793126
0.910497	0.849453	5.12608	sim_14	2695150000	facets	0.760885
0.906319	0.822905	1.75652	sim_140	2711380000	facets	0.844597
0.148301	0.0779043	0.509689	sim_141	2668680000	facets	0.710192
0.95103	0.965312	1.36724	sim_142	2698620000	facets	0.393888
0.829547	0.829386	1.5309	sim_143	2708850000	facets	0.86
0.899931	0.909003	2.01451	sim_144	2727390000	facets	0.979862
0.595733	0.502796	1.21924	sim_145	2746130000	facets	0.913307
0.885668	0.400722	1.01626	sim_146	2696050000	facets	0.936464
0.800428	0.771899	1.31746	sim_147	2655980000	facets	0.657429
0.891869	0.898093	1.94204	sim_148	2704660000	facets	1
0.642417	0.51039	0.983671	sim_149	2641890000	facets	0.245767
0.966944	0.951687	2.00689	sim_15	2736440000	facets	0.20388
0.155079	0.319459	2.11421	sim_150	2642740000	facets	0.937374
0.67191	0.528799	1.33312	sim_151	2654020000	facets	0.82536
0.398126	0.324388	3.73862	sim_152	2667530000	facets	1
0.713848	0.727822	1.89301	sim_153	2741960000	facets	0.492672
0.58943	0.480449	1.84181	sim_154	2710560000	facets	0.919295
0.911631	0.899337	1.64636	sim_155	2715040000	facets	0.266097
0.657388	0.526127	3.63463	sim_156	2670580000	facets	0.519862
0.330083	0.536212	1.37041	sim_157	2673760000	facets	0.791034
0.902884	0.817356	1.17384	sim_158	2669490000	facets	1
0.932572	0.942867	1.53762	sim_159	2727000000	facets	0.1
0.714887	0.509824	1.20395	sim_16	2709670000	facets	0.919395
0.68625	0.321316	1.47238	sim_160	2708510000	facets	0.339131
0.706346	0.572021	3.7189	sim_161	2697210000	facets	0.828309
0.501449	0.383174	0.75231	sim_162	2644780000	facets	0.881212
0.287544	0.0869276	3.35765	sim_163	2718880000	facets	0.372431
0.874659	0.89141	1.00877	sim_164	2728510000	facets	0.761675
0.647729	0.675514	1.34085	sim_165	2724260000	facets	0.948585
0.928505	0.94956	1.18349	sim_166	2713700000	facets	0.375182
0.717247	0.738266	1.4386	sim_167	2722770000	facets	1
0.80135	0.865188	0.941724	sim_168	2707560000	facets	0.473909
0.769528	0.728426	2.84714	sim_169	2711610000	facets	0.922356
0.74696	0.769288	1.30577	sim_17	2716550000	facets	0.739469
0.815542	0.716735	3.051	sim_170	2670060000	facets	0.209723
0.564549	0.349809	3.57514	sim_171	2665480000	facets	0.971931
0.722635	0.636488	2.02418	sim_172	2678930000	facets	0.483497
0.955288	0.95319	1.23778	sim_173	2672100000	facets	0.491577
0.878226	0.859733	1.07625	sim_174	2710900000	facets	0.48032
0.730569	0.303587	0.982762	sim_175	2731320000	facets	0.90276
0.885376	0.906372	0.991063	sim_176	2719460000	facets	0.719924
0.909751	0.835805	1.81225	sim_177	2642160000	facets	0.979786
0.800974	0.876841	2.73084	sim_178	2710190000	facets	0.830074
0.020351	0.0434571	2.11906	sim_179	2644350000	facets	0.231211
0.631511	0.470993	0.350716	sim_18	2656050000	facets	0.581804
0.37691	0.0268052	2.61662	sim_180	2709520000	facets	0.849926
0.585467	0.526575	0.669097	sim_181	2649250000	facets	0.887861
0.447951	0.358799	1.05706	sim_182	2675030000	facets	0.990056
0.941817	0.95675	1.90981	sim_183	2699430000	facets	0.435889
0.766893	0.774261	0.80076	sim_184	2670180000	facets	0.566711
0.604833	0.503779	2.69598	sim_185	2686440000	facets	0.683831
0.403603	0.113656	1.69043	sim_186	2713470000	facets	1
0.911495	0.909854	1.49245	sim_187	2666610000	facets	0.539731
0.584239	0.308858	3.53182	sim_188	2679730000	facets	0.799994
0.930159	0.619227	0.959878	sim_189	2721600000	facets	0.612407
0.887915	0.907117	5.21575	sim_19	2736100000	facets	0.287477
0.72783	0.661033	1.50055	sim_190	2736770000	facets	0.526432
0.787226	0.889126	1.78083	sim_191	2712930000	facets	0.89869
0.740042	0.718327	0.624961	sim_192	2709700000	facets	1
0.551052	0.436389	2.89496	sim_193	2668890000	facets	0.791998
0.813152	0.588495	1.75899	sim_194	2669810000	facets	1
0.649744	0.525653	2.93276	sim_195	2668950000	facets	0.449256
0.566297	0.315991	2.95938	sim_196	2707690000	facets	0.824689
0.379883	0.373446	1.75957	sim_197	2734930000	facets	0.627567
0.572509	0.452009	0.698327	sim_198	2711810000	facets	0.959985
0.620657	0.518401	0.801425	sim_199	2659030000	facets	0.659281
0.313735	0.319332	1.91371	sim_2	2720280000	facets	0.754893
0.892664	0.861711	2.5531	sim_20	2702310000	facets	0.495866
0.866212	0.766287	1.56215	sim_200	2663780000	facets	1
0.633073	0.655427	1.31355	sim_201	2725170000	facets	0.729961
0.150057	-0.17511	1.44709	sim_202	2730350000	facets	0.835882
0.901599	0.824085	2.42693	sim_203	2680570000	facets	0.725093
0.794632	0.680203	0.867678	sim_204	2659910000	facets	0.862489
0.938366	0.823707	0.748409	sim_205	2653300000	facets	0.273873
0.618223	0.525937	0.660068	sim_206	2644650000	facets	0.496586
0.522189	0.176142	2.41437	sim_207	2728350000	facets	0.584756
0.731851	0.758447	1.38396	sim_208	2695170000	facets	0.767613
0.844599	0.880666	1.08316	sim_209	2725220000	facets	0.513774
0.681784	0.63776	1.59142	sim_21	2685430000	facets	0.859921
0.908671	0.921526	0.92523	sim_210	2736010000	facets	0.900874
0.890874	0.79216	0.431163	sim_211	2640790000	facets	0.599189
0.737057	0.741534	0.838746	sim_212	2677490000	facets	0.886321
0.689763	0.707144	0.741716	sim_213	2664670000	facets	0.427792
0.776186	0.775757	1.16634	sim_214	2703550000	facets	1
0.910777	0.814955	0.75495	sim_215	2644270000	facets	0.354162
0.553642	0.366724	1.51836	sim_216	2691960000	facets	0.927257
0.817121	0.681322	1.7401	sim_217	2689920000	facets	0.258944
0.961688	0.974752	1.34843	sim_218	2635890000	facets	0.87356
0.0458822	0.0331366	0.735786	sim_219	2693650000	facets	0.353073
0.94718	0.921602	1.02618	sim_22	2686930000	facets	0.303329
0.735677	0.710633	3.04256	sim_220	2645400000	facets	0.848152
0.940881	0.961447	1.41621	sim_221	2715260000	facets	1
0.863534	0.870442	1.13408	sim_222	2711200000	facets	0.312302
0.729635	0.526941	1.48336	sim_223	2730510000	facets	0.583136
0.860071	0.640141	3.20198	sim_224	2686100000	facets	0.70125
0.967661	0.973942	1.43991	sim_225	2709940000	facets	0.624092
0.81211	0.783289	0.712273	sim_226	2694950000	facets	1
0.929322	0.92265	1.74627	sim_227	2734210000	facets	0.790102
0.951924	0.954585	1.68098	sim_228	2708990000	facets	0.624974
0.136141	0.101402	0.554571	sim_229	2687780000	facets	0.377983
0.878336	0.855776	0.938215	sim_23	2631560000	facets	1
0.972756	0.984757	1.70189	sim_230	2697770000	facets	0.71236
0.905843	0.889828	1.0696	sim_231	2680180000	facets	0.858288
0.914282	0.800295	2.1825	sim_232	2715680000	facets	0.843926
0.922376	0.921261	0.797391	sim_233	2703150000	facets	0.254355
0.757348	0.687008	1.33999	sim_234	2700360000	facets	0.867948
0.91647	0.936148	1.14338	sim_235	2695250000	facets	0.549273
0.821384	0.817748	1.25776	sim_236	2680420000	facets	0.780694
0.964737	0.952833	1.65434	sim_237	2657760000	facets	0.549443
0.768317	0.604489	1.09271	sim_238	2739110000	facets	0.614705
0.623888	0.555364	2.69979	sim_239	2686960000	facets	0.210031
0.894747	0.824703	2.55931	sim_24	2678130000	facets	0.690937
0.791008	0.747438	1.08742	sim_240	2640850000	facets	1
0.881512	0.868324	1.15646	sim_241	2722930000	facets	0.781936
-0.011719	-0.0100324	0.524976	sim_242	2695600000	facets	0.66
0.846349	0.88184	1.15027	sim_243	2676000000	facets	0.94
0.519617	0.523563	1.57944	sim_244	2694120000	facets	0.288315
0.418455	0.0125315	2.80531	sim_245	2661980000	facets	0.249986
0.807808	0.751111	2.23047	sim_246	2700780000	facets	0.580086
0.919303	0.869853	2.56719	sim_247	2731240000	facets	0.571544
0.79431	0.835578	1.22602	sim_248	2662930000	facets	0.952804
0.952921	0.945775	1.18387	sim_249	2667350000	facets	0.275604
0.795204	0.815228	1.08757	sim_25	2714700000	facets	0.8289
0.335721	0.314978	0.574584	sim_250	2683400000	facets	0.675066
0.933259	0.923124	0.884369	sim_251	2720320000	facets	0.509227
0.454703	0.427656	1.04506	sim_252	2728160000	facets	1
0.286265	0.042616	3.05472	sim_253	2609040000	facets	0.948937
0.709946	0.545942	3.58369	sim_254	2689030000	facets	0.898025
0.269273	0.140127	3.26164	sim_255	2717850000	facets	0.304968
0.361093	0.330054	2.79672	sim_256	2726880000	facets	0.260199
0.88744	0.82276	0.708905	sim_257	2711130000	facets	0.453659
0.0172331	-0.255923	3.16884	sim_258	2680950000	facets	0.748709
0.642856	0.553187	0.969427	sim_259	2695050000	facets	0.649652
0.91452	0.933835	2.20103	sim_26	2711780000	facets	0.507385
0.934111	0.954433	1.25448	sim_260	2704310000	facets	0.819398
0.671649	0.533564	1.1347	sim_261	2700670000	facets	0.462346
0.585639	0.640964	1.98722	sim_262	2672880000	facets	0.967254
0.562698	0.602923	2.99932	sim_263	2669230000	facets	0.66114
0.878567	0.812774	3.94599	sim_264	2717720000	facets	0.752983
0.70858	0.73783	3.65221	sim_265	2683680000	facets	0.67722
0.495501	0.307943	1.77994	sim_266	2675840000	facets	0.77652
0.848398	0.599111	3.44794	sim_267	2723980000	facets	0.697544
0.968751	0.980717	0.954826	sim_268	2707500000	facets	0.950863
0.865713	0.830528	1.48915	sim_269	2712330000	facets	0.916572
0.893285	0.774985	1.58245	sim_27	2559780000	facets	0.541571
0.900027	0.883458	0.62132	sim_270	2690400000	facets	0.486144
0.835601	0.64699	1.35608	sim_271	2711660000	facets	0.74581
0.720801	0.726807	2.82292	sim_272	2700260000	facets	1
0.78624	0.712265	1.72574	sim_273	2715250000	facets	0.907184
0.902868	0.882548	0.914949	sim_274	2640850000	facets	0.515997
0.450597	0.415356	1.91694	sim_275	2653420000	facets	0.868753
0.781386	0.231007	1.72284	sim_276	2649020000	facets	0.523134
0.683854	0.567991	1.72265	sim_277	2700390000	facets	0.544336
0.516903	0.576888	1.19735	sim_278	2652740000	facets	0.989865
0.883663	0.924626	0.959952	sim_279	2689710000	facets	0.777255
0.652267	0.593613	0.663425	sim_28	2667280000	facets	0.353897
0.749268	0.785704	4.59112	sim_280	2734700000	facets	0.786041
0.959104	0.939175	1.72837	sim_281	2715000000	facets	1
0.820911	0.462405	3.81643	sim_282	2705700000	facets	0.300182
0.782994	0.82174	1.35095	sim_283	2714800000	facets	0.280643
0.955136	0.966801	1.18235	sim_284	2725700000	facets	0.854194
0.91736	0.941683	0.956091	sim_285	2670850000	facets	0.557121
0.803095	0.798607	3.18828	sim_286	2729320000	facets	0.924617
0.925407	0.857094	1.37317	sim_287	2682900000	facets	0.298503
0.861456	0.870628	1.02708	sim_288	2673450000	facets	0.952423
0.296957	0.379389	1.84876	sim_289	2723250000	facets	0.505645
0.801531	0.698465	2.26963	sim_29	2654660000	facets	0.303491
0.964874	0.979703	2.05247	sim_290	2726640000	facets	0.463721
0.903598	0.849454	1.00944	sim_291	2709740000	facets	0.46917
0.379186	0.326962	0.792625	sim_292	2717990000	facets	0.789134
0.617078	0.66357	2.97053	sim_293	2674860000	facets	0.520887
0.867324	0.843668	1.59261	sim_294	2716900000	facets	0.873565
0.922834	0.939917	1.83631	sim_295	2654050000	facets	0.677175
0.705027	0.740377	1.15713	sim_296	2730160000	facets	0.468841
0.903464	0.820563	1.04205	sim_297	2695150000	facets	0.79
0.840972	0.819926	1.65741	sim_298	2703890000	facets	0.771524
0.798319	0.62604	1.08006	sim_299	2726420000	facets	0.5237
0.910814	0.816249	4.86631	sim_3	2702820000	facets	0.969348
0.897521	0.933751	0.80958	sim_30	2652500000	facets	0.16
0.700504	0.718625	1.24053	sim_300	2725450000	facets	0.518671
0.933751	0.877431	1.0046	sim_301	2702860000	facets	1
0.659623	0.497859	3.19681	sim_302	2728390000	facets	0.918372
0.777142	0.782738	3.67349	sim_303	2730660000	facets	0.462689
0.930511	0.926563	1.66209	sim_304	2654770000	facets	0.621918
0.698583	0.736144	2.14558	sim_305	2695420000	facets	0.710255
0.730924	0.61249	0.64545	sim_306	2649910000	facets	0.959169
0.311574	-0.00722989	2.60638	sim_307	2700920000	facets	0.608756
0.940095	0.94873	1.64949	sim_308	2747440000	facets	1
0.915167	0.912286	0.857549	sim_309	2730590000	facets	0.958941
0.892051	0.908087	0.853753	sim_31	2723080000	facets	0.896305
0.893566	0.805087	4.11045	sim_310	2734910000	facets	0.558035
0.53486	0.443186	3.50922	sim_311	2600640000	facets	0.333847
0.681474	0.579951	1.38358	sim_312	2713160000	facets	0.793784
0.668075	0.619413	0.951183	sim_313	2740680000	facets	0.944593
0.89872	0.736344	2.51029	sim_314	2679590000	facets	0.746882
0.891046	0.869834	1.3956	sim_315	2631100000	facets	0.11
0.939256	0.927585	0.908635	sim_316	2704290000	facets	0.789506
0.126067	0.0908602	2.83825	sim_317	2743890000	facets	0.41858
0.480785	0.345454	1.59027	sim_318	2698410000	facets	0.31714
0.35492	0.576141	1.94005	sim_319	2669760000	facets	0.498444
0.82591	0.853329	1.88432	sim_32	2726110000	facets	0.267263
0.671544	0.547269	2.58105	sim_320	2724340000	facets	0.86872
0.913188	0.861934	1.05441	sim_321	2703070000	facets	0.240015
0.715653	0.536195	1.04952	sim_322	2668320000	facets	0.927771
0.934703	0.814535	1.62708	sim_323	2721870000	facets	1
0.902161	0.945932	1.12556	sim_324	2677100000	facets	0.668238
0.911973	0.886222	1.41828	sim_325	2685160000	facets	1
0.738585	0.77063	1.18399	sim_326	2730800000	facets	0.318056
0.732106	0.678468	0.796224	sim_327	2638350000	facets	0.643557
0.431927	0.218852	3.60178	sim_328	2700290000	facets	0.457494
0.87358	0.932132	1.5153	sim_329	2718260000	facets	0.782708
0.93784	0.948304	1.4761	sim_33	2665530000	facets	1
0.81597	0.832858	0.821517	sim_330	2728420000	facets	1
0.834532	0.675942	3.88508	sim_331	2731930000	facets	0.917513
0.570565	0.343366	2.47486	sim_332	2696790000	facets	0.714814
0.935798	0.921868	1.0728	sim_333	2703130000	facets	0.269886
0.3237	0.188265	3.22372	sim_334	2693070000	facets	0.333647
0.494465	0.438693	2.49438	sim_335	2694010000	facets	0.38
0.801705	0.716262	3.57474	sim_336	2703800000	facets	0.613136
0.541538	0.599322	1.84906	sim_337	2706330000	facets	1
0.610087	0.499564	1.48237	sim_338	2707600000	facets	0.989764
0.700583	0.674073	2.3609	sim_339	2709110000	facets	0.653577
0.902756	0.902525	0.96473	sim_34	2663240000	facets	0.688112
0.77147	0.776414	1.20737	sim_340	2726410000	facets	1
0.821857	0.774854	0.517914	sim_341	2643130000	facets	0.836994
0.085327	0.0673887	0.756519	sim_342	2717560000	facets	0.717932
0.0850536	-0.105831	2.95008	sim_343	2694570000	facets	0.969352
0.926002	0.791448	0.945319	sim_344	2658340000	facets	0.660166
0.724487	0.711044	1.03127	sim_345	2666020000	facets	1
0.628224	0.706983	1.57938	sim_346	2747180000	facets	0.373276
0.858728	0.901381	0.623898	sim_347	2723430000	facets	0.786751
0.95532	0.925261	1.71146	sim_348	2674860000	facets	0.893937
0.816805	0.803791	1.3901	sim_349	2710470000	facets	0.795595
0.795334	0.790398	1.33387	sim_35	2718390000	facets	0.191492
0.847205	0.900974	2.8415	sim_350	2708830000	facets	0.779156
0.870144	0.846807	1.69242	sim_351	2694980000	facets	0.693103
0.697944	0.669375	2.91488	sim_352	2673550000	facets	0.575592
0.755744	0.851138	2.28789	sim_353	2683810000	facets	0.9434
0.743398	0.760808	1.19068	sim_354	2727680000	facets	1
0.872514	0.809619	1.13337	sim_355	2693120000	facets	1
0.545574	0.303438	1.52136	sim_356	2707710000	facets	0.229286
0.593683	0.657339	1.18997	sim_357	2694520000	facets	0.959103
0.881072	0.935379	1.92691	sim_358	2712590000	facets	0.275733
0.412212	0.153671	3.52187	sim_359	2725310000	facets	0.634337
0.865029	0.869083	1.71448	sim_36	2701130000	facets	0.677426
0.760641	0.683651	1.33391	sim_360	2711650000	facets	0.543064
0.8075	0.614601	3.46506	sim_361	2689880000	facets	1
0.931941	0.862553	2.28195	sim_362	2725560000	facets	0.92076
0.835335	0.687123	0.638396	sim_363	2707170000	facets	0.225963
0.654983	0.686032	2.22361	sim_364	2711060000	facets	1
0.977876	0.736447	4.2295	sim_365	2706540000	facets	0.729391
0.880336	0.906569	1.2071	sim_366	2735880000	facets	0.875355
0.483954	0.296688	1.50322	sim_367	2718300000	facets	0.928555
0.666715	0.726319	1.50846	sim_368	2740310000	facets	0.80412
0.671413	0.446235	1.04016	sim_369	2671110000	facets	0.727682
0.605731	0.485601	1.44483	sim_37	2684990000	facets	0.452925
0.428439	0.437921	0.692656	sim_370	2693720000	facets	0.226751
0.933851	0.550961	5.51305	sim_371	2644360000	facets	0.741284
0.915894	0.908794	1.87623	sim_372	2675920000	facets	0.622521
0.90066	0.846474	1.86708	sim_373	2716970000	facets	1
0.677793	0.700449	3.57653	sim_374	2699340000	facets	0.3
0.750345	0.742035	1.02116	sim_375	2739240000	facets	0.949156
0.512488	0.339454	2.94729	sim_376	2694520000	facets	0.610147
0.897231	0.854781	3.81987	sim_377	2725840000	facets	0.989991
0.693503	0.669067	1.63992	sim_378	2736070000	facets	0.318313
0.887265	0.889744	0.948573	sim_379	2729800000	facets	0.540685
0.721665	0.699822	1.79866	sim_38	2670730000	facets	0.676738
0.803144	0.747744	1.34436	sim_380	2733740000	facets	0.407444
0.572545	0.542832	3.78939	sim_381	2681950000	facets	0.334534
0.897739	0.825023	2.67065	sim_382	2690570000	facets	1
0.67478	0.591005	3.23369	sim_383	2718620000	facets	0.206056
0.678995	0.726926	0.615038	sim_384	2663090000	facets	1
0.928023	0.845028	0.922757	sim_385	2682260000	facets	0.714667
0.656895	0.739295	2.08645	sim_386	2698170000	facets	0.742278
0.712302	0.675432	0.849122	sim_387	2701550000	facets	0.274961
0.814476	0.779776	1.3582	sim_388	2674720000	facets	0.265269
0.879027	0.905426	1.10368	sim_389	2716940000	facets	0.28507
0.522294	0.399012	1.71915	sim_39	2668040000	facets	0.482519
0.890166	0.750151	0.925194	sim_390	2661480000	facets	0.865282
0.920228	0.927905	1.39853	sim_391	2712390000	facets	0.718025
0.757148	0.730764	1.88916	sim_392	2586980000	facets	0.722832
0.950239	0.830485	1.13787	sim_393	2642680000	facets	0.681826
0.401336	0.330247	3.00823	sim_394	2665320000	facets	0.41697
0.849198	0.841085	2.10647	sim_395	2719750000	facets	0.35
0.82442	0.736246	2.10501	sim_396	2729420000	facets	0.641664
0.801036	0.735984	1.38934	sim_397	2730850000	facets	0.430104
0.0711721	0.0624584	0.534231	sim_398	2656890000	facets	0.796021
0.724526	0.25398	2.65504	sim_399	2738440000	facets	0.647736
0.918987	0.904643	1.73963	sim_4	2672980000	facets	0.564132
0.289449	0.123445	1.83214	sim_40	2716520000	facets	0.78692
0.229064	0.164935	3.42325	sim_400	2651030000	facets	0.862223
0.731559	0.699556	1.19179	sim_401	2728050000	facets	0.924917
0.936577	0.739281	1.77915	sim_402	2724390000	facets	0.413632
0.73254	0.544457	1.7628	sim_403	2683190000	facets	0.838234
0.748303	0.680442	0.76143	sim_404	2714390000	facets	0.826076
0.852942	0.860239	1.45196	sim_405	2712240000	facets	1
0.776665	0.579899	1.4414	sim_406	2691590000	facets	0.743091
0.711385	0.693288	1.25053	sim_407	2688270000	facets	0.401019
0.732526	0.677691	0.941029	sim_408	2740400000	facets	0.745554
0.935232	0.843289	0.700839	sim_409	2656750000	facets	1
0.900632	0.903261	1.06778	sim_41	2665150000	facets	0.261594
0.876442	0.433239	1.87397	sim_410	2670290000	facets	0.317948
0.85023	0.853852	1.38214	sim_411	2734830000	facets	0.843489
0.934907	0.953696	1.46101	sim_412	2686980000	facets	0.687048
0.79644	0.800451	1.25531	sim_413	2727960000	facets	0.865852
0.740126	0.764471	1.51805	sim_414	2681490000	facets	0.377782
0.496963	0.343563	3.04104	sim_415	2709650000	facets	0.65493
0.875911	0.882453	1.08038	sim_416	2657100000	facets	0.968936
0.860117	0.904952	2.89824	sim_417	2707920000	facets	0.458258
0.885227	0.741737	3.60986	sim_418	2664910000	facets	0.884539
0.696882	0.683964	2.25766	sim_419	2650220000	facets	0.960266
0.407266	0.592968	0.900139	sim_42	2695030000	facets	0.948935
0.277713	0.0204188	2.71722	sim_420	2699220000	facets	0.336706
0.93068	0.954066	1.64178	sim_421	2728150000	facets	0.826121
0.781338	0.814872	0.690183	sim_422	2624840000	facets	1
0.0320427	0.0402397	3.30942	sim_423	2703470000	facets	1
0.938823	0.887783	1.11846	sim_424	2703920000	facets	0.935687
0.466878	0.275089	0.756169	sim_425	2703560000	facets	0.885385
0.788533	0.770005	1.62506	sim_426	2733670000	facets	0.786417
0.561405	0.678537	1.31166	sim_427	2673600000	facets	0.744315
0.200177	0.138467	0.313046	sim_428	2691270000	facets	0.897864
0.884351	0.861002	2.47645	sim_429	2695840000	facets	0.641856
0.790167	0.652391	0.952831	sim_43	2677270000	facets	0.721808
0.531417	0.166676	0.663356	sim_430	2690730000	facets	0.611356
0.957511	0.967659	1.07854	sim_431	2709170000	facets	0.766062
0.947067	0.911855	1.06799	sim_432	2699780000	facets	0.197344
0.939181	0.940943	0.937333	sim_433	2660890000	facets	0.635996
0.894409	0.894752	0.811144	sim_434	2601850000	facets	0.530374
0.698095	0.391903	1.53344	sim_435	2680410000	facets	0.949189
0.864631	0.785488	1.00531	sim_436	2718450000	facets	0.567143
0.137458	0.129596	0.706345	sim_437	2638600000	facets	0.268902
0.739715	0.720878	0.950345	sim_438	2692100000	facets	0.867552
0.841387	0.742517	3.47196	sim_439	2659770000	facets	0.552052
0.786915	0.764703	0.865481	sim_44	2660850000	facets	0.889603
0.964364	0.974475	0.950028	sim_440	2677490000	facets	0.830902
0.81113	0.863098	1.18553	sim_441	2693180000	facets	0.818271
0.662813	0.653171	0.654796	sim_442	2680720000	facets	0.725204
0.775214	0.733527	1.19465	sim_443	2693690000	facets	0.192515
0.68488	0.689485	2.2907	sim_444	2680310000	facets	0.817106
0.618164	0.633542	1.47674	sim_445	2737480000	facets	1
0.596179	0.489569	2.36121	sim_446	2727210000	facets	0.422425
0.41338	0.163684	2.67025	sim_447	2726560000	facets	0.823593
0.554872	0.647491	2.8188	sim_448	2685280000	facets	0.744323
0.493075	0.422247	2.23725	sim_449	2654600000	facets	0.389723
0.829159	0.744949	1.40649	sim_45	2677330000	facets	0.517582
0.836354	0.790216	0.970269	sim_450	2728810000	facets	1
0.805457	0.737976	2.12617	sim_451	2708390000	facets	0.385513
0.947992	0.952546	1.31729	sim_452	2706310000	facets	0.633354
0.905826	0.880326	2.14422	sim_453	2710480000	facets	0.629795
0.88547	0.887087	2.09534	sim_454	2698000000	facets	0.265704
0.95057	0.962249	2.87211	sim_455	2707770000	facets	1
0.658255	0.642007	1.50576	sim_456	2711470000	facets	0.83
0.685263	0.594096	1.50647	sim_457	2720530000	facets	0.940748
0.790984	0.656359	1.49843	sim_458	2727330000	facets	0.714633
0.398071	0.380662	1.07127	sim_459	2672660000	facets	0.638617
0.906643	0.761506	0.599124	sim_46	2665920000	facets	0.861985
0.884955	0.92086	1.77568	sim_460	2698540000	facets	0.592665
0.91528	0.914042	1.12511	sim_461	2724970000	facets	1
0.328735	0.488535	2.10442	sim_462	2652050000	facets	0.84806
0.591649	0.534806	0.844365	sim_463	2669930000	facets	0.912713
0.695276	0.416946	3.89927	sim_464	2667050000	facets	0.89344
0.631615	0.668255	2.34441	sim_465	2710740000	facets	0.890469
0.895103	0.897345	0.938399	sim_466	2717620000	facets	0.781782
0.822727	0.71175	1.97716	sim_467	2655850000	facets	0.887043
0.914556	0.92546	1.04356	sim_468	2683530000	facets	0.427608
0.577373	0.548592	3.57549	sim_469	2691820000	facets	0.863679
0.824215	0.516149	3.63583	sim_47	2682160000	facets	0.363221
0.501619	0.44426	2.49119	sim_470	2668990000	facets	0.673408
0.853588	0.893856	2.8623	sim_471	2712520000	facets	0.540079
0.965829	0.958837	3.49745	sim_472	2666560000	facets	1
0.845499	0.853743	1.55255	sim_473	2722750000	facets	0.327754
0.322508	0.329823	0.686101	sim_474	2655390000	facets	0.223459
0.274259	0.221196	0.560683	sim_475	2670770000	facets	0.814209
0.748787	0.593076	1.37185	sim_476	2690940000	facets	0.874726
0.808268	0.757409	1.7228	sim_477	2682310000	facets	0.698743
0.783063	0.608611	2.46525	sim_478	2688830000	facets	0.760167
0.804457	0.845595	1.80526	sim_479	2687440000	facets	0.67
0.957349	0.943427	1.07708	sim_48	2710720000	facets	0.699813
0.939672	0.932098	1.71007	sim_480	2683750000	facets	0.447337
0.921667	0.90708	0.994771	sim_481	2694670000	facets	0.46334
0.807231	0.82246	1.15538	sim_482	2677310000	facets	0.563594
0.748967	0.675172	1.06313	sim_483	2654830000	facets	0.892015
0.951415	0.973101	1.44029	sim_484	2706810000	facets	0.389492
0.910174	0.913662	0.925191	sim_485	2710660000	facets	0.989782
0.789023	0.826164	1.44234	sim_486	2731240000	facets	0.416898
0.797765	0.678745	1.86868	sim_487	2674710000	facets	1
0.965573	0.956174	1.07009	sim_488	2698060000	facets	0.609243
0.612835	0.369702	2.15501	sim_489	2687840000	facets	0.23822
0.940168	0.929255	1.47381	sim_49	2730080000	facets	0.767859
0.470527	0.409201	1.08271	sim_490	2729860000	facets	0.322311
0.609141	0.670292	2.02707	sim_491	2653160000	facets	0.633081
0.771187	0.696481	0.779759	sim_492	2691140000	facets	0.77535
0.827069	0.81771	3.1836	sim_493	2704260000	facets	0.516871
0.782688	0.75697	1.63156	sim_494	2697470000	facets	0.69459
0.52057	0.396892	3.58363	sim_495	2667210000	facets	0.405209
0.83729	0.781326	0.869356	sim_496	2654410000	facets	0.52926
0.521634	0.402187	1.6927	sim_497	2725040000	facets	0.41
0.904124	0.931374	0.921509	sim_498	2698200000	facets	0.276281
0.913476	0.926345	0.986741	sim_499	2704600000	facets	0.766823
0.925664	0.928563	1.45827	sim_5	2708400000	facets	0.292948
-0.000303598	-0.000142965	7.9215	sim_50	2696820000	facets	0.763648
0.634187	0.343713	1.34841	sim_500	2699630000	facets	0.896056
0.827778	0.852932	1.13763	sim_51	2723450000	facets	0.927638
0.945697	0.867826	1.70824	sim_52	2680230000	facets	0.416136
0.321478	-0.00951857	3.67311	sim_53	2638500000	facets	0.69
0.866251	0.572172	1.89868	sim_54	2709030000	facets	0.504846
0.893199	0.716113	1.13706	sim_55	2712650000	facets	0.12
0.751197	0.429811	0.419629	sim_56	2665400000	facets	0.367913
0.849565	0.831311	2.38239	sim_57	2740470000	facets	0.279907
0.760866	0.823019	1.33243	sim_58	2733820000	facets	0.339236
0.627386	0.318314	2.95524	sim_59	2686900000	facets	0.919026
0.51208	0.243304	2.26864	sim_6	2646850000	facets	0.801615
0.858448	0.857038	2.04076	sim_60	2693060000	facets	0.91783
0.782045	0.776985	1.42537	sim_61	2708910000	facets	0.627691
0.896753	0.876188	2.13911	sim_62	2650880000	facets	0.329397
0.933616	0.65767	0.608319	sim_63	2668730000	facets	0.746104
0.945552	0.945878	1.91051	sim_64	2732050000	facets	0.724349
0.880932	0.930402	1.43503	sim_65	2719970000	facets	0.653693
0.838123	0.831748	0.701832	sim_66	2688740000	facets	1
0.755979	0.534727	0.566122	sim_67	2666290000	facets	1
0.85115	0.764106	1.3748	sim_68	2726270000	facets	0.515443
0.524869	0.50325	1.99454	sim_69	2718210000	facets	0.934751
0.699332	0.524889	1.30836	sim_7	2692990000	facets	0.754866
0.90693	0.892823	2.12335	sim_70	2703110000	facets	0.348559
0.715394	0.524817	0.659896	sim_71	2711390000	facets	0.389035
0.226281	0.0759827	3.50616	sim_72	2679680000	facets	0.635623
0.630194	0.600592	3.001	sim_73	2667470000	facets	0.621706
0.774928	0.727569	2.65174	sim_74	2684680000	facets	0.683652
0.846468	0.845788	1.93249	sim_75	2702590000	facets	1
0.825572	0.722015	0.613857	sim_76	2726590000	facets	0.694886
0.927812	0.856375	1.15484	sim_77	2712440000	facets	0.417966
0.903904	0.898999	2.27321	sim_78	2708950000	facets	0.345368
0.931048	0.942648	2.68464	sim_79	2722150000	facets	0.808894
0.341246	0.240303	1.49793	sim_8	2719240000	facets	0.802454
0.584714	0.761417	2.06669	sim_80	2667200000	facets	0.437851
0.572361	0.423592	1.63283	sim_81	2685900000	facets	0.640787
0.105559	0.294694	2.98026	sim_82	2666710000	facets	0.692884
0.559698	0.392069	2.89728	sim_83	2667340000	facets	0.544421
0.766501	0.814869	1.85778	sim_84	2709920000	facets	0.9694
0.893766	0.874174	0.940178	sim_85	2693950000	facets	0.76663
0.940821	0.940893	8.01232	sim_86	2699050000	facets	0.938751
0.764633	0.737593	1.20215	sim_87	2698350000	facets	0.826133
0.734969	0.870678	1.52514	sim_88	2698050000	facets	0.967223
0.723122	0.705436	1.19985	sim_89	2717740000	facets	0.791668
0.327213	-0.00317977	3.54647	sim_9	2705910000	facets	0.784922
0.136589	-0.103488	2.8722	sim_90	2671570000	facets	0.402183
0.801152	0.91164	2.67919	sim_91	2732740000	facets	0.444439
0.607691	0.276415	1.47016	sim_92	2681250000	facets	0.590287
0.446928	0.1365	2.9753	sim_93	2725880000	facets	0.617735
0.836083	0.637936	3.56842	sim_94	2720230000	facets	0.58003
0.229577	-0.00648487	2.72276	sim_95	2729800000	facets	0.509099
0.933753	0.91949	2.05178	sim_96	2711060000	facets	0.488378
0.8668	0.877985	0.989908	sim_97	2693580000	facets	0.76516
0.86991	0.641777	1.0203	sim_98	2708640000	facets	0.397565
0.882414	0.879297	1.33343	sim_99	2669770000	facets	0.700552
0.983054	0.99407	0.292561	sim_1	2601620000	titan	1
0.955041	0.991058	0.185621	sim_10	2604160000	titan	0.604324
0.943868	0.928718	0.16592	sim_100	2603600000	titan	0.826476
0.94662	0.911248	0.644559	sim_101	2598220000	titan	0.878798
0.911348	0.899567	0.244113	sim_102	2604590000	titan	0.615282
0.989838	0.998455	0.110081	sim_103	2604320000	titan	0.98101
0.764041	0.810354	0.503274	sim_104	2602400000	titan	0.66477
0.998113	0.998441	0.0271499	sim_105	2604510000	titan	0.860313
0.898054	0.935585	0.174699	sim_106	2603780000	titan	0.223827
0.709327	0.582676	2.04631	sim_107	2601060000	titan	0.796065
0.755241	0.797888	0.0618253	sim_108	2604630000	titan	0.744101
0.781071	0.755986	0.835015	sim_109	2596760000	titan	0.889151
0.923198	0.995029	0.129513	sim_11	2604560000	titan	0.729402
0.925723	0.931918	2.26996	sim_110	2603060000	titan	1
0.96266	0.944614	0.160567	sim_111	2604040000	titan	0.582241
0.97364	0.99555	0.141251	sim_112	2604280000	titan	0.838275
0.976847	0.981775	0.0568926	sim_113	2604680000	titan	0.612104
0.956156	0.964261	0.981672	sim_114	2600090000	titan	0.437141
0.997087	0.998816	0.102691	sim_115	2592360000	titan	0.86
0.825765	0.841722	2.63805	sim_116	2599500000	titan	0.564662
0.764338	0.777948	0.225996	sim_117	2604060000	titan	0.55466
0.911911	0.986684	2.08715	sim_118	2603320000	titan	0.54599
0.97811	0.997044	2.36766	sim_119	2603680000	titan	1
0.995832	0.997171	0.0325458	sim_12	2604630000	titan	0.700761
0.947246	0.978131	0.0826207	sim_120	2604020000	titan	0.917769
0.554777	0.532889	2.31216	sim_121	2598200000	titan	0.329325
0.628645	0.443957	1.97306	sim_122	2600660000	titan	1
0.985209	0.996903	0.242109	sim_123	2594430000	titan	1
0.978465	0.99043	0.243957	sim_124	2596060000	titan	0.625519
0.818667	0.829423	0.473548	sim_125	2600960000	titan	0.272669
0.493702	0.456164	1.66375	sim_126	2592870000	titan	0.683799
0.990977	0.994481	0.17611	sim_127	2603340000	titan	0.786554
0.880688	0.888429	0.233539	sim_128	2604220000	titan	0.29
0.978917	0.994861	0.39018	sim_129	2597440000	titan	0.909245
0.631668	0.6004	2.07362	sim_13	2587140000	titan	0.14
0.58868	0.79328	0.489998	sim_130	2603470000	titan	0.989529
0.972579	0.993027	2.44519	sim_131	2604020000	titan	0.737661
[truncated: 961 more rows]

## Sheet: 3G_ALLELIC
pearson.cn	spearman.cn	rmse	pair	query.width	method	purity
0.992652	0.994198	0.111761	sim_1	5495480000	JaBbA v1	1
0.90586	0.822197	1.09318	sim_10	5495760000	JaBbA v1	0.604324
0.754174	0.760083	0.235904	sim_100	5499860000	JaBbA v1	0.826476
0.951658	0.878581	0.447753	sim_101	5496420000	JaBbA v1	0.878798
0.990584	0.994899	0.0671088	sim_102	5500580000	JaBbA v1	0.615282
0.999449	0.999947	0.0188504	sim_103	5500500000	JaBbA v1	0.98101
0.957408	0.954191	0.162412	sim_104	5500580000	JaBbA v1	0.66477
0.933354	0.917222	0.131207	sim_105	5500580000	JaBbA v1	0.860313
0.500511	0.500512	0.341911	sim_106	5499980000	JaBbA v1	0.223827
0.992063	0.992005	0.0282109	sim_107	5500580000	JaBbA v1	0.796065
0.973085	0.972241	0.0167838	sim_108	5499960000	JaBbA v1	0.744101
0.964731	0.914116	0.229239	sim_109	5500520000	JaBbA v1	0.889151
0.961089	0.961281	0.0607559	sim_11	5500580000	JaBbA v1	0.729402
0.94673	0.973052	0.151429	sim_110	5499980000	JaBbA v1	1
0.999736	0.999541	0.011908	sim_111	5500460000	JaBbA v1	0.582241
0.999035	0.99826	0.0223525	sim_112	5499980000	JaBbA v1	0.838275
0.984524	0.984528	0.0365753	sim_113	5499840000	JaBbA v1	0.612104
0.921275	0.896544	0.517158	sim_114	5499840000	JaBbA v1	0.437141
0.972089	0.9551	0.250971	sim_115	5495560000	JaBbA v1	0.86
0.906222	0.900103	0.203925	sim_116	5496400000	JaBbA v1	0.564662
0.998881	0.998779	0.011697	sim_117	5499820000	JaBbA v1	0.55466
0.928828	0.926485	0.157105	sim_118	5500580000	JaBbA v1	0.54599
0.951557	0.941171	0.187012	sim_119	5495760000	JaBbA v1	1
1	1	3.98179e-07	sim_12	5495680000	JaBbA v1	0.700761
0.990426	0.999902	0.0426222	sim_120	5496320000	JaBbA v1	0.917769
0.539155	0.493115	0.593362	sim_121	5498900000	JaBbA v1	0.329325
0.90274	0.916488	0.122178	sim_122	5500580000	JaBbA v1	1
0.996558	0.997091	0.0713448	sim_123	5500540000	JaBbA v1	1
0.956508	0.937204	0.231816	sim_124	5498840000	JaBbA v1	0.625519
0.749818	0.755665	0.412817	sim_125	5499960000	JaBbA v1	0.272669
0.956712	0.907427	0.229453	sim_126	5495800000	JaBbA v1	0.683799
0.999739	0.999835	0.0249463	sim_127	5500380000	JaBbA v1	0.786554
0.362111	0.256719	0.437787	sim_128	5495800000	JaBbA v1	0.29
0.983191	0.982269	0.276329	sim_129	5495620000	JaBbA v1	0.909245
0.846587	0.833023	0.835496	sim_13	5500360000	JaBbA v1	0.14
0.993089	0.992874	0.0229577	sim_130	5500500000	JaBbA v1	0.989529
0.999471	0.999824	0.0198842	sim_131	5495680000	JaBbA v1	0.737661
0.995706	0.984447	0.123724	sim_132	5500480000	JaBbA v1	0.733376
0.59508	0.45637	1.7236	sim_133	5495660000	JaBbA v1	0.14
0.755502	0.667109	1.01284	sim_134	5495820000	JaBbA v1	0.826404
0.953823	0.910702	0.245277	sim_135	5500580000	JaBbA v1	0.682461
0.879686	0.846323	0.432164	sim_136	5495720000	JaBbA v1	0.746479
0.992766	0.997935	0.146421	sim_137	5500400000	JaBbA v1	0.651578
0.990423	0.985052	0.135614	sim_138	5495920000	JaBbA v1	0.917389
0.98739	0.975679	0.112295	sim_139	5496420000	JaBbA v1	0.793126
0.986298	0.986774	0.064271	sim_14	5495820000	JaBbA v1	0.760885
1	1	0.000153985	sim_140	5495800000	JaBbA v1	0.844597
0.488657	0.491293	0.0223038	sim_141	5499960000	JaBbA v1	0.710192
0.704946	0.667161	0.756108	sim_142	5499940000	JaBbA v1	0.393888
0.976123	0.89257	0.230844	sim_143	5495580000	JaBbA v1	0.86
0.996775	0.999437	0.134661	sim_144	5497900000	JaBbA v1	0.979862
0.971481	0.967703	0.229472	sim_145	5496180000	JaBbA v1	0.913307
0.984541	0.833607	0.22541	sim_146	5495800000	JaBbA v1	0.936464
0.992989	0.9998	0.194453	sim_147	5500380000	JaBbA v1	0.657429
0.986094	0.977857	0.275248	sim_148	5494400000	JaBbA v1	1
0.834092	0.704372	0.306801	sim_149	5496320000	JaBbA v1	0.245767
0.817755	0.880552	0.947074	sim_15	5499960000	JaBbA v1	0.20388
		1	sim_150	5499840000	JaBbA v1	0.937374
0.999991	0.99994	0.000736479	sim_151	5496420000	JaBbA v1	0.82536
0.970298	0.946015	0.0731432	sim_152	5497440000	JaBbA v1	1
0.765065	0.770038	0.351514	sim_153	5495920000	JaBbA v1	0.492672
0.999648	0.999693	0.00500211	sim_154	5500580000	JaBbA v1	0.919295
0.974833	0.955516	1.43991	sim_155	5497460000	JaBbA v1	0.266097
0.930303	0.876478	0.250381	sim_156	5499880000	JaBbA v1	0.519862
0.64831	0.790645	1.11483	sim_157	5496360000	JaBbA v1	0.791034
0.998071	0.997438	0.0326011	sim_158	5500440000	JaBbA v1	1
0.186451	0.190118	0.760861	sim_159	5499960000	JaBbA v1	0.1
0.97576	0.972097	0.262659	sim_16	5495640000	JaBbA v1	0.919395
0.757235	0.720951	0.522265	sim_160	5499620000	JaBbA v1	0.339131
0.999976	0.999908	0.000958165	sim_161	5495820000	JaBbA v1	0.828309
0.821745	0.831353	0.237336	sim_162	5499980000	JaBbA v1	0.881212
0.764179	0.765043	0.233925	sim_163	5500580000	JaBbA v1	0.372431
1	1	0	sim_164	5500580000	JaBbA v1	0.761675
0.895493	0.81102	0.229328	sim_165	5495700000	JaBbA v1	0.948585
0.894132	0.966349	0.988555	sim_166	5495740000	JaBbA v1	0.375182
0.92386	0.904877	0.292455	sim_167	5495740000	JaBbA v1	1
0.958214	0.966369	0.291014	sim_168	5495800000	JaBbA v1	0.473909
0.998134	0.997537	0.0239318	sim_169	5495800000	JaBbA v1	0.922356
0.992683	0.991742	0.0665283	sim_17	5500520000	JaBbA v1	0.739469
0.0337873	0.0588342	0.33708	sim_170	5499980000	JaBbA v1	0.209723
0.998317	0.999998	0.0437198	sim_171	5495820000	JaBbA v1	0.971931
0.930028	0.888016	0.297606	sim_172	5499960000	JaBbA v1	0.483497
0.952189	0.939016	0.974255	sim_173	5495800000	JaBbA v1	0.491577
0.946398	0.936333	0.742006	sim_174	5495100000	JaBbA v1	0.48032
0.991983	0.991199	0.0170735	sim_175	5500480000	JaBbA v1	0.90276
0.995187	0.999639	0.0884899	sim_176	5499100000	JaBbA v1	0.719924
0.943363	0.904952	0.217542	sim_177	5500460000	JaBbA v1	0.979786
0.950707	0.956322	1.02307	sim_178	5495760000	JaBbA v1	0.830074
-0.000124124	-0.000124718	1.00017	sim_179	5499980000	JaBbA v1	0.231211
0.69991	0.808362	0.0192771	sim_18	5500320000	JaBbA v1	0.581804
0.999061	0.998824	0.0215361	sim_180	5495700000	JaBbA v1	0.849926
0.405459	0.332335	0.301123	sim_181	5496420000	JaBbA v1	0.887861
1	1	2.69735e-07	sim_182	5499960000	JaBbA v1	0.990056
0.960361	0.948599	0.723247	sim_183	5500180000	JaBbA v1	0.435889
0.96374	0.990148	0.114617	sim_184	5495780000	JaBbA v1	0.566711
0.994191	0.999216	0.0855158	sim_185	5499820000	JaBbA v1	0.683831
0.95932	0.923004	0.229612	sim_186	5499560000	JaBbA v1	1
0.980891	0.998592	0.0975186	sim_187	5500500000	JaBbA v1	0.539731
0.999741	0.999235	0.0148312	sim_188	5497580000	JaBbA v1	0.799994
0.999426	0.998637	0.0149976	sim_189	5500580000	JaBbA v1	0.612407
0.65299	0.580168	0.886359	sim_19	5490920000	JaBbA v1	0.287477
0.950592	0.851746	0.577164	sim_190	5499520000	JaBbA v1	0.526432
0.934884	0.860474	0.229956	sim_191	5495800000	JaBbA v1	0.89869
0.997614	0.996904	0.0230192	sim_192	5495760000	JaBbA v1	1
0.890134	0.771665	1.09625	sim_193	5495820000	JaBbA v1	0.791998
0.701066	0.698804	0.230414	sim_194	5499860000	JaBbA v1	1
0.491105	0.465021	0.60385	sim_195	5499000000	JaBbA v1	0.449256
0.820697	0.761175	0.188741	sim_196	5499980000	JaBbA v1	0.824689
0.493977	0.331085	1.01824	sim_197	5495640000	JaBbA v1	0.627567
0.999534	0.999638	0.00599665	sim_198	5500580000	JaBbA v1	0.959985
0.995131	0.991747	0.0193321	sim_199	5495800000	JaBbA v1	0.659281
		1.0051	sim_2	5500500000	JaBbA v1	0.754893
0.834497	0.880186	1.067	sim_20	5495300000	JaBbA v1	0.495866
0.999811	0.999721	0.00773491	sim_200	5499880000	JaBbA v1	1
0.846047	0.850011	0.476529	sim_201	5496340000	JaBbA v1	0.729961
0.940503	0.948765	0.229987	sim_202	5499900000	JaBbA v1	0.835882
0.996233	0.990711	0.0941354	sim_203	5496620000	JaBbA v1	0.725093
0.999977	0.99989	0.00372378	sim_204	5495800000	JaBbA v1	0.862489
0.899728	0.898122	0.427053	sim_205	5499860000	JaBbA v1	0.273873
0.945271	0.729304	0.519132	sim_206	5496300000	JaBbA v1	0.496586
0.959403	0.951611	0.422902	sim_207	5495680000	JaBbA v1	0.584756
0.907071	0.861389	0.295607	sim_208	5495660000	JaBbA v1	0.767613
0.955994	0.96885	0.628296	sim_209	5495520000	JaBbA v1	0.513774
0.99843	0.998443	0.030927	sim_21	5496060000	JaBbA v1	0.859921
0.988316	0.976722	0.188603	sim_210	5499900000	JaBbA v1	0.900874
0.998228	0.998134	0.0148601	sim_211	5500480000	JaBbA v1	0.599189
0.999364	0.998924	0.0107698	sim_212	5495820000	JaBbA v1	0.886321
0.764132	0.768978	0.229142	sim_213	5499960000	JaBbA v1	0.427792
0.916603	0.915849	0.342016	sim_214	5495700000	JaBbA v1	1
0.990846	0.991204	0.251477	sim_215	5500460000	JaBbA v1	0.354162
0.936886	0.885757	0.242692	sim_216	5495800000	JaBbA v1	0.927257
0.89168	0.886405	0.975682	sim_217	5500300000	JaBbA v1	0.258944
0.998188	0.997072	0.0474134	sim_218	5500320000	JaBbA v1	0.87356
-0.000111299	-0.000114936	0.0148615	sim_219	5500580000	JaBbA v1	0.353073
0.861275	0.898818	0.344006	sim_22	5497920000	JaBbA v1	0.303329
0.998701	0.998453	0.0119864	sim_220	5496420000	JaBbA v1	0.848152
0.971867	0.972119	0.235946	sim_221	5495760000	JaBbA v1	1
0.711565	0.644391	0.743404	sim_222	5500580000	JaBbA v1	0.312302
0.951918	0.944286	0.213424	sim_223	5499780000	JaBbA v1	0.583136
1	1	5.10896e-05	sim_224	5499880000	JaBbA v1	0.70125
0.965441	0.981914	0.436543	sim_225	5495560000	JaBbA v1	0.624092
0.999246	0.998763	0.0167507	sim_226	5500580000	JaBbA v1	1
0.996431	0.991084	0.0904787	sim_227	5495620000	JaBbA v1	0.790102
0.958046	0.961805	0.380263	sim_228	5495600000	JaBbA v1	0.624974
0.105571	0.110642	0.0341065	sim_229	5500580000	JaBbA v1	0.377983
0.998126	0.999879	0.0347021	sim_23	5495760000	JaBbA v1	1
0.997269	0.999701	0.115603	sim_230	5500100000	JaBbA v1	0.71236
0.976397	0.972456	0.189075	sim_231	5495740000	JaBbA v1	0.858288
0.999399	0.999088	0.0243944	sim_232	5499960000	JaBbA v1	0.843926
0.854854	0.870855	1.08819	sim_233	5495460000	JaBbA v1	0.254355
0.976643	0.95699	0.271059	sim_234	5496160000	JaBbA v1	0.867948
0.839828	0.7509	0.777353	sim_235	5495800000	JaBbA v1	0.549273
0.99963	0.999707	0.0223218	sim_236	5500560000	JaBbA v1	0.780694
0.981391	0.956159	0.644579	sim_237	5499600000	JaBbA v1	0.549443
0.986457	0.982581	1.02747	sim_238	5499560000	JaBbA v1	0.614705
0.446307	0.533668	1.09365	sim_239	5496420000	JaBbA v1	0.210031
0.975488	0.927873	0.276465	sim_24	5495320000	JaBbA v1	0.690937
0.953947	0.996794	0.147949	sim_240	5499960000	JaBbA v1	1
0.972322	0.96085	0.201879	sim_241	5499960000	JaBbA v1	0.781936
		0	sim_242	5499740000	JaBbA v1	0.66
0.94437	0.898415	0.232486	sim_243	5499960000	JaBbA v1	0.94
0.83688	0.824261	0.499792	sim_244	5495780000	JaBbA v1	0.288315
0.970252	0.992732	1.39051	sim_245	5500540000	JaBbA v1	0.249986
0.999281	0.999647	0.0237723	sim_246	5500400000	JaBbA v1	0.580086
0.968865	0.967749	0.886391	sim_247	5495380000	JaBbA v1	0.571544
0.999655	0.999774	0.0137242	sim_248	5496400000	JaBbA v1	0.952804
0.72517	0.570796	0.764041	sim_249	5495660000	JaBbA v1	0.275604
0.978147	0.993484	0.201333	sim_25	5498000000	JaBbA v1	0.8289
0.992191	0.991631	0.00609071	sim_250	5499820000	JaBbA v1	0.675066
0.972677	0.962671	0.774626	sim_251	5495760000	JaBbA v1	0.509227
		0.00834872	sim_252	5500580000	JaBbA v1	1
0.999331	0.999187	0.0175808	sim_253	5496220000	JaBbA v1	0.948937
0.998748	0.996352	0.0394046	sim_254	5500240000	JaBbA v1	0.898025
0.175998	0.175984	0.351224	sim_255	5499780000	JaBbA v1	0.304968
0.835372	0.800286	0.215098	sim_256	5499980000	JaBbA v1	0.260199
0.931079	0.897692	0.277736	sim_257	5500580000	JaBbA v1	0.453659
0.999819	0.999733	0.0136249	sim_258	5495600000	JaBbA v1	0.748709
0.736933	0.756935	1.01087	sim_259	5500580000	JaBbA v1	0.649652
0.961985	0.954771	0.934832	sim_26	5500320000	JaBbA v1	0.507385
0.934545	0.950697	0.298619	sim_260	5495620000	JaBbA v1	0.819398
0.820514	0.81893	1.26318	sim_261	5496420000	JaBbA v1	0.462346
0.842136	0.640383	1.07808	sim_262	5496680000	JaBbA v1	0.967254
0.761054	0.764998	0.22875	sim_263	5499940000	JaBbA v1	0.66114
0.999962	0.999919	0.0057902	sim_264	5495780000	JaBbA v1	0.752983
0.950429	0.923571	0.211149	sim_265	5496000000	JaBbA v1	0.67722
0.806955	0.617077	0.424135	sim_266	5496180000	JaBbA v1	0.77652
0.977788	0.942426	0.296976	sim_267	5499420000	JaBbA v1	0.697544
0.999505	0.999184	0.020335	sim_268	5500560000	JaBbA v1	0.950863
0.997807	0.99957	0.0379648	sim_269	5499080000	JaBbA v1	0.916572
0.923795	0.893287	0.47423	sim_27	5495680000	JaBbA v1	0.541571
0.979737	0.997125	0.156138	sim_270	5496200000	JaBbA v1	0.486144
0.967691	0.879414	0.401561	sim_271	5494920000	JaBbA v1	0.74581
0.900257	0.904242	1.08018	sim_272	5499720000	JaBbA v1	1
0.869508	0.856693	0.22861	sim_273	5495680000	JaBbA v1	0.907184
0.955566	0.963444	0.369158	sim_274	5495740000	JaBbA v1	0.515997
0.653249	0.558236	0.694599	sim_275	5495720000	JaBbA v1	0.868753
0.928686	0.903199	0.273908	sim_276	5500400000	JaBbA v1	0.523134
0.980405	0.99778	0.147385	sim_277	5500500000	JaBbA v1	0.544336
0.999857	0.999763	0.00642678	sim_278	5495820000	JaBbA v1	0.989865
0.997192	0.997193	0.0373903	sim_279	5495760000	JaBbA v1	0.777255
-0.027578	-0.0275852	0.236555	sim_28	5499960000	JaBbA v1	0.353897
0.827735	0.851791	2.15106	sim_280	5499880000	JaBbA v1	0.786041
0.670063	0.660748	0.228457	sim_281	5499740000	JaBbA v1	1
0.952294	0.994687	0.270335	sim_282	5500580000	JaBbA v1	0.300182
0.647634	0.638335	0.870095	sim_283	5500480000	JaBbA v1	0.280643
0.99644	0.998234	0.073821	sim_284	5499680000	JaBbA v1	0.854194
0.98202	0.998444	0.0731285	sim_285	5496300000	JaBbA v1	0.557121
0.939829	0.900065	0.228747	sim_286	5495760000	JaBbA v1	0.924617
0.970169	0.995962	0.431647	sim_287	5500580000	JaBbA v1	0.298503
0.982021	0.969162	0.184559	sim_288	5499080000	JaBbA v1	0.952423
0.413665	0.421629	0.249539	sim_289	5496420000	JaBbA v1	0.505645
0.525006	0.507876	0.229666	sim_29	5495820000	JaBbA v1	0.303491
0.845157	0.76998	0.793398	sim_290	5496420000	JaBbA v1	0.463721
0.995199	0.978435	1.36925	sim_291	5500460000	JaBbA v1	0.46917
0.988059	0.987522	0.00616424	sim_292	5500460000	JaBbA v1	0.789134
0.541427	0.315527	1.06728	sim_293	5499960000	JaBbA v1	0.520887
0.997926	0.998603	0.0448886	sim_294	5500560000	JaBbA v1	0.873565
0.999101	0.999744	0.0419139	sim_295	5495480000	JaBbA v1	0.677175
0.921675	0.844396	0.483216	sim_296	5498640000	JaBbA v1	0.468841
0.999786	0.999617	0.00901026	sim_297	5495700000	JaBbA v1	0.79
0.962367	0.946472	1.08954	sim_298	5495700000	JaBbA v1	0.771524
0.947491	0.931232	0.415443	sim_299	5495640000	JaBbA v1	0.5237
0.999745	0.999663	0.009174	sim_3	5495820000	JaBbA v1	0.969348
0.70509	0.640264	0.781879	sim_30	5495760000	JaBbA v1	0.16
0.976124	0.992355	0.230668	sim_300	5495520000	JaBbA v1	0.518671
0.986311	0.967935	0.382026	sim_301	5499760000	JaBbA v1	1
0.998784	0.999347	0.0307223	sim_302	5495800000	JaBbA v1	0.918372
0.963688	0.989576	0.331257	sim_303	5496220000	JaBbA v1	0.462689
0.997219	0.998907	0.0458603	sim_304	5495680000	JaBbA v1	0.621918
0.997957	0.997956	0.0246368	sim_305	5496380000	JaBbA v1	0.710255
0.866878	0.841194	0.168151	sim_306	5500580000	JaBbA v1	0.959169
0.998902	0.99882	0.0175223	sim_307	5495800000	JaBbA v1	0.608756
0.999524	0.999432	0.027036	sim_308	5495780000	JaBbA v1	1
0.988833	0.994202	0.164708	sim_309	5495760000	JaBbA v1	0.958941
0.998803	0.998918	0.0648643	sim_31	5500560000	JaBbA v1	0.896305
0.989047	0.99346	0.217501	sim_310	5495520000	JaBbA v1	0.558035
0.464597	0.468185	0.389454	sim_311	5500580000	JaBbA v1	0.333847
0.999813	0.999664	0.0238323	sim_312	5495680000	JaBbA v1	0.793784
0.999942	0.999924	0.00317671	sim_313	5499960000	JaBbA v1	0.944593
0.928767	0.871267	0.234395	sim_314	5499860000	JaBbA v1	0.746882
0.202259	0.30401	1.49526	sim_315	5499660000	JaBbA v1	0.11
0.999364	0.999145	0.0562861	sim_316	5500560000	JaBbA v1	0.789506
0.1995	0.163252	0.803403	sim_317	5471980000	JaBbA v1	0.41858
0.768115	0.762473	0.442316	sim_318	5499740000	JaBbA v1	0.31714
0.973559	0.986086	0.0191093	sim_319	5500460000	JaBbA v1	0.498444
0.650222	0.605722	0.812571	sim_32	5495820000	JaBbA v1	0.267263
0.999994	0.999981	0.000988185	sim_320	5500560000	JaBbA v1	0.86872
0.79451	0.890344	1.03979	sim_321	5499780000	JaBbA v1	0.240015
0.999991	1	0.000789282	sim_322	5499980000	JaBbA v1	0.927771
0.984755	0.969168	0.0972293	sim_323	5499920000	JaBbA v1	1
0.999223	0.999553	0.0200058	sim_324	5500340000	JaBbA v1	0.668238
0.953778	0.938617	0.225615	sim_325	5495740000	JaBbA v1	1
0.455112	0.38775	0.798022	sim_326	5499960000	JaBbA v1	0.318056
0.998794	0.998288	0.0180775	sim_327	5496420000	JaBbA v1	0.643557
0.90927	0.880609	0.270222	sim_328	5495820000	JaBbA v1	0.457494
0.860806	0.834734	0.227727	sim_329	5495780000	JaBbA v1	0.782708
0.9998	0.999937	0.0139406	sim_33	5495720000	JaBbA v1	1
0.999792	0.999525	0.00941294	sim_330	5496420000	JaBbA v1	1
0.986114	0.982901	0.245848	sim_331	5495480000	JaBbA v1	0.917513
0.974933	0.996733	0.139345	sim_332	5495800000	JaBbA v1	0.714814
0.410113	0.397038	0.834671	sim_333	5495800000	JaBbA v1	0.269886
0.345608	0.345597	0.236065	sim_334	5496420000	JaBbA v1	0.333647
0.760017	0.729006	0.802836	sim_335	5495800000	JaBbA v1	0.38
0.95824	0.923456	0.279476	sim_336	5495640000	JaBbA v1	0.613136
0.995972	0.99844	0.0213216	sim_337	5500580000	JaBbA v1	1
0.937116	0.911217	0.218401	sim_338	5499680000	JaBbA v1	0.989764
0.998783	0.99871	0.0162232	sim_339	5495700000	JaBbA v1	0.653577
0.999938	0.99988	0.0110756	sim_34	5500420000	JaBbA v1	0.688112
0.998827	0.999011	0.0432686	sim_340	5500420000	JaBbA v1	1
0.902704	0.752354	0.676027	sim_341	5495660000	JaBbA v1	0.836994
1	1	2.6974e-07	sim_342	5499740000	JaBbA v1	0.717932
0.999424	0.9995	0.0190231	sim_343	5495740000	JaBbA v1	0.969352
0.999838	0.999673	0.00945178	sim_344	5500580000	JaBbA v1	0.660166
1	1	2.40367e-05	sim_345	5499960000	JaBbA v1	1
0.838315	0.861442	1.07194	sim_346	5499980000	JaBbA v1	0.373276
0.927788	0.879214	0.283671	sim_347	5493760000	JaBbA v1	0.786751
0.994269	0.998704	0.0882769	sim_348	5495740000	JaBbA v1	0.893937
0.999077	0.999465	0.0355769	sim_349	5499860000	JaBbA v1	0.795595
0.877767	0.827539	0.472633	sim_35	5500380000	JaBbA v1	0.191492
0.963581	0.975939	1.09759	sim_350	5496320000	JaBbA v1	0.779156
0.987643	0.97919	0.111203	sim_351	5495800000	JaBbA v1	0.693103
0.973527	0.947308	0.13648	sim_352	5499960000	JaBbA v1	0.575592
0.964356	0.960234	1.00639	sim_353	5496340000	JaBbA v1	0.9434
0.97337	0.960516	0.246774	sim_354	5495420000	JaBbA v1	1
0.998103	0.997354	0.0202832	sim_355	5500560000	JaBbA v1	1
0.943927	0.966468	1.01002	sim_356	5496300000	JaBbA v1	0.229286
0.999996	0.99998	0.000776675	sim_357	5500580000	JaBbA v1	0.959103
0.931492	0.902793	1.01062	sim_358	5496340000	JaBbA v1	0.275733
1	1	0.000167272	sim_359	5499960000	JaBbA v1	0.634337
0.997217	0.997347	0.0223634	sim_36	5496400000	JaBbA v1	0.677426
0.945041	0.93247	0.590118	sim_360	5495220000	JaBbA v1	0.543064
0.998547	0.999654	0.0475342	sim_361	5500240000	JaBbA v1	1
0.999999	0.999982	0.000983834	sim_362	5500580000	JaBbA v1	0.92076
0.258106	0.0182426	0.330908	sim_363	5495800000	JaBbA v1	0.225963
0.998719	0.999154	0.0310053	sim_364	5499640000	JaBbA v1	1
0.995462	0.999958	0.240865	sim_365	5495800000	JaBbA v1	0.729391
0.99871	0.999802	0.0508507	sim_366	5496440000	JaBbA v1	0.875355
0.999477	0.999346	0.0239343	sim_367	5500200000	JaBbA v1	0.928555
0.924023	0.889106	0.279766	sim_368	5499900000	JaBbA v1	0.80412
1	1	2.6972e-07	sim_369	5500580000	JaBbA v1	0.727682
0.959354	0.962621	0.518879	sim_37	5500360000	JaBbA v1	0.452925
0.403825	0.403815	0.27913	sim_370	5496420000	JaBbA v1	0.226751
0.999597	0.998474	0.0124131	sim_371	5495660000	JaBbA v1	0.741284
0.999772	0.999682	0.011213	sim_372	5499960000	JaBbA v1	0.622521
0.964441	0.94287	0.144635	sim_373	5499980000	JaBbA v1	1
0.466606	0.402252	0.726213	sim_374	5495440000	JaBbA v1	0.3
0.960971	0.956877	0.254358	sim_375	5495260000	JaBbA v1	0.949156
0.995393	0.997844	0.0299898	sim_376	5500480000	JaBbA v1	0.610147
0.999092	0.997932	0.0667421	sim_377	5496340000	JaBbA v1	0.989991
0.814807	0.636748	0.880171	sim_378	5495820000	JaBbA v1	0.318313
0.958954	0.9338	0.771254	sim_379	5495240000	JaBbA v1	0.540685
0.999251	0.999475	0.0232734	sim_38	5495740000	JaBbA v1	0.676738
0.866522	0.814211	0.621733	sim_380	5499780000	JaBbA v1	0.407444
0.849332	0.603896	0.264792	sim_381	5499960000	JaBbA v1	0.334534
0.990313	0.990393	0.183297	sim_382	5495240000	JaBbA v1	1
0.58292	0.606697	1.03711	sim_383	5496420000	JaBbA v1	0.206056
0.999616	0.999498	0.0107957	sim_384	5500580000	JaBbA v1	1
0.998638	0.998489	0.0205304	sim_385	5495700000	JaBbA v1	0.714667
0.999208	0.998772	0.0128728	sim_386	5495780000	JaBbA v1	0.742278
0.161607	0.101887	0.388172	sim_387	5500580000	JaBbA v1	0.274961
0.784237	0.594112	0.870244	sim_388	5500420000	JaBbA v1	0.265269
0.900459	0.900949	0.970613	sim_389	5495380000	JaBbA v1	0.28507
0.903008	0.862361	0.251997	sim_39	5499740000	JaBbA v1	0.482519
0.999633	0.999374	0.00988481	sim_390	5496280000	JaBbA v1	0.865282
0.944474	0.945541	0.229198	sim_391	5495680000	JaBbA v1	0.718025
0.999651	0.999766	0.025136	sim_392	5500520000	JaBbA v1	0.722832
0.999572	0.999662	0.0171755	sim_393	5495780000	JaBbA v1	0.681826
0.00942249	0.0106368	0.114284	sim_394	5495820000	JaBbA v1	0.41697
0.913844	0.909266	1.274	sim_395	5494280000	JaBbA v1	0.35
0.904341	0.851224	0.341869	sim_396	5495780000	JaBbA v1	0.641664
0.9296	0.890635	0.388416	sim_397	5495640000	JaBbA v1	0.430104
		0.0349053	sim_398	5500580000	JaBbA v1	0.796021
0.9964	0.999667	0.0866508	sim_399	5500280000	JaBbA v1	0.647736
0.995888	0.99874	0.0392626	sim_4	5496420000	JaBbA v1	0.564132
0.829393	0.732895	0.337671	sim_40	5499940000	JaBbA v1	0.78692
0.107448	0.109196	0.314681	sim_400	5499960000	JaBbA v1	0.862223
0.958039	0.936207	0.231017	sim_401	5495440000	JaBbA v1	0.924917
0.787852	0.826017	0.93247	sim_402	5500360000	JaBbA v1	0.413632
0.97728	0.971047	0.0887067	sim_403	5496280000	JaBbA v1	0.838234
0.874314	0.814471	0.444856	sim_404	5499980000	JaBbA v1	0.826076
0.99942	0.999524	0.0167233	sim_405	5495800000	JaBbA v1	1
0.973608	0.956597	0.229842	sim_406	5495240000	JaBbA v1	0.743091
0.779901	0.771665	0.249643	sim_407	5495700000	JaBbA v1	0.401019
0.999997	1	0.000677821	sim_408	5500580000	JaBbA v1	0.745554
0.999996	0.999942	0.00143534	sim_409	5496420000	JaBbA v1	1
0.902566	0.911216	1.25415	sim_41	5500000000	JaBbA v1	0.261594
0.812456	0.763394	0.179132	sim_410	5500580000	JaBbA v1	0.317948
0.99299	0.99516	0.143388	sim_411	5499700000	JaBbA v1	0.843489
0.925471	0.889443	0.283545	sim_412	5495620000	JaBbA v1	0.687048
0.99949	0.999608	0.0336417	sim_413	5500360000	JaBbA v1	0.865852
0.896242	0.821518	0.311483	sim_414	5499680000	JaBbA v1	0.377782
0.883184	0.883202	0.161062	sim_415	5495680000	JaBbA v1	0.65493
0.979761	0.96273	0.202015	sim_416	5495740000	JaBbA v1	0.968936
0.853897	0.907296	0.630999	sim_417	5495800000	JaBbA v1	0.458258
0.999804	0.999465	0.00701962	sim_418	5499960000	JaBbA v1	0.884539
0.999463	0.999088	0.0111078	sim_419	5500560000	JaBbA v1	0.960266
1	1	3.81451e-07	sim_42	5500580000	JaBbA v1	0.948935
0.890378	0.865138	0.438024	sim_420	5499920000	JaBbA v1	0.336706
0.998298	0.999615	0.0444322	sim_421	5500500000	JaBbA v1	0.826121
0.997619	0.999559	0.0356009	sim_422	5495720000	JaBbA v1	1
0.890481	0.888682	0.0158413	sim_423	5499980000	JaBbA v1	1
0.995725	0.990014	0.0626533	sim_424	5496340000	JaBbA v1	0.935687
1	1	2.69736e-07	sim_425	5499920000	JaBbA v1	0.885385
0.944711	0.951421	0.520334	sim_426	5494340000	JaBbA v1	0.786417
0.993433	0.993358	0.0132536	sim_427	5500480000	JaBbA v1	0.744315
0.910132	0.908172	0.0113756	sim_428	5500580000	JaBbA v1	0.897864
0.962533	0.942495	0.41616	sim_429	5495560000	JaBbA v1	0.641856
0.999533	0.999439	0.00596374	sim_43	5500580000	JaBbA v1	0.721808
0.980017	0.999997	0.0746685	sim_430	5500000000	JaBbA v1	0.611356
0.999466	0.999627	0.0237229	sim_431	5500580000	JaBbA v1	0.766062
0.657736	0.63829	0.6779	sim_432	5495700000	JaBbA v1	0.197344
0.997773	0.998454	0.026814	sim_433	5499880000	JaBbA v1	0.635996
0.932448	0.950708	0.402881	sim_434	5500480000	JaBbA v1	0.530374
0.998089	0.998258	0.0588352	sim_435	5496180000	JaBbA v1	0.949189
0.816477	0.773679	0.278293	sim_436	5495800000	JaBbA v1	0.567143
		0.0396571	sim_437	5500580000	JaBbA v1	0.268902
0.75763	0.745598	0.154852	sim_438	5499960000	JaBbA v1	0.867552
0.914696	0.965744	0.837505	sim_439	5499920000	JaBbA v1	0.552052
0.86989	0.863515	0.208122	sim_44	5499980000	JaBbA v1	0.889603
0.998662	0.999036	0.0570663	sim_440	5496240000	JaBbA v1	0.830902
0.947313	0.921313	0.231836	sim_441	5496320000	JaBbA v1	0.818271
0.886392	0.857245	0.242005	sim_442	5499960000	JaBbA v1	0.725204
0.540819	0.373425	0.53952	sim_443	5499840000	JaBbA v1	0.192515
0.999111	0.998807	0.0133795	sim_444	5495820000	JaBbA v1	0.817106
0.896352	0.900622	0.304734	sim_445	5495620000	JaBbA v1	1
0.900539	0.913011	0.247514	sim_446	5496600000	JaBbA v1	0.422425
0.990184	0.990166	0.0407142	sim_447	5495800000	JaBbA v1	0.823593
0.777778	0.752595	0.98481	sim_448	5500540000	JaBbA v1	0.744323
0.344592	0.347635	0.344331	sim_449	5500580000	JaBbA v1	0.389723
0.84	0.82544	0.248181	sim_45	5495800000	JaBbA v1	0.517582
0.968958	0.957325	0.235829	sim_450	5499480000	JaBbA v1	1
0.954219	0.915075	0.34382	sim_451	5499960000	JaBbA v1	0.385513
0.999049	0.999381	0.0404044	sim_452	5495780000	JaBbA v1	0.633354
0.944817	0.913953	0.231103	sim_453	5495740000	JaBbA v1	0.629795
0.871487	0.863049	1.00261	sim_454	5499760000	JaBbA v1	0.265704
0.990246	0.99496	0.156716	sim_455	5500480000	JaBbA v1	1
0.580202	0.518845	0.854608	sim_456	5495720000	JaBbA v1	0.83
0.957081	0.927046	0.233272	sim_457	5495720000	JaBbA v1	0.940748
0.973497	0.930443	0.228819	sim_458	5495540000	JaBbA v1	0.714633
0.720553	0.720566	0.194336	sim_459	5499980000	JaBbA v1	0.638617
0.99966	0.998986	0.0094388	sim_46	5500580000	JaBbA v1	0.861985
0.979684	0.988826	0.189262	sim_460	5496420000	JaBbA v1	0.592665
0.749683	0.646534	0.249147	sim_461	5500500000	JaBbA v1	1
0.381883	0.368829	1.07537	sim_462	5495820000	JaBbA v1	0.84806
0.789901	0.762965	1.09256	sim_463	5495420000	JaBbA v1	0.912713
0.776619	0.60476	1.08029	sim_464	5499800000	JaBbA v1	0.89344
0.896924	0.882295	1.08406	sim_465	5499660000	JaBbA v1	0.890469
0.998563	0.998853	0.0628376	sim_466	5495960000	JaBbA v1	0.781782
0.970083	0.934063	0.23764	sim_467	5499920000	JaBbA v1	0.887043
0.352365	0.269825	0.694453	sim_468	5496420000	JaBbA v1	0.427608
0.999678	0.999449	0.00971626	sim_469	5495420000	JaBbA v1	0.863679
0.816268	0.639527	0.834093	sim_47	5495800000	JaBbA v1	0.363221
1	1	1.97645e-07	sim_470	5495700000	JaBbA v1	0.673408
0.954844	0.986515	0.320148	sim_471	5500580000	JaBbA v1	0.540079
0.985804	0.982792	0.103885	sim_472	5495720000	JaBbA v1	1
0.909658	0.859052	0.789842	sim_473	5499640000	JaBbA v1	0.327754
-0.000480243	-0.000529402	0.123569	sim_474	5499860000	JaBbA v1	0.223459
1	1	1.90721e-07	sim_475	5500580000	JaBbA v1	0.814209
0.999481	0.999505	0.040194	sim_476	5495780000	JaBbA v1	0.874726
0.978252	0.951215	0.418877	sim_477	5495340000	JaBbA v1	0.698743
0.96272	0.93764	0.131145	sim_478	5495800000	JaBbA v1	0.760167
0.883558	0.8886	1.1312	sim_479	5499480000	JaBbA v1	0.67
0.9999	0.999792	0.00996929	sim_48	5500320000	JaBbA v1	0.699813
0.937511	0.875094	2.15571	sim_480	5500360000	JaBbA v1	0.447337
0.968073	0.954347	0.419779	sim_481	5499620000	JaBbA v1	0.46334
0.966094	0.931742	0.268211	sim_482	5499800000	JaBbA v1	0.563594
0.904016	0.873448	0.26846	sim_483	5499820000	JaBbA v1	0.892015
0.763014	0.681153	0.775292	sim_484	5495820000	JaBbA v1	0.389492
0.993203	0.984415	0.116128	sim_485	5495540000	JaBbA v1	0.989782
0.643427	0.588631	0.757446	sim_486	5495760000	JaBbA v1	0.416898
0.995439	0.996596	0.0664829	sim_487	5495780000	JaBbA v1	1
0.99951	0.999606	0.0233313	sim_488	5499740000	JaBbA v1	0.609243
0.627962	0.575428	0.864005	sim_489	5495820000	JaBbA v1	0.23822
0.979249	0.966955	0.240127	sim_49	5499800000	JaBbA v1	0.767859
0.00336371	0.00759476	1.12999	sim_490	5499980000	JaBbA v1	0.322311
0.846929	0.709094	1.0788	sim_491	5497520000	JaBbA v1	0.633081
0.998783	0.998597	0.0163884	sim_492	5496340000	JaBbA v1	0.77535
0.907928	0.911783	0.662088	sim_493	5499680000	JaBbA v1	0.516871
0.906942	0.854135	0.22986	sim_494	5495240000	JaBbA v1	0.69459
0.924642	0.788948	0.292897	sim_495	5495800000	JaBbA v1	0.405209
0.934761	0.875429	0.31387	sim_496	5495720000	JaBbA v1	0.52926
0.935782	0.869141	0.461043	sim_497	5499820000	JaBbA v1	0.41
0.780244	0.673502	0.763906	sim_498	5500540000	JaBbA v1	0.276281
0.999936	0.999963	0.00792721	sim_499	5500560000	JaBbA v1	0.766823
0.701602	0.639026	0.548842	sim_5	5495820000	JaBbA v1	0.292948
		0.00421688	sim_50	5499880000	JaBbA v1	0.763648
0.896979	0.892803	0.0177437	sim_500	5500580000	JaBbA v1	0.896056
0.947422	0.939141	0.236445	sim_51	5495760000	JaBbA v1	0.927638
0.928945	0.991476	0.954921	sim_52	5495800000	JaBbA v1	0.416136
0.998478	0.998432	0.0208875	sim_53	5496200000	JaBbA v1	0.69
0.271016	0.272569	0.0827368	sim_54	5499980000	JaBbA v1	0.504846
0.770579	0.719199	0.971143	sim_55	5500580000	JaBbA v1	0.12
-0.0011564	-0.00118058	0.118599	sim_56	5495800000	JaBbA v1	0.367913
0.166353	0.121545	0.658439	sim_57	5499840000	JaBbA v1	0.279907
0.809072	0.570402	0.669127	sim_58	5496420000	JaBbA v1	0.339236
0.998685	0.999218	0.0372433	sim_59	5500540000	JaBbA v1	0.919026
0.981608	0.963783	0.147058	sim_6	5499640000	JaBbA v1	0.801615
0.999123	0.998209	0.0247281	sim_60	5495800000	JaBbA v1	0.91783
0.989678	0.998562	0.135795	sim_61	5500440000	JaBbA v1	0.627691
0.815348	0.760713	0.841597	sim_62	5495820000	JaBbA v1	0.329397
0.999516	0.998182	0.0125514	sim_63	5495820000	JaBbA v1	0.746104
0.985387	0.955676	0.272372	sim_64	5495620000	JaBbA v1	0.724349
0.948875	0.967769	0.310182	sim_65	5495520000	JaBbA v1	0.653693
0.998894	0.997703	0.0347566	sim_66	5500580000	JaBbA v1	1
0.998213	0.999931	0.00963935	sim_67	5499980000	JaBbA v1	1
0.510509	0.705729	1.21213	sim_68	5496940000	JaBbA v1	0.515443
0.87718	0.578283	1.07781	sim_69	5495800000	JaBbA v1	0.934751
0.936289	0.920749	0.300294	sim_7	5495680000	JaBbA v1	0.754866
0.907787	0.87143	1.04886	sim_70	5495300000	JaBbA v1	0.348559
0.947938	0.916327	0.142982	sim_71	5500580000	JaBbA v1	0.389035
0.997556	0.994991	0.0332676	sim_72	5495700000	JaBbA v1	0.635623
0.998681	0.99826	0.0172633	sim_73	5495700000	JaBbA v1	0.621706
0.998953	0.99917	0.041407	sim_74	5498160000	JaBbA v1	0.683652
0.997212	0.998523	0.0868445	sim_75	5497360000	JaBbA v1	1
0.99874	0.998622	0.00771846	sim_76	5495700000	JaBbA v1	0.694886
0.949987	0.862864	0.349275	sim_77	5499860000	JaBbA v1	0.417966
0.932042	0.915562	0.849512	sim_78	5495720000	JaBbA v1	0.345368
0.914428	0.919549	0.379533	sim_79	5499940000	JaBbA v1	0.808894
0.93426	0.906346	1.07754	sim_8	5498160000	JaBbA v1	0.802454
-4.93231e-05	-5.19801e-05	1.00002	sim_80	5495800000	JaBbA v1	0.437851
0.874873	0.879364	1.07526	sim_81	5499600000	JaBbA v1	0.640787
0.839201	0.839257	0.162878	sim_82	5499820000	JaBbA v1	0.692884
0.969472	0.969447	0.0623225	sim_83	5499840000	JaBbA v1	0.544421
0.999415	0.999345	0.0259843	sim_84	5500580000	JaBbA v1	0.9694
0.947466	0.878329	0.31687	sim_85	5495720000	JaBbA v1	0.76663
0.964484	0.953731	0.175444	sim_86	5495780000	JaBbA v1	0.938751
0.999999	0.999981	0.000415133	sim_87	5500580000	JaBbA v1	0.826133
0.839075	0.973059	0.639265	sim_88	5495760000	JaBbA v1	0.967223
0.983905	0.981596	0.0850163	sim_89	5496400000	JaBbA v1	0.791668
0.999809	0.999692	0.0120357	sim_9	5495800000	JaBbA v1	0.784922
0.849633	0.867511	0.17877	sim_90	5495800000	JaBbA v1	0.402183
0.905699	0.932828	0.403715	sim_91	5497020000	JaBbA v1	0.444439
0.98929	0.999649	0.167863	sim_92	5500400000	JaBbA v1	0.590287
0.993276	0.999999	0.072716	sim_93	5500580000	JaBbA v1	0.617735
0.996323	0.999704	0.0691148	sim_94	5500480000	JaBbA v1	0.58003
0.930366	0.876987	0.328656	sim_95	5500460000	JaBbA v1	0.509099
0.98347	0.987338	0.595687	sim_96	5499960000	JaBbA v1	0.488378
0.971996	0.97066	0.306138	sim_97	5495520000	JaBbA v1	0.76516
0.864716	0.855552	0.242306	sim_98	5500580000	JaBbA v1	0.397565
0.953581	0.895821	0.232194	sim_99	5495820000	JaBbA v1	0.700552
0.962421	0.946861	0.25648	sim_1	5499780000	ASCAT	1
0.880467	0.988097	1.08711	sim_10	5500520000	ASCAT	0.604324
0.421441	0.613777	0.488789	sim_100	5500560000	ASCAT	0.826476
0.928508	0.854662	0.512022	sim_101	5498940000	ASCAT	0.878798
0.899985	0.863375	0.234062	sim_102	5500580000	ASCAT	0.615282
0.610744	0.757407	0.68324	sim_103	5500520000	ASCAT	0.98101
0.78926	0.773587	0.38799	sim_104	5495800000	ASCAT	0.66477
0.846989	0.820432	0.222539	sim_105	5500580000	ASCAT	0.860313
0.712851	0.717675	1.00095	sim_106	5500520000	ASCAT	0.223827
0.263687	0.637388	0.691724	sim_107	5496940000	ASCAT	0.796065
0.918443	0.887534	0.0313111	sim_108	5498820000	ASCAT	0.744101
0.748584	0.715005	0.616735	sim_109	5495800000	ASCAT	0.889151
0.264943	0.636645	0.685151	sim_11	5500520000	ASCAT	0.729402
0.902799	0.898041	0.2669	sim_110	5500560000	ASCAT	1
0.880364	0.812681	0.274836	sim_111	5500580000	ASCAT	0.582241
0.902805	0.850248	0.239351	sim_112	5500580000	ASCAT	0.838275
0.653824	0.653829	0.233971	sim_113	5500580000	ASCAT	0.612104
0.681982	0.673821	0.561588	sim_114	5500580000	ASCAT	0.437141
0.987366	0.99532	0.161068	sim_115	5500580000	ASCAT	0.86
0.609788	0.607692	0.55225	sim_116	5500580000	ASCAT	0.564662
0.595554	0.598822	0.315024	sim_117	5500580000	ASCAT	0.55466
0.481403	0.661689	0.957666	sim_118	5500500000	ASCAT	0.54599
0.961885	0.959246	0.166641	sim_119	5500480000	ASCAT	1
0.748104	0.595021	0.233925	sim_12	5500580000	ASCAT	0.700761
0.769921	0.779731	0.238856	sim_120	5499840000	ASCAT	0.917769
0.567301	0.565595	0.546804	sim_121	5500580000	ASCAT	0.329325
0.710844	0.656533	0.24617	sim_122	5500580000	ASCAT	1
0.602415	0.952793	1.31404	sim_123	5486040000	ASCAT	1
0.915604	0.891158	0.330509	sim_124	5496940000	ASCAT	0.625519
0.688529	0.680154	0.483617	sim_125	5500520000	ASCAT	0.272669
0.824736	0.842067	0.714427	sim_127	5500520000	ASCAT	0.786554
0.461523	0.487384	0.579251	sim_128	5500420000	ASCAT	0.29
0.974851	0.986203	0.343271	sim_129	5500580000	ASCAT	0.909245
0.329967	0.397477	1.48722	sim_13	5500580000	ASCAT	0.14
0.222777	0.483455	0.714782	sim_130	5500580000	ASCAT	0.989529
0.925925	0.9096	0.240012	sim_131	5500560000	ASCAT	0.737661
0.791747	0.821589	0.922877	sim_132	5500580000	ASCAT	0.733376
0.590998	0.625366	1.35025	sim_133	5500580000	ASCAT	0.14
0.3919	0.305838	0.971127	sim_134	5500580000	ASCAT	0.826404
0.994392	0.994078	0.0836182	sim_135	5500580000	ASCAT	0.682461
0.72474	0.776166	0.70912	sim_136	5500580000	ASCAT	0.746479
0.663637	0.882326	1.10589	sim_137	5500580000	ASCAT	0.651578
0.866347	0.88067	0.516297	sim_138	5500580000	ASCAT	0.917389
0.888784	0.878484	0.365916	sim_139	5495800000	ASCAT	0.793126
0.847146	0.846774	0.233773	sim_14	5500560000	ASCAT	0.760885
0.897889	0.844783	0.240904	sim_140	5500580000	ASCAT	0.844597
0.104277	0.106351	0.235231	sim_141	5500580000	ASCAT	0.710192
0.663824	0.641106	0.646035	sim_142	5500580000	ASCAT	0.393888
0.898496	0.835113	0.474819	sim_143	5500580000	ASCAT	0.86
0.946424	0.976805	0.588264	sim_144	5500580000	ASCAT	0.979862
0.94445	0.713573	0.190836	sim_146	5500580000	ASCAT	0.936464
0.640782	0.800902	0.985295	sim_147	5500520000	ASCAT	0.657429
0.951046	0.943898	0.488093	sim_148	5499580000	ASCAT	1
0.164656	0.547317	0.926631	sim_149	5495800000	ASCAT	0.245767
0.362549	0.29518	0.970629	sim_15	5500580000	ASCAT	0.20388
		0.995835	sim_150	5500520000	ASCAT	0.937374
0.582782	0.583345	0.22983	sim_151	5496940000	ASCAT	0.82536
0.989363	0.989982	0.0453138	sim_152	5500520000	ASCAT	1
0.237426	0.40711	1.1172	sim_153	5496860000	ASCAT	0.492672
0.222078	0.436545	0.702387	sim_154	5500580000	ASCAT	0.919295
0.427982	0.543904	1.77436	sim_155	5500580000	ASCAT	0.266097
0.914064	0.872404	0.221548	sim_156	5500520000	ASCAT	0.519862
0.663002	0.973665	1.07342	sim_157	5499780000	ASCAT	0.791034
0.868026	0.866316	0.278578	sim_158	5388060000	ASCAT	1
-0.015924	-0.0861175	0.830166	sim_159	5500580000	ASCAT	0.1
0.902803	0.883147	0.528045	sim_16	5500580000	ASCAT	0.919395
0.604334	0.57094	0.692313	sim_160	5500560000	ASCAT	0.339131
0.499604	0.502351	0.232496	sim_161	5500580000	ASCAT	0.828309
0.690833	0.776469	0.30113	sim_162	5500500000	ASCAT	0.881212
0.545086	0.546625	0.361391	sim_163	5500580000	ASCAT	0.372431
0.811136	0.812799	0.233228	sim_164	5499840000	ASCAT	0.761675
0.929014	0.890632	0.163719	sim_165	5500580000	ASCAT	0.948585
0.545346	0.497809	0.826289	sim_166	5500580000	ASCAT	0.375182
0.962325	0.960226	0.204424	sim_167	5496940000	ASCAT	1
0.768428	0.696146	0.489874	sim_168	5500520000	ASCAT	0.473909
0.857382	0.77208	0.232609	sim_169	5500580000	ASCAT	0.922356
0.916815	0.893449	0.235783	sim_17	5500580000	ASCAT	0.739469
0.433008	0.456374	0.408961	sim_170	5500580000	ASCAT	0.209723
0.993197	0.99804	0.088262	sim_171	5496940000	ASCAT	0.971931
0.786747	0.708725	0.360966	sim_172	5500580000	ASCAT	0.483497
0.630698	0.580775	0.754975	sim_173	5500580000	ASCAT	0.491577
0.929685	0.907253	0.69085	sim_174	5499960000	ASCAT	0.48032
0.560138	0.479366	0.687015	sim_175	5500580000	ASCAT	0.90276
0.67187	0.918973	0.963041	sim_176	5500520000	ASCAT	0.719924
0.73835	0.885891	0.547801	sim_177	5500520000	ASCAT	0.979786
0.212634	0.740459	1.36161	sim_178	5496920000	ASCAT	0.830074
-0.000209961	-0.000573536	1.0094	sim_179	5500520000	ASCAT	0.231211
0.0618315	0.0627833	0.232074	sim_18	5500580000	ASCAT	0.581804
0.901747	0.873404	0.233388	sim_180	5500580000	ASCAT	0.849926
0.0960107	0.270086	0.682499	sim_181	5495800000	ASCAT	0.887861
0.208613	0.209718	0.232772	sim_182	5500580000	ASCAT	0.990056
0.535823	0.682005	1.30249	sim_183	5500580000	ASCAT	0.435889
0.845196	0.844858	0.235869	sim_184	5500500000	ASCAT	0.566711
0.78155	0.697551	0.519316	sim_185	5500580000	ASCAT	0.683831
0.950208	0.924634	0.241855	sim_186	5500580000	ASCAT	1
0.647775	0.593432	0.40459	sim_187	5500580000	ASCAT	0.539731
0.475764	0.746528	1.12028	sim_188	5497040000	ASCAT	0.799994
0.476611	0.604789	0.709922	sim_189	5500580000	ASCAT	0.612407
0.620355	0.584928	0.910046	sim_19	5500580000	ASCAT	0.287477
0.822496	0.881301	0.61031	sim_190	5500580000	ASCAT	0.526432
0.659613	0.8741	0.634115	sim_191	5500580000	ASCAT	0.89869
0.786012	0.711795	0.253868	sim_192	5500580000	ASCAT	1
0.844023	0.80484	1.28476	sim_193	5500580000	ASCAT	0.791998
0.362537	0.573629	0.483824	sim_194	5500580000	ASCAT	1
0.248381	0.205009	0.793247	sim_195	5500580000	ASCAT	0.449256
0.897698	0.911969	0.231148	sim_196	5500560000	ASCAT	0.824689
0.343931	0.285562	0.814722	sim_197	5500580000	ASCAT	0.627567
0.231504	0.558994	0.700591	sim_198	5500560000	ASCAT	0.959985
0.620934	0.529568	0.256308	sim_199	5497840000	ASCAT	0.659281
-0.0138028	-0.0138924	1.07938	sim_2	5500520000	ASCAT	0.754893
0.848355	0.804357	0.646241	sim_20	5500580000	ASCAT	0.495866
0.991054	0.991545	0.0535707	sim_200	5500500000	ASCAT	1
0.941589	0.952443	0.216793	sim_202	5500500000	ASCAT	0.835882
0.950237	0.944423	0.362135	sim_203	5500580000	ASCAT	0.725093
0.889531	0.993287	0.280342	sim_204	5498360000	ASCAT	0.862489
0.776144	0.792776	1.09549	sim_205	5496940000	ASCAT	0.273873
0.44715	0.452984	0.410977	sim_206	5495800000	ASCAT	0.496586
0.8758	0.843534	0.421989	sim_207	5500580000	ASCAT	0.584756
0.821597	0.776191	0.427562	sim_208	5500580000	ASCAT	0.767613
0.885655	0.86501	0.741928	sim_209	5500580000	ASCAT	0.513774
0.283969	0.651306	1.31776	sim_21	5495800000	ASCAT	0.859921
0.961051	0.949209	0.331099	sim_210	5500580000	ASCAT	0.900874
0.411582	0.414274	0.44589	sim_211	5500580000	ASCAT	0.599189
0.967086	0.966144	0.0792722	sim_212	5500500000	ASCAT	0.886321
0.88803	0.890961	0.128421	sim_213	5500520000	ASCAT	0.427792
0.921301	0.920053	0.343012	sim_214	5470460000	ASCAT	1
0.863492	0.720679	0.699653	sim_215	5500580000	ASCAT	0.354162
0.819742	0.859095	0.470819	sim_216	5498240000	ASCAT	0.927257
0.000786808	0.0484495	1.2378	sim_217	5500580000	ASCAT	0.258944
0.95083	0.934329	0.252632	sim_218	5500580000	ASCAT	0.87356
0.013679	0.0433969	0.684937	sim_219	5500520000	ASCAT	0.353073
0.492619	0.521448	0.62489	sim_22	5500580000	ASCAT	0.303329
0.683806	0.685402	0.244273	sim_220	5500580000	ASCAT	0.848152
0.974368	0.980474	0.24111	sim_221	5480160000	ASCAT	1
0.23853	0.561912	1.57052	sim_222	5500520000	ASCAT	0.312302
0.66341	0.63417	0.593704	sim_223	5500580000	ASCAT	0.583136
0.385002	0.365466	0.232354	sim_224	5500580000	ASCAT	0.70125
0.954327	0.944087	0.270828	sim_225	5500580000	ASCAT	0.624092
0.490021	0.757671	0.688143	sim_226	5500500000	ASCAT	1
0.974075	0.949932	0.246141	sim_227	5500580000	ASCAT	0.790102
0.873019	0.829116	0.451921	sim_228	5500580000	ASCAT	0.624974
0.0378596	0.120384	0.684912	sim_229	5500520000	ASCAT	0.377983
0.917552	0.876694	0.233713	sim_23	5500580000	ASCAT	1
0.969473	0.965726	0.315867	sim_230	5500580000	ASCAT	0.71236
0.979621	0.982706	0.175058	sim_231	5500580000	ASCAT	0.858288
0.947855	0.847288	0.236915	sim_232	5500580000	ASCAT	0.843926
0.659524	0.628851	1.11092	sim_233	5497340000	ASCAT	0.254355
0.734191	0.670589	0.753377	sim_235	5495800000	ASCAT	0.549273
0.555648	0.804397	0.928025	sim_236	5500580000	ASCAT	0.780694
0.75039	0.669713	1.00212	sim_237	5500580000	ASCAT	0.549443
0.480354	0.746193	1.44321	sim_238	5500580000	ASCAT	0.614705
0.0764736	0.0856155	0.947422	sim_239	5495800000	ASCAT	0.210031
0.968493	0.933977	0.296138	sim_24	5500580000	ASCAT	0.690937
0.931382	0.891775	0.231747	sim_240	5500560000	ASCAT	1
0.749695	0.976439	0.734069	sim_241	5495780000	ASCAT	0.781936
		0.231375	sim_242	5500580000	ASCAT	0.66
0.733999	0.985416	0.661719	sim_243	5500580000	ASCAT	0.94
0.520147	0.328961	0.65282	sim_244	5500580000	ASCAT	0.288315
0.478923	0.501788	1.03799	sim_245	5500520000	ASCAT	0.249986
0.522271	0.675109	0.793632	sim_246	5500580000	ASCAT	0.580086
0.887127	0.845315	0.736521	sim_247	5500560000	ASCAT	0.571544
0.534349	0.751143	0.693155	sim_248	5496940000	ASCAT	0.952804
0.516107	0.467938	0.743546	sim_249	5500500000	ASCAT	0.275604
0.709986	0.764113	0.924476	sim_25	5495780000	ASCAT	0.8289
0.595281	0.806673	0.0658082	sim_250	5500520000	ASCAT	0.675066
0.848334	0.792306	0.754339	sim_251	5500580000	ASCAT	0.509227
		0.715308	sim_252	5500580000	ASCAT	1
0.388773	0.445661	2.98671	sim_253	5495800000	ASCAT	0.948937
0.485674	0.785781	1.32789	sim_254	5500520000	ASCAT	0.898025
0.614467	0.613799	0.268445	sim_255	5500580000	ASCAT	0.304968
0.56514	0.645894	1.20164	sim_256	5500580000	ASCAT	0.260199
0.752178	0.687092	0.391642	sim_257	5500580000	ASCAT	0.453659
0.994958	0.997128	0.0719957	sim_258	5500500000	ASCAT	0.748709
0.0118328	0.111555	1.27116	sim_259	5500520000	ASCAT	0.649652
0.888006	0.824214	0.633323	sim_26	5498060000	ASCAT	0.507385
0.965423	0.986224	0.2536	sim_260	5500520000	ASCAT	0.819398
0.692219	0.65857	0.995219	sim_261	5500580000	ASCAT	0.462346
0.927909	0.809022	1.00399	sim_262	5496940000	ASCAT	0.967254
0.43157	0.658976	0.469882	sim_263	5500580000	ASCAT	0.66114
0.840696	0.833919	0.411734	sim_264	5500580000	ASCAT	0.752983
0.312576	0.375496	0.957849	sim_266	5500580000	ASCAT	0.77652
0.932032	0.880135	0.491677	sim_267	5500580000	ASCAT	0.697544
0.900032	0.885923	0.286595	sim_268	5500560000	ASCAT	0.950863
0.785246	0.888398	0.459916	sim_269	5495780000	ASCAT	0.916572
0.837477	0.78625	0.456092	sim_27	5500520000	ASCAT	0.541571
0.789071	0.599557	0.360403	sim_270	5496940000	ASCAT	0.486144
0.980993	0.929034	0.291436	sim_271	5500580000	ASCAT	0.74581
0.782477	0.946138	1.02066	sim_272	5500580000	ASCAT	1
0.584837	0.737457	0.468916	sim_273	5500580000	ASCAT	0.907184
0.77881	0.719304	0.532113	sim_274	5500580000	ASCAT	0.515997
0.571125	0.522439	1.15725	sim_275	5500560000	ASCAT	0.868753
0.652419	0.696873	0.669398	sim_276	5500580000	ASCAT	0.523134
0.394906	0.781109	1.51629	sim_277	5500580000	ASCAT	0.544336
0.445892	0.729617	0.687336	sim_278	5497620000	ASCAT	0.989865
0.988835	0.991206	0.0746316	sim_279	5500480000	ASCAT	0.777255
0.550748	0.550658	0.271383	sim_28	5500580000	ASCAT	0.353897
0.393153	0.34554	2.45366	sim_280	5500560000	ASCAT	0.786041
0.543653	0.543561	0.301945	sim_281	5500580000	ASCAT	1
0.407733	0.649836	0.968863	sim_282	5500520000	ASCAT	0.300182
0.428732	0.414494	0.541749	sim_283	5498060000	ASCAT	0.280643
0.88467	0.871748	0.408432	sim_284	5500560000	ASCAT	0.854194
0.585891	0.555757	0.402574	sim_285	5500560000	ASCAT	0.557121
0.68071	0.641602	0.586284	sim_286	5500560000	ASCAT	0.924617
0.565381	0.72489	1.69396	sim_287	5500520000	ASCAT	0.298503
0.933221	0.931859	1.79002	sim_288	5500540000	ASCAT	0.952423
0.150043	0.275901	1.12867	sim_289	5500580000	ASCAT	0.505645
0.526031	0.54274	0.332874	sim_29	5500560000	ASCAT	0.303491
0.662816	0.590752	0.806768	sim_290	5495800000	ASCAT	0.463721
0.326941	0.330404	0.614546	sim_291	5500580000	ASCAT	0.46917
0.0474319	0.138117	0.698857	sim_292	5500580000	ASCAT	0.789134
0.486996	0.498457	1.00114	sim_293	5500580000	ASCAT	0.520887
0.822733	0.855205	0.46598	sim_294	5500580000	ASCAT	0.873565
0.376602	0.645058	2.209	sim_295	5500500000	ASCAT	0.677175
0.470094	0.436808	0.852148	sim_296	5500580000	ASCAT	0.468841
0.876304	0.813493	0.236055	sim_297	5500580000	ASCAT	0.79
0.751154	0.679638	0.602794	sim_299	5500580000	ASCAT	0.5237
0.939323	0.933814	0.143219	sim_3	5500580000	ASCAT	0.969348
0.322939	0.250137	0.937212	sim_30	5500580000	ASCAT	0.16
0.369499	0.69388	1.41521	sim_300	5498820000	ASCAT	0.518671
0.991166	0.989622	0.298128	sim_301	5494040000	ASCAT	1
0.921639	0.894036	0.252837	sim_302	5500580000	ASCAT	0.918372
0.528437	0.547598	0.82173	sim_303	5500580000	ASCAT	0.462689
0.885841	0.824753	0.312551	sim_304	5500580000	ASCAT	0.621918
0.839221	0.840514	0.237615	sim_305	5500580000	ASCAT	0.710255
0.727829	0.732854	0.31563	sim_307	5500580000	ASCAT	0.608756
0.965232	0.931379	0.237235	sim_308	5500580000	ASCAT	1
0.97352	0.959294	0.237925	sim_309	5500580000	ASCAT	0.958941
0.97656	0.950478	0.286774	sim_31	5500580000	ASCAT	0.896305
0.318282	0.320612	0.390656	sim_311	5495800000	ASCAT	0.333847
0.6239	0.857809	1.46785	sim_312	5499880000	ASCAT	0.793784
0.769798	0.774915	0.236766	sim_313	5500580000	ASCAT	0.944593
0.862381	0.789014	0.338732	sim_314	5496940000	ASCAT	0.746882
0.598512	0.546074	1.24388	sim_315	5500560000	ASCAT	0.11
0.95813	0.997279	0.515683	sim_316	5500580000	ASCAT	0.789506
0.55456	0.624953	0.785122	sim_318	5500580000	ASCAT	0.31714
-0.0110103	0.0165695	1.41344	sim_319	5500580000	ASCAT	0.498444
0.765322	0.76495	0.231095	sim_320	5500580000	ASCAT	0.86872
0.302589	0.326745	0.754816	sim_321	5500580000	ASCAT	0.240015
0.978039	0.976658	0.039046	sim_322	5500520000	ASCAT	0.927771
0.925604	0.878212	0.231616	sim_323	5500580000	ASCAT	1
0.933973	0.922711	0.19033	sim_324	5500560000	ASCAT	0.668238
0.922502	0.938915	0.305539	sim_325	5500580000	ASCAT	1
0.385695	0.36594	0.751511	sim_326	5500580000	ASCAT	0.318056
0.283026	0.500394	0.779921	sim_327	5495800000	ASCAT	0.643557
0.765615	0.724999	0.340959	sim_328	5500540000	ASCAT	0.457494
0.822763	0.799199	0.247556	sim_329	5500580000	ASCAT	0.782708
0.946655	0.918715	0.233569	sim_33	5473540000	ASCAT	1
0.737829	0.838296	0.895314	sim_330	5500520000	ASCAT	1
0.909812	0.832506	0.647473	sim_331	5500580000	ASCAT	0.917513
0.936143	0.930636	0.245105	sim_332	5500580000	ASCAT	0.714814
0.274167	0.309371	0.758964	sim_333	5500580000	ASCAT	0.269886
0.18174	0.167188	0.711046	sim_334	5500580000	ASCAT	0.333647
0.732642	0.679025	0.741338	sim_336	5495800000	ASCAT	0.613136
0.220228	0.353204	1.01971	sim_337	5500580000	ASCAT	1
0.928014	0.894956	0.227203	sim_338	5500580000	ASCAT	0.989764
0.803029	0.796949	0.236645	sim_339	5500580000	ASCAT	0.653577
0.965598	0.932031	0.266484	sim_34	5500580000	ASCAT	0.688112
0.946501	0.993259	0.233403	sim_341	5500580000	ASCAT	0.836994
-0.00104151	-0.00119677	0.230696	sim_342	5500580000	ASCAT	0.717932
0.74105	0.99024	0.490612	sim_343	5500580000	ASCAT	0.969352
0.615338	0.732726	0.633184	sim_344	5500520000	ASCAT	0.660166
0.807306	0.808165	0.263667	sim_345	5500580000	ASCAT	1
0.89711	0.902086	0.33996	sim_347	5500580000	ASCAT	0.786751
0.963765	0.925044	0.232609	sim_348	5500580000	ASCAT	0.893937
0.93588	0.919604	0.292793	sim_349	5500580000	ASCAT	0.795595
0.09878	0.292796	1.10157	sim_35	5500580000	ASCAT	0.191492
0.675723	0.73519	1.22573	sim_350	5500580000	ASCAT	0.779156
0.656188	0.919018	0.765016	sim_351	5500580000	ASCAT	0.693103
0.869871	0.766051	0.318665	sim_352	5497460000	ASCAT	0.575592
0.247885	0.763987	1.72178	sim_353	5498800000	ASCAT	0.9434
0.920184	0.935855	0.434986	sim_354	5485780000	ASCAT	1
0.197356	0.714659	1.36979	sim_355	5500520000	ASCAT	1
0.304612	0.281862	0.931829	sim_356	5500560000	ASCAT	0.229286
0.323417	0.690808	0.691283	sim_357	5500580000	ASCAT	0.959103
0.653478	0.61892	0.713423	sim_358	5500580000	ASCAT	0.275733
0.73589	0.735556	0.269215	sim_359	5500580000	ASCAT	0.634337
0.140307	0.658182	1.60726	sim_36	5499840000	ASCAT	0.677426
0.933606	0.909074	0.499202	sim_360	5498000000	ASCAT	0.543064
0.611617	0.829818	1.01681	sim_361	5500500000	ASCAT	1
0.642941	0.784302	0.684758	sim_362	5500580000	ASCAT	0.92076
0.537963	0.513912	0.390555	sim_363	5500580000	ASCAT	0.225963
0.970967	0.997229	0.150286	sim_364	5498800000	ASCAT	1
0.901086	0.620085	0.494373	sim_365	5500580000	ASCAT	0.729391
0.76877	0.942095	0.862611	sim_366	5500580000	ASCAT	0.875355
0.79954	0.780134	0.506488	sim_367	5500580000	ASCAT	0.928555
0.980314	0.97398	0.13625	sim_368	5500500000	ASCAT	0.80412
0.43061	0.433927	0.250136	sim_369	5500580000	ASCAT	0.727682
0.387897	0.802872	1.73237	sim_37	5500520000	ASCAT	0.452925
0.908513	0.927528	0.139585	sim_370	5498060000	ASCAT	0.226751
0.985528	0.984642	0.074066	sim_371	5500580000	ASCAT	0.741284
0.888473	0.820857	0.267821	sim_372	5500580000	ASCAT	0.622521
0.91978	0.883228	0.221427	sim_373	5500580000	ASCAT	1
0.340951	0.469556	1.02132	sim_374	5500580000	ASCAT	0.3
0.895564	0.898512	0.42112	sim_375	5500580000	ASCAT	0.949156
0.784993	0.782259	0.237906	sim_376	5500580000	ASCAT	0.610147
0.924974	0.894294	0.611595	sim_377	5499880000	ASCAT	0.989991
0.613332	0.517949	0.796835	sim_378	5500520000	ASCAT	0.318313
0.901515	0.850185	0.738372	sim_379	5500560000	ASCAT	0.540685
0.973745	0.994155	0.139708	sim_38	5500520000	ASCAT	0.676738
0.149121	0.464567	1.35848	sim_380	5500580000	ASCAT	0.407444
0.843135	0.799151	0.25177	sim_381	5500520000	ASCAT	0.334534
0.97501	0.971016	0.293808	sim_382	5491300000	ASCAT	1
0.144635	0.325326	1.52537	sim_383	5495800000	ASCAT	0.206056
0.444422	0.766102	0.684949	sim_384	5500520000	ASCAT	1
0.853807	0.815621	0.233175	sim_385	5500580000	ASCAT	0.714667
0.990187	0.988005	0.0455887	sim_386	5500520000	ASCAT	0.742278
0.245746	0.520212	0.98066	sim_387	5500520000	ASCAT	0.274961
0.505665	0.432148	1.12259	sim_388	5500580000	ASCAT	0.265269
0.769494	0.713222	1.20909	sim_389	5500580000	ASCAT	0.28507
0.652096	0.69701	0.503088	sim_39	5500560000	ASCAT	0.482519
0.414135	0.692523	0.684424	sim_390	5496920000	ASCAT	0.865282
0.881997	0.905566	0.325172	sim_391	5496940000	ASCAT	0.718025
0.923541	0.931284	0.388825	sim_392	5496940000	ASCAT	0.722832
0.889908	0.812112	0.297187	sim_393	5500580000	ASCAT	0.681826
0.235116	0.386579	1.17054	sim_394	5500580000	ASCAT	0.41697
0.674562	0.484329	1.08665	sim_395	5500580000	ASCAT	0.35
0.953826	0.937415	0.224335	sim_396	5500580000	ASCAT	0.641664
0.513991	0.594826	0.669528	sim_397	5500580000	ASCAT	0.430104
0.633568	0.792766	0.938769	sim_399	5500580000	ASCAT	0.647736
0.712142	0.655252	0.376581	sim_4	5498240000	ASCAT	0.564132
0.858502	0.796799	0.247533	sim_40	5500580000	ASCAT	0.78692
0.573197	0.60224	0.221102	sim_400	5500520000	ASCAT	0.862223
0.790819	0.814992	0.494142	sim_401	5500580000	ASCAT	0.924917
0.416123	0.429351	1.00439	sim_402	5500520000	ASCAT	0.413632
0.402769	0.476073	0.892578	sim_403	5498060000	ASCAT	0.838234
0.8703	0.904112	0.23943	sim_404	5500580000	ASCAT	0.826076
0.525679	0.800179	0.684327	sim_405	5496940000	ASCAT	1
0.887821	0.872328	0.465897	sim_406	5500580000	ASCAT	0.743091
0.764253	0.764474	0.207929	sim_407	5500520000	ASCAT	0.401019
0.23997	0.691026	0.910112	sim_408	5500580000	ASCAT	0.745554
0.920068	0.855199	0.235805	sim_409	5500560000	ASCAT	1
0.677421	0.833453	0.415653	sim_41	5498000000	ASCAT	0.261594
0.151521	0.31683	0.730929	sim_410	5500580000	ASCAT	0.317948
0.657535	0.865711	1.73798	sim_411	5500580000	ASCAT	0.843489
0.946548	0.983652	0.24759	sim_412	5500560000	ASCAT	0.687048
0.756061	0.827209	0.825066	sim_413	5500580000	ASCAT	0.865852
0.72622	0.723118	0.353109	sim_415	5500580000	ASCAT	0.65493
0.940156	0.941932	0.35412	sim_416	5496940000	ASCAT	0.968936
0.673396	0.704737	0.765262	sim_417	5500580000	ASCAT	0.458258
0.876543	0.77378	0.205316	sim_418	5496940000	ASCAT	0.884539
0.886109	0.988735	0.177457	sim_419	5499840000	ASCAT	0.960266
0.117438	0.319691	0.624716	sim_42	5500580000	ASCAT	0.948935
0.761775	0.775495	0.313982	sim_420	5500580000	ASCAT	0.336706
0.638188	0.904257	0.916282	sim_421	5500580000	ASCAT	0.826121
0.978307	0.98348	0.105252	sim_422	5411820000	ASCAT	1
0.129876	0.129697	0.231302	sim_423	5500580000	ASCAT	1
0.946245	0.893017	0.232132	sim_424	5500580000	ASCAT	0.935687
0.5434	0.572421	0.302043	sim_425	5495800000	ASCAT	0.885385
0.882752	0.883306	0.753687	sim_426	5499540000	ASCAT	0.786417
0.143195	0.410393	0.68495	sim_427	5500520000	ASCAT	0.744315
0.0723591	0.0728493	0.230501	sim_428	5500580000	ASCAT	0.897864
0.818625	0.809798	0.745753	sim_429	5495780000	ASCAT	0.641856
0.632588	0.632714	0.233024	sim_43	5500580000	ASCAT	0.721808
0.367299	0.229242	0.351354	sim_430	5500580000	ASCAT	0.611356
0.528434	0.763238	0.903671	sim_431	5500580000	ASCAT	0.766062
0.222341	0.222144	1.07498	sim_432	5500580000	ASCAT	0.197344
0.704694	0.800282	0.384555	sim_433	5496900000	ASCAT	0.635996
0.813002	0.752537	0.517879	sim_434	5500580000	ASCAT	0.530374
0.468857	0.780149	1.39067	sim_435	5496940000	ASCAT	0.949189
0.685106	0.684612	0.260914	sim_436	5500580000	ASCAT	0.567143
0.0922218	0.0898981	0.164071	sim_437	5498060000	ASCAT	0.268902
0.271435	0.255896	0.598071	sim_438	5500580000	ASCAT	0.867552
0.880034	0.860718	0.838936	sim_439	5497800000	ASCAT	0.552052
0.932621	0.994468	0.213626	sim_44	5500520000	ASCAT	0.889603
0.97078	0.956231	0.271195	sim_440	5495800000	ASCAT	0.830902
0.31927	0.580674	1.44768	sim_441	5495800000	ASCAT	0.818271
0.677628	0.862718	0.573704	sim_442	5500580000	ASCAT	0.725204
0.909931	0.891298	0.146335	sim_444	5495780000	ASCAT	0.817106
0.797511	0.83511	0.510521	sim_445	5499840000	ASCAT	1
0.604936	0.583165	0.483991	sim_446	5499720000	ASCAT	0.422425
0.772626	0.77319	0.231864	sim_447	5500580000	ASCAT	0.823593
0.210954	0.691213	1.34266	sim_448	5500520000	ASCAT	0.744323
0.0272718	0.0609009	0.554468	sim_449	5495780000	ASCAT	0.389723
0.852123	0.85508	0.279937	sim_45	5500580000	ASCAT	0.517582
0.898304	0.874905	0.397563	sim_450	5443020000	ASCAT	1
0.743658	0.650533	0.53733	sim_451	5500580000	ASCAT	0.385513
0.933089	0.915293	0.341281	sim_452	5500580000	ASCAT	0.633354
0.781179	0.822859	0.483634	sim_453	5500580000	ASCAT	0.629795
0.401168	0.582523	1.43284	sim_454	5500580000	ASCAT	0.265704
0.901738	0.935572	0.567738	sim_455	5495800000	ASCAT	1
0.832102	0.838802	0.488372	sim_457	5500580000	ASCAT	0.940748
0.875731	0.788479	0.506314	sim_458	5500580000	ASCAT	0.714633
0.496011	0.485449	0.357865	sim_459	5500580000	ASCAT	0.638617
0.865094	0.745548	0.230807	sim_46	5500580000	ASCAT	0.861985
0.602054	0.862931	1.04601	sim_460	5495800000	ASCAT	0.592665
0.638998	0.537466	0.326836	sim_461	5500580000	ASCAT	1
0.20123	0.647553	1.07378	sim_462	5500580000	ASCAT	0.84806
0.663813	0.716417	1.00755	sim_463	5500580000	ASCAT	0.912713
0.594951	0.562933	0.987522	sim_464	5500580000	ASCAT	0.89344
0.897096	0.916222	0.528997	sim_466	5495800000	ASCAT	0.781782
0.957043	0.933211	0.280931	sim_467	5500520000	ASCAT	0.887043
0.592766	0.570221	0.769299	sim_468	5499880000	ASCAT	0.427608
0.975657	0.983105	0.0854982	sim_469	5500580000	ASCAT	0.863679
0.65862	0.564495	0.733975	sim_47	5498460000	ASCAT	0.363221
0.501288	0.502625	0.344374	sim_470	5500580000	ASCAT	0.673408
0.721861	0.756587	0.659156	sim_471	5500580000	ASCAT	0.540079
0.930249	0.898498	0.236191	sim_472	5500580000	ASCAT	1
0.794782	0.698529	0.844417	sim_473	5500580000	ASCAT	0.327754
-0.000618265	-0.000684448	0.157915	sim_474	5500500000	ASCAT	0.223459
0.891006	0.864857	0.0360453	sim_475	5500520000	ASCAT	0.814209
0.914586	0.859739	0.516894	sim_476	5495800000	ASCAT	0.874726
0.835832	0.831165	1.15706	sim_477	5495800000	ASCAT	0.698743
0.794558	0.707674	0.369049	sim_478	5495800000	ASCAT	0.760167
0.774975	0.85534	1.01581	sim_479	5500580000	ASCAT	0.67
0.950095	0.886263	0.231278	sim_48	5500580000	ASCAT	0.699813
0.429527	0.5582	1.28831	sim_480	5500580000	ASCAT	0.447337
0.821433	0.818867	0.4802	sim_481	5500560000	ASCAT	0.46334
0.833775	0.746103	0.666028	sim_482	5495800000	ASCAT	0.563594
0.822911	0.879695	0.368772	sim_483	5500580000	ASCAT	0.892015
0.696924	0.571866	0.873472	sim_484	5500580000	ASCAT	0.389492
0.954098	0.938543	0.322182	sim_485	5500580000	ASCAT	0.989782
0.611933	0.53417	0.466143	sim_486	5500580000	ASCAT	0.416898
0.945176	0.906801	0.237286	sim_487	5500580000	ASCAT	1
0.909593	0.832736	0.328849	sim_488	5500580000	ASCAT	0.609243
0.214012	0.213573	0.897704	sim_489	5499880000	ASCAT	0.23822
0.983802	0.988238	0.208185	sim_49	5500580000	ASCAT	0.767859
0.465323	0.637094	0.503445	sim_490	5500580000	ASCAT	0.322311
0.552242	0.576723	0.479919	sim_491	5500580000	ASCAT	0.633081
0.335185	0.713511	0.690303	sim_492	5495800000	ASCAT	0.77535
0.868071	0.852598	0.643193	sim_493	5500580000	ASCAT	0.516871
0.531697	0.537561	0.571043	sim_494	5500560000	ASCAT	0.69459
0.673605	0.627634	0.349309	sim_495	5500580000	ASCAT	0.405209
0.924395	0.887873	0.199804	sim_496	5500560000	ASCAT	0.52926
0.639563	0.690102	0.755209	sim_497	5500580000	ASCAT	0.41
0.767548	0.700621	0.756323	sim_498	5500580000	ASCAT	0.276281
0.940404	0.905422	0.251074	sim_499	5499840000	ASCAT	0.766823
0.583297	0.659272	0.66512	sim_5	5500580000	ASCAT	0.292948
		0.0459817	sim_50	5498220000	ASCAT	0.763648
0.148361	0.14838	0.231727	sim_500	5500580000	ASCAT	0.896056
0.801542	0.847335	0.490832	sim_51	5500580000	ASCAT	0.927638
0.193891	0.417807	1.39726	sim_52	5499040000	ASCAT	0.416136
0.5368	0.53259	0.432199	sim_53	5495800000	ASCAT	0.69
0.0120146	0.0794818	1.37625	sim_54	5500580000	ASCAT	0.504846
0.537271	0.69098	1.22964	sim_55	5500520000	ASCAT	0.12
0.414896	0.416643	0.240106	sim_56	5500580000	ASCAT	0.367913
0.239691	0.615956	0.90694	sim_57	5500500000	ASCAT	0.279907
0.283308	0.470094	1.0476	sim_58	5500560000	ASCAT	0.339236
0.949929	0.852444	0.236222	sim_59	5500560000	ASCAT	0.919026
0.995686	0.998496	0.0707437	sim_6	5500520000	ASCAT	0.801615
0.906773	0.904449	0.286848	sim_60	5500580000	ASCAT	0.91783
0.496081	0.766847	1.17935	sim_61	5500580000	ASCAT	0.627691
0.681116	0.643826	0.844495	sim_62	5498740000	ASCAT	0.329397
0.869117	0.688364	0.229465	sim_63	5497120000	ASCAT	0.746104
0.955213	0.91599	0.440878	sim_64	5500580000	ASCAT	0.724349
0.912823	0.92202	0.433819	sim_65	5500580000	ASCAT	0.653693
0.863347	0.817566	0.412997	sim_66	5500580000	ASCAT	1
0.370254	0.558827	0.384285	sim_67	5500580000	ASCAT	1
0.533958	0.410697	1.04436	sim_69	5500580000	ASCAT	0.934751
0.905368	0.943274	0.42179	sim_7	5496940000	ASCAT	0.754866
0.831637	0.787098	0.839427	sim_70	5500580000	ASCAT	0.348559
0.169651	0.522685	2.30702	sim_71	5500520000	ASCAT	0.389035
0.882491	0.795164	0.245841	sim_72	5500580000	ASCAT	0.635623
0.783672	0.737355	0.243269	sim_73	5500580000	ASCAT	0.621706
0.645235	0.911602	1.24763	sim_74	5497980000	ASCAT	0.683652
0.584327	0.783901	1.44518	sim_75	5500580000	ASCAT	1
0.535281	0.536905	0.232254	sim_76	5500580000	ASCAT	0.694886
0.788584	0.676188	0.415347	sim_77	5500560000	ASCAT	0.417966
0.845015	0.81461	1.05812	sim_78	5500580000	ASCAT	0.345368
0.845702	0.898708	0.552102	sim_79	5496920000	ASCAT	0.808894
0.558109	0.527	1.2835	sim_8	5500580000	ASCAT	0.802454
0.00071488	0.000867984	1.03127	sim_80	5500580000	ASCAT	0.437851
0.282102	0.584358	1.20542	sim_81	5500560000	ASCAT	0.640787
0.867184	0.879086	0.231474	sim_82	5500580000	ASCAT	0.692884
0.572185	0.562443	0.36017	sim_83	5496940000	ASCAT	0.544421
0.435172	0.816697	1.38773	sim_84	5500500000	ASCAT	0.9694
0.988402	0.976941	0.132979	sim_85	5500520000	ASCAT	0.76663
0.941205	0.945679	0.232553	sim_86	5498060000	ASCAT	0.938751
0.353927	0.713832	0.68644	sim_87	5500520000	ASCAT	0.826133
0.778216	0.981056	0.719239	sim_88	5497380000	ASCAT	0.967223
0.388299	0.443853	1.42601	sim_89	5500580000	ASCAT	0.791668
0.472425	0.691362	0.837292	sim_9	5499740000	ASCAT	0.784922
0.719377	0.753076	0.287885	sim_90	5498640000	ASCAT	0.402183
0.726322	0.761894	0.545928	sim_91	5500580000	ASCAT	0.444439
0.309107	0.568791	1.59843	sim_92	5500580000	ASCAT	0.590287
0.457611	0.32941	0.210181	sim_93	5500580000	ASCAT	0.617735
0.358913	0.716348	1.30498	sim_94	5496940000	ASCAT	0.58003
0.587061	0.540702	0.516092	sim_95	5499880000	ASCAT	0.509099
0.723463	0.861778	1.80483	sim_96	5500580000	ASCAT	0.488378
0.972842	0.980242	0.309838	sim_97	5500580000	ASCAT	0.76516
0.336585	0.403892	0.610058	sim_98	5499540000	ASCAT	0.397565
0.960936	0.97582	0.242416	sim_99	5500580000	ASCAT	0.700552
0.265428	0.901717	3.09787	sim_1	5484320000	sequenza	1
0.681332	0.609173	0.526072	sim_10	5492900000	sequenza	0.604324
0.0877051	0.57808	2.91039	sim_100	5493980000	sequenza	0.826476
0.313693	0.886381	4.0253	sim_101	5480900000	sequenza	0.878798
0.242049	0.820074	4.12924	sim_102	5492720000	sequenza	0.615282
0.810007	0.715638	1.67844	sim_103	5492700000	sequenza	0.98101
0.239879	0.880168	4.75219	sim_104	5490380000	sequenza	0.66477
0.173302	0.675177	3.88707	sim_105	5492540000	sequenza	0.860313
0.734659	0.692504	1.4913	sim_106	5494620000	sequenza	0.223827
0.55841	0.481099	1.87331	sim_107	5491320000	sequenza	0.796065
0.0512204	0.130518	6.65994	sim_108	5488920000	sequenza	0.744101
0.447776	0.855946	1.5463	sim_109	5485220000	sequenza	0.889151
0.726804	0.638833	1.21998	sim_11	5492960000	sequenza	0.729402
0.812202	0.853162	1.31568	sim_110	5491820000	sequenza	1
0.890295	0.751706	0.775676	sim_111	5492780000	sequenza	0.582241
0.786662	0.663	1.65324	sim_112	5492320000	sequenza	0.838275
0.689346	0.564962	1.16212	sim_113	5494120000	sequenza	0.612104
0.847366	0.864189	0.415455	sim_114	5485260000	sequenza	0.437141
0.933415	0.917768	0.375179	sim_115	5483680000	sequenza	0.86
0.849135	0.823475	1.35292	sim_116	5491480000	sequenza	0.564662
0.6394	0.522848	1.33981	sim_117	5494040000	sequenza	0.55466
0.693732	0.80694	1.44587	sim_118	5492140000	sequenza	0.54599
0.853413	0.747021	1.66315	sim_119	5492740000	sequenza	1
0.643608	0.308291	2.83343	sim_12	5489680000	sequenza	0.700761
0.369932	0.773637	1.87057	sim_120	5493260000	sequenza	0.917769
0.516462	0.897615	0.975657	sim_121	5485720000	sequenza	0.329325
0.624463	0.591421	1.83437	sim_122	5492320000	sequenza	1
0.85147	0.881835	0.508612	sim_123	5472180000	sequenza	1
0.555332	0.925955	1.07846	sim_124	5489880000	sequenza	0.625519
0.570783	0.72509	0.672822	sim_125	5489900000	sequenza	0.272669
0.716863	0.645613	0.651413	sim_126	5491240000	sequenza	0.683799
0.705745	0.840025	1.02116	sim_127	5487920000	sequenza	0.786554
0.730182	0.798689	1.50619	sim_128	5486180000	sequenza	0.29
0.954319	0.971223	0.457987	sim_129	5484120000	sequenza	0.909245
0.754352	0.985518	1.23589	sim_13	5473100000	sequenza	0.14
0.722797	0.54224	1.21918	sim_130	5493580000	sequenza	0.989529
0.866953	0.844827	1.00168	sim_131	5492420000	sequenza	0.737661
0.96631	0.923062	0.35088	sim_132	5486580000	sequenza	0.733376
0.801846	0.846653	0.611089	sim_133	5484660000	sequenza	0.14
0.0921749	-2.75766e-05	1.75259	sim_134	5492080000	sequenza	0.826404
0.394429	0.708554	1.51542	sim_135	5491340000	sequenza	0.682461
0.589165	0.871463	1.03523	sim_136	5485880000	sequenza	0.746479
0.320091	0.879472	2.80513	sim_137	5487320000	sequenza	0.651578
0.944728	0.963825	0.334206	sim_138	5483380000	sequenza	0.917389
0.836742	0.889944	0.448028	sim_139	5488940000	sequenza	0.793126
0.457882	0.754278	1.93175	sim_14	5492600000	sequenza	0.760885
0.785416	0.679448	2.32449	sim_140	5489540000	sequenza	0.844597
0.076821	0.0684355	1.68907	sim_141	5493740000	sequenza	0.710192
0.805152	0.846041	0.493501	sim_142	5488760000	sequenza	0.393888
0.929853	0.779771	0.387509	sim_143	5490140000	sequenza	0.86
0.692884	0.971051	1.68285	sim_144	5476680000	sequenza	0.979862
0.657412	0.581549	1.46974	sim_145	5467880000	sequenza	0.913307
0.910727	0.45835	1.37059	sim_146	5492460000	sequenza	0.936464
0.989182	0.983872	0.140861	sim_147	5490480000	sequenza	0.657429
0.957325	0.953234	0.456124	sim_148	5463300000	sequenza	1
0.65832	0.386635	2.91849	sim_149	5489980000	sequenza	0.245767
0.931956	0.907683	0.371096	sim_15	5487280000	sequenza	0.20388
		0.88417	sim_150	5494620000	sequenza	0.937374
0.427854	0.401307	1.33769	sim_151	5494120000	sequenza	0.82536
0.388797	0.501134	1.75189	sim_152	5493780000	sequenza	1
0.483637	0.780935	2.63923	sim_153	5447900000	sequenza	0.492672
0.603552	0.481071	1.29262	sim_154	5491980000	sequenza	0.919295
0.966757	0.954571	0.447998	sim_155	5465700000	sequenza	0.266097
0.734769	0.787162	0.483678	sim_156	5491080000	sequenza	0.519862
0.21486	0.463734	1.72501	sim_157	5491880000	sequenza	0.791034
0.848554	0.746262	1.54608	sim_158	5379000000	sequenza	1
0.829627	0.90887	0.446618	sim_159	5487720000	sequenza	0.1
0.730432	0.933452	1.02337	sim_16	5480940000	sequenza	0.919395
0.811527	0.881158	0.459761	sim_160	5491520000	sequenza	0.339131
0.0741337	0.352529	3.70177	sim_161	5493680000	sequenza	0.828309
0.477288	0.469823	1.47075	sim_162	5491860000	sequenza	0.881212
0.72048	0.639889	1.21474	sim_163	5493040000	sequenza	0.372431
0.784113	0.719231	1.34058	sim_164	5494000000	sequenza	0.761675
0.637979	0.624153	0.519747	sim_165	5491460000	sequenza	0.948585
0.921603	0.923399	0.264901	sim_166	5485440000	sequenza	0.375182
0.829413	0.909315	0.467732	sim_167	5485540000	sequenza	1
0.689139	0.794218	0.653932	sim_168	5492180000	sequenza	0.473909
0.762014	0.663921	1.38208	sim_169	5492280000	sequenza	0.922356
0.941204	0.870111	1.46211	sim_17	5493400000	sequenza	0.739469
0.540214	0.488172	1.53987	sim_170	5494380000	sequenza	0.209723
0.923628	0.778269	1.744	sim_171	5492660000	sequenza	0.971931
0.932583	0.792183	1.35042	sim_172	5492660000	sequenza	0.483497
0.915183	0.880987	0.29023	sim_173	5491780000	sequenza	0.491577
0.337129	0.956579	4.89599	sim_174	5445120000	sequenza	0.48032
0.526555	0.252479	2.27191	sim_175	5492840000	sequenza	0.90276
0.89473	0.989157	0.431415	sim_176	5489280000	sequenza	0.719924
0.619509	0.738209	0.719473	sim_177	5493020000	sequenza	0.979786
0.376246	0.708613	0.793437	sim_178	5490660000	sequenza	0.830074
0.0233449	0.0276105	0.981809	sim_179	5494220000	sequenza	0.231211
0.0590166	0.0508186	1.30627	sim_18	5493340000	sequenza	0.581804
0.938358	0.853461	1.41055	sim_180	5493200000	sequenza	0.849926
0.242625	0.182653	3.10855	sim_181	5486280000	sequenza	0.887861
0.105966	0.124378	1.43379	sim_182	5493360000	sequenza	0.990056
0.347451	0.966563	3.30308	sim_183	5478460000	sequenza	0.435889
0.37503	0.814921	2.10649	sim_184	5492640000	sequenza	0.566711
0.532376	0.868661	1.16651	sim_185	5491780000	sequenza	0.683831
0.799016	0.777626	0.533495	sim_186	5489380000	sequenza	1
0.784185	0.765508	1.40419	sim_187	5493200000	sequenza	0.539731
0.511043	0.764055	1.04857	sim_188	5491200000	sequenza	0.799994
0.908089	0.653031	0.614125	sim_189	5493760000	sequenza	0.612407
0.925264	0.934779	0.469865	sim_19	5457840000	sequenza	0.287477
0.866733	0.847694	0.578492	sim_190	5479640000	sequenza	0.526432
0.624078	0.688773	0.678722	sim_191	5490900000	sequenza	0.89869
0.708503	0.604832	1.39917	sim_192	5493900000	sequenza	1
0.450989	0.663932	1.52615	sim_193	5493700000	sequenza	0.791998
0.342555	0.425009	0.52898	sim_194	5493480000	sequenza	1
0.605339	0.53471	1.91095	sim_195	5440780000	sequenza	0.449256
0.56491	0.414265	1.28157	sim_196	5493060000	sequenza	0.824689
0.36246	0.333769	1.74083	sim_197	5488180000	sequenza	0.627567
0.686989	0.553875	1.22492	sim_198	5494320000	sequenza	0.959985
0.103932	0.372043	3.76408	sim_199	5493380000	sequenza	0.659281
0.0642372	0.0925282	0.702613	sim_2	5494300000	sequenza	0.754893
0.336405	0.950432	2.51401	sim_20	5485200000	sequenza	0.495866
0.65238	0.762517	1.52606	sim_200	5492160000	sequenza	1
0.53884	0.714292	1.37266	sim_201	5485800000	sequenza	0.729961
0.775533	0.798103	0.447432	sim_202	5490000000	sequenza	0.835882
0.920016	0.9601	0.453646	sim_203	5481120000	sequenza	0.725093
0.767766	0.640538	1.61331	sim_204	5492420000	sequenza	0.862489
0.801886	0.722466	1.56349	sim_205	5492940000	sequenza	0.273873
0.635782	0.410969	2.82686	sim_206	5492300000	sequenza	0.496586
0.847621	0.834256	0.514751	sim_207	5488700000	sequenza	0.584756
0.764124	0.822981	0.538781	sim_208	5486980000	sequenza	0.767613
0.435608	0.951108	2.8109	sim_209	5481720000	sequenza	0.513774
0.725474	0.690678	0.46465	sim_21	5485980000	sequenza	0.859921
0.967286	0.955749	0.304185	sim_210	5479720000	sequenza	0.900874
0.654769	0.55458	1.71078	sim_211	5492660000	sequenza	0.599189
0.202067	0.581186	3.07246	sim_212	5492600000	sequenza	0.886321
0.553532	0.604876	1.35631	sim_213	5494420000	sequenza	0.427792
0.742479	0.909208	0.642432	sim_214	5454940000	sequenza	1
0.223173	0.630167	2.31587	sim_215	5492920000	sequenza	0.354162
0.165551	0.701993	3.45867	sim_216	5491500000	sequenza	0.927257
0.103977	0.68761	4.09546	sim_217	5485960000	sequenza	0.258944
0.876212	0.882374	0.409926	sim_218	5488060000	sequenza	0.87356
0.0418518	0.0211485	2.48601	sim_219	5492900000	sequenza	0.353073
0.21725	0.891342	5.09525	sim_22	5489780000	sequenza	0.303329
0.694194	0.594109	1.19749	sim_220	5494180000	sequenza	0.848152
0.822565	0.906776	0.626178	sim_221	5469460000	sequenza	1
0.836496	0.902745	0.467084	sim_222	5488080000	sequenza	0.312302
0.463618	0.862282	1.08749	sim_223	5488800000	sequenza	0.583136
0.209521	0.215315	1.44525	sim_224	5493940000	sequenza	0.70125
0.905838	0.881753	0.398515	sim_225	5489360000	sequenza	0.624092
0.24142	0.723353	3.50845	sim_226	5493820000	sequenza	1
0.834504	0.931936	0.679793	sim_227	5486200000	sequenza	0.790102
0.778077	0.982315	0.663255	sim_228	5486300000	sequenza	0.624974
0.119309	0.0875514	1.29235	sim_229	5494260000	sequenza	0.377983
0.889808	0.807893	1.53238	sim_23	5491400000	sequenza	1
0.94071	0.924097	0.44827	sim_230	5486300000	sequenza	0.71236
0.195831	0.90494	4.10745	sim_231	5488300000	sequenza	0.858288
0.890895	0.748707	1.64027	sim_232	5493020000	sequenza	0.843926
0.387825	0.98008	3.18263	sim_233	5477820000	sequenza	0.254355
0.438253	0.71678	2.04962	sim_234	5476260000	sequenza	0.867948
0.568021	0.941398	1.25135	sim_235	5490360000	sequenza	0.549273
0.749991	0.802297	0.629711	sim_236	5488840000	sequenza	0.780694
0.951432	0.924387	0.361106	sim_237	5487780000	sequenza	0.549443
0.92394	0.946455	0.392461	sim_238	5482280000	sequenza	0.614705
0.886875	0.838988	1.38516	sim_239	5490440000	sequenza	0.210031
0.957293	0.902789	0.351954	sim_24	5479700000	sequenza	0.690937
0.181476	0.576144	3.77056	sim_240	5494120000	sequenza	1
0.917519	0.916146	0.352099	sim_241	5489760000	sequenza	0.781936
		2.21407	sim_242	5494360000	sequenza	0.66
0.172194	0.746743	3.46137	sim_243	5488900000	sequenza	0.94
0.143784	0.792173	4.76056	sim_244	5491760000	sequenza	0.288315
0.354116	0.76356	1.62561	sim_245	5491840000	sequenza	0.249986
0.765871	0.838922	0.485505	sim_246	5492860000	sequenza	0.580086
0.954755	0.945992	0.406211	sim_247	5475360000	sequenza	0.571544
0.615	0.772574	1.88302	sim_248	5487260000	sequenza	0.952804
0.852133	0.854443	0.426634	sim_249	5488420000	sequenza	0.275604
0.955378	0.97372	0.283185	sim_25	5484100000	sequenza	0.8289
0.150876	0.112393	1.29218	sim_250	5493780000	sequenza	0.675066
0.956378	0.93151	0.393983	sim_251	5482100000	sequenza	0.509227
		1.31622	sim_252	5493860000	sequenza	1
0.74805	0.726033	1.51174	sim_253	5487260000	sequenza	0.948937
0.834891	0.786553	0.511205	sim_254	5489660000	sequenza	0.898025
0.573053	0.406897	2.97271	sim_255	5490320000	sequenza	0.304968
0.545115	0.425216	1.09988	sim_256	5493880000	sequenza	0.260199
0.861526	0.741906	1.49606	sim_257	5492720000	sequenza	0.453659
0.863658	0.866033	1.22461	sim_258	5492900000	sequenza	0.748709
0.00964555	0.250463	8.24741	sim_259	5492940000	sequenza	0.649652
0.288654	0.958771	3.59535	sim_26	5485240000	sequenza	0.507385
0.763659	0.798641	0.597711	sim_260	5487460000	sequenza	0.819398
0.704955	0.861015	0.816689	sim_261	5486400000	sequenza	0.462346
0.277113	0.374039	1.14614	sim_262	5492580000	sequenza	0.967254
0.524727	0.57571	0.389751	sim_263	5493780000	sequenza	0.66114
0.842782	0.892399	0.41351	sim_264	5491240000	sequenza	0.752983
0.628733	0.755372	0.645006	sim_265	5481800000	sequenza	0.67722
0.10126	0.563591	4.12037	sim_266	5493700000	sequenza	0.77652
0.962136	0.875238	0.361231	sim_267	5482340000	sequenza	0.697544
0.208965	0.820117	2.60568	sim_268	5486700000	sequenza	0.950863
0.743974	0.847505	0.480046	sim_269	5486300000	sequenza	0.916572
0.757511	0.782849	0.589674	sim_27	5490560000	sequenza	0.541571
0.932015	0.638189	1.37161	sim_270	5488080000	sequenza	0.486144
0.931915	0.904269	0.571922	sim_271	5476140000	sequenza	0.74581
0.476824	0.625851	1.59247	sim_272	5492500000	sequenza	1
0.580005	0.678145	0.510832	sim_273	5492720000	sequenza	0.907184
0.825459	0.886113	0.469762	sim_274	5489000000	sequenza	0.515997
0.654846	0.690524	1.66285	sim_275	5489460000	sequenza	0.868753
0.727224	0.743934	0.560644	sim_276	5491240000	sequenza	0.523134
0.763457	0.806406	0.528541	sim_277	5490320000	sequenza	0.544336
0.179039	0.729043	4.57791	sim_278	5492700000	sequenza	0.989865
0.637836	0.85554	1.88903	sim_279	5489420000	sequenza	0.777255
0.606461	0.500892	1.18239	sim_28	5493840000	sequenza	0.353897
0.173533	0.62234	4.16953	sim_280	5491800000	sequenza	0.786041
0.407244	0.559287	0.440141	sim_281	5492500000	sequenza	1
0.289023	0.68966	4.35915	sim_282	5492000000	sequenza	0.300182
0.506764	0.791268	0.888121	sim_283	5489640000	sequenza	0.280643
0.48772	0.919483	1.52287	sim_284	5476640000	sequenza	0.854194
0.710853	0.780074	1.34981	sim_285	5493660000	sequenza	0.557121
0.747262	0.782725	0.518844	sim_286	5489280000	sequenza	0.924617
0.820105	0.850573	0.535513	sim_287	5491860000	sequenza	0.298503
0.959011	0.945267	0.274609	sim_288	5478380000	sequenza	0.952423
0.220975	0.476796	2.64869	sim_289	5490180000	sequenza	0.505645
0.150411	0.569333	3.352	sim_29	5492760000	sequenza	0.303491
0.707624	0.875996	0.860667	sim_290	5485920000	sequenza	0.463721
0.712158	0.759749	1.73065	sim_291	5493640000	sequenza	0.46917
0.185553	0.077126	2.22513	sim_292	5491140000	sequenza	0.789134
0.326106	0.484832	0.671361	sim_293	5493560000	sequenza	0.520887
0.773302	0.839107	0.549716	sim_294	5490560000	sequenza	0.873565
0.264237	0.937949	3.50323	sim_295	5486020000	sequenza	0.677175
0.850927	0.866142	0.497361	sim_296	5486560000	sequenza	0.468841
0.421696	0.701539	2.22389	sim_297	5493780000	sequenza	0.79
0.908528	0.875844	0.373509	sim_298	5489340000	sequenza	0.771524
0.947919	0.910298	0.295341	sim_299	5488580000	sequenza	0.5237
0.224614	0.773639	4.00529	sim_3	5493480000	sequenza	0.969348
0.943428	0.964608	0.32114	sim_30	5478240000	sequenza	0.16
0.121725	0.852491	5.17438	sim_300	5487420000	sequenza	0.518671
0.979047	0.97593	0.447038	sim_301	5469860000	sequenza	1
0.902604	0.869581	1.58689	sim_302	5485900000	sequenza	0.918372
0.174559	0.851008	4.07173	sim_303	5487840000	sequenza	0.462689
0.897023	0.816716	1.64388	sim_304	5492440000	sequenza	0.621918
0.74413	0.733618	1.49269	sim_305	5492640000	sequenza	0.710255
0.226692	0.469265	2.14479	sim_306	5489940000	sequenza	0.959169
0.181761	0.779969	4.08918	sim_307	5493900000	sequenza	0.608756
0.722988	0.881877	0.798964	sim_308	5488400000	sequenza	1
0.918373	0.890385	0.430632	sim_309	5485300000	sequenza	0.958941
0.912088	0.932611	0.577195	sim_31	5486560000	sequenza	0.896305
0.24991	0.944174	4.90135	sim_310	5478660000	sequenza	0.558035
0.693463	0.580881	1.36547	sim_311	5493060000	sequenza	0.333847
0.275399	0.911105	4.05083	sim_312	5485460000	sequenza	0.793784
0.721254	0.631695	1.32389	sim_313	5490220000	sequenza	0.944593
0.894738	0.770692	1.45297	sim_314	5493460000	sequenza	0.746882
0.771375	0.809875	1.27499	sim_315	5492000000	sequenza	0.11
0.884186	0.960895	0.817537	sim_316	5483800000	sequenza	0.789506
0.181733	0.130561	1.60681	sim_317	5428680000	sequenza	0.41858
0.702229	0.812346	0.631712	sim_318	5490820000	sequenza	0.31714
0.193312	0.228758	0.381943	sim_319	5493700000	sequenza	0.498444
0.90161	0.906031	0.456703	sim_32	5476060000	sequenza	0.267263
0.764413	0.647363	1.2631	sim_320	5493180000	sequenza	0.86872
0.827926	0.712443	1.51959	sim_321	5492640000	sequenza	0.240015
0.533719	0.431013	1.27211	sim_322	5494320000	sequenza	0.927771
0.707193	0.784299	1.71641	sim_323	5492900000	sequenza	1
0.859794	0.848946	1.61165	sim_324	5492880000	sequenza	0.668238
0.806013	0.976343	0.521587	sim_325	5488180000	sequenza	1
0.694729	0.801646	0.719661	sim_326	5486380000	sequenza	0.318056
0.612194	0.473056	3.59169	sim_327	5486520000	sequenza	0.643557
0.877876	0.781186	1.33896	sim_328	5493600000	sequenza	0.457494
0.790477	0.754445	0.278027	sim_329	5489660000	sequenza	0.782708
0.649931	0.872423	0.75297	sim_33	5467520000	sequenza	1
0.809737	0.531311	1.96372	sim_330	5486800000	sequenza	1
0.909692	0.963166	0.627695	sim_331	5485600000	sequenza	0.917513
0.506718	0.8641	2.24144	sim_332	5492160000	sequenza	0.714814
0.906695	0.879987	1.49241	sim_333	5492200000	sequenza	0.269886
0.317734	0.297322	2.34454	sim_334	5490000000	sequenza	0.333647
0.362658	0.767633	2.30601	sim_335	5489620000	sequenza	0.38
0.882823	0.910091	0.466121	sim_336	5490880000	sequenza	0.613136
0.037809	0.33825	8.97747	sim_337	5491340000	sequenza	1
0.377899	0.772534	1.31238	sim_338	5492200000	sequenza	0.989764
0.586333	0.721698	1.49393	sim_339	5490500000	sequenza	0.653577
0.925436	0.949202	0.392899	sim_34	5487500000	sequenza	0.688112
0.880379	0.888243	0.462931	sim_340	5482620000	sequenza	1
0.848146	0.644118	1.47023	sim_341	5491160000	sequenza	0.836994
0.0107235	0.00519202	2.30488	sim_342	5487860000	sequenza	0.717932
0.910077	0.902942	1.5305	sim_343	5492940000	sequenza	0.969352
0.234132	0.689367	4.40829	sim_344	5492960000	sequenza	0.660166
0.786198	0.653526	1.67968	sim_345	5489760000	sequenza	1
0.378127	0.771336	1.51062	sim_346	5492380000	sequenza	0.373276
0.251214	0.830908	2.42256	sim_347	5482360000	sequenza	0.786751
0.897192	0.83186	1.15636	sim_348	5492660000	sequenza	0.893937
0.324367	0.89312	2.26692	sim_349	5485140000	sequenza	0.795595
0.961192	0.943324	0.206327	sim_35	5486160000	sequenza	0.191492
0.245493	0.937134	3.41052	sim_350	5488100000	sequenza	0.779156
0.795488	0.93416	0.524668	sim_351	5491560000	sequenza	0.693103
0.769911	0.736145	1.6677	sim_352	5492060000	sequenza	0.575592
0.362125	0.653863	1.24117	sim_353	5488780000	sequenza	0.9434
0.324859	0.893684	2.77767	sim_354	5470180000	sequenza	1
0.560253	0.690442	0.47076	sim_355	5492320000	sequenza	1
0.813647	0.873953	0.446617	sim_356	5491560000	sequenza	0.229286
0.621532	0.663833	1.4032	sim_357	5491160000	sequenza	0.959103
0.225615	0.952091	3.39872	sim_358	5484460000	sequenza	0.275733
0.371542	0.76554	1.92996	sim_359	5492080000	sequenza	0.634337
0.510874	0.745702	0.478148	sim_36	5491600000	sequenza	0.677426
0.629495	0.918052	1.60846	sim_360	5461580000	sequenza	0.543064
0.270332	0.90134	2.80961	sim_361	5487200000	sequenza	1
0.895539	0.80786	1.63726	sim_362	5492760000	sequenza	0.92076
0.749892	0.611771	1.29417	sim_363	5492940000	sequenza	0.225963
0.919349	0.8394	1.62458	sim_364	5488920000	sequenza	1
0.963853	0.700087	1.7455	sim_365	5494120000	sequenza	0.729391
0.913906	0.871796	0.415606	sim_366	5484620000	sequenza	0.875355
0.4113	0.885754	1.56345	sim_367	5489560000	sequenza	0.928555
0.547782	0.815222	0.937228	sim_368	5488500000	sequenza	0.80412
0.411242	0.347554	1.26634	sim_369	5494160000	sequenza	0.727682
0.883554	0.889227	0.419687	sim_37	5488180000	sequenza	0.452925
0.137649	0.390467	2.33783	sim_370	5492920000	sequenza	0.226751
0.87576	0.494684	0.649245	sim_371	5493740000	sequenza	0.741284
0.844021	0.727597	0.874304	sim_372	5492660000	sequenza	0.622521
0.831098	0.794858	0.853153	sim_373	5492920000	sequenza	1
0.824825	0.805676	0.409841	sim_374	5485200000	sequenza	0.3
0.857505	0.911812	0.496153	sim_375	5477440000	sequenza	0.949156
0.613182	0.752933	1.40588	sim_376	5493380000	sequenza	0.610147
0.599484	0.938227	1.97277	sim_377	5474960000	sequenza	0.989991
0.970208	0.850561	1.57054	sim_378	5490420000	sequenza	0.318313
0.38344	0.978649	3.75704	sim_379	5481820000	sequenza	0.540685
0.786121	0.86753	0.448244	sim_38	5489760000	sequenza	0.676738
0.308337	0.941013	1.90666	sim_380	5488400000	sequenza	0.407444
0.835126	0.543432	1.43617	sim_381	5492000000	sequenza	0.334534
0.770034	0.952239	1.04905	sim_382	5471500000	sequenza	1
0.696332	0.656465	2.52148	sim_383	5485980000	sequenza	0.206056
0.62173	0.789023	1.61402	sim_384	5493320000	sequenza	1
0.701631	0.666619	1.52407	sim_385	5493700000	sequenza	0.714667
0.79914	0.64419	1.26674	sim_386	5493020000	sequenza	0.742278
0.829942	0.75567	1.32494	sim_387	5494100000	sequenza	0.274961
0.875543	0.854284	0.556378	sim_388	5484520000	sequenza	0.265269
0.866041	0.972868	0.933497	sim_389	5471600000	sequenza	0.28507
0.808381	0.73867	0.343216	sim_39	5492360000	sequenza	0.482519
0.790957	0.504363	2.63506	sim_390	5487040000	sequenza	0.865282
0.273112	0.893713	4.36652	sim_391	5482080000	sequenza	0.718025
0.892585	0.858983	0.462573	sim_392	5490040000	sequenza	0.722832
0.879213	0.902386	0.317571	sim_393	5492720000	sequenza	0.681826
0.381962	0.273048	0.522424	sim_394	5493780000	sequenza	0.41697
0.878256	0.84408	0.616137	sim_395	5477880000	sequenza	0.35
0.763453	0.728675	0.557174	sim_396	5489100000	sequenza	0.641664
0.794905	0.851816	0.445648	sim_397	5490600000	sequenza	0.430104
		4.17298	sim_398	5490620000	sequenza	0.796021
0.839735	0.833542	0.583518	sim_399	5484580000	sequenza	0.647736
0.200711	0.742976	3.95446	sim_4	5492400000	sequenza	0.564132
0.614012	0.559787	0.501492	sim_40	5492320000	sequenza	0.78692
0.312446	0.184006	1.12804	sim_400	5493800000	sequenza	0.862223
0.901925	0.84189	0.34265	sim_401	5488580000	sequenza	0.924917
0.598481	0.689562	0.688149	sim_402	5493040000	sequenza	0.413632
0.571451	0.490417	0.5647	sim_403	5492740000	sequenza	0.838234
0.638736	0.598795	1.46489	sim_404	5493160000	sequenza	0.826076
0.333208	0.840043	2.97373	sim_405	5491420000	sequenza	1
0.933492	0.896033	0.350353	sim_406	5486640000	sequenza	0.743091
0.548861	0.542525	1.41639	sim_407	5492820000	sequenza	0.401019
0.732725	0.664954	1.30339	sim_408	5494140000	sequenza	0.745554
0.342293	0.689214	2.91729	sim_409	5493800000	sequenza	1
0.272836	0.895995	3.06723	sim_41	5491820000	sequenza	0.261594
0.368393	0.495988	1.85172	sim_410	5493640000	sequenza	0.317948
0.841963	0.935971	0.720325	sim_411	5477300000	sequenza	0.843489
0.792233	0.80654	0.519271	sim_412	5488520000	sequenza	0.687048
0.917888	0.907451	0.446032	sim_413	5487500000	sequenza	0.865852
0.34982	0.807678	1.4861	sim_414	5488080000	sequenza	0.377782
0.705961	0.601005	1.32036	sim_415	5489420000	sequenza	0.65493
0.322639	0.927949	2.83665	sim_416	5488940000	sequenza	0.968936
0.62055	0.916476	1.04304	sim_417	5485160000	sequenza	0.458258
0.741733	0.51705	1.44337	sim_418	5493940000	sequenza	0.884539
0.450915	0.565001	1.82298	sim_419	5491660000	sequenza	0.960266
0.26381	0.256217	1.26184	sim_42	5493620000	sequenza	0.948935
0.739282	0.761045	1.45049	sim_420	5493380000	sequenza	0.336706
0.917874	0.91513	0.3275	sim_421	5489940000	sequenza	0.826121
0.256299	0.770839	4.0999	sim_422	5404320000	sequenza	1
0.0570352	0.0478111	2.34339	sim_423	5492020000	sequenza	1
0.818039	0.776093	0.455181	sim_424	5487900000	sequenza	0.935687
0.566912	0.190668	2.52793	sim_425	5490860000	sequenza	0.885385
0.739673	0.895836	1.2633	sim_426	5464200000	sequenza	0.786417
0.274263	0.303912	1.40671	sim_427	5493220000	sequenza	0.744315
0.0805609	0.0599585	1.60718	sim_428	5493680000	sequenza	0.897864
0.913197	0.911154	0.513608	sim_429	5485080000	sequenza	0.641856
0.584562	0.500139	1.31317	sim_43	5493740000	sequenza	0.721808
0.109994	0.145329	7.88163	sim_430	5489380000	sequenza	0.611356
0.261226	0.944414	2.64062	sim_431	5491260000	sequenza	0.766062
0.858284	0.939491	0.364874	sim_432	5490300000	sequenza	0.197344
0.858404	0.796243	1.41339	sim_433	5493000000	sequenza	0.635996
0.943292	0.963091	0.266417	sim_434	5488460000	sequenza	0.530374
0.534588	0.900672	1.40108	sim_435	5485240000	sequenza	0.949189
0.678297	0.548069	1.31593	sim_436	5493960000	sequenza	0.567143
0.0456318	0.0911269	1.80452	sim_437	5493640000	sequenza	0.268902
0.517034	0.391278	1.25868	sim_438	5489960000	sequenza	0.867552
0.541712	0.961187	2.14278	sim_439	5482040000	sequenza	0.552052
0.648816	0.604087	1.48843	sim_44	5491620000	sequenza	0.889603
0.949096	0.907647	0.356104	sim_440	5485660000	sequenza	0.830902
0.655116	0.825321	0.71548	sim_441	5482420000	sequenza	0.818271
0.498262	0.594583	0.676454	sim_442	5490140000	sequenza	0.725204
0.761682	0.732706	0.473516	sim_443	5491260000	sequenza	0.192515
0.759704	0.595374	1.33187	sim_444	5491640000	sequenza	0.817106
0.458343	0.800375	1.09667	sim_445	5490560000	sequenza	1
0.886365	0.863686	1.36518	sim_446	5490160000	sequenza	0.422425
0.800104	0.673094	1.25011	sim_447	5493680000	sequenza	0.823593
0.126557	0.474955	3.65574	sim_448	5490940000	sequenza	0.744323
0.0737774	0.173626	4.08194	sim_449	5487840000	sequenza	0.389723
0.706752	0.579138	1.42079	sim_45	5490500000	sequenza	0.517582
0.285684	0.902027	2.65588	sim_450	5441480000	sequenza	1
0.775836	0.760513	0.517248	sim_451	5492560000	sequenza	0.385513
0.669225	0.883937	0.94223	sim_452	5485600000	sequenza	0.633354
0.756678	0.727124	0.520601	sim_453	5490020000	sequenza	0.629795
0.982443	0.974943	0.211937	sim_454	5482160000	sequenza	0.265704
0.273418	0.95584	3.71781	sim_455	5451900000	sequenza	1
0.55686	0.644111	0.808253	sim_456	5486980000	sequenza	0.83
0.900298	0.867974	0.35956	sim_457	5489000000	sequenza	0.940748
0.886187	0.820813	0.47802	sim_458	5485560000	sequenza	0.714633
0.533631	0.474194	1.31995	sim_459	5494040000	sequenza	0.638617
0.862067	0.611537	1.29712	sim_46	5492220000	sequenza	0.861985
0.820663	0.828815	0.491439	sim_460	5486380000	sequenza	0.592665
0.593429	0.594523	0.385033	sim_461	5492360000	sequenza	1
0.148395	0.162434	1.04519	sim_462	5494380000	sequenza	0.84806
0.509121	0.53406	0.513152	sim_463	5491840000	sequenza	0.912713
0.403693	0.3582	0.588918	sim_464	5492920000	sequenza	0.89344
0.508588	0.584193	1.07557	sim_465	5491000000	sequenza	0.890469
0.702425	0.95227	1.11298	sim_466	5474540000	sequenza	0.781782
0.59737	0.857435	1.15983	sim_467	5490020000	sequenza	0.887043
0.852342	0.732679	1.53688	sim_468	5490600000	sequenza	0.427608
0.55628	0.613223	1.6954	sim_469	5493140000	sequenza	0.863679
0.235629	0.80185	3.385	sim_47	5492180000	sequenza	0.363221
0.598878	0.507693	1.26986	sim_470	5494380000	sequenza	0.673408
0.841373	0.876714	0.459805	sim_471	5488820000	sequenza	0.540079
0.91173	0.888069	1.54006	sim_472	5489980000	sequenza	1
0.967012	0.937358	0.329373	sim_473	5477860000	sequenza	0.327754
-0.000600152	-0.000780788	1.16683	sim_474	5494520000	sequenza	0.223459
0.042166	0.190288	3.37857	sim_475	5493980000	sequenza	0.814209
0.790773	0.892624	0.892447	sim_476	5480260000	sequenza	0.874726
0.819476	0.949113	1.19351	sim_477	5478100000	sequenza	0.698743
0.531699	0.651158	1.94054	sim_478	5492620000	sequenza	0.760167
0.603498	0.776009	0.778259	sim_479	5492260000	sequenza	0.67
0.922667	0.847931	1.67435	sim_48	5492580000	sequenza	0.699813
0.253298	0.893649	3.44917	sim_480	5490300000	sequenza	0.447337
0.645418	0.722117	0.85634	sim_481	5491120000	sequenza	0.46334
0.874889	0.842022	0.508757	sim_482	5487800000	sequenza	0.563594
0.732803	0.760115	0.479287	sim_483	5489540000	sequenza	0.892015
0.236705	0.952332	3.24425	sim_484	5487940000	sequenza	0.389492
0.876453	0.898811	0.521055	sim_485	5486420000	sequenza	0.989782
0.825697	0.891534	0.345569	sim_486	5488380000	sequenza	0.416898
0.630197	0.688266	0.742616	sim_487	5491560000	sequenza	1
0.935331	0.893315	1.68779	sim_488	5488840000	sequenza	0.609243
0.884848	0.839276	1.64983	sim_489	5486320000	sequenza	0.23822
0.933311	0.989028	0.42631	sim_49	5488080000	sequenza	0.767859
0.396572	0.517434	1.25174	sim_490	5492760000	sequenza	0.322311
0.0852372	0.289369	5.73671	sim_491	5492700000	sequenza	0.633081
0.606074	0.669605	1.44292	sim_492	5488840000	sequenza	0.77535
0.779809	0.942339	0.918835	sim_493	5477200000	sequenza	0.516871
0.715985	0.691928	0.433321	sim_494	5487480000	sequenza	0.69459
0.890659	0.616886	1.29003	sim_495	5492900000	sequenza	0.405209
0.91299	0.756302	1.40727	sim_496	5492240000	sequenza	0.52926
0.857317	0.808608	0.39629	sim_497	5489860000	sequenza	0.41
0.865404	0.80293	0.529027	sim_498	5483100000	sequenza	0.276281
0.918128	0.896105	1.65224	sim_499	5491320000	sequenza	0.766823
0.673165	0.723628	0.766642	sim_5	5491160000	sequenza	0.292948
		1.62261	sim_50	5493460000	sequenza	0.763648
0.097782	0.0646906	2.55281	sim_500	5492240000	sequenza	0.896056
0.184007	0.88284	4.33621	sim_51	5488240000	sequenza	0.927638
0.832994	0.91298	0.411537	sim_52	5491960000	sequenza	0.416136
0.789225	0.713259	1.34646	sim_53	5488900000	sequenza	0.69
0.0385538	0.0508158	0.475862	sim_54	5492800000	sequenza	0.504846
0.875652	0.666663	1.38749	sim_55	5493300000	sequenza	0.12
0.0630577	0.259906	3.56626	sim_56	5494240000	sequenza	0.367913
0.82109	0.781608	0.340161	sim_57	5489680000	sequenza	0.279907
0.189083	0.740053	3.49464	sim_58	5482480000	sequenza	0.339236
0.601194	0.761624	2.36259	sim_59	5486080000	sequenza	0.919026
0.708841	0.852373	2.21558	sim_6	5490500000	sequenza	0.801615
0.868014	0.795447	1.57014	sim_60	5491660000	sequenza	0.91783
0.218107	0.933749	3.73106	sim_61	5489660000	sequenza	0.627691
0.834729	0.885172	0.650743	sim_62	5480520000	sequenza	0.329397
0.773752	0.47284	1.41106	sim_63	5493920000	sequenza	0.746104
0.392972	0.925282	3.43398	sim_64	5474000000	sequenza	0.724349
0.859877	0.950382	0.524348	sim_65	5487300000	sequenza	0.653693
0.507972	0.821047	1.20225	sim_66	5489020000	sequenza	1
0.261445	0.410151	1.59812	sim_67	5493700000	sequenza	1
0.0741106	0.213979	3.55649	sim_68	5490000000	sequenza	0.515443
0.608781	0.237773	1.79389	sim_69	5482640000	sequenza	0.934751
0.459029	0.773925	1.34121	sim_7	5484420000	sequenza	0.754866
0.29947	0.949527	4.11475	sim_70	5479560000	sequenza	0.348559
0.700637	0.469575	0.633651	sim_71	5493840000	sequenza	0.389035
0.868803	0.699965	1.42381	sim_72	5492860000	sequenza	0.635623
0.661634	0.490352	2.05203	sim_73	5491460000	sequenza	0.621706
0.228728	0.864589	3.40975	sim_74	5488200000	sequenza	0.683652
0.294763	0.946649	3.52457	sim_75	5473960000	sequenza	1
0.538233	0.359879	1.22773	sim_76	5493280000	sequenza	0.694886
0.841521	0.744739	1.58629	sim_77	5492680000	sequenza	0.417966
0.506225	0.966479	2.83114	sim_78	5462380000	sequenza	0.345368
0.743136	0.801184	0.687104	sim_79	5482020000	sequenza	0.808894
0.315576	0.57516	3.64543	sim_8	5482640000	sequenza	0.802454
0.0111614	0.00883116	1.80764	sim_80	5491180000	sequenza	0.437851
0.337286	0.526441	1.20699	sim_81	5493220000	sequenza	0.640787
0.125004	0.448921	3.73412	sim_82	5494160000	sequenza	0.692884
0.663333	0.523153	1.29591	sim_83	5493400000	sequenza	0.544421
0.914811	0.929281	0.330335	sim_84	5491480000	sequenza	0.9694
0.871148	0.856397	0.476784	sim_85	5488600000	sequenza	0.76663
0.19375	0.787331	2.66265	sim_86	5491180000	sequenza	0.938751
0.81439	0.79934	1.26112	sim_87	5493600000	sequenza	0.826133
0.617878	0.924893	0.950503	sim_88	5487320000	sequenza	0.967223
0.831034	0.717101	2.11953	sim_89	5481740000	sequenza	0.791668
0.866982	0.833533	1.00936	sim_9	5489160000	sequenza	0.784922
0.550051	0.607832	1.56024	sim_90	5492740000	sequenza	0.402183
0.337872	0.865745	1.8752	sim_91	5489620000	sequenza	0.444439
0.91533	0.879823	0.342498	sim_92	5487500000	sequenza	0.590287
0.284599	0.176963	0.972463	sim_93	5494680000	sequenza	0.617735
0.198473	0.861486	3.84459	sim_94	5488860000	sequenza	0.58003
0.625467	0.726566	1.34279	sim_95	5489880000	sequenza	0.509099
0.984181	0.98065	0.31413	sim_96	5472080000	sequenza	0.488378
0.943132	0.920708	0.423128	sim_97	5476280000	sequenza	0.76516
0.847847	0.782125	1.25898	sim_98	5493140000	sequenza	0.397565
0.784671	0.853995	0.530359	sim_99	5491840000	sequenza	0.700552
0.919074	0.914856	1.10009	sim_1	5414420000	facets	1
0.230452	0.114943	1.78214	sim_10	5337420000	facets	0.604324
-0.223262	-0.314175	1.7628	sim_100	5308560000	facets	0.826476
0.582896	0.235614	1.35293	sim_101	5390640000	facets	0.878798
0.931849	0.850725	0.662932	sim_102	5279820000	facets	0.615282
0.926883	0.71628	0.734703	sim_103	5330420000	facets	0.98101
0.80996	0.882066	1.00871	sim_104	5331980000	facets	0.66477
0.468207	0.287676	2.01019	sim_105	5307960000	facets	0.860313
0.807581	0.773311	1.34992	sim_106	5343260000	facets	0.223827
0.257233	0.146265	1.17307	sim_107	5340020000	facets	0.796065
0.0758835	0.0775664	1.03018	sim_108	5349100000	facets	0.744101
0.611057	0.494559	1.48111	sim_109	5338520000	facets	0.889151
0.168177	0.119216	1.07304	sim_11	5418200000	facets	0.729402
0.820233	0.726181	1.36161	sim_110	5362980000	facets	1
0.135375	-0.0868721	2.74362	sim_111	5287520000	facets	0.582241
0.831531	0.739724	0.746891	sim_112	5307140000	facets	0.838275
0.474252	0.490759	1.00646	sim_113	5370100000	facets	0.612104
0.382847	0.307175	1.57134	sim_114	5394840000	facets	0.437141
0.812777	0.792073	1.0781	sim_115	5324380000	facets	0.86
0.713288	0.696124	0.724181	sim_116	5221280000	facets	0.564662
0.248276	0.189762	1.00881	sim_117	5303380000	facets	0.55466
0.855178	0.825911	0.355107	sim_118	5410640000	facets	0.54599
-0.03265	-0.152167	2.58127	sim_119	5276480000	facets	1
0.57163	0.291083	1.1401	sim_12	5395920000	facets	0.700761
0.685687	0.610636	1.44669	sim_120	5335940000	facets	0.917769
0.67534	0.653342	1.29568	sim_121	5275200000	facets	0.329325
0.872363	0.696093	1.10214	sim_122	5440640000	facets	1
0.927008	0.939822	1.73684	sim_123	5411220000	facets	1
0.789457	0.820103	1.00546	sim_124	5261040000	facets	0.625519
-0.267961	-0.286765	1.38494	sim_125	5446580000	facets	0.272669
0.150509	-0.0396325	1.67533	sim_126	5384640000	facets	0.683799
0.955881	0.867467	2.07617	sim_127	5425640000	facets	0.786554
0.449412	0.315019	2.77477	sim_128	5390500000	facets	0.29
0.8792	0.871111	1.51904	sim_129	5453700000	facets	0.909245
0.83084	0.847241	1.57834	sim_13	5346800000	facets	0.14
0.697248	0.470858	1.53871	sim_130	5384140000	facets	0.989529
0.954139	0.942881	0.881641	sim_131	5311200000	facets	0.737661
0.923689	0.882863	0.771645	sim_132	5445700000	facets	0.733376
0.439995	0.164607	2.28367	sim_133	5207140000	facets	0.14
0.120646	0.0636749	0.942774	sim_134	5357720000	facets	0.826404
0.622322	0.194859	1.82984	sim_135	5367660000	facets	0.682461
0.471986	0.573962	1.14704	sim_136	5427440000	facets	0.746479
0.880811	0.919636	0.847235	sim_137	5413300000	facets	0.651578
0.643658	0.683093	1.11745	sim_138	5411040000	facets	0.917389
0.765243	0.726463	0.795035	sim_139	5242580000	facets	0.793126
0.817873	0.73093	4.6141	sim_14	5359920000	facets	0.760885
0.935137	0.855447	0.933464	sim_140	5407740000	facets	0.844597
0.169551	0.0890082	1.02855	sim_141	5299820000	facets	0.710192
0.896486	0.865472	1.26726	sim_142	5351140000	facets	0.393888
0.659301	0.354128	1.57137	sim_143	5388780000	facets	0.86
0.826121	0.789326	1.19955	sim_144	5429000000	facets	0.979862
0.244566	0.0785	1.22836	sim_145	5486720000	facets	0.913307
0.884615	0.365181	0.886734	sim_146	5345260000	facets	0.936464
0.784719	0.804609	1.12997	sim_147	5281180000	facets	0.657429
0.834087	0.781231	1.12823	sim_148	5378060000	facets	1
0.72509	0.496852	0.550463	sim_149	5256040000	facets	0.245767
0.930781	0.882628	1.84767	sim_15	5451780000	facets	0.20388
		0.668257	sim_150	5253240000	facets	0.937374
0.74706	0.46144	1.21662	sim_151	5280400000	facets	0.82536
0.336767	0.197274	2.81824	sim_152	5297280000	facets	1
0.715704	0.738024	1.03435	sim_153	5468300000	facets	0.492672
0.590071	0.485561	0.971329	sim_154	5398260000	facets	0.919295
0.874442	0.784182	1.07807	sim_155	5397660000	facets	0.266097
0.847355	0.842391	1.97422	sim_156	5333900000	facets	0.519862
0.0422839	0.119559	0.903461	sim_157	5315800000	facets	0.791034
0.903306	0.769143	1.04952	sim_158	5304540000	facets	1
0.912673	0.904167	1.53184	sim_159	5408080000	facets	0.1
0.292008	0.0722373	1.37667	sim_16	5382320000	facets	0.919395
0.180641	-0.0995389	1.47543	sim_160	5379040000	facets	0.339131
0.0852895	0.0912864	2.78939	sim_161	5349700000	facets	0.828309
-0.21905	-0.285177	1.05052	sim_162	5252700000	facets	0.881212
-0.0146848	-0.0929077	3.05016	sim_163	5396680000	facets	0.372431
0.879492	0.804228	0.663589	sim_164	5439760000	facets	0.761675
0.354	0.32024	1.76666	sim_165	5422480000	facets	0.948585
0.867809	0.817215	1.19188	sim_166	5402220000	facets	0.375182
0.363904	0.323677	1.08546	sim_167	5418160000	facets	1
0.733456	0.899043	0.769174	sim_168	5386800000	facets	0.473909
0.400623	0.193003	2.75885	sim_169	5381320000	facets	0.922356
0.509973	0.351955	1.16361	sim_17	5416300000	facets	0.739469
0.649927	0.538332	2.95206	sim_170	5304240000	facets	0.209723
0.633581	0.124197	2.70058	sim_171	5314080000	facets	0.971931
0.393421	0.106533	1.87178	sim_172	5322820000	facets	0.483497
0.923368	0.834381	1.08266	sim_173	5316720000	facets	0.491577
0.800189	0.734874	1.07958	sim_174	5373240000	facets	0.48032
0.743146	0.309136	1.26624	sim_175	5440580000	facets	0.90276
0.785214	0.796899	1.19324	sim_176	5412940000	facets	0.719924
0.885862	0.850498	0.990847	sim_177	5274640000	facets	0.979786
0.775186	0.635216	1.17019	sim_178	5396960000	facets	0.830074
0.000564797	0.000207264	0.617217	sim_179	5258700000	facets	0.231211
0.00136887	0.000494928	1.01984	sim_18	5286380000	facets	0.581804
-0.310329	-0.463722	2.5137	sim_180	5385180000	facets	0.849926
0.123887	0.0934991	1.14443	sim_181	5281640000	facets	0.887861
0.43921	0.167648	0.33889	sim_182	5326020000	facets	0.990056
0.881123	0.869103	1.1303	sim_183	5390540000	facets	0.435889
0.515902	0.559472	1.07639	sim_184	5312180000	facets	0.566711
0.625174	0.391046	1.92908	sim_185	5352200000	facets	0.683831
0.228968	-0.207698	1.63307	sim_186	5404340000	facets	1
0.892373	0.728129	1.75373	sim_187	5307080000	facets	0.539731
0.7312	0.591134	1.94221	sim_188	5328740000	facets	0.799994
0.934484	0.628543	0.571843	sim_189	5406980000	facets	0.612407
0.872841	0.869424	4.72772	sim_19	5456060000	facets	0.287477
0.58305	0.356331	1.45975	sim_190	5436280000	facets	0.526432
0.549602	0.47626	1.76168	sim_191	5393760000	facets	0.89869
0.318627	0.246957	0.991446	sim_192	5393780000	facets	1
0.0749823	0.0681302	2.8048	sim_193	5305080000	facets	0.791998
-0.162714	-0.274265	1.75963	sim_194	5302620000	facets	1
0.506566	0.407564	2.30308	sim_195	5326480000	facets	0.449256
0.328374	0.372883	2.87439	sim_196	5372640000	facets	0.824689
0.248006	0.197152	1.49004	sim_197	5444760000	facets	0.627567
0.280717	0.198106	1.06763	sim_198	5378900000	facets	0.959985
0.281822	0.119838	1.1358	sim_199	5294500000	facets	0.659281
0.240876	0.150017	0.590927	sim_2	5406380000	facets	0.754893
0.818672	0.811891	1.48392	sim_20	5396140000	facets	0.495866
0.758638	0.506917	1.75287	sim_200	5304280000	facets	1
0.0899136	0.0400705	1.11535	sim_201	5418440000	facets	0.729961
-0.160526	-0.37309	1.38888	sim_202	5433000000	facets	0.835882
0.860488	0.795135	1.44782	sim_203	5347740000	facets	0.725093
0.715356	0.392516	1.15569	sim_204	5290600000	facets	0.862489
0.814726	0.79668	1.0331	sim_205	5278160000	facets	0.273873
0.378801	0.296527	1.06353	sim_206	5252060000	facets	0.496586
0.278588	-0.06685	2.27106	sim_207	5431660000	facets	0.584756
0.284863	0.214342	1.49271	sim_208	5365660000	facets	0.767613
0.75359	0.793023	1.09164	sim_209	5425040000	facets	0.513774
0.114015	-0.103647	1.67833	sim_21	5349680000	facets	0.859921
0.845562	0.84562	0.83107	sim_210	5448840000	facets	0.900874
0.401574	0.388878	0.987967	sim_211	5264420000	facets	0.599189
0.414512	0.263831	1.12211	sim_212	5333040000	facets	0.886321
0.193832	0.195598	1.07014	sim_213	5306180000	facets	0.427792
0.497547	0.418583	1.21087	sim_214	5374620000	facets	1
0.822568	0.738234	1.18437	sim_215	5268440000	facets	0.354162
0.0826952	-0.190628	2.1394	sim_216	5349960000	facets	0.927257
0.367414	0.212116	1.73342	sim_217	5356820000	facets	0.258944
0.931938	0.913337	1.27105	sim_218	5250200000	facets	0.87356
0.024393	0.0407968	1.18142	sim_219	5350720000	facets	0.353073
0.884931	0.834909	0.701134	sim_22	5354540000	facets	0.303329
0.48521	0.568244	2.94664	sim_220	5256860000	facets	0.848152
0.932731	0.897766	1.38443	sim_221	5399340000	facets	1
0.754933	0.780714	1.21448	sim_222	5385500000	facets	0.312302
0.202491	0.0177169	1.52909	sim_223	5432520000	facets	0.583136
0.527843	0.280719	2.14072	sim_224	5343620000	facets	0.70125
0.94806	0.930718	1.54416	sim_225	5402580000	facets	0.624092
0.580152	0.370906	1.0464	sim_226	5356460000	facets	1
0.882685	0.849473	1.03977	sim_227	5444400000	facets	0.790102
0.932889	0.89973	1.79198	sim_228	5396580000	facets	0.624974
0.186364	0.118827	1.08323	sim_229	5358220000	facets	0.377983
0.854378	0.867692	0.620988	sim_23	5237660000	facets	1
0.973579	0.932147	1.82667	sim_230	5381260000	facets	0.71236
0.780875	0.763837	1.00666	sim_231	5341020000	facets	0.858288
0.858742	0.420114	2.01519	sim_232	5398920000	facets	0.843926
0.833729	0.812024	0.977054	sim_233	5385360000	facets	0.254355
0.583098	0.353504	1.33461	sim_234	5380060000	facets	0.867948
0.841775	0.898187	1.04308	sim_235	5353420000	facets	0.549273
0.760892	0.754275	1.12645	sim_236	5330500000	facets	0.780694
0.958024	0.874004	1.6023	sim_237	5280560000	facets	0.549443
0.465672	0.125629	1.49322	sim_238	5448900000	facets	0.614705
0.478294	0.405069	1.91373	sim_239	5353000000	facets	0.210031
0.896898	0.779026	1.4192	sim_24	5335960000	facets	0.690937
0.814079	0.761324	0.787112	sim_240	5250980000	facets	1
0.841108	0.857885	0.974766	sim_241	5417940000	facets	0.781936
		1.04533	sim_242	5360900000	facets	0.66
0.743213	0.687527	0.903131	sim_243	5319260000	facets	0.94
0.0497418	-0.111958	2.13398	sim_244	5350160000	facets	0.288315
0.188362	-0.210796	2.56468	sim_245	5288140000	facets	0.249986
0.640927	0.427417	1.86793	sim_246	5378380000	facets	0.580086
0.874912	0.849139	1.56674	sim_247	5451940000	facets	0.571544
0.791301	0.717258	1.00869	sim_248	5306700000	facets	0.952804
0.938963	0.896898	1.12701	sim_249	5306700000	facets	0.275604
0.567984	0.56358	1.13789	sim_25	5386860000	facets	0.8289
0.108333	0.151012	1.02723	sim_250	5341720000	facets	0.675066
0.901072	0.900395	0.799875	sim_251	5420340000	facets	0.509227
		1.21075	sim_252	5424220000	facets	1
-0.235935	-0.330692	2.80108	sim_253	5202380000	facets	0.948937
0.798766	0.62085	1.99935	sim_254	5373960000	facets	0.898025
-0.0517267	-0.126227	2.54702	sim_255	5417040000	facets	0.304968
0.285371	0.21201	2.72623	sim_256	5418540000	facets	0.260199
0.778978	0.6525	1.02518	sim_257	5391860000	facets	0.453659
-0.160302	-0.357621	3.09134	sim_258	5322820000	facets	0.748709
0.157572	0.161893	1.25411	sim_259	5358160000	facets	0.649652
0.855859	0.902804	1.26079	sim_26	5415120000	facets	0.507385
0.898514	0.873058	1.17314	sim_260	5383080000	facets	0.819398
0.317635	0.057084	1.49838	sim_261	5355240000	facets	0.462346
0.155844	0.00632913	2.60025	sim_262	5330820000	facets	0.967254
0.619264	0.606311	1.05819	sim_263	5307320000	facets	0.66114
0.862939	0.775986	3.0268	sim_264	5407380000	facets	0.752983
0.74543	0.759807	1.99992	sim_265	5364900000	facets	0.67722
-0.265267	-0.318552	2.57433	sim_266	5335640000	facets	0.77652
0.886421	0.778682	2.0536	sim_267	5426280000	facets	0.697544
0.902251	0.832374	0.792134	sim_268	5404800000	facets	0.950863
0.510048	0.457737	1.5425	sim_269	5389440000	facets	0.916572
0.861975	0.681053	1.42191	sim_27	5098920000	facets	0.541571
0.847644	0.48281	1.07619	sim_270	5361040000	facets	0.486144
0.784304	0.410486	1.34845	sim_271	5404480000	facets	0.74581
0.719473	0.696764	1.11409	sim_272	5357520000	facets	1
0.0138043	-0.150135	1.78339	sim_273	5412500000	facets	0.907184
0.877586	0.935372	0.63695	sim_274	5254440000	facets	0.515997
0.373778	0.298834	1.71635	sim_275	5286840000	facets	0.868753
0.299717	-0.216877	1.74474	sim_276	5274860000	facets	0.523134
0.391716	0.21084	1.68406	sim_277	5358640000	facets	0.544336
0.429741	0.363532	1.26608	sim_278	5265300000	facets	0.989865
0.865204	0.836374	0.732729	sim_279	5357860000	facets	0.777255
0.240705	0.225261	1.08948	sim_28	5300940000	facets	0.353897
0.733692	0.773426	1.85543	sim_280	5448460000	facets	0.786041
0.0509864	-0.0303508	1.74468	sim_281	5404840000	facets	1
0.829	0.486111	2.89789	sim_282	5381820000	facets	0.300182
0.330053	0.242904	1.42015	sim_283	5398900000	facets	0.280643
0.949434	0.951958	1.30964	sim_284	5427300000	facets	0.854194
0.749901	0.56033	0.501297	sim_285	5320940000	facets	0.557121
0.656122	0.536119	1.52628	sim_286	5445980000	facets	0.924617
0.92976	0.875215	1.24829	sim_287	5348520000	facets	0.298503
0.829033	0.86355	0.873511	sim_288	5324980000	facets	0.952423
0.352391	0.402809	1.08598	sim_289	5442440000	facets	0.505645
0.561063	0.489731	2.11035	sim_29	5273180000	facets	0.303491
0.963846	0.94065	2.0572	sim_290	5433720000	facets	0.463721
0.939342	0.861991	0.639512	sim_291	5393360000	facets	0.46917
0.0638115	0.0903311	1.26204	sim_292	5419920000	facets	0.789134
0.581388	0.500533	1.11366	sim_293	5323060000	facets	0.520887
0.59747	0.430804	1.62122	sim_294	5401560000	facets	0.873565
0.930247	0.954069	0.977847	sim_295	5287280000	facets	0.677175
0.503321	0.456322	1.25183	sim_296	5435700000	facets	0.468841
0.897239	0.752543	0.570278	sim_297	5363400000	facets	0.79
0.851821	0.79826	1.59167	sim_298	5374620000	facets	0.771524
0.446818	0.050211	1.37637	sim_299	5419660000	facets	0.5237
0.867206	0.757233	4.3372	sim_3	5387400000	facets	0.969348
0.859282	0.891288	0.682553	sim_30	5267320000	facets	0.16
0.421015	0.356056	1.1898	sim_300	5408340000	facets	0.518671
0.896649	0.714414	1.16439	sim_301	5376580000	facets	1
0.532391	0.341153	2.4755	sim_302	5432720000	facets	0.918372
0.828386	0.77312	2.04071	sim_303	5455260000	facets	0.462689
0.929258	0.814953	1.6349	sim_304	5285080000	facets	0.621918
0.641295	0.742957	1.30634	sim_305	5365120000	facets	0.710255
0.658147	0.577753	1.06021	sim_306	5286340000	facets	0.959169
-0.445889	-0.519265	2.54185	sim_307	5373680000	facets	0.608756
0.966427	0.978183	0.847595	sim_308	5481120000	facets	1
0.868667	0.891079	0.787507	sim_309	5431900000	facets	0.958941
0.823418	0.8571	0.875457	sim_31	5427280000	facets	0.896305
0.883144	0.827467	2.37845	sim_310	5463220000	facets	0.558035
0.225557	0.229918	2.68167	sim_311	5165940000	facets	0.333847
0.599652	0.483023	1.43424	sim_312	5382680000	facets	0.793784
0.37143	0.347414	1.16199	sim_313	5433720000	facets	0.944593
0.836975	0.510235	2.46371	sim_314	5342520000	facets	0.746882
0.816313	0.706307	1.55639	sim_315	5246300000	facets	0.11
0.896456	0.876095	1.002	sim_316	5375120000	facets	0.789506
0.0601406	0.020474	2.18935	sim_317	5486000000	facets	0.41858
0.22045	-0.0100482	1.5931	sim_318	5368460000	facets	0.31714
0.0373058	0.0372527	0.582377	sim_319	5301060000	facets	0.498444
0.679015	0.661224	1.02766	sim_32	5429160000	facets	0.267263
0.217836	0.242411	2.4906	sim_320	5417120000	facets	0.86872
0.902723	0.758066	0.697353	sim_321	5367720000	facets	0.240015
0.733001	0.545495	0.401755	sim_322	5314720000	facets	0.927771
0.916124	0.724373	1.3687	sim_323	5413140000	facets	1
0.48298	0.441862	0.978568	sim_324	5332700000	facets	0.668238
0.866851	0.843113	0.868531	sim_325	5347380000	facets	1
0.342274	0.210872	1.22005	sim_326	5447640000	facets	0.318056
0.650891	0.546158	1.19663	sim_327	5255840000	facets	0.643557
0.3777	0.267612	2.73669	sim_328	5371640000	facets	0.457494
0.304861	0.240179	1.54311	sim_329	5398920000	facets	0.782708
0.93298	0.840662	1.38868	sim_33	5306320000	facets	1
0.749831	0.496493	1.17921	sim_330	5440400000	facets	1
0.835588	0.799829	2.32912	sim_331	5442560000	facets	0.917513
-0.0282116	-0.163105	2.38572	sim_332	5361760000	facets	0.714814
0.896998	0.891878	0.947322	sim_333	5371540000	facets	0.269886
-0.142438	-0.134987	2.57095	sim_334	5377980000	facets	0.333647
0.0050437	0.00588259	1.71778	sim_335	5363300000	facets	0.38
0.83866	0.852488	1.94883	sim_336	5368000000	facets	0.613136
0.454983	0.468864	0.557863	sim_337	5386420000	facets	1
0.189301	-0.0667615	1.38876	sim_338	5384000000	facets	0.989764
0.590652	0.555304	2.10618	sim_339	5386920000	facets	0.653577
0.871495	0.917601	0.839438	sim_34	5286940000	facets	0.688112
0.468619	0.43097	1.33628	sim_340	5436440000	facets	1
0.647663	0.545552	0.920409	sim_341	5255000000	facets	0.836994
-0.00401219	-0.00440774	1.05567	sim_342	5404060000	facets	0.717932
-0.29758	-0.41012	2.90592	sim_343	5371680000	facets	0.969352
0.921872	0.716068	0.532456	sim_344	5283020000	facets	0.660166
0.356855	0.265063	1.20158	sim_345	5318940000	facets	1
0.546271	0.623824	0.733114	sim_346	5487520000	facets	0.373276
0.624843	0.531576	0.804932	sim_347	5426660000	facets	0.786751
0.947402	0.943014	0.900288	sim_348	5337520000	facets	0.893937
0.73694	0.566541	1.40311	sim_349	5392520000	facets	0.795595
0.482073	0.353448	1.41375	sim_35	5408000000	facets	0.191492
0.750278	0.846151	1.20846	sim_350	5388860000	facets	0.779156
0.934867	0.969278	1.00478	sim_351	5376400000	facets	0.693103
0.525085	0.322235	2.76556	sim_352	5316480000	facets	0.575592
0.0826174	0.122909	1.177	sim_353	5320200000	facets	0.9434
0.497419	0.367815	1.31024	sim_354	5424720000	facets	1
0.224341	0.0676589	1.69929	sim_355	5366680000	facets	1
0.0959937	-0.0829479	1.54958	sim_356	5395980000	facets	0.229286
0.187203	0.185052	1.26063	sim_357	5340960000	facets	0.959103
0.661484	0.659504	0.930342	sim_358	5386060000	facets	0.275733
0.0535557	0.0128111	2.69987	sim_359	5430440000	facets	0.634337
0.254257	0.224491	1.63203	sim_36	5371960000	facets	0.677426
0.649209	0.461648	1.29147	sim_360	5388700000	facets	0.543064
0.885219	0.820128	1.96546	sim_361	5352820000	facets	1
0.938177	0.754264	2.61621	sim_362	5418980000	facets	0.92076
0.563161	0.357818	1.04377	sim_363	5381060000	facets	0.225963
0.554915	0.349603	1.89648	sim_364	5381760000	facets	1
0.974404	0.612358	3.69247	sim_365	5380780000	facets	0.729391
0.780078	0.768918	1.14212	sim_366	5434660000	facets	0.875355
-0.00999764	-0.191664	1.52999	sim_367	5412840000	facets	0.928555
0.426976	0.361558	1.49095	sim_368	5439000000	facets	0.80412
0.72103	0.412059	0.515742	sim_369	5309700000	facets	0.727682
0.260393	0.166394	1.49207	sim_37	5337040000	facets	0.452925
0.153178	0.205422	1.08937	sim_370	5346980000	facets	0.226751
0.956134	0.578896	5.19263	sim_371	5263660000	facets	0.741284
0.866654	0.972539	1.04484	sim_372	5348840000	facets	0.622521
0.904468	0.847594	0.93541	sim_373	5431000000	facets	1
0.821884	0.854465	1.94183	sim_374	5374920000	facets	0.3
0.301135	0.109579	0.975901	sim_375	5450360000	facets	0.949156
0.114576	0.0775238	2.77721	sim_376	5367220000	facets	0.610147
0.912148	0.918432	2.28359	sim_377	5442980000	facets	0.989991
0.62275	0.409423	1.50931	sim_378	5449440000	facets	0.318313
0.791485	0.689497	1.06449	sim_379	5429580000	facets	0.540685
0.368571	0.0552605	1.62815	sim_38	5318420000	facets	0.676738
0.481202	0.377425	1.44099	sim_380	5442700000	facets	0.407444
0.706294	0.409519	2.8744	sim_381	5334660000	facets	0.334534
0.862419	0.854676	1.64307	sim_382	5371120000	facets	1
0.529157	0.404755	2.41484	sim_383	5403920000	facets	0.206056
0.285192	0.175258	1.03043	sim_384	5304520000	facets	1
0.859733	0.757629	1.23331	sim_385	5334000000	facets	0.714667
0.619729	0.587014	1.9666	sim_386	5366160000	facets	0.742278
0.414594	0.353502	1.13767	sim_387	5365820000	facets	0.274961
0.604135	0.4093	1.38742	sim_388	5318560000	facets	0.265269
0.774943	0.755136	1.1294	sim_389	5410640000	facets	0.28507
-0.0206214	-0.137949	2.44477	sim_39	5292880000	facets	0.482519
0.890982	0.697187	0.528525	sim_390	5293880000	facets	0.865282
0.869163	0.875061	1.29821	sim_391	5408740000	facets	0.718025
0.563162	0.404475	1.75686	sim_392	5156840000	facets	0.722832
0.917308	0.778582	0.718834	sim_393	5263380000	facets	0.681826
0.424022	0.356808	2.94433	sim_394	5299940000	facets	0.41697
0.729848	0.582164	1.02239	sim_395	5414240000	facets	0.35
0.70033	0.37682	1.85443	sim_396	5432800000	facets	0.641664
0.315006	0.196738	1.47029	sim_397	5443440000	facets	0.430104
		1.08855	sim_398	5299280000	facets	0.796021
0.542329	-0.0189533	2.43608	sim_399	5449340000	facets	0.647736
0.925548	0.781749	1.9851	sim_4	5318580000	facets	0.564132
-0.0459755	-0.137804	1.79023	sim_40	5424140000	facets	0.78692
-0.23318	-0.250024	2.53213	sim_400	5275800000	facets	0.862223
0.288969	0.122253	1.45252	sim_401	5431560000	facets	0.924917
0.918686	0.775643	0.963399	sim_402	5442880000	facets	0.413632
0.101812	-0.0764605	1.75727	sim_403	5330300000	facets	0.838234
0.36842	0.342143	1.00904	sim_404	5401520000	facets	0.826076
0.786641	0.697138	1.43397	sim_405	5407320000	facets	1
0.537043	0.265168	1.46935	sim_406	5344680000	facets	0.743091
0.316139	0.461608	1.88967	sim_407	5339840000	facets	0.401019
0.664804	0.608974	1.28574	sim_408	5469940000	facets	0.745554
0.80348	0.439385	1.0939	sim_409	5287580000	facets	1
0.864845	0.834516	0.899178	sim_41	5301960000	facets	0.261594
0.864277	0.493608	0.936649	sim_410	5340560000	facets	0.317948
0.718592	0.636948	0.952857	sim_411	5440340000	facets	0.843489
0.907774	0.859685	1.41905	sim_412	5345080000	facets	0.687048
0.731917	0.792839	1.15982	sim_413	5428520000	facets	0.865852
0.288813	0.178922	1.54393	sim_414	5339820000	facets	0.377782
0.188029	0.192138	2.46004	sim_415	5386980000	facets	0.65493
0.860864	0.87715	0.830676	sim_416	5284880000	facets	0.968936
0.729155	0.657731	1.62876	sim_417	5398620000	facets	0.458258
0.871328	0.448776	3.17501	sim_418	5316720000	facets	0.884539
0.672233	0.587415	2.05974	sim_419	5270020000	facets	0.960266
0.00842928	0.00897474	1.16503	sim_42	5368260000	facets	0.948935
-0.205609	-0.348908	2.6631	sim_420	5380140000	facets	0.336706
0.817385	0.871388	0.96688	sim_421	5442240000	facets	0.826121
0.527223	0.500193	0.950813	sim_422	5223180000	facets	1
0.0371827	0.0458404	3.21502	sim_423	5368120000	facets	1
0.909428	0.745636	0.903043	sim_424	5368980000	facets	0.935687
0.458196	0.301007	1.11547	sim_425	5372300000	facets	0.885385
0.656386	0.517229	1.20933	sim_426	5433760000	facets	0.786417
0.496781	0.301864	1.43955	sim_427	5319360000	facets	0.744315
0.193242	0.170058	1.02052	sim_428	5360100000	facets	0.897864
0.869362	0.828883	1.47386	sim_429	5377000000	facets	0.641856
0.806036	0.607905	0.344367	sim_43	5309700000	facets	0.721808
0.444693	0.163415	0.819861	sim_430	5363020000	facets	0.611356
0.934415	0.878928	1.02729	sim_431	5404560000	facets	0.766062
0.902138	0.805231	0.735191	sim_432	5375660000	facets	0.197344
0.914052	0.799808	0.566114	sim_433	5297260000	facets	0.635996
0.865314	0.92808	0.70296	sim_434	5166800000	facets	0.530374
0.398262	0.0548669	1.54137	sim_435	5328420000	facets	0.949189
0.879826	0.737451	0.602771	sim_436	5419220000	facets	0.567143
0.0958808	0.119759	1.10425	sim_437	5262360000	facets	0.268902
0.576007	0.342365	1.29703	sim_438	5370980000	facets	0.867552
0.81892	0.778117	2.27692	sim_439	5307380000	facets	0.552052
0.610966	0.631552	1.22293	sim_44	5289880000	facets	0.889603
0.922554	0.884597	0.8257	sim_440	5329580000	facets	0.830902
0.44592	0.384766	1.29995	sim_441	5364860000	facets	0.818271
0.391879	0.343204	0.676323	sim_442	5323340000	facets	0.725204
0.436765	0.344479	1.6958	sim_443	5368640000	facets	0.192515
0.729211	0.59709	1.43216	sim_444	5311660000	facets	0.817106
0.115678	0.0107622	1.48368	sim_445	5458460000	facets	1
-0.103853	-0.193073	2.25391	sim_446	5427860000	facets	0.422425
-0.440222	-0.466505	2.61491	sim_447	5425440000	facets	0.823593
0.536543	0.518188	1.02441	sim_448	5333020000	facets	0.744323
0.27644	0.205864	0.64622	sim_449	5278780000	facets	0.389723
0.829066	0.688411	1.65748	sim_45	5324000000	facets	0.517582
0.551379	0.3084	1.17423	sim_450	5424400000	facets	1
0.745985	0.455118	1.94958	sim_451	5370520000	facets	0.385513
0.920529	0.874032	1.24673	sim_452	5386260000	facets	0.633354
0.70018	0.655128	0.892702	sim_453	5391520000	facets	0.629795
0.890385	0.918914	1.27565	sim_454	5374400000	facets	0.265704
0.926883	0.916151	2.77911	sim_455	5386840000	facets	1
0.383944	0.283525	1.33517	sim_456	5398840000	facets	0.83
0.327167	0.192692	1.52796	sim_457	5401320000	facets	0.940748
0.595789	0.108798	1.51864	sim_458	5417160000	facets	0.714633
0.201576	0.188369	1.2561	sim_459	5300780000	facets	0.638617
0.745297	0.485968	1.07316	sim_46	5301480000	facets	0.861985
0.796931	0.832236	1.10032	sim_460	5373340000	facets	0.592665
0.601921	0.409916	1.12345	sim_461	5417040000	facets	1
0.0315382	0.0356656	0.604943	sim_462	5278540000	facets	0.84806
0.30607	0.296126	0.817967	sim_463	5302060000	facets	0.912713
0.693997	0.518062	1.9363	sim_464	5330080000	facets	0.89344
0.268747	0.284251	1.35072	sim_465	5381280000	facets	0.890469
0.723579	0.551144	0.864485	sim_466	5398820000	facets	0.781782
0.745014	0.356803	1.7197	sim_467	5284440000	facets	0.887043
0.891995	0.704618	0.821432	sim_468	5351140000	facets	0.427608
0.35066	0.249419	2.70631	sim_469	5363640000	facets	0.863679
0.822981	0.510865	2.75665	sim_47	5340460000	facets	0.363221
0.314873	0.331771	2.39418	sim_470	5291780000	facets	0.673408
0.779393	0.839515	1.23773	sim_471	5401060000	facets	0.540079
0.975548	0.9636	2.56377	sim_472	5318800000	facets	1
0.740906	0.709179	1.06881	sim_473	5414100000	facets	0.327754
0.00059477	0.000678673	1.08718	sim_474	5282100000	facets	0.223459
0.0194407	0.0157248	1.02282	sim_475	5306480000	facets	0.814209
0.590022	0.310364	1.4221	sim_476	5365580000	facets	0.874726
0.68966	0.503391	1.36697	sim_477	5325520000	facets	0.698743
0.749007	0.556197	2.17986	sim_478	5336820000	facets	0.760167
0.578133	0.673639	0.753713	sim_479	5338200000	facets	0.67
0.93988	0.907363	0.744885	sim_48	5397400000	facets	0.699813
0.918658	0.859408	1.51786	sim_480	5340860000	facets	0.447337
0.885047	0.927076	0.855338	sim_481	5360060000	facets	0.46334
0.690787	0.514506	0.993794	sim_482	5310260000	facets	0.563594
0.188145	0.00617316	1.56926	sim_483	5280040000	facets	0.892015
0.927981	0.895595	1.47716	sim_484	5396400000	facets	0.389492
0.867399	0.890323	0.808782	sim_485	5383260000	facets	0.989782
0.330385	0.37147	1.63193	sim_486	5433560000	facets	0.416898
0.536357	0.0461128	1.70043	sim_487	5324000000	facets	1
0.951806	0.905253	0.911772	sim_488	5369220000	facets	0.609243
0.29335	-0.0786082	1.98844	sim_489	5335040000	facets	0.23822
0.936103	0.937571	1.13471	sim_49	5437700000	facets	0.767859
-0.205966	-0.376551	1.78008	sim_490	5423300000	facets	0.322311
0.276207	0.274383	0.606725	sim_491	5267260000	facets	0.633081
0.484777	0.362161	1.12459	sim_492	5350540000	facets	0.77535
0.825672	0.848671	2.01597	sim_493	5390480000	facets	0.516871
0.318907	0.242634	1.67118	sim_494	5364580000	facets	0.69459
0.50925	0.345001	2.74226	sim_495	5301620000	facets	0.405209
0.644326	0.447058	1.09438	sim_496	5273500000	facets	0.52926
0.277248	0.134851	1.69945	sim_497	5415940000	facets	0.41
0.861338	0.902676	0.830108	sim_498	5372120000	facets	0.276281
0.932607	0.9066	0.737465	sim_499	5388240000	facets	0.766823
0.923869	0.772259	1.24021	sim_5	5367280000	facets	0.292948
		4.94173	sim_50	5374760000	facets	0.763648
0.121577	0.0804262	1.34165	sim_500	5367120000	facets	0.896056
0.440007	0.329319	1.38495	sim_51	5419200000	facets	0.927638
0.961002	0.891784	0.914202	sim_52	5349980000	facets	0.416136
0.0279942	-0.145173	2.77406	sim_53	5262920000	facets	0.69
-0.0435526	-0.0592925	1.89719	sim_54	5397920000	facets	0.504846
0.878785	0.723649	0.735596	sim_55	5394780000	facets	0.12
0.70015	0.456534	1.00191	sim_56	5308640000	facets	0.367913
0.738284	0.626049	2.32736	sim_57	5453420000	facets	0.279907
0.353265	0.244087	1.4002	sim_58	5447700000	facets	0.339236
0.63227	0.0354425	2.46031	sim_59	5353840000	facets	0.919026
0.192363	-0.138467	2.1619	sim_6	5265900000	facets	0.801615
0.937639	0.925561	1.04804	sim_60	5378440000	facets	0.91783
0.468647	0.255678	1.53472	sim_61	5398160000	facets	0.627691
0.866161	0.888334	1.2814	sim_62	5281300000	facets	0.329397
0.857623	0.597831	1.08723	sim_63	5319500000	facets	0.746104
0.879166	0.788345	1.01534	sim_64	5436800000	facets	0.724349
0.793936	0.853024	1.02187	sim_65	5416560000	facets	0.653693
0.578044	0.106033	0.992193	sim_66	5349860000	facets	1
0.717565	0.512033	1.05201	sim_67	5305000000	facets	1
0.427308	0.457361	1.20645	sim_68	5436420000	facets	0.515443
0.403766	0.215671	0.805124	sim_69	5406720000	facets	0.934751
0.317293	0.126043	1.38313	sim_7	5355720000	facets	0.754866
0.891166	0.901532	1.25078	sim_70	5389500000	facets	0.348559
0.700989	0.314276	1.10337	sim_71	5397560000	facets	0.389035
-0.118772	-0.236132	3.45031	sim_72	5331580000	facets	0.635623
0.471189	0.409363	2.85922	sim_73	5297080000	facets	0.621706
0.791877	0.77132	1.6293	sim_74	5360820000	facets	0.683652
0.703415	0.62339	1.11069	sim_75	5363360000	facets	1
0.526947	0.404754	1.05168	sim_76	5424320000	facets	0.694886
0.924114	0.793946	0.967124	sim_77	5382820000	facets	0.417966
0.88012	0.896385	1.37249	sim_78	5400720000	facets	0.345368
0.89066	0.880158	2.40064	sim_79	5421620000	facets	0.808894
0.0593341	-0.0591916	1.15196	sim_8	5401520000	facets	0.802454
0.00182192	0.00249466	0.623015	sim_80	5307960000	facets	0.437851
-0.230052	-0.396343	1.003	sim_81	5341820000	facets	0.640787
0.0279371	0.223194	2.89139	sim_82	5297820000	facets	0.692884
0.0130226	-0.0928807	2.80183	sim_83	5310920000	facets	0.544421
0.513858	0.402472	0.779399	sim_84	5389340000	facets	0.9694
0.66668	0.354051	0.869291	sim_85	5368280000	facets	0.76663
0.906209	0.872541	5.67385	sim_86	5378800000	facets	0.938751
0.708958	0.607254	1.32991	sim_87	5355280000	facets	0.826133
0.535511	0.549302	1.02813	sim_88	5368820000	facets	0.967223
0.55938	0.512031	1.19913	sim_89	5416180000	facets	0.791668
0.413372	0.0651862	2.68623	sim_9	5388520000	facets	0.784922
-0.231954	-0.339343	2.80171	sim_90	5317460000	facets	0.402183
0.771546	0.727702	1.38632	sim_91	5438000000	facets	0.444439
0.351153	-0.117887	1.4897	sim_92	5327400000	facets	0.590287
0.554595	0.143015	2.60295	sim_93	5438200000	facets	0.617735
0.8404	0.757324	1.99339	sim_94	5432720000	facets	0.58003
-0.0927842	-0.197797	2.66375	sim_95	5430880000	facets	0.509099
0.904057	0.893478	1.23638	sim_96	5402420000	facets	0.488378
0.841599	0.850859	0.828608	sim_97	5356520000	facets	0.76516
0.85007	0.638672	1.18342	sim_98	5384720000	facets	0.397565
0.909066	0.824031	1.19108	sim_99	5293460000	facets	0.700552
0.970429	0.987186	0.247035	sim_1	5203240000	titan	1
0.956886	0.928782	0.156395	sim_10	5208320000	titan	0.604324
0.854894	0.853659	0.15597	sim_100	5207200000	titan	0.826476
0.879344	0.857297	0.661462	sim_101	5196440000	titan	0.878798
0.896897	0.857307	0.241947	sim_102	5209180000	titan	0.615282
0.996944	0.99772	0.0453903	sim_103	5208640000	titan	0.98101
0.858401	0.862605	0.305297	sim_104	5204800000	titan	0.66477
0.998596	0.997809	0.0196626	sim_105	5209020000	titan	0.860313
0.932858	0.932136	0.144725	sim_106	5207560000	titan	0.223827
0.889302	0.619183	1.14578	sim_107	5202120000	titan	0.796065
0.798667	0.795914	0.0558853	sim_108	5209260000	titan	0.744101
0.762128	0.643044	0.636381	sim_109	5193520000	titan	0.889151
0.992621	0.990924	0.0274862	sim_11	5209120000	titan	0.729402
0.979767	0.956911	1.29796	sim_110	5206120000	titan	1
0.959541	0.930509	0.154485	sim_111	5208080000	titan	0.582241
0.98561	0.994096	0.0886733	sim_112	5208560000	titan	0.838275
0.972054	0.972067	0.0515776	sim_113	5209360000	titan	0.612104
0.390871	0.653495	1.69732	sim_114	5200180000	titan	0.437141
[truncated: 977 more rows]
