# Supplementary material for: Most large structural variants in cancer genomes can be detected without long reads
Source: Nat Genet. 2023 Nov 9;55(12):2139–48. doi: 10.1038/s41588-023-01540-6 (PMC10703688; doi:10.1038/s41588-023-01540-6)
Supplement: Supplementary file 10 — Statistical source data for Extended Data Fig. 4. [file 41588_2023_1540_MOESM10_ESM.xlsx]

## Sheet: 4A
sample	purity.category	balanced.levels	frac
sim_286	high purity	nonreciprocal	0.963855
sim_473	low purity	nonreciprocal	0.811739
sim_155	low purity	nonreciprocal	0.786391
sim_123	high purity	nonreciprocal	0.945652
sim_144	high purity	nonreciprocal	0.943419
sim_64	high purity	nonreciprocal	0.965142
sim_397	low purity	nonreciprocal	0.900826
sim_124	high purity	nonreciprocal	0.918782
sim_75	high purity	nonreciprocal	0.943287
sim_284	high purity	nonreciprocal	0.932673
sim_360	high purity	nonreciprocal	0.907499
sim_361	high purity	nonreciprocal	0.945652
sim_379	high purity	nonreciprocal	0.902111
sim_132	high purity	nonreciprocal	0.959821
sim_35	low purity	nonreciprocal	0.655263
sim_132	high purity	reciprocal balanced	0.875
sim_261	low purity	nonreciprocal	0.442379
sim_142	low purity	nonreciprocal	0.555
sim_13	low purity	reciprocal balanced	0.25641
sim_174	low purity	nonreciprocal	0.890341
sim_412	high purity	nonreciprocal	0.941176
sim_377	high purity	nonreciprocal	0.954823
sim_96	low purity	nonreciprocal	0.903288
sim_61	high purity	nonreciprocal	0.978142
sim_74	high purity	nonreciprocal	0.961977
sim_233	low purity	nonreciprocal	0.653451
sim_494	high purity	nonreciprocal	0.950185
sim_233	low purity	reciprocal balanced	0.518519
sim_457	high purity	nonreciprocal	0.985222
sim_79	high purity	nonreciprocal	0.967066
sim_480	low purity	nonreciprocal	0.925234
sim_170	low purity	nonreciprocal	0.0625
sim_16	high purity	nonreciprocal	0.957066
sim_247	high purity	nonreciprocal	0.927568
sim_247	high purity	reciprocal balanced	0.666667
sim_372	high purity	nonreciprocal	1
sim_389	low purity	nonreciprocal	0.797856
sim_17	high purity	nonreciprocal	0.97619
sim_148	high purity	nonreciprocal	0.942702
sim_172	low purity	nonreciprocal	0.923077
sim_87	high purity	nonreciprocal	1
sim_49	high purity	nonreciprocal	0.956522
sim_176	high purity	nonreciprocal	0.956522
sim_129	high purity	nonreciprocal	0.977401
sim_101	high purity	nonreciprocal	0.945869
sim_411	high purity	nonreciprocal	0.953748
sim_486	low purity	nonreciprocal	0.882353
sim_277	high purity	nonreciprocal	0.926667
sim_155	low purity	reciprocal balanced	0.75
sim_143	high purity	nonreciprocal	0.972727
sim_493	high purity	nonreciprocal	0.917827
sim_312	high purity	nonreciprocal	0.95297
sim_348	high purity	nonreciprocal	0.958333
sim_462	high purity	nonreciprocal	0.894737
sim_222	low purity	reciprocal balanced	0.4375
sim_485	high purity	nonreciprocal	0.958057
sim_203	high purity	nonreciprocal	0.956743
sim_273	high purity	nonreciprocal	1
sim_78	low purity	nonreciprocal	0.847398
sim_24	high purity	nonreciprocal	0.935238
sim_416	high purity	nonreciprocal	0.971311
sim_432	low purity	nonreciprocal	0.323308
sim_360	high purity	reciprocal unbalanced	0.796296
sim_360	high purity	reciprocal balanced	0.716814
sim_463	high purity	nonreciprocal	1
sim_238	high purity	nonreciprocal	0.939686
sim_421	high purity	nonreciprocal	0.95122
sim_498	low purity	nonreciprocal	0.391393
sim_447	high purity	nonreciprocal	1
sim_139	high purity	nonreciprocal	0.95122
sim_318	low purity	nonreciprocal	0.408759
sim_494	high purity	reciprocal balanced	0.886598
sim_460	high purity	nonreciprocal	0.95122
sim_350	high purity	nonreciprocal	0.926531
sim_426	high purity	reciprocal balanced	0.714286
sim_354	high purity	nonreciprocal	0.941057
sim_396	high purity	nonreciprocal	0.988439
sim_21	high purity	nonreciprocal	0.966851
sim_51	high purity	nonreciprocal	0.978102
sim_34	high purity	nonreciprocal	0.96831
sim_209	high purity	nonreciprocal	0.936364
sim_165	high purity	nonreciprocal	0.983333
sim_22	low purity	nonreciprocal	0.631579
sim_494	high purity	reciprocal unbalanced	0.914894
sim_400	high purity	nonreciprocal	0.884615
sim_1	high purity	nonreciprocal	0.95122
sim_426	high purity	nonreciprocal	0.913665
sim_260	high purity	nonreciprocal	0.953917
sim_301	high purity	nonreciprocal	0.939904
sim_7	high purity	nonreciprocal	0.976109
sim_6	high purity	nonreciprocal	0.952381
sim_350	high purity	reciprocal balanced	0.642857
sim_145	high purity	nonreciprocal	0.828299
sim_13	low purity	nonreciprocal	0.309133
sim_441	high purity	nonreciprocal	0.964158
sim_329	high purity	nonreciprocal	0.95122
sim_65	high purity	nonreciprocal	0.964286
sim_456	high purity	nonreciprocal	0.677019
sim_147	high purity	nonreciprocal	0.985294
sim_85	high purity	nonreciprocal	0.963173
sim_121	low purity	nonreciprocal	0.560554
sim_450	high purity	nonreciprocal	0.942047
sim_452	high purity	nonreciprocal	0.925781
sim_218	high purity	nonreciprocal	0.966346
sim_284	high purity	reciprocal balanced	0.788462
sim_461	high purity	nonreciprocal	0.922581
sim_32	low purity	nonreciprocal	0.389113
sim_324	high purity	nonreciprocal	0.963415
sim_295	high purity	nonreciprocal	0.984962
sim_183	low purity	nonreciprocal	0.91771
sim_248	high purity	nonreciprocal	1
sim_156	high purity	nonreciprocal	0.910112
sim_214	high purity	nonreciprocal	0.939286
sim_265	high purity	nonreciprocal	0.954545
sim_101	high purity	reciprocal balanced	0.857143
sim_203	high purity	reciprocal unbalanced	0.25
sim_203	high purity	reciprocal balanced	0.68
sim_115	high purity	nonreciprocal	0.97561
sim_126	high purity	reciprocal unbalanced	0.571429
sim_14	high purity	nonreciprocal	0.963636
sim_375	high purity	nonreciprocal	0.973602
sim_466	high purity	nonreciprocal	0.947436
sim_454	low purity	nonreciprocal	0.610278
sim_190	high purity	nonreciprocal	0.913462
sim_476	high purity	nonreciprocal	0.966387
sim_288	high purity	nonreciprocal	0.948967
sim_366	high purity	nonreciprocal	0.95843
sim_364	high purity	nonreciprocal	0.944444
sim_271	high purity	nonreciprocal	0.92589
sim_472	high purity	nonreciprocal	0.956522
sim_355	high purity	nonreciprocal	0.987952
sim_330	high purity	nonreciprocal	1
sim_37	low purity	nonreciprocal	0.89547
sim_431	high purity	nonreciprocal	0.988095
sim_26	high purity	nonreciprocal	0.931271
sim_352	high purity	nonreciprocal	0.938776
sim_222	low purity	nonreciprocal	0.421622
sim_267	high purity	nonreciprocal	0.942724
sim_367	high purity	nonreciprocal	0.929231
sim_435	high purity	nonreciprocal	0.953405
sim_209	high purity	reciprocal balanced	0.744681
sim_315	low purity	nonreciprocal	0.238636
sim_148	high purity	reciprocal unbalanced	0.783784
sim_202	high purity	nonreciprocal	0.969072
sim_368	high purity	nonreciprocal	0.931818
sim_209	high purity	reciprocal unbalanced	0.913043
sim_135	high purity	nonreciprocal	0.92
sim_345	high purity	nonreciprocal	1
sim_269	high purity	nonreciprocal	0.942857
sim_283	low purity	nonreciprocal	0.772947
sim_338	high purity	nonreciprocal	0.981132
sim_316	high purity	nonreciprocal	0.967172
sim_20	low purity	nonreciprocal	0.905437
sim_356	low purity	nonreciprocal	0.765957
sim_299	high purity	nonreciprocal	0.910448
sim_81	high purity	nonreciprocal	0.864198
sim_465	high purity	nonreciprocal	0.945205
sim_358	low purity	nonreciprocal	0.791667
sim_149	low purity	nonreciprocal	0.8
sim_127	high purity	nonreciprocal	0.977778
sim_234	high purity	nonreciprocal	0.948077
sim_115	high purity	reciprocal balanced	0.866667
sim_174	low purity	reciprocal unbalanced	0.852632
sim_473	low purity	reciprocal unbalanced	0.775
sim_309	high purity	nonreciprocal	0.950156
sim_401	high purity	nonreciprocal	0.963415
sim_414	low purity	nonreciprocal	0.756579
sim_483	high purity	nonreciprocal	0.975155
sim_448	high purity	nonreciprocal	1
sim_413	high purity	nonreciprocal	0.976879
sim_228	high purity	nonreciprocal	0.942446
sim_497	low purity	nonreciprocal	0.92126
sim_461	high purity	reciprocal unbalanced	0.88
sim_453	high purity	nonreciprocal	0.934579
sim_178	high purity	nonreciprocal	0.962687
sim_461	high purity	reciprocal balanced	0.933333
sim_374	low purity	nonreciprocal	0.439628
sim_455	high purity	nonreciprocal	0.952941
sim_294	high purity	nonreciprocal	0.955414
sim_70	low purity	nonreciprocal	0.823834
sim_160	low purity	nonreciprocal	0.586667
sim_310	high purity	nonreciprocal	0.939908
sim_446	low purity	nonreciprocal	0.765625
sim_346	low purity	nonreciprocal	0.472527
sim_439	high purity	nonreciprocal	0.940568
sim_117	high purity	nonreciprocal	1
sim_303	low purity	nonreciprocal	0.921053
sim_97	high purity	nonreciprocal	0.953488
sim_82	high purity	nonreciprocal	1
sim_15	low purity	nonreciprocal	0.511194
sim_298	high purity	nonreciprocal	0.952555
sim_104	high purity	nonreciprocal	0.966102
sim_367	high purity	reciprocal unbalanced	0.733333
sim_458	high purity	nonreciprocal	0.97973
sim_412	high purity	reciprocal balanced	1
sim_210	high purity	nonreciprocal	0.978528
sim_159	low purity	nonreciprocal	0.00429185
sim_280	high purity	nonreciprocal	0.864865
sim_145	high purity	reciprocal balanced	0.82
sim_477	high purity	nonreciprocal	0.926017
sim_424	high purity	nonreciprocal	0.994186
sim_136	high purity	nonreciprocal	0.916376
sim_496	high purity	nonreciprocal	1
sim_335	low purity	nonreciprocal	0.850932
sim_31	high purity	nonreciprocal	0.988722
sim_208	high purity	nonreciprocal	0.952055
sim_382	high purity	nonreciprocal	0.918951
sim_392	high purity	nonreciprocal	0.947368
sim_413	high purity	reciprocal balanced	0.666667
sim_411	high purity	reciprocal unbalanced	0.727273
sim_40	high purity	nonreciprocal	0.941176
sim_471	high purity	nonreciprocal	0.956522
sim_318	low purity	reciprocal balanced	0
sim_379	high purity	reciprocal balanced	0.8
sim_434	high purity	nonreciprocal	0.933735
sim_167	high purity	nonreciprocal	0.945455
sim_429	high purity	nonreciprocal	0.941176
sim_5	low purity	reciprocal balanced	0.375
sim_275	high purity	nonreciprocal	1
sim_326	low purity	nonreciprocal	0.40099
sim_255	low purity	nonreciprocal	0
sim_251	high purity	nonreciprocal	0.875776
sim_298	high purity	reciprocal balanced	0.923077
sim_62	low purity	nonreciprocal	0.535714
sim_340	high purity	nonreciprocal	0.944444
sim_75	high purity	reciprocal unbalanced	0.863636
sim_19	low purity	nonreciprocal	0.377083
sim_216	high purity	nonreciprocal	0.914286
sim_131	high purity	nonreciprocal	0.966667
sim_310	high purity	reciprocal balanced	0.486486
sim_58	low purity	nonreciprocal	0.808354
sim_247	high purity	reciprocal unbalanced	0.789474
sim_183	low purity	reciprocal balanced	0.5
sim_482	high purity	nonreciprocal	0.904494
sim_88	high purity	nonreciprocal	0.950943
sim_210	high purity	reciprocal balanced	0.631579
sim_210	high purity	reciprocal unbalanced	0.875
sim_94	high purity	nonreciprocal	0.961207
sim_174	low purity	reciprocal balanced	0.745562
sim_341	high purity	nonreciprocal	0.914894
sim_25	high purity	nonreciprocal	0.946108
sim_409	high purity	nonreciprocal	1
sim_268	high purity	nonreciprocal	0.986207
sim_76	high purity	nonreciprocal	1
sim_380	low purity	nonreciprocal	0.91133
sim_476	high purity	reciprocal balanced	0.741935
sim_180	high purity	nonreciprocal	0.970149
sim_391	high purity	nonreciprocal	0.961039
sim_274	high purity	nonreciprocal	0.918367
sim_125	low purity	nonreciprocal	0.403226
sim_288	high purity	reciprocal balanced	0.75
sim_226	high purity	nonreciprocal	1
sim_241	high purity	nonreciprocal	0.971014
sim_173	low purity	nonreciprocal	0.941176
sim_77	low purity	nonreciprocal	1
sim_296	low purity	nonreciprocal	0.930168
sim_308	high purity	nonreciprocal	0.93617
sim_111	high purity	nonreciprocal	0.941176
sim_71	low purity	reciprocal balanced	0
sim_137	high purity	nonreciprocal	0.976923
sim_311	low purity	nonreciprocal	0.2
sim_105	high purity	nonreciprocal	1
sim_44	high purity	nonreciprocal	0.898305
sim_185	high purity	nonreciprocal	0.941176
sim_307	high purity	nonreciprocal	0.944444
sim_405	high purity	nonreciprocal	0.923077
sim_42	high purity	nonreciprocal	1
sim_195	low purity	nonreciprocal	0.529915
sim_30	low purity	nonreciprocal	0.221535
sim_325	high purity	nonreciprocal	0.945392
sim_237	high purity	nonreciprocal	0.920635
sim_404	high purity	nonreciprocal	1
sim_349	high purity	nonreciprocal	0.961373
sim_319	low purity	nonreciprocal	1
sim_488	high purity	nonreciprocal	0.895161
sim_114	low purity	nonreciprocal	0.898219
sim_288	high purity	reciprocal unbalanced	0.888889
sim_473	low purity	reciprocal balanced	0.722772
sim_388	low purity	nonreciprocal	0.35023
sim_479	high purity	nonreciprocal	0.900709
sim_451	low purity	nonreciprocal	0.927273
sim_51	high purity	reciprocal balanced	0.793103
sim_166	low purity	nonreciprocal	0.845238
sim_237	high purity	reciprocal balanced	0.777778
sim_386	high purity	nonreciprocal	1
sim_429	high purity	reciprocal balanced	0.782609
sim_95	high purity	nonreciprocal	0.877551
sim_442	high purity	nonreciprocal	0.989474
sim_223	high purity	nonreciprocal	0.948718
sim_10	high purity	nonreciprocal	0.848837
sim_91	low purity	nonreciprocal	0.901274
sim_89	high purity	nonreciprocal	1
sim_459	high purity	nonreciprocal	1
sim_39	low purity	reciprocal balanced	0.181818
sim_39	low purity	nonreciprocal	0.928571
sim_158	high purity	nonreciprocal	1
sim_363	low purity	nonreciprocal	0.125
sim_155	low purity	reciprocal unbalanced	0.76
sim_395	low purity	nonreciprocal	0.833616
sim_217	low purity	reciprocal balanced	0.166667
sim_270	low purity	nonreciprocal	0.976744
sim_109	high purity	reciprocal balanced	0.535714
sim_41	low purity	nonreciprocal	0.730769
sim_207	high purity	nonreciprocal	0.93038
sim_395	low purity	reciprocal unbalanced	0.847458
sim_290	low purity	nonreciprocal	0.600823
sim_221	high purity	nonreciprocal	0.937173
sim_305	high purity	nonreciprocal	0.975
sim_75	high purity	reciprocal balanced	0.666667
sim_250	high purity	nonreciprocal	1
sim_426	high purity	reciprocal unbalanced	0.701754
sim_224	high purity	nonreciprocal	1
sim_366	high purity	reciprocal balanced	0.657143
sim_126	high purity	nonreciprocal	0.946667
sim_438	high purity	nonreciprocal	1
sim_138	high purity	nonreciprocal	0.952073
sim_438	high purity	reciprocal balanced	1
sim_78	low purity	reciprocal balanced	0.630252
sim_443	low purity	nonreciprocal	0.227273
sim_381	low purity	nonreciprocal	0.192308
sim_97	high purity	reciprocal balanced	0.703125
sim_246	high purity	nonreciprocal	1
sim_8	high purity	nonreciprocal	0.946154
sim_382	high purity	reciprocal balanced	0.87963
sim_201	high purity	nonreciprocal	0.932836
sim_336	high purity	nonreciprocal	0.925743
sim_63	high purity	nonreciprocal	1
sim_353	high purity	nonreciprocal	0.972603
sim_116	high purity	nonreciprocal	0.886364
sim_88	high purity	reciprocal unbalanced	0.666667
sim_417	low purity	nonreciprocal	0.889262
sim_72	high purity	nonreciprocal	0.891304
sim_168	low purity	nonreciprocal	0.934579
sim_129	high purity	reciprocal balanced	0.73913
sim_24	high purity	reciprocal balanced	0.740741
sim_406	high purity	nonreciprocal	0.936709
sim_303	low purity	reciprocal unbalanced	0.6
sim_378	low purity	nonreciprocal	0.608108
sim_445	high purity	nonreciprocal	0.876471
sim_124	high purity	reciprocal balanced	0.571429
sim_389	low purity	reciprocal balanced	0.375
sim_59	high purity	nonreciprocal	0.987805
sim_347	high purity	nonreciprocal	0.9348
sim_225	high purity	nonreciprocal	0.917051
sim_227	high purity	nonreciprocal	0.95
sim_146	high purity	nonreciprocal	1
sim_440	high purity	nonreciprocal	0.941406
sim_301	high purity	reciprocal balanced	0.55814
sim_66	high purity	nonreciprocal	0.96
sim_359	high purity	nonreciprocal	0.944444
sim_285	high purity	nonreciprocal	1
sim_484	low purity	nonreciprocal	0.722222
sim_325	high purity	reciprocal balanced	0.611111
sim_243	high purity	nonreciprocal	0.92562
sim_86	high purity	nonreciprocal	0.978417
sim_453	high purity	reciprocal balanced	0.814815
sim_499	high purity	reciprocal balanced	0.714286
sim_395	low purity	reciprocal balanced	0.731884
sim_188	high purity	nonreciprocal	0.950413
sim_481	low purity	nonreciprocal	0.889764
sim_499	high purity	nonreciprocal	0.957895
sim_171	high purity	nonreciprocal	1
sim_254	high purity	nonreciprocal	0.983333
sim_1	high purity	reciprocal balanced	0.939394
sim_109	high purity	nonreciprocal	0.977477
sim_230	high purity	nonreciprocal	0.934783
sim_403	high purity	nonreciprocal	0.99
sim_132	high purity	reciprocal unbalanced	1
sim_300	high purity	nonreciprocal	0.894737
sim_47	low purity	nonreciprocal	0.471698
sim_251	high purity	reciprocal balanced	0.815789
sim_340	high purity	reciprocal balanced	0.727273
sim_343	high purity	nonreciprocal	1
sim_332	high purity	nonreciprocal	0.985714
sim_446	low purity	reciprocal unbalanced	0.75
sim_215	low purity	nonreciprocal	0.925926
sim_92	high purity	nonreciprocal	0.964912
sim_487	high purity	nonreciprocal	0.969697
sim_302	high purity	nonreciprocal	0.983051
sim_3	high purity	nonreciprocal	0.9375
sim_279	high purity	nonreciprocal	0.94382
sim_495	low purity	nonreciprocal	0.777778
sim_78	low purity	reciprocal unbalanced	0.810811
sim_231	high purity	nonreciprocal	0.992806
sim_60	high purity	nonreciprocal	0.967742
sim_99	high purity	nonreciprocal	0.971014
sim_20	low purity	reciprocal balanced	0.685714
sim_464	high purity	nonreciprocal	1
sim_102	high purity	reciprocal unbalanced	1
sim_102	high purity	reciprocal balanced	1
sim_102	high purity	nonreciprocal	0.914286
sim_109	high purity	reciprocal unbalanced	1
sim_220	high purity	nonreciprocal	1
sim_176	high purity	reciprocal unbalanced	0.6
sim_176	high purity	reciprocal balanced	0.6
sim_136	high purity	reciprocal balanced	0.666667
sim_476	high purity	reciprocal unbalanced	0.714286
sim_467	high purity	reciprocal balanced	0.789474
sim_57	low purity	nonreciprocal	0.163265
sim_191	high purity	nonreciprocal	0.947826
sim_191	high purity	reciprocal balanced	0.9375
sim_421	high purity	reciprocal balanced	1
sim_70	low purity	reciprocal balanced	0.518519
sim_398	high purity	nonreciprocal	1
sim_245	low purity	nonreciprocal	0.728261
sim_432	low purity	reciprocal balanced	0.25
sim_467	high purity	nonreciprocal	0.974138
sim_331	high purity	nonreciprocal	0.981595
sim_316	high purity	reciprocal balanced	0.8
sim_399	high purity	nonreciprocal	0.965368
sim_357	high purity	nonreciprocal	1
sim_84	high purity	nonreciprocal	0.968153
sim_12	high purity	nonreciprocal	1
sim_446	low purity	reciprocal balanced	0.384615
sim_402	low purity	nonreciprocal	0.795455
sim_321	low purity	nonreciprocal	0.707317
sim_283	low purity	reciprocal balanced	0.909091
sim_83	high purity	nonreciprocal	0.833333
sim_64	high purity	reciprocal balanced	0.596774
sim_98	low purity	nonreciprocal	0.886364
sim_450	high purity	reciprocal balanced	0.843478
sim_415	high purity	nonreciprocal	0.947368
sim_351	high purity	nonreciprocal	0.905172
sim_100	high purity	reciprocal balanced	0
sim_342	high purity	nonreciprocal	1
sim_422	high purity	nonreciprocal	1
sim_290	low purity	reciprocal balanced	0.125
sim_434	high purity	reciprocal balanced	0.75
sim_373	high purity	nonreciprocal	0.967742
sim_145	high purity	reciprocal unbalanced	0.941176
sim_33	high purity	reciprocal unbalanced	1
sim_33	high purity	reciprocal balanced	0.666667
sim_33	high purity	nonreciprocal	0.970588
sim_383	low purity	nonreciprocal	0.151515
sim_36	high purity	nonreciprocal	0.961538
sim_340	high purity	reciprocal unbalanced	0.666667
sim_265	high purity	reciprocal balanced	0.833333
sim_32	low purity	reciprocal balanced	0.105263
sim_32	low purity	reciprocal unbalanced	0.25
sim_299	high purity	reciprocal balanced	0.6
sim_81	high purity	reciprocal balanced	1
sim_153	low purity	nonreciprocal	0.476744
sim_350	high purity	reciprocal unbalanced	0.75
sim_244	low purity	reciprocal balanced	0
sim_375	high purity	reciprocal unbalanced	0.916667
sim_254	high purity	reciprocal balanced	0.5
sim_228	high purity	reciprocal balanced	0.864865
sim_65	high purity	reciprocal balanced	0.307692
sim_244	low purity	nonreciprocal	0.764706
sim_235	high purity	nonreciprocal	0.660494
sim_267	high purity	reciprocal balanced	0.743902
sim_27	high purity	nonreciprocal	0.944056
sim_68	high purity	nonreciprocal	0.8625
sim_287	low purity	nonreciprocal	0.857143
sim_276	high purity	nonreciprocal	0.935065
sim_259	high purity	nonreciprocal	1
sim_445	high purity	reciprocal balanced	1
sim_194	high purity	nonreciprocal	1
sim_181	high purity	nonreciprocal	0.971429
sim_314	high purity	nonreciprocal	1
sim_472	high purity	reciprocal balanced	0.583333
sim_96	low purity	reciprocal balanced	0.652778
sim_308	high purity	reciprocal balanced	1
sim_264	high purity	nonreciprocal	0.946429
sim_378	low purity	reciprocal balanced	0.266667
sim_130	high purity	nonreciprocal	0.75
sim_433	high purity	nonreciprocal	0.958333
sim_160	low purity	reciprocal balanced	0.444444
sim_493	high purity	reciprocal balanced	0.7
sim_493	high purity	reciprocal unbalanced	0.815789
sim_235	high purity	reciprocal unbalanced	0.333333
sim_235	high purity	reciprocal balanced	0.666667
sim_367	high purity	reciprocal balanced	0.76
sim_144	high purity	reciprocal unbalanced	0.933333
sim_144	high purity	reciprocal balanced	0.897436
sim_489	low purity	nonreciprocal	0.227848
sim_262	high purity	nonreciprocal	0.974359
sim_148	high purity	reciprocal balanced	0.873016
sim_90	low purity	nonreciprocal	0.217391
sim_245	low purity	reciprocal balanced	0.740741
sim_245	low purity	reciprocal unbalanced	0.9
sim_232	high purity	nonreciprocal	0.978022
sim_158	high purity	reciprocal balanced	1
sim_49	high purity	reciprocal balanced	0.5
sim_472	high purity	reciprocal unbalanced	0.5
sim_419	high purity	nonreciprocal	1
sim_428	high purity	nonreciprocal	0.916667
sim_428	high purity	reciprocal balanced	0.875
sim_272	high purity	nonreciprocal	0.926471
sim_236	high purity	reciprocal balanced	0.636364
sim_450	high purity	reciprocal unbalanced	0.891892
sim_217	low purity	nonreciprocal	0.763006
sim_37	low purity	reciprocal balanced	0.451613
sim_147	high purity	reciprocal balanced	0.833333
sim_241	high purity	reciprocal balanced	0.555556
sim_393	high purity	nonreciprocal	0.917808
sim_227	high purity	reciprocal balanced	0.428571
sim_190	high purity	reciprocal balanced	0.615385
sim_52	low purity	nonreciprocal	0.82
sim_4	high purity	nonreciprocal	0.90566
sim_390	high purity	nonreciprocal	1
sim_236	high purity	nonreciprocal	0.974576
sim_468	low purity	nonreciprocal	0.486111
sim_327	high purity	reciprocal balanced	1
sim_119	high purity	nonreciprocal	0.958333
sim_237	high purity	reciprocal unbalanced	0.833333
sim_396	high purity	reciprocal balanced	0.724138
sim_376	high purity	nonreciprocal	1
sim_328	low purity	nonreciprocal	0.956522
sim_401	high purity	reciprocal unbalanced	0.833333
sim_361	high purity	reciprocal unbalanced	0.833333
sim_306	high purity	nonreciprocal	0.958333
sim_182	high purity	nonreciprocal	1
sim_304	high purity	nonreciprocal	1
sim_196	high purity	nonreciprocal	0.931034
sim_291	low purity	nonreciprocal	1
sim_324	high purity	reciprocal balanced	0.25
sim_326	low purity	reciprocal balanced	0.4
sim_119	high purity	reciprocal balanced	0.875
sim_119	high purity	reciprocal unbalanced	0.75
sim_101	high purity	reciprocal unbalanced	0.913043
sim_416	high purity	reciprocal unbalanced	0.714286
sim_347	high purity	reciprocal balanced	0.881944
sim_388	low purity	reciprocal balanced	0.35
sim_53	high purity	nonreciprocal	1
sim_312	high purity	reciprocal balanced	0.285714
sim_186	high purity	nonreciprocal	0.93401
sim_142	low purity	reciprocal balanced	0.285714
sim_369	high purity	nonreciprocal	1
sim_375	high purity	reciprocal balanced	0.633333
sim_240	high purity	nonreciprocal	0.878788
sim_249	low purity	nonreciprocal	0.5
sim_223	high purity	reciprocal unbalanced	0.666667
sim_469	high purity	nonreciprocal	1
sim_133	low purity	nonreciprocal	0.303279
sim_223	high purity	reciprocal balanced	0.625
sim_449	low purity	nonreciprocal	0.684211
sim_110	high purity	nonreciprocal	0.764706
sim_38	high purity	nonreciprocal	1
sim_379	high purity	reciprocal unbalanced	0.8
sim_409	high purity	reciprocal balanced	1
sim_409	high purity	reciprocal unbalanced	1
sim_140	high purity	nonreciprocal	1
sim_257	low purity	nonreciprocal	1
sim_152	high purity	nonreciprocal	0.833333
sim_403	high purity	reciprocal balanced	1
sim_205	low purity	nonreciprocal	0.714286
sim_79	high purity	reciprocal balanced	0.6875
sim_117	high purity	reciprocal balanced	0
sim_322	high purity	nonreciprocal	1
sim_5	low purity	nonreciprocal	0.292929
sim_95	high purity	reciprocal balanced	1
sim_199	high purity	nonreciprocal	0.97561
sim_261	low purity	reciprocal unbalanced	0.588235
sim_212	high purity	nonreciprocal	1
sim_284	high purity	reciprocal unbalanced	0.791667
sim_487	high purity	reciprocal balanced	0
sim_11	high purity	nonreciprocal	1
sim_390	high purity	reciprocal balanced	0.714286
sim_279	high purity	reciprocal balanced	0.166667
sim_271	high purity	reciprocal balanced	0.811594
sim_162	high purity	nonreciprocal	0.868421
sim_73	high purity	nonreciprocal	1
sim_264	high purity	reciprocal balanced	1
sim_167	high purity	reciprocal balanced	0.37931
sim_271	high purity	reciprocal unbalanced	0.878049
sim_71	low purity	nonreciprocal	0.8
sim_300	high purity	reciprocal balanced	0.9
sim_184	high purity	nonreciprocal	0.90625
sim_300	high purity	reciprocal unbalanced	0.5
sim_112	high purity	nonreciprocal	1
sim_491	high purity	nonreciprocal	0.9375
sim_29	low purity	nonreciprocal	0
sim_269	high purity	reciprocal balanced	0.814815
sim_410	low purity	nonreciprocal	0
sim_466	high purity	reciprocal unbalanced	0.869565
sim_252	high purity	nonreciprocal	1
sim_440	high purity	reciprocal balanced	0.75
sim_267	high purity	reciprocal unbalanced	0.923077
sim_485	high purity	reciprocal balanced	0.79661
sim_261	low purity	reciprocal balanced	0.571429
sim_249	low purity	reciprocal balanced	0.25
sim_249	low purity	reciprocal unbalanced	1
sim_339	high purity	nonreciprocal	1
sim_320	high purity	nonreciprocal	0.969697
sim_329	high purity	reciprocal balanced	0.846154
sim_443	low purity	reciprocal balanced	0.416667
sim_100	high purity	nonreciprocal	1
sim_46	high purity	nonreciprocal	1
sim_123	high purity	reciprocal unbalanced	0.5
sim_384	high purity	nonreciprocal	1
sim_125	low purity	reciprocal balanced	0.428571
sim_122	high purity	nonreciprocal	0.9
sim_382	high purity	reciprocal unbalanced	0.866667
sim_327	high purity	nonreciprocal	1
sim_70	low purity	reciprocal unbalanced	0.944444
sim_13	low purity	reciprocal unbalanced	0.583333
sim_168	low purity	reciprocal balanced	1
sim_163	low purity	nonreciprocal	1
sim_197	high purity	nonreciprocal	0.859375
sim_106	low purity	nonreciprocal	0
sim_64	high purity	reciprocal unbalanced	0.805556
sim_310	high purity	reciprocal unbalanced	0.769231
sim_427	high purity	nonreciprocal	1
sim_16	high purity	reciprocal balanced	0.5
sim_323	high purity	nonreciprocal	0.957746
sim_392	high purity	reciprocal balanced	0.25
sim_441	high purity	reciprocal balanced	0.913043
sim_374	low purity	reciprocal balanced	0.3125
sim_204	high purity	nonreciprocal	1
sim_353	high purity	reciprocal balanced	0.714286
sim_401	high purity	reciprocal balanced	0.727273
sim_193	high purity	nonreciprocal	1
sim_411	high purity	reciprocal balanced	0.666667
sim_454	low purity	reciprocal balanced	0.3125
sim_323	high purity	reciprocal balanced	0.894737
sim_323	high purity	reciprocal unbalanced	1
sim_385	high purity	nonreciprocal	1
sim_301	high purity	reciprocal unbalanced	0.692308
sim_97	high purity	reciprocal unbalanced	0.903226
sim_188	high purity	reciprocal balanced	1
sim_234	high purity	reciprocal balanced	0.795455
sim_47	low purity	reciprocal balanced	0.5
sim_475	high purity	nonreciprocal	1
sim_466	high purity	reciprocal balanced	0.666667
sim_293	high purity	nonreciprocal	0.125
sim_440	high purity	reciprocal unbalanced	0.6
sim_296	low purity	reciprocal balanced	0.318182
sim_268	high purity	reciprocal balanced	1
sim_227	high purity	reciprocal unbalanced	1
sim_133	low purity	reciprocal balanced	0.352113
sim_239	low purity	nonreciprocal	0.142857
sim_362	high purity	nonreciprocal	1
sim_498	low purity	reciprocal balanced	0.385965
sim_436	high purity	nonreciprocal	1
sim_34	high purity	reciprocal balanced	0.730769
sim_34	high purity	reciprocal unbalanced	0.857143
sim_238	high purity	reciprocal unbalanced	0.916667
sim_238	high purity	reciprocal balanced	0.821918
sim_85	high purity	reciprocal balanced	0.791667
sim_85	high purity	reciprocal unbalanced	0.857143
sim_177	high purity	nonreciprocal	1
sim_465	high purity	reciprocal balanced	0.5
sim_331	high purity	reciprocal balanced	0.857143
sim_159	low purity	reciprocal balanced	0
sim_187	high purity	nonreciprocal	1
sim_18	high purity	nonreciprocal	0.833333
sim_490	low purity	nonreciprocal	0.0357143
sim_2	high purity	nonreciprocal	0.0769231
sim_190	high purity	reciprocal unbalanced	0.6
sim_303	low purity	reciprocal balanced	0.526316
sim_478	high purity	nonreciprocal	1
sim_103	high purity	nonreciprocal	0.967742
sim_24	high purity	reciprocal unbalanced	0.846154
sim_348	high purity	reciprocal unbalanced	0.75
sim_348	high purity	reciprocal balanced	0.428571
sim_282	low purity	nonreciprocal	0.782609
sim_377	high purity	reciprocal balanced	0.774194
sim_201	high purity	reciprocal balanced	0.905797
sim_201	high purity	reciprocal unbalanced	0.928571
sim_157	high purity	nonreciprocal	1
sim_185	high purity	reciprocal balanced	0.142857
sim_185	high purity	reciprocal unbalanced	0
sim_380	low purity	reciprocal unbalanced	0.571429
sim_444	high purity	nonreciprocal	0.972973
sim_287	low purity	reciprocal balanced	1
sim_120	high purity	nonreciprocal	1
sim_308	high purity	reciprocal unbalanced	1
sim_133	low purity	reciprocal unbalanced	0.3125
sim_23	high purity	nonreciprocal	0.96875
sim_297	high purity	nonreciprocal	1
sim_30	low purity	reciprocal unbalanced	0.375
sim_281	high purity	nonreciprocal	0.923077
sim_491	high purity	reciprocal unbalanced	1
sim_491	high purity	reciprocal balanced	0.75
sim_30	low purity	reciprocal balanced	0.416667
sim_58	low purity	reciprocal balanced	0.652174
sim_9	high purity	nonreciprocal	0.970588
sim_316	high purity	reciprocal unbalanced	1
sim_295	high purity	reciprocal unbalanced	1
sim_295	high purity	reciprocal balanced	0.583333
sim_265	high purity	reciprocal unbalanced	1
sim_79	high purity	reciprocal unbalanced	0.666667
sim_47	low purity	reciprocal unbalanced	0
sim_457	high purity	reciprocal unbalanced	0.5
sim_28	low purity	nonreciprocal	0
sim_423	high purity	nonreciprocal	1
sim_442	high purity	reciprocal balanced	1
sim_442	high purity	reciprocal unbalanced	1
sim_60	high purity	reciprocal balanced	0.5
sim_389	low purity	reciprocal unbalanced	0.666667
sim_60	high purity	reciprocal unbalanced	0.5
sim_258	high purity	nonreciprocal	1
sim_454	low purity	reciprocal unbalanced	0.384615
sim_221	high purity	reciprocal balanced	0.48
sim_211	high purity	nonreciprocal	1
sim_146	high purity	reciprocal balanced	1
sim_169	high purity	nonreciprocal	1
sim_45	high purity	nonreciprocal	0.824561
sim_56	low purity	nonreciprocal	0
sim_439	high purity	reciprocal balanced	0.466667
sim_500	high purity	nonreciprocal	1
sim_349	high purity	reciprocal balanced	0.428571
sim_183	low purity	reciprocal unbalanced	0.666667
sim_388	low purity	reciprocal unbalanced	0.25
sim_361	high purity	reciprocal balanced	0.516129
sim_413	high purity	reciprocal unbalanced	1
sim_80	low purity	nonreciprocal	0
sim_424	high purity	reciprocal balanced	1
sim_260	high purity	reciprocal balanced	0.84
sim_477	high purity	reciprocal balanced	0.725
sim_477	high purity	reciprocal unbalanced	0.7
sim_414	low purity	reciprocal balanced	0.4
sim_121	low purity	reciprocal balanced	0.56
sim_414	low purity	reciprocal unbalanced	0.75
sim_212	high purity	reciprocal balanced	0
sim_407	low purity	nonreciprocal	0.806452
sim_184	high purity	reciprocal balanced	0.5
sim_184	high purity	reciprocal unbalanced	1
sim_166	low purity	reciprocal balanced	1
sim_82	high purity	reciprocal balanced	0
sim_69	high purity	nonreciprocal	0.956522
sim_243	high purity	reciprocal balanced	0.5
sim_333	low purity	nonreciprocal	0.344828
sim_479	high purity	reciprocal balanced	0
sim_186	high purity	reciprocal unbalanced	1
sim_186	high purity	reciprocal balanced	0.867925
sim_283	low purity	reciprocal unbalanced	1
sim_61	high purity	reciprocal balanced	1
sim_159	low purity	reciprocal unbalanced	0
sim_195	low purity	reciprocal balanced	0.625
sim_234	high purity	reciprocal unbalanced	0.6
sim_251	high purity	reciprocal unbalanced	1
sim_225	high purity	reciprocal unbalanced	0.666667
sim_418	high purity	nonreciprocal	1
sim_335	low purity	reciprocal balanced	1
sim_17	high purity	reciprocal balanced	1
sim_349	high purity	reciprocal unbalanced	1
sim_229	low purity	nonreciprocal	0.6
sim_352	high purity	reciprocal unbalanced	0.75
sim_352	high purity	reciprocal balanced	0.692308
sim_435	high purity	reciprocal unbalanced	0.833333
sim_435	high purity	reciprocal balanced	0.923077
sim_21	high purity	reciprocal balanced	0.941176
sim_480	low purity	reciprocal balanced	0.444444
sim_38	high purity	reciprocal balanced	0.333333
sim_21	high purity	reciprocal unbalanced	1
sim_406	high purity	reciprocal balanced	0.6
sim_4	high purity	reciprocal balanced	0.5
sim_452	high purity	reciprocal balanced	0.8
sim_118	high purity	nonreciprocal	0.934783
sim_31	high purity	reciprocal balanced	0.789474
sim_219	low purity	nonreciprocal	0
sim_1	high purity	reciprocal unbalanced	0.916667
sim_7	high purity	reciprocal balanced	0.764706
sim_460	high purity	reciprocal unbalanced	0.75
sim_460	high purity	reciprocal balanced	0.928571
sim_22	low purity	reciprocal balanced	0.166667
sim_199	high purity	reciprocal balanced	0
sim_278	high purity	nonreciprocal	0.966667
sim_74	high purity	reciprocal balanced	0.8
sim_253	high purity	nonreciprocal	1
sim_9	high purity	reciprocal balanced	0
sim_126	high purity	reciprocal balanced	0.785714
sim_192	high purity	nonreciprocal	0.9375
sim_497	low purity	reciprocal unbalanced	1
sim_484	low purity	reciprocal balanced	0.692308
sim_225	high purity	reciprocal balanced	0.333333
sim_54	high purity	nonreciprocal	0.705882
sim_110	high purity	reciprocal balanced	1
sim_152	high purity	reciprocal unbalanced	1
sim_152	high purity	reciprocal balanced	1
sim_188	high purity	reciprocal unbalanced	1
sim_325	high purity	reciprocal unbalanced	0.777778
sim_45	high purity	reciprocal unbalanced	1
sim_347	high purity	reciprocal unbalanced	0.878378
sim_346	low purity	reciprocal balanced	0.230769
sim_256	low purity	nonreciprocal	0.0555556
sim_214	high purity	reciprocal balanced	0.9
sim_492	high purity	nonreciprocal	1
sim_358	low purity	reciprocal balanced	1
sim_231	high purity	reciprocal balanced	0.7
sim_387	low purity	nonreciprocal	0
sim_10	high purity	reciprocal balanced	1
sim_246	high purity	reciprocal balanced	0
sim_138	high purity	reciprocal unbalanced	0.973684
sim_138	high purity	reciprocal balanced	0.830986
sim_425	high purity	nonreciprocal	1
sim_45	high purity	reciprocal balanced	0.571429
sim_175	high purity	nonreciprocal	1
sim_91	low purity	reciprocal balanced	0.714286
sim_289	high purity	nonreciprocal	0.6
sim_417	low purity	reciprocal balanced	0.769231
sim_344	high purity	nonreciprocal	1
sim_419	high purity	reciprocal unbalanced	1
sim_419	high purity	reciprocal balanced	1
sim_94	high purity	reciprocal balanced	0.714286
sim_127	high purity	reciprocal balanced	0.909091
sim_277	high purity	reciprocal balanced	1
sim_354	high purity	reciprocal balanced	0.76
sim_127	high purity	reciprocal unbalanced	0.857143
sim_179	low purity	nonreciprocal	0
sim_264	high purity	reciprocal unbalanced	1
sim_124	high purity	reciprocal unbalanced	1
sim_296	low purity	reciprocal unbalanced	0.5
sim_313	high purity	nonreciprocal	1
sim_498	low purity	reciprocal unbalanced	0.583333
sim_351	high purity	reciprocal balanced	0.428571
sim_88	high purity	reciprocal balanced	0.722222
sim_135	high purity	reciprocal balanced	1
sim_369	high purity	reciprocal balanced	1
sim_343	high purity	reciprocal balanced	1
sim_262	high purity	reciprocal balanced	1
sim_256	low purity	reciprocal balanced	0
sim_256	low purity	reciprocal unbalanced	0
sim_141	high purity	nonreciprocal	1
sim_380	low purity	reciprocal balanced	0.533333
sim_16	high purity	reciprocal unbalanced	0.75
sim_302	high purity	reciprocal balanced	1
sim_59	high purity	reciprocal balanced	0.95
sim_59	high purity	reciprocal unbalanced	1
sim_68	high purity	reciprocal balanced	0.833333
sim_482	high purity	reciprocal balanced	0.5
sim_482	high purity	reciprocal unbalanced	1
sim_15	low purity	reciprocal balanced	0.4
sim_430	high purity	nonreciprocal	0.8
sim_171	high purity	reciprocal balanced	1
sim_483	high purity	reciprocal balanced	0.454545
sim_309	high purity	reciprocal balanced	0.705882
sim_114	low purity	reciprocal unbalanced	0.9
sim_485	high purity	reciprocal unbalanced	0.857143
sim_170	low purity	reciprocal balanced	0
sim_68	high purity	reciprocal unbalanced	1
sim_469	high purity	reciprocal balanced	0.636364
sim_429	high purity	reciprocal unbalanced	0.818182
sim_452	high purity	reciprocal unbalanced	0.952381
sim_488	high purity	reciprocal unbalanced	0.5
sim_290	low purity	reciprocal unbalanced	0.5
sim_258	high purity	reciprocal balanced	1
sim_5	low purity	reciprocal unbalanced	0.666667
sim_153	low purity	reciprocal balanced	0.7
sim_137	high purity	reciprocal balanced	0.25
sim_488	high purity	reciprocal balanced	0.6
sim_114	low purity	reciprocal balanced	0.84
sim_321	low purity	reciprocal balanced	1
sim_335	low purity	reciprocal unbalanced	1
sim_191	high purity	reciprocal unbalanced	0.8
sim_74	high purity	reciprocal unbalanced	1
sim_92	high purity	reciprocal balanced	1
sim_396	high purity	reciprocal unbalanced	1
sim_153	low purity	reciprocal unbalanced	0.714286
sim_51	high purity	reciprocal unbalanced	0.818182
sim_337	high purity	nonreciprocal	1
sim_368	high purity	reciprocal balanced	0.833333
sim_368	high purity	reciprocal unbalanced	0.8
sim_48	high purity	nonreciprocal	1
sim_248	high purity	reciprocal balanced	1
sim_19	low purity	reciprocal unbalanced	0.5
sim_103	high purity	reciprocal balanced	1
sim_108	high purity	nonreciprocal	0.5
sim_91	low purity	reciprocal unbalanced	1
sim_161	high purity	nonreciprocal	1
sim_204	high purity	reciprocal balanced	1
sim_204	high purity	reciprocal unbalanced	1
sim_406	high purity	reciprocal unbalanced	1
sim_241	high purity	reciprocal unbalanced	0.583333
sim_364	high purity	reciprocal balanced	1
sim_230	high purity	reciprocal balanced	0.65
sim_230	high purity	reciprocal unbalanced	0.818182
sim_364	high purity	reciprocal unbalanced	1
sim_471	high purity	reciprocal balanced	0.375
sim_53	high purity	reciprocal balanced	1
sim_292	high purity	nonreciprocal	1
sim_37	low purity	reciprocal unbalanced	0.666667
sim_365	high purity	nonreciprocal	1
sim_57	low purity	reciprocal balanced	0.5
sim_253	high purity	reciprocal balanced	1
sim_63	high purity	reciprocal balanced	0.5
sim_402	low purity	reciprocal balanced	0.571429
sim_26	high purity	reciprocal balanced	0.625
sim_43	high purity	nonreciprocal	1
sim_99	high purity	reciprocal balanced	0.571429
sim_3	high purity	reciprocal balanced	1
sim_35	low purity	reciprocal balanced	0.266667
sim_330	high purity	reciprocal balanced	0.6
sim_96	low purity	reciprocal unbalanced	0.764706
sim_62	low purity	reciprocal balanced	0.6
sim_105	high purity	reciprocal balanced	1
sim_99	high purity	reciprocal unbalanced	0
sim_55	low purity	nonreciprocal	0
sim_407	low purity	reciprocal balanced	0
sim_257	low purity	reciprocal unbalanced	0.75
sim_408	high purity	nonreciprocal	1
sim_298	high purity	reciprocal unbalanced	0.888889
sim_128	low purity	nonreciprocal	0.379085
sim_353	high purity	reciprocal unbalanced	1
sim_439	high purity	reciprocal unbalanced	0.857143
sim_7	high purity	reciprocal unbalanced	0.75
sim_356	low purity	reciprocal balanced	0.25
sim_489	low purity	reciprocal balanced	0.333333
sim_6	high purity	reciprocal balanced	0.8
sim_468	low purity	reciprocal balanced	0.444444
sim_218	high purity	reciprocal balanced	0.666667
sim_162	high purity	reciprocal balanced	0.714286
sim_162	high purity	reciprocal unbalanced	1
sim_228	high purity	reciprocal unbalanced	0.8125
sim_55	low purity	reciprocal balanced	0
sim_370	low purity	nonreciprocal	0
sim_286	high purity	reciprocal balanced	1
sim_393	high purity	reciprocal balanced	1
sim_260	high purity	reciprocal unbalanced	0.75
sim_169	high purity	reciprocal balanced	1
sim_72	high purity	reciprocal balanced	0.5
sim_94	high purity	reciprocal unbalanced	1
sim_206	low purity	nonreciprocal	1
sim_200	high purity	nonreciprocal	1
sim_164	high purity	nonreciprocal	0.8
sim_19	low purity	reciprocal balanced	0.384615
sim_333	low purity	reciprocal balanced	0
sim_139	high purity	reciprocal balanced	0.75
sim_497	low purity	reciprocal balanced	0
sim_263	high purity	nonreciprocal	1
sim_25	high purity	reciprocal balanced	1
sim_27	high purity	reciprocal balanced	0.888889
sim_416	high purity	reciprocal balanced	0.533333
sim_393	high purity	reciprocal unbalanced	1
sim_27	high purity	reciprocal unbalanced	0.875
sim_66	high purity	reciprocal balanced	0.714286
sim_399	high purity	reciprocal balanced	1
sim_233	low purity	reciprocal unbalanced	0.583333
sim_274	high purity	reciprocal balanced	1
sim_304	high purity	reciprocal balanced	1
sim_457	high purity	reciprocal balanced	1
sim_115	high purity	reciprocal unbalanced	1
sim_331	high purity	reciprocal unbalanced	0.5
sim_434	high purity	reciprocal unbalanced	0.75
sim_62	low purity	reciprocal unbalanced	0.333333
sim_15	low purity	reciprocal unbalanced	0.571429
sim_123	high purity	reciprocal balanced	1
sim_50	high purity	nonreciprocal	1
sim_189	high purity	nonreciprocal	1
sim_121	low purity	reciprocal unbalanced	0.727273
sim_86	high purity	reciprocal balanced	0.947368
sim_456	high purity	reciprocal unbalanced	0.666667
sim_456	high purity	reciprocal balanced	0.8
sim_358	low purity	reciprocal unbalanced	0.5
sim_470	high purity	nonreciprocal	1
sim_14	high purity	reciprocal balanced	0.25
sim_14	high purity	reciprocal unbalanced	1
sim_405	high purity	reciprocal balanced	0.5
sim_129	high purity	reciprocal unbalanced	0.875
sim_483	high purity	reciprocal unbalanced	1
sim_35	low purity	reciprocal unbalanced	0.6
sim_266	high purity	nonreciprocal	1
sim_455	high purity	reciprocal balanced	0.666667
sim_167	high purity	reciprocal unbalanced	0.625
sim_341	high purity	reciprocal balanced	1
sim_216	high purity	reciprocal balanced	1
sim_216	high purity	reciprocal unbalanced	1
sim_113	high purity	nonreciprocal	1
sim_280	high purity	reciprocal balanced	0.142857
sim_334	low purity	nonreciprocal	0
sim_270	low purity	reciprocal balanced	0.333333
sim_122	high purity	reciprocal balanced	1
sim_420	low purity	nonreciprocal	0.916667
sim_242	high purity	reciprocal balanced	0
sim_214	high purity	reciprocal unbalanced	1
sim_77	low purity	reciprocal balanced	1
sim_407	low purity	reciprocal unbalanced	0
sim_351	high purity	reciprocal unbalanced	1
sim_383	low purity	reciprocal unbalanced	0
sim_383	low purity	reciprocal balanced	0
sim_431	high purity	reciprocal balanced	1
sim_128	low purity	reciprocal balanced	0.142857
sim_8	high purity	reciprocal balanced	1
sim_8	high purity	reciprocal unbalanced	1
sim_240	high purity	reciprocal balanced	0.625
sim_297	high purity	reciprocal balanced	1
sim_336	high purity	reciprocal balanced	0
sim_165	high purity	reciprocal balanced	1
sim_205	low purity	reciprocal balanced	0.5
sim_481	low purity	reciprocal balanced	1
sim_402	low purity	reciprocal unbalanced	1
sim_12	high purity	reciprocal balanced	1
sim_12	high purity	reciprocal unbalanced	1
sim_441	high purity	reciprocal unbalanced	0.833333
sim_84	high purity	reciprocal unbalanced	0.75
sim_84	high purity	reciprocal balanced	0.454545
sim_317	low purity	nonreciprocal	0
sim_52	low purity	reciprocal balanced	1
sim_242	high purity	nonreciprocal	1
sim_299	high purity	reciprocal unbalanced	1
sim_282	low purity	reciprocal balanced	0
sim_36	high purity	reciprocal balanced	0
sim_484	low purity	reciprocal unbalanced	0.5
sim_354	high purity	reciprocal unbalanced	1
sim_474	low purity	nonreciprocal	0
sim_315	low purity	reciprocal balanced	0.307692
sim_397	low purity	reciprocal balanced	1
sim_397	low purity	reciprocal unbalanced	0.75
sim_143	high purity	reciprocal unbalanced	1
sim_273	high purity	reciprocal balanced	1
sim_390	high purity	reciprocal unbalanced	1
sim_40	high purity	reciprocal balanced	0.5
sim_197	high purity	reciprocal balanced	0.888889
sim_197	high purity	reciprocal unbalanced	0.5
sim_207	high purity	reciprocal balanced	1
sim_131	high purity	reciprocal balanced	1
sim_294	high purity	reciprocal unbalanced	1
sim_391	high purity	reciprocal balanced	1
sim_332	high purity	reciprocal balanced	1
sim_458	high purity	reciprocal balanced	0
sim_221	high purity	reciprocal unbalanced	1
sim_302	high purity	reciprocal unbalanced	0.5
sim_312	high purity	reciprocal unbalanced	1
sim_200	high purity	reciprocal balanced	1
sim_107	high purity	nonreciprocal	1
sim_137	high purity	reciprocal unbalanced	0.75
sim_66	high purity	reciprocal unbalanced	1
sim_116	high purity	reciprocal balanced	1
sim_116	high purity	reciprocal unbalanced	1
sim_177	high purity	reciprocal balanced	1
sim_213	low purity	nonreciprocal	1
sim_136	high purity	reciprocal unbalanced	0.5
sim_86	high purity	reciprocal unbalanced	1
sim_307	high purity	reciprocal balanced	0.5
sim_307	high purity	reciprocal unbalanced	0
sim_339	high purity	reciprocal balanced	0.75
sim_394	low purity	nonreciprocal	1
sim_25	high purity	reciprocal unbalanced	1
sim_437	low purity	nonreciprocal	0
sim_92	high purity	reciprocal unbalanced	1
sim_280	high purity	reciprocal unbalanced	1
sim_236	high purity	reciprocal unbalanced	1
sim_463	high purity	reciprocal balanced	0
sim_481	low purity	reciprocal unbalanced	1
sim_339	high purity	reciprocal unbalanced	0.5
sim_453	high purity	reciprocal unbalanced	1
sim_268	high purity	reciprocal unbalanced	1
sim_278	high purity	reciprocal balanced	0.833333
sim_278	high purity	reciprocal unbalanced	1
sim_46	high purity	reciprocal balanced	1
sim_399	high purity	reciprocal unbalanced	0.8
sim_424	high purity	reciprocal unbalanced	1
sim_26	high purity	reciprocal unbalanced	0.5
sim_486	low purity	reciprocal balanced	0.923077
sim_400	high purity	reciprocal balanced	1
sim_198	high purity	nonreciprocal	1
sim_499	high purity	reciprocal unbalanced	1
sim_451	low purity	reciprocal balanced	1
sim_276	high purity	reciprocal balanced	1
sim_318	low purity	reciprocal unbalanced	0.5
sim_415	high purity	reciprocal unbalanced	1
sim_415	high purity	reciprocal balanced	1
sim_445	high purity	reciprocal unbalanced	0.5
sim_366	high purity	reciprocal unbalanced	0.333333
sim_128	low purity	reciprocal unbalanced	1
sim_218	high purity	reciprocal unbalanced	1
sim_328	low purity	reciprocal balanced	0
sim_328	low purity	reciprocal unbalanced	0
sim_309	high purity	reciprocal unbalanced	1
sim_9	high purity	reciprocal unbalanced	1
sim_112	high purity	reciprocal balanced	1
sim_431	high purity	reciprocal unbalanced	1
sim_374	low purity	reciprocal unbalanced	0
sim_294	high purity	reciprocal balanced	1
sim_151	high purity	nonreciprocal	1
sim_259	high purity	reciprocal balanced	0
sim_418	high purity	reciprocal balanced	1
sim_134	high purity	nonreciprocal	0.8
sim_471	high purity	reciprocal unbalanced	0
sim_93	high purity	nonreciprocal	1
sim_172	low purity	reciprocal balanced	1
sim_173	low purity	reciprocal balanced	0.857143
sim_232	high purity	reciprocal unbalanced	1
sim_232	high purity	reciprocal balanced	1
sim_202	high purity	reciprocal balanced	1
sim_44	high purity	reciprocal balanced	0
sim_444	high purity	reciprocal balanced	1
sim_202	high purity	reciprocal unbalanced	1
sim_65	high purity	reciprocal unbalanced	0.5
sim_455	high purity	reciprocal unbalanced	1
sim_173	low purity	reciprocal unbalanced	0.75
sim_486	low purity	reciprocal unbalanced	0.5
sim_371	high purity	nonreciprocal	1
sim_371	high purity	reciprocal balanced	1
sim_150	high purity	nonreciprocal	1
sim_143	high purity	reciprocal balanced	1
sim_154	high purity	nonreciprocal	1
sim_327	high purity	reciprocal unbalanced	1
sim_336	high purity	reciprocal unbalanced	1
sim_338	high purity	reciprocal balanced	1
sim_125	low purity	reciprocal unbalanced	0
sim_377	high purity	reciprocal unbalanced	1
sim_333	low purity	reciprocal unbalanced	0
sim_467	high purity	reciprocal unbalanced	1
sim_272	high purity	reciprocal balanced	1
sim_281	high purity	reciprocal balanced	1
sim_433	high purity	reciprocal balanced	1
sim_464	high purity	reciprocal unbalanced	1
sim_464	high purity	reciprocal balanced	1
sim_489	low purity	reciprocal unbalanced	0.444444
sim_104	high purity	reciprocal balanced	1
sim_385	high purity	reciprocal balanced	1
sim_425	high purity	reciprocal balanced	0
sim_425	high purity	reciprocal unbalanced	0
sim_262	high purity	reciprocal unbalanced	1
sim_279	high purity	reciprocal unbalanced	0.714286
sim_239	low purity	reciprocal balanced	0
sim_164	high purity	reciprocal balanced	0
sim_164	high purity	reciprocal unbalanced	0
sim_315	low purity	reciprocal unbalanced	0
sim_192	high purity	reciprocal balanced	0
sim_207	high purity	reciprocal unbalanced	0.5
sim_58	low purity	reciprocal unbalanced	1
sim_404	high purity	reciprocal balanced	0
sim_345	high purity	reciprocal balanced	0
sim_275	high purity	reciprocal balanced	1
