# Supplementary material for: Most large structural variants in cancer genomes can be detected without long reads
Source: Nat Genet. 2023 Nov 9;55(12):2139–48. doi: 10.1038/s41588-023-01540-6 (PMC10703688; doi:10.1038/s41588-023-01540-6)
Supplement: Supplementary file 11 — Statistical source data for Extended Data Fig. 5. [file 41588_2023_1540_MOESM11_ESM.xlsx]

## Sheet: 5A
bin	type	line	count	norm.factor	norm.n	x
19500	loose	other	5513	5556.2	0.992225	-19.5
19500	random	other	16844	16817.6	1.00157	-19.5
10500	random	other	16880	16817.6	1.00371	-10.5
18500	loose	other	5484	5556.2	0.987006	-18.5
18500	random	other	16772	16817.6	0.99729	-18.5
9500	random	other	16732	16817.6	0.994912	-9.5
17500	loose	other	5413	5556.2	0.974227	-17.5
17500	random	other	16869	16817.6	1.00306	-17.5
8500	random	other	16819	16817.6	1.00008	-8.5
16500	loose	other	5512	5556.2	0.992045	-16.5
16500	random	other	16837	16817.6	1.00116	-16.5
7500	random	other	16748	16817.6	0.995863	-7.5
15500	loose	other	5561	5556.2	1.00086	-15.5
15500	random	other	16935	16817.6	1.00698	-15.5
6500	random	other	16645	16817.6	0.989739	-6.5
14500	loose	other	5597	5556.2	1.00734	-14.5
24500	loose	other	5422	5556.2	0.975847	-24.5
14500	random	other	16756	16817.6	0.996339	-14.5
5500	random	other	16780	16817.6	0.997766	-5.5
13500	loose	other	5657	5556.2	1.01814	-13.5
23500	loose	other	5478	5556.2	0.985926	-23.5
13500	random	other	16771	16817.6	0.997231	-13.5
4500	random	other	16871	16817.6	1.00318	-4.5
12500	loose	other	5624	5556.2	1.0122	-12.5
22500	loose	other	5451	5556.2	0.981066	-22.5
12500	random	other	16787	16817.6	0.998182	-12.5
3500	random	other	16678	16817.6	0.991701	-3.5
11500	loose	other	5749	5556.2	1.0347	-11.5
21500	loose	other	5460	5556.2	0.982686	-21.5
11500	random	other	16755	16817.6	0.996279	-11.5
2500	random	other	16676	16817.6	0.991582	-2.5
10500	loose	other	5863	5556.2	1.05522	-10.5
20500	loose	other	5472	5556.2	0.984846	-20.5
1500	random	other	16737	16817.6	0.995209	-1.5
9500	loose	other	5986	5556.2	1.07736	-9.5
500	random	other	16931	16817.6	1.00674	-0.5
8500	loose	other	6037	5556.2	1.08653	-8.5
-500	random	other	16895	16817.6	1.0046	0.5
7500	loose	other	6204	5556.2	1.11659	-7.5
-1500	random	other	16779	16817.6	0.997706	1.5
6500	loose	other	6450	5556.2	1.16087	-6.5
-2500	random	other	16771	16817.6	0.997231	2.5
5500	loose	other	6728	5556.2	1.2109	-5.5
-3500	random	other	16793	16817.6	0.998539	3.5
4500	loose	other	7101	5556.2	1.27803	-4.5
-4500	random	other	16869	16817.6	1.00306	4.5
3500	loose	other	7225	5556.2	1.30035	-3.5
-5500	random	other	16902	16817.6	1.00502	5.5
2500	loose	other	7315	5556.2	1.31655	-2.5
-6500	random	other	16779	16817.6	0.997706	6.5
1500	loose	other	7572	5556.2	1.3628	-1.5
-7500	random	other	16723	16817.6	0.994377	7.5
500	loose	other	7816	5556.2	1.40672	-0.5
-8500	random	other	16731	16817.6	0.994852	8.5
-500	loose	other	8496	5556.2	1.5291	0.5
-9500	random	other	16831	16817.6	1.0008	9.5
-1500	loose	other	7607	5556.2	1.3691	1.5
-10500	random	other	16752	16817.6	0.996101	10.5
-3500	loose	other	7203	5556.2	1.29639	3.5
-12500	random	other	16797	16817.6	0.998777	12.5
-4500	loose	other	7020	5556.2	1.26345	4.5
-13500	random	other	16791	16817.6	0.99842	13.5
-5500	loose	other	6807	5556.2	1.22512	5.5
-14500	random	other	16611	16817.6	0.987717	14.5
-6500	loose	other	6480	5556.2	1.16626	6.5
-15500	random	other	16836	16817.6	1.0011	15.5
-7500	loose	other	6234	5556.2	1.12199	7.5
-16500	random	other	16785	16817.6	0.998063	16.5
-8500	loose	other	6060	5556.2	1.09067	8.5
-17500	random	other	16775	16817.6	0.997469	17.5
-9500	loose	other	5952	5556.2	1.07124	9.5
-18500	random	other	16818	16817.6	1.00003	18.5
-10500	loose	other	5803	5556.2	1.04442	10.5
-19500	random	other	16784	16817.6	0.998004	19.5
-11500	loose	other	5744	5556.2	1.0338	11.5
-11500	random	other	16874	16817.6	1.00336	11.5
-20500	random	other	16661	16817.6	0.99069	20.5
-12500	loose	other	5557	5556.2	1.00014	12.5
-2500	loose	other	7464	5556.2	1.34336	2.5
-21500	random	other	16647	16817.6	0.989858	21.5
-13500	loose	other	5544	5556.2	0.997804	13.5
-22500	random	other	16988	16817.6	1.01013	22.5
-14500	loose	other	5492	5556.2	0.988445	14.5
-23500	random	other	16869	16817.6	1.00306	23.5
-15500	loose	other	5511	5556.2	0.991865	15.5
-24500	random	other	16939	16817.6	1.00722	24.5
-16500	loose	other	5495	5556.2	0.988985	16.5
-17500	loose	other	5440	5556.2	0.979086	17.5
-18500	loose	other	5419	5556.2	0.975307	18.5
-19500	loose	other	5458	5556.2	0.982326	19.5
-20500	loose	other	5447	5556.2	0.980346	20.5
-21500	loose	other	5373	5556.2	0.967028	21.5
-22500	loose	other	5443	5556.2	0.979626	22.5
-23500	loose	other	5383	5556.2	0.968828	23.5
-24500	loose	other	5407	5556.2	0.973147	24.5
22500	random	other	17026	16817.6	1.01239	-22.5
21500	random	other	16900	16817.6	1.0049	-21.5
20500	random	other	16869	16817.6	1.00306	-20.5
24500	random	other	17056	16817.6	1.01418	-24.5
23500	random	other	16874	16817.6	1.00336	-23.5
19500	loose	LINE	3	2.41935	1.24	-19.5
-5500	random	LINE	17	8.2	2.07317	5.5
-500	loose	LINE	24	2.41935	9.92	0.5
-13500	random	LINE	10	8.2	1.21951	13.5
20500	random	LINE	7	8.2	0.853659	-20.5
7500	random	LINE	6	8.2	0.731707	-7.5
-3500	random	LINE	9	8.2	1.09756	3.5
19500	random	LINE	8	8.2	0.97561	-19.5
18500	random	LINE	8	8.2	0.97561	-18.5
24500	random	LINE	6	8.2	0.731707	-24.5
-10500	random	LINE	12	8.2	1.46341	10.5
11500	random	LINE	18	8.2	2.19512	-11.5
5500	random	LINE	7	8.2	0.853659	-5.5
1500	random	LINE	8	8.2	0.97561	-1.5
2500	random	LINE	11	8.2	1.34146	-2.5
-17500	random	LINE	10	8.2	1.21951	17.5
-9500	random	LINE	6	8.2	0.731707	9.5
-2500	random	LINE	8	8.2	0.97561	2.5
-8500	random	LINE	10	8.2	1.21951	8.5
-22500	random	LINE	8	8.2	0.97561	22.5
-500	random	LINE	6	8.2	0.731707	0.5
22500	random	LINE	5	8.2	0.609756	-22.5
10500	random	LINE	5	8.2	0.609756	-10.5
-4500	loose	LINE	3	2.41935	1.24	4.5
13500	loose	LINE	2	2.41935	0.826667	-13.5
17500	loose	LINE	1	2.41935	0.413333	-17.5
2500	loose	LINE	5	2.41935	2.06667	-2.5
1500	loose	LINE	5	2.41935	2.06667	-1.5
16500	random	LINE	9	8.2	1.09756	-16.5
5500	loose	LINE	4	2.41935	1.65333	-5.5
-20500	loose	LINE	4	2.41935	1.65333	20.5
23500	loose	LINE	4	2.41935	1.65333	-23.5
3500	random	LINE	14	8.2	1.70732	-3.5
-5500	loose	LINE	7	2.41935	2.89333	5.5
13500	random	LINE	13	8.2	1.58537	-13.5
4500	random	LINE	8	8.2	0.97561	-4.5
-9500	loose	LINE	2	2.41935	0.826667	9.5
9500	loose	LINE	3	2.41935	1.24	-9.5
500	loose	LINE	9	2.41935	3.72	-0.5
-20500	random	LINE	10	8.2	1.21951	20.5
-12500	random	LINE	12	8.2	1.46341	12.5
-1500	random	LINE	12	8.2	1.46341	1.5
-4500	random	LINE	5	8.2	0.609756	4.5
15500	random	LINE	11	8.2	1.34146	-15.5
-3500	loose	LINE	4	2.41935	1.65333	3.5
-15500	random	LINE	7	8.2	0.853659	15.5
500	random	LINE	5	8.2	0.609756	-0.5
-6500	random	LINE	8	8.2	0.97561	6.5
15500	loose	LINE	2	2.41935	0.826667	-15.5
8500	random	LINE	6	8.2	0.731707	-8.5
-21500	random	LINE	12	8.2	1.46341	21.5
-18500	loose	LINE	5	2.41935	2.06667	18.5
-16500	loose	LINE	2	2.41935	0.826667	16.5
-16500	random	LINE	2	8.2	0.243902	16.5
-18500	random	LINE	7	8.2	0.853659	18.5
-6500	loose	LINE	2	2.41935	0.826667	6.5
-19500	random	LINE	11	8.2	1.34146	19.5
4500	loose	LINE	5	2.41935	2.06667	-4.5
-1500	loose	LINE	8	2.41935	3.30667	1.5
-13500	loose	LINE	2	2.41935	0.826667	13.5
-7500	loose	LINE	3	2.41935	1.24	7.5
18500	loose	LINE	3	2.41935	1.24	-18.5
24500	loose	LINE	1	2.41935	0.413333	-24.5
3500	loose	LINE	4	2.41935	1.65333	-3.5
-2500	loose	LINE	2	2.41935	0.826667	2.5
-12500	loose	LINE	5	2.41935	2.06667	12.5
-23500	random	LINE	11	8.2	1.34146	23.5
6500	random	LINE	7	8.2	0.853659	-6.5
-11500	random	LINE	10	8.2	1.21951	11.5
8500	loose	LINE	2	2.41935	0.826667	-8.5
-14500	random	LINE	8	8.2	0.97561	14.5
12500	random	LINE	8	8.2	0.97561	-12.5
-7500	random	LINE	9	8.2	1.09756	7.5
-19500	loose	LINE	2	2.41935	0.826667	19.5
11500	loose	LINE	3	2.41935	1.24	-11.5
21500	loose	LINE	1	2.41935	0.413333	-21.5
7500	loose	LINE	1	2.41935	0.413333	-7.5
17500	random	LINE	5	8.2	0.609756	-17.5
23500	random	LINE	6	8.2	0.731707	-23.5
10500	loose	LINE	2	2.41935	0.826667	-10.5
-24500	random	LINE	6	8.2	0.731707	24.5
14500	loose	LINE	4	2.41935	1.65333	-14.5
-22500	loose	LINE	2	2.41935	0.826667	22.5
-23500	loose	LINE	1	2.41935	0.413333	23.5
9500	random	LINE	4	8.2	0.487805	-9.5
21500	random	LINE	6	8.2	0.731707	-21.5
14500	random	LINE	3	8.2	0.365854	-14.5
20500	loose	LINE	2	2.41935	0.826667	-20.5
-11500	loose	LINE	2	2.41935	0.826667	11.5
-15500	loose	LINE	2	2.41935	0.826667	15.5
16500	loose	LINE	3	2.41935	1.24	-16.5
-17500	loose	LINE	1	2.41935	0.413333	17.5
-14500	loose	LINE	1	2.41935	0.413333	14.5
12500	loose	LINE	1	2.41935	0.413333	-12.5
-24500	loose	LINE	1	2.41935	0.413333	24.5

## Sheet: 5B_VIRAL
read.strand	somatic	tumor	bin	n	norm.factor	norm.n	x
reverse	somatic	tumor	-3850	7907	8037.8	0.983727	3.85
reverse	somatic	tumor	-3750	7646	8037.8	0.951255	3.75
forward	somatic	tumor	-3650	7781	8113.95	0.958966	3.65
reverse	somatic	tumor	-3650	7966	8037.8	0.991067	3.65
reverse	somatic	tumor	-3550	8061	8037.8	1.00289	3.55
reverse	somatic	tumor	2350	11046	8037.8	1.37426	-2.35
forward	somatic	tumor	2350	11201	8113.95	1.38046	-2.35
forward	somatic	tumor	3350	12024	8113.95	1.48189	-3.35
reverse	somatic	tumor	3350	11137	8037.8	1.38558	-3.35
forward	somatic	tumor	3450	11123	8113.95	1.37085	-3.45
forward	somatic	tumor	4450	10323	8113.95	1.27225	-4.45
reverse	somatic	tumor	4450	10016	8037.8	1.24611	-4.45
reverse	somatic	tumor	4350	10529	8037.8	1.30994	-4.35
forward	somatic	tumor	4350	10891	8113.95	1.34226	-4.35
forward	somatic	tumor	4250	10703	8113.95	1.31909	-4.25
reverse	somatic	tumor	4250	11207	8037.8	1.39429	-4.25
forward	somatic	tumor	4150	10527	8113.95	1.2974	-4.15
reverse	somatic	tumor	4150	10676	8037.8	1.32822	-4.15
reverse	somatic	tumor	4050	10849	8037.8	1.34975	-4.05
forward	somatic	tumor	4050	11117	8113.95	1.37011	-4.05
forward	somatic	tumor	3950	10574	8113.95	1.30319	-3.95
reverse	somatic	tumor	3650	10580	8037.8	1.31628	-3.65
forward	somatic	tumor	3550	10777	8113.95	1.32821	-3.55
reverse	somatic	tumor	3550	10998	8037.8	1.36828	-3.55
forward	somatic	tumor	2650	10682	8113.95	1.3165	-2.65
reverse	somatic	tumor	2550	10731	8037.8	1.33507	-2.55
reverse	somatic	tumor	2450	10930	8037.8	1.35982	-2.45
reverse	somatic	tumor	850	10855	8037.8	1.35049	-0.85
forward	somatic	tumor	850	13079	8113.95	1.61192	-0.85
reverse	somatic	tumor	1050	10547	8037.8	1.31217	-1.05
forward	somatic	tumor	950	11723	8113.95	1.4448	-0.95
forward	somatic	tumor	750	13516	8113.95	1.66577	-0.75
reverse	somatic	tumor	-2150	8236	8037.8	1.02466	2.15
forward	somatic	tumor	-2250	8340	8113.95	1.02786	2.25
reverse	somatic	tumor	-2450	7905	8037.8	0.983478	2.45
reverse	somatic	tumor	-4950	4318	8037.8	0.537212	4.95
forward	somatic	tumor	-4950	3857	8113.95	0.475354	4.95
reverse	somatic	tumor	-4850	8209	8037.8	1.0213	4.85
forward	somatic	tumor	-4850	8079	8113.95	0.995693	4.85
forward	somatic	normal	-4850	4453	4701.43	0.94716	4.85
forward	somatic	tumor	-4750	7940	8113.95	0.978562	4.75
reverse	somatic	normal	-4750	4852	4722.02	1.02753	4.75
reverse	somatic	tumor	-4750	8438	8037.8	1.04979	4.75
forward	somatic	normal	-2250	4911	4701.43	1.04458	2.25
forward	somatic	normal	-2150	4806	4701.43	1.02224	2.15
forward	somatic	tumor	-2150	7999	8113.95	0.985833	2.15
reverse	somatic	tumor	2650	10512	8037.8	1.30782	-2.65
forward	somatic	normal	2750	5479	4701.43	1.16539	-2.75
reverse	somatic	tumor	2750	10373	8037.8	1.29053	-2.75
forward	somatic	tumor	2850	10713	8113.95	1.32032	-2.85
reverse	somatic	tumor	2850	10866	8037.8	1.35186	-2.85
reverse	somatic	tumor	2950	10734	8037.8	1.33544	-2.95
forward	somatic	tumor	2950	10719	8113.95	1.32106	-2.95
forward	somatic	tumor	3050	10367	8113.95	1.27768	-3.05
forward	somatic	tumor	3650	10304	8113.95	1.26991	-3.65
forward	somatic	tumor	1450	11039	8113.95	1.3605	-1.45
reverse	somatic	tumor	1450	10327	8037.8	1.2848	-1.45
reverse	somatic	tumor	1350	10691	8037.8	1.33009	-1.35
reverse	somatic	tumor	250	11145	8037.8	1.38657	-0.25
reverse	somatic	tumor	350	10795	8037.8	1.34303	-0.35
reverse	somatic	tumor	450	10416	8037.8	1.29588	-0.45
reverse	somatic	tumor	550	10993	8037.8	1.36766	-0.55
forward	somatic	tumor	550	15880	8113.95	1.95712	-0.55
forward	somatic	tumor	650	14821	8113.95	1.82661	-0.65
forward	somatic	tumor	1950	11362	8113.95	1.4003	-1.95
reverse	somatic	tumor	1950	10552	8037.8	1.3128	-1.95
reverse	somatic	tumor	2050	10469	8037.8	1.30247	-2.05
forward	somatic	tumor	2050	11316	8113.95	1.39464	-2.05
forward	somatic	tumor	2450	11511	8113.95	1.41867	-2.45
forward	somatic	tumor	2550	10868	8113.95	1.33942	-2.55
reverse	somatic	tumor	3750	10478	8037.8	1.30359	-3.75
forward	somatic	tumor	3850	11001	8113.95	1.35581	-3.85
reverse	somatic	tumor	3850	11411	8037.8	1.41967	-3.85
reverse	somatic	tumor	4750	10622	8037.8	1.32151	-4.75
reverse	somatic	tumor	4850	10308	8037.8	1.28244	-4.85
forward	somatic	tumor	4850	11046	8113.95	1.36136	-4.85
forward	somatic	tumor	4950	10423	8113.95	1.28458	-4.95
reverse	somatic	tumor	4950	10909	8037.8	1.35721	-4.95
forward	somatic	tumor	5050	5420	8113.95	0.667985	-5.05
forward	somatic	tumor	1250	11202	8113.95	1.38059	-1.25
reverse	somatic	tumor	1250	10952	8037.8	1.36256	-1.25
forward	somatic	tumor	1150	11207	8113.95	1.3812	-1.15
reverse	somatic	tumor	1150	11235	8037.8	1.39777	-1.15
forward	somatic	tumor	1050	10946	8113.95	1.34903	-1.05
forward	somatic	tumor	250	22678	8113.95	2.79494	-0.25
forward	somatic	tumor	150	24891	8113.95	3.06768	-0.15
reverse	somatic	tumor	150	10720	8037.8	1.3337	-0.15
forward	somatic	tumor	50	22327	8113.95	2.75168	-0.05
reverse	somatic	tumor	-950	8259	8037.8	1.02752	0.95
reverse	somatic	tumor	-1150	8064	8037.8	1.00326	1.15
reverse	somatic	tumor	-1250	8275	8037.8	1.02951	1.25
forward	somatic	tumor	-1350	8361	8113.95	1.03045	1.35
reverse	somatic	tumor	-1350	8170	8037.8	1.01645	1.35
forward	somatic	tumor	-1450	8594	8113.95	1.05916	1.45
reverse	somatic	tumor	-1450	8277	8037.8	1.02976	1.45
reverse	somatic	tumor	-3950	8018	8037.8	0.997537	3.95
reverse	somatic	tumor	-4050	8064	8037.8	1.00326	4.05
forward	somatic	tumor	-4050	8298	8113.95	1.02268	4.05
reverse	somatic	tumor	-4150	7762	8037.8	0.965687	4.15
forward	somatic	tumor	-4150	8350	8113.95	1.02909	4.15
forward	somatic	tumor	-4450	7719	8113.95	0.951325	4.45
forward	somatic	tumor	-4550	7832	8113.95	0.965251	4.55
reverse	somatic	tumor	-4550	8003	8037.8	0.99567	4.55
reverse	somatic	tumor	-4650	8201	8037.8	1.0203	4.65
forward	somatic	tumor	3750	10677	8113.95	1.31588	-3.75
reverse	somatic	tumor	3450	11112	8037.8	1.38247	-3.45
reverse	somatic	tumor	-250	9783	8037.8	1.21712	0.25
forward	somatic	tumor	-350	11553	8113.95	1.42384	0.35
reverse	somatic	tumor	-350	9592	8037.8	1.19336	0.35
reverse	somatic	tumor	-450	9511	8037.8	1.18328	0.45
forward	somatic	tumor	-450	11416	8113.95	1.40696	0.45
forward	somatic	tumor	-550	10910	8113.95	1.3446	0.55
reverse	somatic	tumor	750	11080	8037.8	1.37849	-0.75
reverse	somatic	tumor	950	10673	8037.8	1.32785	-0.95
reverse	somatic	tumor	-1550	8500	8037.8	1.0575	1.55
forward	somatic	tumor	-1650	8674	8113.95	1.06902	1.65
forward	somatic	tumor	3250	11288	8113.95	1.39118	-3.25
reverse	somatic	tumor	3250	10980	8037.8	1.36605	-3.25
reverse	somatic	tumor	3150	10579	8037.8	1.31616	-3.15
forward	somatic	normal	-4450	4626	4701.43	0.983957	4.45
reverse	somatic	normal	-4450	4507	4722.02	0.954463	4.45
forward	somatic	tumor	-4350	8048	8113.95	0.991872	4.35
forward	somatic	tumor	-4250	8140	8113.95	1.00321	4.25
forward	somatic	normal	-4250	4878	4701.43	1.03756	4.25
reverse	somatic	normal	-4350	4489	4722.02	0.950651	4.35
reverse	somatic	tumor	-4350	7721	8037.8	0.960586	4.35
reverse	somatic	normal	-4050	4913	4722.02	1.04044	4.05
forward	somatic	normal	-4050	4768	4701.43	1.01416	4.05
forward	somatic	normal	350	5874	4701.43	1.24941	-0.35
forward	somatic	tumor	450	16798	8113.95	2.07026	-0.45
reverse	somatic	normal	450	4983	4722.02	1.05527	-0.45
forward	somatic	normal	1150	4877	4701.43	1.03735	-1.15
forward	somatic	normal	1250	5032	4701.43	1.07031	-1.25
forward	somatic	normal	1550	5321	4701.43	1.13178	-1.55
forward	somatic	tumor	1550	11062	8113.95	1.36333	-1.55
reverse	somatic	normal	1550	5240	4722.02	1.10969	-1.55
reverse	somatic	tumor	2150	10970	8037.8	1.3648	-2.15
forward	somatic	tumor	2150	11218	8113.95	1.38256	-2.15
reverse	somatic	normal	2150	5150	4722.02	1.09063	-2.15
forward	somatic	normal	2150	4958	4701.43	1.05457	-2.15
reverse	somatic	tumor	2250	11374	8037.8	1.41506	-2.25
reverse	somatic	normal	2250	5338	4722.02	1.13045	-2.25
forward	somatic	normal	2950	4827	4701.43	1.02671	-2.95
reverse	somatic	normal	3150	4708	4722.02	0.99703	-3.15
forward	somatic	normal	3250	5185	4701.43	1.10286	-3.25
forward	somatic	tumor	3150	10668	8113.95	1.31477	-3.15
forward	somatic	normal	3150	4750	4701.43	1.01033	-3.15
reverse	somatic	normal	3250	5185	4722.02	1.09805	-3.25
forward	somatic	normal	3450	5019	4701.43	1.06755	-3.45
forward	somatic	normal	3750	4906	4701.43	1.04351	-3.75
reverse	somatic	normal	4350	4824	4722.02	1.0216	-4.35
forward	somatic	normal	4350	5012	4701.43	1.06606	-4.35
forward	somatic	normal	4450	4763	4701.43	1.0131	-4.45
reverse	somatic	normal	4450	4725	4722.02	1.00063	-4.45
forward	somatic	normal	4850	5044	4701.43	1.07287	-4.85
forward	somatic	normal	5050	2329	4701.43	0.495382	-5.05
reverse	somatic	normal	4750	5064	4722.02	1.07242	-4.75
forward	somatic	tumor	4650	10862	8113.95	1.33868	-4.65
forward	somatic	normal	4650	4750	4701.43	1.01033	-4.65
reverse	somatic	normal	4650	4779	4722.02	1.01207	-4.65
reverse	somatic	tumor	4550	10141	8037.8	1.26166	-4.55
forward	somatic	tumor	4550	10823	8113.95	1.33388	-4.55
reverse	somatic	tumor	3950	10306	8037.8	1.28219	-3.95
forward	somatic	normal	3950	4849	4701.43	1.03139	-3.95
reverse	somatic	normal	3950	4835	4722.02	1.02393	-3.95
reverse	somatic	normal	3650	4646	4722.02	0.9839	-3.65
reverse	somatic	tumor	3050	10606	8037.8	1.31952	-3.05
forward	somatic	normal	3050	5001	4701.43	1.06372	-3.05
reverse	somatic	normal	3050	5069	4722.02	1.07348	-3.05
reverse	somatic	normal	2350	5265	4722.02	1.11499	-2.35
forward	somatic	normal	2350	5488	4701.43	1.16731	-2.35
reverse	somatic	normal	1850	4934	4722.02	1.04489	-1.85
reverse	somatic	tumor	1850	11075	8037.8	1.37786	-1.85
forward	somatic	normal	1850	5052	4701.43	1.07457	-1.85
forward	somatic	normal	1750	5050	4701.43	1.07414	-1.75
forward	somatic	tumor	1750	10958	8113.95	1.35051	-1.75
forward	somatic	normal	1050	4913	4701.43	1.045	-1.05
reverse	somatic	normal	1050	5278	4722.02	1.11774	-1.05
reverse	somatic	normal	250	5157	4722.02	1.09212	-0.25
reverse	somatic	normal	150	5109	4722.02	1.08195	-0.15
forward	somatic	tumor	-150	14781	8113.95	1.82168	0.15
reverse	somatic	tumor	-150	9721	8037.8	1.20941	0.15
forward	somatic	normal	-150	5215	4701.43	1.10924	0.15
reverse	somatic	normal	-250	5290	4722.02	1.12028	0.25
forward	somatic	normal	-250	5182	4701.43	1.10222	0.25
forward	somatic	tumor	-250	13151	8113.95	1.62079	0.25
forward	somatic	normal	-350	4899	4701.43	1.04202	0.35
reverse	somatic	normal	-350	5436	4722.02	1.1512	0.35
forward	somatic	normal	-450	5167	4701.43	1.09903	0.45
reverse	somatic	normal	-450	5365	4722.02	1.13617	0.45
reverse	somatic	tumor	-550	8798	8037.8	1.09458	0.55
reverse	somatic	normal	-550	5227	4722.02	1.10694	0.55
forward	somatic	tumor	-650	9983	8113.95	1.23035	0.65
reverse	somatic	tumor	-650	9257	8037.8	1.15168	0.65
reverse	somatic	normal	-850	4660	4722.02	0.986865	0.85
reverse	somatic	tumor	-850	8596	8037.8	1.06945	0.85
reverse	somatic	normal	-950	4781	4722.02	1.01249	0.95
forward	somatic	tumor	-950	8686	8113.95	1.0705	0.95
forward	somatic	normal	-1550	4838	4701.43	1.02905	1.55
forward	somatic	tumor	-1550	8469	8113.95	1.04376	1.55
reverse	somatic	tumor	-1750	8309	8037.8	1.03374	1.75
reverse	somatic	tumor	-1850	7998	8037.8	0.995048	1.85
reverse	somatic	normal	-2150	4929	4722.02	1.04383	2.15
reverse	somatic	tumor	-2250	8814	8037.8	1.09657	2.25
reverse	somatic	normal	-2250	5010	4722.02	1.06099	2.25
forward	somatic	tumor	-2950	8796	8113.95	1.08406	2.95
reverse	somatic	tumor	-2950	8126	8037.8	1.01097	2.95
forward	somatic	tumor	-3050	8443	8113.95	1.04055	3.05
reverse	somatic	normal	-3050	4792	4722.02	1.01482	3.05
forward	somatic	tumor	-3150	8117	8113.95	1.00038	3.15
reverse	somatic	tumor	-3150	7830	8037.8	0.974147	3.15
reverse	somatic	normal	-3250	4811	4722.02	1.01884	3.25
forward	somatic	normal	-3450	4585	4701.43	0.975236	3.45
forward	somatic	normal	-3550	4822	4701.43	1.02565	3.55
reverse	somatic	normal	-3650	4783	4722.02	1.01291	3.65
forward	somatic	normal	-3650	4800	4701.43	1.02097	3.65
forward	somatic	tumor	-3850	7895	8113.95	0.973016	3.85
forward	somatic	normal	-3850	4626	4701.43	0.983957	3.85
reverse	somatic	tumor	-4250	7711	8037.8	0.959342	4.25
reverse	somatic	normal	-4150	4560	4722.02	0.965687	4.15
forward	somatic	normal	-4650	4731	4701.43	1.00629	4.65
forward	somatic	tumor	-4650	7809	8113.95	0.962417	4.65
forward	somatic	normal	-4750	4639	4701.43	0.986722	4.75
reverse	somatic	normal	-4950	2444	4722.02	0.517575	4.95
forward	somatic	normal	-4950	2323	4701.43	0.494106	4.95
forward	somatic	normal	4250	4983	4701.43	1.05989	-4.25
reverse	somatic	normal	4250	4969	4722.02	1.0523	-4.25
forward	somatic	normal	4150	4739	4701.43	1.00799	-4.15
reverse	somatic	normal	4050	4923	4722.02	1.04256	-4.05
forward	somatic	normal	3550	4974	4701.43	1.05798	-3.55
forward	somatic	tumor	2250	11461	8113.95	1.41251	-2.25
forward	somatic	normal	2050	5094	4701.43	1.0835	-2.05
reverse	somatic	normal	2050	4887	4722.02	1.03494	-2.05
reverse	somatic	normal	1950	4710	4722.02	0.997453	-1.95
forward	somatic	normal	1950	5055	4701.43	1.07521	-1.95
forward	somatic	tumor	1850	11005	8113.95	1.35631	-1.85
reverse	somatic	normal	950	5123	4722.02	1.08492	-0.95
forward	somatic	normal	950	5010	4701.43	1.06563	-0.95
forward	somatic	normal	450	5830	4701.43	1.24005	-0.45
forward	somatic	tumor	350	18571	8113.95	2.28877	-0.35
reverse	somatic	normal	350	5098	4722.02	1.07962	-0.35
reverse	somatic	normal	-50	5154	4722.02	1.09148	0.05
forward	somatic	normal	-50	5781	4701.43	1.22963	0.05
forward	somatic	normal	-850	4989	4701.43	1.06117	0.85
forward	somatic	tumor	-850	9015	8113.95	1.11105	0.85
forward	somatic	normal	-1450	4769	4701.43	1.01437	1.45
reverse	somatic	normal	-1450	4637	4722.02	0.981994	1.45
forward	somatic	normal	-1650	5149	4701.43	1.0952	1.65
forward	somatic	normal	-1750	4890	4701.43	1.04011	1.75
forward	somatic	normal	-1950	4827	4701.43	1.02671	1.95
forward	somatic	tumor	-1950	8227	8113.95	1.01393	1.95
reverse	somatic	normal	-2650	4922	4722.02	1.04235	2.65
forward	somatic	tumor	-2650	8008	8113.95	0.986942	2.65
reverse	somatic	tumor	-2650	8568	8037.8	1.06596	2.65
reverse	somatic	normal	-2750	4933	4722.02	1.04468	2.75
reverse	somatic	tumor	-3050	7521	8037.8	0.935704	3.05
reverse	somatic	normal	-3150	4625	4722.02	0.979453	3.15
reverse	somatic	normal	-3550	4952	4722.02	1.0487	3.55
reverse	somatic	normal	-3950	4804	4722.02	1.01736	3.95
forward	somatic	tumor	-3950	8101	8113.95	0.998404	3.95
reverse	somatic	normal	3350	4900	4722.02	1.03769	-3.35
forward	somatic	normal	750	5067	4701.43	1.07776	-0.75
forward	somatic	normal	650	5299	4701.43	1.12711	-0.65
forward	somatic	normal	-550	5350	4701.43	1.13795	0.55
reverse	somatic	normal	-650	5243	4722.02	1.11033	0.65
forward	somatic	normal	-650	5197	4701.43	1.10541	0.65
reverse	somatic	normal	-750	4727	4722.02	1.00105	0.75
reverse	somatic	tumor	-750	8113	8037.8	1.00936	0.75
forward	somatic	normal	-750	4944	4701.43	1.0516	0.75
forward	somatic	normal	-1050	4873	4701.43	1.03649	1.05
reverse	somatic	tumor	-1050	8122	8037.8	1.01048	1.05
reverse	somatic	normal	-1050	4646	4722.02	0.9839	1.05
reverse	somatic	normal	-1150	4683	4722.02	0.991736	1.15
forward	somatic	tumor	-1150	8643	8113.95	1.0652	1.15
reverse	somatic	tumor	-3250	8277	8037.8	1.02976	3.25
forward	somatic	normal	-3350	4732	4701.43	1.0065	3.35
reverse	somatic	tumor	-3350	8229	8037.8	1.02379	3.35
reverse	somatic	normal	-3350	4739	4722.02	1.00359	3.35
forward	somatic	tumor	-3350	8453	8113.95	1.04179	3.35
forward	somatic	tumor	-3550	8035	8113.95	0.99027	3.55
forward	somatic	normal	-4150	4768	4701.43	1.01416	4.15
reverse	somatic	tumor	-1950	8057	8037.8	1.00239	1.95
reverse	somatic	normal	-1950	4655	4722.02	0.985806	1.95
reverse	somatic	normal	-1850	5099	4722.02	1.07983	1.85
forward	somatic	normal	-1850	4889	4701.43	1.0399	1.85
reverse	somatic	normal	-4650	4710	4722.02	0.997453	4.65
reverse	somatic	normal	-4550	4739	4722.02	1.00359	4.55
forward	somatic	normal	-4550	4582	4701.43	0.974598	4.55
forward	somatic	normal	-3950	4641	4701.43	0.987148	3.95
forward	somatic	tumor	-3750	7637	8113.95	0.941219	3.75
reverse	somatic	normal	-3750	4818	4722.02	1.02032	3.75
forward	somatic	normal	-3750	4431	4701.43	0.94248	3.75
forward	somatic	tumor	-3450	8238	8113.95	1.01529	3.45
reverse	somatic	tumor	-2850	8171	8037.8	1.01657	2.85
forward	somatic	normal	-2850	4788	4701.43	1.01841	2.85
forward	somatic	tumor	-2850	8083	8113.95	0.996186	2.85
reverse	somatic	normal	-2850	4733	4722.02	1.00232	2.85
reverse	somatic	tumor	-2750	8314	8037.8	1.03436	2.75
reverse	somatic	tumor	-2050	7721	8037.8	0.960586	2.05
forward	somatic	normal	-2050	4715	4701.43	1.00289	2.05
forward	somatic	tumor	-50	16254	8113.95	2.00322	0.05
reverse	somatic	tumor	-50	9804	8037.8	1.21974	0.05
reverse	somatic	normal	50	5190	4722.02	1.0991	-0.05
forward	somatic	normal	50	5629	4701.43	1.1973	-0.05
reverse	somatic	tumor	50	9773	8037.8	1.21588	-0.05
forward	somatic	normal	850	5385	4701.43	1.1454	-0.85
reverse	somatic	normal	850	5014	4722.02	1.06183	-0.85
reverse	somatic	normal	1250	4991	4722.02	1.05696	-1.25
forward	somatic	normal	2250	5195	4701.43	1.10498	-2.25
reverse	somatic	normal	2450	5117	4722.02	1.08365	-2.45
reverse	somatic	normal	3450	4947	4722.02	1.04764	-3.45
reverse	somatic	normal	4150	4606	4722.02	0.975429	-4.15
forward	somatic	normal	4550	4924	4701.43	1.04734	-4.55
forward	somatic	tumor	4750	10769	8113.95	1.32722	-4.75
forward	somatic	normal	4750	5024	4701.43	1.06861	-4.75
reverse	somatic	normal	4850	4821	4722.02	1.02096	-4.85
reverse	somatic	normal	4950	4953	4722.02	1.04891	-4.95
forward	somatic	normal	4950	4779	4701.43	1.0165	-4.95
reverse	somatic	normal	5050	2636	4722.02	0.558235	-5.05
forward	somatic	normal	4050	5130	4701.43	1.09116	-4.05
reverse	somatic	normal	3750	4721	4722.02	0.999783	-3.75
reverse	somatic	normal	-4850	4691	4722.02	0.99343	4.85
forward	somatic	normal	150	5643	4701.43	1.20027	-0.15
reverse	somatic	tumor	1550	10890	8037.8	1.35485	-1.55
forward	somatic	tumor	1650	11496	8113.95	1.41682	-1.65
forward	somatic	normal	1650	4944	4701.43	1.0516	-1.65
reverse	somatic	tumor	1650	10872	8037.8	1.35261	-1.65
reverse	somatic	normal	1750	5020	4722.02	1.0631	-1.75
reverse	somatic	normal	2750	4842	4722.02	1.02541	-2.75
forward	somatic	normal	2850	5142	4701.43	1.09371	-2.85
reverse	somatic	normal	2950	5009	4722.02	1.06077	-2.95
reverse	somatic	normal	4550	4579	4722.02	0.969711	-4.55
forward	somatic	normal	3850	5047	4701.43	1.0735	-3.85
forward	somatic	normal	3650	4900	4701.43	1.04224	-3.65
reverse	somatic	normal	3550	5036	4722.02	1.06649	-3.55
forward	somatic	normal	2550	5143	4701.43	1.09392	-2.55
reverse	somatic	normal	2550	4773	4722.02	1.0108	-2.55
reverse	somatic	tumor	1750	10759	8037.8	1.33855	-1.75
forward	somatic	tumor	1350	11484	8113.95	1.41534	-1.35
forward	somatic	normal	1350	5226	4701.43	1.11158	-1.35
reverse	somatic	normal	650	5212	4722.02	1.10376	-0.65
reverse	somatic	tumor	650	11135	8037.8	1.38533	-0.65
reverse	somatic	normal	550	5242	4722.02	1.11012	-0.55
forward	somatic	normal	-1250	4693	4701.43	0.998208	1.25
reverse	somatic	normal	-1250	4877	4722.02	1.03282	1.25
forward	somatic	normal	-1350	4706	4701.43	1.00097	1.35
reverse	somatic	normal	-1350	4553	4722.02	0.964205	1.35
forward	somatic	normal	-3050	4774	4701.43	1.01544	3.05
forward	somatic	normal	-3150	4640	4701.43	0.986935	3.15
reverse	somatic	normal	-3850	4675	4722.02	0.990041	3.85
reverse	somatic	normal	-4250	4460	4722.02	0.94451	4.25
forward	somatic	normal	-4350	4692	4701.43	0.997995	4.35
reverse	somatic	tumor	-4450	7856	8037.8	0.977382	4.45
forward	somatic	normal	550	5391	4701.43	1.14667	-0.55
forward	somatic	normal	250	6141	4701.43	1.3062	-0.25
forward	somatic	normal	-1150	4791	4701.43	1.01905	1.15
reverse	somatic	normal	-3450	4877	4722.02	1.03282	3.45
reverse	somatic	normal	2850	4723	4722.02	1.00021	-2.85
reverse	somatic	normal	1450	4721	4722.02	0.999783	-1.45
forward	somatic	normal	1450	4939	4701.43	1.05053	-1.45
reverse	somatic	normal	-1550	4945	4722.02	1.04722	1.55
reverse	somatic	normal	-1650	4881	4722.02	1.03367	1.65
reverse	somatic	normal	-1750	4952	4722.02	1.0487	1.75
reverse	somatic	normal	-2050	4601	4722.02	0.97437	2.05
forward	somatic	tumor	-2050	8242	8113.95	1.01578	2.05
forward	somatic	normal	-2750	4795	4701.43	1.0199	2.75
reverse	somatic	normal	3850	5082	4722.02	1.07623	-3.85
forward	somatic	tumor	-3250	8008	8113.95	0.986942	3.25
forward	somatic	normal	2450	5332	4701.43	1.13412	-2.45
reverse	somatic	normal	2650	4804	4722.02	1.01736	-2.65
forward	somatic	normal	2650	4955	4701.43	1.05394	-2.65
forward	somatic	tumor	2750	10973	8113.95	1.35236	-2.75
forward	somatic	normal	3350	5295	4701.43	1.12625	-3.35
reverse	somatic	tumor	4650	11029	8037.8	1.37214	-4.65
forward	somatic	tumor	-2750	7969	8113.95	0.982136	2.75
reverse	somatic	normal	-2950	4785	4722.02	1.01334	2.95
forward	somatic	normal	-2950	5098	4701.43	1.08435	2.95
reverse	somatic	normal	1650	4931	4722.02	1.04426	-1.65
reverse	somatic	normal	-150	5418	4722.02	1.14739	0.15
forward	somatic	tumor	-1850	8510	8113.95	1.04881	1.85
reverse	somatic	tumor	-3450	8674	8037.8	1.07915	3.45
forward	somatic	normal	-2650	4743	4701.43	1.00884	2.65
forward	somatic	tumor	-1750	8732	8113.95	1.07617	1.75
reverse	somatic	tumor	-1650	8578	8037.8	1.06721	1.65
forward	somatic	normal	-950	4932	4701.43	1.04904	0.95
forward	somatic	tumor	-1250	8069	8113.95	0.99446	1.25
reverse	somatic	normal	1150	5517	4722.02	1.16835	-1.15
forward	somatic	tumor	-750	8915	8113.95	1.09873	0.75
reverse	somatic	normal	750	5237	4722.02	1.10906	-0.75
reverse	somatic	normal	-2350	4973	4722.02	1.05315	2.35
forward	somatic	normal	-2350	4807	4701.43	1.02246	2.35
reverse	somatic	tumor	-2350	8604	8037.8	1.07044	2.35
reverse	somatic	normal	-2550	5052	4722.02	1.06988	2.55
reverse	somatic	tumor	-2550	8291	8037.8	1.0315	2.55
forward	somatic	tumor	-2550	8418	8113.95	1.03747	2.55
forward	somatic	normal	-2550	5001	4701.43	1.06372	2.55
forward	somatic	normal	-3250	4489	4701.43	0.954817	3.25
forward	somatic	tumor	-1050	8490	8113.95	1.04635	1.05
reverse	somatic	normal	1350	4733	4722.02	1.00232	-1.35
forward	somatic	tumor	-2350	8767	8113.95	1.08048	2.35
forward	somatic	tumor	-2450	8387	8113.95	1.03365	2.45
forward	somatic	normal	-2450	4968	4701.43	1.0567	2.45
reverse	somatic	normal	-2450	4774	4722.02	1.01101	2.45
reverse	somatic	tumor	5050	5830	8037.8	0.725323	-5.05

## Sheet: 5B_SATELLITE
read.strand	somatic	tumor	bin	n	norm.factor	norm.n	x
forward	somatic	tumor	-4750	288	248.7	1.15802	4.75
reverse	somatic	tumor	-4750	302	260.425	1.15964	4.75
forward	somatic	tumor	-4650	234	248.7	0.940893	4.65
forward	somatic	normal	-4650	147	129.55	1.1347	4.65
reverse	somatic	normal	-4650	126	133.25	0.945591	4.65
forward	somatic	tumor	-4450	219	248.7	0.880579	4.45
forward	somatic	normal	-4450	118	129.55	0.910845	4.45
forward	somatic	normal	3950	110	129.55	0.849093	-3.95
forward	somatic	tumor	3950	306	248.7	1.2304	-3.95
forward	somatic	normal	4050	92	129.55	0.710151	-4.05
forward	somatic	normal	-3750	126	129.55	0.972597	3.75
reverse	somatic	tumor	-3750	230	260.425	0.883172	3.75
forward	somatic	tumor	-3750	285	248.7	1.14596	3.75
reverse	somatic	normal	-3750	142	133.25	1.06567	3.75
forward	somatic	tumor	-3850	251	248.7	1.00925	3.85
reverse	somatic	tumor	-3850	202	260.425	0.775655	3.85
reverse	somatic	normal	-3850	134	133.25	1.00563	3.85
reverse	somatic	normal	4450	122	133.25	0.915572	-4.45
reverse	somatic	tumor	4450	279	260.425	1.07133	-4.45
forward	somatic	tumor	4450	362	248.7	1.45557	-4.45
reverse	somatic	tumor	-3450	311	260.425	1.1942	3.45
reverse	somatic	normal	-3450	126	133.25	0.945591	3.45
forward	somatic	normal	-450	147	129.55	1.1347	0.45
forward	somatic	tumor	-1850	312	248.7	1.25452	1.85
reverse	somatic	tumor	-1850	231	260.425	0.887012	1.85
forward	somatic	normal	-1850	138	129.55	1.06523	1.85
reverse	somatic	normal	-1750	135	133.25	1.01313	1.75
reverse	somatic	tumor	-1750	245	260.425	0.94077	1.75
reverse	somatic	tumor	-1650	291	260.425	1.1174	1.65
reverse	somatic	normal	-1650	132	133.25	0.990619	1.65
forward	somatic	tumor	2750	319	248.7	1.28267	-2.75
forward	somatic	normal	2750	192	129.55	1.48205	-2.75
forward	somatic	normal	-1550	127	129.55	0.980316	1.55
forward	somatic	normal	50	190	129.55	1.46662	-0.05
forward	somatic	tumor	50	1067	248.7	4.29031	-0.05
forward	somatic	tumor	-4350	258	248.7	1.03739	4.35
reverse	somatic	tumor	-4350	280	260.425	1.07517	4.35
reverse	somatic	normal	-4350	174	133.25	1.30582	4.35
reverse	somatic	tumor	-4650	229	260.425	0.879332	4.65
forward	somatic	normal	-3350	131	129.55	1.01119	3.35
forward	somatic	normal	-3250	128	129.55	0.988036	3.25
forward	somatic	tumor	-3050	300	248.7	1.20627	3.05
reverse	somatic	tumor	1250	286	260.425	1.0982	-1.25
forward	somatic	tumor	1350	395	248.7	1.58826	-1.35
reverse	somatic	normal	1350	150	133.25	1.1257	-1.35
reverse	somatic	tumor	1350	352	260.425	1.35164	-1.35
reverse	somatic	tumor	4750	315	260.425	1.20956	-4.75
forward	somatic	normal	4750	138	129.55	1.06523	-4.75
reverse	somatic	tumor	1650	365	260.425	1.40156	-1.65
forward	somatic	tumor	1650	297	248.7	1.19421	-1.65
reverse	somatic	normal	1650	153	133.25	1.14822	-1.65
forward	somatic	normal	-4750	126	129.55	0.972597	4.75
reverse	somatic	tumor	-4550	251	260.425	0.963809	4.55
forward	somatic	tumor	-4550	198	248.7	0.79614	4.55
reverse	somatic	tumor	-4450	261	260.425	1.00221	4.45
reverse	somatic	normal	-4450	140	133.25	1.05066	4.45
forward	somatic	tumor	4750	346	248.7	1.39123	-4.75
reverse	somatic	tumor	4950	247	260.425	0.94845	-4.95
reverse	somatic	tumor	4850	244	260.425	0.93693	-4.85
reverse	somatic	tumor	4550	373	260.425	1.43227	-4.55
forward	somatic	tumor	4550	325	248.7	1.3068	-4.55
reverse	somatic	tumor	4350	333	260.425	1.27868	-4.35
reverse	somatic	tumor	4150	254	260.425	0.975329	-4.15
forward	somatic	tumor	4150	252	248.7	1.01327	-4.15
reverse	somatic	tumor	350	470	260.425	1.80474	-0.35
reverse	somatic	tumor	250	384	260.425	1.47451	-0.25
reverse	somatic	normal	250	138	133.25	1.03565	-0.25
forward	somatic	tumor	-50	809	248.7	3.25292	0.05
forward	somatic	tumor	-450	386	248.7	1.55207	0.45
forward	somatic	tumor	-650	361	248.7	1.45155	0.65
reverse	somatic	tumor	-750	339	260.425	1.30172	0.75
reverse	somatic	tumor	-1050	257	260.425	0.986848	1.05
reverse	somatic	normal	-1150	160	133.25	1.20075	1.15
reverse	somatic	tumor	-1150	288	260.425	1.10588	1.15
reverse	somatic	normal	1750	156	133.25	1.17073	-1.75
reverse	somatic	tumor	1850	353	260.425	1.35548	-1.85
forward	somatic	tumor	1950	354	248.7	1.4234	-1.95
forward	somatic	normal	1950	143	129.55	1.10382	-1.95
reverse	somatic	normal	2150	155	133.25	1.16323	-2.15
reverse	somatic	tumor	2150	353	260.425	1.35548	-2.15
reverse	somatic	tumor	2350	253	260.425	0.971489	-2.35
forward	somatic	normal	2450	135	129.55	1.04207	-2.45
reverse	somatic	tumor	2550	368	260.425	1.41307	-2.55
reverse	somatic	tumor	2650	268	260.425	1.02909	-2.65
forward	somatic	tumor	750	394	248.7	1.58424	-0.75
forward	somatic	normal	750	116	129.55	0.895407	-0.75
forward	somatic	tumor	650	493	248.7	1.98231	-0.65
forward	somatic	tumor	550	520	248.7	2.09087	-0.55
reverse	somatic	normal	450	139	133.25	1.04315	-0.45
reverse	somatic	tumor	50	288	260.425	1.10588	-0.05
reverse	somatic	tumor	-50	396	260.425	1.52059	0.05
reverse	somatic	tumor	3150	300	260.425	1.15196	-3.15
reverse	somatic	normal	3250	156	133.25	1.17073	-3.25
reverse	somatic	tumor	3350	345	260.425	1.32476	-3.35
forward	somatic	tumor	3450	334	248.7	1.34298	-3.45
forward	somatic	tumor	3550	365	248.7	1.46763	-3.55
forward	somatic	normal	3650	118	129.55	0.910845	-3.65
forward	somatic	tumor	3750	342	248.7	1.37515	-3.75
reverse	somatic	normal	3750	150	133.25	1.1257	-3.75
reverse	somatic	tumor	-850	315	260.425	1.20956	0.85
reverse	somatic	normal	-850	162	133.25	1.21576	0.85
forward	somatic	normal	-850	104	129.55	0.802779	0.85
forward	somatic	tumor	-850	239	248.7	0.960997	0.85
reverse	somatic	tumor	-950	318	260.425	1.22108	0.95
forward	somatic	normal	-950	118	129.55	0.910845	0.95
reverse	somatic	tumor	-3050	234	260.425	0.898531	3.05
forward	somatic	normal	-3050	164	129.55	1.26592	3.05
forward	somatic	normal	-2950	138	129.55	1.06523	2.95
reverse	somatic	normal	-2950	130	133.25	0.97561	2.95
forward	somatic	tumor	-2950	232	248.7	0.932851	2.95
reverse	somatic	normal	2850	151	133.25	1.13321	-2.85
forward	somatic	normal	2850	154	129.55	1.18873	-2.85
forward	somatic	normal	3150	124	129.55	0.957159	-3.15
reverse	somatic	normal	3150	133	133.25	0.998124	-3.15
forward	somatic	tumor	3150	392	248.7	1.5762	-3.15
reverse	somatic	tumor	3250	361	260.425	1.3862	-3.25
forward	somatic	tumor	3250	386	248.7	1.55207	-3.25
forward	somatic	tumor	2050	291	248.7	1.17008	-2.05
forward	somatic	normal	2050	143	129.55	1.10382	-2.05
reverse	somatic	normal	2050	132	133.25	0.990619	-2.05
reverse	somatic	tumor	2050	308	260.425	1.18268	-2.05
forward	somatic	tumor	350	938	248.7	3.77161	-0.35
forward	somatic	normal	4350	128	129.55	0.988036	-4.35
forward	somatic	tumor	4350	305	248.7	1.22638	-4.35
forward	somatic	tumor	4250	306	248.7	1.2304	-4.25
reverse	somatic	normal	4250	137	133.25	1.02814	-4.25
forward	somatic	normal	4250	147	129.55	1.1347	-4.25
reverse	somatic	tumor	-3550	244	260.425	0.93693	3.55
forward	somatic	tumor	-3650	248	248.7	0.997185	3.65
forward	somatic	normal	-3650	124	129.55	0.957159	3.65
reverse	somatic	tumor	-3650	295	260.425	1.13276	3.65
forward	somatic	tumor	150	1238	248.7	4.97789	-0.15
forward	somatic	normal	150	181	129.55	1.39714	-0.15
forward	somatic	tumor	450	701	248.7	2.81866	-0.45
forward	somatic	tumor	250	1134	248.7	4.55971	-0.25
forward	somatic	normal	250	176	129.55	1.35855	-0.25
reverse	somatic	normal	350	156	133.25	1.17073	-0.35
reverse	somatic	tumor	150	409	260.425	1.57051	-0.15
forward	somatic	tumor	3050	317	248.7	1.27463	-3.05
reverse	somatic	tumor	3050	367	260.425	1.40923	-3.05
reverse	somatic	tumor	-3350	296	260.425	1.1366	3.35
reverse	somatic	normal	-3350	120	133.25	0.900563	3.35
forward	somatic	tumor	-3350	234	248.7	0.940893	3.35
reverse	somatic	tumor	3650	328	260.425	1.25948	-3.65
reverse	somatic	tumor	3450	415	260.425	1.59355	-3.45
forward	somatic	tumor	2950	302	248.7	1.21431	-2.95
forward	somatic	normal	3050	143	129.55	1.10382	-3.05
forward	somatic	tumor	-1450	231	248.7	0.92883	1.45
reverse	somatic	tumor	550	357	260.425	1.37084	-0.55
reverse	somatic	normal	550	145	133.25	1.08818	-0.55
reverse	somatic	tumor	650	398	260.425	1.52827	-0.65
forward	somatic	normal	4450	128	129.55	0.988036	-4.45
reverse	somatic	tumor	-1550	250	260.425	0.959969	1.55
reverse	somatic	normal	-1550	122	133.25	0.915572	1.55
forward	somatic	normal	-1450	160	129.55	1.23504	1.45
forward	somatic	tumor	-1050	268	248.7	1.0776	1.05
forward	somatic	normal	-1050	123	129.55	0.94944	1.05
forward	somatic	tumor	1450	340	248.7	1.36711	-1.45
forward	somatic	tumor	950	417	248.7	1.67672	-0.95
forward	somatic	tumor	4650	299	248.7	1.20225	-4.65
forward	somatic	normal	1750	158	129.55	1.21961	-1.75
reverse	somatic	normal	1850	134	133.25	1.00563	-1.85
forward	somatic	tumor	1750	356	248.7	1.43144	-1.75
reverse	somatic	normal	50	119	133.25	0.893058	-0.05
forward	somatic	normal	-3550	151	129.55	1.16557	3.55
forward	somatic	tumor	-3550	276	248.7	1.10977	3.55
forward	somatic	tumor	4950	225	248.7	0.904704	-4.95
forward	somatic	normal	4950	93	129.55	0.71787	-4.95
forward	somatic	normal	-1150	129	129.55	0.995755	1.15
forward	somatic	tumor	-1150	250	248.7	1.00523	1.15
reverse	somatic	tumor	-2950	256	260.425	0.983009	2.95
forward	somatic	normal	-2850	138	129.55	1.06523	2.85
reverse	somatic	tumor	4050	269	260.425	1.03293	-4.05
forward	somatic	tumor	4050	299	248.7	1.20225	-4.05
reverse	somatic	normal	3950	137	133.25	1.02814	-3.95
reverse	somatic	tumor	3950	328	260.425	1.25948	-3.95
reverse	somatic	tumor	-1950	204	260.425	0.783335	1.95
forward	somatic	tumor	-250	624	248.7	2.50905	0.25
forward	somatic	normal	-250	164	129.55	1.26592	0.25
reverse	somatic	normal	2550	145	133.25	1.08818	-2.55
reverse	somatic	normal	2650	132	133.25	0.990619	-2.65
reverse	somatic	tumor	-3950	195	260.425	0.748776	3.95
forward	somatic	tumor	-3950	206	248.7	0.828307	3.95
reverse	somatic	normal	-3950	138	133.25	1.03565	3.95
forward	somatic	tumor	-4050	219	248.7	0.880579	4.05
reverse	somatic	tumor	-4050	250	260.425	0.959969	4.05
forward	somatic	normal	-4150	119	129.55	0.918564	4.15
reverse	somatic	tumor	950	285	260.425	1.09436	-0.95
reverse	somatic	normal	950	131	133.25	0.983114	-0.95
reverse	somatic	normal	1050	155	133.25	1.16323	-1.05
reverse	somatic	tumor	4250	305	260.425	1.17116	-4.25
reverse	somatic	normal	4350	116	133.25	0.870544	-4.35
reverse	somatic	normal	4550	135	133.25	1.01313	-4.55
forward	somatic	tumor	4850	355	248.7	1.42742	-4.85
reverse	somatic	tumor	1150	340	260.425	1.30556	-1.15
forward	somatic	tumor	1250	391	248.7	1.57218	-1.25
forward	somatic	normal	1250	134	129.55	1.03435	-1.25
reverse	somatic	normal	1250	149	133.25	1.1182	-1.25
reverse	somatic	tumor	750	365	260.425	1.40156	-0.75
forward	somatic	normal	350	166	129.55	1.28136	-0.35
reverse	somatic	normal	-3150	164	133.25	1.23077	3.15
forward	somatic	normal	-3150	128	129.55	0.988036	3.15
reverse	somatic	tumor	-3150	318	260.425	1.22108	3.15
forward	somatic	tumor	-3250	239	248.7	0.960997	3.25
reverse	somatic	normal	-3250	174	133.25	1.30582	3.25
reverse	somatic	tumor	-3250	298	260.425	1.14428	3.25
reverse	somatic	tumor	-1350	240	260.425	0.921571	1.35
forward	somatic	tumor	-1350	250	248.7	1.00523	1.35
reverse	somatic	tumor	-1450	238	260.425	0.913891	1.45
reverse	somatic	normal	-1450	115	133.25	0.863039	1.45
forward	somatic	normal	-1650	138	129.55	1.06523	1.65
forward	somatic	tumor	-1550	274	248.7	1.10173	1.55
forward	somatic	normal	2650	123	129.55	0.94944	-2.65
forward	somatic	tumor	2650	298	248.7	1.19823	-2.65
forward	somatic	normal	-4350	138	129.55	1.06523	4.35
reverse	somatic	tumor	1750	279	260.425	1.07133	-1.75
forward	somatic	tumor	3850	324	248.7	1.30277	-3.85
forward	somatic	normal	3850	104	129.55	0.802779	-3.85
reverse	somatic	normal	3850	121	133.25	0.908068	-3.85
reverse	somatic	tumor	3850	317	260.425	1.21724	-3.85
forward	somatic	normal	2950	128	129.55	0.988036	-2.95
reverse	somatic	tumor	2950	327	260.425	1.25564	-2.95
reverse	somatic	tumor	2850	337	260.425	1.29404	-2.85
reverse	somatic	normal	-350	158	133.25	1.18574	0.35
forward	somatic	tumor	-350	455	248.7	1.82951	0.35
reverse	somatic	tumor	-350	355	260.425	1.36316	0.35
forward	somatic	normal	-350	182	129.55	1.40486	0.35
forward	somatic	tumor	1150	369	248.7	1.48372	-1.15
reverse	somatic	normal	1150	206	133.25	1.54597	-1.15
forward	somatic	tumor	1550	370	248.7	1.48774	-1.55
forward	somatic	normal	1550	149	129.55	1.15014	-1.55
reverse	somatic	tumor	1550	350	260.425	1.34396	-1.55
reverse	somatic	normal	-250	172	133.25	1.29081	0.25
reverse	somatic	normal	-1050	139	133.25	1.04315	1.05
reverse	somatic	normal	-950	175	133.25	1.31332	0.95
reverse	somatic	tumor	-250	358	260.425	1.37468	0.25
reverse	somatic	normal	-150	193	133.25	1.44841	0.15
reverse	somatic	tumor	-150	347	260.425	1.33244	0.15
forward	somatic	tumor	-150	447	248.7	1.79735	0.15
forward	somatic	normal	950	167	129.55	1.28908	-0.95
forward	somatic	tumor	2850	293	248.7	1.17813	-2.85
forward	somatic	normal	-3850	137	129.55	1.05751	3.85
reverse	somatic	normal	-4050	138	133.25	1.03565	4.05
reverse	somatic	normal	3350	125	133.25	0.938086	-3.35
forward	somatic	normal	3350	134	129.55	1.03435	-3.35
forward	somatic	tumor	3350	343	248.7	1.37917	-3.35
reverse	somatic	tumor	-2550	313	260.425	1.20188	2.55
reverse	somatic	normal	-2450	146	133.25	1.09568	2.45
forward	somatic	normal	-2550	131	129.55	1.01119	2.55
forward	somatic	tumor	-2550	285	248.7	1.14596	2.55
reverse	somatic	normal	-2550	156	133.25	1.17073	2.55
reverse	somatic	tumor	-2650	293	260.425	1.12508	2.65
reverse	somatic	tumor	-4850	282	260.425	1.08285	4.85
forward	somatic	normal	-4850	149	129.55	1.15014	4.85
reverse	somatic	normal	-4850	137	133.25	1.02814	4.85
reverse	somatic	normal	-4750	127	133.25	0.953096	4.75
reverse	somatic	normal	-3550	118	133.25	0.885553	3.55
reverse	somatic	normal	-3650	155	133.25	1.16323	3.65
forward	somatic	normal	2150	155	129.55	1.19645	-2.15
forward	somatic	tumor	2150	344	248.7	1.38319	-2.15
forward	somatic	tumor	2250	351	248.7	1.41134	-2.25
forward	somatic	normal	3450	121	129.55	0.934002	-3.45
reverse	somatic	normal	3450	173	133.25	1.29831	-3.45
reverse	somatic	normal	150	168	133.25	1.26079	-0.15
forward	somatic	normal	-50	180	129.55	1.38942	0.05
forward	somatic	normal	3750	128	129.55	0.988036	-3.75
forward	somatic	tumor	-4250	243	248.7	0.977081	4.25
forward	somatic	tumor	-4150	220	248.7	0.8846	4.15
forward	somatic	normal	850	152	129.55	1.17329	-0.85
reverse	somatic	tumor	850	224	260.425	0.860132	-0.85
forward	somatic	tumor	850	456	248.7	1.83353	-0.85
reverse	somatic	normal	850	117	133.25	0.878049	-0.85
forward	somatic	normal	1650	134	129.55	1.03435	-1.65
forward	somatic	tumor	-4850	241	248.7	0.969039	4.85
reverse	somatic	normal	4850	132	133.25	0.990619	-4.85
forward	somatic	normal	4850	119	129.55	0.918564	-4.85
reverse	somatic	normal	4750	145	133.25	1.08818	-4.75
forward	somatic	normal	4550	151	129.55	1.16557	-4.55
forward	somatic	normal	-4250	125	129.55	0.964878	4.25
reverse	somatic	tumor	-2150	257	260.425	0.986848	2.15
reverse	somatic	normal	-2150	128	133.25	0.9606	2.15
forward	somatic	normal	-1950	120	129.55	0.926283	1.95
reverse	somatic	normal	-4550	136	133.25	1.02064	4.55
forward	somatic	normal	1150	126	129.55	0.972597	-1.15
reverse	somatic	normal	-2350	108	133.25	0.810507	2.35
reverse	somatic	tumor	-2450	294	260.425	1.12892	2.45
forward	somatic	tumor	-1250	294	248.7	1.18215	1.25
reverse	somatic	tumor	-1250	350	260.425	1.34396	1.25
forward	somatic	tumor	-3450	278	248.7	1.11781	3.45
forward	somatic	normal	-3950	116	129.55	0.895407	3.95
reverse	somatic	normal	-4250	130	133.25	0.97561	4.25
forward	somatic	normal	3250	167	129.55	1.28908	-3.25
reverse	somatic	normal	2750	143	133.25	1.07317	-2.75
reverse	somatic	normal	-50	164	133.25	1.23077	0.05
reverse	somatic	tumor	-550	298	260.425	1.14428	0.55
reverse	somatic	normal	-550	182	133.25	1.36585	0.55
forward	somatic	normal	-550	134	129.55	1.03435	0.55
forward	somatic	normal	450	164	129.55	1.26592	-0.45
forward	somatic	tumor	3650	294	248.7	1.18215	-3.65
reverse	somatic	normal	4050	105	133.25	0.787992	-4.05
reverse	somatic	tumor	3750	343	260.425	1.31708	-3.75
reverse	somatic	tumor	3550	336	260.425	1.2902	-3.55
reverse	somatic	normal	3550	161	133.25	1.20826	-3.55
forward	somatic	normal	5050	57	129.55	0.439985	-5.05
forward	somatic	tumor	5050	155	248.7	0.623241	-5.05
forward	somatic	normal	-1350	128	129.55	0.988036	1.35
reverse	somatic	tumor	2250	360	260.425	1.38236	-2.25
reverse	somatic	normal	2250	123	133.25	0.923077	-2.25
reverse	somatic	tumor	-650	305	260.425	1.17116	0.65
reverse	somatic	normal	-650	140	133.25	1.05066	0.65
forward	somatic	tumor	2350	297	248.7	1.19421	-2.35
forward	somatic	normal	2350	117	129.55	0.903126	-2.35
reverse	somatic	normal	2450	155	133.25	1.16323	-2.45
forward	somatic	normal	2550	154	129.55	1.18873	-2.55
forward	somatic	normal	-1750	127	129.55	0.980316	1.75
forward	somatic	tumor	-1650	249	248.7	1.00121	1.65
reverse	somatic	normal	-1350	117	133.25	0.878049	1.35
reverse	somatic	normal	4150	97	133.25	0.727955	-4.15
reverse	somatic	normal	3650	139	133.25	1.04315	-3.65
reverse	somatic	normal	4650	122	133.25	0.915572	-4.65
reverse	somatic	tumor	4650	344	260.425	1.32092	-4.65
forward	somatic	tumor	-1750	268	248.7	1.0776	1.75
forward	somatic	tumor	-2050	254	248.7	1.02131	2.05
reverse	somatic	tumor	-2050	236	260.425	0.906211	2.05
reverse	somatic	normal	4950	91	133.25	0.682927	-4.95
forward	somatic	tumor	1850	353	248.7	1.41938	-1.85
forward	somatic	normal	1850	145	129.55	1.11926	-1.85
reverse	somatic	normal	1950	124	133.25	0.930582	-1.95
reverse	somatic	tumor	1950	331	260.425	1.271	-1.95
forward	somatic	tumor	2450	366	248.7	1.47165	-2.45
forward	somatic	normal	-150	178	129.55	1.37399	0.15
reverse	somatic	normal	-450	169	133.25	1.26829	0.45
reverse	somatic	tumor	-450	316	260.425	1.2134	0.45
reverse	somatic	normal	750	123	133.25	0.923077	-0.75
forward	somatic	normal	1050	124	129.55	0.957159	-1.05
forward	somatic	tumor	1050	345	248.7	1.38721	-1.05
forward	somatic	tumor	-2350	195	248.7	0.784077	2.35
forward	somatic	tumor	-2650	264	248.7	1.06152	2.65
forward	somatic	normal	-2750	108	129.55	0.833655	2.75
reverse	somatic	tumor	-2750	289	260.425	1.10972	2.75
reverse	somatic	normal	-2750	140	133.25	1.05066	2.75
reverse	somatic	tumor	2450	370	260.425	1.42075	-2.45
forward	somatic	tumor	-2850	268	248.7	1.0776	2.85
forward	somatic	tumor	-2750	261	248.7	1.04946	2.75
forward	somatic	normal	-2350	115	129.55	0.887688	2.35
forward	somatic	tumor	-2250	233	248.7	0.936872	2.25
forward	somatic	normal	-2250	104	129.55	0.802779	2.25
forward	somatic	tumor	-1950	225	248.7	0.904704	1.95
forward	somatic	tumor	-3150	309	248.7	1.24246	3.15
reverse	somatic	tumor	1050	340	260.425	1.30556	-1.05
forward	somatic	tumor	-550	375	248.7	1.50784	0.55
forward	somatic	tumor	-750	230	248.7	0.924809	0.75
reverse	somatic	normal	-2850	115	133.25	0.863039	2.85
reverse	somatic	tumor	-2850	259	260.425	0.994528	2.85
forward	somatic	tumor	-4950	98	248.7	0.394049	4.95
reverse	somatic	normal	-4150	127	133.25	0.953096	4.15
reverse	somatic	tumor	5050	212	260.425	0.814054	-5.05
reverse	somatic	normal	5050	77	133.25	0.577861	-5.05
reverse	somatic	normal	2950	144	133.25	1.08068	-2.95
forward	somatic	normal	-650	157	129.55	1.21189	0.65
reverse	somatic	tumor	-4250	273	260.425	1.04829	4.25
reverse	somatic	tumor	-4950	128	260.425	0.491504	4.95
reverse	somatic	tumor	1450	258	260.425	0.990688	-1.45
forward	somatic	normal	4650	151	129.55	1.16557	-4.65
forward	somatic	normal	-1250	155	129.55	1.19645	1.25
forward	somatic	normal	650	139	129.55	1.07294	-0.65
reverse	somatic	normal	-750	168	133.25	1.26079	0.75
forward	somatic	tumor	2550	277	248.7	1.11379	-2.55
reverse	somatic	normal	-1950	116	133.25	0.870544	1.95
forward	somatic	normal	1350	170	129.55	1.31223	-1.35
reverse	somatic	tumor	2750	313	260.425	1.20188	-2.75
forward	somatic	normal	-4950	63	129.55	0.486299	4.95
forward	somatic	normal	1450	111	129.55	0.856812	-1.45
reverse	somatic	normal	1450	102	133.25	0.765478	-1.45
forward	somatic	normal	-2650	137	129.55	1.05751	2.65
reverse	somatic	normal	-2650	137	133.25	1.02814	2.65
reverse	somatic	normal	-1250	157	133.25	1.17824	1.25
reverse	somatic	normal	650	187	133.25	1.40338	-0.65
forward	somatic	normal	2250	119	129.55	0.918564	-2.25
reverse	somatic	tumor	450	387	260.425	1.48603	-0.45
reverse	somatic	normal	-2050	125	133.25	0.938086	2.05
reverse	somatic	tumor	-2250	276	260.425	1.05981	2.25
reverse	somatic	normal	-2250	142	133.25	1.06567	2.25
reverse	somatic	tumor	-2350	225	260.425	0.863972	2.35
forward	somatic	tumor	-2450	246	248.7	0.989144	2.45
reverse	somatic	tumor	-4150	246	260.425	0.94461	4.15
forward	somatic	normal	-2050	113	129.55	0.87225	2.05
forward	somatic	tumor	-2150	245	248.7	0.985123	2.15
reverse	somatic	normal	2350	118	133.25	0.885553	-2.35
forward	somatic	normal	-4050	114	129.55	0.879969	4.05
forward	somatic	normal	550	128	129.55	0.988036	-0.55
forward	somatic	tumor	-950	299	248.7	1.20225	0.95
reverse	somatic	normal	-1850	121	133.25	0.908068	1.85
reverse	somatic	normal	3050	141	133.25	1.05816	-3.05
reverse	somatic	normal	-3050	129	133.25	0.968105	3.05
forward	somatic	normal	3550	153	129.55	1.18101	-3.55
forward	somatic	normal	-4550	116	129.55	0.895407	4.55
forward	somatic	normal	-2150	120	129.55	0.926283	2.15
reverse	somatic	normal	1550	138	133.25	1.03565	-1.55
forward	somatic	normal	-750	116	129.55	0.895407	0.75
forward	somatic	normal	-3450	175	129.55	1.35083	3.45
forward	somatic	normal	-2450	138	129.55	1.06523	2.45
forward	somatic	normal	4150	115	129.55	0.887688	-4.15
reverse	somatic	normal	-4950	54	133.25	0.405253	4.95

## Sheet: 5C
bin	unmappable.loose	n	norm.factor	norm.n
974750	FALSE	2	1.5614	1.2809
-969750	TRUE	1	3.41753	0.292609
960250	FALSE	1	1.5614	0.640449
852250	FALSE	1	1.5614	0.640449
784750	TRUE	2	3.41753	0.585218
780750	TRUE	2	3.41753	0.585218
780750	FALSE	1	1.5614	0.640449
-658250	FALSE	1	1.5614	0.640449
-629250	TRUE	1	3.41753	0.292609
503250	FALSE	2	1.5614	1.2809
198250	FALSE	1	1.5614	0.640449
182250	TRUE	1	3.41753	0.292609
178750	TRUE	2	3.41753	0.585218
171750	TRUE	1	3.41753	0.292609
171250	TRUE	1	3.41753	0.292609
169750	FALSE	1	1.5614	0.640449
168750	FALSE	1	1.5614	0.640449
165750	TRUE	3	3.41753	0.877827
162750	TRUE	3	3.41753	0.877827
141750	TRUE	2	3.41753	0.585218
122250	TRUE	1	3.41753	0.292609
97750	FALSE	3	1.5614	1.92135
-42250	TRUE	1	3.41753	0.292609
-19250	TRUE	2	3.41753	0.585218
17750	TRUE	5	3.41753	1.46304
3750	TRUE	8	3.41753	2.34087
2750	TRUE	19	3.41753	5.55957
750	TRUE	712	3.41753	208.337
-750	TRUE	266	3.41753	77.834
250	FALSE	14	1.5614	8.96629
-4250	TRUE	10	3.41753	2.92609
-5750	TRUE	11	3.41753	3.2187
-8750	TRUE	21	3.41753	6.14479
-27750	TRUE	3	3.41753	0.877827
-28250	FALSE	2	1.5614	1.2809
-43750	TRUE	3	3.41753	0.877827
-68750	FALSE	1	1.5614	0.640449
-166750	FALSE	3	1.5614	1.92135
167250	FALSE	1	1.5614	0.640449
-167250	FALSE	1	1.5614	0.640449
-170250	FALSE	2	1.5614	1.2809
-172250	TRUE	3	3.41753	0.877827
172250	FALSE	1	1.5614	0.640449
-172250	FALSE	6	1.5614	3.8427
-172750	FALSE	10	1.5614	6.40449
172750	TRUE	1	3.41753	0.292609
172750	FALSE	1	1.5614	0.640449
-172750	TRUE	1	3.41753	0.292609
-173250	FALSE	29	1.5614	18.573
173250	FALSE	11	1.5614	7.04494
-173250	TRUE	11	3.41753	3.2187
173250	TRUE	3	3.41753	0.877827
920250	TRUE	1	3.41753	0.292609
847750	FALSE	1	1.5614	0.640449
216250	FALSE	1	1.5614	0.640449
1250	TRUE	46	3.41753	13.46
250	TRUE	438	3.41753	128.163
-250	TRUE	483	3.41753	141.33
-250	FALSE	28	1.5614	17.9326
1250	FALSE	12	1.5614	7.68539
2250	TRUE	11	3.41753	3.2187
3250	TRUE	9	3.41753	2.63348
3250	FALSE	3	1.5614	1.92135
-102250	FALSE	1	1.5614	0.640449
-254250	FALSE	2	1.5614	1.2809
-256250	FALSE	1	1.5614	0.640449
-269750	FALSE	1	1.5614	0.640449
-296250	FALSE	2	1.5614	1.2809
-339250	TRUE	2	3.41753	0.585218
-371750	TRUE	2	3.41753	0.585218
-457250	TRUE	2	3.41753	0.585218
-533250	TRUE	2	3.41753	0.585218
-578750	FALSE	1	1.5614	0.640449
-580250	TRUE	1	3.41753	0.292609
-582750	FALSE	1	1.5614	0.640449
-623250	TRUE	1	3.41753	0.292609
-681750	FALSE	1	1.5614	0.640449
-686250	TRUE	1	3.41753	0.292609
-697250	FALSE	1	1.5614	0.640449
-797750	TRUE	2	3.41753	0.585218
-821250	FALSE	1	1.5614	0.640449
-841250	TRUE	1	3.41753	0.292609
-852250	TRUE	2	3.41753	0.585218
-853250	TRUE	5	3.41753	1.46304
-857250	TRUE	1	3.41753	0.292609
-938250	TRUE	1	3.41753	0.292609
913750	FALSE	1	1.5614	0.640449
771250	TRUE	1	3.41753	0.292609
-727750	FALSE	1	1.5614	0.640449
699250	TRUE	1	3.41753	0.292609
638750	TRUE	1	3.41753	0.292609
509250	TRUE	1	3.41753	0.292609
366750	TRUE	3	3.41753	0.877827
363750	TRUE	2	3.41753	0.585218
236750	FALSE	1	1.5614	0.640449
209750	TRUE	1	3.41753	0.292609
41250	FALSE	4	1.5614	2.5618
-21250	TRUE	1	3.41753	0.292609
18750	TRUE	3	3.41753	0.877827
6750	TRUE	10	3.41753	2.92609
-20250	TRUE	4	3.41753	1.17044
22750	TRUE	1	3.41753	0.292609
-91750	TRUE	2	3.41753	0.585218
-96250	TRUE	1	3.41753	0.292609
100750	TRUE	3	3.41753	0.877827
7750	TRUE	14	3.41753	4.09652
8250	TRUE	6	3.41753	1.75565
-14250	TRUE	7	3.41753	2.04826
51250	TRUE	6	3.41753	1.75565
121750	TRUE	2	3.41753	0.585218
160250	TRUE	2	3.41753	0.585218
-176250	TRUE	1	3.41753	0.292609
-180250	TRUE	1	3.41753	0.292609
-182250	TRUE	3	3.41753	0.877827
-183250	FALSE	1	1.5614	0.640449
-184250	TRUE	11	3.41753	3.2187
-184250	FALSE	8	1.5614	5.1236
184250	TRUE	1	3.41753	0.292609
-750750	TRUE	2	3.41753	0.585218
-778750	FALSE	1	1.5614	0.640449
-815250	TRUE	1	3.41753	0.292609
-860250	TRUE	2	3.41753	0.585218
-887250	TRUE	1	3.41753	0.292609
-909250	FALSE	2	1.5614	1.2809
-929250	FALSE	1	1.5614	0.640449
939250	TRUE	2	3.41753	0.585218
-980750	TRUE	1	3.41753	0.292609
979750	TRUE	1	3.41753	0.292609
-956750	TRUE	1	3.41753	0.292609
949250	FALSE	2	1.5614	1.2809
939750	FALSE	1	1.5614	0.640449
922250	FALSE	3	1.5614	1.92135
-865750	TRUE	2	3.41753	0.585218
-855750	FALSE	1	1.5614	0.640449
-838750	TRUE	2	3.41753	0.585218
-834750	FALSE	1	1.5614	0.640449
-834750	TRUE	1	3.41753	0.292609
-795750	TRUE	1	3.41753	0.292609
793750	TRUE	2	3.41753	0.585218
740750	TRUE	1	3.41753	0.292609
705750	TRUE	1	3.41753	0.292609
-700750	TRUE	1	3.41753	0.292609
-686750	TRUE	1	3.41753	0.292609
-628750	TRUE	1	3.41753	0.292609
625750	TRUE	3	3.41753	0.877827
-601250	FALSE	1	1.5614	0.640449
-584750	TRUE	1	3.41753	0.292609
-567750	FALSE	2	1.5614	1.2809
-543750	FALSE	1	1.5614	0.640449
542250	TRUE	1	3.41753	0.292609
535250	FALSE	1	1.5614	0.640449
-515750	FALSE	1	1.5614	0.640449
471750	TRUE	1	3.41753	0.292609
-462750	FALSE	1	1.5614	0.640449
-437750	TRUE	2	3.41753	0.585218
-430250	TRUE	3	3.41753	0.877827
-413750	FALSE	1	1.5614	0.640449
-411750	TRUE	2	3.41753	0.585218
411750	TRUE	1	3.41753	0.292609
-378750	TRUE	1	3.41753	0.292609
-372250	TRUE	1	3.41753	0.292609
-359250	TRUE	1	3.41753	0.292609
358250	FALSE	1	1.5614	0.640449
-357750	TRUE	1	3.41753	0.292609
-355750	TRUE	2	3.41753	0.585218
-353750	TRUE	1	3.41753	0.292609
351750	TRUE	1	3.41753	0.292609
350750	TRUE	1	3.41753	0.292609
-349750	FALSE	1	1.5614	0.640449
-322750	TRUE	1	3.41753	0.292609
322250	FALSE	1	1.5614	0.640449
321750	TRUE	4	3.41753	1.17044
321250	TRUE	1	3.41753	0.292609
320750	TRUE	4	3.41753	1.17044
319750	TRUE	2	3.41753	0.585218
319250	TRUE	1	3.41753	0.292609
-319250	TRUE	1	3.41753	0.292609
-317750	TRUE	1	3.41753	0.292609
317750	TRUE	1	3.41753	0.292609
316250	TRUE	1	3.41753	0.292609
-315250	TRUE	2	3.41753	0.585218
-314750	TRUE	4	3.41753	1.17044
313750	TRUE	1	3.41753	0.292609
-310250	TRUE	2	3.41753	0.585218
306250	TRUE	1	3.41753	0.292609
-302750	TRUE	4	3.41753	1.17044
-302750	FALSE	1	1.5614	0.640449
-301750	FALSE	1	1.5614	0.640449
-299250	FALSE	1	1.5614	0.640449
-296750	TRUE	1	3.41753	0.292609
-294250	TRUE	1	3.41753	0.292609
293750	TRUE	1	3.41753	0.292609
279750	FALSE	1	1.5614	0.640449
-279250	TRUE	2	3.41753	0.585218
275250	FALSE	1	1.5614	0.640449
-211750	FALSE	1	1.5614	0.640449
-211750	TRUE	1	3.41753	0.292609
211750	TRUE	1	3.41753	0.292609
209250	FALSE	1	1.5614	0.640449
-207250	TRUE	1	3.41753	0.292609
206750	TRUE	2	3.41753	0.585218
205750	TRUE	1	3.41753	0.292609
-205750	TRUE	2	3.41753	0.585218
205250	TRUE	1	3.41753	0.292609
205250	FALSE	1	1.5614	0.640449
-204750	TRUE	1	3.41753	0.292609
-204750	FALSE	3	1.5614	1.92135
204750	TRUE	4	3.41753	1.17044
201250	TRUE	2	3.41753	0.585218
200750	TRUE	1	3.41753	0.292609
-189750	TRUE	1	3.41753	0.292609
186750	TRUE	1	3.41753	0.292609
185750	FALSE	1	1.5614	0.640449
185750	TRUE	2	3.41753	0.585218
-184750	TRUE	2	3.41753	0.585218
182750	TRUE	1	3.41753	0.292609
-175250	FALSE	2	1.5614	1.2809
-175250	TRUE	1	3.41753	0.292609
167750	TRUE	2	3.41753	0.585218
-165750	TRUE	2	3.41753	0.585218
158250	FALSE	2	1.5614	1.2809
151750	FALSE	1	1.5614	0.640449
-143750	FALSE	2	1.5614	1.2809
138750	FALSE	1	1.5614	0.640449
-93750	TRUE	3	3.41753	0.877827
-91750	FALSE	1	1.5614	0.640449
-88750	TRUE	1	3.41753	0.292609
-63750	TRUE	5	3.41753	1.46304
-63750	FALSE	1	1.5614	0.640449
-61750	FALSE	1	1.5614	0.640449
50250	TRUE	5	3.41753	1.46304
-45750	FALSE	1	1.5614	0.640449
-39750	TRUE	1	3.41753	0.292609
38750	TRUE	3	3.41753	0.877827
-37750	FALSE	1	1.5614	0.640449
-32250	FALSE	2	1.5614	1.2809
27750	TRUE	1	3.41753	0.292609
19750	TRUE	2	3.41753	0.585218
-16750	TRUE	6	3.41753	1.75565
-9750	TRUE	8	3.41753	2.34087
-9250	TRUE	5	3.41753	1.46304
8750	TRUE	10	3.41753	2.92609
-7750	TRUE	4	3.41753	1.17044
5750	FALSE	2	1.5614	1.2809
-750	FALSE	26	1.5614	16.6517
750	FALSE	56	1.5614	35.8652
-7250	TRUE	7	3.41753	2.04826
-7250	FALSE	3	1.5614	1.92135
-26250	TRUE	1	3.41753	0.292609
32750	FALSE	3	1.5614	1.92135
43250	TRUE	2	3.41753	0.585218
44250	TRUE	2	3.41753	0.585218
53750	FALSE	3	1.5614	1.92135
53250	FALSE	1	1.5614	0.640449
-45250	TRUE	2	3.41753	0.585218
-33750	TRUE	1	3.41753	0.292609
30750	FALSE	2	1.5614	1.2809
25750	FALSE	2	1.5614	1.2809
-25250	TRUE	18	3.41753	5.26696
-24750	FALSE	3	1.5614	1.92135
24750	TRUE	2	3.41753	0.585218
24750	FALSE	1	1.5614	0.640449
-23750	FALSE	1	1.5614	0.640449
-22750	FALSE	1	1.5614	0.640449
22750	FALSE	2	1.5614	1.2809
-22250	FALSE	1	1.5614	0.640449
22250	TRUE	4	3.41753	1.17044
-21750	FALSE	3	1.5614	1.92135
20750	FALSE	2	1.5614	1.2809
-17250	FALSE	1	1.5614	0.640449
17250	TRUE	5	3.41753	1.46304
-17250	TRUE	3	3.41753	0.877827
16250	TRUE	4	3.41753	1.17044
-15250	FALSE	2	1.5614	1.2809
-13750	FALSE	2	1.5614	1.2809
-13750	TRUE	2	3.41753	0.585218
13250	TRUE	2	3.41753	0.585218
13250	FALSE	1	1.5614	0.640449
11250	TRUE	7	3.41753	2.04826
-11250	TRUE	1	3.41753	0.292609
-11250	FALSE	2	1.5614	1.2809
11250	FALSE	2	1.5614	1.2809
-10750	TRUE	6	3.41753	1.75565
-10250	FALSE	2	1.5614	1.2809
9750	TRUE	5	3.41753	1.46304
9750	FALSE	4	1.5614	2.5618
-9250	FALSE	2	1.5614	1.2809
9250	TRUE	2	3.41753	0.585218
9250	FALSE	1	1.5614	0.640449
-5250	TRUE	7	3.41753	2.04826
1750	TRUE	27	3.41753	7.90044
-1250	TRUE	57	3.41753	16.6787
-2250	TRUE	35	3.41753	10.2413
-6250	TRUE	13	3.41753	3.80391
25250	TRUE	8	3.41753	2.34087
36250	TRUE	4	3.41753	1.17044
38250	TRUE	3	3.41753	0.877827
83250	TRUE	1	3.41753	0.292609
86250	TRUE	3	3.41753	0.877827
-112250	TRUE	2	3.41753	0.585218
-115250	FALSE	5	1.5614	3.20225
115250	TRUE	1	3.41753	0.292609
115250	FALSE	3	1.5614	1.92135
-115250	TRUE	5	3.41753	1.46304
116750	FALSE	4	1.5614	2.5618
117750	FALSE	2	1.5614	1.2809
118250	FALSE	1	1.5614	0.640449
119250	FALSE	3	1.5614	1.92135
-119750	TRUE	1	3.41753	0.292609
119750	FALSE	1	1.5614	0.640449
120250	FALSE	1	1.5614	0.640449
-120250	TRUE	5	3.41753	1.46304
-120250	FALSE	2	1.5614	1.2809
120750	FALSE	1	1.5614	0.640449
-123250	FALSE	3	1.5614	1.92135
124250	FALSE	2	1.5614	1.2809
124750	FALSE	1	1.5614	0.640449
-126750	TRUE	1	3.41753	0.292609
-131750	FALSE	1	1.5614	0.640449
-131750	TRUE	1	3.41753	0.292609
-134750	TRUE	2	3.41753	0.585218
187250	FALSE	3	1.5614	1.92135
188250	TRUE	1	3.41753	0.292609
-188250	FALSE	1	1.5614	0.640449
188250	FALSE	1	1.5614	0.640449
188750	TRUE	1	3.41753	0.292609
-189750	FALSE	1	1.5614	0.640449
189750	TRUE	1	3.41753	0.292609
190250	FALSE	1	1.5614	0.640449
192750	FALSE	1	1.5614	0.640449
-247250	FALSE	1	1.5614	0.640449
257250	TRUE	2	3.41753	0.585218
282250	TRUE	1	3.41753	0.292609
294250	TRUE	2	3.41753	0.585218
315750	TRUE	2	3.41753	0.585218
-353750	FALSE	2	1.5614	1.2809
-364250	FALSE	1	1.5614	0.640449
364250	FALSE	1	1.5614	0.640449
370250	TRUE	8	3.41753	2.34087
370250	FALSE	3	1.5614	1.92135
-370250	TRUE	2	3.41753	0.585218
-370250	FALSE	2	1.5614	1.2809
-371250	TRUE	3	3.41753	0.877827
372250	TRUE	1	3.41753	0.292609
375250	FALSE	2	1.5614	1.2809
375750	FALSE	2	1.5614	1.2809
-382750	TRUE	1	3.41753	0.292609
402250	TRUE	1	3.41753	0.292609
-403750	TRUE	2	3.41753	0.585218
405250	TRUE	1	3.41753	0.292609
409250	TRUE	4	3.41753	1.17044
409250	FALSE	1	1.5614	0.640449
-414250	FALSE	1	1.5614	0.640449
-419750	TRUE	2	3.41753	0.585218
421250	TRUE	1	3.41753	0.292609
-438250	TRUE	1	3.41753	0.292609
-453250	TRUE	1	3.41753	0.292609
-488250	TRUE	1	3.41753	0.292609
536250	TRUE	3	3.41753	0.877827
-538250	TRUE	1	3.41753	0.292609
541250	FALSE	1	1.5614	0.640449
575250	FALSE	1	1.5614	0.640449
-600750	TRUE	1	3.41753	0.292609
642750	TRUE	1	3.41753	0.292609
680250	TRUE	2	3.41753	0.585218
-684250	TRUE	2	3.41753	0.585218
-693750	FALSE	1	1.5614	0.640449
-711250	TRUE	2	3.41753	0.585218
-799250	TRUE	1	3.41753	0.292609
810750	TRUE	2	3.41753	0.585218
823250	TRUE	1	3.41753	0.292609
-869250	TRUE	1	3.41753	0.292609
-873250	FALSE	1	1.5614	0.640449
880250	TRUE	1	3.41753	0.292609
-889250	TRUE	1	3.41753	0.292609
928250	TRUE	2	3.41753	0.585218
943250	TRUE	1	3.41753	0.292609
-945250	TRUE	5	3.41753	1.46304
959250	TRUE	1	3.41753	0.292609
-981750	TRUE	1	3.41753	0.292609
-985250	TRUE	2	3.41753	0.585218
-978750	FALSE	1	1.5614	0.640449
-892750	TRUE	1	3.41753	0.292609
-888750	TRUE	1	3.41753	0.292609
-864750	FALSE	3	1.5614	1.92135
853750	TRUE	1	3.41753	0.292609
847250	FALSE	1	1.5614	0.640449
737750	FALSE	1	1.5614	0.640449
-720750	TRUE	1	3.41753	0.292609
713750	TRUE	2	3.41753	0.585218
679250	TRUE	1	3.41753	0.292609
-666250	TRUE	2	3.41753	0.585218
-665750	FALSE	1	1.5614	0.640449
-664250	FALSE	2	1.5614	1.2809
641750	TRUE	1	3.41753	0.292609
618250	TRUE	1	3.41753	0.292609
-615750	FALSE	1	1.5614	0.640449
594250	TRUE	2	3.41753	0.585218
588750	TRUE	1	3.41753	0.292609
522250	FALSE	2	1.5614	1.2809
-504750	TRUE	1	3.41753	0.292609
-475750	TRUE	1	3.41753	0.292609
472750	FALSE	2	1.5614	1.2809
459750	TRUE	1	3.41753	0.292609
456750	TRUE	3	3.41753	0.877827
-418250	TRUE	1	3.41753	0.292609
-385750	TRUE	1	3.41753	0.292609
301750	FALSE	1	1.5614	0.640449
268750	TRUE	2	3.41753	0.585218
226750	FALSE	1	1.5614	0.640449
-24750	TRUE	3	3.41753	0.877827
5750	TRUE	13	3.41753	3.80391
-3750	FALSE	2	1.5614	1.2809
-2750	TRUE	16	3.41753	4.68174
116750	TRUE	8	3.41753	2.34087
151250	FALSE	1	1.5614	0.640449
-154250	TRUE	2	3.41753	0.585218
-612250	TRUE	1	3.41753	0.292609
-742750	TRUE	1	3.41753	0.292609
-873750	TRUE	1	3.41753	0.292609
697750	TRUE	3	3.41753	0.877827
567250	TRUE	2	3.41753	0.585218
436250	TRUE	5	3.41753	1.46304
300250	TRUE	3	3.41753	0.877827
-34250	FALSE	1	1.5614	0.640449
101250	TRUE	1	3.41753	0.292609
113250	FALSE	1	1.5614	0.640449
-119250	FALSE	3	1.5614	1.92135
-119250	TRUE	2	3.41753	0.585218
132250	TRUE	2	3.41753	0.585218
136250	FALSE	2	1.5614	1.2809
137250	TRUE	3	3.41753	0.877827
-141250	TRUE	1	3.41753	0.292609
168250	TRUE	7	3.41753	2.04826
-168250	TRUE	6	3.41753	1.75565
199250	TRUE	1	3.41753	0.292609
-199250	TRUE	2	3.41753	0.585218
-385250	FALSE	1	1.5614	0.640449
-389250	FALSE	2	1.5614	1.2809
418750	FALSE	1	1.5614	0.640449
-484750	TRUE	2	3.41753	0.585218
766250	TRUE	9	3.41753	2.63348
-766250	TRUE	2	3.41753	0.585218
767250	TRUE	1	3.41753	0.292609
-767250	TRUE	1	3.41753	0.292609
-795250	TRUE	1	3.41753	0.292609
825250	TRUE	2	3.41753	0.585218
-930250	TRUE	1	3.41753	0.292609
-978250	FALSE	2	1.5614	1.2809
944250	FALSE	1	1.5614	0.640449
925750	TRUE	1	3.41753	0.292609
-920750	TRUE	2	3.41753	0.585218
-896750	TRUE	3	3.41753	0.877827
-895750	FALSE	1	1.5614	0.640449
895750	TRUE	3	3.41753	0.877827
876250	TRUE	1	3.41753	0.292609
845750	TRUE	1	3.41753	0.292609
832750	TRUE	1	3.41753	0.292609
832750	FALSE	1	1.5614	0.640449
819750	TRUE	1	3.41753	0.292609
817750	TRUE	4	3.41753	1.17044
812750	TRUE	1	3.41753	0.292609
-812750	TRUE	2	3.41753	0.585218
808750	TRUE	1	3.41753	0.292609
807750	TRUE	1	3.41753	0.292609
806750	TRUE	2	3.41753	0.585218
804250	TRUE	1	3.41753	0.292609
774750	TRUE	1	3.41753	0.292609
-769250	TRUE	3	3.41753	0.877827
-764750	TRUE	1	3.41753	0.292609
-759750	TRUE	3	3.41753	0.877827
-759250	TRUE	2	3.41753	0.585218
-749750	TRUE	3	3.41753	0.877827
-749750	FALSE	6	1.5614	3.8427
749750	TRUE	13	3.41753	3.80391
366250	TRUE	1	3.41753	0.292609
-341750	TRUE	7	3.41753	2.04826
341750	FALSE	1	1.5614	0.640449
341750	TRUE	4	3.41753	1.17044
-340750	TRUE	1	3.41753	0.292609
340750	TRUE	4	3.41753	1.17044
-336750	TRUE	3	3.41753	0.877827
335750	TRUE	2	3.41753	0.585218
335750	FALSE	1	1.5614	0.640449
314250	TRUE	2	3.41753	0.585218
-303250	TRUE	4	3.41753	1.17044
301750	TRUE	2	3.41753	0.585218
-285750	FALSE	2	1.5614	1.2809
276750	TRUE	2	3.41753	0.585218
275750	TRUE	2	3.41753	0.585218
-253750	TRUE	1	3.41753	0.292609
156750	TRUE	1	3.41753	0.292609
154750	TRUE	2	3.41753	0.585218
90250	FALSE	1	1.5614	0.640449
-50250	TRUE	6	3.41753	1.75565
-43750	FALSE	4	1.5614	2.5618
-30250	FALSE	3	1.5614	1.92135
-36750	TRUE	2	3.41753	0.585218
-43250	FALSE	4	1.5614	2.5618
49750	FALSE	11	1.5614	7.04494
-55750	FALSE	3	1.5614	1.92135
-58250	TRUE	2	3.41753	0.585218
-58250	FALSE	7	1.5614	4.48315
40750	TRUE	2	3.41753	0.585218
41250	TRUE	4	3.41753	1.17044
46750	TRUE	1	3.41753	0.292609
49250	TRUE	3	3.41753	0.877827
-49250	TRUE	4	3.41753	1.17044
-49250	FALSE	8	1.5614	5.1236
-51250	FALSE	1	1.5614	0.640449
-54750	TRUE	6	3.41753	1.75565
54750	TRUE	4	3.41753	1.17044
-56250	TRUE	2	3.41753	0.585218
-56250	FALSE	2	1.5614	1.2809
-62750	TRUE	2	3.41753	0.585218
79250	TRUE	1	3.41753	0.292609
97750	TRUE	2	3.41753	0.585218
99250	FALSE	1	1.5614	0.640449
100250	TRUE	2	3.41753	0.585218
-100250	FALSE	1	1.5614	0.640449
-108250	FALSE	1	1.5614	0.640449
-114750	TRUE	1	3.41753	0.292609
129250	TRUE	1	3.41753	0.292609
-129250	TRUE	1	3.41753	0.292609
-129250	FALSE	2	1.5614	1.2809
135250	TRUE	1	3.41753	0.292609
139250	TRUE	1	3.41753	0.292609
-139250	TRUE	2	3.41753	0.585218
-139250	FALSE	2	1.5614	1.2809
-141750	TRUE	1	3.41753	0.292609
146250	TRUE	1	3.41753	0.292609
146750	TRUE	2	3.41753	0.585218
153750	TRUE	2	3.41753	0.585218
154250	FALSE	1	1.5614	0.640449
-155250	TRUE	3	3.41753	0.877827
-163250	TRUE	1	3.41753	0.292609
-171250	TRUE	1	3.41753	0.292609
172250	TRUE	2	3.41753	0.585218
-178250	TRUE	1	3.41753	0.292609
-186250	TRUE	1	3.41753	0.292609
-194250	TRUE	1	3.41753	0.292609
-198250	TRUE	2	3.41753	0.585218
-202250	TRUE	1	3.41753	0.292609
-209250	FALSE	1	1.5614	0.640449
243250	FALSE	1	1.5614	0.640449
-264250	FALSE	1	1.5614	0.640449
267250	TRUE	13	3.41753	3.80391
-296750	FALSE	1	1.5614	0.640449
-303750	FALSE	1	1.5614	0.640449
-330250	TRUE	1	3.41753	0.292609
-346250	TRUE	1	3.41753	0.292609
-352250	FALSE	1	1.5614	0.640449
356750	FALSE	3	1.5614	1.92135
-378250	TRUE	1	3.41753	0.292609
-398250	FALSE	1	1.5614	0.640449
410750	FALSE	1	1.5614	0.640449
-416250	TRUE	1	3.41753	0.292609
423250	TRUE	2	3.41753	0.585218
424250	FALSE	1	1.5614	0.640449
-431250	FALSE	1	1.5614	0.640449
-455250	FALSE	2	1.5614	1.2809
455250	TRUE	4	3.41753	1.17044
-492250	FALSE	1	1.5614	0.640449
-512250	FALSE	1	1.5614	0.640449
520250	TRUE	1	3.41753	0.292609
-522250	TRUE	3	3.41753	0.877827
524250	TRUE	1	3.41753	0.292609
-524250	TRUE	3	3.41753	0.877827
615250	TRUE	2	3.41753	0.585218
616750	TRUE	1	3.41753	0.292609
629250	FALSE	1	1.5614	0.640449
663250	FALSE	1	1.5614	0.640449
-684750	TRUE	1	3.41753	0.292609
-685250	FALSE	1	1.5614	0.640449
-711750	FALSE	1	1.5614	0.640449
-734250	TRUE	1	3.41753	0.292609
-743250	TRUE	1	3.41753	0.292609
746750	FALSE	1	1.5614	0.640449
-755250	TRUE	1	3.41753	0.292609
-760250	FALSE	2	1.5614	1.2809
872750	TRUE	3	3.41753	0.877827
-905750	TRUE	2	3.41753	0.585218
936250	TRUE	2	3.41753	0.585218
-936250	FALSE	2	1.5614	1.2809
-954250	FALSE	1	1.5614	0.640449
-950750	FALSE	1	1.5614	0.640449
921250	TRUE	2	3.41753	0.585218
-822750	TRUE	2	3.41753	0.585218
759750	TRUE	1	3.41753	0.292609
-747750	TRUE	1	3.41753	0.292609
-738250	TRUE	2	3.41753	0.585218
-721250	FALSE	1	1.5614	0.640449
715250	FALSE	1	1.5614	0.640449
-700750	FALSE	1	1.5614	0.640449
-650750	FALSE	5	1.5614	3.20225
644750	TRUE	2	3.41753	0.585218
-643250	TRUE	2	3.41753	0.585218
588750	FALSE	1	1.5614	0.640449
554250	TRUE	1	3.41753	0.292609
-519750	TRUE	1	3.41753	0.292609
-483250	TRUE	1	3.41753	0.292609
-454250	TRUE	1	3.41753	0.292609
-341250	TRUE	1	3.41753	0.292609
303750	TRUE	2	3.41753	0.585218
289250	FALSE	1	1.5614	0.640449
-276250	TRUE	4	3.41753	1.17044
-233250	TRUE	1	3.41753	0.292609
218250	TRUE	2	3.41753	0.585218
-128250	TRUE	2	3.41753	0.585218
-122250	TRUE	3	3.41753	0.877827
-100250	TRUE	2	3.41753	0.585218
-93250	TRUE	1	3.41753	0.292609
-83750	TRUE	1	3.41753	0.292609
-79250	TRUE	2	3.41753	0.585218
-78250	TRUE	1	3.41753	0.292609
-76250	TRUE	2	3.41753	0.585218
-75250	TRUE	2	3.41753	0.585218
-74250	TRUE	1	3.41753	0.292609
-37250	TRUE	2	3.41753	0.585218
20250	TRUE	2	3.41753	0.585218
35750	FALSE	1	1.5614	0.640449
76750	TRUE	1	3.41753	0.292609
148750	TRUE	1	3.41753	0.292609
173750	TRUE	2	3.41753	0.585218
187750	TRUE	3	3.41753	0.877827
-189250	TRUE	2	3.41753	0.585218
191750	TRUE	1	3.41753	0.292609
-201250	TRUE	1	3.41753	0.292609
202750	TRUE	3	3.41753	0.877827
208750	TRUE	1	3.41753	0.292609
-223250	FALSE	1	1.5614	0.640449
-236750	TRUE	4	3.41753	1.17044
237250	TRUE	3	3.41753	0.877827
238250	TRUE	2	3.41753	0.585218
245750	FALSE	2	1.5614	1.2809
245750	TRUE	9	3.41753	2.63348
-246250	TRUE	17	3.41753	4.97435
266250	TRUE	1	3.41753	0.292609
-273750	FALSE	1	1.5614	0.640449
-274250	TRUE	1	3.41753	0.292609
-8250	TRUE	1	3.41753	0.292609
7250	TRUE	5	3.41753	1.46304
-3750	TRUE	9	3.41753	2.63348
-3250	FALSE	4	1.5614	2.5618
11750	TRUE	5	3.41753	1.46304
14750	TRUE	3	3.41753	0.877827
25750	TRUE	11	3.41753	3.2187
66750	TRUE	1	3.41753	0.292609
-73250	TRUE	1	3.41753	0.292609
73750	TRUE	3	3.41753	0.877827
75250	TRUE	2	3.41753	0.585218
-77250	TRUE	1	3.41753	0.292609
77750	TRUE	5	3.41753	1.46304
77750	FALSE	2	1.5614	1.2809
-78750	FALSE	1	1.5614	0.640449
-78750	TRUE	2	3.41753	0.585218
81750	TRUE	2	3.41753	0.585218
-82250	FALSE	1	1.5614	0.640449
84750	TRUE	2	3.41753	0.585218
85750	TRUE	2	3.41753	0.585218
89750	FALSE	2	1.5614	1.2809
90750	FALSE	2	1.5614	1.2809
-91250	TRUE	2	3.41753	0.585218
110750	FALSE	2	1.5614	1.2809
114750	TRUE	3	3.41753	0.877827
-142250	FALSE	1	1.5614	0.640449
149750	TRUE	2	3.41753	0.585218
-171750	TRUE	1	3.41753	0.292609
194250	TRUE	1	3.41753	0.292609
-195250	TRUE	1	3.41753	0.292609
199750	TRUE	1	3.41753	0.292609
-213750	TRUE	1	3.41753	0.292609
221750	TRUE	3	3.41753	0.877827
222750	TRUE	6	3.41753	1.75565
232750	TRUE	1	3.41753	0.292609
-250250	FALSE	2	1.5614	1.2809
-250750	TRUE	1	3.41753	0.292609
-294750	FALSE	1	1.5614	0.640449
299750	TRUE	1	3.41753	0.292609
300750	TRUE	2	3.41753	0.585218
305250	FALSE	2	1.5614	1.2809
305750	TRUE	3	3.41753	0.877827
306750	TRUE	2	3.41753	0.585218
307750	TRUE	1	3.41753	0.292609
308750	TRUE	1	3.41753	0.292609
324750	TRUE	2	3.41753	0.585218
-347250	TRUE	2	3.41753	0.585218
347750	TRUE	1	3.41753	0.292609
358250	TRUE	1	3.41753	0.292609
382750	TRUE	2	3.41753	0.585218
-394750	FALSE	3	1.5614	1.92135
421750	TRUE	1	3.41753	0.292609
-450250	FALSE	1	1.5614	0.640449
453750	TRUE	1	3.41753	0.292609
455750	FALSE	3	1.5614	1.92135
-459250	TRUE	2	3.41753	0.585218
-461250	TRUE	1	3.41753	0.292609
-463250	TRUE	3	3.41753	0.877827
-464250	TRUE	2	3.41753	0.585218
464750	TRUE	1	3.41753	0.292609
473750	TRUE	3	3.41753	0.877827
-486250	TRUE	2	3.41753	0.585218
-489250	TRUE	7	3.41753	2.04826
-491250	TRUE	1	3.41753	0.292609
-493250	TRUE	2	3.41753	0.585218
-495750	TRUE	1	3.41753	0.292609
495750	TRUE	1	3.41753	0.292609
500250	FALSE	1	1.5614	0.640449
-502250	TRUE	1	3.41753	0.292609
-503250	TRUE	2	3.41753	0.585218
-505250	TRUE	4	3.41753	1.17044
-505750	TRUE	2	3.41753	0.585218
-506250	TRUE	4	3.41753	1.17044
506750	TRUE	1	3.41753	0.292609
-507250	TRUE	7	3.41753	2.04826
-507750	TRUE	2	3.41753	0.585218
-508250	TRUE	2	3.41753	0.585218
-508750	TRUE	1	3.41753	0.292609
-509250	TRUE	1	3.41753	0.292609
-511250	TRUE	2	3.41753	0.585218
-516250	TRUE	1	3.41753	0.292609
-518250	TRUE	3	3.41753	0.877827
-519250	TRUE	1	3.41753	0.292609
-520250	TRUE	1	3.41753	0.292609
-523250	TRUE	3	3.41753	0.877827
-525250	TRUE	5	3.41753	1.46304
526750	TRUE	1	3.41753	0.292609
529750	TRUE	2	3.41753	0.585218
-537250	TRUE	1	3.41753	0.292609
-542250	TRUE	1	3.41753	0.292609
553750	TRUE	7	3.41753	2.04826
561750	TRUE	1	3.41753	0.292609
-579750	TRUE	2	3.41753	0.585218
-592250	TRUE	1	3.41753	0.292609
-593250	TRUE	22	3.41753	6.43739
-600250	TRUE	1	3.41753	0.292609
-609250	TRUE	1	3.41753	0.292609
-615250	TRUE	1	3.41753	0.292609
-622750	TRUE	1	3.41753	0.292609
645750	TRUE	1	3.41753	0.292609
674750	FALSE	2	1.5614	1.2809
-680750	FALSE	3	1.5614	1.92135
-718250	TRUE	2	3.41753	0.585218
760250	FALSE	2	1.5614	1.2809
-813250	TRUE	1	3.41753	0.292609
-857750	FALSE	3	1.5614	1.92135
899250	TRUE	3	3.41753	0.877827
926250	TRUE	1	3.41753	0.292609
930750	TRUE	3	3.41753	0.877827
938750	TRUE	1	3.41753	0.292609
954250	TRUE	2	3.41753	0.585218
-973250	FALSE	1	1.5614	0.640449
-980250	FALSE	2	1.5614	1.2809
-14250	FALSE	1	1.5614	0.640449
-27250	TRUE	2	3.41753	0.585218
-86750	TRUE	1	3.41753	0.292609
-105250	TRUE	2	3.41753	0.585218
160750	TRUE	1	3.41753	0.292609
201750	TRUE	1	3.41753	0.292609
-207250	FALSE	1	1.5614	0.640449
208750	FALSE	1	1.5614	0.640449
216250	TRUE	1	3.41753	0.292609
234750	FALSE	2	1.5614	1.2809
242250	TRUE	2	3.41753	0.585218
254750	FALSE	1	1.5614	0.640449
342750	TRUE	1	3.41753	0.292609
-347750	FALSE	1	1.5614	0.640449
-361750	TRUE	1	3.41753	0.292609
397250	FALSE	1	1.5614	0.640449
406250	FALSE	1	1.5614	0.640449
-471250	TRUE	2	3.41753	0.585218
-472250	TRUE	2	3.41753	0.585218
-499250	FALSE	1	1.5614	0.640449
566750	FALSE	1	1.5614	0.640449
-727250	TRUE	2	3.41753	0.585218
-802750	FALSE	1	1.5614	0.640449
809750	TRUE	3	3.41753	0.877827
864750	TRUE	1	3.41753	0.292609
963250	FALSE	1	1.5614	0.640449
-998250	TRUE	1	3.41753	0.292609
14750	FALSE	2	1.5614	1.2809
98250	FALSE	1	1.5614	0.640449
-301250	FALSE	1	1.5614	0.640449
-309250	TRUE	1	3.41753	0.292609
-350750	FALSE	1	1.5614	0.640449
414250	TRUE	2	3.41753	0.585218
481750	TRUE	1	3.41753	0.292609
532750	FALSE	1	1.5614	0.640449
-801750	TRUE	2	3.41753	0.585218
-828750	FALSE	1	1.5614	0.640449
-894250	TRUE	2	3.41753	0.585218
-981250	TRUE	1	3.41753	0.292609
856750	TRUE	1	3.41753	0.292609
-984750	TRUE	3	3.41753	0.877827
-975750	FALSE	1	1.5614	0.640449
970250	TRUE	1	3.41753	0.292609
963250	TRUE	2	3.41753	0.585218
-889750	TRUE	1	3.41753	0.292609
880750	TRUE	1	3.41753	0.292609
-867250	FALSE	2	1.5614	1.2809
842250	TRUE	1	3.41753	0.292609
-794750	TRUE	2	3.41753	0.585218
-696750	FALSE	1	1.5614	0.640449
-687750	TRUE	1	3.41753	0.292609
-675750	FALSE	1	1.5614	0.640449
673250	TRUE	1	3.41753	0.292609
-635250	FALSE	1	1.5614	0.640449
618750	FALSE	2	1.5614	1.2809
610750	TRUE	1	3.41753	0.292609
596750	FALSE	1	1.5614	0.640449
555750	FALSE	1	1.5614	0.640449
544750	FALSE	1	1.5614	0.640449
-521750	TRUE	1	3.41753	0.292609
513750	TRUE	1	3.41753	0.292609
499750	FALSE	1	1.5614	0.640449
-461750	TRUE	1	3.41753	0.292609
-459750	TRUE	1	3.41753	0.292609
436750	TRUE	2	3.41753	0.585218
422750	FALSE	1	1.5614	0.640449
382250	TRUE	1	3.41753	0.292609
-305250	TRUE	3	3.41753	0.877827
-250250	TRUE	1	3.41753	0.292609
231250	FALSE	1	1.5614	0.640449
-182750	TRUE	1	3.41753	0.292609
155750	TRUE	1	3.41753	0.292609
-151750	TRUE	2	3.41753	0.585218
-90750	TRUE	2	3.41753	0.585218
-80250	FALSE	1	1.5614	0.640449
-65750	FALSE	3	1.5614	1.92135
41750	FALSE	1	1.5614	0.640449
-12750	TRUE	2	3.41753	0.585218
-6750	TRUE	8	3.41753	2.34087
65250	TRUE	2	3.41753	0.585218
88250	TRUE	2	3.41753	0.585218
-99750	TRUE	3	3.41753	0.877827
109750	FALSE	1	1.5614	0.640449
-140250	FALSE	2	1.5614	1.2809
239250	TRUE	3	3.41753	0.877827
239750	FALSE	1	1.5614	0.640449
266750	FALSE	2	1.5614	1.2809
-332750	FALSE	1	1.5614	0.640449
511750	FALSE	1	1.5614	0.640449
626750	TRUE	1	3.41753	0.292609
-718250	FALSE	1	1.5614	0.640449
-816750	FALSE	1	1.5614	0.640449
820750	FALSE	1	1.5614	0.640449
977250	FALSE	1	1.5614	0.640449
970250	FALSE	1	1.5614	0.640449
-966250	FALSE	2	1.5614	1.2809
-809750	FALSE	1	1.5614	0.640449
-779250	TRUE	1	3.41753	0.292609
-777750	TRUE	1	3.41753	0.292609
-664250	TRUE	1	3.41753	0.292609
575250	TRUE	1	3.41753	0.292609
-483750	TRUE	1	3.41753	0.292609
-423250	FALSE	1	1.5614	0.640449
285250	FALSE	1	1.5614	0.640449
233750	TRUE	2	3.41753	0.585218
-109250	TRUE	1	3.41753	0.292609
47750	FALSE	3	1.5614	1.92135
2250	FALSE	2	1.5614	1.2809
-4750	TRUE	14	3.41753	4.09652
23250	TRUE	3	3.41753	0.877827
28750	TRUE	4	3.41753	1.17044
59750	TRUE	2	3.41753	0.585218
60250	TRUE	4	3.41753	1.17044
60250	FALSE	1	1.5614	0.640449
-66750	TRUE	2	3.41753	0.585218
68250	FALSE	1	1.5614	0.640449
69250	TRUE	1	3.41753	0.292609
70250	TRUE	16	3.41753	4.68174
70250	FALSE	1	1.5614	0.640449
-70250	TRUE	3	3.41753	0.877827
72750	TRUE	2	3.41753	0.585218
80750	FALSE	1	1.5614	0.640449
81250	TRUE	1	3.41753	0.292609
128750	FALSE	1	1.5614	0.640449
-155750	FALSE	2	1.5614	1.2809
159250	FALSE	1	1.5614	0.640449
-160750	FALSE	1	1.5614	0.640449
-165750	FALSE	1	1.5614	0.640449
177250	FALSE	1	1.5614	0.640449
201750	FALSE	1	1.5614	0.640449
-364250	TRUE	1	3.41753	0.292609
365750	TRUE	1	3.41753	0.292609
371750	TRUE	1	3.41753	0.292609
374750	TRUE	2	3.41753	0.585218
-374750	TRUE	1	3.41753	0.292609
378250	FALSE	1	1.5614	0.640449
-379750	TRUE	1	3.41753	0.292609
379750	TRUE	1	3.41753	0.292609
381250	TRUE	24	3.41753	7.02261
381250	FALSE	2	1.5614	1.2809
-381250	TRUE	2	3.41753	0.585218
-382250	TRUE	1	3.41753	0.292609
383250	TRUE	2	3.41753	0.585218
384250	TRUE	1	3.41753	0.292609
386250	TRUE	2	3.41753	0.585218
475250	TRUE	2	3.41753	0.585218
500250	TRUE	1	3.41753	0.292609
-529250	FALSE	1	1.5614	0.640449
-575250	TRUE	1	3.41753	0.292609
576250	TRUE	1	3.41753	0.292609
579750	FALSE	1	1.5614	0.640449
-580250	FALSE	1	1.5614	0.640449
610250	TRUE	1	3.41753	0.292609
625250	TRUE	1	3.41753	0.292609
649250	TRUE	3	3.41753	0.877827
-649250	TRUE	4	3.41753	1.17044
652250	TRUE	3	3.41753	0.877827
663250	TRUE	1	3.41753	0.292609
677250	FALSE	1	1.5614	0.640449
-698250	TRUE	1	3.41753	0.292609
840250	FALSE	1	1.5614	0.640449
845250	TRUE	2	3.41753	0.585218
882250	TRUE	2	3.41753	0.585218
931250	TRUE	1	3.41753	0.292609
941250	TRUE	1	3.41753	0.292609
941250	FALSE	1	1.5614	0.640449
-942250	TRUE	2	3.41753	0.585218
-969250	TRUE	1	3.41753	0.292609
-972750	FALSE	1	1.5614	0.640449
-940750	TRUE	1	3.41753	0.292609
-915750	TRUE	1	3.41753	0.292609
886750	FALSE	1	1.5614	0.640449
840750	TRUE	2	3.41753	0.585218
-839750	TRUE	3	3.41753	0.877827
-836250	FALSE	1	1.5614	0.640449
835750	FALSE	1	1.5614	0.640449
-805750	TRUE	1	3.41753	0.292609
-790750	TRUE	1	3.41753	0.292609
-766750	TRUE	2	3.41753	0.585218
766750	TRUE	1	3.41753	0.292609
-763750	TRUE	2	3.41753	0.585218
-752750	TRUE	1	3.41753	0.292609
-738750	FALSE	1	1.5614	0.640449
717750	TRUE	1	3.41753	0.292609
-575750	FALSE	1	1.5614	0.640449
-570750	TRUE	1	3.41753	0.292609
-533750	TRUE	1	3.41753	0.292609
-474750	TRUE	1	3.41753	0.292609
-474750	FALSE	1	1.5614	0.640449
-452750	TRUE	1	3.41753	0.292609
446750	TRUE	2	3.41753	0.585218
443250	FALSE	1	1.5614	0.640449
358750	FALSE	1	1.5614	0.640449
256750	TRUE	1	3.41753	0.292609
-242250	TRUE	1	3.41753	0.292609
-175750	FALSE	3	1.5614	1.92135
153250	TRUE	1	3.41753	0.292609
-106750	TRUE	1	3.41753	0.292609
-86750	FALSE	1	1.5614	0.640449
-80750	TRUE	3	3.41753	0.877827
-79750	TRUE	1	3.41753	0.292609
-48750	TRUE	4	3.41753	1.17044
41750	TRUE	6	3.41753	1.75565
35250	TRUE	1	3.41753	0.292609
-29750	FALSE	1	1.5614	0.640449
29750	TRUE	8	3.41753	2.34087
-112250	FALSE	1	1.5614	0.640449
110250	TRUE	1	3.41753	0.292609
108750	FALSE	1	1.5614	0.640449
-108250	TRUE	2	3.41753	0.585218
107750	TRUE	4	3.41753	1.17044
106750	FALSE	1	1.5614	0.640449
-106750	FALSE	2	1.5614	1.2809
-105250	FALSE	2	1.5614	1.2809
-104750	TRUE	7	3.41753	2.04826
-103750	TRUE	2	3.41753	0.585218
-99750	FALSE	1	1.5614	0.640449
97250	TRUE	2	3.41753	0.585218
-97250	TRUE	1	3.41753	0.292609
-96250	FALSE	2	1.5614	1.2809
-95750	TRUE	1	3.41753	0.292609
-94750	FALSE	1	1.5614	0.640449
93750	FALSE	1	1.5614	0.640449
93250	FALSE	2	1.5614	1.2809
-89750	FALSE	2	1.5614	1.2809
-87250	FALSE	1	1.5614	0.640449
78250	FALSE	1	1.5614	0.640449
-76250	FALSE	1	1.5614	0.640449
-74250	FALSE	2	1.5614	1.2809
72250	FALSE	1	1.5614	0.640449
-71750	FALSE	1	1.5614	0.640449
-70750	FALSE	2	1.5614	1.2809
67750	FALSE	2	1.5614	1.2809
59750	FALSE	1	1.5614	0.640449
57750	TRUE	1	3.41753	0.292609
-57250	TRUE	2	3.41753	0.585218
-44750	TRUE	1	3.41753	0.292609
-1250	FALSE	9	1.5614	5.76404
67250	TRUE	2	3.41753	0.585218
118250	TRUE	2	3.41753	0.585218
395750	FALSE	1	1.5614	0.640449
-571250	FALSE	1	1.5614	0.640449
-660250	TRUE	1	3.41753	0.292609
-690250	TRUE	1	3.41753	0.292609
801250	FALSE	1	1.5614	0.640449
812250	FALSE	1	1.5614	0.640449
816250	TRUE	1	3.41753	0.292609
-817250	TRUE	2	3.41753	0.585218
826750	FALSE	1	1.5614	0.640449
-829250	FALSE	1	1.5614	0.640449
840750	FALSE	1	1.5614	0.640449
-877250	TRUE	1	3.41753	0.292609
987250	FALSE	1	1.5614	0.640449
943750	TRUE	1	3.41753	0.292609
-911250	TRUE	1	3.41753	0.292609
-893750	TRUE	1	3.41753	0.292609
892750	FALSE	1	1.5614	0.640449
868750	FALSE	1	1.5614	0.640449
-841250	FALSE	1	1.5614	0.640449
-821750	TRUE	1	3.41753	0.292609
788750	TRUE	1	3.41753	0.292609
737750	TRUE	2	3.41753	0.585218
-732750	TRUE	1	3.41753	0.292609
721750	FALSE	1	1.5614	0.640449
721750	TRUE	3	3.41753	0.877827
702250	FALSE	1	1.5614	0.640449
696750	TRUE	1	3.41753	0.292609
-689750	TRUE	7	3.41753	2.04826
-689750	FALSE	3	1.5614	1.92135
689750	TRUE	22	3.41753	6.43739
689750	FALSE	11	1.5614	7.04494
688750	FALSE	1	1.5614	0.640449
688250	FALSE	1	1.5614	0.640449
684750	TRUE	1	3.41753	0.292609
684250	TRUE	2	3.41753	0.585218
683750	TRUE	2	3.41753	0.585218
683750	FALSE	2	1.5614	1.2809
683250	TRUE	2	3.41753	0.585218
-683250	FALSE	2	1.5614	1.2809
655250	FALSE	1	1.5614	0.640449
-648750	FALSE	3	1.5614	1.92135
-647750	FALSE	2	1.5614	1.2809
636750	TRUE	2	3.41753	0.585218
-513750	TRUE	1	3.41753	0.292609
-494750	TRUE	18	3.41753	5.26696
494750	TRUE	24	3.41753	7.02261
494750	FALSE	1	1.5614	0.640449
-493750	TRUE	2	3.41753	0.585218
493750	TRUE	5	3.41753	1.46304
492750	TRUE	3	3.41753	0.877827
-491750	TRUE	2	3.41753	0.585218
489750	TRUE	1	3.41753	0.292609
486750	TRUE	1	3.41753	0.292609
484750	TRUE	1	3.41753	0.292609
478250	TRUE	1	3.41753	0.292609
-471750	TRUE	1	3.41753	0.292609
457750	FALSE	1	1.5614	0.640449
439750	TRUE	1	3.41753	0.292609
433750	FALSE	1	1.5614	0.640449
411250	FALSE	1	1.5614	0.640449
-406750	FALSE	2	1.5614	1.2809
401750	TRUE	1	3.41753	0.292609
383750	TRUE	1	3.41753	0.292609
-375750	FALSE	1	1.5614	0.640449
-345250	FALSE	1	1.5614	0.640449
331250	TRUE	1	3.41753	0.292609
330750	FALSE	1	1.5614	0.640449
316750	TRUE	2	3.41753	0.585218
309250	TRUE	1	3.41753	0.292609
296750	FALSE	1	1.5614	0.640449
293750	FALSE	1	1.5614	0.640449
292750	FALSE	1	1.5614	0.640449
-290250	FALSE	3	1.5614	1.92135
288750	FALSE	2	1.5614	1.2809
-288750	FALSE	1	1.5614	0.640449
-288250	FALSE	1	1.5614	0.640449
-287750	FALSE	1	1.5614	0.640449
284750	FALSE	2	1.5614	1.2809
282750	TRUE	1	3.41753	0.292609
275750	FALSE	1	1.5614	0.640449
-274750	FALSE	1	1.5614	0.640449
-254750	TRUE	1	3.41753	0.292609
-224750	TRUE	1	3.41753	0.292609
-216750	TRUE	2	3.41753	0.585218
212750	TRUE	1	3.41753	0.292609
-200750	TRUE	1	3.41753	0.292609
-169250	FALSE	1	1.5614	0.640449
164750	TRUE	1	3.41753	0.292609
158750	TRUE	2	3.41753	0.585218
156250	TRUE	1	3.41753	0.292609
134750	FALSE	2	1.5614	1.2809
128250	TRUE	2	3.41753	0.585218
127750	TRUE	1	3.41753	0.292609
-125250	FALSE	1	1.5614	0.640449
92250	TRUE	1	3.41753	0.292609
87750	TRUE	1	3.41753	0.292609
-61750	TRUE	1	3.41753	0.292609
34750	TRUE	2	3.41753	0.585218
-26750	FALSE	2	1.5614	1.2809
-11750	TRUE	6	3.41753	1.75565
-6250	FALSE	1	1.5614	0.640449
32250	FALSE	1	1.5614	0.640449
-52250	TRUE	3	3.41753	0.877827
-52250	FALSE	1	1.5614	0.640449
52250	FALSE	2	1.5614	1.2809
-52750	FALSE	1	1.5614	0.640449
-53250	FALSE	3	1.5614	1.92135
-53250	TRUE	1	3.41753	0.292609
-53750	FALSE	2	1.5614	1.2809
54750	FALSE	2	1.5614	1.2809
57250	FALSE	2	1.5614	1.2809
58250	FALSE	2	1.5614	1.2809
58250	TRUE	2	3.41753	0.585218
58750	FALSE	2	1.5614	1.2809
-59750	FALSE	2	1.5614	1.2809
-60250	FALSE	2	1.5614	1.2809
-62250	FALSE	3	1.5614	1.92135
-62250	TRUE	1	3.41753	0.292609
-62750	FALSE	2	1.5614	1.2809
62750	FALSE	1	1.5614	0.640449
-63250	FALSE	1	1.5614	0.640449
63750	FALSE	1	1.5614	0.640449
-64250	TRUE	1	3.41753	0.292609
-64750	FALSE	2	1.5614	1.2809
64750	FALSE	1	1.5614	0.640449
-65250	FALSE	4	1.5614	2.5618
66250	FALSE	1	1.5614	0.640449
-66250	FALSE	2	1.5614	1.2809
66250	TRUE	2	3.41753	0.585218
-66750	FALSE	2	1.5614	1.2809
66750	FALSE	1	1.5614	0.640449
75750	FALSE	1	1.5614	0.640449
-75750	FALSE	2	1.5614	1.2809
51750	FALSE	4	1.5614	2.5618
-38750	TRUE	2	3.41753	0.585218
-37250	FALSE	1	1.5614	0.640449
-5750	FALSE	2	1.5614	1.2809
-3250	TRUE	7	3.41753	2.04826
4250	FALSE	2	1.5614	1.2809
-25750	FALSE	7	1.5614	4.48315
-31250	FALSE	2	1.5614	1.2809
-55250	TRUE	1	3.41753	0.292609
-84250	TRUE	1	3.41753	0.292609
-85250	FALSE	1	1.5614	0.640449
114250	TRUE	2	3.41753	0.585218
-127750	FALSE	1	1.5614	0.640449
-134250	TRUE	1	3.41753	0.292609
-149250	TRUE	2	3.41753	0.585218
-152250	FALSE	1	1.5614	0.640449
165250	FALSE	1	1.5614	0.640449
-177250	TRUE	1	3.41753	0.292609
-178250	FALSE	2	1.5614	1.2809
-179250	TRUE	1	3.41753	0.292609
-181250	TRUE	1	3.41753	0.292609
-183250	TRUE	1	3.41753	0.292609
-200250	TRUE	1	3.41753	0.292609
209250	TRUE	2	3.41753	0.585218
-218750	TRUE	1	3.41753	0.292609
-226750	TRUE	2	3.41753	0.585218
-232250	FALSE	1	1.5614	0.640449
-238250	TRUE	1	3.41753	0.292609
-239250	TRUE	2	3.41753	0.585218
241250	TRUE	1	3.41753	0.292609
260250	FALSE	1	1.5614	0.640449
-285250	TRUE	1	3.41753	0.292609
-288250	TRUE	1	3.41753	0.292609
-307250	TRUE	1	3.41753	0.292609
336750	FALSE	1	1.5614	0.640449
-365250	TRUE	1	3.41753	0.292609
369250	FALSE	1	1.5614	0.640449
-414250	TRUE	2	3.41753	0.585218
426250	TRUE	1	3.41753	0.292609
435250	TRUE	3	3.41753	0.877827
-465250	TRUE	2	3.41753	0.585218
-520750	TRUE	2	3.41753	0.585218
-531250	TRUE	2	3.41753	0.585218
534250	TRUE	1	3.41753	0.292609
553250	TRUE	1	3.41753	0.292609
-566750	FALSE	1	1.5614	0.640449
568250	FALSE	1	1.5614	0.640449
-584250	TRUE	1	3.41753	0.292609
-598250	TRUE	1	3.41753	0.292609
-620750	TRUE	1	3.41753	0.292609
-631250	FALSE	1	1.5614	0.640449
666250	FALSE	2	1.5614	1.2809
-706250	FALSE	1	1.5614	0.640449
-707750	TRUE	1	3.41753	0.292609
-731250	TRUE	2	3.41753	0.585218
738750	FALSE	1	1.5614	0.640449
790250	TRUE	1	3.41753	0.292609
814250	TRUE	1	3.41753	0.292609
827250	TRUE	1	3.41753	0.292609
-982750	FALSE	1	1.5614	0.640449
-986250	TRUE	1	3.41753	0.292609
-997250	TRUE	1	3.41753	0.292609
995750	TRUE	1	3.41753	0.292609
-990750	FALSE	3	1.5614	1.92135
-926750	TRUE	2	3.41753	0.585218
-915750	FALSE	2	1.5614	1.2809
903250	FALSE	1	1.5614	0.640449
892750	TRUE	1	3.41753	0.292609
891750	TRUE	1	3.41753	0.292609
-885750	TRUE	2	3.41753	0.585218
873750	TRUE	1	3.41753	0.292609
-870750	TRUE	2	3.41753	0.585218
-806750	TRUE	1	3.41753	0.292609
806250	FALSE	1	1.5614	0.640449
797750	TRUE	1	3.41753	0.292609
747250	FALSE	1	1.5614	0.640449
-744750	FALSE	1	1.5614	0.640449
-674250	TRUE	1	3.41753	0.292609
-662750	FALSE	1	1.5614	0.640449
-662250	TRUE	1	3.41753	0.292609
654750	TRUE	1	3.41753	0.292609
-654250	FALSE	1	1.5614	0.640449
629750	FALSE	1	1.5614	0.640449
-580750	TRUE	1	3.41753	0.292609
571250	TRUE	1	3.41753	0.292609
-559750	TRUE	2	3.41753	0.585218
-547250	TRUE	1	3.41753	0.292609
-531750	TRUE	2	3.41753	0.585218
-499750	TRUE	1	3.41753	0.292609
-480750	FALSE	1	1.5614	0.640449
460750	FALSE	1	1.5614	0.640449
-457750	TRUE	1	3.41753	0.292609
419750	TRUE	2	3.41753	0.585218
-383750	FALSE	1	1.5614	0.640449
374250	TRUE	1	3.41753	0.292609
345750	FALSE	1	1.5614	0.640449
-337750	TRUE	1	3.41753	0.292609
-330750	TRUE	1	3.41753	0.292609
-293250	FALSE	1	1.5614	0.640449
-277750	FALSE	1	1.5614	0.640449
-264750	TRUE	1	3.41753	0.292609
264750	TRUE	1	3.41753	0.292609
180750	FALSE	1	1.5614	0.640449
-159750	TRUE	1	3.41753	0.292609
157750	FALSE	1	1.5614	0.640449
157250	TRUE	1	3.41753	0.292609
-144250	FALSE	2	1.5614	1.2809
-136250	FALSE	1	1.5614	0.640449
133250	TRUE	1	3.41753	0.292609
-125750	TRUE	4	3.41753	1.17044
93750	TRUE	1	3.41753	0.292609
77250	TRUE	2	3.41753	0.585218
-53750	TRUE	3	3.41753	0.877827
-35750	FALSE	3	1.5614	1.92135
-20750	FALSE	1	1.5614	0.640449
-19750	TRUE	1	3.41753	0.292609
4250	TRUE	10	3.41753	2.92609
2750	FALSE	1	1.5614	0.640449
39250	TRUE	2	3.41753	0.585218
-50750	FALSE	2	1.5614	1.2809
56750	FALSE	3	1.5614	1.92135
-57750	TRUE	2	3.41753	0.585218
49250	FALSE	9	1.5614	5.76404
48750	FALSE	3	1.5614	1.92135
-48750	FALSE	5	1.5614	3.20225
-48250	TRUE	1	3.41753	0.292609
-46750	TRUE	1	3.41753	0.292609
46250	TRUE	1	3.41753	0.292609
-45250	FALSE	1	1.5614	0.640449
44750	FALSE	2	1.5614	1.2809
-44750	FALSE	1	1.5614	0.640449
-44250	FALSE	1	1.5614	0.640449
43750	TRUE	2	3.41753	0.585218
43250	FALSE	3	1.5614	1.92135
42250	TRUE	1	3.41753	0.292609
-41750	FALSE	2	1.5614	1.2809
-41250	FALSE	1	1.5614	0.640449
40750	FALSE	1	1.5614	0.640449
-40750	FALSE	1	1.5614	0.640449
-40750	TRUE	2	3.41753	0.585218
6250	TRUE	4	3.41753	1.17044
-27250	FALSE	1	1.5614	0.640449
48250	FALSE	1	1.5614	0.640449
63250	TRUE	5	3.41753	1.46304
-79250	FALSE	1	1.5614	0.640449
100750	FALSE	1	1.5614	0.640449
-107250	TRUE	1	3.41753	0.292609
-135250	FALSE	1	1.5614	0.640449
-139750	FALSE	2	1.5614	1.2809
-145250	FALSE	1	1.5614	0.640449
-149250	FALSE	1	1.5614	0.640449
-150250	TRUE	1	3.41753	0.292609
-176250	FALSE	1	1.5614	0.640449
-185250	FALSE	1	1.5614	0.640449
192750	TRUE	2	3.41753	0.585218
195250	TRUE	1	3.41753	0.292609
196250	TRUE	2	3.41753	0.585218
202250	FALSE	1	1.5614	0.640449
203250	FALSE	1	1.5614	0.640449
210250	FALSE	1	1.5614	0.640449
-235250	FALSE	1	1.5614	0.640449
-235750	FALSE	1	1.5614	0.640449
-236250	FALSE	2	1.5614	1.2809
-241250	TRUE	2	3.41753	0.585218
255250	TRUE	1	3.41753	0.292609
263250	TRUE	1	3.41753	0.292609
-282250	TRUE	1	3.41753	0.292609
-301250	TRUE	1	3.41753	0.292609
328250	TRUE	1	3.41753	0.292609
-329750	FALSE	1	1.5614	0.640449
-357250	TRUE	2	3.41753	0.585218
-362250	TRUE	1	3.41753	0.292609
-380250	TRUE	1	3.41753	0.292609
410250	TRUE	2	3.41753	0.585218
-415250	FALSE	1	1.5614	0.640449
422750	TRUE	3	3.41753	0.877827
436250	FALSE	1	1.5614	0.640449
447250	TRUE	2	3.41753	0.585218
-465750	TRUE	2	3.41753	0.585218
471750	FALSE	1	1.5614	0.640449
-511750	TRUE	1	3.41753	0.292609
523250	TRUE	1	3.41753	0.292609
596750	TRUE	1	3.41753	0.292609
-613250	TRUE	1	3.41753	0.292609
616750	FALSE	1	1.5614	0.640449
624250	FALSE	1	1.5614	0.640449
628750	TRUE	1	3.41753	0.292609
-633250	FALSE	1	1.5614	0.640449
-650250	TRUE	2	3.41753	0.585218
-652250	TRUE	1	3.41753	0.292609
-655750	TRUE	1	3.41753	0.292609
-669750	TRUE	1	3.41753	0.292609
674750	TRUE	2	3.41753	0.585218
-678250	TRUE	1	3.41753	0.292609
-681250	FALSE	1	1.5614	0.640449
692250	TRUE	1	3.41753	0.292609
-724750	FALSE	1	1.5614	0.640449
745250	TRUE	4	3.41753	1.17044
-748250	TRUE	1	3.41753	0.292609
-751250	TRUE	1	3.41753	0.292609
-798250	TRUE	1	3.41753	0.292609
818250	FALSE	3	1.5614	1.92135
-825250	TRUE	4	3.41753	1.17044
843250	TRUE	2	3.41753	0.585218
849250	TRUE	1	3.41753	0.292609
-860250	FALSE	3	1.5614	1.92135
-879750	TRUE	2	3.41753	0.585218
883250	TRUE	1	3.41753	0.292609
-893250	FALSE	1	1.5614	0.640449
-896250	TRUE	1	3.41753	0.292609
902250	TRUE	1	3.41753	0.292609
-904250	FALSE	1	1.5614	0.640449
-911250	FALSE	1	1.5614	0.640449
-922250	FALSE	2	1.5614	1.2809
-925750	FALSE	1	1.5614	0.640449
-934750	FALSE	1	1.5614	0.640449
-941250	TRUE	1	3.41753	0.292609
-943250	FALSE	1	1.5614	0.640449
-950250	TRUE	1	3.41753	0.292609
-975250	TRUE	1	3.41753	0.292609
-976250	FALSE	1	1.5614	0.640449
-982250	TRUE	2	3.41753	0.585218
-983250	TRUE	1	3.41753	0.292609
995250	FALSE	1	1.5614	0.640449
-996250	TRUE	2	3.41753	0.585218
993250	TRUE	1	3.41753	0.292609
-988250	TRUE	1	3.41753	0.292609
894750	TRUE	1	3.41753	0.292609
877250	FALSE	1	1.5614	0.640449
-839250	TRUE	2	3.41753	0.585218
-830250	TRUE	1	3.41753	0.292609
-803250	FALSE	1	1.5614	0.640449
800250	FALSE	1	1.5614	0.640449
785250	FALSE	1	1.5614	0.640449
-757250	FALSE	1	1.5614	0.640449
742750	FALSE	1	1.5614	0.640449
742250	TRUE	2	3.41753	0.585218
671250	FALSE	1	1.5614	0.640449
649750	FALSE	1	1.5614	0.640449
636250	FALSE	2	1.5614	1.2809
630750	TRUE	1	3.41753	0.292609
-627250	TRUE	1	3.41753	0.292609
-603250	FALSE	1	1.5614	0.640449
578250	TRUE	1	3.41753	0.292609
-549750	FALSE	1	1.5614	0.640449
-514250	FALSE	1	1.5614	0.640449
484250	TRUE	1	3.41753	0.292609
456750	FALSE	1	1.5614	0.640449
-446250	TRUE	1	3.41753	0.292609
426250	FALSE	1	1.5614	0.640449
-394250	TRUE	1	3.41753	0.292609
-329250	TRUE	1	3.41753	0.292609
-316250	TRUE	1	3.41753	0.292609
-259250	TRUE	2	3.41753	0.585218
-243750	FALSE	1	1.5614	0.640449
-219250	FALSE	1	1.5614	0.640449
214250	TRUE	1	3.41753	0.292609
-210250	TRUE	1	3.41753	0.292609
210250	TRUE	2	3.41753	0.585218
-187250	TRUE	5	3.41753	1.46304
-103750	FALSE	1	1.5614	0.640449
-76750	FALSE	1	1.5614	0.640449
50250	FALSE	6	1.5614	3.8427
49750	TRUE	3	3.41753	0.877827
-49750	TRUE	4	3.41753	1.17044
-49750	FALSE	5	1.5614	3.20225
45750	TRUE	5	3.41753	1.46304
45750	FALSE	3	1.5614	1.92135
44250	FALSE	2	1.5614	1.2809
-21750	TRUE	2	3.41753	0.585218
-29750	TRUE	1	3.41753	0.292609
-31750	TRUE	1	3.41753	0.292609
32750	TRUE	3	3.41753	0.877827
39750	TRUE	2	3.41753	0.585218
43750	FALSE	1	1.5614	0.640449
-44250	TRUE	1	3.41753	0.292609
108250	TRUE	2	3.41753	0.585218
-110250	TRUE	1	3.41753	0.292609
114250	FALSE	1	1.5614	0.640449
-116250	TRUE	1	3.41753	0.292609
-125250	TRUE	1	3.41753	0.292609
-143250	TRUE	2	3.41753	0.585218
-161250	TRUE	1	3.41753	0.292609
165250	TRUE	1	3.41753	0.292609
168250	FALSE	1	1.5614	0.640449
-208250	TRUE	2	3.41753	0.585218
-215250	TRUE	1	3.41753	0.292609
237250	FALSE	1	1.5614	0.640449
-240250	TRUE	1	3.41753	0.292609
-261250	TRUE	2	3.41753	0.585218
-268250	FALSE	1	1.5614	0.640449
-300250	FALSE	1	1.5614	0.640449
-323250	TRUE	3	3.41753	0.877827
-325250	TRUE	6	3.41753	1.75565
-328250	TRUE	2	3.41753	0.585218
-331250	TRUE	1	3.41753	0.292609
-332250	TRUE	1	3.41753	0.292609
-340250	TRUE	2	3.41753	0.585218
-344250	TRUE	2	3.41753	0.585218
394750	TRUE	1	3.41753	0.292609
399750	TRUE	1	3.41753	0.292609
461750	TRUE	1	3.41753	0.292609
477250	FALSE	1	1.5614	0.640449
-534250	TRUE	1	3.41753	0.292609
-553250	TRUE	3	3.41753	0.877827
554750	FALSE	1	1.5614	0.640449
-558250	TRUE	1	3.41753	0.292609
-614750	FALSE	1	1.5614	0.640449
702750	TRUE	2	3.41753	0.585218
-713250	TRUE	1	3.41753	0.292609
-751750	FALSE	2	1.5614	1.2809
802750	FALSE	1	1.5614	0.640449
816750	TRUE	1	3.41753	0.292609
-862750	TRUE	1	3.41753	0.292609
-876250	TRUE	1	3.41753	0.292609
973750	FALSE	1	1.5614	0.640449
-941750	TRUE	1	3.41753	0.292609
919750	TRUE	1	3.41753	0.292609
-886750	TRUE	1	3.41753	0.292609
837750	TRUE	1	3.41753	0.292609
827750	FALSE	1	1.5614	0.640449
815750	TRUE	1	3.41753	0.292609
-787250	FALSE	1	1.5614	0.640449
-785250	TRUE	1	3.41753	0.292609
-726750	TRUE	1	3.41753	0.292609
-705750	TRUE	1	3.41753	0.292609
688250	TRUE	1	3.41753	0.292609
-683750	FALSE	1	1.5614	0.640449
652750	TRUE	1	3.41753	0.292609
501750	TRUE	1	3.41753	0.292609
392750	TRUE	2	3.41753	0.585218
270250	TRUE	1	3.41753	0.292609
261250	TRUE	1	3.41753	0.292609
240250	FALSE	1	1.5614	0.640449
213750	TRUE	1	3.41753	0.292609
-213250	TRUE	1	3.41753	0.292609
107250	TRUE	1	3.41753	0.292609
175250	TRUE	2	3.41753	0.585218
386750	TRUE	1	3.41753	0.292609
395250	FALSE	1	1.5614	0.640449
-557250	TRUE	1	3.41753	0.292609
-725750	TRUE	1	3.41753	0.292609
-725750	FALSE	1	1.5614	0.640449
-885750	FALSE	2	1.5614	1.2809
723750	TRUE	1	3.41753	0.292609
555250	TRUE	1	3.41753	0.292609
555250	FALSE	1	1.5614	0.640449
250750	TRUE	1	3.41753	0.292609
-160250	FALSE	1	1.5614	0.640449
-4750	FALSE	4	1.5614	2.5618
-24250	TRUE	1	3.41753	0.292609
91250	TRUE	2	3.41753	0.585218
-218250	TRUE	1	3.41753	0.292609
252250	TRUE	1	3.41753	0.292609
275250	TRUE	1	3.41753	0.292609
301250	TRUE	1	3.41753	0.292609
311750	TRUE	2	3.41753	0.585218
326250	TRUE	1	3.41753	0.292609
410250	FALSE	2	1.5614	1.2809
-412250	TRUE	1	3.41753	0.292609
468250	TRUE	1	3.41753	0.292609
-490250	TRUE	3	3.41753	0.877827
-500250	TRUE	2	3.41753	0.585218
-514250	TRUE	1	3.41753	0.292609
538750	TRUE	1	3.41753	0.292609
558250	TRUE	1	3.41753	0.292609
-579250	TRUE	1	3.41753	0.292609
601750	TRUE	1	3.41753	0.292609
621250	FALSE	1	1.5614	0.640449
-690750	TRUE	1	3.41753	0.292609
-780250	TRUE	1	3.41753	0.292609
787250	TRUE	1	3.41753	0.292609
791250	FALSE	9	1.5614	5.76404
791250	TRUE	2	3.41753	0.585218
792250	FALSE	1	1.5614	0.640449
792250	TRUE	1	3.41753	0.292609
819250	FALSE	4	1.5614	2.5618
819250	TRUE	5	3.41753	1.46304
820250	TRUE	7	3.41753	2.04826
820250	FALSE	1	1.5614	0.640449
821250	TRUE	1	3.41753	0.292609
822250	TRUE	1	3.41753	0.292609
853250	TRUE	1	3.41753	0.292609
854250	FALSE	1	1.5614	0.640449
856250	TRUE	1	3.41753	0.292609
-906250	FALSE	1	1.5614	0.640449
-925250	TRUE	1	3.41753	0.292609
928750	TRUE	2	3.41753	0.585218
-951250	FALSE	1	1.5614	0.640449
971250	TRUE	1	3.41753	0.292609
-986250	FALSE	2	1.5614	1.2809
-990250	TRUE	2	3.41753	0.585218
-993750	TRUE	2	3.41753	0.585218
-989750	FALSE	9	1.5614	5.76404
-989750	TRUE	2	3.41753	0.585218
-988750	FALSE	1	1.5614	0.640449
-988750	TRUE	1	3.41753	0.292609
-962750	FALSE	1	1.5614	0.640449
-961750	FALSE	4	1.5614	2.5618
-961750	TRUE	5	3.41753	1.46304
-960750	TRUE	7	3.41753	2.04826
-960750	FALSE	2	1.5614	1.2809
-959750	TRUE	1	3.41753	0.292609
-958750	TRUE	1	3.41753	0.292609
-927750	TRUE	1	3.41753	0.292609
-926750	FALSE	3	1.5614	1.92135
-924750	TRUE	1	3.41753	0.292609
874750	FALSE	2	1.5614	1.2809
-858750	FALSE	1	1.5614	0.640449
855750	TRUE	2	3.41753	0.585218
829750	FALSE	1	1.5614	0.640449
-809750	TRUE	1	3.41753	0.292609
794750	FALSE	2	1.5614	1.2809
790750	TRUE	2	3.41753	0.585218
742750	TRUE	1	3.41753	0.292609
-708750	TRUE	2	3.41753	0.585218
679750	TRUE	2	3.41753	0.585218
679750	FALSE	2	1.5614	1.2809
-644750	TRUE	2	3.41753	0.585218
-644750	FALSE	1	1.5614	0.640449
643750	TRUE	2	3.41753	0.585218
626250	TRUE	2	3.41753	0.585218
625750	FALSE	2	1.5614	1.2809
609750	TRUE	1	3.41753	0.292609
609250	FALSE	1	1.5614	0.640449
-607750	TRUE	1	3.41753	0.292609
-606750	FALSE	1	1.5614	0.640449
605750	TRUE	11	3.41753	3.2187
605750	FALSE	1	1.5614	0.640449
600750	FALSE	1	1.5614	0.640449
510250	FALSE	1	1.5614	0.640449
-286750	FALSE	1	1.5614	0.640449
-282750	FALSE	1	1.5614	0.640449
269250	FALSE	1	1.5614	0.640449
268750	FALSE	1	1.5614	0.640449
258250	TRUE	1	3.41753	0.292609
253250	TRUE	1	3.41753	0.292609
-252750	TRUE	2	3.41753	0.585218
-252250	FALSE	2	1.5614	1.2809
-251750	TRUE	2	3.41753	0.585218
-251750	FALSE	2	1.5614	1.2809
251250	TRUE	1	3.41753	0.292609
249750	FALSE	2	1.5614	1.2809
-246750	FALSE	2	1.5614	1.2809
-229750	TRUE	1	3.41753	0.292609
214750	TRUE	1	3.41753	0.292609
-145750	FALSE	1	1.5614	0.640449
-116750	TRUE	12	3.41753	3.51131
-116750	FALSE	2	1.5614	1.2809
-100750	TRUE	2	3.41753	0.585218
94750	FALSE	2	1.5614	1.2809
-55250	FALSE	1	1.5614	0.640449
-121250	TRUE	2	3.41753	0.585218
126250	TRUE	1	3.41753	0.292609
133250	FALSE	1	1.5614	0.640449
-198250	FALSE	1	1.5614	0.640449
252250	FALSE	2	1.5614	1.2809
261750	FALSE	1	1.5614	0.640449
264750	FALSE	1	1.5614	0.640449
268250	FALSE	1	1.5614	0.640449
-280750	FALSE	1	1.5614	0.640449
-291250	FALSE	1	1.5614	0.640449
-295750	FALSE	1	1.5614	0.640449
-314250	TRUE	1	3.41753	0.292609
-350250	FALSE	1	1.5614	0.640449
-363250	TRUE	1	3.41753	0.292609
327750	FALSE	1	1.5614	0.640449
-314250	FALSE	1	1.5614	0.640449
-255750	FALSE	1	1.5614	0.640449
142250	TRUE	1	3.41753	0.292609
-107750	TRUE	2	3.41753	0.585218
12250	TRUE	5	3.41753	1.46304
31250	TRUE	2	3.41753	0.585218
164750	FALSE	1	1.5614	0.640449
-167250	TRUE	1	3.41753	0.292609
-190250	TRUE	2	3.41753	0.585218
-191750	FALSE	1	1.5614	0.640449
198250	TRUE	1	3.41753	0.292609
-251250	TRUE	3	3.41753	0.877827
258750	TRUE	1	3.41753	0.292609
-260250	TRUE	3	3.41753	0.877827
267250	FALSE	3	1.5614	1.92135
-267250	TRUE	8	3.41753	2.34087
-267250	FALSE	3	1.5614	1.92135
-268750	TRUE	2	3.41753	0.585218
269250	TRUE	1	3.41753	0.292609
-270750	TRUE	2	3.41753	0.585218
-272750	TRUE	5	3.41753	1.46304
-272750	FALSE	2	1.5614	1.2809
273250	TRUE	2	3.41753	0.585218
-275250	TRUE	3	3.41753	0.877827
-275750	TRUE	1	3.41753	0.292609
280250	TRUE	1	3.41753	0.292609
-342750	FALSE	2	1.5614	1.2809
-343750	FALSE	1	1.5614	0.640449
344250	FALSE	2	1.5614	1.2809
344250	TRUE	1	3.41753	0.292609
-348250	TRUE	1	3.41753	0.292609
-356250	FALSE	1	1.5614	0.640449
359250	TRUE	1	3.41753	0.292609
365250	TRUE	1	3.41753	0.292609
-365750	FALSE	1	1.5614	0.640449
-380750	TRUE	2	3.41753	0.585218
383250	FALSE	1	1.5614	0.640449
385250	FALSE	1	1.5614	0.640449
-385750	FALSE	1	1.5614	0.640449
-387250	FALSE	2	1.5614	1.2809
387750	TRUE	1	3.41753	0.292609
390250	FALSE	2	1.5614	1.2809
390750	FALSE	1	1.5614	0.640449
-391250	FALSE	1	1.5614	0.640449
393750	TRUE	1	3.41753	0.292609
-393750	TRUE	1	3.41753	0.292609
-393750	FALSE	1	1.5614	0.640449
394250	FALSE	1	1.5614	0.640449
-394250	FALSE	1	1.5614	0.640449
-395250	FALSE	1	1.5614	0.640449
-396250	FALSE	1	1.5614	0.640449
397750	FALSE	1	1.5614	0.640449
-397750	TRUE	1	3.41753	0.292609
-398750	FALSE	2	1.5614	1.2809
399250	FALSE	1	1.5614	0.640449
-399250	TRUE	1	3.41753	0.292609
-400250	TRUE	1	3.41753	0.292609
595750	FALSE	1	1.5614	0.640449
-582250	FALSE	1	1.5614	0.640449
-523750	FALSE	1	1.5614	0.640449
-375750	TRUE	1	3.41753	0.292609
-330750	FALSE	1	1.5614	0.640449
312250	FALSE	1	1.5614	0.640449
-311250	FALSE	1	1.5614	0.640449
-298250	FALSE	1	1.5614	0.640449
267750	TRUE	4	3.41753	1.17044
-267750	FALSE	1	1.5614	0.640449
-267750	TRUE	1	3.41753	0.292609
267750	FALSE	1	1.5614	0.640449
-266750	TRUE	1	3.41753	0.292609
-266750	FALSE	1	1.5614	0.640449
-265750	TRUE	3	3.41753	0.877827
-255750	TRUE	1	3.41753	0.292609
-242750	TRUE	1	3.41753	0.292609
-228750	TRUE	2	3.41753	0.585218
163250	TRUE	2	3.41753	0.585218
-103250	FALSE	1	1.5614	0.640449
76250	FALSE	3	1.5614	1.92135
-69750	TRUE	2	3.41753	0.585218
17750	FALSE	1	1.5614	0.640449
16750	TRUE	5	3.41753	1.46304
15250	TRUE	1	3.41753	0.292609
5250	TRUE	5	3.41753	1.46304
-74750	FALSE	1	1.5614	0.640449
76250	TRUE	1	3.41753	0.292609
-80250	TRUE	1	3.41753	0.292609
-88250	FALSE	1	1.5614	0.640449
-97750	FALSE	1	1.5614	0.640449
-112750	TRUE	1	3.41753	0.292609
117250	FALSE	1	1.5614	0.640449
-117750	FALSE	1	1.5614	0.640449
119750	TRUE	1	3.41753	0.292609
122250	FALSE	1	1.5614	0.640449
122750	FALSE	1	1.5614	0.640449
125750	TRUE	1	3.41753	0.292609
-125750	FALSE	1	1.5614	0.640449
126250	FALSE	1	1.5614	0.640449
-126250	FALSE	1	1.5614	0.640449
-126750	FALSE	1	1.5614	0.640449
-127250	FALSE	1	1.5614	0.640449
-128250	FALSE	1	1.5614	0.640449
129750	FALSE	1	1.5614	0.640449
-129750	TRUE	2	3.41753	0.585218
-130750	FALSE	1	1.5614	0.640449
131250	FALSE	1	1.5614	0.640449
-131250	TRUE	3	3.41753	0.877827
-132250	TRUE	1	3.41753	0.292609
-10250	TRUE	3	3.41753	0.877827
83750	TRUE	2	3.41753	0.585218
94250	TRUE	1	3.41753	0.292609
-101250	TRUE	1	3.41753	0.292609
130250	TRUE	2	3.41753	0.585218
-135750	TRUE	2	3.41753	0.585218
-162250	TRUE	1	3.41753	0.292609
164250	TRUE	1	3.41753	0.292609
-164250	TRUE	1	3.41753	0.292609
299750	FALSE	1	1.5614	0.640449
345750	TRUE	2	3.41753	0.585218
349250	FALSE	1	1.5614	0.640449
-385250	TRUE	1	3.41753	0.292609
-420250	FALSE	1	1.5614	0.640449
-487250	TRUE	1	3.41753	0.292609
503250	TRUE	1	3.41753	0.292609
-527750	TRUE	1	3.41753	0.292609
-536750	TRUE	1	3.41753	0.292609
-541250	FALSE	1	1.5614	0.640449
-586250	FALSE	1	1.5614	0.640449
770750	TRUE	1	3.41753	0.292609
783250	FALSE	1	1.5614	0.640449
-824250	TRUE	1	3.41753	0.292609
841750	TRUE	1	3.41753	0.292609
867250	TRUE	3	3.41753	0.877827
-867250	TRUE	2	3.41753	0.585218
989250	FALSE	1	1.5614	0.640449
951750	FALSE	1	1.5614	0.640449
934750	TRUE	1	3.41753	0.292609
900750	TRUE	1	3.41753	0.292609
-892250	FALSE	1	1.5614	0.640449
852750	TRUE	1	3.41753	0.292609
-837750	TRUE	1	3.41753	0.292609
824750	FALSE	1	1.5614	0.640449
-723750	FALSE	1	1.5614	0.640449
695250	TRUE	1	3.41753	0.292609
-656250	FALSE	1	1.5614	0.640449
644750	FALSE	1	1.5614	0.640449
604250	TRUE	1	3.41753	0.292609
-585750	TRUE	1	3.41753	0.292609
585750	TRUE	1	3.41753	0.292609
-576250	TRUE	1	3.41753	0.292609
575750	TRUE	1	3.41753	0.292609
574750	TRUE	1	3.41753	0.292609
570750	TRUE	1	3.41753	0.292609
536750	FALSE	1	1.5614	0.640449
-535750	TRUE	5	3.41753	1.46304
-535750	FALSE	1	1.5614	0.640449
535750	TRUE	1	3.41753	0.292609
-512750	FALSE	1	1.5614	0.640449
441250	TRUE	1	3.41753	0.292609
425750	TRUE	1	3.41753	0.292609
414750	TRUE	1	3.41753	0.292609
328750	FALSE	1	1.5614	0.640449
325750	TRUE	1	3.41753	0.292609
322750	TRUE	1	3.41753	0.292609
286750	TRUE	2	3.41753	0.585218
281250	TRUE	1	3.41753	0.292609
223250	TRUE	2	3.41753	0.585218
-155750	TRUE	1	3.41753	0.292609
147250	TRUE	1	3.41753	0.292609
130750	TRUE	1	3.41753	0.292609
126750	TRUE	1	3.41753	0.292609
118750	TRUE	1	3.41753	0.292609
-113250	TRUE	1	3.41753	0.292609
80750	TRUE	1	3.41753	0.292609
-77750	TRUE	3	3.41753	0.877827
-35750	TRUE	1	3.41753	0.292609
31750	TRUE	2	3.41753	0.585218
30750	TRUE	5	3.41753	1.46304
27250	TRUE	1	3.41753	0.292609
14250	TRUE	2	3.41753	0.585218
13750	TRUE	4	3.41753	1.17044
12750	FALSE	2	1.5614	1.2809
12750	TRUE	5	3.41753	1.46304
10750	TRUE	3	3.41753	0.877827
10250	FALSE	1	1.5614	0.640449
4750	TRUE	5	3.41753	1.46304
87750	FALSE	1	1.5614	0.640449
68750	TRUE	1	3.41753	0.292609
29250	TRUE	1	3.41753	0.292609
26250	TRUE	1	3.41753	0.292609
18250	TRUE	4	3.41753	1.17044
-4250	FALSE	4	1.5614	2.5618
-2250	FALSE	4	1.5614	2.5618
-9750	FALSE	1	1.5614	0.640449
-10750	FALSE	1	1.5614	0.640449
-12750	FALSE	1	1.5614	0.640449
-18250	TRUE	27	3.41753	7.90044
-18750	TRUE	2	3.41753	0.585218
-69750	FALSE	1	1.5614	0.640449
-95750	FALSE	1	1.5614	0.640449
96250	FALSE	1	1.5614	0.640449
-98250	FALSE	1	1.5614	0.640449
-113750	FALSE	1	1.5614	0.640449
-295750	TRUE	1	3.41753	0.292609
-296250	TRUE	6	3.41753	1.75565
-298250	TRUE	3	3.41753	0.877827
-298750	TRUE	1	3.41753	0.292609
-299250	TRUE	6	3.41753	1.75565
299250	TRUE	1	3.41753	0.292609
-300750	TRUE	1	3.41753	0.292609
-301750	TRUE	1	3.41753	0.292609
302250	FALSE	1	1.5614	0.640449
-302250	TRUE	2	3.41753	0.585218
304250	TRUE	1	3.41753	0.292609
-304750	TRUE	2	3.41753	0.585218
-317750	FALSE	1	1.5614	0.640449
320250	TRUE	1	3.41753	0.292609
-321750	TRUE	2	3.41753	0.585218
321750	FALSE	1	1.5614	0.640449
-322250	TRUE	1	3.41753	0.292609
323250	TRUE	1	3.41753	0.292609
-324250	TRUE	1	3.41753	0.292609
325250	TRUE	1	3.41753	0.292609
325250	FALSE	1	1.5614	0.640449
-325250	FALSE	1	1.5614	0.640449
326250	FALSE	1	1.5614	0.640449
-326250	TRUE	3	3.41753	0.877827
-335250	TRUE	2	3.41753	0.585218
-348750	TRUE	2	3.41753	0.585218
364750	TRUE	2	3.41753	0.585218
367250	TRUE	1	3.41753	0.292609
-370750	FALSE	1	1.5614	0.640449
-373750	FALSE	1	1.5614	0.640449
-409250	TRUE	1	3.41753	0.292609
423750	FALSE	1	1.5614	0.640449
436750	FALSE	1	1.5614	0.640449
-443250	FALSE	1	1.5614	0.640449
495250	TRUE	2	3.41753	0.585218
-517750	TRUE	1	3.41753	0.292609
527250	TRUE	2	3.41753	0.585218
-527250	TRUE	5	3.41753	1.46304
537250	TRUE	1	3.41753	0.292609
539250	FALSE	1	1.5614	0.640449
550250	FALSE	1	1.5614	0.640449
-560250	TRUE	1	3.41753	0.292609
563250	TRUE	1	3.41753	0.292609
598250	TRUE	1	3.41753	0.292609
609250	TRUE	1	3.41753	0.292609
-622250	FALSE	1	1.5614	0.640449
626250	FALSE	1	1.5614	0.640449
-638750	TRUE	1	3.41753	0.292609
714250	FALSE	1	1.5614	0.640449
723750	FALSE	1	1.5614	0.640449
743250	FALSE	1	1.5614	0.640449
-749250	TRUE	1	3.41753	0.292609
-752750	FALSE	2	1.5614	1.2809
-768250	FALSE	2	1.5614	1.2809
-799750	FALSE	1	1.5614	0.640449
805250	FALSE	1	1.5614	0.640449
817250	FALSE	2	1.5614	1.2809
-821750	FALSE	1	1.5614	0.640449
826250	FALSE	1	1.5614	0.640449
-839250	FALSE	1	1.5614	0.640449
868750	TRUE	2	3.41753	0.585218
-880750	TRUE	2	3.41753	0.585218
885250	TRUE	1	3.41753	0.292609
890250	TRUE	1	3.41753	0.292609
910250	TRUE	2	3.41753	0.585218
938250	TRUE	1	3.41753	0.292609
-954250	TRUE	1	3.41753	0.292609
958750	TRUE	1	3.41753	0.292609
-969250	FALSE	1	1.5614	0.640449
974750	TRUE	1	3.41753	0.292609
979250	TRUE	1	3.41753	0.292609
992250	TRUE	1	3.41753	0.292609
996250	TRUE	1	3.41753	0.292609
61250	FALSE	2	1.5614	1.2809
121250	TRUE	1	3.41753	0.292609
-133750	FALSE	1	1.5614	0.640449
215250	FALSE	1	1.5614	0.640449
248250	TRUE	1	3.41753	0.292609
248750	TRUE	1	3.41753	0.292609
251750	TRUE	1	3.41753	0.292609
-277250	TRUE	1	3.41753	0.292609
353250	FALSE	1	1.5614	0.640449
-487250	FALSE	1	1.5614	0.640449
606250	FALSE	1	1.5614	0.640449
630750	FALSE	1	1.5614	0.640449
633250	TRUE	1	3.41753	0.292609
643250	TRUE	1	3.41753	0.292609
646250	FALSE	2	1.5614	1.2809
646250	TRUE	2	3.41753	0.585218
-666250	FALSE	2	1.5614	1.2809
-670750	FALSE	1	1.5614	0.640449
-672250	FALSE	1	1.5614	0.640449
-676750	TRUE	1	3.41753	0.292609
-685750	TRUE	1	3.41753	0.292609
-694750	FALSE	1	1.5614	0.640449
763750	TRUE	1	3.41753	0.292609
-781250	TRUE	1	3.41753	0.292609
-782250	TRUE	1	3.41753	0.292609
787750	TRUE	1	3.41753	0.292609
844250	TRUE	1	3.41753	0.292609
-881250	TRUE	1	3.41753	0.292609
-895250	TRUE	1	3.41753	0.292609
967250	TRUE	1	3.41753	0.292609
-987250	TRUE	1	3.41753	0.292609
978750	FALSE	1	1.5614	0.640449
934250	TRUE	1	3.41753	0.292609
-924750	FALSE	1	1.5614	0.640449
905250	FALSE	1	1.5614	0.640449
-902750	TRUE	1	3.41753	0.292609
862750	TRUE	1	3.41753	0.292609
858250	FALSE	1	1.5614	0.640449
-856750	TRUE	1	3.41753	0.292609
-819750	TRUE	1	3.41753	0.292609
772750	TRUE	2	3.41753	0.585218
756750	TRUE	1	3.41753	0.292609
648750	FALSE	1	1.5614	0.640449
-625750	TRUE	1	3.41753	0.292609
606750	TRUE	1	3.41753	0.292609
581750	FALSE	2	1.5614	1.2809
552750	TRUE	1	3.41753	0.292609
547750	TRUE	1	3.41753	0.292609
509750	FALSE	1	1.5614	0.640449
-506750	TRUE	1	3.41753	0.292609
490750	TRUE	1	3.41753	0.292609
-487750	TRUE	1	3.41753	0.292609
-478750	TRUE	1	3.41753	0.292609
475750	FALSE	1	1.5614	0.640449
-451750	FALSE	2	1.5614	1.2809
445250	FALSE	1	1.5614	0.640449
-444750	FALSE	1	1.5614	0.640449
439250	TRUE	1	3.41753	0.292609
-436750	TRUE	1	3.41753	0.292609
406750	TRUE	2	3.41753	0.585218
404750	FALSE	1	1.5614	0.640449
380750	FALSE	1	1.5614	0.640449
332750	TRUE	1	3.41753	0.292609
-331750	TRUE	1	3.41753	0.292609
311250	FALSE	1	1.5614	0.640449
-293750	TRUE	1	3.41753	0.292609
-292250	TRUE	1	3.41753	0.292609
254750	TRUE	2	3.41753	0.585218
242750	TRUE	2	3.41753	0.585218
224750	FALSE	1	1.5614	0.640449
200250	TRUE	1	3.41753	0.292609
-192750	TRUE	1	3.41753	0.292609
-178750	TRUE	1	3.41753	0.292609
-167750	FALSE	1	1.5614	0.640449
-152750	TRUE	1	3.41753	0.292609
150750	TRUE	1	3.41753	0.292609
-149750	FALSE	1	1.5614	0.640449
-148750	FALSE	1	1.5614	0.640449
145750	TRUE	1	3.41753	0.292609
-144750	TRUE	2	3.41753	0.585218
-143750	TRUE	3	3.41753	0.877827
-142750	FALSE	1	1.5614	0.640449
-142750	TRUE	2	3.41753	0.585218
141250	TRUE	1	3.41753	0.292609
-140250	TRUE	1	3.41753	0.292609
-138750	TRUE	3	3.41753	0.877827
138750	TRUE	2	3.41753	0.585218
-136750	TRUE	2	3.41753	0.585218
135750	TRUE	4	3.41753	1.17044
-135250	TRUE	1	3.41753	0.292609
134750	TRUE	1	3.41753	0.292609
-110750	FALSE	2	1.5614	1.2809
102250	TRUE	1	3.41753	0.292609
89250	TRUE	2	3.41753	0.585218
83750	FALSE	2	1.5614	1.2809
-83750	FALSE	1	1.5614	0.640449
64750	TRUE	4	3.41753	1.17044
26750	TRUE	4	3.41753	1.17044
1750	FALSE	6	1.5614	3.8427
-15750	TRUE	1	3.41753	0.292609
-22750	TRUE	3	3.41753	0.877827
24250	TRUE	3	3.41753	0.877827
42750	TRUE	1	3.41753	0.292609
58750	TRUE	1	3.41753	0.292609
174250	TRUE	1	3.41753	0.292609
-180750	TRUE	1	3.41753	0.292609
279250	TRUE	1	3.41753	0.292609
-333250	FALSE	1	1.5614	0.640449
-339750	FALSE	1	1.5614	0.640449
352750	FALSE	1	1.5614	0.640449
-374250	TRUE	1	3.41753	0.292609
413750	FALSE	1	1.5614	0.640449
-545250	TRUE	1	3.41753	0.292609
552250	TRUE	1	3.41753	0.292609
-557250	FALSE	2	1.5614	1.2809
574250	FALSE	1	1.5614	0.640449
-689250	TRUE	1	3.41753	0.292609
697250	FALSE	1	1.5614	0.640449
697250	TRUE	1	3.41753	0.292609
737250	TRUE	1	3.41753	0.292609
-745250	TRUE	1	3.41753	0.292609
793250	TRUE	2	3.41753	0.585218
833250	TRUE	1	3.41753	0.292609
-868250	TRUE	1	3.41753	0.292609
-905250	TRUE	1	3.41753	0.292609
-950750	TRUE	1	3.41753	0.292609
-965250	FALSE	1	1.5614	0.640449
989750	TRUE	1	3.41753	0.292609
940750	TRUE	1	3.41753	0.292609
-934750	TRUE	2	3.41753	0.585218
796750	TRUE	2	3.41753	0.585218
[truncated: 820 more rows]

## Sheet: 5D
sample	count	unmappable	unmappable.frac	njuncs	tumor_type_final	tumor_type_level
0128	5	4	0.363636	6	GBM	GBM
0145	15	5	0.049505	86	GBM	GBM
0155			0	46	GBM	GBM
0185	6	6	0.0882353	62	GBM	GBM
0208	23	17	0.171717	76	GBM	GBM
0210	4	1	0.0060241	162	GBM	GBM
0211	20	13	0.077381	148	GBM	GBM
0214	39	21	0.0658307	280	GBM	GBM
04616fe602821be83f79e051c94c28347907f72d4e9ed5d7f1f50d4cfcd71d01	33	21	0.107692	162	ESAD	ESAD
04f3767cc1c78f1c22b06d659d308741a588e272ee723b39f744913ad669cd6e	5	2	0.0266667	70	ESAD	ESAD
05fb093d1b2af292cf0795316e9afefc4407f42256c914edeee9ac881e1d435c	14	7	0.166667	28	ESAD	ESAD
0648	37	15	0.107914	102	GBM	GBM
0723	98	76	0.194872	292	OV	OV
0725	26	17	0.0988372	146	OV	OV
0727	24	14	0.0679612	182	OV	OV
0744	14	6	0.0319149	174	GBM	GBM
0745	12	8	0.0465116	160	GBM	GBM
0751	64	39	0.0919811	360	OV	OV
0877	8	6	0.0731707	74	GBM	GBM
0881			0	2	GBM	GBM
0890	62	44	0.192982	166	OV	OV
0906	26	18	0.054878	302	OV	OV
0912	23	11	0.0552764	176	OV	OV
0934	91	17	0.0550162	218	OV	OV
0937	10	7	0.0178571	382	OV	OV
0938	53	26	0.0529532	438	OV	OV
0980	26	13	0.125	78	OV	OV
0982	63	50	0.209205	176	OV	OV
0985a2e91070b77b0b7c61278b04d7c88864c3bc670f211bdb54bd09d271e986	46	35	0.233333	104	ESAD	ESAD
0a85375cbfa23eb57f9647c13fd4a774922afd325ecca61ecb70f165f9e4a2e7	41	31	0.0840108	328	ESAD	ESAD
0b64dd9e11bfd9b7413d9bc770587b6a011e6946109f1ded24bc92444941450f	17	13	0.351351	20	ESAD	ESAD
0c18dae928d5146c8b0d052a9ceffa02ef1e1dcd70f6e5c321dc37c264d9c9d8	27	14	0.0606061	204	ESAD	ESAD
0de0307feaaebcd92622acc19aae9d7ee9ba2f58ebfbfa0f8523e7c4f1b6b3ed	36	13	0.0613208	176	ESAD	ESAD
0df54561b9dfce1f7cc6d2858f039c4303727558615b8b64364b09c963da19f2	66	33	0.0753425	372	ESAD	ESAD
0f48df24681bff9daca43ea351a061173146b5a347774916fe4c683d65016d10	8	6	0.09375	56	ESAD	ESAD
0f4a8719dbb0caa2e8b638fe74d6c6dac6ca5ee91e4423e421a2f013170a0ca9	62	37	0.0758197	426	ESAD	ESAD
1034	4	2	0.0384615	48	GBM	GBM
1063	22	14	0.1	118	GBM	GBM
1078	1	1	0.2	4	LUSC	LUSC
1082	125	117	0.386139	178	LUSC	LUSC
1083	39	28	0.0746667	336	LUSC	LUSC
1086	2	2	0.166667	10	GBM	GBM
1103	44	39	0.11747	288	OV	OV
1110	30	14	0.0331754	392	OV	OV
1118	43	28	0.0510018	506	OV	OV
1124	80	52	0.0486891	988	OV	OV
11524e868cfd06698eab18840572b21e31ccc772b0a6d8695b31b16d44f17de9	11	7	0.259259	16	ESAD	ESAD
1319	115	77	0.17226	332	OV	OV
1331	25	15	0.059761	226	OV	OV
1347	91	45	0.0935551	390	OV	OV
1349	19	9	0.0604027	130	OV	OV
1367	10	6	0.0309278	184	OV	OV
1371	163	127	0.35376	196	OV	OV
1395dc4ab7c754e0a84c8daa3996f16e5caf11169f8a9be6c800f6da00474321	25	13	0.0653266	174	ESAD	ESAD
1401	32	4	0.125	0	GBM	GBM
1402	37	14	0.0232172	566	GBM	GBM
1419	24	13	0.110169	94	OV	OV
1459	17	13	0.0446735	274	GBM	GBM
1460	12	10	0.384615	14	GBM	GBM
1466	153	83	0.0648944	1126	OV	OV
1487	47	29	0.0458136	586	OV	OV
1491	15	8	0.0410256	180	OV	OV
1514	28	18	0.0825688	190	OV	OV
1542	28	20	0.0694444	260	OV	OV
1544	53	30	0.0854701	298	OV	OV
1548	18	9	0.06	132	OV	OV
1552	46	30	0.0724638	368	OV	OV
1557	70	42	0.0482759	800	OV	OV
1558	81	54	0.123007	358	OV	OV
1562	7	3	0.017341	166	OV	OV
1570	13	9	0.0224439	388	OV	OV
1571	73	39	0.0884354	368	OV	OV
1574	19	12	0.0421053	266	OV	OV
158cfbabcfd84336aa6020a4d6ada78d4cc56ae83802bc9e556d5d8db44af5a0	75	42	0.0422111	920	ESAD	ESAD
1596	116	103	0.585227	60	LUAD	LUAD
160-23716-53M-37--160-24958N-132N-GST	7	5	0.16129	24	BE	BE
1614	26	13	0.0338542	358	OV	OV
1622	37	26	0.0981132	228	LUSC	LUSC
163-23740-14O-37--163-25059N-78R-BLD	35	33	0.141631	198	BE	BE
163-23749-256R-35--163-25059N-78R-BLD	7	7	0.047619	140	BE	BE
163-24735-256R-37--163-25059N-78R-BLD	27	21	0.0909091	204	BE	BE
1632	21	12	0.0273349	418	OV	OV
1634	38	22	0.0718954	268	OV	OV
1666	18	13	0.0235507	534	OV	OV
1678	49	36	0.136882	214	LUAD	LUAD
169-23764-9T-31--169-25060N-253T-BLD	9	6	0.0740741	72	BE	BE
16ecc4c79c9ca8e731e9b0f2c6084c63a222890ad8d448c3658736dbc6eff424	36	24	0.0923077	224	ESAD	ESAD
17-23561-12V-35--17-24987N-105W-BLD	15	15	0.112782	118	BE	BE
170-23794-3B-33--170-25061N-3B-BLD			0	20	BE	BE
1831	6	4	0.0210526	184	GBM	GBM
1970	39	24	0.0418848	534	GBM	GBM
1a7f4e2b2564e194582ecffac318dfbe9d86f05a14aac53a5f2e2cd58840ee08	28	11	0.05	192	ESAD	ESAD
1abf4349b13234e9b9fe664e01960425da9b129ab4b0672a69a7103ff2bbf1b3	44	23	0.069697	286	ESAD	ESAD
2000	60	29	0.0367089	730	OV	OV
2024	8	2	0.00847458	228	OV	OV
2045	15	8	0.0334728	224	OV	OV
2050	15	8	0.0216802	354	OV	OV
206327a320b967baf95361f43e814ab0e7403364077c84c04722fbe9ec7d59d5	137	65	0.0321942	1882	ESAD	ESAD
21c3e02f465c21c25f5d7f686b2a5c008b23a2fe5469d444ebac07f80a1ab962	20	19	0.107955	156	ESAD	ESAD
222-24370-179T-30--222-25062N-179T-BLD	2	2	0.0714286	26	BE	BE
2290	30	18	0.0432692	386	OV	OV
2368c29b6b700ca640ec887666c149533231d23ea32718f6f83469b5b7ad7aa4	41	29	0.0812325	316	ESAD	ESAD
2391	8	3	0.00955414	306	OV	OV
23b4e52e36a71bfaec31dc2edd3dd8e6e470acab656279f96446223d654bcc2c	2	0	0	8	ESAD	ESAD
2400	156	94	0.153094	458	OV	OV
2485	337	328	0.693446	136	GBM	GBM
2523	13	8	0.0361991	208	GBM	GBM
2554	12	8	0.0493827	150	GBM	GBM
2567f5779f07b4c5c7eb5ef5590da72b4352f0e6353150b2f090c354721bebac.2	38	15	0.039267	344	ESAD	ESAD
2570	11	9	0.0434783	196	GBM	GBM
25e28ea260c8efc00de88a0e7da3faaea440f68bd539d0fd84e7ae65e33969e9	49	23	0.0488323	422	ESAD	ESAD
2600	24	12	0.130435	68	LUSC	LUSC
2613d0db5e6407392aa2691ce6db2a4cd350b8258a38f9f6b83844d3b8272685	17	7	0.0463576	134	ESAD	ESAD
2624	15	7	0.0116473	586	GBM	GBM
2629	37	33	0.362637	54	GBM	GBM
266-24139-216R-35--266-25063N-67T-BLD	19	19	0.463415	22	BE	BE
266-24145-67T-34--266-25063N-67T-BLD	65	46	0.118863	322	BE	BE
2666	5	4	0.8	0	LUAD	LUAD
2668	10	7	0.4375	6	LUAD	LUAD
2677	10	6	0.0247934	232	COAD	COAD
2680	4	3	0.214286	10	COAD	COAD
2681	28	9	0.0357143	224	COAD	COAD
2683	30	16	0.0909091	146	COAD	COAD
2684	3	2	0.105263	16	COAD	COAD
2689	24	13	0.106557	98	COAD	COAD
2695	24	15	0.15625	72	LUSC	LUSC
26f2fa25ea0f6c5911c3bb6e831d1a0633ce4a1b295028b1d09ef01b66cec0e2	72	35	0.0853659	338	ESAD	ESAD
2711	66	47	0.159864	228	LUSC	LUSC
2713	24	20	0.104167	168	LUSC	LUSC
2719	62	50	0.203252	184	LUSC	LUSC
2722	66	55	0.218254	186	LUSC	LUSC
2747cb2bda1947f81a644e04eff504ecc3bdbd1723259420fbabbb33c4d2c8c0	64	44	0.144737	240	ESAD	ESAD
2756	145	89	0.0998878	746	LUSC	LUSC
2757	28	19	0.146154	102	LUSC	LUSC
2759	78	51	0.104938	408	LUSC	LUSC
2766	67	42	0.0450161	866	LUSC	LUSC
2789	32	25	0.0961538	228	LUSC	LUSC
279-24924-251R-32--279-25064N-76R-BLD	17	13	0.0935252	122	BE	BE
2793	79	47	0.0733229	562	LUSC	LUSC
2795	45	31	0.106529	246	LUSC	LUSC
2905	1	1	0.2	4	AML	AML
2906			0	4	AML	AML
2907			0	0	AML	AML
290d0ca5c183044dfb5f98e84bd2ca1cdc2aab53a21f90070e15694bd111fe16	82	65	0.107973	520	ESAD	ESAD
295-24169-103S-32--295-25066N-72T-BLD	16	13	0.0706522	168	BE	BE
295-24175-215U-34--295-25066N-72T-BLD	38	27	0.0912162	258	BE	BE
295-24184-215U-26--295-25066N-72T-BLD	42	33	0.136364	200	BE	BE
2963	1	1	1	0	AML	AML
2964			0	0	AML	AML
2965			0	0	AML	AML
2966	2	0	0	2	AML	AML
2967			0	0	AML	AML
2968			0	2	AML	AML
2969	1	1	1	0	AML	AML
2970			0	0	AML	AML
2971	2	0	0	0	AML	AML
2972			0	0	AML	AML
2973			0	0	AML	AML
2974	1	1	1	0	AML	AML
2975			0	0	AML	AML
2976			0	0	AML	AML
2977			0	0	AML	AML
2978			0	0	AML	AML
2979			0	2	AML	AML
2980			0	4	AML	AML
2981	3	3	1	0	AML	AML
2982			0	0	AML	AML
2983			0	0	AML	AML
2984	1	1	0.333333	2	AML	AML
2985			0	0	AML	AML
2986	2	2	1	0	AML	AML
2987			0	0	AML	AML
2988			0	0	AML	AML
2989	2	2	1	0	AML	AML
2990			0	0	AML	AML
2991			0	4	AML	AML
2992			0	2	AML	AML
2994			0	4	AML	AML
2995			0	0	AML	AML
2996			0	0	AML	AML
2997			0	0	AML	AML
2998	2	2	1	0	AML	AML
2999			0	4	AML	AML
29a625999b8102746891f4265f9aa80f576db0b4c9456ec553ff482d3c40d130	155	49	0.129973	222	ESAD	ESAD
2e9faf28897dce9dfd86c06101eeb7398f945036f13b5f9d78dd02e113ca9ba0	47	29	0.043609	618	ESAD	ESAD
2ebb7adee8dfe2f8b4c0820e9138453f3cf04251686f23b187dc30bbb52c7e96	14	12	0.075	146	ESAD	ESAD
2fb1c6063e7eac401741e82a2ac128bcb29d26f1f7f301a41db9878ab7813f6f	18	10	0.217391	28	ESAD	ESAD
3000	3	3	1	0	AML	AML
3002			0	0	AML	AML
3005	2	2	0.333333	4	AML	AML
3006	2	2	0.5	2	AML	AML
3007	2	2	0.333333	4	AML	AML
3008	2	2	1	0	AML	AML
3009			0	4	AML	AML
3011	1	1	1	0	AML	AML
3012			0	0	AML	AML
303-23602-162L-38--303-24975N-41K-GST	26	24	0.104348	204	BE	BE
303-24660-41K-37--303-24975N-41K-GST	13	8	0.0824742	84	BE	BE
30e5afb25005a5e6be0c0de29595b2f386308b854a73ffb15317c461718205a3	38	20	0.0925926	178	ESAD	ESAD
310c15daca2145583e440e9a6ab0a6052fa4d08b785d6455e961ddce5f4196fe	27	15	0.0738916	176	ESAD	ESAD
3132e2e81d7312f93261cf771e6cc7fdb8e4800ad8d8f4049bc7ec800b08789c	16	13	0.0783133	150	ESAD	ESAD
3180f8e34845d13e27dddd90486dba083cd87a340d919f75d29859766f7faee4	49	27	0.0447761	554	ESAD	ESAD
322-24807-130U-35--322-25067N-130U-BLD	16	15	0.267857	40	BE	BE
3308	10	7	0.184211	28	KIRC	KIRC
3324	2	0	0	8	KIRC	KIRC
3363	17	8	0.057554	122	KIRC	KIRC
3372	2	1	0.25	2	KIRC	KIRC
3387			0	16	KIRC	KIRC
3394	71	49	0.142857	272	LUSC	LUSC
3454	3	1	0.047619	18	KIRC	KIRC
3455	6	6	0.5	6	KIRC	KIRC
3466	37	19	0.077551	208	KIRP	KIRP
3467	3	3	1	0	KIRP	KIRP
3468			0	0	KIRP	KIRP
3472			0	0	KIRP	KIRP
3516	10	6	0.0882353	58	COAD	COAD
3518	14	7	0.0921053	62	COAD	COAD
3574	35	35	0.686275	16	COAD	COAD
3582	137	129	0.568282	90	COAD	COAD
3593	20	13	0.122642	86	COAD	COAD
3664	20	11	0.0611111	160	COAD	COAD
3666	41	29	0.163842	136	COAD	COAD
3709a5a3c78b4c21fbcb1c6a15585b054c7d38d78a1eaa3ee4e307b79c11a245	51	36	0.0897756	350	ESAD	ESAD
3727	3	2	0.028169	68	COAD	COAD
37b56a8f3ae8e0f59bb17651a17a967c62f68204140b18b7d013c9eb709c69d2	27	19	0.0829694	202	ESAD	ESAD
3809			0	12	COAD	COAD
3810	31	25	0.229358	78	COAD	COAD
3885	160	152	0.77551	36	COAD	COAD
3890	15	10	0.0740741	120	COAD	COAD
3896	11	6	0.0779221	66	COAD	COAD
391-23521-155R-31--391-25007N-73P-BLD	25	23	0.132948	148	BE	BE
391-23866-82K-33--391-25007N-73P-BLD	13	8	0.0963855	70	BE	BE
3913	24	12	0.0952381	102	COAD	COAD
3917	53	40	0.205128	142	LUAD	LUAD
3920	121	93	0.252033	248	LUSC	LUSC
392af0c06be23bfc8f60361072a92268662bbd2b0d739201b5c2fbd34a15ff25	38	25	0.0976562	218	ESAD	ESAD
3956	8	5	0.078125	56	COAD	COAD
396-24457-98A-37--396-25008N-52V-BLD	76	58	0.1	504	BE	BE
3994	16	9	0.125	56	COAD	COAD
3abbfc149ac774b3bfed61438c5b709a473c0c6162b6707b4bfebef67eba2260	30	11	0.0611111	150	ESAD	ESAD
3abbfc149ac774b3bfed61438c5b709a473c0c6162b6707b4bfebef67eba2260.2	32	13	0.0670103	162	ESAD	ESAD
3b5faf7fabba6b596f14ce281d06ce54af4d06027722cfd3114b8f0dd0ab5ae5	121	62	0.0832215	624	ESAD	ESAD
3d6f94f343bc3a4030461f304e31d6aea165b3bb39f965d71697c7db8c1cee47	59	26	0.0185582	1342	ESAD	ESAD
3ecd9b003fa28a4fde294f8a7b8f0f260fcf21f80d9ca1cf4e6312caab88c6a7	51	27	0.0606742	394	ESAD	ESAD
3f033a2314ecd6d19bd09179af1fd688ee38da8a63ea2b0879ec99d86e7460d6	10	5	0.0520833	86	ESAD	ESAD
3f09772b941e0dc3721126176238df54197fca741e9c633c0860bc68791c6e7a	39	25	0.105485	198	ESAD	ESAD
3ff03763c8288dca4d2513ab1f9ce95572eef640989b55b7ed10a722484ac238	52	22	0.0539216	356	ESAD	ESAD
4007	15	3	0.0157068	176	COAD	COAD
4015	59	35	0.102639	282	COAD	COAD
4076	44	29	0.100694	244	HNSC	HNSC
4077	18	13	0.106557	104	HNSC	HNSC
4102009	21	17	0.377778	24	MALY	MALY
4103141	4	4	1	0	MALY	MALY
4104893	18	13	0.325	22	MALY	MALY
4105105	4	4	0.4	6	MALY	MALY
4105746	7	5	0.0943396	46	MALY	MALY
4108101	64	54	0.5625	32	MALY	MALY
4108992	6	3	0.00731707	404	MALY	MALY
4111326	9	6	0.101695	50	MALY	MALY
4111337	80	55	0.170807	242	MALY	MALY
4112447	4	4	0.4	6	MALY	MALY
4112512	3	2	0.133333	12	MALY	MALY
4113191	2	2	0.111111	16	MALY	MALY
4113825	3	3	0.428571	4	MALY	MALY
4114	2	1	0.125	6	KIRP	KIRP
4115			0	2	KIRP	KIRP
4116	10	4	0.0285714	130	KIRP	KIRP
4117	7	4	0.307692	6	KIRP	KIRP
4119027	6	6	1	0	MALY	MALY
4119279	50	39	0.263514	98	MALY	MALY
4120157	5	3	0.0526316	52	MALY	MALY
4121361	11	9	0.6	4	MALY	MALY
4124188	4	4	0.25	12	MALY	MALY
4124542	5	2	0.285714	2	MALY	MALY
4125240	9	3	0.272727	2	MALY	MALY
4127766	2	2	0.2	8	MALY	MALY
4130003	12	12	0.666667	6	MALY	MALY
4131095	3	3	0.272727	8	MALY	MALY
4131257	19	13	0.139785	74	MALY	MALY
4133263	28	17	0.144068	90	MALY	MALY
4133511	9	4	0.0701754	48	MALY	MALY
4134005	7	3	0.0967742	24	MALY	MALY
4134434	22	12	0.0789474	130	MALY	MALY
4135	100	53	0.0610599	768	LUSC	LUSC
4135099	48	23	0.0506608	406	MALY	MALY
4135350	61	57	0.612903	32	MALY	MALY
4136702	7	5	0.128205	32	MALY	MALY
4138527	15	13	0.0472727	260	MALY	MALY
4138885	5	3	0.6	0	MALY	MALY
4139696	41	35	0.777778	4	MALY	MALY
4142267	8	8	0.5	8	MALY	MALY
4142605	5	5	0.0909091	50	MALY	MALY
4144633	8	6	0.6	2	MALY	MALY
4144951	8	5	0.0373134	126	MALY	MALY
4145056	6	5	0.25	14	MALY	MALY
4145177	10	6	0.0967742	52	MALY	MALY
4145528	217	112	0.0581214	1710	MALY	MALY
4146289	6	4	0.181818	16	MALY	MALY
4147081	30	20	0.104167	162	MALY	MALY
4147968	31	20	0.0865801	200	MALY	MALY
4149246	6	1	0.1	4	MALY	MALY
4157186	5	4	0.0727273	50	MALY	MALY
4159170	4	4	0.25	12	MALY	MALY
4160100	12	5	0.0595238	72	MALY	MALY
4160468	5	2	0.153846	8	MALY	MALY
4163639	15	11	0.0493274	208	MALY	MALY
4165379	5	5	1	0	MALY	MALY
4166151	6	6	0.1875	26	MALY	MALY
4166503	2	2	0.142857	12	MALY	MALY
4166706	15	10	0.285714	20	MALY	MALY
4170686	3	3	0.333333	6	MALY	MALY
4172511	2	1	0.25	2	MALY	MALY
4174905	4	2	0.2	6	MALY	MALY
4175837	10	9	0.236842	28	MALY	MALY
4176133	37	30	0.447761	30	MALY	MALY
4177434	19	14	0.297872	28	MALY	MALY
4177601	5	4	0.8	0	MALY	MALY
4177810	6	6	0.375	10	MALY	MALY
4177856	11	10	0.666667	4	MALY	MALY
4177987	4	4	0.4	6	MALY	MALY
4178310	4	4	0.25	12	MALY	MALY
4178345	12	11	0.916667	0	MALY	MALY
4178655	9	7	0.137255	42	MALY	MALY
4182393	10	9	0.375	14	MALY	MALY
4184094	6	3	0.1875	10	MALY	MALY
4188398	34	14	0.0795455	142	MALY	MALY
4189035	18	14	0.225806	44	MALY	MALY
4189200	3	3	0.272727	8	MALY	MALY
4189998	7	6	0.461538	6	MALY	MALY
4190495	19	16	0.516129	12	MALY	MALY
4190784	5	4	0.266667	10	MALY	MALY
4193278	11	8	0.421053	8	MALY	MALY
4193638	15	4	0.056338	56	MALY	MALY
4194218	3	2	0.181818	8	MALY	MALY
4194891	3	2	0.285714	4	MALY	MALY
4196670	3	0	0	36	MALY	MALY
4198542	5	5	0.384615	8	MALY	MALY
4199714	31	29	0.54717	22	MALY	MALY
41db2179d8691b0d49e9bc19245ac8af93d9c637a498ec7ab822269664452482	39	22	0.0329835	628	ESAD	ESAD
42-24292-53L-36--42-24954N-53L-GST	7	5	0.047619	98	BE	BE
4225	16	13	0.116071	96	HNSC	HNSC
4280	4	3	0.0625	44	STAD	STAD
42a2b2ad86b3d0f66ecec5ce1d8b0cca6e334d365d6434d2bf1050e9b2f97990	23	15	0.0867052	150	ESAD	ESAD
43-23593-29P-28--43-24956N-29P-GST	7	6	0.0689655	80	BE	BE
4326	1	1	0.333333	2	KIRC	KIRC
4327			0	12	KIRC	KIRC
4389	43	36	0.324324	68	LUAD	LUAD
4395	67	56	0.331361	102	LUAD	LUAD
4396	19	12	0.0745342	142	LUAD	LUAD
4397	217	204	0.581197	134	LUAD	LUAD
4442	7	3	0.0909091	26	STAD	STAD
4443	56	36	0.0507042	654	STAD	STAD
445fe324ced35562aa4eb787ace04dc826bbc25ec67b236bba7f226837270672	7	4	0.014652	266	ESAD	ESAD
4474	7	7	0.137255	44	STAD	STAD
4486	47	44	0.444444	52	LUAD	LUAD
450-23914-37P-34--450-25070N-120R-BLD	15	14	0.135922	88	BE	BE
450-23923-120R-29--450-25070N-120R-BLD	36	31	0.158163	160	BE	BE
450-24753-37P-29--450-25070N-120R-BLD	10	8	0.102564	68	BE	BE
4510	50	44	0.5	38	LUAD	LUAD
4630	138	93	0.0570552	1492	LUAD	LUAD
4639			0	10	KIRC	KIRC
4741	18	11	0.161765	50	HNSC	HNSC
4781	6	6	0.176471	28	KIRC	KIRC
483-23830-132U-31--483-24961N-246S-GST	18	16	0.615385	8	BE	BE
4870	12	12	0.545455	10	KIRC	KIRC
4885			0	14	KIRC	KIRC
48bba806613d4dc7b432d75c0069ee314684f6d69e3f52503b52f3150448dc14	105	53	0.0767004	586	ESAD	ESAD
490ae7348c12a59b53192e341610b5c588783c80cbd969631ecf953ad0baf508	38	23	0.0429104	498	ESAD	ESAD
4977	2	2	0.166667	10	KIRC	KIRC
4e8a9e9de13e84cb13e7f68253d35f16e193470fcdb70f686c8bacfd2424356a	73	46	0.117647	318	ESAD	ESAD
5094	6	5	0.15625	26	KIRC	KIRC
50da2d6b3ff31238fea9f4ebb147722fc306715eea709cd1107d229810ce4202	73	43	0.0456961	868	ESAD	ESAD
512-23971-43R-27--512-25072N-306R-BLD	127	117	0.431734	144	BE	BE
512-23977-306R-29--512-25072N-306R-BLD	37	28	0.114286	208	BE	BE
5149	35	24	0.128342	152	HNSC	HNSC
5153	5	5	0.0980392	46	HNSC	HNSC
5240	22	19	0.22619	62	LUSC	LUSC
5249	7	6	0.206897	22	HNSC	HNSC
5260	13	8	0.0522876	140	LIHC	LIHC
5278	4	3	0.75	0	LGG	LGG
5318	5	5	0.106383	42	LGG	LGG
5319	2	2	0.25	6	LGG	LGG
5395	1	1	0.025641	38	LGG	LGG
5411	30	29	0.483333	30	GBM	GBM
5415	26	19	0.0791667	214	GBM	GBM
5429	319	319	0.893557	38	LUAD	LUAD
5442	8	2	0.0357143	48	HNSC	HNSC
5454	3	3	0.230769	10	KIRC	KIRC
5477	48	29	0.114173	206	LUSC	LUSC
5485	13	8	0.0457143	162	LUSC	LUSC
5492	24	18	0.118421	128	LUSC	LUSC
5503			0	0	PRAD	PRAD
5506			0	0	PRAD	PRAD
5629	88	57	0.123913	372	HNSC	HNSC
5633	3	2	0.153846	10	KIRC	KIRC
5635	1	1	0.2	4	KIRC	KIRC
5647	78	55	0.0653207	764	STAD	STAD
5651	13	10	0.0266667	362	GBM	GBM
5653075dfbef8dbf0fd2c89d49e162c3decfdf3b62db87ee57a7124937af2792	22	17	0.0894737	168	ESAD	ESAD
5656	31	25	0.172414	114	COAD	COAD
5659	12	12	0.315789	26	COAD	COAD
5670	55	33	0.0564103	530	LUSC	LUSC
568-24690-177S-27--568-25075N-302T-BLD	2	2	0.0357143	54	BE	BE
568-24693-177S-30--568-25075N-302T-BLD			0	24	BE	BE
568-24888-191U-31--568-25075N-302T-BLD	44	34	0.125	228	BE	BE
5693	3	1	0.0526316	16	KIRC	KIRC
5695	1	1	0.0909091	10	KIRC	KIRC
5723	13	2	0.019802	88	STAD	STAD
5724	53	32	0.0867209	316	STAD	STAD
5730	74	60	0.275229	144	STAD	STAD
575-24541-32W-30--575-25019N-181R-BLD	74	74	0.578125	54	BE	BE
575-25141-181R-28--575-25019N-181R-BLD	2	2	0.1	18	BE	BE
575-25147-181R-26--575-25019N-181R-BLD	1	1	0.025641	38	BE	BE
575-25150-32W-32--575-25019N-181R-BLD	3	3	0.103448	26	BE	BE
5750	6	5	0.119048	36	PRAD	PRAD
5763			0	0	PRAD	PRAD
5788	34	17	0.0404762	386	PRAD	PRAD
5789			0	0	PRAD	PRAD
5799	65	37	0.11315	262	STAD	STAD
57a0663fa71fd2018b62bf8a5a5090b31ca2a7bb834cf056d34a9ec8a9afdff8	56	37	0.0474359	724	ESAD	ESAD
5870	1	1	0.142857	6	LGG	LGG
5872	11	10	0.526316	8	LGG	LGG
5874	3	3	0.333333	6	LGG	LGG
5932	14	9	0.0957447	80	LUAD	LUAD
5960	21	12	0.048583	226	GBM	GBM
5964	2	1	0.125	6	LGG	LGG
5973	56	33	0.0837563	338	HNSC	HNSC
5987			0	2	KIRC	KIRC
5a14b5248d76d98bda5dbcd1450b97ed6d6924045908299241f47080e057b505	72	44	0.0700637	556	ESAD	ESAD
5a6c12d7e4141588ba41e5a07c2fdf878a57510ea4957fddbe1ce88e51d57864	108	47	0.0896947	416	ESAD	ESAD
5b557890e45f2aabf992413035f27efd8083136ab3672325e68f00b2431b6c40	37	19	0.0440835	394	ESAD	ESAD
5e49d3e75f5a5faefb000800dda151a99cb2efe29603c7437a4a234c88bbb383	60	24	0.12766	128	ESAD	ESAD
6011	34	19	0.0714286	232	HNSC	HNSC
6093			0	6	KIRC	KIRC
6146	7	6	0.352941	10	LUAD	LUAD
6177	3	3	0.0810811	34	STAD	STAD
6186	2	0	0	48	LGG	LGG
6215	14	8	0.117647	54	LUAD	LUAD
6225	50	33	0.146018	176	HNSC	HNSC
6228	44	25	0.0862069	246	HNSC	HNSC
623-24672-133N-36--623-24959N-133N-GST	1	1	0.0666667	14	BE	BE
625721c0e551208d32de7879e3cb04bb5cfe7573266d5aec45e58e306e186c70	36	22	0.0509259	396	ESAD	ESAD
626-24028-12X-34--626-25079N-194T-BLD	38	31	0.189024	126	BE	BE
626-24780-238S-34--626-25079N-194T-BLD	5	3	0.0229008	126	BE	BE
62d006ea1569dae280707516235efbb551613e782526764b4698ad19e66e1177	105	48	0.110855	328	ESAD	ESAD
635-24037-159M-30--635-25080N-95V-BLD	8	6	0.103448	50	BE	BE
635-24040-164S-33--635-25080N-95V-BLD	4	4	0.105263	34	BE	BE
6365	6	4	0.166667	18	PRAD	PRAD
6370			0	0	PRAD	PRAD
6375459929f5a6320351e3b8851211460359ccde0ca0d7e858aae8fdbdf77d73.2	53	33	0.0718954	406	ESAD	ESAD
6397	3	1	0.0909091	8	LGG	LGG
6407	10	5	0.0961538	42	LGG	LGG
6433	7	4	0.0597015	60	HNSC	HNSC
6452	6	6	0.428571	8	STAD	STAD
6467	10	7	0.076087	82	HNSC	HNSC
6472	11	8	0.0629921	116	HNSC	HNSC
6480	6	3	0.0319149	88	HNSC	HNSC
6519	54	40	0.0858369	412	STAD	STAD
6528	65	50	0.194553	192	STAD	STAD
65563f8e715e1117c73623defb3159d94318f41306526f79f5ba6134f72a925a	65	33	0.0493274	604	ESAD	ESAD
6591	76	52	0.140541	294	LUAD	LUAD
660-24058-213R-33--660-25082N-213R-BLD	173	157	0.333333	298	BE	BE
6650	21	21	0.259259	60	COAD	COAD
6665	23	19	0.0844444	202	LGG	LGG
6668	2	2	0.2	8	LGG	LGG
6669	3	1	0.2	2	LGG	LGG
66a2d0738fe38f5b696b89088016921a5ba68467844906a415ad9c13c23f3f82	11	9	0.0352941	244	ESAD	ESAD
6729b31463a1e912fe4187556be5de212ee7150ff1bbe2a9fabe990ef988484e	55	28	0.0475382	534	ESAD	ESAD
6780	7	3	0.0526316	50	COAD	COAD
6815	34	23	0.100877	194	STAD	STAD
6822	80	31	0.0344444	820	STAD	STAD
6840	75	49	0.124051	320	LUAD	LUAD
6843	37	22	0.0876494	214	LUSC	LUSC
6847	61	43	0.119777	298	LUAD	LUAD
6869	16	11	0.0733333	134	HNSC	HNSC
6872	103	58	0.0961857	500	HNSC	HNSC
6875	29	19	0.086758	190	STAD	STAD
6904b15afae6c2a0b1db92b5722ae54d1806030063ff51e3454e76193b2a5191	2	0	0	44	ESAD	ESAD
6956	39	24	0.0898876	228	HNSC	HNSC
6961	17	13	0.126214	86	HNSC	HNSC
6984	24	17	0.34	26	LUAD	LUAD
6986	4	4	0.333333	8	LUAD	LUAD
6994	45	25	0.102041	200	HNSC	HNSC
69f1b2078352cbdee29724b705114ad434578dbfadf5a8df2f82fdf3cde3f72b	17	8	0.0601504	116	ESAD	ESAD
6bb03952b5468708a1d1544dab4e4d542a649c1429f2b8e38877c2bf1abac6d4	76	32	0.0655738	412	ESAD	ESAD
6c53d8df4b1cabae706250c0eb7a58908a8f12cebf7812218513c0c4633e13c6	22	11	0.0462185	216	ESAD	ESAD
6e6ffd2fababfb900f63401a704f75dd8edd7e063f826d6da01789aa2df983d6	68	44	0.077193	502	ESAD	ESAD
6e8fdfbc1b6673a9e7f0753ee13f672156f7333fac3083316c7f2d2994019053	14	12	0.101695	104	ESAD	ESAD
7009	2	2	0.333333	4	LGG	LGG
70224ed441451a81fd89f696be5993bde735a85317aeeece976d443a155bb554	66	38	0.0772358	426	ESAD	ESAD
70224ed441451a81fd89f696be5993bde735a85317aeeece976d443a155bb554.2	56	32	0.0723982	386	ESAD	ESAD
7030			0	0	LUAD	LUAD
7075	10	4	0.0625	54	PRAD	PRAD
7079			0	0	PRAD	PRAD
7086	56	36	0.0759494	418	HNSC	HNSC
7136	33	24	0.0752351	286	STAD	STAD
7139	40	28	0.194444	104	LUSC	LUSC
7146	128	74	0.0991957	618	LUAD	LUAD
7158	5	3	0.111111	22	LUAD	LUAD
7169			0	20	PRAD	PRAD
7255	66	44	0.141935	244	HNSC	HNSC
7264	2	2	0.142857	12	LGG	LGG
7281	13	13	0.276596	34	LUAD	LUAD
729ae39c61839b5c6bb6d8ec86b4e41bd4073cc8fac262bd32732144b1608045	16	12	0.09375	112	ESAD	ESAD
730015334ef3a709c18445d6ceb35becf86f4fc5635f6117c5ae1646ffea4aee	64	38	0.0714286	468	ESAD	ESAD
7301	6	5	0.25	14	LGG	LGG
7304	20	14	0.189189	54	LGG	LGG
736816540afbfc3e46000e6c943e77f13e5f3c8e590750374d0b01e94448df78	18	10	0.0649351	136	ESAD	ESAD
7385	12	7	0.184211	26	HNSC	HNSC
7391	2	2	1	0	HNSC	HNSC
740-24247-138M-36--740-24960N-156N-GST	40	25	0.0862069	250	BE	BE
740-24250-138M-33--740-24960N-156N-GST	15	12	0.148148	66	BE	BE
740-24253-156N-35--740-24960N-156N-GST	16	7	0.0307018	212	BE	BE
740-24256-156N-33--740-24960N-156N-GST	28	22	0.0859375	228	BE	BE
7416	45	30	0.17341	128	HNSC	HNSC
7432	21	14	0.202899	48	HNSC	HNSC
74854df07d95b6b1a2132579094fef3b8c13e8f81875e20143f4e19e49e5f446	59	37	0.0449575	764	ESAD	ESAD
7487	2	2	0.25	6	LGG	LGG
7522	2	1	0.0454545	20	PRAD	PRAD
7582	28	15	0.0714286	182	LUSC	LUSC
75ce1bd6dbaf2d4ca50f51e6c1f2a09f3275b080539a07ac7ed962ae72c5179f	76	51	0.152695	258	ESAD	ESAD
7602			0	0	LGG	LGG
7675	24	16	0.186047	62	LGG	LGG
7689	22	20	0.434783	24	LGG	LGG
7695	2	2	0.5	2	LGG	LGG
772-24568-116N-34--772-24977N-116N-GST	15	11	0.0990991	96	BE	BE
772-24571-116N-36--772-24977N-116N-GST	25	22	0.167939	106	BE	BE
772-24577-123K-35--772-24977N-116N-GST	45	41	0.328	80	BE	BE
7722	5	2	0.0425532	42	STAD	STAD
7737	12	9	0.125	60	PRAD	PRAD
7744	11	2	0.0110497	170	PRAD	PRAD
7755	54	36	0.136364	210	LUSC	LUSC
7767	33	24	0.177778	102	LUSC	LUSC
779-24091-67M-31--779-21582N-67M-GST	10	9	0.102273	78	BE	BE
779-24094-67M-28--779-21582N-67M-GST	27	22	0.156028	114	BE	BE
77e647a05a7bc6591ccdaaab2bbdef656649418e52d8f02e6f7f5d63af2f50fb	58	24	0.115385	150	ESAD	ESAD
7806	3	2	0.0148148	132	STAD	STAD
7812	21	16	0.113475	120	LUSC	LUSC
7848bd725874b4f28f5c907834fab039f1c9489938a6d78b770e367be2973da9	95	48	0.0405063	1090	ESAD	ESAD
7943	57	39	0.128713	246	LUSC	LUSC
7bc2eb9cbd76f57405c4db1820c587932da2dc3bc5396e612eaa68aec71f434d	19	10	0.0606061	146	ESAD	ESAD
7c965565bb8202941bbc7995e015807e3817397353b46aed7fafd568ec445009	174	88	0.0617978	1250	ESAD	ESAD
7e5fe54682f97841fdf2cea1ac5a3a9b0944e8de6a5bab414be5953e4a122203	203	83	0.139028	394	ESAD	ESAD
8041	5	4	0.0701754	52	MALY	MALY
8042	27	15	0.0455927	302	MALY	MALY
8043	41	23	0.105991	176	MALY	MALY
8047	10	7	0.0795455	78	MALY	MALY
806-24154-225T-37--806-25035N-53S-BLD	2	2	0.0769231	24	BE	BE
806-24157-70V-34--806-25035N-53S-BLD	2	2	0.0666667	28	BE	BE
8104	11	7	0.0457516	142	LGG	LGG
815b14fc82802994d6234dbab1f4acf7fd67c3a1dc2c7b23418c82c61f08e91e	67	47	0.0692194	612	ESAD	ESAD
8171	30	16	0.0228571	670	LUAD	LUAD
8182	13	13	0.52	12	LGG	LGG
8245	19	12	0.0794702	132	STAD	STAD
826cb806c36242e06bda2a676b65446bc82ef365e10148aa36baec0b1afa872c	68	36	0.0849057	356	ESAD	ESAD
8277	60	36	0.09	340	LUSC	LUSC
8323	8	5	0.0806452	54	KICH	KICH
8325			0	0	KICH	KICH
8327	1	1	1	0	KICH	KICH
8328	6	4	0.153846	20	KICH	KICH
8330			0	0	KICH	KICH
8331	2	1	0.1	8	KICH	KICH
8332			0	0	KICH	KICH
8334			0	6	KICH	KICH
8337	1	1	1	0	KICH	KICH
8340			0	0	KICH	KICH
8341	45	27	0.0669975	358	KICH	KICH
8342			0	0	KICH	KICH
8343			0	2	KICH	KICH
8344			0	0	KICH	KICH
8346			0	4	KICH	KICH
8373	54	25	0.0356125	648	STAD	STAD
8381	4	3	0.115385	22	STAD	STAD
83e5f80b1c797b84fc0cb2cd64de1f93ba161fc7250d6638f1cfcdbfd8cbb1b6	26	17	0.0885417	166	ESAD	ESAD
8406			0	4	KICH	KICH
8407			0	2	KICH	KICH
8410	1	1	0.333333	2	KICH	KICH
8411			0	0	KICH	KICH
8416			0	2	KICH	KICH
8417			0	0	KICH	KICH
8418	1	1	0.111111	8	KICH	KICH
8422	1	1	1	0	KICH	KICH
8424	4	2	0.125	12	KICH	KICH
8425			0	4	KICH	KICH
8426	11	7	0.189189	26	KICH	KICH
8427	10	8	0.117647	58	KICH	KICH
8428	26	21	0.308824	42	KICH	KICH
8429	1	1	0.2	4	KICH	KICH
8430			0	16	KICH	KICH
8431			0	4	KICH	KICH
8432	1	1	1	0	KICH	KICH
8434	1	1	1	0	KICH	KICH
8435	9	2	0.0145985	128	KICH	KICH
8438			0	8	KICH	KICH
8440	2	0	0	0	KICH	KICH
8442			0	0	KICH	KICH
8443	43	22	0.0479303	416	KICH	KICH
8476			0	0	KICH	KICH
8477			0	0	KICH	KICH
85b73e9079e9cd6fd8efd465a1d7cb632075eebd61536049e6e3b9b3e2fd661a	86	58	0.0878788	574	ESAD	ESAD
86c633a436916422e25c43063f1d8fde99dfbcb303747adcce0d3da8cc1c3183	20	15	0.202703	54	ESAD	ESAD
875bfbff4c31a068c9824c557541698eea34f069a333d8aec6d2e6645a73d2fd	28	14	0.0344828	378	ESAD	ESAD
88-23692-18U-36--88-24991N-123S-BLD	1	0	0	46	BE	BE
88-23695-18U-35--88-24991N-123S-BLD	3	3	0.0461538	62	BE	BE
887c41c3bf89e0fe6d721f4407b024294f01af4937a412310681db9e9bb57e8c	63	32	0.0468521	620	ESAD	ESAD
891-24604-309R-31--891-25041N-75P-BLD	13	9	0.0491803	170	BE	BE
89bab9e7f417efbc02ba5fbf3fe14630c12cbbfde41420e1e822417f0ca843ad	37	28	0.129032	180	ESAD	ESAD
8cf58ec6aefc914022d30014ad2091b33ec3a4ee841d22ed964ec8d7ff515e61	61	45	0.124654	300	ESAD	ESAD
8debf2cb55d0f1b7011f183b83cc855caf6f06cbde5d34ff4449ac79b9f1abfb	45	21	0.0619469	294	ESAD	ESAD
8e4d0a4d30896e13a46ec1a156fd004b325aebb89e2a4bdcfce0d17f24356900	55	35	0.0572831	556	ESAD	ESAD
8eaf6e7cd7af4825a2dcaebc5dd3897ce05b6bc1e6b642e278059b92a8e3fe83	33	21	0.0623145	304	ESAD	ESAD
8ec9d907cdf12c3184889dbeded8466994a0cf8ce6aa8dea3d74eb94eaa238cc	48	27	0.0950704	236	ESAD	ESAD
900fdae05c90e27aba521996cc05d0a83e32dec27c271a8f14e59fa84439ed34	88	45	0.0650289	604	ESAD	ESAD
909-24523-161W-36--909-25086N-9U-BLD	5	5	0.172414	24	BE	BE
909-24529-41G-36--909-25086N-9U-BLD	2	2	0.1	18	BE	BE
909-24831-105U-35--909-25086N-9U-BLD			0	20	BE	BE
911-24619-11Y-25--911-25044N-6X-BLD	4	4	0.2	16	BE	BE
913ce613b66ab4f7fda444db13933c39c689bef153aaa1cbe05db00e4aa7a1a4	56	12	0.03	344	ESAD	ESAD
91b806330d0e632a29aac57bb4c22564728a6732fc25d7393a6075cc86ec86d8	75	36	0.0780911	386	ESAD	ESAD
929bd4be9261b766fed4e9b6eb5dc4ba79d4f9b74e9b2c36f23398835215b95a	27	16	0.0780488	178	ESAD	ESAD
92e63aeec5d5bfb17bdf90ebb4da303a859f9d663ef931cdd8fc89ec4d807919	10	8	0.111111	62	ESAD	ESAD
932be781385ee8928b7497f31bc76e2d39794e65797f0afed7f025f46f63de04	20	9	0.0238095	358	ESAD	ESAD
934fe84809fc20a81f124747d5ed57817eb0f9120ea63a69a1548d514710978f	66	39	0.0631068	552	ESAD	ESAD
942-24906-18X-38--942-25046N-166T-BLD	3	3	0.2	12	BE	BE
94c34e2475b3d421a3a49b49b8ef2fe278718a688445204887a53b76c720895e	23	19	0.0550725	322	ESAD	ESAD
954-24205-298T-35--954-25048N-259T-BLD	41	26	0.0938628	236	BE	BE
954-24208-298T-34--954-25048N-259T-BLD	31	27	0.12	194	BE	BE
954-24220-219U-34--954-25048N-259T-BLD	34	21	0.1	176	BE	BE
96abdb3df8257963934d256627e830afd34b535b61f1caff482994f8f85dbece	41	18	0.0342857	484	ESAD	ESAD
97a8da910044868e4b93f3bc66de54f863428a22b72f8e8c8896d562f7c970c3	24	17	0.274194	38	ESAD	ESAD
98011f8fb58fa8eed6171691d09d2ac7c67eb943046e45f70c47352c3a559887	10	9	0.0436893	196	ESAD	ESAD
995-24136-91W-31--995-25053N-119V-BLD	37	25	0.105485	200	BE	BE
997-24592-142W-30--997-25054N-122V-BLD	58	43	0.113158	322	BE	BE
997-24595-142W-33--997-25054N-122V-BLD	25	23	0.0734824	288	BE	BE
997-24598-184V-29--997-25054N-122V-BLD	30	18	0.0454545	366	BE	BE
997-24601-184V-32--997-25054N-122V-BLD	29	18	0.0487805	340	BE	BE
99febb5cb49a8d0e47fc43cb46c3c972af7077adde2b38b1919c294276ef563e	59	35	0.0909091	326	ESAD	ESAD
9aa3acd19da6ad36a8206d2dc11b4e8f54a1ba392aa4ae6ef853a174f016ab8d	1	0	0	64	ESAD	ESAD
9bede39d73b7a98225f1f8ea85d513c1739d6c55a43f8b284a41a49ec0c9a9df	10	8	0.045977	164	ESAD	ESAD
A01R	13	6	0.0487805	110	COAD	COAD
A01S	27	14	0.0732984	164	COAD	COAD
A01T	22	7	0.0388889	158	COAD	COAD
A01V	31	31	0.72093	12	COAD	COAD
A01X	116	116	0.90625	12	COAD	COAD
A02O	64	61	0.516949	54	COAD	COAD
A02Y	64	64	0.780488	18	COAD	COAD
A032	15	10	0.120482	68	COAD	COAD
A03F	130	128	0.969697	2	COAD	COAD
A03N	29	15	0.0592885	224	BRCA	BRCA
A04D	10	7	0.0357143	186	BRCA	BRCA
A04J	268	176	0.0657207	2410	BRCA	BRCA
A04Q	25	22	0.628571	10	BRCA	BRCA
A04T	82	52	0.0852459	528	BRCA	BRCA
A04X	47	33	0.0822943	354	BRCA	BRCA
A051	1	1	1	0	UCEC	UCEC
A052	87	67	0.147253	368	UCEC	UCEC
A053	48	27	0.0456081	544	UCEC	UCEC
A054	5	5	0.714286	2	UCEC	UCEC
A05A	28	18	0.036	472	UCEC	UCEC
A05D	61	40	0.0883002	392	UCEC	UCEC
A075	66	57	0.199301	220	BRCA	BRCA
A07B	113	61	0.153652	284	BRCA	BRCA
A07I	58	35	0.0394144	830	BRCA	BRCA
A08L	25	17	0.0428212	372	BRCA	BRCA
A08S	14	10	0.0387597	244	BRCA	BRCA
A092	25	21	0.207921	76	BRCA	BRCA
A09I	59	39	0.0519308	692	BRCA	BRCA
A0AT	139	106	0.102218	898	BRCA	BRCA
A0AV	45	27	0.0541082	454	BRCA	BRCA
A0B9	79	50	0.124688	322	BRCA	BRCA
A0BW	26	19	0.11875	134	BRCA	BRCA
A0C8	86	68	0.166667	322	BLCA	BLCA
A0CA			0	12	UCEC	UCEC
A0CC	72	42	0.109375	312	UCEC	UCEC
A0CE	39	32	0.151659	172	BRCA	BRCA
A0D0	84	60	0.0835655	634	BRCA	BRCA
A0D1	46	33	0.060219	502	BRCA	BRCA
A0D2	318	275	0.337838	496	BRCA	BRCA
A0D4	29	22	0.0596206	340	BRCA	BRCA
A0E0	30	29	0.315217	62	BRCA	BRCA
A0EA	3	3	0.6	2	BRCA	BRCA
A0EY	531	492	0.428198	618	BRCA	BRCA
A0G0	185	173	0.567213	120	BRCA	BRCA
A0G9	1	1	1	0	UCEC	UCEC
A0GJ	343	332	0.468265	366	UCEC	UCEC
A0H0	28	21	0.21	72	BRCA	BRCA
A0I1	70	45	0.093361	412	BRCA	BRCA
A0IQ	128	95	0.211111	322	BRCA	BRCA
A0J1	5	5	0.454545	6	UCEC	UCEC
A0J2	129	116	0.137931	712	BRCA	BRCA
A0JM	42	30	0.049505	564	BRCA	BRCA
A0JN	113	79	0.142857	440	UCEC	UCEC
A0K8	75	57	0.186885	230	UCEC	UCEC
A0L8	21	14	0.061674	206	UCEC	UCEC
A0L9	108	74	0.140684	418	UCEC	UCEC
A0LD	13	11	0.44	12	UCEC	UCEC
A0LH	77	68	0.238596	208	UCEC	UCEC
A0LO	6	6	0.428571	8	UCEC	UCEC
A0RE	77	67	0.258687	182	BRCA	BRCA
A0RU	167	158	0.455331	180	BRCA	BRCA
A0SM	19	15	0.0769231	176	BRCA	BRCA
A0TC			0	6	UCEC	UCEC
A0TD	4	2	0.5	0	UCEC	UCEC
A0TE	17	12	0.116505	86	UCEC	UCEC
A0TN	12	5	0.0531915	82	CESC	CESC
A0V8	58	39	0.0747126	464	UCEC	UCEC
A0VL	28	16	0.150943	78	CESC	CESC
A0WA	79	66	0.210863	234	BRCA	BRCA
A0Z2			0	8	THCA	THCA
A109	89	50	0.0713267	612	BRCA	BRCA
A10Q	9	6	0.109091	46	LIHC	LIHC
A11G	13	8	0.156863	38	UCEC	UCEC
A11H	6	1	0.0263158	32	UCEC	UCEC
A12H			0	12	BRCA	BRCA
A12L	73	43	0.0386343	1040	BRCA	BRCA
A12Q	96	59	0.081044	632	BRCA	BRCA
A130	223	167	0.170582	756	BRCA	BRCA
A13D	74	41	0.0476744	786	BRCA	BRCA
A13J	83	69	0.211009	244	BLCA	BLCA
A13W	2	0	0	14	THCA	THCA
A148	20	15	0.119048	106	MELA	MELA
A152	54	43	0.298611	90	BRCA	BRCA
A17K	16	9	0.0338346	250	UCEC	UCEC
A185	16	9	0.0661765	120	MELA	MELA
A18C	13	6	0.105263	44	UCEC	UCEC
A18R	27	19	0.0348624	518	BRCA	BRCA
A18U	170	114	0.107547	890	BRCA	BRCA
A191			0	0	THCA	THCA
A19D	5	3	0.0857143	30	MELA	MELA
A19E	68	46	0.127778	292	MELA	MELA
A19J	17	14	0.181818	60	MELA	MELA
A19L	25	19	0.0695971	248	MELA	MELA
A19T	133	60	0.0632244	816	MELA	MELA
A1A5	97	69	0.184	278	BLCA	BLCA
A1A6	72	47	0.101732	390	BLCA	BLCA
A1A7	141	90	0.10453	720	BLCA	BLCA
A1AY	17	11	0.0666667	148	BRCA	BRCA
A1BF	9	5	0.128205	30	CESC	CESC
A1BN	31	19	0.100529	158	CESC	CESC
A1CI	2	2	1	0	UCEC	UCEC
A1EH	9	8	0.228571	26	LIHC	LIHC
A1EJ	14	5	0.0233645	200	LIHC	LIHC
A1EL	21	10	0.126582	58	LIHC	LIHC
A1GS	49	39	0.104	326	UCEC	UCEC
A1GW	9	7	0.107692	56	UCEC	UCEC
A1HV	32	24	0.11215	182	MELA	MELA
A1HY	19	10	0.0529101	170	MELA	MELA
A1I0	43	25	0.0572082	394	MELA	MELA
A1I2	15	7	0.0804598	72	MELA	MELA
A1I8	46	29	0.122881	190	MELA	MELA
A1IC	4	4	0.666667	2	MELA	MELA
A1KW	100	61	0.0533217	1044	SARC	SARC
A1L0	325	168	0.0502242	3020	SARC	SARC
A1L2	141	82	0.0436867	1736	SARC	SARC
A1L3	81	24	0.0231437	956	SARC	SARC
A1LG	36	12	0.0566038	176	BRCA	BRCA
A1LK	94	72	0.154506	372	BRCA	BRCA
A1M8	15	10	0.114943	72	CESC	CESC
A1M9	5	2	0.0266667	70	CESC	CESC
A1MI	7	6	0.101695	52	CESC	CESC
A1ML	4	2	0.1	16	CESC	CESC
A1MY	46	30	0.0704225	380	UCEC	UCEC
A1NH	6	6	0.5	6	BRCA	BRCA
A1NN	51	37	0.120521	256	UCEC	UCEC
A1P8	42	28	0.164706	128	BRCA	BRCA
A1PC	94	70	0.2	256	BRCA	BRCA
A1PH	106	61	0.0927052	552	BRCA	BRCA
A1Q1	49	24	0.0441989	494	MELA	MELA
A1Q5	26	14	0.111111	100	MELA	MELA
A1QL	3	2	0.181818	8	THCA	THCA
A1Y8	74	49	0.112903	360	UCEC	UCEC
A1ZD	26	18	0.047619	352	MELA	MELA
A1ZK	140	82	0.0960187	714	MELA	MELA
A1ZP	13	9	0.079646	100	MELA	MELA
A1ZU	86	61	0.163978	286	MELA	MELA
A20P	31	19	0.112426	138	BLCA	BLCA
A20T	31	20	0.134228	118	BLCA	BLCA
A20V	97	68	0.143763	376	BLCA	BLCA
A217	51	33	0.0384168	808	LIHC	LIHC
A23B	13	7	0.0526316	120	LIHC	LIHC
A240	64	22	0.0277778	728	SARC	SARC
A24D	7	6	0.0689655	80	MELA	MELA
A25B	143	93	0.0944162	842	BRCA	BRCA
A25S	34	18	0.048913	334	LIHC	LIHC
A25T	5	4	0.0245399	158	LIHC	LIHC
A25Y	11	7	0.0985915	60	LIHC	LIHC
A262	23	14	0.0528302	242	MELA	MELA
A264	48	31	0.0759804	360	MELA	MELA
A26C	10	7	0.159091	34	MELA	MELA
A26J	19	14	0.164706	66	BRCA	BRCA
A26L	103	79	0.267797	192	UCEC	UCEC
A27C	7	5	0.0980392	44	BLCA	BLCA
A27F	22	14	0.0454545	286	BRCA	BRCA
A27H	63	36	0.0460948	718	BRCA	BRCA
A29B	8	6	0.0833333	64	MELA	MELA
A2BK	61	43	0.0970655	382	BRCA	BRCA
A2C5	79	57	0.194539	214	BLCA	BLCA
A2C9	92	67	0.105016	546	BRCA	BRCA
A2GN	14	11	0.127907	72	MELA	MELA
A2H5	82	42	0.0650155	564	UCEC	UCEC
A2HQ	59	43	0.142857	242	BLCA	BLCA
A2HS	10	5	0.0925926	44	LIHC	LIHC
A2HT	1	1	0.111111	8	LIHC	LIHC
A2IZ	90	20	0.0115607	1640	SARC	SARC
A2J0	125	51	0.0251355	1904	SARC	SARC
A2J4	22	5	0.00536481	910	SARC	SARC
A2KA	109	65	0.0522088	1136	LIHC	LIHC
A2KB	6	3	0.166667	12	LIHC	LIHC
A2KJ	53	47	0.238579	144	CESC	CESC
A2LA	80	40	0.148148	190	BLCA	BLCA
A2LK	10	8	0.125	54	BRCA	BRCA
A2LT	14	11	0.171875	50	CESC	CESC
A2LV	32	22	0.0866142	222	CESC	CESC
A2M5	13	7	0.162791	30	MELA	MELA
A2PK	8	7	0.12963	46	CESC	CESC
A2Q8			0	8	THCA	THCA
A2RL	23	22	0.247191	66	CESC	CESC
A2RM	54	42	0.135484	256	CESC	CESC
A3A7	30	11	0.0486726	196	LIHC	LIHC
A3AL	2	2	0.25	6	THCA	THCA
A3AQ			0	12	THCA	THCA
A3DV			0	0	THCA	THCA
A3ES	23	15	0.0909091	142	MELA	MELA
A3F3	47	34	0.164251	160	MELA	MELA
A3H1			0	8	THCA	THCA
A3I0	15	7	0.0510949	122	LIHC	LIHC
A3I1	28	19	0.148438	100	LIHC	LIHC
A3IL	34	24	0.235294	68	BLCA	BLCA
A3JI	22	17	0.0674603	230	MELA	MELA
A3K7	42	26	0.0553191	428	SARC	SARC
A3KA	122	92	0.139394	538	SARC	SARC
A3KN	18	16	0.235294	50	THCA	THCA
A3LT	101	41	0.0302137	1256	SARC	SARC
A3LU	37	18	0.0157205	1108	SARC	SARC
A3LW	67	39	0.0431894	836	SARC	SARC
A3LY	238	140	0.0635786	1964	SARC	SARC
A3M1	325	135	0.0369762	3326	SARC	SARC
A3M4	5	4	0.0597015	62	SARC	SARC
A3M5	51	39	0.110482	302	SARC	SARC
A3MF	6	4	0.111111	30	BLCA	BLCA
A3MO	19	13	0.0443686	274	MELA	MELA
A3N5	41	31	0.2	114	BLCA	BLCA
A3N6	4	4	0.037037	104	BLCA	BLCA
A3NJ	3	2	0.0689655	26	SARC	SARC
A3PH	25	15	0.12605	94	BLCA	BLCA
A3PJ	70	48	0.16	230	BLCA	BLCA
A3PN	8	6	0.12	42	SARC	SARC
A3R2	4	4	0.0571429	66	LIHC	LIHC
A3RE	30	21	0.058011	332	SARC	SARC
A3S3			0	4	THCA	THCA
A3SE	1	1	0.2	4	THCA	THCA
A3U5	138	81	0.0530799	1388	SARC	SARC
A3U6	39	28	0.0615385	416	SARC	SARC
A3U7	134	101	0.170608	458	SARC	SARC
A3XL	81	43	0.0506478	768	BRCA	BRCA
A3YB	54	31	0.0698198	390	ESSC	ESSC
A40Y	5	4	0.0701754	52	KIRP	KIRP
A43Z	67	41	0.0997567	344	SARC	SARC
A44B	9	7	0.0823529	76	KIRP	KIRP
A47M	1	1	0.333333	2	KIRP	KIRP
A47R	26	17	0.17	74	SARC	SARC
A48G	122	107	0.255981	296	SARC	SARC
A48U	11	10	0.169492	48	SARC	SARC
A496	62	55	0.101103	482	LIHC	LIHC
A49L	95	68	0.0832313	722	ESSC	ESSC
A49M	24	14	0.0666667	186	ESSC	ESSC
A4A1	42	24	0.0547945	396	ESSC	ESSC
A4A4	49	33	0.15493	164	ESSC	ESSC
A4AJ	40	32	0.301887	66	SARC	SARC
A4EI	17	11	0.186441	42	SARC	SARC
A4EK	1	1	0.0909091	10	SARC	SARC
A4G6	7	2	0.0327869	54	STAD	STAD
A4IH	20	19	0.24359	58	HNSC	HNSC
A4NA	14	7	0.0284553	232	LIHC	LIHC
A4NE	26	14	0.0518519	244	LIHC	LIHC
A4NG	10	3	0.0254237	108	LIHC	LIHC
A4OF	16	11	0.0696203	142	ESAD	ESAD
A4YX	7	4	0.0291971	130	STAD	STAD
A4ZQ	9	5	0.0649351	68	LIHC	LIHC
A4ZT	1	1	0.2	4	KIRP	KIRP
A50V	6	2	0.0196078	96	COAD	COAD
A560			0	0	KIRP	KIRP
A567	15	7	0.0886076	64	COAD	COAD
A56B	37	21	0.0721649	254	COAD	COAD
A57E	6	3	0.0428571	64	KIRP	KIRP
A5DF	30	10	0.0118765	812	LIHC	LIHC
A5DJ	6	2	0.0131579	146	KIRP	KIRP
A5EK	17	8	0.0509554	140	COAD	COAD
A5NI			0	0	KIRP	KIRP
A5NJ	4	4	0.25	12	KIRP	KIRP
A5NL			0	0	KIRP	KIRP
A5NO	66	28	0.0414201	610	LIHC	LIHC
A5NP	34	22	0.127907	138	LIHC	LIHC
A5NQ	7	5	0.217391	16	LIHC	LIHC
A5R7	23	17	0.124088	114	LGG	LGG
A5W3	29	23	0.193277	90	SARC	SARC
A5YV	9	5	0.2	16	COAD	COAD
A5YW	5	4	0.0547945	68	COAD	COAD
A61B	46	19	0.0313531	560	LGG	LGG
A6IA	55	44	0.0838095	470	SARC	SARC
A6VZ	40	27	0.103053	222	ESAD	ESAD
A6Z2	20	15	0.15	80	SARC	SARC
A7RK	18	15	0.178571	66	LGG	LGG
A7RV	10	7	0.057377	112	LGG	LGG
A8I1	51	41	0.0686767	546	ESSC	ESSC
A93C	19	12	0.0930233	110	ESAD	ESAD
A95T	24	22	0.189655	92	SARC	SARC
A97I	18	12	0.0588235	186	ESSC	ESSC
A9FQ	44	31	0.103333	256	ESSC	ESSC
A9GB	54	44	0.117021	322	SARC	SARC
CA-0005	9	4	0.0242424	156	PACA	PACA
CA-0009	40	27	0.18	110	PACA	PACA
CA-0016	3	3	0.6	2	LGG	LGG
CA-0033	100	42	0.0693069	506	MELA	MELA
CA-0037	36	26	0.232143	76	MELA	MELA
CA-0038	69	34	0.0579216	518	MELA	MELA
CA-0040	37	17	0.0568562	262	MELA	MELA
CA-0041	44	32	0.132231	198	MELA	MELA
CA-0042	83	51	0.135279	294	LUSC	LUSC
CA-0045	68	37	0.0948718	322	LUAD	LUAD
CA-0046	43	19	0.0964467	154	LUAD	LUAD
CA-0054	115	63	0.105175	484	LUAD	LUAD
CA-0056	59	30	0.0636943	412	LGG	LGG
CA-0057	4	2	0.02	96	LGG	LGG
CA-0058	34	19	0.131944	110	LIHC	LIHC
CA-0060	8	6	0.0491803	114	GBM	GBM
CA-0097	9	4	0.0130293	298	HNSC	HNSC
CA-0117	9	8	0.131148	52	LGG	LGG
CA-0120	21	9	0.191489	26	SARC	SARC
CA-0124	8	3	0.0189873	150	SARC	SARC
CA-0138	238	150	0.0775595	1696	BRCA	BRCA
CA-0140	11	5	0.0177936	270	GBM	GBM
CA-0157	39	24	0.0626632	344	MELA	MELA
CA-0159	5	3	0.142857	16	MELA	MELA
CA-0161	27	20	0.17094	90	MELA	MELA
CA-0163	15	5	0.0222222	210	GBM	GBM
CA-0181	25	16	0.231884	44	KIRC	KIRC
CA-0191	198	138	0.128731	874	BLCA	BLCA
CA-0193	23	19	0.208791	68	GBM	GBM
CA-0196	67	32	0.0876712	298	COAD	COAD
CA-0202	19	10	0.0869565	96	COAD	COAD
CA-0203	12	4	0.0377358	94	COAD	COAD
EGAN00001000368_EGAN00001000372	44	41	0.525641	34	BRCA	BRCA
EGAN00001000386_EGAN00001000380	71	55	0.214008	186	BRCA	BRCA
EGAN00001000588_EGAN00001000589	39	31	0.226277	98	BRCA	BRCA
EGAN00001000592_EGAN00001000593	23	13	0.0392749	308	BRCA	BRCA
EGAN00001000594_EGAN00001000595	199	117	0.0804124	1256	BRCA	BRCA
EGAN00001000596_EGAN00001000597	62	39	0.0647841	540	BRCA	BRCA
EGAN00001000745_EGAN00001000746	52	33	0.198795	114	BRCA	BRCA
EGAN00001001177_EGAN00001000752	58	36	0.0717131	444	BRCA	BRCA
EGAN00001018603_EGAN00001018604	39	20	0.0353982	526	BRCA	BRCA
EGAN00001018607_EGAN00001018608	72	51	0.121429	348	BRCA	BRCA
EGAN00001018611_EGAN00001018612	51	41	0.0772128	480	BRCA	BRCA
EGAN00001030465_EGAN00001030466	224	171	0.186275	694	BRCA	BRCA
EGAN00001030469_EGAN00001030470	44	34	0.0622711	502	BRCA	BRCA
EGAN00001030778_EGAN00001030894	60	56	0.373333	90	BRCA	BRCA
EGAN00001030890_EGAN00001030891	82	52	0.0948905	466	BRCA	BRCA
EGAN00001030897_EGAN00001030898	12	11	0.203704	42	BRCA	BRCA
EGAN00001036482_EGAN00001036483	11	7	0.044586	146	BRCA	BRCA
EGAN00001269437_EGAN00001269438	4	4	0.666667	2	BRCA	BRCA
EGAN00001269439_EGAN00001269440	7	7	0.0786517	82	BRCA	BRCA
EGAN00001269441_EGAN00001269442	41	22	0.0280255	744	BRCA	BRCA
EGAN00001269443_EGAN00001269444	1	1	1	0	BRCA	BRCA
EGAN00001269445_EGAN00001269446	71	46	0.0770519	526	BRCA	BRCA
EGAN00001269459_EGAN00001269460	4	1	0.0333333	26	BRCA	BRCA
EGAN00001269463_EGAN00001269464	175	136	0.187586	550	BRCA	BRCA
EGAN00001269467_EGAN00001269468	2	2	1	0	BRCA	BRCA
EGAN00001269469_EGAN00001269470	28	27	0.613636	16	BRCA	BRCA
EGAN00001269473_EGAN00001269474	72	46	0.156463	222	BRCA	BRCA
EGAN00001269475_EGAN00001269476	89	75	0.210084	268	BRCA	BRCA
EGAN00001269483_EGAN00001269484	60	46	0.128492	298	BRCA	BRCA
EGAN00001269485_EGAN00001269486	68	44	0.111675	326	BRCA	BRCA
EGAN00001269493_EGAN00001269494	53	39	0.0909091	376	BRCA	BRCA
EGAN00001269497_EGAN00001269498	16	15	0.416667	20	BRCA	BRCA
EGAN00001269503_EGAN00001269504	24	24	0.387097	38	BRCA	BRCA
EGAN00001269505_EGAN00001269506	27	16	0.0471976	312	BRCA	BRCA
EGAN00001269509_EGAN00001269510	7	7	0.538462	6	BRCA	BRCA
EGAN00001269511_EGAN00001269512	39	19	0.0883721	176	BRCA	BRCA
EGAN00001269521_EGAN00001269522	4	4	0.5	4	BRCA	BRCA
EGAN00001269523_EGAN00001269524	24	17	0.11039	130	BRCA	BRCA
EGAN00001269525_EGAN00001269526			0	22	BRCA	BRCA
EGAN00001269527_EGAN00001269528	77	56	0.118896	394	BRCA	BRCA
EGAN00001269531_EGAN00001269532	57	50	0.104822	420	BRCA	BRCA
EGAN00001269533_EGAN00001269534	3	3	1	0	BRCA	BRCA
EGAN00001269543_EGAN00001269544	3	1	0.142857	4	BRCA	BRCA
EGAN00001269547_EGAN00001269548	16	14	0.4375	16	BRCA	BRCA
EGAN00001269549_EGAN00001269550	209	137	0.135778	800	BRCA	BRCA
EGAN00001269551_EGAN00001269552	48	39	0.0866667	402	BRCA	BRCA
EGAN00001269553_EGAN00001269554	1	1	0.0909091	10	BRCA	BRCA
EGAN00001269561_EGAN00001269562	19	16	0.103226	136	BRCA	BRCA
EGAN00001269565_EGAN00001269566	58	37	0.0687732	480	BRCA	BRCA
EGAN00001269567_EGAN00001269568	2	2	0.333333	4	BRCA	BRCA
EGAN00001269569_EGAN00001269570	46	15	0.0360577	370	BRCA	BRCA
EGAN00001269575_EGAN00001269576	50	38	0.166667	178	BRCA	BRCA
EGAN00001269577_EGAN00001269578	29	22	0.0986547	194	BRCA	BRCA
EGAN00001269579_EGAN00001269580	172	143	0.362944	222	BRCA	BRCA
EGAN00001269581_EGAN00001269582	80	54	0.0545455	910	BRCA	BRCA
EGAN00001269583_EGAN00001269584	5	5	0.263158	14	BRCA	BRCA
EGAN00001269589_EGAN00001269590	18	10	0.135135	56	BRCA	BRCA
EGAN00001269593_EGAN00001269594	31	28	0.18543	120	BRCA	BRCA
EGAN00001269603_EGAN00001269604	75	53	0.146814	286	BRCA	BRCA
EGAN00001269605_EGAN00001269606	47	26	0.0635697	362	BRCA	BRCA
EGAN00001269607_EGAN00001269608	84	70	0.230263	220	BRCA	BRCA
EGAN00001269609_EGAN00001269610	22	12	0.0857143	118	BRCA	BRCA
EGAN00001269613_EGAN00001269614	141	117	0.194676	460	BRCA	BRCA
EGAN00001269621_EGAN00001269622	54	43	0.186957	176	BRCA	BRCA
EGAN00001269627_EGAN00001269628	125	78	0.0762463	898	BRCA	BRCA
EGAN00001269629_EGAN00001269630	6	4	0.0606061	60	BRCA	BRCA
EGAN00001269631_EGAN00001269632	61	34	0.0423412	742	BRCA	BRCA
LU-42			0	0	LUAD	LUAD
LU-6	20	17	0.274194	42	LUAD	LUAD
LU-69	80	65	0.119048	466	LUAD	LUAD
LU-89	15	12	0.342857	20	LUAD	LUAD
LU-F13	13	9	0.176471	38	LUAD	LUAD
LU-F2			0	6	LUAD	LUAD
LU-F6	3	2	0.4	2	LUAD	LUAD
LU-FF24	43	27	0.0801187	294	LUAD	LUAD
LU-FF34	7	6	0.545455	4	LUAD	LUAD
LU-FF37	2	2	0.0625	30	LUAD	LUAD
LU-FF4	17	13	0.0896552	128	LUAD	LUAD
LU-FF58			0	2	LUAD	LUAD
LU-FF62	63	39	0.112392	284	LUAD	LUAD
LU-FF67	7	5	0.333333	8	LUAD	LUAD
LU-FF71			0	0	LUAD	LUAD
LU-FF77	7	3	0.047619	56	LUAD	LUAD
LU-FF78	14	12	0.139535	72	LUAD	LUAD
MELA_0001	237	185	0.195767	708	MELA	MELA
MELA_0002	134	97	0.0672677	1308	MELA	MELA
MELA_0003	68	21	0.009375	2172	MELA	MELA
MELA_0004	80	57	0.0934426	530	MELA	MELA
MELA_0005	83	60	0.1222	408	MELA	MELA
MELA_0006	49	45	0.348837	80	MELA	MELA
MELA_0007	102	85	0.113333	648	MELA	MELA
MELA_0008	84	70	0.220126	234	MELA	MELA
MELA_0010	101	70	0.070922	886	MELA	MELA
MELA_0011	210	200	0.653595	96	MELA	MELA
MELA_0012	149	114	0.107042	916	MELA	MELA
MELA_0014	142	104	0.0636475	1492	MELA	MELA
MELA_0015	33	20	0.0479616	384	MELA	MELA
MELA_0016	12	8	0.137931	46	MELA	MELA
MELA_0022	8	5	0.0462963	100	MELA	MELA
MELA_0028	45	41	0.221622	140	MELA	MELA
MELA_0029	13	9	0.191489	34	MELA	MELA
MELA_0030	114	85	0.0634328	1226	MELA	MELA
MELA_0034	3	3	0.0769231	36	MELA	MELA
MELA_0035	13	10	0.175439	44	MELA	MELA
MELA_0037	8	8	0.0909091	80	MELA	MELA
MELA_0039	1	1	0.111111	8	MELA	MELA
MELA_0041	10	4	0.0434783	82	MELA	MELA
MELA_0043	17	10	0.0460829	200	MELA	MELA
MELA_0044	26	21	0.109375	166	MELA	MELA
MELA_0047	12	10	0.1	88	MELA	MELA
MELA_0048	78	44	0.049217	816	MELA	MELA
MELA_0049	15	8	0.0551724	130	MELA	MELA
MELA_0050	33	25	0.13089	158	MELA	MELA
MELA_0052	61	54	0.255924	150	MELA	MELA
MELA_0055	36	35	0.388889	54	MELA	MELA
MELA_0057	107	76	0.170022	340	MELA	MELA
MELA_0058	56	55	0.352564	100	MELA	MELA
MELA_0059	247	143	0.062201	2052	MELA	MELA
MELA_0061	27	19	0.0926829	178	MELA	MELA
MELA_0063	10	10	0.714286	4	MELA	MELA
MELA_0064	136	91	0.112624	672	MELA	MELA
MELA_0065	96	27	0.0266798	916	MELA	MELA
MELA_0067	47	23	0.0177606	1248	MELA	MELA
MELA_0068	21	14	0.0474576	274	MELA	MELA
MELA_0069	101	86	0.101058	750	MELA	MELA
MELA_0070	73	44	0.0539877	742	MELA	MELA
MELA_0071	79	33	0.0175625	1800	MELA	MELA
MELA_0072	25	5	0.008	600	MELA	MELA
MELA_0075	7	4	0.0506329	72	MELA	MELA
MELA_0076	7	7	0.0786517	82	MELA	MELA
MELA_0078	13	9	0.142857	50	MELA	MELA
MELA_0080	2	2	0.0416667	46	MELA	MELA
MELA_0081	116	56	0.0349563	1486	MELA	MELA
MELA_0082	7	6	0.109091	48	MELA	MELA
MELA_0083	6	3	0.03	94	MELA	MELA
MELA_0098	69	46	0.152824	232	MELA	MELA
MELA_0102	32	20	0.10101	166	MELA	MELA
MELA_0103	31	24	0.091954	230	MELA	MELA
MELA_0104	19	16	0.225352	52	MELA	MELA
MELA_0105	10	8	0.0533333	140	MELA	MELA
MELA_0107	53	32	0.0532446	548	MELA	MELA
MELA_0108	9	6	0.122449	40	MELA	MELA
MELA_0110	12	8	0.0714286	100	MELA	MELA
MELA_0114	51	45	0.248619	130	MELA	MELA
MELA_0116	17	16	0.0958084	150	MELA	MELA
MELA_0118	21	17	0.0748899	206	MELA	MELA
MELA_0119	25	21	0.157895	108	MELA	MELA
MELA_0121	17	11	0.0322581	324	MELA	MELA
MELA_0122	24	19	0.143939	108	MELA	MELA
MELA_0135	19	8	0.0205656	370	MELA	MELA
MELA_0160	38	32	0.158416	164	MELA	MELA
MELA_0161	38	37	0.528571	32	MELA	MELA
MELA_0163	32	30	0.11194	236	MELA	MELA
MELA_0164	38	29	0.0587045	456	MELA	MELA
MELA_0166	62	45	0.117801	320	MELA	MELA
MELA_0167	37	28	0.042879	616	MELA	MELA
MELA_0168	18	14	0.134615	86	MELA	MELA
MELA_0170	17	12	0.0754717	142	MELA	MELA
MELA_0174	14	10	0.0505051	184	MELA	MELA
MELA_0176	31	26	0.114537	196	MELA	MELA
MELA_0177	11	10	0.0719424	128	MELA	MELA
MELA_0178	60	51	0.225664	166	MELA	MELA
MELA_0179	13	12	0.16	62	MELA	MELA
MELA_0181	20	11	0.0130332	824	MELA	MELA
MELA_0182	6	4	0.0606061	60	MELA	MELA
MELA_0183	50	44	0.229167	142	MELA	MELA
MELA_0185	11	11	0.0940171	106	MELA	MELA
MELA_0187	33	20	0.029985	634	MELA	MELA
MELA_0188	12	11	0.1375	68	MELA	MELA
MELA_0190	2	2	0.0454545	42	MELA	MELA
MELA_0192	17	13	0.126214	86	MELA	MELA
MELA_0193	100	80	0.147601	442	MELA	MELA
MELA_0195	18	15	0.133929	94	MELA	MELA
MELA_0196	17	15	0.0847458	160	MELA	MELA
MELA_0197	17	14	0.168675	66	MELA	MELA
MELA_0199	23	17	0.21519	56	MELA	MELA
MELA_0201	29	25	0.147929	140	MELA	MELA
MELA_0202	24	17	0.0720339	212	MELA	MELA
MELA_0203	7	3	0.0461538	58	MELA	MELA
MELA_0204	6	4	0.0165289	236	MELA	MELA
MELA_0205	5	4	0.0851064	42	MELA	MELA
MELA_0206	80	56	0.0618102	826	MELA	MELA
MELA_0207	5	2	0.0194175	98	MELA	MELA
MELA_0210	6	5	0.104167	42	MELA	MELA
MELA_0211	8	7	0.102941	60	MELA	MELA
MELA_0212	6	4	0.0434783	86	MELA	MELA
MELA_0214	9	8	0.064	116	MELA	MELA
MELA_0215	21	19	0.165217	94	MELA	MELA
MELA_0216	8	7	0.12963	46	MELA	MELA
MELA_0218	2	0	0	0	MELA	MELA
MELA_0220	5	5	0.121951	36	MELA	MELA
MELA_0221	56	42	0.0660377	580	MELA	MELA
MELA_0222			0	0	MELA	MELA
MELA_0223	45	23	0.0901961	210	MELA	MELA
MELA_0225	63	42	0.0680713	554	MELA	MELA
MELA_0227	17	10	0.0729927	120	MELA	MELA
MELA_0230	52	36	0.0405405	836	MELA	MELA
MELA_0231	366	256	0.0993018	2212	MELA	MELA
MELA_0232	7	4	0.0701754	50	MELA	MELA
MELA_0234	33	22	0.100457	186	MELA	MELA
MELA_0236	7	5	0.111111	38	MELA	MELA
MELA_0237	5	5	0.0617284	76	MELA	MELA
MELA_0238	19	12	0.0621762	174	MELA	MELA
MELA_0239	16	12	0.0666667	164	MELA	MELA
MELA_0240	25	20	0.145985	112	MELA	MELA
MELA_0243	13	8	0.0695652	102	MELA	MELA
MELA_0244	14	10	0.104167	82	MELA	MELA
MELA_0250	11	8	0.0720721	100	MELA	MELA
MELA_0251	27	19	0.124183	126	MELA	MELA
MELA_0253	25	16	0.0864865	160	MELA	MELA
MELA_0254	25	18	0.0444444	380	MELA	MELA
MELA_0255	16	9	0.0576923	140	MELA	MELA
MELA_0256	24	22	0.119565	160	MELA	MELA
MELA_0257	5	5	0.106383	42	MELA	MELA
MELA_0261	9	5	0.027933	170	MELA	MELA
MELA_0262	4	4	0.0384615	100	MELA	MELA
P01-28	41	29	0.16763	132	PRAD	PRAD
P03-1426	18	13	0.065	182	PRAD	PRAD
P05-3852	14	6	0.0384615	142	PRAD	PRAD
P07-5021	8	7	0.12069	50	PRAD	PRAD
P07-837	31	20	0.043956	424	PRAD	PRAD
P08-1042	4	1	0.0138889	68	PRAD	PRAD
P08-1541	17	10	0.0492611	186	PRAD	PRAD
P08-217	1	1	0.027027	36	PRAD	PRAD
P08-501	21	14	0.164706	64	PRAD	PRAD
P08-5852	3	2	0.0606061	30	PRAD	PRAD
P08-716	11	5	0.0314465	148	PRAD	PRAD
P09-396	2	2	1	0	PRAD	PRAD
P09-628	8	7	0.0744681	86	PRAD	PRAD
P09-730	5	3	0.157895	14	PRAD	PRAD
PM1002-Z1-1	252	105	0.0443787	2114	PRAD	PRAD
PM1011-Z3-1	20	13	0.216667	40	LGG	LGG
PM1025-Z1-1	58	48	0.545455	30	LGG	LGG
PM1089-Z2-1	28	16	0.0490798	298	CESC	CESC
PM1124-Z2-1	3	2	0.0444444	42	LGG	LGG
PM1139-Z2-1	4	3	0.0576923	48	LGG	LGG
PM1177-Z1-1	19	6	0.0210526	266	PRAD	PRAD
PM12-Z10-1	10	4	0.0363636	100	PRAD	PRAD
PM1226-Z6-1	3	3	0.333333	6	LGG	LGG
PM1230-Z1	12	2	0.0175439	102	COAD	COAD
PM1301-Z1	94	60	0.107914	462	GBM	GBM
PM1341-Z2	25	10	0.021978	430	PACA	PACA
PM1388-Brain	127	110	0.575916	64	PRAD	PRAD
PM1396-X1-1	76	41	0.0587393	622	PRAD	PRAD
PM1411-X1-1	13	10	0.0869565	102	PRAD	PRAD
PM1461-Z1-1	45	34	0.206061	120	LGG	LGG
PM1462-Z1	12	5	0.0257732	182	PACA	PACA
PM1504-X1-1	11	2	0.00796813	240	PRAD	PRAD
PM1570-Z1-1	11	10	0.10101	88	PRAD	PRAD
PM159-Z1-1	34	19	0.039916	442	PRAD	PRAD
PM159-Z6-1	20	14	0.0281124	478	PRAD	PRAD
PM159-Z7-1	23	14	0.0294737	452	PRAD	PRAD
PM316-Z17	13	7	0.0300429	220	KIRC	KIRC
PM322-Z5-1	35	22	0.0383944	538	PRAD	PRAD
PM63-Z3-1	74	43	0.0653495	584	PRAD	PRAD
PM63-Z6-1	75	46	0.0700152	582	PRAD	PRAD
PM631-Z1	12	9	0.115385	66	STAD	STAD
PM650-Z1	2	2	0.0147059	134	PRAD	PRAD
PM677-Z12-1	22	12	0.0273973	416	PRAD	PRAD
PM677-Z16-1	26	15	0.0347222	406	PRAD	PRAD
PM677-Z7-1	27	16	0.0342612	440	PRAD	PRAD
PM677-Z9-1	24	16	0.0349345	434	PRAD	PRAD
PM692-Z3-1	8	3	0.0205479	138	GBM	GBM
PM748-Z26-1	2	1	0.0263158	36	BLCA	BLCA
PM767-Z1-1	22	9	0.0271084	310	PRAD	PRAD
PM773-X1	26	17	0.121429	114	PACA	PACA
PM846-Z2-1	4	2	0.008	246	GBM	GBM
PM861-Z5-1	548	523	0.627098	286	PRAD	PRAD
PM877-Z2-1	49	41	0.183857	174	GBM	GBM
PM883-Z2-1	7	7	0.0804598	80	GBM	GBM
PM884-Z13-1	25	23	0.353846	40	GBM	GBM
PM90-Z1-1	47	30	0.117647	208	PRAD	PRAD
PM90-Z19-1	2	1	0.0333333	28	PRAD	PRAD
PM919-Z2-1	12	5	0.0961538	40	LGG	LGG
PM922-Z2	112	65	0.059633	978	KIRP	KIRP
PM935-Z1-1	20	9	0.0378151	218	GBM	GBM
PM948-Z4-1	33	19	0.0954774	166	LGG	LGG
PM992-X1-1	27	10	0.0146843	654	PRAD	PRAD
PR-03-3125	11	8	0.0672269	108	PRAD	PRAD
PR-03-728			0	0	PRAD	PRAD
PR-04-1243	26	16	0.0833333	166	PRAD	PRAD
PR-0410	2	2	1	0	PRAD	PRAD
PR-05-3595	13	9	0.0857143	92	PRAD	PRAD
PR-06-1749	40	29	0.0575397	464	PRAD	PRAD
PR-07-3258	70	46	0.511111	20	PRAD	PRAD
PR-07-4610	6	5	0.0378788	126	PRAD	PRAD
PR-08-2153	2	1	0.0121951	80	PRAD	PRAD
PR-08-4154	8	2	0.0322581	54	PRAD	PRAD
PR-08-784	10	10	0.294118	24	PRAD	PRAD
PR-09-146	5	4	0.114286	30	PRAD	PRAD
PR-2741	17	16	0.141593	96	PRAD	PRAD
PR-3042	60	32	0.0342612	874	PRAD	PRAD
PR-4240	82	52	0.0935252	474	PRAD	PRAD
PR-7520	32	21	0.0525	368	PRAD	PRAD
PR-STID0000000415	9	4	0.038835	94	PRAD	PRAD
PR-STID0000002872			0	6	PRAD	PRAD
a293752317dee4bd4904cb5d2a081581e8472f6445709fb2c0f45ee85217990d	63	33	0.0861619	320	ESAD	ESAD
a46434e58a34e0e99f630629c94f09d33e002444d02c39269165de26d985718d	54	34	0.0779817	382	ESAD	ESAD
a575fa3a084b236bdcc6c02c119e643d4bdd9cb84bcac4716fca07bc2b74fcf1	43	17	0.0453333	332	ESAD	ESAD
a5cf51cebbb267ad48366801701eb3a8ec788f9ecff83b6635df09eff4c4a13d	56	31	0.0547703	510	ESAD	ESAD
a624a0c1c1913bae5bbae8811ee75a6c5150308de7321ab7ac13247677335bfa	52	35	0.0921053	328	ESAD	ESAD
a6d223164cca3826d327c57ac731da9f25584747d5f07781052aff2443d4ab2e	84	34	0.10828	230	ESAD	ESAD
a8abb113e589e360a9aaa31db4883f56206e49bc70b6d3577eb4736ba40018d7	31	16	0.0361174	412	ESAD	ESAD
a968458c4aa5fb6e51d777b44f5fd8f0c563732d2c2a7ec5dc93cd5f8695407a	27	22	0.0726073	276	ESAD	ESAD
aa65a09b407bbeb0954d4632fd062dd8487c6fd8cdcfbc6ee25213fbe40f184c	60	33	0.0622642	470	ESAD	ESAD
ababdefc84d79651cc5cbee04223ebff2d3479f79542ab018ed7dd62c21fbb06	41	19	0.0388548	448	ESAD	ESAD
ad911862aca0a6b42d094875b3135f5a8e850ce1a11394dca9913cda419fe972	45	26	0.0549683	428	ESAD	ESAD
af2e66fc3118bd5100b0d503caedda230b2b515a097537f873cd0190a115d44f	68	37	0.0719844	446	ESAD	ESAD
b095be882857633de948faf0619072298aa64461fd058af02352f8961c273320	69	33	0.115789	216	ESAD	ESAD
b1e3464f5718a6c674ee1a8da4a92ab7cc4f892e1b2e7a25cc7401f5c734124e	27	20	0.0470588	398	ESAD	ESAD
b83276e275db581581238ffb61e2680ef11a9bb54ad19bc8f70fbee175d10b5d	58	35	0.130597	210	ESAD	ESAD
b8b7637a8d22837847d02df6a4587bd93fcd2c9ed21ef04893336f3c7dd6ddba	139	66	0.0775558	712	ESAD	ESAD
b8bfd29057a30c787f3ce32ad6fd64aeb349043a52c25d917cb28644bc0a48a0	26	14	0.0614035	202	ESAD	ESAD
bb12d9bb26703270e2fcfbff31177ae565874daf2528647fedd249b6c2935cf2	38	16	0.0325203	454	ESAD	ESAD
bd8b41d77f905bd068f01e8ac5dc0b7ef04d8ac2215d4154c0738348b8918278	87	57	0.142857	312	ESAD	ESAD
be676cca94bc8602cb0eef47fafa62ae3665d31d7eae696604c0b2d1c11a4cbd	14	8	0.0357143	210	ESAD	ESAD
be968792772699a12e22c87670fa3f80e7c142271bdd98b62f4fb62f8fd4595c	98	54	0.0557851	870	ESAD	ESAD
c4576ef6950092fd647b7e0ccdf5e46cbfa3da5648f93f5e8c40f76bbf59fad3	48	19	0.133803	94	ESAD	ESAD
c4577b94393c6a47c5033065ba9a879329432ceb9cb8b6ee590c9023e0c9efb5	42	21	0.0719178	250	ESAD	ESAD
c6872050642efc50838c33494a3f26c7a912efcda4b2d355306aab91b8a77db4	49	28	0.0962199	242	ESAD	ESAD
c72589bc8e2b3e3e7373fbf0b5adb4c67dfb65afa28950d68bc08e94b4e5f6e6	20	13	0.0550847	216	ESAD	ESAD
c8520defc94e82f4984f47e47d452a9d06d0643704636037feb2782a757df487	39	22	0.02977	700	ESAD	ESAD
c92b6c3dc5d7ab373cca89e4261a451f1a5d86b4d5bc05d7136fabb995f4d353			0	60	ESAD	ESAD
ca5d2c19174791eda451f1994223b4c5b78a668e5b135230f5149eb7d65a97d3	30	26	0.0942029	246	ESAD	ESAD
ca7711a3704bf6c3c53c8da9151d70fb1b412e52dab8a03e3380611d9669e750	43	23	0.0678466	296	ESAD	ESAD
cb69d1fba616ddc3cedf635f4a60d4e5a10e7206e091253e753900a02eac908e	33	26	0.0645161	370	ESAD	ESAD
cdbcf2fc8ac3cd58a70dadea86a7d583d51754be9a38177c868368d3b1481976	25	19	0.0690909	250	ESAD	ESAD
d06edce9bcfc01daaf65ac43244b76ff54a7a6b548ae7dc38c4bfcc0c04dcdcd	36	22	0.0621469	318	ESAD	ESAD
d0f07dbe50b17d281d72e7f09b962f4e75e676ff37d2497a1f6c721b17148d66	19	11	0.0285714	366	ESAD	ESAD
d1d692f974e6dbbf5cc7610bed5e488d3d142979c7f3b01e199b273d70bd7fb8	39	28	0.0930233	262	ESAD	ESAD
d20a89efc7cea30166cb218ed5c1648db76ed824426a7b58ba50cbbe39191475	3	1	0.111111	6	ESAD	ESAD
d2588a7edd6efd35550bc49ebb03aae4445eec879c3a29a0c15e5a73654f2d04	73	28	0.0661939	350	ESAD	ESAD
d2588a7edd6efd35550bc49ebb03aae4445eec879c3a29a0c15e5a73654f2d04.2	83	33	0.0776471	342	ESAD	ESAD
d2736f3a3d17df5d3dd2fcb76ecd3043e35464dd05b5b86e3722d86578c68eef	41	30	0.0671141	406	ESAD	ESAD
d2f9a56f010f5bc0e3d65890a416e91d6ce69b2bcb1c0f76de9345dd835fe6bb	57	35	0.0462351	700	ESAD	ESAD
d4c95d7413e88f9739a2fb25dfdddb938f57520c6d76a454a6c3d037ea9ff977	34	17	0.0752212	192	ESAD	ESAD
d91afc2f2ce5e663c474bccf20ea8abd1fdcf1a1d735d8422712b36ea154040e	111	64	0.0937042	572	ESAD	ESAD
d9ae1705ce0b4462ff82a46be3d5304819ffddc3715bbb6afd6e6181b8519846	40	23	0.234694	58	ESAD	ESAD
d9b28bce2ac1e8c6a6ea51c8363ea95bf522dea7876935acb451648cfe407994	56	39	0.115385	282	ESAD	ESAD
ddbe3673feb6caaa40694506650420d1feeb0bd3de13ee81576efb6322e79ee1	23	13	0.0577778	202	ESAD	ESAD
e1b2d7684cd7ed797f54d3996d6e5ddde59728fc88304ef2ca66b0b8593dd4ff	14	9	0.045	186	ESAD	ESAD
e26373e3064c37d6a8bc3cd736998e37a396e3f84e46ee0fb03d1d5d99a76c53	43	28	0.0591966	430	ESAD	ESAD
e308def3a33079a84267fe54fe2e611bcf37616a0b05c1a6586db411f5fa1086	49	30	0.102389	244	ESAD	ESAD
e3271ccee7d736f7a876d8582ce224239ba68d7558af1f46de04e7024b9511c3	25	13	0.0440678	270	ESAD	ESAD
e371d3d80a557bcca0c432e286e31b320554ca59adccb179f38e5c3bbb2a0a0e	40	29	0.102837	242	ESAD	ESAD
e47a532bbb49cb08688ac3d50b5229d72adb20ab9182dffbe43f7330533d89d9	21	19	0.218391	66	ESAD	ESAD
e4831d0fe318c0dfe320eb9be0148336ad1a096e5a3f8675fe517ec2b5d82de6	23	11	0.0241758	432	ESAD	ESAD
e690adbb9f70f16aad05be4aedda090d0c444522844f6f8d51df380106e4ce49	137	38	0.0392968	830	ESAD	ESAD
e6c11c6fb5881ea37c29f9a93b0fca175c770670e1571034d32b3ad098b761ab	92	57	0.072335	696	ESAD	ESAD
e7af9a8f5176677e829f051de9d912d834c516322635042e4780a570683898ab	31	16	0.0217687	704	ESAD	ESAD
ea9ee2acb5fbb50f049bddc8297fe4cb8652b8990328281283bddb5b6cdb920c	95	54	0.0889621	512	ESAD	ESAD
ebb906810ec699e562cb9358a0c4915317c76ed19bdf166cb8b26aa61c8d8696	43	19	0.0432802	396	ESAD	ESAD
ebf7ea541c0d14c205dd1a7d16ed894a4ef2c0d5796122bf22a791b5114859da	27	10	0.0263852	352	ESAD	ESAD
ec1086015889ae545b0cb5b98d60a7a02bafe2a5650f7e32990ace37c08e5f1c	35	24	0.106667	190	ESAD	ESAD
ec1b7dd053c6288890ebba70cf1089af8943d7c5876796aaaa527b7a4131794b	31	16	0.0680851	204	ESAD	ESAD
eceb44da19ee3715c17ffb12e56c8ce4a25061e052f0da1267bb36ba0a4e2f23	50	27	0.0544355	446	ESAD	ESAD
f3c6585c83099259a929a7fc221b5702558e1bfd3ee5c9584a216a59f950aaff	27	12	0.0369231	298	ESAD	ESAD
f4661599926f32245eb1f3e52788501bd0897f45a6b27ca5cdede18edb14be28	25	12	0.034188	326	ESAD	ESAD
f766c67a2f3bc4d0cbb92614275ac052201cee5880928b2acd169e5802027797.2	13	9	0.0708661	114	ESAD	ESAD
f766c67a2f3bc4d0cbb92614275ac052201cee5880928b2acd169e5802027797.3	9	7	0.0518519	126	ESAD	ESAD
f837f50314409b71ad656412600a3a034ef97816e1717c200ccea489b29cbedc	45	25	0.058548	382	ESAD	ESAD
f9b321ca7e0e9d738cc4bdc16df6335c03a699de6cfdc1f0aaec1d18f17654ad	86	51	0.062963	724	ESAD	ESAD
f9d19a40c8e96a56205af0a2f2b7290a94f07f82c9635cac07dd71c063a5fa64	24	9	0.0368852	220	ESAD	ESAD
fadb396bcd77015f5a1a0dbdc830b53d9d9439ea9455173079b65e5221242029	73	40	0.0453001	810	ESAD	ESAD
fbcc66da7a4073672ef3f6cc4217349773552ed719dd04f411cc2f1e55587453	34	27	0.0592105	422	ESAD	ESAD
ff1ae33882f94afb4a45a6e93d6871f835891aecc93d52799058a07f25a0f449	26	20	0.0769231	234	ESAD	ESAD
ffe2e6c271347f25927c6e8975685a1b04934a0406f589f3df1608de00a7719f	19	11	0.0666667	146	ESAD	ESAD
ffedffc3ce438befa0e4d0c20dc30ac3575ad8df98f4acab601279ee7ab35f14	30	13	0.0351351	340	ESAD	ESAD
fff28d604ad38acee1c554c2c8ae8106f1b7325c057436bdb75b87bf12897fbd	54	24	0.0547945	384	ESAD	ESAD

## Sheet: 5E
gene_name	mappable	unmappable	n.total	frac.unmappable	nice.label
ABL1	13	2	15	0.133333
ALK	28	3	31	0.0967742
APC	28	0	28	0
AR	18	3	21	0.142857
ARID1A	19	3	22	0.136364
ASXL1	12	1	13	0.0769231
ATM	22	1	23	0.0434783
BCL2	30	0	30	0
BCOR	11	2	13	0.153846
BRAF	15	0	15	0
BRCA1	11	3	14	0.214286	BRCA1 (14)
BRCA2	12	0	12	0
BRINP3	49	6	55	0.109091
CBL	22	0	22	0
CCND1	15	1	16	0.0625
CDH1	16	0	16	0
CDK4	7	0	7	0
CDK6	78	3	81	0.037037
CDKN2A	41	2	43	0.0465116
CDKN2B	8	0	8	0
CHD1	8	0	8	0
CTNNB1	22	1	23	0.0434783
DNMT3A	4	1	5	0.2	DNMT3A (5)
EGFR	287	6	293	0.0204778
EP300	27	0	27	0
ERBB2	56	2	58	0.0344828
ERBB3	7	0	7	0
ERBB4	101	20	121	0.165289
ESR1	47	4	51	0.0784314
ETV6	77	2	79	0.0253165
EZH2	36	2	38	0.0526316
FANCL	10	1	11	0.0909091
FBXW7	36	1	37	0.027027
FGFR1	8	3	11	0.272727	FGFR1 (11)
FGFR2	15	0	15	0
FGFR3	6	3	9	0.333333	FGFR3 (9)
FLT3	10	2	12	0.166667
GNB1	20	0	20	0
IDH1	5	0	5	0
IKZF1	6	2	8	0.25	IKZF1 (8)
JAK1	5	1	6	0.166667
JAK2	15	4	19	0.210526	JAK2 (19)
KDM6A	46	8	54	0.148148
KDR	14	0	14	0
KIT	20	3	23	0.130435
KRAS	10	0	10	0
MAP2K1	11	1	12	0.0833333
MDM2	47	0	47	0
MET	17	0	17	0
MLH1	6	0	6	0
NCOA2	47	5	52	0.0961538
NOTCH1	12	3	15	0.2	NOTCH1 (15)
NOTCH2	21	3	24	0.125
NTRK1	12	3	15	0.2	NTRK1 (15)
PDGFRA	14	2	16	0.125
POLE	8	2	10	0.2	POLE (10)
PTCH1	8	0	8	0
PTEN	116	1	117	0.00854701
PTPN11	16	0	16	0
RAD21	10	1	11	0.0909091
RB1	88	2	90	0.0222222
RET	11	2	13	0.153846
RUNX1	205	12	217	0.0552995
SEPT14	16	0	16	0
SETBP1	33	0	33	0
SETD2	19	1	20	0.05
SF1	5	0	5	0
SH2B3	9	1	10	0.1
SMAD4	25	0	25	0
SMARCB1	5	3	8	0.375	SMARCB1 (8)
STAG2	34	7	41	0.170732
STK11	9	2	11	0.181818
SUZ12	8	1	9	0.111111
TET2	13	0	13	0
TP53	18	0	18	0
TSC1	6	0	6	0
TSC2	7	4	11	0.363636	TSC2 (11)
WT1	7	0	7	0
