# Supplementary material for: Most large structural variants in cancer genomes can be detected without long reads
Source: Nat Genet. 2023 Nov 9;55(12):2139–48. doi: 10.1038/s41588-023-01540-6 (PMC10703688; doi:10.1038/s41588-023-01540-6)
Supplement: Supplementary file 14 — Statistical source data for Extended Data Fig. 9. [file 41588_2023_1540_MOESM14_ESM.xlsx]

## Sheet: 9A
gs	query	method	gbp	total.query	fraction.query	gs.level	query.level	method.level	gbp.pretty
other	other	JaBbA	245.272	245.453	0.999264	other	other	JaBbA	245.27
upd	upd	JaBbA	4.88733	5.38581	0.907446	upd	upd	JaBbA	4.89
upd	other	JaBbA	0.17888	245.453	0.000728775	upd	other	JaBbA	0.18
other	upd	JaBbA	0.29074	5.38581	0.0539826	other	upd	JaBbA	0.29
cnloh	cnloh	JaBbA	1.13148	1.29352	0.874729	cnloh	cnloh	JaBbA	1.13
cnloh	upd	JaBbA	0.20774	5.38581	0.0385717	cnloh	upd	JaBbA	0.21
cnloh	other	JaBbA	0.00187	245.453	7.61857e-06	cnloh	other	JaBbA	0.00
other	cnloh	JaBbA	0.13602	1.29352	0.105155	other	cnloh	JaBbA	0.14
upd	cnloh	JaBbA	0.02602	1.29352	0.0201157	upd	cnloh	JaBbA	0.03
other	other	ASCAT	235.346	235.706	0.998475	other	other	ASCAT	235.35
upd	upd	ASCAT	4.53221	6.79877	0.666622	upd	upd	ASCAT	4.53
upd	other	ASCAT	0.34696	235.706	0.001472	upd	other	ASCAT	0.35
other	upd	ASCAT	1.49285	6.79877	0.219576	other	upd	ASCAT	1.49
cnloh	cnloh	ASCAT	0.49121	1.11549	0.440354	cnloh	cnloh	ASCAT	0.49
upd	cnloh	ASCAT	0.14386	1.11549	0.128966	upd	cnloh	ASCAT	0.14
other	cnloh	ASCAT	0.48042	1.11549	0.430681	other	cnloh	ASCAT	0.48
cnloh	other	ASCAT	0.01245	235.706	5.28201e-05	cnloh	other	ASCAT	0.01
cnloh	upd	ASCAT	0.77371	6.79877	0.113801	cnloh	upd	ASCAT	0.77
other	other	sequenza	229.18	231.461	0.990144	other	other	sequenza	229.18
upd	upd	sequenza	3.83189	9.57076	0.400375	upd	upd	sequenza	3.83
upd	other	sequenza	1.15697	231.461	0.00499855	upd	other	sequenza	1.16
other	upd	sequenza	5.71205	9.57076	0.596823	other	upd	sequenza	5.71
cnloh	cnloh	sequenza	0.11412	0.99807	0.114341	cnloh	cnloh	sequenza	0.11
other	cnloh	sequenza	0.8625	0.99807	0.864168	other	cnloh	sequenza	0.86
upd	cnloh	sequenza	0.02145	0.99807	0.0214915	upd	cnloh	sequenza	0.02
cnloh	other	sequenza	1.12423	231.461	0.0048571	cnloh	other	sequenza	1.12
cnloh	upd	sequenza	0.02682	9.57076	0.00280229	cnloh	upd	sequenza	0.03
other	other	FACETS	199.132	202.968	0.981099	other	other	FACETS	199.13
other	upd	FACETS	40.2759	42.8382	0.940188	other	upd	FACETS	40.28
upd	upd	FACETS	2.1216	42.8382	0.0495259	upd	upd	FACETS	2.12
upd	other	FACETS	2.97262	202.968	0.0146457	upd	other	FACETS	2.97
other	cnloh	FACETS	1.16271	1.18484	0.981322	other	cnloh	FACETS	1.16
cnloh	other	FACETS	0.86367	202.968	0.00425519	cnloh	other	FACETS	0.86
cnloh	upd	FACETS	0.44065	42.8382	0.0102864	cnloh	upd	FACETS	0.44
upd	cnloh	FACETS	0.02213	1.18484	0.0186776	upd	cnloh	FACETS	0.02
other	other	TITAN	239.666	240.987	0.99452	other	other	TITAN	239.67
upd	upd	TITAN	3.96532	7.11113	0.557622	upd	upd	TITAN	3.97
upd	other	TITAN	1.13949	240.987	0.00472844	upd	other	TITAN	1.14
other	upd	TITAN	2.35062	7.11113	0.330555	other	upd	TITAN	2.35
cnloh	cnloh	TITAN	0.3318	1.01593	0.326597	cnloh	cnloh	TITAN	0.33
cnloh	upd	TITAN	0.79519	7.11113	0.111823	cnloh	upd	TITAN	0.80
cnloh	other	TITAN	0.18108	240.987	0.000751411	cnloh	other	TITAN	0.18
other	cnloh	TITAN	0.65811	1.01593	0.647791	other	cnloh	TITAN	0.66
upd	cnloh	TITAN	0.02602	1.01593	0.025612	upd	cnloh	TITAN	0.03
other	other	JaBbA v0	246.348	246.878	0.99785	other	other	JaBbA v0	246.35
upd	upd	JaBbA v0	4.71725	7.80783	0.604169	upd	upd	JaBbA v0	4.72
upd	other	JaBbA v0	0.49731	246.878	0.00201439	upd	other	JaBbA v0	0.50
other	upd	JaBbA v0	1.82877	7.80783	0.234223	other	upd	JaBbA v0	1.83
cnloh	upd	JaBbA v0	1.26181	7.80783	0.161608	cnloh	upd	JaBbA v0	1.26
other	cnloh	JaBbA v0	0.17116	0.21707	0.788501	other	cnloh	JaBbA v0	0.17
upd	cnloh	JaBbA v0	1e-05	0.21707	4.60681e-05	upd	cnloh	JaBbA v0	0.00
cnloh	other	JaBbA v0	0.03337	246.878	0.000135168	cnloh	other	JaBbA v0	0.03
cnloh	cnloh	JaBbA v0	0.0459	0.21707	0.211453	cnloh	cnloh	JaBbA v0	0.05

## Sheet: 9B
method	variable	value	method.color	method.factor
ASCAT	precision	0.440354	other	ASCAT
FACETS	precision	0	other	FACETS
JaBbA	precision	0.874729	JaBbA	JaBbA
JaBbA v0	precision	0.211453	JaBbA v0	JaBbA v0
TITAN	precision	0.326597	other	TITAN
sequenza	precision	0.114341	other	sequenza
ASCAT	recall	0.384548	other	ASCAT
FACETS	recall	0	other	FACETS
JaBbA	recall	0.843702	JaBbA	JaBbA
JaBbA v0	recall	0.0342261	JaBbA v0	JaBbA v0
TITAN	recall	0.253656	other	TITAN
sequenza	recall	0.0902013	other	sequenza
ASCAT	f1	0.410563	other	ASCAT
FACETS	f1	0	other	FACETS
JaBbA	f1	0.858935	JaBbA	JaBbA
JaBbA v0	f1	0.058916	JaBbA v0	JaBbA v0
TITAN	f1	0.285542	other	TITAN
sequenza	f1	0.100847	other	sequenza

## Sheet: 9C
tumor_type_final	frac	count	n.cnloh	ci.lower	ci.upper
GBM	0.244444	45	11	0.13385	0.398607
ESAD	0.294118	187	55	0.231033	0.365826
OV	0.0869565	69	6	0.0358455	0.186017
LUSC	0.229167	48	11	0.125144	0.37666
LUAD	0.171429	70	12	0.0954513	0.284234
COAD	0.397059	68	27	0.282678	0.523125
AML	0.0869565	23	2	0.0152062	0.295088
KIRC	0.0384615	26	1	0.00201098	0.215824
HNSC	0.389831	59	23	0.268299	0.525719
MALY	0.522222	90	47	0.414876	0.627654
STAD	0.173913	46	8	0.0832219	0.319533
LIHC	0.153846	65	10	0.0801464	0.26939
LGG	0.363636	44	16	0.228259	0.522587
PRAD	0.0754717	53	4	0.0244548	0.190662
KICH	0	19	0	0	0.209206
BRCA	0.191083	157	30	0.134525	0.263147
UCEC	0.190476	42	8	0.0914128	0.346271
BLCA	0.461538	26	12	0.271384	0.662523
CESC	0.277778	18	5	0.107126	0.535942
MELA	0.237838	185	44	0.179798	0.307007
SARC	0.111111	45	5	0.0416363	0.24848
SCLC	0	45	0	0	0.0979649
