# Supplementary material for: Most large structural variants in cancer genomes can be detected without long reads
Source: Nat Genet. 2023 Nov 9;55(12):2139–48. doi: 10.1038/s41588-023-01540-6 (PMC10703688; doi:10.1038/s41588-023-01540-6)
Supplement: Supplementary file 15 — Statistical source data for Extended Data Fig. 10. [file 41588_2023_1540_MOESM15_ESM.xlsx]

## Sheet: 10B
breakend.type	germline.or.somatic	tot	n.pos	frac	ci.lower	ci.upper
SRS loose	somatic	2397	8	0.00333751	0.00155269	0.0068474
SRS loose	germline	282	42	0.148936	0.110563	0.197143
SRS junction	germline	4740	184	0.0388186	0.0335844	0.044814
SRS junction	somatic	5694	14	0.00245873	0.00139981	0.00423284
LRS junction	somatic	3352	34	0.0101432	0.00714312	0.0143134
LRS junction	germline	1978	934	0.472194	0.450017	0.49448

## Sheet: 10F
seqnames	mean.per.chr
1	0.108653
2	0.0807022
3	0.107745
4	0.0835863
5	0.101825
6	0.111664
7	0.12458
8	0.152358
9	0.0962494
10	0.0876234
11	0.137713
12	0.169296
13	0.0826692
14	0.094166
15	0.0813432
16	0.114957
17	0.190778
18	0.106872
20	0.145012
19	0.179788
22	0.122127
21	0.114072

## Sheet: 10G
seqnames	n	elg
1	5	1704190
10	8	2011447
11	23	2583559
12	1	896828
13	5	1057365
14	2	538775
15	4	1128090
16	17	914692
17	13	1818373
18	4	473864
19	9	1586704
2	6	1553497
20	6	496596
21	1	273440
22	7	897995
3	3	1293577
4	9	1318277
5	4	994026
6	2	1598071
7	35	3178989
8	5	599776
9	6	1154186
X	4	1669113
